# Supplementary material
Source: Research Square preprint supplement (doi:10.21203/rs.3.rs-9607376/v1)
Supplement: Supplementary file 1 [file 5a1545ca3cb174a8e5fe1e6e.xlsx]

## Sheet: Fig. 5b
H31-10 Scatter			BlockDepth histogram			Gaussian-fitting for BlockDepth			Restime histogram			LogNormal-fitting for Restime
BlockDepth	Restime (ms)		BlockDepth	Relative counts		BlockDepth	Relative counts		Restime (ms)	Relative counts		Restime (ms)	Relative counts
0.44574	0.45108		0.3015	2.03132E-4		0.3015	0.00107		0.05	0		0.05	0.00114
0.43483	0.35655		0.3045	8.46382E-5		0.30269	0.00107		0.15	0		0.06992	0.00422
0.42457	1.0733		0.3075	1.86204E-4		0.30299	0.00107		0.25	0.17648		0.08984	0.01118
0.42244	0.58731		0.3105	1.86204E-4		0.30328	0.00107		0.35	0.14192		0.10976	0.02221
0.42364	0.93503		0.3135	1.18493E-4		0.30358	0.00107		0.45	0.11623		0.12968	0.03643
0.42502	0.46563		0.3165	2.03132E-4		0.30388	0.00107		0.55	0.09475		0.1496	0.0525
0.11187	1.4452		0.3195	1.18493E-4		0.30418	0.00107		0.65	0.07686		0.15	0.05283
0.43086	1.72205		0.3225	1.69276E-4		0.30447	0.00107		0.75	0.0659		0.16952	0.06906
0.43669	0.85175		0.3255	2.36987E-4		0.3045	0.00107		0.85	0.05554		0.18944	0.08501
0.42917	0.86749		0.3285	1.69276E-4		0.30477	0.00107		0.95	0.04432		0.20936	0.09956
0.39229	0.3139		0.3315	1.69276E-4		0.30507	0.00107		1.05	0.03554		0.22928	0.11221
0.43113	0.92725		0.3345	2.03132E-4		0.30536	0.00107		1.15	0.03054		0.2492	0.12274
0.42204	1.42222		0.3375	3.5548E-4		0.30566	0.00107		1.25	0.02552		0.25	0.12311
0.43245	1.17075		0.3405	2.8777E-4		0.30596	0.00107		1.35	0.02195		0.26912	0.13107
0.43299	2.82737		0.3435	3.21625E-4		0.30626	0.00107		1.45	0.01796		0.28904	0.13728
0.44005	0.70063		0.3465	3.72408E-4		0.30655	0.00107		1.55	0.01521		0.30896	0.14153
0.36187	1.11891		0.3495	4.40118E-4		0.30685	0.00107		1.65	0.01263		0.32888	0.14402
0.43062	1.13621		0.3525	5.24757E-4		0.30715	0.00107		1.75	0.01157		0.3488	0.14496
0.42679	0.86207		0.3555	5.24757E-4		0.30745	0.00107		1.85	0.00874		0.35	0.14497
0.42861	1.30746		0.3585	5.41684E-4		0.3075	0.00107		1.95	0.00674		0.36872	0.14457
0.42143	1.14367		0.3615	6.60178E-4		0.30774	0.00107		2.05	0.00596		0.38864	0.14308
0.4597	0.28436		0.3645	6.94033E-4		0.30804	0.00107		2.15	0.00497		0.40856	0.14066
0.44209	1.07634		0.3675	6.77105E-4		0.30923	0.00107		2.25	0.00462		0.42848	0.13752
0.44786	0.38457		0.3705	7.95599E-4		0.30953	0.00107		2.35	0.00359		0.4484	0.13379
0.43117	0.43021		0.3735	0.00108		0.30982	0.00107		2.45	0.00322		0.45	0.13347
0.43211	1.13519		0.3765	0.00113		0.31012	0.00107		2.55	0.00254		0.46832	0.12963
0.39633	2.25477		0.3795	0.00151		0.3105	0.00107		2.65	0.00219		0.48824	0.12514
0.45876	0.32591		0.3825	0.00125		0.31101	0.00107		2.75	0.00157		0.50816	0.12044
0.42406	1.33235		0.3855	0.00134		0.31131	0.00107		2.85	0.00163		0.52808	0.1156
0.4398	0.58389		0.3885	0.0014		0.31161	0.00107		2.95	0.00123		0.548	0.11069
0.44384	0.48688		0.3915	0.00179		0.3122	0.00107		3.05	0.00106		0.55	0.1102
0.48424	0.22884		0.3945	0.00225		0.3128	0.00107		3.15	9.77007E-4		0.56792	0.10578
0.41993	0.30352		0.3975	0.00256		0.31339	0.00107		3.25	8.92782E-4		0.58784	0.1009
0.47515	0.65529		0.4005	0.00283		0.3135	0.00107		3.35	8.25402E-4		0.60776	0.0961
0.37713	0.37958		0.4035	0.00354		0.31369	0.00107		3.45	6.06418E-4		0.62768	0.09141
0.44201	1.45197		0.4065	0.00403		0.31399	0.00107		3.55	4.71658E-4		0.6476	0.08685
0.43084	0.92211		0.4095	0.0056		0.31428	0.00107		3.65	3.03209E-4		0.65	0.0863
0.43454	0.23563		0.4125	0.00767		0.31458	0.00107		3.75	5.55883E-4		0.66752	0.08242
0.44007	0.79366		0.4155	0.01122		0.31488	0.00107		3.85	3.36899E-4		0.68744	0.07816
0.41147	1.83717		0.4185	0.01556		0.31518	0.00107		3.95	2.52674E-4		0.70736	0.07406
0.45245	0.22314		0.4215	0.02197		0.31547	0.00107		4.05	2.86364E-4		0.72728	0.07013
0.42774	0.8869		0.4245	0.03101		0.31577	0.00107		4.15	1.51604E-4		0.7472	0.06637
0.43379	0.58429		0.4275	0.04401		0.31607	0.00107		4.25	3.03209E-4		0.75	0.06585
0.43165	0.64772		0.4305	0.05579		0.31636	0.00107		4.35	1.0107E-4		0.76712	0.06278
0.43683	0.32882		0.4335	0.06773		0.3165	0.00107		4.45	2.18984E-4		0.78704	0.05936
0.42013	1.23842		0.4365	0.07528		0.31666	0.00107		4.55	1.85294E-4		0.80696	0.05612
0.45142	0.79827		0.4395	0.07778		0.31696	0.00107		4.65	1.68449E-4		0.82688	0.05303
0.45985	0.22741		0.4425	0.07402		0.31726	0.00107		4.75	1.68449E-4		0.8468	0.0501
0.44234	0.5889		0.4455	0.07145		0.31755	0.00107		4.85	8.42247E-5		0.85	0.04965
0.44498	0.87511		0.4485	0.06385		0.31785	0.00107		4.95	1.3476E-4		0.86672	0.04733
0.44595	0.26709		0.4515	0.05674		0.31815	0.00107		5.05	1.0107E-4		0.88664	0.04471
0.44948	0.5248		0.4545	0.04765		0.31845	0.00107		5.15	1.3476E-4		0.90656	0.04223
0.44088	0.54727		0.4575	0.03866		0.31874	0.00107		5.25	6.73798E-5		0.92648	0.03988
0.42887	0.80373		0.4605	0.03441		0.31904	0.00107		5.35	1.0107E-4		0.9464	0.03766
0.42868	1.05654		0.4635	0.02796		0.31934	0.00107		5.45	1.0107E-4		0.95	0.03728
0.43112	0.51932		0.4665	0.02434		0.3195	0.00107		5.55	8.42247E-5		0.96632	0.03557
0.45484	0.23164		0.4695	0.02113		0.31964	0.00107		5.65	6.73798E-5		0.98624	0.0336
0.46559	0.41816		0.4725	0.01696		0.31993	0.00107		5.75	5.05348E-5		1.00616	0.03174
0.42813	0.90116		0.4755	0.01331		0.32023	0.00107		5.85	6.73798E-5		1.02608	0.02998
0.4651	0.40129		0.4785	0.01109		0.32053	0.00107		5.95	3.36899E-5		1.046	0.02832
0.42525	1.37164		0.4815	0.00997		0.32082	0.00107		6.05	6.73798E-5		1.05	0.028
0.49958	0.89517		0.4845	0.00763		0.32112	0.00107		6.15	3.36899E-5		1.06592	0.02676
0.4172	2.34715		0.4875	0.00708		0.32142	0.00107		6.25	5.05348E-5		1.08584	0.02529
0.4282	1.15468		0.4905	0.00528		0.32172	0.00107		6.35	5.05348E-5		1.10576	0.02391
0.43334	0.86364		0.4935	0.00457		0.32201	0.00107		6.45	3.36899E-5		1.12568	0.0226
0.40053	0.78728		0.4965	0.00335		0.32231	0.00107		6.55	0		1.1456	0.02137
0.43894	0.88312		0.4995	0.00235		0.3225	0.00107		6.65	8.42247E-5		1.15	0.02111
0.39804	0.21863		0.5025	0.00269		0.32261	0.00107		6.75	1.68449E-5		1.16552	0.02021
0.42572	0.40757		0.5055	0.00157		0.32291	0.00107		6.85	5.05348E-5		1.18544	0.01912
0.46364	0.26284		0.5085	0.00168		0.3232	0.00107		6.95	5.05348E-5		1.20536	0.01809
0.4222	0.86545		0.5115	0.00122		0.3235	0.00107		7.05	1.68449E-5		1.22528	0.01712
0.43134	0.45916		0.5145	0.00102		0.3238	0.00107		7.15	1.68449E-5		1.2452	0.01621
0.46748	0.26188		0.5175	7.27888E-4		0.32409	0.00107		7.25	6.73798E-5		1.25	0.01599
0.43452	0.40947		0.5205	4.73974E-4		0.32439	0.00107		7.35	5.05348E-5		1.26512	0.01535
0.42618	0.30483		0.5235	2.53915E-4		0.32469	0.00107		7.45	3.36899E-5		1.28504	0.01454
0.37718	0.79746		0.5265	1.52349E-4		0.32499	0.00107		7.55	1.68449E-5		1.30495	0.01377
0.43014	0.69174		0.5295	1.52349E-4		0.32528	0.00107		7.65	5.05348E-5		1.32487	0.01305
0.41509	0.43059		0.5325	1.01566E-4		0.3255	0.00107		7.75	3.36899E-5		1.34479	0.01237
0.42574	0.77621		0.5355	8.46382E-5		0.32558	0.00107		7.85	0		1.35	0.0122
0.4387	0.2519		0.5385	1.18493E-4		0.32588	0.00107		7.95	1.68449E-5		1.36471	0.01173
0.44585	1.08987		0.5415	1.69276E-4		0.32618	0.00107		8.05	0		1.38463	0.01113
0.42925	1.08269		0.5445	6.77105E-5		0.32647	0.00107		8.15	0		1.40455	0.01056
0.40796	1.03754		0.5475	5.07829E-5		0.32677	0.00107		8.25	5.05348E-5		1.42447	0.01002
0.46874	0.22755		0.5505	5.07829E-5		0.32707	0.00107		8.35	3.36899E-5		1.44439	0.00951
0.43172	0.38547		0.5535	3.38553E-5		0.32736	0.00107		8.45	0		1.45	0.00938
0.42861	1.92088		0.5565	1.18493E-4		0.32766	0.00107		8.55	1.68449E-5		1.46431	0.00904
0.44227	0.51067		0.5595	6.77105E-5		0.32796	0.00107		8.65	3.36899E-5		1.48423	0.00859
0.45245	0.62245		0.5625	3.38553E-5		0.32826	0.00107		8.75	0		1.50415	0.00816
0.44238	0.36058		0.5655	8.46382E-5		0.3285	0.00107		8.85	0		1.52407	0.00776
0.47848	0.28755		0.5685	5.07829E-5		0.32855	0.00107		8.95	1.68449E-5		1.54399	0.00738
0.42954	0.2719		0.5715	8.46382E-5		0.32885	0.00107		9.05	0		1.55	0.00727
0.43542	0.25256		0.5745	6.77105E-5		0.32915	0.00107		9.15	0		1.56391	0.00702
0.43462	0.30717		0.5775	1.18493E-4		0.32945	0.00107		9.25	3.36899E-5		1.58383	0.00668
0.43185	1.30819		0.5805	3.38553E-5		0.32974	0.00107		9.35	0		1.60375	0.00636
0.41851	0.62513		0.5835	8.46382E-5		0.33004	0.00107		9.45	0		1.62367	0.00606
0.41211	1.46746		0.5865	5.07829E-5		0.33034	0.00107		9.55	1.68449E-5		1.64359	0.00577
0.44476	0.22121		0.5895	8.46382E-5		0.33064	0.00107		9.65	1.68449E-5		1.65	0.00568
0.46139	0.25973		0.5925	3.38553E-5		0.33093	0.00107		9.75	1.68449E-5		1.66351	0.0055
0.4494	0.2962		0.5955	3.38553E-5		0.33123	0.00107		9.85	0		1.68343	0.00525
0.45011	0.40038		0.5985	3.38553E-5		0.3315	0.00107		9.95	0		1.70335	0.005
0.43718	0.81447					0.33153	0.00107		10.05	1.68449E-5		1.72327	0.00478
0.42744	0.99477					0.33182	0.00107		10.15	0		1.74319	0.00456
0.42353	0.35421					0.33212	0.00107		10.25	0		1.75	0.00449
0.42259	0.79969					0.33242	0.00107		10.35	0		1.76311	0.00435
0.40463	0.39901					0.33272	0.00107		10.45	0		1.78303	0.00416
0.4672	0.25162					0.33301	0.00107		10.55	0		1.80295	0.00398
0.45903	0.26066					0.33331	0.00107		10.65	0		1.82287	0.0038
0.45768	0.3872					0.33361	0.00107		10.75	0		1.84279	0.00364
0.43887	0.39225					0.33391	0.00107		10.85	0		1.85	0.00358
0.40799	5.08587					0.3342	0.00107		10.95	0		1.86271	0.00348
0.43805	0.6748					0.3345	0.00107		11.05	0		1.88263	0.00333
0.46618	0.30783					0.3348	0.00107		11.15	1.68449E-5		1.90255	0.00319
0.44203	0.2409					0.33509	0.00107		11.25	0		1.92247	0.00306
0.42387	2.04018					0.33539	0.00107		11.35	0		1.94239	0.00294
0.43893	0.78705					0.33569	0.00107		11.45	0		1.95	0.00289
0.42785	0.80702					0.33599	0.00107		11.55	0		1.96231	0.00282
0.43031	0.64004					0.33628	0.00107		11.65	0		1.98223	0.0027
0.43834	0.43298					0.33658	0.00107		11.75	0		2.00215	0.0026
0.44208	0.34658					0.33688	0.00107		11.85	0		2.02207	0.00249
0.4647	0.33774					0.33718	0.00107		11.95	0		2.04199	0.0024
0.44478	0.6364					0.33747	0.00107		12.05	1.68449E-5		2.05	0.00236
0.42431	0.51494					0.3375	0.00107		12.15	3.36899E-5		2.06191	0.0023
0.46631	0.44644					0.33777	0.00107		12.25	0		2.08183	0.00222
0.38638	0.28574					0.33807	0.00107		12.35	0		2.10175	0.00213
0.42803	1.19439					0.33836	0.00107		12.45	1.68449E-5		2.12167	0.00206
0.43406	0.5869					0.33866	0.00107		12.55	0		2.14159	0.00198
0.42776	1.41142					0.33896	0.00107		12.65	0		2.15	0.00195
0.46592	0.26811					0.33926	0.00107		12.75	0		2.16151	0.00191
0.42706	0.66666					0.33955	0.00107		12.85	0		2.18143	0.00184
0.42961	2.3886					0.33985	0.00107		12.95	0		2.20135	0.00178
0.42976	2.67831					0.34015	0.00107		13.05	0		2.22127	0.00172
0.43499	0.25191					0.34045	0.00107		13.15	0		2.24119	0.00166
0.42756	0.43671					0.3405	0.00107		13.25	0		2.25	0.00163
0.43898	1.05985					0.34074	0.00107		13.35	0		2.26111	0.0016
0.4396	1.13019					0.34104	0.00107		13.45	0		2.28103	0.00155
0.4274	0.96236					0.34134	0.00107		13.55	1.68449E-5		2.30095	0.0015
0.42245	0.39616					0.34164	0.00107		13.65	0		2.32087	0.00145
0.40559	0.34033					0.34193	0.00107		13.75	0		2.34079	0.00141
0.45021	0.40716					0.34223	0.00107		13.85	1.68449E-5		2.35	0.00139
0.45992	0.22346					0.34253	0.00107		13.95	1.68449E-5		2.36071	0.00136
0.43441	1.59432					0.34282	0.00107		14.05	0		2.38063	0.00132
0.42361	0.287					0.34312	0.00107		14.15	0		2.40055	0.00128
0.44194	0.47046					0.34342	0.00107		14.25	0		2.42047	0.00124
0.44428	1.08012					0.3435	0.00107		14.35	0		2.44039	0.00121
0.42478	1.43481					0.34372	0.00107		14.45	0		2.45	0.00119
0.45995	0.51448					0.34401	0.00107		14.55	0		2.46031	0.00117
0.46844	0.26659					0.34431	0.00107		14.65	1.68449E-5		2.48023	0.00114
0.41557	0.50669					0.34461	0.00107		14.75	0		2.50015	0.00111
0.43567	0.37873					0.34491	0.00107		14.85	0		2.52007	0.00108
0.43201	0.5603					0.3452	0.00107		14.95	0		2.53999	0.00105
0.42257	0.61495					0.3455	0.00107		15.05	0		2.55	0.00104
0.46448	0.241					0.3458	0.00107		15.15	1.68449E-5		2.55991	0.00103
0.45775	0.38648					0.34609	0.00107		15.25	0		2.57983	0.001
0.43518	0.64454					0.34639	0.00107		15.35	0		2.59975	9.76582E-4
0.43612	1.2956					0.3465	0.00107		15.45	0		2.61967	9.53213E-4
0.45422	0.38649					0.34669	0.00107		15.55	0		2.63959	9.309E-4
0.438	0.50113					0.34699	0.00107		15.65	0		2.65	9.19642E-4
0.44525	0.67367					0.34728	0.00107		15.75	0		2.65951	9.09591E-4
0.43075	1.35175					0.34758	0.00107		15.85	0		2.67943	8.89237E-4
0.44995	0.2383					0.34788	0.00107		15.95	0		2.69935	8.69792E-4
0.44109	0.6727					0.34818	0.00107		16.05	0		2.71927	8.51213E-4
0.42717	0.79731					0.34847	0.00107		16.15	1.68449E-5		2.73919	8.33457E-4
0.43737	0.52117					0.34877	0.00107		16.25	0		2.75	8.24151E-4
0.44069	1.52743					0.34907	0.00107		16.35	0		2.75911	8.16486E-4
0.43382	0.88337					0.34936	0.00107		16.45	0		2.77903	8.00261E-4
0.42607	0.26254					0.3495	0.00107		16.55	0		2.79895	7.84748E-4
0.44392	1.77948					0.34966	0.00107		16.65	0		2.81887	7.69913E-4
0.43203	0.33229					0.34996	0.00107		16.75	0		2.83879	7.55724E-4
0.44585	0.36285					0.35026	0.00107		16.85	0		2.85	7.48011E-4
0.42299	1.20852					0.35055	0.00107		16.95	0		2.85871	7.42151E-4
0.42252	0.60826					0.35085	0.00107		17.05	0		2.87863	7.29164E-4
0.42647	1.52063					0.35115	0.00107		17.15	0		2.89855	7.16737E-4
0.41263	0.28814					0.35145	0.00107		17.25	0		2.91847	7.04843E-4
0.44759	0.78799					0.35174	0.00107		17.35	0		2.93839	6.93457E-4
0.44001	0.44407					0.35204	0.00107		17.45	0		2.95	6.87046E-4
0.42638	1.06432					0.35234	0.00107		17.55	0		2.95831	6.82557E-4
0.43421	1.17584					0.3525	0.00107		17.65	0		2.97823	6.7212E-4
0.46509	0.2224					0.35264	0.00107		17.75	0		2.99815	6.62124E-4
0.45016	0.3435					0.35293	0.00107		17.85	0		3.01807	6.5255E-4
0.46362	0.26467					0.35323	0.00107		17.95	0		3.03799	6.43378E-4
0.46386	0.25111					0.35353	0.00107		18.05	0		3.05	6.38034E-4
0.42997	0.73266					0.35382	0.00107		18.15	0		3.05791	6.34591E-4
0.43684	0.49606					0.35412	0.00107		18.25	0		3.07783	6.2617E-4
0.42653	1.72015					0.35442	0.00107		18.35	0		3.09775	6.18099E-4
0.40687	0.60387					0.35472	0.00107		18.45	0		3.11767	6.10363E-4
0.42726	1.27181					0.35501	0.00107		18.55	0		3.13759	6.02946E-4
0.45362	0.41831					0.35531	0.00107		18.65	0		3.15	5.9848E-4
0.41987	0.26483					0.3555	0.00107		18.75	0		3.15751	5.95835E-4
0.43548	0.93105					0.35561	0.00107		18.85	0		3.17743	5.89015E-4
0.44127	0.29959					0.35591	0.00107		18.95	0		3.19735	5.82474E-4
0.39562	0.24848					0.3562	0.00107		19.05	0		3.21727	5.762E-4
0.42809	1.27903					0.3565	0.00107		19.15	0		3.23719	5.7018E-4
0.44026	0.97648					0.3568	0.00107		19.25	0		3.25	5.66438E-4
0.41829	1.26866					0.35709	0.00107		19.35	0		3.25711	5.64404E-4
0.43868	0.6366					0.35739	0.00107		19.45	0		3.27703	5.58861E-4
0.44899	0.41244					0.35769	0.00107		19.55	0		3.29695	5.53541E-4
0.44479	0.64393					0.35799	0.00107		19.65	0		3.31687	5.48434E-4
0.42318	0.95951					0.35828	0.00107		19.75	0		3.33679	5.43531E-4
0.45022	0.45166					0.3585	0.00107		19.85	0		3.35	5.40387E-4
0.42582	0.97644					0.35858	0.00107		19.95	0		3.35671	5.38823E-4
0.42578	0.52186					0.35888	0.00107					3.37663	5.34302E-4
0.45264	0.38452					0.35918	0.00107					3.39655	5.2996E-4
0.42836	0.43595					0.35947	0.00107					3.41647	5.25789E-4
0.45136	0.2083					0.35977	0.00107					3.43639	5.21782E-4
0.42687	0.42655					0.36007	0.00107					3.45	5.19134E-4
0.52126	0.86435					0.36036	0.00107					3.45631	5.17931E-4
0.44053	0.26215					0.36066	0.00107					3.47623	5.14231E-4
0.43282	0.95155					0.36096	0.00107					3.49615	5.10675E-4
0.44015	1.00819					0.36126	0.00107					3.51607	5.07257E-4
0.42777	0.98275					0.3615	0.00107					3.53599	5.03972E-4
0.42563	1.43238					0.36155	0.00107					3.55	5.01736E-4
0.42313	1.06469					0.36185	0.00107					3.55591	5.00812E-4
0.45267	0.48132					0.36215	0.00107					3.57583	4.97774E-4
0.41873	0.69951					0.36245	0.00107					3.59575	4.94853E-4
0.42227	0.8332					0.36274	0.00107					3.61567	4.92043E-4
0.43088	0.7					0.36304	0.00107					3.63559	4.8934E-4
0.46158	0.35496					0.36334	0.00107					3.65	4.87448E-4
0.42227	0.26819					0.36364	0.00107					3.65551	4.86739E-4
0.44204	1.19073					0.36393	0.00107					3.67543	4.84237E-4
0.42981	0.33495					0.36423	0.00107					3.69535	4.81829E-4
0.42595	0.53598					0.3645	0.00107					3.71527	4.79512E-4
0.43599	1.00844					0.36453	0.00107					3.73519	4.77282E-4
0.46734	0.23937					0.36482	0.00107					3.75	4.75677E-4
0.43607	0.63879					0.36512	0.00107					3.75511	4.75134E-4
0.4244	0.26644					0.36542	0.00107					3.77503	4.73067E-4
0.43135	0.70241					0.36572	0.00107					3.79494	4.71077E-4
0.4781	0.34702					0.36601	0.00107					3.81486	4.6916E-4
0.436	1.95354					0.36631	0.00107					3.83478	4.67314E-4
0.43456	0.97921					0.36661	0.00107					3.85	4.6595E-4
0.43352	0.62822					0.36691	0.00107					3.8547	4.65536E-4
0.43672	0.46678					0.3672	0.00107					3.87462	4.63823E-4
0.46682	0.29605					0.3675	0.00107					3.89454	4.62173E-4
0.43469	1.89958					0.3678	0.00107					3.91446	4.60583E-4
0.43585	0.60162					0.36809	0.00107					3.93438	4.59051E-4
0.45389	0.32436					0.36839	0.00107					3.95	4.57889E-4
0.4313	0.4716					0.36869	0.00107					3.9543	4.57574E-4
0.42373	0.2189					0.36899	0.00107					3.97422	4.56151E-4
0.43653	0.34315					0.36928	0.00107					3.99414	4.54779E-4
0.51389	0.22086					0.36958	0.00107					4.01406	4.53456E-4
0.44137	0.632					0.36988	0.00107					4.03398	4.52181E-4
0.42229	0.61796					0.37018	0.00107					4.05	4.51188E-4
0.44398	0.51153					0.37047	0.00107					4.0539	4.50951E-4
0.44774	0.5528					0.3705	0.00107					4.07382	4.49765E-4
0.45581	0.27287					0.37077	0.00107					4.09374	4.48621E-4
0.43094	0.54918					0.37107	0.00107					4.11366	4.47518E-4
0.43916	1.0002					0.37136	0.00107					4.13358	4.46453E-4
0.43665	0.27731					0.37166	0.00107					4.15	4.45604E-4
0.43386	0.45145					0.37196	0.00107					4.1535	4.45426E-4
0.43102	0.68295					0.37226	0.00107					4.17342	4.44436E-4
0.46648	0.3285					0.37255	0.00107					4.19334	4.43479E-4
0.44554	0.47594					0.37285	0.00107					4.21326	4.42557E-4
0.37772	0.9378					0.37315	0.00107					4.23318	4.41666E-4
0.43159	1.03359					0.37345	0.00107					4.25	4.40938E-4
0.41527	0.73111					0.3735	0.00107					4.2531	4.40806E-4
0.43429	2.54056					0.37374	0.00107					4.27302	4.39976E-4
0.44255	0.8994					0.37404	0.00107					4.29294	4.39175E-4
0.43915	0.66541					0.37434	0.00107					4.31286	4.38401E-4
0.43469	0.43034					0.37464	0.00107					4.33278	4.37654E-4
0.42648	0.45111					0.37493	0.00107					4.35	4.37029E-4
0.45411	0.34858					0.37523	0.00107					4.3527	4.36933E-4
0.42609	1.60718					0.37553	0.00107					4.37262	4.36236E-4
0.49249	0.21113					0.37582	0.00107					4.39254	4.35562E-4
0.42731	2.11525					0.37612	0.00107					4.41246	4.34912E-4
0.43347	1.14378					0.37642	0.00107					4.43238	4.34284E-4
0.42919	0.25524					0.3765	0.00107					4.45	4.33746E-4
0.43452	0.50931					0.37672	0.00107					4.4523	4.33677E-4
0.44318	0.52626					0.37701	0.00107					4.47222	4.3309E-4
0.43628	0.66896					0.37731	0.00107					4.49214	4.32523E-4
0.47009	0.31069					0.37761	0.00107					4.51206	4.31975E-4
0.45602	0.70665					0.37791	0.00107					4.53198	4.31445E-4
0.41867	2.14369					0.3782	0.00107					4.55	4.30981E-4
0.41648	0.66585					0.3785	0.00107					4.5519	4.30933E-4
0.42329	1.77328					0.3788	0.00107					4.57182	4.30438E-4
0.4337	0.44078					0.37909	0.00107					4.59174	4.2996E-4
0.43766	0.30252					0.37939	0.00107					4.61166	4.29497E-4
0.4503	0.60447					0.3795	0.00107					4.63158	4.29049E-4
0.4141	1.17141					0.37969	0.00107					4.65	4.28648E-4
0.42006	0.21466					0.37999	0.00107					4.6515	4.28616E-4
0.43038	2.37134					0.38028	0.00108					4.67142	4.28198E-4
0.42624	0.96723					0.38058	0.00108					4.69134	4.27793E-4
0.44357	0.33165					0.38088	0.00108					4.71126	4.27401E-4
0.44601	0.40382					0.38118	0.00108					4.73118	4.27022E-4
0.42221	0.58036					0.38147	0.00108					4.75	4.26675E-4
0.40086	2.54091					0.38177	0.00108					4.7511	4.26655E-4
0.41542	0.7479					0.38207	0.00108					4.77102	4.26301E-4
0.43538	0.56771					0.38236	0.00108					4.79094	4.25957E-4
0.21104	0.26587					0.3825	0.00108					4.81086	4.25625E-4
0.44794	0.76093					0.38266	0.00108					4.83078	4.25303E-4
0.46382	0.28356					0.38296	0.00109					4.85	4.25003E-4
0.4362	1.30941					0.38326	0.00109					4.8507	4.24992E-4
0.44922	0.44045					0.38355	0.00109					4.87062	4.2469E-4
0.45086	0.22486					0.38385	0.00109					4.89054	4.24399E-4
0.4404	0.4744					0.38415	0.00109					4.91046	4.24116E-4
0.44019	0.94585					0.38445	0.00109					4.93038	4.23843E-4
0.44987	0.4079					0.38474	0.0011					4.95	4.23582E-4
0.42684	1.39692					0.38504	0.0011					4.9503	4.23578E-4
0.44122	0.47292					0.38534	0.0011					4.97022	4.23321E-4
0.4463	0.58042					0.3855	0.0011					4.99014	4.23073E-4
0.44645	0.56861					0.38564	0.00111					5.01006	4.22832E-4
0.41448	0.43418					0.38593	0.00111					5.02998	4.22599E-4
0.43505	0.84683					0.38623	0.00111					5.0499	4.22373E-4
0.44747	1.0691					0.38653	0.00112					5.05	4.22372E-4
0.43097	0.58094					0.38682	0.00112					5.06982	4.22154E-4
0.43149	0.57222					0.38712	0.00112					5.08974	4.21942E-4
0.43078	3.77581					0.38742	0.00113					5.10966	4.21737E-4
0.44181	1.82393					0.38772	0.00113					5.12958	4.21538E-4
0.41914	0.85209					0.38801	0.00114					5.1495	4.21345E-4
0.42965	2.40705					0.38831	0.00114					5.15	4.2134E-4
0.41332	1.37206					0.3885	0.00115					5.16942	4.21158E-4
0.43979	0.38185					0.38861	0.00115					5.18934	4.20977E-4
0.43036	0.44302					0.38891	0.00116					5.20926	4.20801E-4
0.42625	0.31326					0.3892	0.00116					5.22918	4.20631E-4
0.49444	0.21871					0.3895	0.00117					5.2491	4.20465E-4
0.45613	0.28028					0.3898	0.00118					5.25	4.20458E-4
0.43203	1.81723					0.39009	0.00119					5.26902	4.20305E-4
0.43634	0.59424					0.39039	0.0012					5.28894	4.2015E-4
0.41573	0.37306					0.39069	0.00121					5.30886	4.19999E-4
0.43613	0.6183					0.39099	0.00122					5.32878	4.19853E-4
0.43431	0.87554					0.39128	0.00123					5.3487	4.19712E-4
0.1742	0.61298					0.3915	0.00124					5.35	4.19703E-4
0.42739	0.96416					0.39158	0.00124					5.36862	4.19574E-4
0.41965	0.72352					0.39188	0.00125					5.38854	4.19441E-4
0.44538	0.33149					0.39218	0.00127					5.40846	4.19312E-4
0.4549	0.27576					0.39247	0.00128					5.42838	4.19187E-4
0.42378	0.48724					0.39277	0.0013					5.4483	4.19065E-4
0.43776	1.01866					0.39307	0.00131					5.45	4.19055E-4
0.44011	0.24968					0.39336	0.00133					5.46822	4.18947E-4
0.44284	0.22742					0.39366	0.00135					5.48814	4.18832E-4
0.42684	0.37943					0.39396	0.00137					5.50806	4.18721E-4
0.44162	0.36401					0.39426	0.00139					5.52798	4.18613E-4
0.42911	0.68149					0.3945	0.00141					5.5479	4.18509E-4
0.41226	1.02051					0.39455	0.00141					5.55	4.18498E-4
0.43967	0.45486					0.39485	0.00144					5.56782	4.18407E-4
0.35146	1.6241					0.39515	0.00146					5.58774	4.18308E-4
0.47511	0.23595					0.39545	0.00149					5.60766	4.18212E-4
0.47605	0.22038					0.39574	0.00152					5.62758	4.18119E-4
0.44397	0.57895					0.39604	0.00155					5.6475	4.18029E-4
0.45672	0.58372					0.39634	0.00158					5.65	4.18018E-4
0.43924	1.47917					0.39664	0.00161					5.66742	4.17942E-4
0.45032	0.43134					0.39693	0.00165					5.68734	4.17856E-4
0.44422	0.54821					0.39723	0.00169					5.70726	4.17774E-4
0.43372	0.57983					0.3975	0.00172					5.72718	4.17693E-4
0.45612	0.77687					0.39753	0.00173					5.7471	4.17616E-4
0.42157	1.09267					0.39782	0.00177					5.75	4.17604E-4
0.4549	0.41669					0.39812	0.00182					5.76702	4.1754E-4
0.43392	0.68489					0.39842	0.00186					5.78694	4.17466E-4
0.442	2.61466					0.39872	0.00191					5.80686	4.17395E-4
0.42424	1.07476					0.39901	0.00196					5.82678	4.17325E-4
0.42986	1.10366					0.39931	0.00202					5.8467	4.17258E-4
0.43449	0.47195					0.39961	0.00208					5.85	4.17247E-4
0.43119	0.75919					0.39991	0.00214					5.86662	4.17192E-4
0.43289	0.76681					0.4002	0.00221					5.88654	4.17129E-4
0.38307	0.52187					0.4005	0.00227					5.90646	4.17067E-4
0.47425	0.32302					0.4008	0.00235					5.92638	4.17007E-4
0.43597	0.76622					0.40109	0.00242					5.9463	4.16948E-4
0.45059	0.78289					0.40139	0.0025					5.95	4.16938E-4
0.43032	0.47668					0.40169	0.00259					5.96622	4.16891E-4
0.44826	0.34768					0.40199	0.00267					5.98614	4.16836E-4
0.43043	0.54829					0.40228	0.00277					6.00606	4.16783E-4
0.42392	0.5516					0.40258	0.00286					6.02598	4.1673E-4
0.42733	1.58072					0.40288	0.00297					6.0459	4.1668E-4
0.42587	2.02272					0.40318	0.00307					6.05	4.16669E-4
0.44733	0.44997					0.40347	0.00318					6.06582	4.1663E-4
0.4721	0.27012					0.4035	0.00319					6.08574	4.16582E-4
0.44631	0.39237					0.40377	0.0033					6.10566	4.16536E-4
0.44028	1.33589					0.40407	0.00342					6.12558	4.16491E-4
0.43308	0.93413					0.40436	0.00355					6.1455	4.16446E-4
0.43403	0.60276					0.40466	0.00369					6.15	4.16437E-4
0.43887	1.56294					0.40496	0.00383					6.16542	4.16404E-4
0.4802	0.23698					0.40526	0.00397					6.18534	4.16362E-4
0.42629	2.16397					0.40555	0.00413					6.20526	4.16321E-4
0.45295	0.24977					0.40585	0.00429					6.22518	4.16282E-4
0.43925	0.84204					0.40615	0.00445					6.2451	4.16244E-4
0.42896	0.69708					0.40645	0.00463					6.25	4.16234E-4
0.38192	0.78991					0.4065	0.00466					6.26502	4.16206E-4
0.39355	3.71188					0.40674	0.00481					6.28493	4.1617E-4
0.4217	1.6592					0.40704	0.005					6.30485	4.16135E-4
0.37914	2.22691					0.40734	0.0052					6.32477	4.161E-4
0.41863	2.52801					0.40764	0.0054					6.34469	4.16067E-4
0.44655	0.47268					0.40793	0.00561					6.35	4.16058E-4
0.4601	0.27189					0.40823	0.00584					6.36461	4.16034E-4
0.42643	1.1801					0.40853	0.00607					6.38453	4.16003E-4
0.40801	8.24344					0.40882	0.00631					6.40445	4.15972E-4
0.43019	0.83994					0.40912	0.00656					6.42437	4.15942E-4
0.40839	0.76345					0.40942	0.00681					6.44429	4.15912E-4
0.44329	0.87266					0.4095	0.00689					6.45	4.15904E-4
0.444	0.87677					0.40972	0.00708					6.46421	4.15884E-4
0.5122	0.22348					0.41001	0.00736					6.48413	4.15856E-4
0.41676	0.8213					0.41031	0.00765					6.50405	4.15829E-4
0.42758	1.78798					0.41061	0.00795					6.52397	4.15803E-4
0.44237	0.34947					0.41091	0.00826					6.54389	4.15778E-4
0.41744	0.3633					0.4112	0.00858					6.55	4.1577E-4
0.41994	2.12451					0.4115	0.00891					6.56381	4.15753E-4
0.44933	0.4758					0.4118	0.00925					6.58373	4.15729E-4
0.46106	0.20153					0.41209	0.0096					6.60365	4.15705E-4
0.4516	0.27543					0.41239	0.00997					6.62357	4.15682E-4
0.42991	0.69282					0.4125	0.0101					6.64349	4.1566E-4
0.44913	0.45385					0.41269	0.01034					6.65	4.15653E-4
0.43999	0.45472					0.41299	0.01073					6.66341	4.15638E-4
0.43972	1.39153					0.41328	0.01113					6.68333	4.15617E-4
0.43499	0.50983					0.41358	0.01155					6.70325	4.15596E-4
0.44141	0.33867					0.41388	0.01197					6.72317	4.15576E-4
0.4333	0.58924					0.41418	0.01241					6.74309	4.15557E-4
0.42269	0.20348					0.41447	0.01286					6.75	4.1555E-4
0.45034	0.45583					0.41477	0.01333					6.76301	4.15537E-4
0.43757	0.39608					0.41507	0.0138					6.78293	4.15519E-4
0.42466	0.43386					0.41536	0.01429					6.80285	4.15501E-4
0.43453	0.93185					0.4155	0.01452					6.82277	4.15483E-4
0.44553	0.45106					0.41566	0.0148					6.84269	4.15466E-4
0.46634	0.20192					0.41596	0.01531					6.85	4.1546E-4
0.42637	0.52066					0.41626	0.01584					6.86261	4.15449E-4
0.43241	0.29101					0.41655	0.01639					6.88253	4.15433E-4
0.43506	0.99576					0.41685	0.01694					6.90245	4.15417E-4
0.44033	1.08897					0.41715	0.01751					6.92237	4.15401E-4
0.42894	0.35865					0.41745	0.0181					6.94229	4.15386E-4
0.42461	1.52784					0.41774	0.01869					6.95	4.15381E-4
0.42772	0.86061					0.41804	0.0193					6.96221	4.15372E-4
0.45082	0.2361					0.41834	0.01993					6.98213	4.15357E-4
0.43385	1.73875					0.4185	0.02027					7.00205	4.15343E-4
0.45365	0.31656					0.41864	0.02056					7.02197	4.1533E-4
0.43429	1.09543					0.41893	0.02121					7.04189	4.15316E-4
0.48059	0.34461					0.41923	0.02188					7.05	4.15311E-4
0.47603	0.30838					0.41953	0.02255					7.06181	4.15303E-4
0.4425	1.70274					0.41982	0.02324					7.08173	4.15291E-4
0.43237	1.7953					0.42012	0.02394					7.10165	4.15278E-4
0.44806	0.93391					0.42042	0.02466					7.12157	4.15266E-4
0.41189	0.25782					0.42072	0.02538					7.14149	4.15255E-4
0.44416	1.05824					0.42101	0.02612					7.15	4.1525E-4
0.38793	0.50949					0.42131	0.02687					7.16141	4.15243E-4
0.44527	0.3589					0.4215	0.02736					7.18133	4.15232E-4
0.45225	0.37548					0.42161	0.02763					7.20125	4.15221E-4
0.40839	0.36672					0.42191	0.02841					7.22117	4.15211E-4
0.44782	0.84908					0.4222	0.02919					7.24109	4.152E-4
0.4374	0.49133					0.4225	0.02999					7.25	4.15196E-4
0.43396	0.97971					0.4228	0.03079					7.26101	4.1519E-4
0.43951	2.11216					0.42309	0.03161					7.28093	4.1518E-4
0.42857	1.15446					0.42339	0.03243					7.30085	4.15171E-4
0.42756	1.92668					0.42369	0.03326					7.32077	4.15162E-4
0.43146	1.18326					0.42399	0.0341					7.34069	4.15152E-4
0.42006	0.41559					0.42428	0.03495					7.35	4.15148E-4
0.4297	1.10435					0.4245	0.03557					7.36061	4.15144E-4
0.44131	1.52896					0.42458	0.03581					7.38053	4.15135E-4
0.4321	0.91677					0.42488	0.03667					7.40045	4.15126E-4
0.45024	0.5032					0.42518	0.03754					7.42037	4.15118E-4
0.43484	1.54853					0.42547	0.03842					7.44029	4.1511E-4
0.46572	0.29312					0.42577	0.0393					7.45	4.15106E-4
0.43299	0.66334					0.42607	0.04018					7.46021	4.15102E-4
0.44633	0.90374					0.42636	0.04107					7.48013	4.15094E-4
0.42602	1.08833					0.42666	0.04197					7.50005	4.15087E-4
0.41696	1.15047					0.42696	0.04286					7.51997	4.1508E-4
0.44623	0.72735					0.42726	0.04376					7.53989	4.15073E-4
0.39732	2.13261					0.4275	0.0445					7.55	4.15069E-4
0.41551	1.2489					0.42755	0.04466					7.55981	4.15066E-4
0.42566	2.11531					0.42785	0.04556					7.57973	4.15059E-4
0.43961	1.1729					0.42815	0.04646					7.59965	4.15052E-4
0.41505	0.79162					0.42845	0.04736					7.61957	4.15046E-4
0.43723	1.01154					0.42874	0.04826					7.63949	4.15039E-4
0.42518	0.21095					0.42904	0.04915					7.65	4.15036E-4
0.42082	3.01692					0.42934	0.05004					7.65941	4.15033E-4
0.41353	3.35709					0.42964	0.05093					7.67933	4.15027E-4
0.4785	0.20412					0.42993	0.05181					7.69925	4.15021E-4
0.42137	1.22053					0.43023	0.05269					7.71917	4.15015E-4
0.48866	0.42822					0.4305	0.05348					7.73909	4.1501E-4
0.4515	0.47077					0.43053	0.05356					7.75	4.15007E-4
0.46008	0.4298					0.43082	0.05442					7.75901	4.15004E-4
0.46009	0.38742					0.43112	0.05528					7.77893	4.14999E-4
0.44114	0.35498					0.43142	0.05612					7.79885	4.14994E-4
0.45349	0.65935					0.43172	0.05696					7.81877	4.14989E-4
0.41666	0.81193					0.43201	0.05778					7.83869	4.14984E-4
0.47123	0.30313					0.43231	0.0586					7.85	4.14981E-4
0.43603	0.42719					0.43261	0.0594					7.85861	4.14979E-4
0.46109	0.21106					0.43291	0.06018					7.87853	4.14974E-4
0.43293	0.79338					0.4332	0.06096					7.89845	4.14969E-4
0.44105	1.14808					0.4335	0.06172					7.91837	4.14965E-4
0.44191	0.8427					0.4338	0.06246					7.93829	4.1496E-4
0.41329	0.39463					0.43409	0.06319					7.95	4.14958E-4
0.46458	0.20865					0.43439	0.0639					7.95821	4.14956E-4
0.43142	0.8927					0.43469	0.06459					7.97813	4.14952E-4
0.42324	1.23839					0.43499	0.06526					7.99805	4.14948E-4
0.43495	0.93686					0.43528	0.06591					8.01797	4.14944E-4
0.43345	0.87862					0.43558	0.06654					8.03789	4.1494E-4
0.41095	0.49495					0.43588	0.06716					8.05	4.14937E-4
0.4591	0.44913					0.43618	0.06775					8.05781	4.14936E-4
0.42482	0.9396					0.43647	0.06831					8.07773	4.14932E-4
0.48586	0.3563					0.4365	0.06836					8.09765	4.14929E-4
0.32857	0.32022					0.43677	0.06886					8.11757	4.14925E-4
0.46915	0.2094					0.43707	0.06938					8.13749	4.14921E-4
0.45032	0.37449					0.43736	0.06987					8.15	4.14919E-4
0.31837	0.94125					0.43766	0.07034					8.15741	4.14918E-4
0.45088	0.27803					0.43796	0.07079					8.17733	4.14915E-4
0.43435	0.95901					0.43826	0.07121					8.19725	4.14911E-4
0.45477	0.55264					0.43855	0.0716					8.21717	4.14908E-4
0.45765	0.26032					0.43885	0.07196					8.23709	4.14905E-4
0.4495	0.36971					0.43915	0.0723					8.25	4.14903E-4
0.45821	0.36789					0.43945	0.07261					8.25701	4.14902E-4
0.43813	0.79134					0.4395	0.07266					8.27693	4.14899E-4
0.41998	2.09088					0.43974	0.07289					8.29685	4.14896E-4
0.43068	1.08862					0.44004	0.07315					8.31677	4.14893E-4
0.44316	0.8714					0.44034	0.07337					8.33669	4.1489E-4
0.44694	0.45191					0.44064	0.07357					8.35	4.14889E-4
0.45039	0.40671					0.44093	0.07373					8.35661	4.14888E-4
0.38486	0.28087					0.44123	0.07387					8.37653	4.14885E-4
0.50022	0.2028					0.44153	0.07397					8.39645	4.14882E-4
0.48754	0.21938					0.44182	0.07405					8.41637	4.1488E-4
0.43459	0.74259					0.44212	0.07409					8.43629	4.14877E-4
0.41111	0.42374					0.44242	0.07411					8.45	4.14876E-4
0.43783	0.53434					0.4425	0.07411					8.45621	4.14875E-4
0.41361	1.00362					0.44272	0.0741					8.47613	4.14873E-4
0.42682	0.46125					0.44301	0.07405					8.49605	4.1487E-4
0.42834	1.35479					0.44331	0.07398					8.51597	4.14868E-4
0.44349	0.5382					0.44361	0.07387					8.53589	4.14866E-4
0.43415	0.59876					0.44391	0.07374					8.55	4.14864E-4
0.42616	1.93749					0.4442	0.07357					8.55581	4.14864E-4
0.44218	0.81859					0.4445	0.07338					8.57573	4.14861E-4
0.47452	0.20188					0.4448	0.07316					8.59565	4.14859E-4
0.43888	0.64519					0.44509	0.07291					8.61557	4.14857E-4
0.44853	0.42727					0.44539	0.07263					8.63549	4.14855E-4
0.44268	0.63097					0.4455	0.07252					8.65	4.14854E-4
0.48397	0.234					0.44569	0.07232					8.65541	4.14853E-4
0.43016	0.77202					0.44599	0.07198					8.67533	4.14851E-4
0.42957	0.46277					0.44628	0.07162					8.69525	4.1485E-4
0.45864	0.24476					0.44658	0.07123					8.71517	4.14848E-4
0.44222	0.23985					0.44688	0.07081					8.73509	4.14846E-4
0.40491	0.37925					0.44718	0.07036					8.75	4.14845E-4
0.43191	0.39926					0.44747	0.0699					8.75501	4.14844E-4
0.43546	0.801					0.44777	0.0694					8.77492	4.14842E-4
0.45204	0.36426					0.44807	0.06888					8.79484	4.14841E-4
0.43144	0.36119					0.44836	0.06834					8.81476	4.14839E-4
0.42746	0.57338					0.4485	0.06809					8.83468	4.14838E-4
0.40408	0.83692					0.44866	0.06777					8.85	4.14836E-4
0.42826	1.35516					0.44896	0.06719					8.8546	4.14836E-4
0.44455	0.87164					0.44926	0.06658					8.87452	4.14834E-4
0.44459	0.72433					0.44955	0.06594					8.89444	4.14833E-4
0.42971	0.71807					0.44985	0.06529					8.91436	4.14831E-4
0.42624	1.19627					0.45015	0.06462					8.93428	4.1483E-4
0.45767	0.31151					0.45045	0.06393					8.95	4.14829E-4
0.44439	0.62973					0.45074	0.06322					8.9542	4.14829E-4
0.4429	0.70112					0.45104	0.0625					8.97412	4.14827E-4
0.43793	0.20867					0.45134	0.06175					8.99404	4.14826E-4
0.43853	0.72746					0.4515	0.06134					9.01396	4.14825E-4
0.47609	0.2018					0.45164	0.061					9.03388	4.14823E-4
0.44508	0.44994					0.45193	0.06022					9.05	4.14822E-4
0.43246	0.50819					0.45223	0.05944					9.0538	4.14822E-4
0.44763	0.48478					0.45253	0.05864					9.07372	4.14821E-4
0.44059	1.27513					0.45282	0.05782					9.09364	4.1482E-4
0.42553	1.421					0.45312	0.057					9.11356	4.14818E-4
0.4539	0.59493					0.45342	0.05616					9.13348	4.14817E-4
0.4216	1.97235					0.45372	0.05532					9.15	4.14816E-4
0.42599	1.2227					0.45401	0.05446					9.1534	4.14816E-4
0.46081	0.2329					0.45431	0.0536					9.17332	4.14815E-4
0.43759	0.65117					0.4545	0.05305					9.19324	4.14814E-4
0.3641	0.47733					0.45461	0.05273					9.21316	4.14813E-4
0.44855	0.29116					0.45491	0.05185					9.23308	4.14812E-4
0.42023	2.54745					0.4552	0.05097					9.25	4.14811E-4
0.44548	0.49875					0.4555	0.05009					9.253	4.14811E-4
0.42648	0.32738					0.4558	0.04919					9.27292	4.1481E-4
0.43489	0.76371					0.45609	0.0483					9.29284	4.14809E-4
0.48228	0.21493					0.45639	0.0474					9.31276	4.14808E-4
0.42668	1.23086					0.45669	0.0465					9.33268	4.14807E-4
0.44423	0.45187					0.45699	0.0456					9.35	4.14806E-4
0.4513	0.49305					0.45728	0.04471					9.3526	4.14806E-4
0.41949	1.48345					0.4575	0.04405					9.37252	4.14805E-4
0.42351	1.88589					0.45758	0.04381					9.39244	4.14804E-4
0.42723	0.50254					0.45788	0.04291					9.41236	4.14803E-4
0.41745	1.84299					0.45818	0.04201					9.43228	4.14802E-4
0.42124	0.71889					0.45847	0.04112					9.45	4.14802E-4
0.45996	0.3191					0.45877	0.04023					9.4522	4.14802E-4
0.15937	0.44664					0.45907	0.03934					9.47212	4.14801E-4
0.42655	0.62312					0.45936	0.03846					9.49204	4.148E-4
0.43052	0.89657					0.45966	0.03759					9.51196	4.14799E-4
0.43967	2.18406					0.45996	0.03671					9.53188	4.14798E-4
0.44616	1.00238					0.46026	0.03585					9.55	4.14798E-4
0.45653	0.35031					0.4605	0.03515					9.5518	4.14798E-4
0.44008	0.48509					0.46055	0.03499					9.57172	4.14797E-4
0.44363	0.28988					0.46085	0.03414					9.59164	4.14796E-4
0.43995	1.39801					0.46115	0.0333					9.61156	4.14796E-4
0.43604	0.31138					0.46145	0.03247					9.63148	4.14795E-4
0.45619	0.27172					0.46174	0.03165					9.65	4.14794E-4
0.4121	0.24571					0.46204	0.03083					9.6514	4.14794E-4
0.43456	0.46301					0.46234	0.03003					9.67132	4.14794E-4
0.48456	0.29382					0.46264	0.02923					9.69124	4.14793E-4
0.41221	0.45105					0.46293	0.02845					9.71116	4.14792E-4
0.42376	0.5908					0.46323	0.02767					9.73108	4.14792E-4
0.42648	0.54418					0.4635	0.02698					9.75	4.14791E-4
0.41411	1.84767					0.46353	0.02691					9.751	4.14791E-4
0.43165	0.98326					0.46382	0.02616					9.77092	4.1479E-4
0.44458	0.34053					0.46412	0.02542					9.79084	4.1479E-4
0.4317	0.86765					0.46442	0.02469					9.81076	4.14789E-4
0.44231	0.52957					0.46472	0.02398					9.83068	4.14789E-4
0.41372	0.65885					0.46501	0.02328					9.85	4.14788E-4
0.43336	1.17071					0.46531	0.02259					9.8506	4.14788E-4
0.43053	0.45062					0.46561	0.02191					9.87052	4.14788E-4
0.44146	0.36569					0.46591	0.02125					9.89044	4.14787E-4
0.45194	0.75881					0.4662	0.02059					9.91036	4.14787E-4
0.40015	1.05241					0.4665	0.01996					9.93028	4.14786E-4
0.46081	0.24675					0.4668	0.01933					9.95	4.14786E-4
0.43445	0.40299					0.46709	0.01872					9.9502	4.14786E-4
0.43352	0.43151					0.46739	0.01812					9.97012	4.14785E-4
0.45701	0.21183					0.46769	0.01754					9.99004	4.14785E-4
0.43446	0.48013					0.46799	0.01697					10.01	4.14784E-4
0.43547	1.15212					0.46828	0.01641					10.0299	4.14784E-4
0.44549	0.45499					0.46858	0.01587					10.0498	4.14783E-4
0.44746	0.80437					0.46888	0.01534					10.05	4.14783E-4
0.44143	0.25151					0.46918	0.01482					10.0697	4.14783E-4
0.30422	3.41079					0.46947	0.01432					10.0896	4.14782E-4
0.45271	0.216					0.4695	0.01427					10.1096	4.14782E-4
0.45024	0.40603					0.46977	0.01383					10.1295	4.14782E-4
0.42639	0.83313					0.47007	0.01335					10.1494	4.14781E-4
0.41034	0.61594					0.47036	0.01288					10.15	4.14781E-4
0.44668	0.59903					0.47066	0.01243					10.1693	4.14781E-4
0.42519	2.14269					0.47096	0.01199					10.1892	4.1478E-4
0.43499	1.13604					0.47126	0.01157					10.2092	4.1478E-4
0.48816	0.24013					0.47155	0.01115					10.2291	4.1478E-4
0.42002	0.63116					0.47185	0.01075					10.249	4.14779E-4
0.45906	0.36064					0.47215	0.01036					10.25	4.14779E-4
0.45048	0.27503					0.47245	0.00998					10.2689	4.14779E-4
0.44562	0.47862					0.4725	0.00992					10.2888	4.14778E-4
0.43587	0.51133					0.47274	0.00962					10.3088	4.14778E-4
0.43193	0.38827					0.47304	0.00927					10.3287	4.14778E-4
0.41272	0.28644					0.47334	0.00892					10.3486	4.14777E-4
0.44072	0.544					0.47364	0.00859					10.35	4.14777E-4
0.46777	0.23653					0.47393	0.00827					10.3685	4.14777E-4
0.47815	0.27147					0.47423	0.00796					10.3884	4.14777E-4
0.44189	0.69937					0.47453	0.00766					10.4084	4.14776E-4
0.41125	0.65461					0.47482	0.00737					10.4283	4.14776E-4
0.42206	0.37195					0.47512	0.0071					10.4482	4.14776E-4
0.45474	0.30852					0.47542	0.00683					10.45	4.14776E-4
0.44449	0.69154					0.4755	0.00676					10.4681	4.14776E-4
0.43267	0.29811					0.47572	0.00657					10.488	4.14775E-4
0.43086	0.27547					0.47601	0.00632					10.508	4.14775E-4
0.44727	0.2912					0.47631	0.00608					10.5279	4.14775E-4
0.43066	0.26044					0.47661	0.00585					10.5478	4.14774E-4
0.36805	0.87923					0.47691	0.00562					10.55	4.14774E-4
0.4382	0.55383					0.4772	0.00541					10.5677	4.14774E-4
0.44169	0.37067					0.4775	0.00521					10.5876	4.14774E-4
0.43355	0.56889					0.4778	0.00501					10.6076	4.14774E-4
0.44334	0.67423					0.47809	0.00482					10.6275	4.14773E-4
0.47088	0.29897					0.47839	0.00464					10.6474	4.14773E-4
0.43624	0.96801					0.4785	0.00457					10.65	4.14773E-4
0.43826	0.28786					0.47869	0.00446					10.6673	4.14773E-4
0.46304	0.22355					0.47899	0.00429					10.6872	4.14773E-4
0.42178	1.08328					0.47928	0.00413					10.7072	4.14772E-4
0.46278	0.5595					0.47958	0.00398					10.7271	4.14772E-4
0.42445	3.05914					0.47988	0.00383					10.747	4.14772E-4
0.42346	1.15878					0.48018	0.00369					10.75	4.14772E-4
0.4264	2.46652					0.48047	0.00356					10.7669	4.14772E-4
0.43913	0.42782					0.48077	0.00343					10.7868	4.14771E-4
0.43698	1.14889					0.48107	0.00331					10.8068	4.14771E-4
0.4331	0.79902					0.48136	0.00319					10.8267	4.14771E-4
0.43475	0.45476					0.4815	0.00314					10.8466	4.14771E-4
0.44049	0.33847					0.48166	0.00308					10.85	4.14771E-4
0.43882	1.448					0.48196	0.00297					10.8665	4.14771E-4
0.43883	0.31709					0.48226	0.00287					10.8864	4.1477E-4
0.44061	0.84496					0.48255	0.00277					10.9064	4.1477E-4
0.40403	0.55927					0.48285	0.00268					10.9263	4.1477E-4
0.42607	1.40553					0.48315	0.00259					10.9462	4.1477E-4
0.43099	0.31246					0.48345	0.00251					10.95	4.1477E-4
0.43637	1.05829					0.48374	0.00243					10.9661	4.1477E-4
0.43286	0.35587					0.48404	0.00235					10.986	4.14769E-4
0.46076	0.20475					0.48434	0.00228					11.006	4.14769E-4
0.42989	0.35535					0.4845	0.00224					11.0259	4.14769E-4
0.42954	0.50816					0.48464	0.00221					11.0458	4.14769E-4
0.4335	0.62386					0.48493	0.00214					11.05	4.14769E-4
0.42609	3.27243					0.48523	0.00208					11.0657	4.14769E-4
0.43956	1.02098					0.48553	0.00202					11.0856	4.14769E-4
0.40818	0.76862					0.48582	0.00197					11.1056	4.14768E-4
0.45259	0.38199					0.48612	0.00191					11.1255	4.14768E-4
0.42665	2.28832					0.48642	0.00186					11.1454	4.14768E-4
0.44651	0.31138					0.48672	0.00182					11.15	4.14768E-4
0.45067	1.1425					0.48701	0.00177					11.1653	4.14768E-4
0.40986	1.14955					0.48731	0.00173					11.1852	4.14768E-4
0.42295	1.14178					0.4875	0.0017					11.2052	4.14768E-4
0.4242	2.90415					0.48761	0.00169					11.2251	4.14768E-4
0.46739	0.37268					0.48791	0.00165					11.245	4.14767E-4
0.44658	0.4393					0.4882	0.00162					11.25	4.14767E-4
0.46128	0.22779					0.4885	0.00158					11.2649	4.14767E-4
0.42871	0.76252					0.4888	0.00155					11.2848	4.14767E-4
0.46112	0.40012					0.48909	0.00152					11.3048	4.14767E-4
0.44481	0.63105					0.48939	0.00149					11.3247	4.14767E-4
0.41817	0.84153					0.48969	0.00146					11.3446	4.14767E-4
0.42987	0.27173					0.48999	0.00144					11.35	4.14767E-4
0.4614	0.34026					0.49028	0.00142					11.3645	4.14767E-4
0.41894	1.40406					0.4905	0.0014					11.3844	4.14766E-4
0.37557	0.25493					0.49058	0.00139					11.4044	4.14766E-4
0.43783	0.32318					0.49088	0.00137					11.4243	4.14766E-4
0.48057	0.20085					0.49118	0.00135					11.4442	4.14766E-4
0.43493	1.13912					0.49147	0.00133					11.45	4.14766E-4
0.46056	0.71847					0.49177	0.00132					11.4641	4.14766E-4
0.42727	0.55563					0.49207	0.0013					11.484	4.14766E-4
0.42583	0.40712					0.49236	0.00128					11.5039	4.14766E-4
0.44884	0.36072					0.49266	0.00127					11.5239	4.14766E-4
0.43348	1.16936					0.49296	0.00125					11.5438	4.14766E-4
0.43708	1.96712					0.49326	0.00124					11.55	4.14765E-4
0.46207	0.47454					0.4935	0.00123					11.5637	4.14765E-4
0.43992	0.41821					0.49355	0.00123					11.5836	4.14765E-4
0.42646	0.75684					0.49385	0.00122					11.6036	4.14765E-4
0.45406	0.63915					0.49415	0.00121					11.6235	4.14765E-4
0.44708	0.37081					0.49445	0.0012					11.6434	4.14765E-4
0.41497	2.70594					0.49474	0.00119					11.65	4.14765E-4
0.42069	0.35617					0.49504	0.00118					11.6633	4.14765E-4
0.41444	0.54261					0.49534	0.00117					11.6832	4.14765E-4
0.44598	0.59209					0.49564	0.00116					11.7032	4.14765E-4
0.39205	0.51889					0.49593	0.00116					11.7231	4.14765E-4
0.40806	0.80904					0.49623	0.00115					11.743	4.14765E-4
0.46031	0.22475					0.4965	0.00115					11.75	4.14764E-4
0.43586	0.54699					0.49653	0.00115					11.7629	4.14764E-4
0.42484	0.33151					0.49682	0.00114					11.7828	4.14764E-4
0.43425	0.98704					0.49712	0.00113					11.8027	4.14764E-4
0.42349	0.53977					0.49742	0.00113					11.8227	4.14764E-4
0.47794	0.27099					0.49772	0.00112					11.8426	4.14764E-4
0.44665	1.08697					0.49801	0.00112					11.85	4.14764E-4
0.43565	0.6355					0.49831	0.00112					11.8625	4.14764E-4
0.43495	0.37434					0.49861	0.00111					11.8824	4.14764E-4
0.37942	1.17192					0.49891	0.00111					11.9024	4.14764E-4
0.45229	0.42859					0.4992	0.00111					11.9223	4.14764E-4
0.42188	0.90753					0.4995	0.0011					11.9422	4.14764E-4
0.44057	0.65182					0.4998	0.0011					11.95	4.14764E-4
0.43669	0.57076					0.50009	0.0011					11.9621	4.14764E-4
0.44797	0.25645					0.50039	0.0011					11.982	4.14764E-4
0.44485	0.31627					0.50069	0.00109					12.002	4.14763E-4
0.44311	0.68731					0.50099	0.00109					12.0219	4.14763E-4
0.43738	2.34781					0.50128	0.00109					12.0418	4.14763E-4
0.42581	2.35526					0.50158	0.00109					12.05	4.14763E-4
0.44454	0.7555					0.50188	0.00109					12.0617	4.14763E-4
0.42127	1.79601					0.50218	0.00108					12.0816	4.14763E-4
0.46393	0.21889					0.50247	0.00108					12.1015	4.14763E-4
0.44274	0.35032					0.5025	0.00108					12.1215	4.14763E-4
0.43451	0.58919					0.50277	0.00108					12.1414	4.14763E-4
0.44921	0.57319					0.50307	0.00108					12.15	4.14763E-4
0.43265	1.75918					0.50336	0.00108					12.1613	4.14763E-4
0.43053	1.12523					0.50366	0.00108					12.1812	4.14763E-4
0.48779	0.22106					0.50396	0.00108					12.2012	4.14763E-4
0.43797	1.20768					0.50426	0.00108					12.2211	4.14763E-4
0.40552	0.53575					0.50455	0.00108					12.241	4.14763E-4
0.44269	0.86733					0.50485	0.00107					12.25	4.14763E-4
0.45691	0.46873					0.50515	0.00107					12.2609	4.14763E-4
0.43331	0.6872					0.50545	0.00107					12.2808	4.14763E-4
0.46051	0.46841					0.5055	0.00107					12.3008	4.14763E-4
0.41781	1.14521					0.50574	0.00107					12.3207	4.14762E-4
0.42475	0.35301					0.50604	0.00107					12.3406	4.14762E-4
0.43979	0.33404					0.50634	0.00107					12.35	4.14762E-4
0.44965	1.55671					0.50664	0.00107					12.3605	4.14762E-4
0.43816	0.52845					0.50693	0.00107					12.3804	4.14762E-4
0.41556	0.35927					0.50723	0.00107					12.4003	4.14762E-4
0.43098	1.14414					0.50753	0.00107					12.4203	4.14762E-4
0.47122	0.41552					0.50782	0.00107					12.4402	4.14762E-4
0.43145	1.00119					0.50812	0.00107					12.45	4.14762E-4
0.44309	0.3906					0.50842	0.00107					12.4601	4.14762E-4
0.44006	0.41619					0.5085	0.00107					12.48	4.14762E-4
0.43751	1.32996					0.50872	0.00107					12.5	4.14762E-4
0.42354	0.49151					0.50901	0.00107					12.5199	4.14762E-4
0.46477	0.29495					0.50931	0.00107					12.5398	4.14762E-4
0.44789	0.27141					0.50961	0.00107					12.55	4.14762E-4
0.42908	1.04684					0.50991	0.00107					12.5597	4.14762E-4
0.42699	0.49618					0.5102	0.00107					12.5796	4.14762E-4
0.43999	0.66516					0.5105	0.00107					12.5996	4.14762E-4
0.45787	0.28743					0.5108	0.00107					12.6195	4.14762E-4
0.43785	0.56635					0.51109	0.00107					12.6394	4.14762E-4
0.44165	0.8524					0.51139	0.00107					12.65	4.14762E-4
0.29714	0.417					0.5115	0.00107					12.6593	4.14762E-4
0.4162	1.83832					0.51169	0.00107					12.6792	4.14762E-4
0.43709	1.27091					0.51199	0.00107					12.6991	4.14762E-4
0.44599	1.36963					0.51228	0.00107					12.7191	4.14762E-4
0.46538	0.48033					0.51258	0.00107					12.739	4.14761E-4
0.44087	0.64851					0.51288	0.00107					12.75	4.14761E-4
0.43782	0.53071					0.51318	0.00107					12.7589	4.14761E-4
0.41758	1.20399					0.51347	0.00107					12.7788	4.14761E-4
0.36402	1.76906					0.51377	0.00107					12.7988	4.14761E-4
0.44003	0.69256					0.51407	0.00107					12.8187	4.14761E-4
0.42191	0.88768					0.51436	0.00107					12.8386	4.14761E-4
0.43081	0.26873					0.5145	0.00107					12.85	4.14761E-4
0.45268	0.54609					0.51466	0.00107					12.8585	4.14761E-4
0.43396	0.56338					0.51496	0.00107					12.8784	4.14761E-4
0.442	0.37627					0.51526	0.00107					12.8984	4.14761E-4
0.4345	1.02391					0.51555	0.00107					12.9183	4.14761E-4
0.44853	0.27774					0.51585	0.00107					12.9382	4.14761E-4
0.4418	0.26497					0.51615	0.00107					12.95	4.14761E-4
0.44127	0.30547					0.51645	0.00107					12.9581	4.14761E-4
0.45231	0.24435					0.51674	0.00107					12.978	4.14761E-4
0.4053	0.35283					0.51704	0.00107					12.9979	4.14761E-4
0.446	1.21272					0.51734	0.00107					13.0179	4.14761E-4
0.42544	0.61148					0.5175	0.00107					13.0378	4.14761E-4
0.42574	0.75853					0.51764	0.00107					13.05	4.14761E-4
0.41726	0.90986					0.51793	0.00107					13.0577	4.14761E-4
0.43723	0.41002					0.51823	0.00107					13.0776	4.14761E-4
0.43633	0.56308					0.51853	0.00107					13.0976	4.14761E-4
0.41932	1.10775					0.51882	0.00107					13.1175	4.14761E-4
0.456	0.37151					0.51912	0.00107					13.1374	4.14761E-4
0.43706	1.04782					0.51942	0.00107					13.15	4.14761E-4
0.48673	0.23566					0.51972	0.00107					13.1573	4.14761E-4
0.4478	0.41967					0.52001	0.00107					13.1772	4.14761E-4
0.44751	0.3479					0.52031	0.00107					13.1972	4.14761E-4
0.44827	0.77644					0.5205	0.00107					13.2171	4.14761E-4
0.44924	0.27142					0.52061	0.00107					13.237	4.14761E-4
0.42977	1.16509					0.52091	0.00107					13.25	4.14761E-4
0.41597	0.29841					0.5212	0.00107					13.2569	4.14761E-4
0.42099	1.9925					0.5215	0.00107					13.2768	4.14761E-4
0.43089	0.72846					0.5218	0.00107					13.2967	4.14761E-4
0.43693	0.97016					0.52209	0.00107					13.3167	4.14761E-4
0.43217	0.65659					0.52239	0.00107					13.3366	4.14761E-4
0.4699	0.32829					0.52269	0.00107					13.35	4.14761E-4
0.39451	0.95097					0.52299	0.00107					13.3565	4.14761E-4
0.46128	0.47421					0.52328	0.00107					13.3764	4.14761E-4
0.43728	1.17553					0.5235	0.00107					13.3963	4.14761E-4
0.5014	0.22254					0.52358	0.00107					13.4163	4.1476E-4
0.44559	1.56136					0.52388	0.00107					13.4362	4.1476E-4
0.43362	0.99273					0.52418	0.00107					13.45	4.1476E-4
0.43645	0.34827					0.52447	0.00107					13.4561	4.1476E-4
0.43335	0.90587					0.52477	0.00107					13.476	4.1476E-4
0.4358	0.27869					0.52507	0.00107					13.496	4.1476E-4
0.43928	0.48824					0.52536	0.00107					13.5159	4.1476E-4
0.40815	0.96431					0.52566	0.00107					13.5358	4.1476E-4
0.44976	0.51467					0.52596	0.00107					13.55	4.1476E-4
0.42725	1.05932					0.52626	0.00107					13.5557	4.1476E-4
0.44155	0.51208					0.5265	0.00107					13.5756	4.1476E-4
0.44372	1.00839					0.52655	0.00107					13.5955	4.1476E-4
0.45973	0.43548					0.52685	0.00107					13.6155	4.1476E-4
0.44097	0.71322					0.52715	0.00107					13.6354	4.1476E-4
0.46077	0.21118					0.52745	0.00107					13.65	4.1476E-4
0.4305	0.94319					0.52774	0.00107					13.6553	4.1476E-4
0.43987	1.02946					0.52804	0.00107					13.6752	4.1476E-4
0.43267	0.92218					0.52834	0.00107					13.6951	4.1476E-4
0.43209	0.74985					0.52864	0.00107					13.7151	4.1476E-4
0.42817	1.43983					0.52893	0.00107					13.735	4.1476E-4
0.44589	0.60666					0.52923	0.00107					13.75	4.1476E-4
0.30712	2.19097					0.5295	0.00107					13.7549	4.1476E-4
0.85991	0.24261					0.52953	0.00107					13.7748	4.1476E-4
0.44166	0.56066					0.52982	0.00107					13.7947	4.1476E-4
0.43376	0.97807					0.53012	0.00107					13.8147	4.1476E-4
0.44241	0.63188					0.53042	0.00107					13.8346	4.1476E-4
0.42887	0.79703					0.53072	0.00107					13.85	4.1476E-4
0.43416	0.63202					0.53101	0.00107					13.8545	4.1476E-4
0.44288	0.59666					0.53131	0.00107					13.8744	4.1476E-4
0.46629	0.26454					0.53161	0.00107					13.8943	4.1476E-4
0.43674	0.22797					0.53191	0.00107					13.9143	4.1476E-4
0.42674	1.15747					0.5322	0.00107					13.9342	4.1476E-4
0.42594	0.40771					0.5325	0.00107					13.95	4.1476E-4
0.44703	0.34958					0.5328	0.00107					13.9541	4.1476E-4
0.64848	0.41784					0.53309	0.00107					13.974	4.1476E-4
0.47981	0.32049					0.53339	0.00107					13.9939	4.1476E-4
0.43957	0.41409					0.53369	0.00107					14.0139	4.1476E-4
0.43478	0.77115					0.53399	0.00107					14.0338	4.1476E-4
0.42425	1.41764					0.53428	0.00107					14.05	4.1476E-4
0.48097	0.29321					0.53458	0.00107					14.0537	4.1476E-4
0.44065	0.96282					0.53488	0.00107					14.0736	4.1476E-4
0.45741	0.33651					0.53518	0.00107					14.0935	4.1476E-4
0.42671	0.55105					0.53547	0.00107					14.1135	4.1476E-4
0.42224	0.4114					0.5355	0.00107					14.1334	4.1476E-4
0.46566	0.21919					0.53577	0.00107					14.15	4.1476E-4
0.43045	0.30098					0.53607	0.00107					14.1533	4.1476E-4
0.44073	0.53231					0.53636	0.00107					14.1732	4.1476E-4
0.42371	0.59339					0.53666	0.00107					14.1931	4.1476E-4
0.406	0.82452					0.53696	0.00107					14.2131	4.1476E-4
0.45013	1.40803					0.53726	0.00107					14.233	4.1476E-4
0.4523	0.40394					0.53755	0.00107					14.25	4.1476E-4
0.41859	1.02433					0.53785	0.00107					14.2529	4.1476E-4
0.47137	0.22304					0.53815	0.00107					14.2728	4.1476E-4
0.40677	0.87692					0.53845	0.00107					14.2927	4.1476E-4
0.43145	0.6321					0.5385	0.00107					14.3127	4.1476E-4
0.43142	0.22031					0.53874	0.00107					14.3326	4.1476E-4
0.42628	1.64473					0.53904	0.00107					14.35	4.1476E-4
0.44205	0.36577					0.53934	0.00107					14.3525	4.1476E-4
0.42851	0.54776					0.53964	0.00107					14.3724	4.1476E-4
0.47096	0.20864					0.53993	0.00107					14.3923	4.1476E-4
0.42703	1.78051					0.54023	0.00107					14.4123	4.1476E-4
0.4429	0.31685					0.54053	0.00107					14.4322	4.1476E-4
0.44253	1.52264					0.54082	0.00107					14.45	4.1476E-4
0.45363	0.28698					0.54112	0.00107					14.4521	4.1476E-4
0.45217	0.74621					0.54142	0.00107					14.472	4.1476E-4
0.44257	0.44117					0.5415	0.00107					14.4919	4.1476E-4
0.43911	0.45442					0.54172	0.00107					14.5119	4.1476E-4
0.41993	1.29187					0.54201	0.00107					14.5318	4.1476E-4
0.44151	0.52478					0.54231	0.00107					14.55	4.1476E-4
0.43327	1.17169					0.54261	0.00107					14.5517	4.1476E-4
0.44011	0.66472					0.54291	0.00107					14.5716	4.1476E-4
0.43339	1.41029					0.5432	0.00107					14.5915	4.1476E-4
0.48446	0.21237					0.5435	0.00107					14.6115	4.1476E-4
0.45317	0.26012					0.5438	0.00107					14.6314	4.1476E-4
0.46337	0.28792					0.54409	0.00107					14.65	4.1476E-4
0.41899	0.52031					0.54439	0.00107					14.6513	4.1476E-4
0.39444	0.9357					0.5445	0.00107					14.6712	4.1476E-4
0.43514	0.29934					0.54469	0.00107					14.6911	4.1476E-4
0.47139	0.23856					0.54499	0.00107					14.7111	4.1476E-4
0.42843	0.73776					0.54528	0.00107					14.731	4.1476E-4
0.45629	0.30712					0.54558	0.00107					14.75	4.1476E-4
0.41889	0.24862					0.54588	0.00107					14.7509	4.1476E-4
0.44759	0.31136					0.54618	0.00107					14.7708	4.1476E-4
0.43687	1.09227					0.54647	0.00107					14.7907	4.1476E-4
0.42468	0.37968					0.54677	0.00107					14.8107	4.1476E-4
0.41262	0.33711					0.54707	0.00107					14.8306	4.1476E-4
0.44814	0.79297					0.54736	0.00107					14.85	4.1476E-4
0.42313	1.23029					0.5475	0.00107					14.8505	4.1476E-4
0.45986	0.31993					0.54766	0.00107					14.8704	4.1476E-4
0.42956	2.05802					0.54796	0.00107					14.8903	4.1476E-4
0.4369	0.98139					0.54826	0.00107					14.9103	4.1476E-4
0.4252	0.28015					0.54855	0.00107					14.9302	4.1476E-4
0.44294	0.88918					0.54885	0.00107					14.95	4.1476E-4
0.43336	0.28545					0.54915	0.00107					14.9501	4.1476E-4
0.43522	0.54423					0.54945	0.00107					14.97	4.1476E-4
0.43935	0.7268					0.54974	0.00107					14.9899	4.1476E-4
0.45406	0.44866					0.55004	0.00107					15.0099	4.14759E-4
0.43029	0.59535					0.55034	0.00107					15.0298	4.14759E-4
0.41907	1.95905					0.5505	0.00107					15.0497	4.14759E-4
0.42225	1.22387					0.55064	0.00107					15.05	4.14759E-4
0.43696	0.3659					0.55093	0.00107					15.0696	4.14759E-4
0.42377	1.10342					0.55123	0.00107					15.0895	4.14759E-4
0.43466	1.68818					0.55153	0.00107					15.1095	4.14759E-4
0.43182	1.04488					0.55182	0.00107					15.1294	4.14759E-4
0.47883	0.25033					0.55212	0.00107					15.1493	4.14759E-4
0.43439	0.89594					0.55242	0.00107					15.15	4.14759E-4
0.43427	0.89282					0.55272	0.00107					15.1692	4.14759E-4
0.44541	0.76576					0.55301	0.00107					15.1891	4.14759E-4
0.44377	0.4435					0.55331	0.00107					15.2091	4.14759E-4
0.44588	0.64627					0.5535	0.00107					15.229	4.14759E-4
0.43669	1.47642					0.55361	0.00107					15.2489	4.14759E-4
0.41183	1.1746					0.55391	0.00107					15.25	4.14759E-4
0.43924	0.53576					0.5542	0.00107					15.2688	4.14759E-4
0.42484	1.46204					0.5545	0.00107					15.2887	4.14759E-4
0.43	0.7922					0.5548	0.00107					15.3087	4.14759E-4
0.43582	0.74226					0.55509	0.00107					15.3286	4.14759E-4
0.43111	0.73637					0.55539	0.00107					15.3485	4.14759E-4
0.435	0.67871					0.55569	0.00107					15.35	4.14759E-4
0.43287	1.1197					0.55599	0.00107					15.3684	4.14759E-4
0.467	0.30322					0.55628	0.00107					15.3883	4.14759E-4
0.43654	0.28068					0.5565	0.00107					15.4083	4.14759E-4
0.61156	0.24819					0.55658	0.00107					15.4282	4.14759E-4
0.46525	0.63243					0.55688	0.00107					15.4481	4.14759E-4
0.44353	0.67244					0.55718	0.00107					15.45	4.14759E-4
0.43969	0.52774					0.55747	0.00107					15.468	4.14759E-4
0.43832	1.11063					0.55777	0.00107					15.4879	4.14759E-4
0.43509	1.09355					0.55807	0.00107					15.5079	4.14759E-4
0.44493	0.67645					0.55836	0.00107					15.5278	4.14759E-4
0.4616	0.33022					0.55866	0.00107					15.5477	4.14759E-4
0.45694	0.20148					0.55896	0.00107					15.55	4.14759E-4
0.48011	0.35279					0.55926	0.00107					15.5676	4.14759E-4
0.44031	0.28409					0.5595	0.00107					15.5875	4.14759E-4
0.43858	1.0086					0.55955	0.00107					15.6075	4.14759E-4
0.41462	1.33575					0.55985	0.00107					15.6274	4.14759E-4
0.46801	0.26786					0.56015	0.00107					15.6473	4.14759E-4
0.42935	0.59962					0.56045	0.00107					15.65	4.14759E-4
0.45434	0.2796					0.56074	0.00107					15.6672	4.14759E-4
0.43812	0.38016					0.56104	0.00107					15.6871	4.14759E-4
0.41921	1.04388					0.56134	0.00107					15.7071	4.14759E-4
0.41866	1.89575					0.56164	0.00107					15.727	4.14759E-4
0.4361	0.68041					0.56193	0.00107					15.7469	4.14759E-4
0.42057	0.29078					0.56223	0.00107					15.75	4.14759E-4
0.47107	0.24251					0.5625	0.00107					15.7668	4.14759E-4
0.4428	2.28185					0.56253	0.00107					15.7867	4.14759E-4
0.45336	0.49804					0.56282	0.00107					15.8067	4.14759E-4
0.44121	0.78544					0.56312	0.00107					15.8266	4.14759E-4
0.43389	0.80721					0.56342	0.00107					15.8465	4.14759E-4
0.43474	0.43055					0.56372	0.00107					15.85	4.14759E-4
0.44904	0.70532					0.56401	0.00107					15.8664	4.14759E-4
0.45068	0.47979					0.56431	0.00107					15.8863	4.14759E-4
0.44066	0.57237					0.56461	0.00107					15.9063	4.14759E-4
0.43434	0.68451					0.56491	0.00107					15.9262	4.14759E-4
0.46145	0.27468					0.5652	0.00107					15.9461	4.14759E-4
0.44111	0.79231					0.5655	0.00107					15.95	4.14759E-4
0.49712	0.24051					0.5658	0.00107					15.966	4.14759E-4
0.43674	1.49823					0.56609	0.00107					15.9859	4.14759E-4
0.44095	0.55657					0.56639	0.00107					16.05	4.14759E-4
0.45005	1.02095					0.56669	0.00107					16.15	4.14759E-4
0.44451	0.47714					0.56699	0.00107					16.25	4.14759E-4
0.43547	1.08433					0.56728	0.00107					16.35	4.14759E-4
0.43124	0.62856					0.56758	0.00107					16.45	4.14759E-4
0.43221	0.7179					0.56788	0.00107					16.55	4.14759E-4
0.39976	0.35024					0.56818	0.00107					16.65	4.14759E-4
0.43686	1.40853					0.56847	0.00107					16.75	4.14759E-4
0.42154	0.68865					0.5685	0.00107					16.85	4.14759E-4
0.42177	0.72851					0.56877	0.00107					16.95	4.14759E-4
0.41118	0.38461					0.56907	0.00107					17.05	4.14759E-4
0.44191	0.29989					0.56936	0.00107					17.15	4.14759E-4
0.48703	0.27498					0.56966	0.00107					17.25	4.14759E-4
0.43079	0.7328					0.56996	0.00107					17.35	4.14759E-4
0.43538	0.30777					0.57026	0.00107					17.45	4.14759E-4
0.45021	0.68056					0.57055	0.00107					17.55	4.14759E-4
0.44315	0.32765					0.57085	0.00107					17.65	4.14759E-4
0.42962	0.71165					0.57115	0.00107					17.75	4.14759E-4
0.43189	0.57125					0.57145	0.00107					17.85	4.14759E-4
0.47027	0.25416					0.5715	0.00107					17.95	4.14759E-4
0.46815	0.38809					0.57174	0.00107					18.05	4.14759E-4
0.43788	1.36067					0.57204	0.00107					18.15	4.14759E-4
0.50553	0.3133					0.57234	0.00107					18.25	4.14759E-4
0.43432	2.23233					0.57264	0.00107					18.35	4.14759E-4
0.48372	0.24797					0.57323	0.00107					18.45	4.14759E-4
0.40994	0.64645					0.57353	0.00107					18.55	4.14759E-4
0.42198	0.52739					0.57382	0.00107					18.65	4.14759E-4
0.42822	0.68963					0.5745	0.00107					18.75	4.14759E-4
0.4466	0.49887					0.57472	0.00107					18.85	4.14759E-4
0.42688	0.62408					0.57501	0.00107					18.95	4.14759E-4
0.40978	0.91103					0.57531	0.00107					19.05	4.14759E-4
0.45	0.31506					0.57561	0.00107					19.15	4.14759E-4
0.44338	1.24732					0.5775	0.00107					19.25	4.14759E-4
0.43421	0.47065					0.5805	0.00107					19.35	4.14759E-4
0.43341	0.47225					0.5835	0.00107					19.45	4.14759E-4
0.42616	1.33543					0.5865	0.00107					19.55	4.14759E-4
0.41615	1.4199					0.5895	0.00107					19.65	4.14759E-4
0.46902	0.24309					0.5925	0.00107					19.75	4.14759E-4
0.41039	0.20121					0.5955	0.00107					19.85	4.14759E-4
0.46653	0.25115					0.5985	0.00107					19.95	4.14759E-4
0.45119	0.34026
0.45018	0.7606
0.438	0.948
0.40935	0.3304
0.42979	1.21184
0.46411	0.24469
0.43191	0.73614
0.43718	0.63195
0.4498	0.77675
0.47323	0.33569
0.45065	0.22384
0.43949	0.48805
0.42861	1.29155
0.42086	0.9401
0.4919	0.2794
0.43929	0.59902
0.43543	0.89533
0.42187	0.61414
0.43664	0.70093
0.42649	0.86934
0.42224	0.51611
0.43665	0.49913
0.41712	0.44121
0.41938	2.16738
0.42926	2.29087
0.46556	0.27878
0.44222	0.69366
0.44638	0.73197
0.43046	1.16611
0.44449	0.81625
0.47547	0.23113
0.44501	0.40494
0.44394	0.38777
0.46441	0.30033
0.4257	1.05052
0.40668	7.01125
0.45142	0.22462
0.43819	1.40196
0.42721	0.69437
0.43072	0.54016
0.42953	0.40756
0.43653	0.44012
0.44354	0.42054
0.43769	0.51317
0.45429	0.36288
0.41254	0.83377
0.44174	1.12826
0.43817	0.768
0.42884	0.71188
0.42729	0.24204
0.37211	0.35679
0.42715	0.8701
0.42497	0.71702
0.42813	1.08239
0.45411	0.23984
0.4314	1.1156
0.45502	0.34831
0.46639	0.30806
0.42295	0.41768
0.42485	0.82013
0.44988	0.64696
0.43927	0.84034
0.45414	0.34831
0.4355	0.98842
0.4406	0.66439
0.43915	0.32428
0.44681	0.79381
0.4323	1.1324
0.3518	0.48884
0.43297	0.96416
0.44019	0.80396
0.43132	0.70808
0.45696	0.69619
0.43414	0.78697
0.43925	0.33936
0.43537	0.78969
0.42557	0.73501
0.44464	0.58338
0.25233	0.25975
0.38501	0.32654
0.43816	0.837
0.3688	0.94467
0.43533	0.554
0.43571	0.45512
0.45315	0.33522
0.47216	0.22262
0.42052	0.70769
0.40716	1.45152
0.43673	1.07218
0.45691	0.41182
0.47801	0.2341
0.41414	0.94728
0.47943	0.29929
0.59813	0.74393
0.43014	1.77643
0.44166	0.27249
0.5087	0.20642
0.46641	0.23934
0.38221	0.89242
0.47878	0.25307
0.46942	0.2483
0.4425	1.1395
0.46195	0.20796
0.44203	0.39021
0.42289	0.8038
0.42723	1.06534
0.42622	0.57812
0.36569	0.21919
0.39146	0.67876
0.41948	1.68377
0.4088	1.22674
0.47618	0.2839
0.42116	1.88666
0.42619	0.95229
0.44267	0.63217
0.40115	0.31899
0.45132	0.27514
0.44154	0.76028
0.43578	0.24628
0.42901	0.55962
0.41856	1.14829
0.43157	1.44809
0.41348	0.34673
0.46384	0.24457
0.43638	0.2875
0.41615	0.94333
0.43138	1.19065
0.35269	0.95602
0.41004	1.35446
0.44015	0.79943
0.42648	0.48886
0.43719	0.71033
0.42789	1.03907
0.43618	1.26746
0.43329	0.47551
0.41902	0.47094
0.45357	0.33054
0.42065	4.66402
0.36352	2.40348
0.41891	1.1866
0.41153	0.41876
0.43054	0.26344
0.46584	0.21141
0.42498	1.27091
0.43595	0.37539
0.43714	0.34489
0.45473	1.03664
0.42565	0.32219
0.43304	0.59865
0.42664	0.69031
0.43336	0.69474
0.43404	1.12438
0.43567	0.33457
0.44782	0.62689
0.45	0.21852
0.43285	0.27828
0.41762	0.33543
0.45168	0.33632
0.44062	0.53885
0.43711	0.45448
0.43007	0.52173
0.36739	0.26939
0.42408	0.24691
0.44085	0.81257
0.43676	0.68487
0.44648	0.28408
0.30883	0.24862
0.45273	0.44033
0.4365	1.42447
0.39097	0.58185
0.44664	0.6312
0.43217	1.19703
0.47277	0.34298
0.44319	0.28783
0.42264	0.67519
0.43876	0.58659
0.40551	0.88797
0.44038	0.552
0.44366	0.7178
0.42105	1.90635
0.40371	0.40296
0.45393	0.67938
0.43464	0.78758
0.40053	0.31489
0.42316	0.41009
0.43914	0.35416
0.45029	0.21494
0.37925	0.22668
0.45611	0.30745
0.41878	0.93936
0.44855	0.30269
0.41443	1.91812
0.44415	0.62439
0.43602	0.64216
0.43064	0.29696
0.43916	0.97876
0.42065	0.30088
0.44156	0.69613
0.41084	1.15895
0.43336	0.95368
0.42434	0.95951
0.49295	0.22072
0.47746	0.29822
0.44237	1.28783
0.42116	0.27536
0.47375	0.33385
0.44124	0.69887
0.42977	1.12016
0.42663	2.27684
0.41688	0.37467
0.45288	0.29538
0.2016	0.74914
0.43734	0.92752
0.45909	0.47231
0.41855	0.55886
0.44833	0.5438
0.51108	0.20066
0.46072	0.40416
0.43013	0.81461
0.42279	0.61425
0.37863	2.37288
0.44663	0.45756
0.43164	0.97302
0.45578	0.26297
0.42692	0.41616
0.39631	1.2428
0.44655	0.41861
0.40451	1.40049
0.4545	0.22983
0.42105	0.29475
0.42832	1.78281
0.44444	0.25435
0.42898	0.873
0.43729	0.33389
0.4152	0.87838
0.44926	0.21057
0.3895	0.20123
0.44109	0.38137
0.4531	0.26906
0.43986	0.82253
0.45094	0.44796
0.4153	0.40879
0.42542	0.63089
0.47318	0.29644
0.44489	0.91703
0.43452	0.41256
0.43607	0.43118
0.45868	0.67487
0.43758	0.88354
0.47884	0.26715
0.39837	0.26463
0.44373	0.85549
0.43003	0.87059
0.42716	0.69129
0.43588	1.91303
0.45666	0.37914
0.41694	0.35697
0.45434	0.24365
0.436	1.01556
0.4574	0.40197
0.45564	0.68457
0.44996	0.35241
0.43269	1.22971
0.46787	0.21215
0.44603	0.32723
0.43107	0.37498
0.38602	0.7767
0.42498	0.54639
0.48337	0.35131
0.41887	0.52932
0.45358	0.64919
0.42988	1.51183
0.45131	0.31714
0.4026	0.28018
0.44476	0.32595
0.43175	0.45917
0.44397	0.75239
0.44969	1.06968
0.4351	1.49921
0.44386	0.41732
0.25793	0.24967
0.46175	0.34407
0.4453	0.30406
0.40911	0.43538
0.43359	0.92611
0.42441	0.73628
0.439	0.60302
0.42625	0.35484
0.43967	0.9606
0.43853	0.26066
0.45859	0.21916
0.43416	0.55849
0.43944	1.39535
0.46252	0.21257
0.43153	0.2798
0.36904	0.66861
0.46096	0.38335
0.40614	0.49856
0.42144	0.34601
0.43407	0.60266
0.4073	0.45751
0.4286	0.3806
0.41645	0.73601
0.43139	1.94887
0.43848	1.0261
0.4434	0.55898
0.42815	1.16521
0.44381	0.28812
0.43264	0.29186
0.44085	0.2538
0.44976	0.20608
0.4303	0.64367
0.45279	0.49544
0.38198	1.3553
0.44939	0.36962
0.46383	0.83594
0.43202	1.00424
0.41388	2.27591
0.43398	0.39932
0.44763	0.29587
0.44354	0.21544
0.42332	2.45193
0.49022	0.22449
0.44776	0.32459
0.43138	2.09071
0.47556	0.25662
0.43053	0.38334
0.43691	0.26687
0.44084	0.41562
0.4291	0.32078
0.4229	0.43185
0.44299	0.8003
0.43537	0.5194
0.44287	0.20391
0.42564	0.29081
0.42285	0.58431
0.42096	1.57888
0.43293	0.83162
0.45282	0.23928
0.45063	0.54735
0.42712	0.99926
0.43077	0.88818
0.43765	0.38904
0.43114	0.95598
0.42976	0.94225
0.43774	0.27431
0.42673	0.85015
0.41821	0.29226
0.40269	1.97786
0.42172	0.84012
0.43696	0.25549
0.45428	0.28069
0.36252	1.31969
0.40255	0.48771
0.44601	0.62835
0.47621	0.20193
0.44476	0.47277
0.42641	0.8253
0.43783	0.84709
0.44754	0.60606
0.4242	0.62329
0.43245	0.73618
0.43478	0.56566
0.48004	0.2142
0.43241	0.99518
0.48038	0.21143
0.45378	0.2559
0.43112	1.13435
0.49513	0.20384
0.44397	0.35323
0.4382	1.05911
0.40382	2.12342
0.42703	0.57541
0.43849	0.38819
0.43341	0.47987
0.44014	0.29541
0.42924	0.40034
0.45404	0.25017
0.43739	0.52972
0.44503	0.96614
0.45446	0.47934
0.43367	0.75489
0.43073	2.07091
0.43836	0.75874
0.45238	0.25522
0.43677	0.45177
0.41715	0.34885
0.42651	1.02801
0.45781	0.20645
0.45099	1.00785
0.44417	0.7124
0.39754	0.29158
0.43223	0.61107
0.43377	1.02985
0.45444	0.49242
0.45429	0.3272
0.42016	0.46021
0.44381	0.30932
0.43257	0.65639
0.41391	0.25193
0.41227	0.81331
0.44052	0.36677
0.45623	0.34293
0.46673	0.23196
0.4229	1.20593
0.43022	0.24651
0.43537	0.42828
0.43555	0.63372
0.47863	0.21899
0.45542	0.29812
0.43947	0.48045
0.43083	1.56904
0.44937	1.3391
0.42369	0.64619
0.4292	0.69582
0.43884	0.50008
0.43213	0.64114
0.38934	1.17023
0.43167	0.7203
0.45402	0.29136
0.4376	0.42198
0.42145	2.6682
0.45062	0.47263
0.43912	1.57135
0.43509	0.65412
0.44099	1.21433
0.44682	0.90767
0.43143	0.44811
0.43397	0.51942
0.42896	1.2437
0.46206	0.40759
0.43044	1.47466
0.41491	0.57357
0.46374	0.27919
0.38923	0.24432
0.43727	1.80419
0.43184	1.59236
0.43236	0.75543
0.42982	0.57966
0.40059	3.35608
0.42646	0.29904
0.42798	1.27067
0.43535	0.9141
0.45886	0.34077
0.46049	0.50773
0.41186	0.71603
0.4466	0.29175
0.45393	0.30767
0.43695	0.61506
0.40836	0.6002
0.43515	0.49873
0.39697	0.33942
0.42976	0.78598
0.4231	0.80845
0.31078	0.4483
0.43579	1.69781
0.43061	1.02323
0.4012	0.30017
0.44914	0.38708
0.42658	1.87786
0.43663	0.42815
0.42611	0.98307
0.42667	1.30092
0.36468	0.26661
0.4281	0.95554
0.4236	0.58782
0.45823	0.2807
0.44513	0.6829
0.41564	0.35105
0.43385	0.26711
0.43767	0.57983
0.4364	1.55518
0.45208	0.9067
0.40248	1.04851
0.46046	0.3478
0.46597	0.26317
0.45954	0.23168
0.43827	0.7867
0.42491	0.46261
0.40893	0.71863
0.43785	0.93851
0.4203	0.8568
0.46802	0.28039
0.42594	0.33006
0.04417	1.48815
0.437	1.53229
0.44014	1.84861
0.43326	0.26657
0.42912	1.48219
0.42789	1.72761
0.45123	0.53716
0.41883	0.58396
0.46719	0.23647
0.40267	1.21191
0.42367	1.87973
0.4392	0.24871
0.46998	0.29
0.43896	1.46857
0.4334	0.30384
0.44432	1.71141
0.42501	0.57994
0.47528	0.26469
0.42785	1.07879
0.43638	0.30896
0.46297	0.36718
0.4461	0.38737
0.44336	1.58308
0.45108	0.5045
0.41881	0.55508
0.45564	0.41541
0.4584	0.43107
0.47343	0.27007
0.45167	0.41618
0.43768	0.99944
0.42304	1.12716
0.43388	0.89823
0.43989	1.64219
0.44324	0.63578
0.42032	0.63915
0.42903	2.01156
0.47276	0.24001
0.43928	0.64363
0.46545	0.23945
0.45114	0.6828
0.42222	0.98878
0.44942	1.06357
0.42833	0.60701
0.47867	0.24555
0.43271	0.43071
0.43024	0.71668
0.43014	2.09597
0.44338	0.36702
0.46458	0.32234
0.44597	0.25854
0.42982	0.69806
0.42954	0.86673
0.43222	0.36719
0.45724	0.21607
0.437	0.55474
0.4234	0.85051
0.45145	0.49312
0.43586	0.63262
0.43717	1.34322
0.41522	0.24706
0.45978	0.25561
0.41954	0.80872
0.41694	0.51077
0.45464	0.2967
0.43485	0.84893
0.41163	0.51169
0.44386	0.39252
0.45006	0.52438
0.41993	0.93958
0.45205	0.45643
0.40931	1.15727
0.43643	1.40844
0.4413	0.23676
0.42765	0.43911
0.42971	0.65686
0.41998	0.40386
0.43578	0.3142
0.46397	0.3279
0.43812	0.29076
0.15981	0.67352
0.43413	2.6226
0.44844	0.27036
0.42455	1.70741
0.42408	1.44795
0.43275	0.56156
0.44729	0.25045
0.43922	1.04244
0.39205	0.2225
0.44076	0.70366
0.42551	0.81184
0.43447	2.10595
0.42109	0.63284
0.44693	0.42077
0.45184	0.44119
0.48115	0.37242
0.44106	0.92307
0.42705	0.97217
0.40617	0.77369
0.44114	0.80689
0.43664	1.32716
0.47297	0.23398
0.42766	0.61621
0.45607	0.23574
0.42836	1.22369
0.46454	0.26889
0.42371	2.27522
0.46148	0.32447
0.41309	0.28285
0.42832	1.90787
0.42552	1.11107
0.45356	0.40742
0.43434	2.23947
0.45127	0.28323
0.47848	0.23666
0.42698	1.54137
0.42897	0.54817
0.43134	1.3643
0.41536	1.46893
0.43095	0.31794
0.42394	1.01428
0.43367	0.80547
0.45297	0.46749
0.4136	0.82806
0.42342	0.34924
0.43141	0.50373
0.45957	0.27156
0.45869	0.4825
0.46118	0.46861
0.42834	0.41886
0.43213	1.54179
0.43173	1.49513
0.4423	0.20356
0.48441	0.25028
0.42681	0.35977
0.43393	0.90678
0.43845	1.10527
0.44629	0.50128
0.43565	0.98806
0.45674	0.37124
0.4455	0.5783
0.37534	1.34291
0.43566	1.10462
0.48883	0.22727
0.42823	1.58395
0.4537	0.29969
0.43976	0.81698
0.44186	0.22898
0.41666	2.66395
0.45316	0.68764
0.44676	0.43603
0.44071	1.72327
0.42707	0.6383
0.44484	0.46836
0.46188	0.24315
0.45692	0.49662
0.42437	2.43803
0.43934	1.03504
0.46695	0.27986
0.45081	0.44458
0.4334	0.91631
0.41429	0.70207
0.42791	1.11153
0.4437	1.16192
0.45782	0.21148
0.44229	0.33575
0.41973	0.5554
0.45281	0.28687
0.4221	0.85444
0.46895	0.24865
0.42907	0.67044
0.43029	1.60517
0.42525	3.68708
0.43169	0.96119
0.44483	0.81265
0.43159	1.28319
0.45383	0.30023
0.42038	1.51915
0.42274	0.36073
0.44886	0.52404
0.42963	0.26728
0.43318	0.75224
0.40059	0.56332
0.44116	0.47075
0.45334	0.25566
0.43674	0.63526
0.44165	0.99194
0.42854	0.78828
0.42718	0.40888
0.413	0.25965
0.44593	0.41069
0.42664	0.72057
0.46205	0.2201
0.42853	0.85123
0.4259	3.46764
0.42851	0.96876
0.43331	0.96477
0.44279	0.59661
0.45577	0.31475
0.44111	2.0163
0.48951	0.23919
0.4371	0.33922
0.42847	1.15708
0.41611	0.95521
0.40191	0.23887
0.43231	0.35161
0.43121	0.29666
0.43572	1.33498
0.42848	0.42667
0.4347	1.65086
0.45555	0.39414
0.41833	1.33646
0.42933	0.38784
0.45636	0.20699
0.4256	1.01451
0.45808	0.33148
0.45442	0.28041
0.43102	1.04122
0.42686	0.25454
0.43001	0.70331
0.43461	1.11201
0.42939	0.74891
0.44155	0.56378
0.44033	0.89215
0.42393	0.75439
0.42364	1.40924
0.4304	0.85234
0.42783	1.73663
0.42087	0.71031
0.43646	0.72942
0.40791	0.75566
0.43359	0.84846
0.43441	0.73588
0.45979	0.32338
0.42188	1.50202
0.44099	0.43654
0.43418	0.2678
0.44627	0.41448
0.43329	0.89052
0.45007	0.38782
0.44031	0.62809
0.45912	0.27567
0.44432	0.82045
0.43533	0.72441
0.43181	0.46094
0.42416	1.07097
0.43384	0.69744
0.42652	1.16414
0.42527	1.33853
0.4323	1.14798
0.45701	0.53668
0.40913	0.3719
0.44948	0.40799
0.45513	0.20906
0.43506	0.25023
0.44122	0.67699
0.45941	0.30349
0.44208	0.55131
0.42451	0.92431
0.45668	0.38186
0.44282	0.36631
0.42995	0.69141
0.48992	0.21952
0.42683	0.97513
0.43334	0.61131
0.42693	0.68096
0.41421	1.95894
0.41875	0.74379
0.46557	0.54282
0.46954	0.27525
0.46296	0.21976
0.47917	0.21317
0.43113	0.76033
0.44697	0.48269
0.45797	0.33479
0.46404	0.20377
0.4016	0.27462
0.47768	0.20114
0.4284	1.29563
0.42291	0.64212
0.43123	1.40759
0.44867	0.28569
0.45302	0.24109
0.45501	0.31574
0.44664	0.56281
0.43655	0.39969
0.41537	0.74713
0.45275	0.75588
0.37879	0.82294
0.42289	0.89096
0.42466	1.54483
0.46329	0.42049
0.41929	0.48341
0.43772	0.30551
0.43147	2.22765
0.42404	2.39139
0.43534	0.99308
0.45474	0.30638
0.43784	0.85827
0.45837	0.36396
0.42727	0.53969
0.42262	1.0504
0.44216	0.72047
0.44731	0.3138
0.42271	1.69567
0.43043	0.29112
0.43058	1.27947
0.3824	0.57078
0.44941	0.36363
0.46303	0.23267
0.42521	0.59634
0.43103	0.74068
0.42198	0.24467
0.43968	0.2945
0.4332	0.9408
0.43251	0.62749
0.45763	0.36747
0.45991	0.21833
0.42767	1.82032
0.43983	0.28462
0.47079	0.23923
0.44866	0.25643
0.43296	0.39243
0.43602	0.40828
0.43319	0.86023
0.43495	0.66927
0.46444	0.2238
0.43534	0.24887
0.44344	0.27165
0.486	0.20093
0.41973	0.87978
0.4293	0.48953
0.49561	0.20698
0.43687	0.63927
0.45025	0.24302
0.45741	0.4509
0.40127	0.41153
0.42801	1.29149
0.43626	0.81294
0.42168	0.88118
0.43366	0.8935
0.45277	0.26765
0.44402	0.39961
0.44978	0.52778
0.44494	0.75972
0.44185	0.62352
0.44164	0.46418
0.41976	1.2788
0.45468	0.5492
0.43651	0.24658
0.42636	0.28134
0.43312	0.59579
0.43119	0.33931
0.44399	0.37222
0.42241	0.93523
0.44802	0.32886
0.43954	0.21143
0.41852	1.61994
0.44176	0.49649
0.44723	0.70061
0.41535	0.60743
0.43678	0.24421
0.45524	0.31046
0.44068	1.0599
0.42453	0.39639
0.45827	0.26222
0.45136	0.74071
0.43825	1.32614
0.37867	0.9045
0.34832	0.23401
0.42546	1.14376
0.42492	0.5842
0.47232	0.23633
0.42595	0.40284
0.41274	1.20295
0.44168	0.46205
0.46572	0.21993
0.45171	0.72595
0.47218	0.31987
0.43266	0.32075
0.51127	0.20369
0.43192	4.2632
0.44629	0.22415
0.38686	0.32651
0.40123	0.56155
0.43806	0.97483
0.45827	0.98344
0.42541	0.24324
0.42275	0.96835
0.44483	0.39609
0.51286	0.22463
0.44584	0.39618
0.43154	0.83624
0.44245	1.13807
0.4292	0.39115
0.42621	0.94166
0.43122	0.39426
0.4381	0.49776
0.39548	1.09851
0.47915	1.7766
0.42718	1.20225
0.4395	1.30396
0.42201	0.66629
0.43381	0.61716
0.48216	0.21609
0.50326	0.24443
0.43521	1.53582
0.42458	1.58025
0.44337	0.89133
0.44546	1.00456
0.44728	0.49767
0.43101	0.28736
0.4319	0.79642
0.36232	0.45335
0.42377	1.44449
0.45607	0.3043
0.43164	0.51964
0.43312	1.01964
0.43538	1.81146
0.41877	1.29488
0.46821	0.27965
0.47217	0.20599
0.43634	1.86485
0.40242	0.41467
0.4453	1.22904
0.43138	0.61828
0.44682	0.48875
0.47503	0.21618
0.42547	1.74432
0.44032	0.34811
0.44578	0.58998
0.43694	0.8105
0.42647	1.04492
0.42204	0.78407
0.46524	0.21168
0.37036	0.42034
0.43792	0.93919
0.45262	0.58867
0.43019	0.60441
0.43219	0.88911
0.44957	0.36722
0.42008	0.62106
0.43904	0.34769
0.42374	1.00792
0.4309	1.53564
0.43047	0.9882
0.42704	0.53444
0.42211	1.39894
0.46654	0.34419
0.4348	1.11653
0.42403	0.93
0.44761	0.23957
0.38299	0.31915
0.43422	1.22105
0.43892	0.31208
0.43047	0.81085
0.4368	0.37711
0.44104	0.70441
0.41048	1.2931
0.47268	0.30801
0.46991	0.20386
0.46893	0.31989
0.43222	0.83576
0.45849	0.33396
0.45627	0.92518
0.43333	1.42005
0.4226	1.57152
0.44518	0.45301
0.44679	0.31221
0.4754	0.26229
0.42658	1.28162
0.45143	0.36007
0.45479	0.39329
0.42608	0.36539
0.44285	0.85086
0.44234	0.41649
0.42779	0.29526
0.42389	0.89647
0.42908	0.77524
0.45612	0.47939
0.44171	1.3872
0.46051	0.20016
0.4213	1.68635
0.45029	0.37827
0.42889	0.54962
0.43871	0.7916
0.42007	0.56211
0.43161	0.56416
0.45481	0.44934
0.42644	0.98812
0.43037	0.57305
0.42227	0.63262
0.41931	0.25211
0.39863	0.21332
0.43147	0.21856
0.41735	0.43524
0.45266	0.76708
0.43265	0.49034
0.41093	2.91147
0.43822	0.84806
0.45022	0.59857
0.45956	0.25537
0.48931	0.29276
0.43543	0.20654
0.43542	2.10392
0.45948	0.53192
0.44586	0.25997
0.44449	0.89639
0.37265	0.34411
0.42336	1.1879
0.44471	0.33454
0.45783	0.36471
0.43269	0.89344
0.44818	0.27114
0.43289	0.60292
[truncated: 57,377 more rows]

## Sheet: Fig. 5c
H31-10R2(Cit) Scatter			BlockDepth histogram			Gaussian-fitting for BlockDepth			Restime histogram			LogNormal-fitting for Restime
BlockDepth	Restime (ms)		BlockDepth	Relative counts		BlockDepth	Relative counts		Restime (ms)	Relative counts		Restime (ms)	Relative counts
0.45314	1.33581		0.3015	0		0.3015	0.00127		0.05	0		0.05	0.00188
0.47219	0.28504		0.3045	0		0.30209	0.00127		0.15	0		0.06992	0.00606
0.45066	0.68531		0.3075	0		0.30239	0.00127		0.25	0.13947		0.08984	0.01326
0.4242	0.778		0.3105	0		0.30269	0.00127		0.35	0.11328		0.10976	0.02289
0.47488	0.48641		0.3135	0		0.30299	0.00127		0.45	0.09925		0.12968	0.03397
0.4593	2.37156		0.3165	6.13535E-5		0.30328	0.00127		0.55	0.08594		0.1496	0.04559
0.4486	0.45836		0.3195	1.22707E-4		0.30358	0.00127		0.65	0.07034		0.15	0.04582
0.46643	0.2848		0.3225	0		0.30388	0.00127		0.75	0.06798		0.16952	0.05699
0.44904	0.54877		0.3255	1.22707E-4		0.30418	0.00127		0.85	0.05389		0.18944	0.06768
0.45899	0.86271		0.3285	6.13535E-5		0.30447	0.00127		0.95	0.04736		0.20936	0.07731
0.46449	0.74474		0.3315	6.13535E-5		0.3045	0.00127		1.05	0.04095		0.22928	0.08571
0.44921	1.07181		0.3345	1.8406E-4		0.30477	0.00127		1.15	0.03738		0.2492	0.09281
0.50189	1.53196		0.3375	1.22707E-4		0.30507	0.00127		1.25	0.02897		0.25	0.09307
0.4698	2.04983		0.3405	1.22707E-4		0.30536	0.00127		1.35	0.02746		0.26912	0.09864
0.4549	2.30625		0.3435	2.45414E-4		0.30566	0.00127		1.45	0.02383		0.28904	0.10324
0.47497	0.25577		0.3465	1.8406E-4		0.30596	0.00127		1.55	0.01948		0.30896	0.10672
0.44857	0.70027		0.3495	3.06767E-4		0.30626	0.00127		1.65	0.01814		0.32888	0.10917
0.47117	0.37374		0.3525	3.68121E-4		0.30655	0.00127		1.75	0.01554		0.3488	0.11072
0.50377	0.21356		0.3555	1.8406E-4		0.30685	0.00127		1.85	0.01403		0.35	0.11079
0.44993	0.67567		0.3585	1.8406E-4		0.30715	0.00127		1.95	0.01064		0.36872	0.11147
0.45837	0.32366		0.3615	4.90828E-4		0.30745	0.00127		2.05	0.01016		0.38864	0.11153
0.49704	0.22489		0.3645	3.68121E-4		0.3075	0.00127		2.15	0.00816		0.40856	0.111
0.47914	0.26209		0.3675	1.8406E-4		0.30774	0.00127		2.25	0.00865		0.42848	0.10998
0.45659	1.93666		0.3705	6.13535E-4		0.30804	0.00127		2.35	0.00738		0.4484	0.10853
0.45961	0.37454		0.3735	4.90828E-4		0.30834	0.00127		2.45	0.00629		0.45	0.1084
0.4233	1.31966		0.3765	5.52181E-4		0.30864	0.00127		2.55	0.00496		0.46832	0.10674
0.46937	0.35626		0.3795	6.74888E-4		0.30893	0.00127		2.65	0.00393		0.48824	0.10467
0.47042	0.78399		0.3825	5.52181E-4		0.30923	0.00127		2.75	0.0046		0.50816	0.10237
0.4725	0.29913		0.3855	8.58948E-4		0.30953	0.00127		2.85	0.00442		0.52808	0.0999
0.45127	0.78551		0.3885	8.58948E-4		0.30982	0.00127		2.95	0.00357		0.548	0.0973
0.44627	0.50232		0.3915	0.00104		0.31012	0.00127		3.05	0.00321		0.55	0.09703
0.46523	0.34659		0.3945	0.00104		0.31042	0.00127		3.15	0.00187		0.56792	0.0946
0.46762	1.08702		0.3975	0.00135		0.3105	0.00127		3.25	0.00127		0.58784	0.09184
0.46137	2.95412		0.4005	0.00141		0.31072	0.00127		3.35	0.00133		0.60776	0.08904
0.45453	0.91982		0.4035	0.00104		0.31101	0.00127		3.45	0.00169		0.62768	0.08622
0.46461	0.66205		0.4065	0.0019		0.31131	0.00127		3.55	0.00163		0.6476	0.08341
0.4419	0.67391		0.4095	0.00215		0.31161	0.00127		3.65	0.00121		0.65	0.08307
0.42555	1.02166		0.4125	0.00215		0.31191	0.00127		3.75	0.00121		0.66752	0.08062
0.45491	0.27074		0.4155	0.00282		0.3122	0.00127		3.85	0.00109		0.68744	0.07785
0.44873	1.34371		0.4185	0.00245		0.3125	0.00127		3.95	0.00115		0.70736	0.07513
0.45612	0.73149		0.4215	0.0035		0.3128	0.00127		4.05	0.00127		0.72728	0.07246
0.45268	0.65513		0.4245	0.00368		0.31309	0.00127		4.15	5.44333E-4		0.7472	0.06985
0.41256	1.54723		0.4275	0.00491		0.31339	0.00127		4.25	6.04814E-4		0.75	0.06949
0.4418	2.98754		0.4305	0.00583		0.3135	0.00127		4.35	3.62889E-4		0.76712	0.0673
0.46795	0.4407		0.4335	0.00871		0.31369	0.00127		4.45	4.83851E-4		0.78704	0.06481
0.45602	0.90712		0.4365	0.01362		0.31399	0.00127		4.55	3.62889E-4		0.80696	0.0624
0.48054	0.20998		0.4395	0.02019		0.31428	0.00127		4.65	2.41926E-4		0.82688	0.06006
0.44624	1.47392		0.4425	0.02749		0.31458	0.00127		4.75	4.2337E-4		0.8468	0.05779
0.45428	1.30403		0.4455	0.04215		0.31488	0.00127		4.85	2.41926E-4		0.85	0.05743
0.44525	5.15421		0.4485	0.06565		0.31518	0.00127		4.95	2.41926E-4		0.86672	0.05559
0.47437	0.48489		0.4515	0.08589		0.31547	0.00127		5.05	1.20963E-4		0.88664	0.05347
0.45235	1.79281		0.4545	0.10234		0.31577	0.00127		5.15	3.62889E-4		0.90656	0.05142
0.44913	0.60283		0.4575	0.10448		0.31607	0.00127		5.25	1.20963E-4		0.92648	0.04944
0.45395	0.39127		0.4605	0.10228		0.31636	0.00127		5.35	1.81444E-4		0.9464	0.04754
0.39963	0.26978		0.4635	0.08565		0.3165	0.00127		5.45	1.20963E-4		0.95	0.0472
0.46796	1.2478		0.4665	0.0673		0.31666	0.00127		5.55	6.04814E-5		0.96632	0.0457
0.46546	0.24761		0.4695	0.05154		0.31696	0.00127		5.65	1.81444E-4		0.98624	0.04394
0.43872	2.24416		0.4725	0.04025		0.31726	0.00127		5.75	1.20963E-4		1.00616	0.04224
0.48081	0.21458		0.4755	0.03123		0.31755	0.00127		5.85	6.04814E-5		1.02608	0.0406
0.47593	0.31095		0.4785	0.02227		0.31785	0.00127		5.95	6.04814E-5		1.046	0.03903
0.45916	0.45653		0.4815	0.01896		0.31815	0.00127		6.05	1.20963E-4		1.05	0.03872
0.46284	0.38601		0.4845	0.01436		0.31845	0.00127		6.15	6.04814E-5		1.06592	0.03752
0.4415	0.60726		0.4875	0.00957		0.31874	0.00127		6.25	0		1.08584	0.03607
0.44371	4.05425		0.4905	0.00908		0.31904	0.00127		6.35	6.04814E-5		1.10576	0.03468
0.45654	3.51019		0.4935	0.00902		0.31934	0.00127		6.45	0		1.12568	0.03334
0.45723	0.38307		0.4965	0.00632		0.3195	0.00127		6.55	1.20963E-4		1.1456	0.03206
0.46824	0.4531		0.4995	0.00393		0.31964	0.00127		6.65	6.04814E-5		1.15	0.03178
0.45285	0.95907		0.5025	0.00337		0.31993	0.00127		6.75	1.81444E-4		1.16552	0.03083
0.44519	1.66683		0.5055	0.00344		0.32023	0.00127		6.85	0		1.18544	0.02965
0.454	0.75881		0.5085	0.0016		0.32053	0.00127		6.95	2.41926E-4		1.20536	0.02852
0.44877	0.46198		0.5115	0.0019		0.32082	0.00127		7.05	1.20963E-4		1.22528	0.02743
0.46052	1.26312		0.5145	6.74888E-4		0.32112	0.00127		7.15	6.04814E-5		1.2452	0.02639
0.44682	2.72292		0.5175	7.36241E-4		0.32142	0.00127		7.25	6.04814E-5		1.25	0.02614
0.47458	0.2582		0.5205	6.74888E-4		0.32172	0.00127		7.35	6.04814E-5		1.26512	0.02539
0.45734	1.70048		0.5235	6.13535E-4		0.32201	0.00127		7.45	0		1.28504	0.02443
0.44542	3.84968		0.5265	6.13535E-4		0.32231	0.00127		7.55	0		1.30495	0.02351
0.34671	3.66568		0.5295	2.45414E-4		0.3225	0.00127		7.65	1.20963E-4		1.32487	0.02262
0.47294	0.34287		0.5325	1.22707E-4		0.32261	0.00127		7.75	6.04814E-5		1.34479	0.02178
0.44683	0.89164		0.5355	3.06767E-4		0.32291	0.00127		7.85	6.04814E-5		1.35	0.02156
0.49276	0.34211		0.5385	6.13535E-5		0.3232	0.00127		7.95	0		1.36471	0.02096
0.44167	0.57795		0.5415	1.22707E-4		0.3235	0.00127		8.05	6.04814E-5		1.38463	0.02019
0.44823	0.61689		0.5445	1.22707E-4		0.3238	0.00127		8.15	0		1.40455	0.01944
0.44774	2.83083		0.5475	6.13535E-5		0.32409	0.00127		8.25	0		1.42447	0.01872
0.46304	0.20551		0.5505	6.13535E-5		0.32439	0.00127		8.35	6.04814E-5		1.44439	0.01803
0.45299	0.67094		0.5535	1.22707E-4		0.32469	0.00127		8.45	0		1.45	0.01785
0.47635	0.39524		0.5565	6.13535E-5		0.32499	0.00127		8.55	0		1.46431	0.01737
0.48181	1.26162		0.5595	0		0.32528	0.00127		8.65	0		1.48423	0.01674
0.44785	2.15441		0.5625	0		0.3255	0.00127		8.75	0		1.50415	0.01613
0.44597	0.66305		0.5655	1.22707E-4		0.32558	0.00127		8.85	0		1.52407	0.01555
0.44249	1.83609		0.5685	3.68121E-4		0.32588	0.00127		8.95	6.04814E-5		1.54399	0.01499
0.45735	0.88962		0.5715	0		0.32618	0.00127		9.05	0		1.55	0.01483
0.48002	0.26245		0.5745	0		0.32647	0.00127		9.15	0		1.56391	0.01445
0.44086	0.95004		0.5775	1.22707E-4		0.32677	0.00127		9.25	0		1.58383	0.01394
0.45256	0.80064		0.5805	1.8406E-4		0.32707	0.00127		9.35	6.04814E-5		1.60375	0.01344
0.44053	0.32168		0.5835	0		0.32736	0.00127		9.45	0		1.62367	0.01297
0.45706	0.73586		0.5865	1.8406E-4		0.32766	0.00127		9.55	0		1.64359	0.01251
0.45242	0.83082		0.5895	1.8406E-4		0.32796	0.00127		9.65	0		1.65	0.01237
0.44441	0.83895		0.5925	2.45414E-4		0.32826	0.00127		9.75	0		1.66351	0.01207
0.44712	0.73053		0.5955	6.13535E-5		0.3285	0.00127		9.85	0		1.68343	0.01165
0.44755	1.14313		0.5985	1.8406E-4		0.32855	0.00127		9.95	0		1.70335	0.01125
0.46702	1.01887					0.32885	0.00127		10.05	0		1.72327	0.01086
0.46017	0.3406					0.32915	0.00127		10.15	0		1.74319	0.01049
0.46378	0.43079					0.32945	0.00127		10.25	6.04814E-5		1.75	0.01036
0.45678	0.95542					0.32974	0.00127		10.35	0		1.76311	0.01013
0.46783	1.02993					0.33004	0.00127		10.45	0		1.78303	0.00978
0.43483	0.78998					0.33034	0.00127		10.55	0		1.80295	0.00945
0.44857	1.53647					0.33064	0.00127		10.65	0		1.82287	0.00913
0.43913	0.73463					0.33093	0.00127		10.75	0		1.84279	0.00883
0.47018	1.74785					0.33123	0.00127		10.85	0		1.85	0.00872
0.45962	0.96247					0.3315	0.00127		10.95	6.04814E-5		1.86271	0.00853
0.45238	1.38673					0.33153	0.00127		11.05	0		1.88263	0.00825
0.44248	0.78401					0.33182	0.00127		11.15	0		1.90255	0.00798
0.46258	1.73221					0.33212	0.00127		11.25	0		1.92247	0.00772
0.47239	0.3708					0.33242	0.00127		11.35	0		1.94239	0.00746
0.4522	2.07879					0.33272	0.00127		11.45	0		1.95	0.00737
0.45979	1.34623					0.33301	0.00127		11.55	0		1.96231	0.00722
0.46277	0.70995					0.33331	0.00127		11.65	0		1.98223	0.00699
0.49168	0.26764					0.33361	0.00127		11.75	0		2.00215	0.00676
0.46065	0.3985					0.33391	0.00127		11.85	0		2.02207	0.00655
0.47077	0.61585					0.3342	0.00127		11.95	0		2.04199	0.00634
0.43463	1.68386					0.3345	0.00127		12.05	6.04814E-5		2.05	0.00626
0.4419	1.15038					0.3348	0.00127		12.15	0		2.06191	0.00614
0.45367	0.80262					0.33509	0.00127		12.25	0		2.08183	0.00594
0.44887	0.74655					0.33539	0.00127		12.35	0		2.10175	0.00576
0.44769	2.53426					0.33569	0.00127		12.45	0		2.12167	0.00558
0.44159	0.73487					0.33599	0.00127		12.55	6.04814E-5		2.14159	0.00541
0.44714	0.95557					0.33628	0.00127		12.65	0		2.15	0.00533
0.45074	4.02052					0.33658	0.00127		12.75	0		2.16151	0.00524
0.42824	2.36567					0.33688	0.00127		12.85	0		2.18143	0.00508
0.46773	0.52367					0.33718	0.00127		12.95	0		2.20135	0.00492
0.453	0.69378					0.33747	0.00127		13.05	0		2.22127	0.00478
0.45293	0.27621					0.3375	0.00127		13.15	0		2.24119	0.00463
0.45707	1.3181					0.33777	0.00127		13.25	0		2.25	0.00457
0.45385	0.72321					0.33807	0.00127		13.35	0		2.26111	0.00449
0.44951	3.64738					0.33836	0.00127		13.45	0		2.28103	0.00436
0.43973	0.86781					0.33866	0.00127		13.55	0		2.30095	0.00423
0.43699	0.82653					0.33896	0.00127		13.65	0		2.32087	0.00411
0.45374	0.7942					0.33926	0.00127		13.75	0		2.34079	0.00399
0.44052	2.43523					0.33955	0.00127		13.85	0		2.35	0.00393
0.48409	0.21728					0.33985	0.00127		13.95	0		2.36071	0.00387
0.46302	0.29434					0.34015	0.00127		14.05	0		2.38063	0.00376
0.46914	0.42463					0.34045	0.00127		14.15	0		2.40055	0.00365
0.42922	0.40275					0.3405	0.00127		14.25	0		2.42047	0.00355
0.48307	0.35313					0.34074	0.00127		14.35	0		2.44039	0.00345
0.47071	0.24364					0.34104	0.00127		14.45	0		2.45	0.0034
0.45008	1.17422					0.34134	0.00127		14.55	6.04814E-5		2.46031	0.00335
0.44342	0.55129					0.34164	0.00127		14.65	0		2.48023	0.00326
0.43707	0.24968					0.34193	0.00127		14.75	0		2.50015	0.00317
0.44221	1.064					0.34223	0.00127		14.85	6.04814E-5		2.52007	0.00308
0.46619	0.20661					0.34253	0.00127		14.95	6.04814E-5		2.53999	0.00299
0.46123	0.36591					0.34282	0.00127		15.05	0		2.55	0.00295
0.48481	0.20201					0.34312	0.00127		15.15	0		2.55991	0.00291
0.4403	0.45668					0.34342	0.00127		15.25	0		2.57983	0.00283
0.49599	0.20546					0.3435	0.00127		15.35	0		2.59975	0.00276
0.45411	2.236					0.34372	0.00127		15.45	0		2.61967	0.00268
0.45491	0.24048					0.34401	0.00127		15.55	0		2.63959	0.00261
0.47214	0.68679					0.34431	0.00127		15.65	0		2.65	0.00258
0.47884	0.31054					0.34461	0.00127		15.75	0		2.65951	0.00254
0.44955	1.74774					0.34491	0.00127		15.85	0		2.67943	0.00248
0.07772	2.38344					0.3452	0.00127		15.95	0		2.69935	0.00241
0.44365	0.43384					0.3455	0.00127		16.05	0		2.71927	0.00235
0.44579	1.51827					0.3458	0.00127		16.15	0		2.73919	0.00229
0.45875	3.10343					0.34609	0.00127		16.25	0		2.75	0.00226
0.45232	3.95169					0.34639	0.00127		16.35	0		2.75911	0.00223
0.45971	1.18733					0.3465	0.00127		16.45	0		2.77903	0.00218
0.4435	0.46291					0.34669	0.00127		16.55	0		2.79895	0.00212
0.46858	0.29368					0.34699	0.00127		16.65	0		2.81887	0.00207
0.4642	0.50443					0.34728	0.00127		16.75	0		2.83879	0.00202
0.46095	2.0061					0.34758	0.00127		16.85	0		2.85	0.00199
0.46669	0.76426					0.34788	0.00127		16.95	0		2.85871	0.00197
0.43745	0.41268					0.34818	0.00127		17.05	0		2.87863	0.00192
0.44392	0.60846					0.34847	0.00127		17.15	0		2.89855	0.00188
0.45939	1.72966					0.34877	0.00127		17.25	0		2.91847	0.00183
0.47199	0.4626					0.34907	0.00127		17.35	0		2.93839	0.00179
0.43763	0.24737					0.34936	0.00127		17.45	0		2.95	0.00176
0.45002	0.95236					0.3495	0.00127		17.55	0		2.95831	0.00175
0.44983	0.91059					0.34966	0.00127		17.65	0		2.97823	0.0017
0.45834	1.1719					0.34996	0.00127		17.75	0		2.99815	0.00167
0.41685	2.46671					0.35026	0.00127		17.85	0		3.01807	0.00163
0.44499	1.57515					0.35055	0.00127		17.95	0		3.03799	0.00159
0.46082	0.61273					0.35085	0.00127		18.05	0		3.05	0.00157
0.45006	0.81124					0.35115	0.00127		18.15	0		3.05791	0.00155
0.52489	0.21412					0.35145	0.00127		18.25	0		3.07783	0.00152
0.47511	0.37628					0.35174	0.00127		18.35	0		3.09775	0.00149
0.45227	0.49343					0.35204	0.00127		18.45	6.04814E-5		3.11767	0.00145
0.45974	0.20437					0.35234	0.00127		18.55	0		3.13759	0.00142
0.45454	0.33787					0.3525	0.00127		18.65	0		3.15	0.0014
0.44747	0.58595					0.35264	0.00127		18.75	0		3.15751	0.00139
0.4463	0.53694					0.35293	0.00127		18.85	0		3.17743	0.00136
0.46761	0.42579					0.35323	0.00127		18.95	0		3.19735	0.00133
0.45317	0.7749					0.35353	0.00127		19.05	0		3.21727	0.0013
0.45634	0.97334					0.35382	0.00127		19.15	0		3.23719	0.00128
0.45234	2.92408					0.35412	0.00127		19.25	0		3.25	0.00126
0.45927	1.27619					0.35442	0.00127		19.35	0		3.25711	0.00125
0.48444	0.2456					0.35472	0.00127		19.45	0		3.27703	0.00123
0.45371	2.87126					0.35501	0.00127		19.55	0		3.29695	0.0012
0.44771	0.70778					0.35531	0.00127		19.65	0		3.31687	0.00118
0.44825	0.33944					0.3555	0.00127		19.75	0		3.33679	0.00115
0.45995	0.34277					0.35561	0.00127		19.85	0		3.35	0.00114
0.46472	2.11938					0.35591	0.00127		19.95	0		3.35671	0.00113
0.45774	1.03203					0.3562	0.00127					3.37663	0.00111
0.45072	1.17893					0.3565	0.00127					3.39655	0.00109
0.47173	0.72626					0.3568	0.00127					3.41647	0.00107
0.51057	0.20217					0.35709	0.00127					3.43639	0.00105
0.46115	0.74329					0.35739	0.00127					3.45	0.00103
0.49374	0.27456					0.35769	0.00127					3.45631	0.00103
0.43506	0.50348					0.35799	0.00127					3.47623	0.00101
0.45516	0.49835					0.35828	0.00127					3.49615	9.8991E-4
0.45254	1.17222					0.3585	0.00127					3.51607	9.72053E-4
0.44723	1.55869					0.35858	0.00127					3.53599	9.54708E-4
0.45081	0.72114					0.35888	0.00127					3.55	9.42804E-4
0.45017	0.81829					0.35918	0.00127					3.55591	9.3786E-4
0.44289	1.2151					0.35947	0.00127					3.57583	9.21491E-4
0.45992	0.69651					0.35977	0.00127					3.59575	9.05589E-4
0.44232	0.34015					0.36007	0.00127					3.61567	8.90137E-4
0.4561	1.28265					0.36036	0.00127					3.63559	8.75121E-4
0.39826	0.2179					0.36066	0.00127					3.65	8.6452E-4
0.46712	0.48641					0.36096	0.00127					3.65551	8.60529E-4
0.47363	0.30725					0.36126	0.00127					3.67543	8.46346E-4
0.44561	0.38385					0.3615	0.00127					3.69535	8.3256E-4
0.46028	0.32336					0.36155	0.00127					3.71527	8.1916E-4
0.4526	1.67771					0.36185	0.00127					3.73519	8.06132E-4
0.44947	0.31548					0.36215	0.00127					3.75	7.96678E-4
0.42102	0.83026					0.36245	0.00127					3.75511	7.93466E-4
0.4543	0.64676					0.36274	0.00127					3.77503	7.8115E-4
0.44399	0.26035					0.36304	0.00127					3.79494	7.69173E-4
0.45124	0.36664					0.36334	0.00127					3.81486	7.57526E-4
0.45243	0.70642					0.36364	0.00127					3.83478	7.46199E-4
0.45265	0.97805					0.36393	0.00127					3.85	7.37755E-4
0.45272	3.2786					0.36423	0.00127					3.8547	7.35181E-4
0.4414	1.0752					0.3645	0.00127					3.87462	7.24463E-4
0.4582	1.1154					0.36453	0.00127					3.89454	7.14036E-4
0.42171	1.52827					0.36482	0.00127					3.91446	7.03892E-4
0.4521	1.07459					0.36512	0.00127					3.93438	6.94022E-4
0.45264	2.32402					0.36542	0.00127					3.95	6.86471E-4
0.45095	0.31354					0.36572	0.00127					3.9543	6.84418E-4
0.45101	2.48135					0.36601	0.00127					3.97422	6.75072E-4
0.46935	0.70371					0.36631	0.00127					3.99414	6.65976E-4
0.4462	0.89324					0.36661	0.00127					4.01406	6.57123E-4
0.44766	2.25099					0.36691	0.00127					4.03398	6.48506E-4
0.4637	2.81529					0.3672	0.00127					4.05	6.41744E-4
0.46209	1.0936					0.3675	0.00127					4.0539	6.40117E-4
0.45662	0.40233					0.3678	0.00127					4.07382	6.31951E-4
0.47294	0.3524					0.36809	0.00127					4.09374	6.24E-4
0.42904	0.43071					0.36839	0.00127					4.11366	6.16259E-4
0.49599	0.22521					0.36869	0.00127					4.13358	6.0872E-4
0.47537	2.05169					0.36899	0.00127					4.15	6.02656E-4
0.47006	0.24247					0.36928	0.00127					4.1535	6.01379E-4
0.46152	0.25893					0.36958	0.00127					4.17342	5.9423E-4
0.44144	0.99565					0.36988	0.00127					4.19334	5.87266E-4
0.47159	0.31217					0.37018	0.00127					4.21326	5.80484E-4
0.45188	0.66797					0.37047	0.00127					4.23318	5.73877E-4
0.52132	0.21171					0.3705	0.00127					4.25	5.68432E-4
0.50467	0.203					0.37077	0.00127					4.2531	5.6744E-4
0.44854	3.7346					0.37107	0.00127					4.27302	5.61169E-4
0.45286	0.31526					0.37136	0.00127					4.29294	5.55059E-4
0.47327	0.33895					0.37166	0.00127					4.31286	5.49106E-4
0.44947	0.41367					0.37196	0.00127					4.33278	5.43305E-4
0.46277	0.87382					0.37226	0.00127					4.35	5.38409E-4
0.45993	0.35551					0.37255	0.00127					4.3527	5.37651E-4
0.44554	1.05884					0.37285	0.00127					4.37262	5.3214E-4
0.45135	1.06296					0.37315	0.00127					4.39254	5.2677E-4
0.4345	0.88123					0.37345	0.00127					4.41246	5.21535E-4
0.45686	1.37848					0.3735	0.00127					4.43238	5.16431E-4
0.45471	0.58978					0.37374	0.00127					4.45	5.12025E-4
0.39152	0.30243					0.37404	0.00127					4.4523	5.11456E-4
0.44216	4.77402					0.37434	0.00127					4.47222	5.06606E-4
0.45429	0.24689					0.37464	0.00127					4.49214	5.01876E-4
0.45392	1.59308					0.37493	0.00127					4.51206	4.97265E-4
0.4493	1.50892					0.37523	0.00127					4.53198	4.92768E-4
0.45388	1.65253					0.37553	0.00127					4.55	4.88796E-4
0.46018	0.60965					0.37582	0.00127					4.5519	4.88382E-4
0.4684	0.35949					0.37612	0.00127					4.57182	4.84105E-4
0.47949	0.33992					0.37642	0.00127					4.59174	4.79934E-4
0.43047	0.66194					0.3765	0.00127					4.61166	4.75865E-4
0.45574	0.75931					0.37672	0.00127					4.63158	4.71895E-4
0.47781	0.27718					0.37701	0.00127					4.65	4.68312E-4
0.4504	0.40605					0.37731	0.00127					4.6515	4.68023E-4
0.45886	0.93965					0.37761	0.00127					4.67142	4.64246E-4
0.45599	0.95362					0.37791	0.00127					4.69134	4.6056E-4
0.47634	0.31796					0.3782	0.00127					4.71126	4.56963E-4
0.43707	0.65447					0.3785	0.00127					4.73118	4.53454E-4
0.46568	0.65208					0.3788	0.00127					4.75	4.50217E-4
0.45268	1.16546					0.37909	0.00127					4.7511	4.5003E-4
0.46093	0.60374					0.37939	0.00127					4.77102	4.46687E-4
0.45343	0.80662					0.3795	0.00127					4.79094	4.43426E-4
0.43984	2.88218					0.37969	0.00127					4.81086	4.40242E-4
0.45637	0.74771					0.37999	0.00127					4.83078	4.37134E-4
0.46177	0.33838					0.38028	0.00127					4.85	4.34206E-4
0.45657	0.69575					0.38058	0.00127					4.8507	4.34101E-4
0.44225	0.61525					0.38088	0.00127					4.87062	4.3114E-4
0.46399	0.91056					0.38118	0.00127					4.89054	4.28248E-4
0.43943	1.29078					0.38147	0.00127					4.91046	4.25426E-4
0.47892	0.4947					0.38177	0.00127					4.93038	4.2267E-4
0.45343	1.17801					0.38207	0.00127					4.95	4.20019E-4
0.44843	0.61844					0.38236	0.00127					4.9503	4.19978E-4
0.43793	0.81931					0.3825	0.00127					4.97022	4.1735E-4
0.45123	1.98388					0.38266	0.00127					4.99014	4.14784E-4
0.45209	0.79064					0.38296	0.00127					5.01006	4.12277E-4
0.46635	0.78614					0.38326	0.00127					5.02998	4.09829E-4
0.4431	0.75195					0.38355	0.00127					5.0499	4.07438E-4
0.44023	2.60326					0.38385	0.00127					5.05	4.07426E-4
0.44169	2.87603					0.38415	0.00127					5.06982	4.05103E-4
0.46271	0.29458					0.38445	0.00127					5.08974	4.02821E-4
0.44896	1.14769					0.38474	0.00127					5.10966	4.00592E-4
0.46826	0.32684					0.38504	0.00127					5.12958	3.98414E-4
0.44944	0.68867					0.38534	0.00127					5.1495	3.96287E-4
0.4522	1.45172					0.3855	0.00127					5.15	3.96234E-4
0.45381	0.88823					0.38564	0.00127					5.16942	3.94208E-4
0.44834	0.6631					0.38593	0.00127					5.18934	3.92177E-4
0.46564	0.27915					0.38623	0.00127					5.20926	3.90192E-4
0.45845	0.56811					0.38653	0.00127					5.22918	3.88252E-4
0.4458	1.55049					0.38682	0.00127					5.2491	3.86356E-4
0.45864	0.63689					0.38712	0.00127					5.25	3.86271E-4
0.44341	0.96948					0.38742	0.00127					5.26902	3.84503E-4
0.45498	1.23491					0.38772	0.00127					5.28894	3.82692E-4
0.46969	0.20731					0.38801	0.00127					5.30886	3.80922E-4
0.46811	1.116					0.38831	0.00127					5.32878	3.79191E-4
0.43923	1.69022					0.3885	0.00127					5.3487	3.775E-4
0.39591	0.39738					0.38861	0.00127					5.35	3.7739E-4
0.50138	0.21784					0.38891	0.00127					5.36862	3.75846E-4
0.46709	0.46405					0.3892	0.00127					5.38854	3.74229E-4
0.45716	1.45078					0.3895	0.00127					5.40846	3.72648E-4
0.46428	0.69827					0.3898	0.00127					5.42838	3.71103E-4
0.45091	0.61192					0.39009	0.00127					5.4483	3.69591E-4
0.48009	0.30325					0.39039	0.00127					5.45	3.69464E-4
0.46326	1.07005					0.39069	0.00127					5.46822	3.68113E-4
0.45245	1.30209					0.39099	0.00127					5.48814	3.66668E-4
0.452	0.59113					0.39128	0.00127					5.50806	3.65254E-4
0.38489	5.60444					0.3915	0.00127					5.52798	3.63872E-4
0.4584	1.26589					0.39158	0.00127					5.5479	3.62519E-4
0.45172	1.26595					0.39188	0.00127					5.55	3.62378E-4
0.45216	0.3858					0.39218	0.00127					5.56782	3.61197E-4
0.45906	0.72239					0.39247	0.00127					5.58774	3.59903E-4
0.45412	0.25294					0.39277	0.00127					5.60766	3.58637E-4
0.44723	1.28759					0.39307	0.00127					5.62758	3.57399E-4
0.45184	0.94002					0.39336	0.00127					5.6475	3.56188E-4
0.44779	0.82506					0.39366	0.00127					5.65	3.56037E-4
0.46373	0.55332					0.39396	0.00127					5.66742	3.55003E-4
0.50216	0.27152					0.39426	0.00127					5.68734	3.53843E-4
0.49341	0.26469					0.3945	0.00127					5.70726	3.52708E-4
0.48012	0.24397					0.39455	0.00127					5.72718	3.51598E-4
0.45488	0.34911					0.39485	0.00127					5.7471	3.50512E-4
0.41847	0.27193					0.39515	0.00127					5.75	3.50355E-4
0.45413	0.52383					0.39545	0.00127					5.76702	3.49448E-4
0.45813	0.73177					0.39574	0.00127					5.78694	3.48408E-4
0.44933	0.6438					0.39604	0.00127					5.80686	3.47389E-4
0.46068	0.60635					0.39634	0.00127					5.82678	3.46393E-4
0.44642	0.70377					0.39664	0.00127					5.8467	3.45417E-4
0.46505	0.37632					0.39693	0.00127					5.85	3.45257E-4
0.4546	1.41474					0.39723	0.00127					5.86662	3.44462E-4
0.46016	0.69474					0.3975	0.00127					5.88654	3.43527E-4
0.44385	2.47605					0.39753	0.00127					5.90646	3.42612E-4
0.45186	0.78003					0.39782	0.00127					5.92638	3.41716E-4
0.45315	0.58582					0.39812	0.00127					5.9463	3.40839E-4
0.44584	0.60097					0.39842	0.00127					5.95	3.40678E-4
0.43557	0.21972					0.39872	0.00127					5.96622	3.3998E-4
0.45454	1.42308					0.39901	0.00127					5.98614	3.39139E-4
0.44737	1.10666					0.39931	0.00127					6.00606	3.38315E-4
0.43142	0.47837					0.39961	0.00127					6.02598	3.37509E-4
0.47435	0.24488					0.39991	0.00127					6.0459	3.36719E-4
0.46692	0.41788					0.4002	0.00127					6.05	3.36559E-4
0.44428	1.23175					0.4005	0.00127					6.06582	3.35946E-4
0.45025	0.97214					0.4008	0.00127					6.08574	3.35189E-4
0.45908	1.64651					0.40109	0.00127					6.10566	3.34447E-4
0.44848	0.99688					0.40139	0.00127					6.12558	3.33721E-4
0.45905	1.06967					0.40169	0.00127					6.1455	3.33009E-4
0.46698	1.37654					0.40199	0.00127					6.15	3.3285E-4
0.46617	0.32386					0.40228	0.00127					6.16542	3.32312E-4
0.48395	0.31164					0.40258	0.00127					6.18534	3.3163E-4
0.46088	1.08297					0.40288	0.00127					6.20526	3.30961E-4
0.45383	2.94874					0.40318	0.00127					6.22518	3.30306E-4
0.46143	0.55101					0.40347	0.00127					6.2451	3.29664E-4
0.46885	0.24294					0.4035	0.00127					6.25	3.29508E-4
0.08777	0.46329					0.40377	0.00127					6.26502	3.29035E-4
0.45051	1.10414					0.40407	0.00127					6.28493	3.28419E-4
0.45421	3.82749					0.40436	0.00127					6.30485	3.27815E-4
0.47606	0.33426					0.40466	0.00127					6.32477	3.27223E-4
0.46271	1.09653					0.40496	0.00127					6.34469	3.26644E-4
0.49151	0.27027					0.40526	0.00127					6.35	3.26491E-4
0.46639	0.82725					0.40555	0.00127					6.36461	3.26076E-4
0.45009	0.25951					0.40585	0.00127					6.38453	3.25519E-4
0.44817	0.68268					0.40615	0.00127					6.40445	3.24973E-4
0.44731	1.95129					0.40645	0.00127					6.42437	3.24439E-4
0.44712	1.27748					0.4065	0.00127					6.44429	3.23915E-4
0.47599	0.33102					0.40674	0.00127					6.45	3.23766E-4
0.44281	1.03291					0.40704	0.00127					6.46421	3.23401E-4
0.46792	1.07682					0.40734	0.00127					6.48413	3.22897E-4
0.46864	0.23858					0.40764	0.00127					6.50405	3.22404E-4
0.45691	0.82856					0.40793	0.00127					6.52397	3.2192E-4
0.45307	0.47134					0.40823	0.00127					6.54389	3.21446E-4
0.46543	0.82361					0.40853	0.00127					6.55	3.21302E-4
0.43793	0.44201					0.40882	0.00127					6.56381	3.20981E-4
0.47626	0.22922					0.40912	0.00127					6.58373	3.20525E-4
0.46674	0.78953					0.40942	0.00127					6.60365	3.20078E-4
0.45799	0.31051					0.4095	0.00127					6.62357	3.1964E-4
0.48566	0.21126					0.40972	0.00127					6.64349	3.1921E-4
0.45649	0.62823					0.41001	0.00127					6.65	3.19072E-4
0.45308	0.48747					0.41031	0.00127					6.66341	3.18789E-4
0.48145	0.366					0.41061	0.00127					6.68333	3.18376E-4
0.4582	0.67753					0.41091	0.00127					6.70325	3.17971E-4
0.44815	0.92654					0.4112	0.00127					6.72317	3.17574E-4
0.45017	1.31552					0.4115	0.00127					6.74309	3.17184E-4
0.46584	1.06993					0.4118	0.00128					6.75	3.17051E-4
0.4394	3.03825					0.41209	0.00128					6.76301	3.16802E-4
0.46247	0.42356					0.41239	0.00128					6.78293	3.16427E-4
0.45234	0.35051					0.4125	0.00128					6.80285	3.1606E-4
0.46059	1.78983					0.41269	0.00128					6.82277	3.15699E-4
0.43252	0.43713					0.41299	0.00128					6.84269	3.15345E-4
0.4767	0.28193					0.41328	0.00128					6.85	3.15217E-4
0.45254	0.49441					0.41358	0.00128					6.86261	3.14999E-4
0.44427	0.80801					0.41388	0.00128					6.88253	3.14658E-4
0.44391	0.34311					0.41418	0.00128					6.90245	3.14324E-4
0.45528	0.75714					0.41447	0.00129					6.92237	3.13997E-4
0.44946	1.06602					0.41477	0.00129					6.94229	3.13676E-4
0.45705	0.28657					0.41507	0.00129					6.95	3.13553E-4
0.46962	0.57892					0.41536	0.00129					6.96221	3.13361E-4
0.46475	0.60715					0.4155	0.00129					6.98213	3.13051E-4
0.44977	1.564					0.41566	0.00129					7.00205	3.12748E-4
0.44524	1.54802					0.41596	0.0013					7.02197	3.1245E-4
0.43829	1.31525					0.41626	0.0013					7.04189	3.12158E-4
0.45766	1.27316					0.41655	0.0013					7.05	3.12041E-4
0.46578	0.57658					0.41685	0.00131					7.06181	3.11871E-4
0.46306	0.49946					0.41715	0.00131					7.08173	3.1159E-4
0.4498	2.51312					0.41745	0.00132					7.10165	3.11314E-4
0.4601	1.0514					0.41774	0.00132					7.12157	3.11043E-4
0.44862	1.01232					0.41804	0.00133					7.14149	3.10777E-4
0.47429	0.35906					0.41834	0.00134					7.15	3.10665E-4
0.45009	2.72725					0.4185	0.00134					7.16141	3.10516E-4
0.46279	0.84697					0.41864	0.00134					7.18133	3.1026E-4
0.45822	0.81634					0.41893	0.00135					7.20125	3.10008E-4
0.44555	1.89676					0.41923	0.00136					7.22117	3.09762E-4
0.44727	2.41055					0.41953	0.00137					7.24109	3.09519E-4
0.45546	1.10646					0.41982	0.00138					7.25	3.09413E-4
0.46683	0.45338					0.42012	0.00139					7.26101	3.09282E-4
0.45255	2.58003					0.42042	0.00141					7.28093	3.09048E-4
0.47755	0.32899					0.42072	0.00142					7.30085	3.08819E-4
0.4563	0.28688					0.42101	0.00144					7.32077	3.08594E-4
0.48293	0.30158					0.42131	0.00146					7.34069	3.08373E-4
0.4658	0.45458					0.4215	0.00147					7.35	3.08271E-4
0.44798	1.99846					0.42161	0.00148					7.36061	3.08156E-4
0.45408	0.29477					0.42191	0.0015					7.38053	3.07944E-4
0.45471	0.73415					0.4222	0.00152					7.40045	3.07735E-4
0.47507	0.20261					0.4225	0.00155					7.42037	3.07529E-4
0.45651	0.55809					0.4228	0.00158					7.44029	3.07328E-4
0.44738	1.4323					0.42309	0.00161					7.45	3.07231E-4
0.46397	0.57544					0.42339	0.00164					7.46021	3.0713E-4
0.45459	2.17031					0.42369	0.00168					7.48013	3.06935E-4
0.45891	1.88942					0.42399	0.00172					7.50005	3.06745E-4
0.46577	0.2378					0.42428	0.00176					7.51997	3.06557E-4
0.44913	1.41252					0.4245	0.0018					7.53989	3.06373E-4
0.4573	0.48139					0.42458	0.00181					7.55	3.06281E-4
0.45039	0.25075					0.42488	0.00186					7.55981	3.06192E-4
0.45914	1.13986					0.42518	0.00192					7.57973	3.06015E-4
0.45461	2.09039					0.42547	0.00198					7.59965	3.0584E-4
0.4492	0.78753					0.42577	0.00205					7.61957	3.05669E-4
0.44585	1.58271					0.42607	0.00212					7.63949	3.05501E-4
0.45143	0.50671					0.42636	0.00219					7.65	3.05413E-4
0.43615	0.27874					0.42666	0.00228					7.65941	3.05336E-4
0.46026	0.3261					0.42696	0.00237					7.67933	3.05173E-4
0.45194	1.35907					0.42726	0.00247					7.69925	3.05014E-4
0.45602	0.77284					0.4275	0.00255					7.71917	3.04857E-4
0.43757	1.57933					0.42755	0.00257					7.73909	3.04703E-4
0.44192	0.95529					0.42785	0.00269					7.75	3.0462E-4
0.43876	1.37356					0.42815	0.00281					7.75901	3.04552E-4
0.47305	0.29555					0.42845	0.00294					7.77893	3.04403E-4
0.46835	0.52654					0.42874	0.00308					7.79885	3.04257E-4
0.46364	0.61626					0.42904	0.00324					7.81877	3.04114E-4
0.482	0.4054					0.42934	0.0034					7.83869	3.03973E-4
0.45951	1.49394					0.42964	0.00357					7.85	3.03894E-4
0.444	0.66352					0.42993	0.00376					7.85861	3.03835E-4
0.44527	0.86165					0.43023	0.00396					7.87853	3.03699E-4
0.51064	0.26448					0.4305	0.00415					7.89845	3.03565E-4
0.44132	1.88168					0.43053	0.00417					7.91837	3.03434E-4
0.45084	1.35466					0.43082	0.0044					7.93829	3.03305E-4
0.44708	1.47185					0.43112	0.00465					7.95	3.0323E-4
0.44868	0.86065					0.43142	0.0049					7.95821	3.03178E-4
0.44121	0.74622					0.43172	0.00518					7.97813	3.03053E-4
0.46855	0.22597					0.43201	0.00547					7.99805	3.02931E-4
0.49531	0.27128					0.43231	0.00579					8.01797	3.0281E-4
0.4433	3.96978					0.43261	0.00612					8.03789	3.02692E-4
0.4515	1.10333					0.43291	0.00647					8.05	3.02621E-4
0.45549	0.45858					0.4332	0.00684					8.05781	3.02575E-4
0.45816	0.39203					0.4335	0.00723					8.07773	3.02461E-4
0.46214	0.67791					0.4338	0.00765					8.09765	3.02349E-4
0.42851	1.11597					0.43409	0.00809					8.11757	3.02238E-4
0.41419	2.90954					0.43439	0.00855					8.13749	3.0213E-4
0.46535	1.03946					0.43469	0.00904					8.15	3.02062E-4
0.46186	0.4865					0.43499	0.00956					8.15741	3.02023E-4
0.45312	0.99309					0.43528	0.0101					8.17733	3.01918E-4
0.4621	3.38287					0.43558	0.01067					8.19725	3.01815E-4
0.45553	0.48581					0.43588	0.01127					8.21717	3.01713E-4
0.4537	0.34161					0.43618	0.0119					8.23709	3.01614E-4
0.45954	1.11329					0.43647	0.01256					8.25	3.0155E-4
0.47164	0.21748					0.4365	0.01262					8.25701	3.01516E-4
0.4589	1.0744					0.43677	0.01325					8.27693	3.01419E-4
0.44202	1.22811					0.43707	0.01397					8.29685	3.01324E-4
0.45104	0.50717					0.43736	0.01472					8.31677	3.01231E-4
0.45302	1.60627					0.43766	0.01551					8.33669	3.0114E-4
0.46081	0.60331					0.43796	0.01633					8.35	3.01079E-4
0.46071	0.38766					0.43826	0.01719					8.35661	3.01049E-4
0.45462	0.53834					0.43855	0.01808					8.37653	3.00961E-4
0.45467	1.1301					0.43885	0.019					8.39645	3.00874E-4
0.45328	1.75549					0.43915	0.01996					8.41637	3.00788E-4
0.46602	0.62742					0.43945	0.02096					8.43629	3.00704E-4
0.44962	0.50083					0.4395	0.02115					8.45	3.00647E-4
0.46301	0.54322					0.43974	0.02199					8.45621	3.00621E-4
0.47615	0.50307					0.44004	0.02306					8.47613	3.00539E-4
0.44576	1.16956					0.44034	0.02417					8.49605	3.00459E-4
0.44273	0.59069					0.44064	0.02531					8.51597	3.0038E-4
0.43451	1.54659					0.44093	0.02649					8.53589	3.00303E-4
0.46104	0.40132					0.44123	0.02771					8.55	3.00249E-4
0.45459	0.25468					0.44153	0.02896					8.55581	3.00227E-4
0.45937	0.57792					0.44182	0.03025					8.57573	3.00152E-4
0.46434	1.24564					0.44212	0.03157					8.59565	3.00078E-4
0.46169	1.41139					0.44242	0.03293					8.61557	3.00005E-4
0.44873	0.65127					0.4425	0.03331					8.63549	2.99934E-4
0.46198	0.60646					0.44272	0.03432					8.65	2.99883E-4
0.44159	1.14728					0.44301	0.03575					8.65541	2.99864E-4
0.45634	0.94383					0.44331	0.0372					8.67533	2.99795E-4
0.43515	2.99544					0.44361	0.03869					8.69525	2.99727E-4
0.41486	3.94606					0.44391	0.04021					8.71517	2.9966E-4
0.46345	0.75282					0.4442	0.04176					8.73509	2.99594E-4
0.46077	0.50058					0.4445	0.04333					8.75	2.99546E-4
0.47258	0.71973					0.4448	0.04493					8.75501	2.99529E-4
0.4973	0.23952					0.44509	0.04655					8.77492	2.99466E-4
0.45371	2.82701					0.44539	0.04819					8.79484	2.99403E-4
0.4541	0.57159					0.4455	0.0488					8.81476	2.99341E-4
0.43323	0.58187					0.44569	0.04986					8.83468	2.99281E-4
0.42859	2.86357					0.44599	0.05154					8.85	2.99235E-4
0.44626	0.72351					0.44628	0.05324					8.8546	2.99221E-4
0.44897	1.11628					0.44658	0.05495					8.87452	2.99162E-4
0.46835	2.27334					0.44688	0.05668					8.89444	2.99105E-4
0.45668	0.5941					0.44718	0.05841					8.91436	2.99048E-4
0.43953	1.91427					0.44747	0.06015					8.93428	2.98992E-4
0.43065	0.92425					0.44777	0.06189					8.95	2.98948E-4
0.44539	0.37083					0.44807	0.06363					8.9542	2.98937E-4
0.46051	1.29808					0.44836	0.06537					8.97412	2.98883E-4
0.46988	0.42673					0.4485	0.06616					8.99404	2.98829E-4
0.44833	0.86347					0.44866	0.0671					9.01396	2.98777E-4
0.46274	1.12828					0.44896	0.06883					9.03388	2.98725E-4
0.44474	0.7591					0.44926	0.07055					9.05	2.98684E-4
0.44963	1.50711					0.44955	0.07225					9.0538	2.98674E-4
0.48829	0.24278					0.44985	0.07393					9.07372	2.98624E-4
0.49192	0.34265					0.45015	0.07559					9.09364	2.98575E-4
0.45629	1.13842					0.45045	0.07723					9.11356	2.98527E-4
0.44892	0.53507					0.45074	0.07884					9.13348	2.98479E-4
0.47126	0.30284					0.45104	0.08042					9.15	2.9844E-4
0.45567	0.53905					0.45134	0.08197					9.1534	2.98432E-4
0.44807	1.24069					0.4515	0.0828					9.17332	2.98386E-4
0.43585	0.767					0.45164	0.08348					9.19324	2.9834E-4
0.45847	1.56281					0.45193	0.08495					9.21316	2.98296E-4
0.44416	1.00329					0.45223	0.08638					9.23308	2.98251E-4
0.45763	1.07712					0.45253	0.08776					9.25	2.98215E-4
0.46287	0.26744					0.45282	0.0891					9.253	2.98208E-4
0.48396	0.21425					0.45312	0.09038					9.27292	2.98165E-4
0.43364	1.16779					0.45342	0.0916					9.29284	2.98123E-4
0.45877	1.25904					0.45372	0.09277					9.31276	2.98082E-4
0.40745	0.85095					0.45401	0.09388					9.33268	2.98041E-4
0.45914	1.25605					0.45431	0.09492					9.35	2.98006E-4
0.47792	0.38154					0.4545	0.09555					9.3526	2.98001E-4
0.49293	0.28062					0.45461	0.0959					9.37252	2.97961E-4
0.48166	0.45468					0.45491	0.09681					9.39244	2.97922E-4
0.45561	0.41915					0.4552	0.09765					9.41236	2.97884E-4
0.49168	0.27695					0.4555	0.09842					9.43228	2.97846E-4
0.44668	0.29411					0.4558	0.09911					9.45	2.97813E-4
0.44382	0.79186					0.45609	0.09973					9.4522	2.97809E-4
0.45202	0.95808					0.45639	0.10028					9.47212	2.97773E-4
0.43127	0.62299					0.45669	0.10074					9.49204	2.97737E-4
0.47393	0.28718					0.45699	0.10113					9.51196	2.97701E-4
0.48569	0.211					0.45728	0.10143					9.53188	2.97666E-4
0.44867	1.61162					0.4575	0.10161					9.55	2.97635E-4
0.4392	0.5279					0.45758	0.10166					9.5518	2.97632E-4
0.46617	1.00057					0.45788	0.1018					9.57172	2.97598E-4
0.45518	2.02584					0.45818	0.10186					9.59164	2.97565E-4
0.45635	0.44116					0.45847	0.10184					9.61156	2.97532E-4
0.41098	2.33368					0.45877	0.10174					9.63148	2.97499E-4
0.46942	0.25529					0.45907	0.10155					9.65	2.9747E-4
0.46108	0.73105					0.45936	0.10129					9.6514	2.97468E-4
0.46401	0.73379					0.45966	0.10094					9.67132	2.97436E-4
0.44565	0.83894					0.45996	0.10052					9.69124	2.97405E-4
0.45511	0.58412					0.46026	0.10001					9.71116	2.97375E-4
0.47288	0.23079					0.4605	0.09954					9.73108	2.97345E-4
0.44325	1.31834					0.46055	0.09943					9.75	2.97317E-4
0.46456	0.32845					0.46085	0.09877					9.751	2.97315E-4
0.42562	2.29037					0.46115	0.09804					9.77092	2.97286E-4
0.47506	0.7509					0.46145	0.09723					9.79084	2.97257E-4
0.45655	2.20222					0.46174	0.09636					9.81076	2.97229E-4
0.46023	0.24665					0.46204	0.09541					9.83068	2.97201E-4
0.46471	0.31457					0.46234	0.0944					9.85	2.97175E-4
0.41881	0.25551					0.46264	0.09332					9.8506	2.97174E-4
0.44939	0.33774					0.46293	0.09218					9.87052	2.97147E-4
0.68811	0.32378					0.46323	0.09099					9.89044	2.9712E-4
0.48473	0.33384					0.4635	0.08985					9.91036	2.97094E-4
0.45509	1.05025					0.46353	0.08973					9.93028	2.97068E-4
0.44451	2.63914					0.46382	0.08843					9.95	2.97043E-4
0.46952	0.2994					0.46412	0.08707					9.9502	2.97043E-4
0.44886	0.42028					0.46442	0.08566					9.97012	2.97018E-4
0.45334	0.28757					0.46472	0.08421					9.99004	2.96993E-4
0.46692	0.52598					0.46501	0.08272					10.01	2.96969E-4
0.46078	0.62076					0.46531	0.08119					10.0299	2.96945E-4
0.45792	1.46259					0.46561	0.07963					10.0498	2.96921E-4
0.44496	1.74649					0.46591	0.07803					10.05	2.96921E-4
0.45269	1.11355					0.4662	0.0764					10.0697	2.96898E-4
0.44747	1.86014					0.4665	0.07475					10.0896	2.96875E-4
0.45546	1.08803					0.4668	0.07308					10.1096	2.96852E-4
0.48388	0.38319					0.46709	0.07138					10.1295	2.9683E-4
0.43549	0.42209					0.46739	0.06968					10.1494	2.96808E-4
0.45018	0.66558					0.46769	0.06795					10.15	2.96808E-4
0.47048	0.22351					0.46799	0.06622					10.1693	2.96787E-4
0.45025	1.3954					0.46828	0.06449					10.1892	2.96765E-4
0.4406	0.71985					0.46858	0.06274					10.2092	2.96744E-4
0.44736	1.95157					0.46888	0.061					10.2291	2.96724E-4
0.44659	0.76702					0.46918	0.05926					10.249	2.96703E-4
0.44017	0.5029					0.46947	0.05753					10.25	2.96702E-4
0.44578	1.13416					0.4695	0.05737					10.2689	2.96683E-4
0.48944	0.25939					0.46977	0.0558					10.2888	2.96663E-4
0.46648	0.268					0.47007	0.05408					10.3088	2.96644E-4
0.43864	1.74314					0.47036	0.05238					10.3287	2.96625E-4
0.48768	0.31662					0.47066	0.05069					10.3486	2.96606E-4
0.46241	0.64444					0.47096	0.04901					10.35	2.96604E-4
0.46082	1.92705					0.47126	0.04736					10.3685	2.96587E-4
0.49255	0.20544					0.47155	0.04572					10.3884	2.96568E-4
0.6433	0.3386					0.47185	0.04411					10.4084	2.9655E-4
0.33847	0.43342					0.47215	0.04253					10.4283	2.96532E-4
0.4512	1.1036					0.47245	0.04097					10.4482	2.96515E-4
0.45117	2.2363					0.4725	0.04069					10.45	2.96513E-4
0.45333	0.42033					0.47274	0.03944					10.4681	2.96497E-4
0.45012	2.52409					0.47304	0.03793					10.488	2.9648E-4
0.45064	1.3797					0.47334	0.03646					10.508	2.96463E-4
0.45361	1.36104					0.47364	0.03502					10.5279	2.96447E-4
0.54122	0.29367					0.47393	0.03361					10.5478	2.9643E-4
0.48917	0.21957					0.47423	0.03224					10.55	2.96428E-4
0.50594	0.22685					0.47453	0.0309					10.5677	2.96414E-4
0.4545	1.4068					0.47482	0.02959					10.5876	2.96398E-4
0.47914	0.27443					0.47512	0.02832					10.6076	2.96382E-4
0.45742	1.01951					0.47542	0.02709					10.6275	2.96367E-4
0.46308	0.56262					0.4755	0.02676					10.6474	2.96352E-4
0.44905	0.87865					0.47572	0.02589					10.65	2.9635E-4
0.46484	0.30059					0.47601	0.02473					10.6673	2.96336E-4
0.45457	0.45225					0.47631	0.0236					10.6872	2.96322E-4
0.45933	1.40958					0.47661	0.02252					10.7072	2.96307E-4
0.46886	0.3601					0.47691	0.02146					10.7271	2.96292E-4
0.45214	1.9157					0.4772	0.02045					10.747	2.96278E-4
0.45147	1.34199					0.4775	0.01947					10.75	2.96276E-4
0.44543	0.85144					0.4778	0.01853					10.7669	2.96264E-4
0.45595	0.79418					0.47809	0.01762					10.7868	2.9625E-4
0.44373	0.88257					0.47839	0.01675					10.8068	2.96237E-4
0.46459	0.25217					0.4785	0.01644					10.8267	2.96223E-4
0.44488	1.1471					0.47869	0.01591					10.8466	2.9621E-4
0.4907	0.2144					0.47899	0.01511					10.85	2.96208E-4
0.46293	1.74634					0.47928	0.01434					10.8665	2.96197E-4
0.47315	0.591					0.47958	0.0136					10.8864	2.96184E-4
0.4861	0.45864					0.47988	0.01289					10.9064	2.96171E-4
0.44659	0.58935					0.48018	0.01222					10.9263	2.96159E-4
0.44843	2.44478					0.48047	0.01158					10.9462	2.96146E-4
0.45181	0.37787					0.48077	0.01096					10.95	2.96144E-4
0.46502	0.96057					0.48107	0.01038					10.9661	2.96134E-4
0.48235	1.16089					0.48136	0.00982					10.986	2.96122E-4
0.45819	0.32311					0.4815	0.00958					11.006	2.9611E-4
0.44914	1.67506					0.48166	0.00929					11.0259	2.96098E-4
0.47411	0.46393					0.48196	0.00879					11.0458	2.96087E-4
0.45422	0.57396					0.48226	0.00831					11.05	2.96084E-4
0.48753	0.817					0.48255	0.00786					11.0657	2.96075E-4
0.4444	0.39166					0.48285	0.00744					11.0856	2.96064E-4
0.44801	1.63101					0.48315	0.00703					11.1056	2.96053E-4
0.46469	0.51185					0.48345	0.00665					11.1255	2.96042E-4
0.45124	0.72079					0.48374	0.00629					11.1454	2.96031E-4
0.44694	0.51393					0.48404	0.00595					11.15	2.96029E-4
0.44689	4.03107					0.48434	0.00562					11.1653	2.96021E-4
0.46045	0.83533					0.4845	0.00546					11.1852	2.9601E-4
0.45489	0.38943					0.48464	0.00532					11.2052	2.96E-4
0.44667	0.54303					0.48493	0.00504					11.2251	2.9599E-4
0.45377	1.24277					0.48523	0.00477					11.245	2.95979E-4
0.44705	0.72243					0.48553	0.00452					11.25	2.95977E-4
0.47145	0.38737					0.48582	0.00428					11.2649	2.95969E-4
0.46482	0.69903					0.48612	0.00406					11.2848	2.9596E-4
0.46111	0.89881					0.48642	0.00386					11.3048	2.9595E-4
0.45925	0.67305					0.48672	0.00366					11.3247	2.9594E-4
0.45205	0.59817					0.48701	0.00348					11.3446	2.95931E-4
0.4457	0.6014					0.48731	0.00331					11.35	2.95928E-4
0.47131	0.2721					0.4875	0.00321					11.3645	2.95922E-4
0.45364	0.84071					0.48761	0.00316					11.3844	2.95913E-4
0.45049	2.55217					0.48791	0.00301					11.4044	2.95904E-4
0.44212	2.26926					0.4882	0.00287					11.4243	2.95895E-4
0.45642	0.75159					0.4885	0.00275					11.4442	2.95886E-4
0.43906	1.61686					0.4888	0.00263					11.45	2.95883E-4
0.46022	0.27154					0.48909	0.00252					11.4641	2.95877E-4
0.4453	0.57134					0.48939	0.00242					11.484	2.95869E-4
0.45631	1.48243					0.48969	0.00232					11.5039	2.9586E-4
0.45041	0.97836					0.48999	0.00224					11.5239	2.95852E-4
0.46176	0.27982					0.49028	0.00215					11.5438	2.95844E-4
0.46248	0.69134					0.4905	0.0021					11.55	2.95841E-4
0.45428	0.67199					0.49058	0.00208					11.5637	2.95835E-4
0.45847	0.87878					0.49088	0.00201					11.5836	2.95827E-4
0.4548	1.01442					0.49118	0.00195					11.6036	2.95819E-4
0.49409	0.23475					0.49147	0.00189					11.6235	2.95812E-4
0.47894	2.05853					0.49177	0.00183					11.6434	2.95804E-4
0.46552	0.52224					0.49207	0.00178					11.65	2.95801E-4
0.46893	0.25016					0.49236	0.00174					11.6633	2.95796E-4
0.48072	0.26761					0.49266	0.0017					11.6832	2.95789E-4
0.48394	0.22715					0.49296	0.00166					11.7032	2.95781E-4
0.46024	0.33645					0.49326	0.00162					11.7231	2.95774E-4
0.44759	0.52366					0.4935	0.0016					11.743	2.95767E-4
0.42926	0.52102					0.49355	0.00159					11.75	2.95764E-4
0.41286	0.42291					0.49385	0.00156					11.7629	2.9576E-4
0.44772	2.0282					0.49415	0.00153					11.7828	2.95753E-4
0.46936	0.37212					0.49445	0.00151					11.8027	2.95746E-4
0.45509	0.80713					0.49474	0.00149					11.8227	2.95739E-4
0.46532	1.62749					0.49504	0.00147					11.8426	2.95732E-4
0.4726	0.35542					0.49534	0.00145					11.85	2.9573E-4
0.49272	0.24036					0.49564	0.00143					11.8625	2.95726E-4
0.45058	1.87563					0.49593	0.00141					11.8824	2.95719E-4
0.44497	2.05363					0.49623	0.0014					11.9024	2.95713E-4
0.45045	0.23768					0.4965	0.00139					11.9223	2.95706E-4
0.4399	1.77698					0.49653	0.00139					11.9422	2.957E-4
0.44955	1.9952					0.49682	0.00138					11.95	2.95697E-4
0.44412	5.96866					0.49712	0.00136					11.9621	2.95694E-4
0.51912	0.20347					0.49742	0.00136					11.982	2.95688E-4
0.46734	1.88428					0.49772	0.00135					12.002	2.95681E-4
0.45225	1.14171					0.49801	0.00134					12.0219	2.95675E-4
0.45535	0.28376					0.49831	0.00133					12.0418	2.9567E-4
0.45395	1.12661					0.49861	0.00133					12.05	2.95667E-4
0.45672	0.77938					0.49891	0.00132					12.0617	2.95664E-4
0.46708	0.30339					0.4992	0.00131					12.0816	2.95658E-4
0.46007	0.89214					0.4995	0.00131					12.1015	2.95652E-4
0.48249	0.24488					0.4998	0.00131					12.1215	2.95647E-4
0.45179	0.79104					0.50009	0.0013					12.1414	2.95641E-4
0.46826	0.83784					0.50039	0.0013					12.15	2.95639E-4
0.45127	1.50374					0.50069	0.0013					12.1613	2.95636E-4
0.46181	0.92325					0.50099	0.00129					12.1812	2.9563E-4
0.45	2.8373					0.50128	0.00129					12.2012	2.95625E-4
0.5699	0.35228					0.50158	0.00129					12.2211	2.9562E-4
0.46505	0.62371					0.50188	0.00129					12.241	2.95614E-4
0.50619	0.21995					0.50218	0.00128					12.25	2.95612E-4
0.44638	0.32911					0.50247	0.00128					12.2609	2.95609E-4
0.45342	0.63106					0.5025	0.00128					12.2808	2.95604E-4
0.45695	0.48251					0.50277	0.00128					12.3008	2.95599E-4
0.42402	1.46836					0.50307	0.00128					12.3207	2.95594E-4
0.45167	1.59485					0.50336	0.00128					12.3406	2.95589E-4
0.46117	0.48048					0.50366	0.00128					12.35	2.95587E-4
0.46802	0.37126					0.50396	0.00128					12.3605	2.95584E-4
0.43079	0.82764					0.50426	0.00128					12.3804	2.9558E-4
0.45229	3.05149					0.50455	0.00128					12.4003	2.95575E-4
0.46084	0.48792					0.50485	0.00127					12.4203	2.9557E-4
0.45262	0.55376					0.50515	0.00127					12.4402	2.95566E-4
0.45053	0.90299					0.50545	0.00127					12.45	2.95564E-4
0.48235	0.24319					0.5055	0.00127					12.4601	2.95561E-4
0.45128	0.59971					0.50574	0.00127					12.48	2.95557E-4
0.45748	0.37275					0.50604	0.00127					12.5	2.95552E-4
0.43367	0.56001					0.50634	0.00127					12.5199	2.95548E-4
0.45059	0.2448					0.50664	0.00127					12.5398	2.95544E-4
0.45909	1.78374					0.50693	0.00127					12.55	2.95542E-4
0.45542	1.20039					0.50723	0.00127					12.5597	2.95539E-4
0.45344	1.19379					0.50753	0.00127					12.5796	2.95535E-4
0.47789	0.36721					0.50782	0.00127					12.5996	2.95531E-4
0.47392	0.24276					0.50812	0.00127					12.6195	2.95527E-4
0.48278	0.2469					0.50842	0.00127					12.6394	2.95523E-4
0.45791	0.57231					0.5085	0.00127					12.65	2.95521E-4
0.4504	1.6149					0.50872	0.00127					12.6593	2.95519E-4
0.45253	1.68635					0.50901	0.00127					12.6792	2.95515E-4
0.45812	4.11973					0.50931	0.00127					12.6991	2.95511E-4
0.45899	1.16995					0.50961	0.00127					12.7191	2.95507E-4
0.46431	1.12159					0.50991	0.00127					12.739	2.95504E-4
0.43168	2.08863					0.5102	0.00127					12.75	2.95501E-4
0.38402	0.91534					0.5105	0.00127					12.7589	2.955E-4
0.4575	0.72583					0.5108	0.00127					12.7788	2.95496E-4
0.46357	0.31699					0.51109	0.00127					12.7988	2.95492E-4
0.49453	0.23753					0.51139	0.00127					12.8187	2.95489E-4
0.4342	0.22375					0.5115	0.00127					12.8386	2.95485E-4
0.46817	0.27209					0.51169	0.00127					12.85	2.95483E-4
0.43727	1.76904					0.51199	0.00127					12.8585	2.95482E-4
0.45844	1.15393					0.51228	0.00127					12.8784	2.95478E-4
0.4583	0.41697					0.51258	0.00127					12.8984	2.95475E-4
0.45352	0.90653					0.51288	0.00127					12.9183	2.95471E-4
0.45815	0.45881					0.51318	0.00127					12.9382	2.95468E-4
0.4395	0.71486					0.51347	0.00127					12.95	2.95466E-4
0.55324	0.23869					0.51377	0.00127					12.9581	2.95465E-4
0.45543	1.57159					0.51407	0.00127					12.978	2.95462E-4
0.46613	0.53554					0.51436	0.00127					12.9979	2.95458E-4
0.46732	0.39412					0.5145	0.00127					13.0179	2.95455E-4
0.48022	0.22671					0.51466	0.00127					13.0378	2.95452E-4
0.45207	0.55327					0.51496	0.00127					13.05	2.9545E-4
0.45875	1.01115					0.51526	0.00127					13.0577	2.95449E-4
0.47067	0.70731					0.51555	0.00127					13.0776	2.95446E-4
0.44278	0.69454					0.51585	0.00127					13.0976	2.95443E-4
0.4536	1.66366					0.51615	0.00127					13.1175	2.9544E-4
0.4475	1.52828					0.51645	0.00127					13.1374	2.95437E-4
0.42867	0.32965					0.51674	0.00127					13.15	2.95435E-4
0.45852	1.57654					0.51704	0.00127					13.1573	2.95434E-4
0.4774	0.20653					0.51734	0.00127					13.1772	2.95431E-4
0.47717	0.33995					0.5175	0.00127					13.1972	2.95428E-4
0.46837	0.28731					0.51764	0.00127					13.2171	2.95425E-4
0.4284	0.62762					0.51793	0.00127					13.237	2.95422E-4
0.44988	0.75556					0.51823	0.00127					13.25	2.95421E-4
0.45147	0.27556					0.51853	0.00127					13.2569	2.9542E-4
0.43588	0.82415					0.51882	0.00127					13.2768	2.95417E-4
0.43888	0.9402					0.51912	0.00127					13.2967	2.95414E-4
0.45242	0.47424					0.51942	0.00127					13.3167	2.95412E-4
0.43075	0.69894					0.51972	0.00127					13.3366	2.95409E-4
0.43949	0.2698					0.52001	0.00127					13.35	2.95407E-4
0.48191	0.74435					0.52031	0.00127					13.3565	2.95406E-4
0.45117	2.15041					0.5205	0.00127					13.3764	2.95404E-4
0.48508	0.28604					0.52061	0.00127					13.3963	2.95401E-4
0.43531	1.13795					0.52091	0.00127					13.4163	2.95399E-4
0.4631	0.62309					0.5212	0.00127					13.4362	2.95396E-4
0.48052	0.20975					0.5215	0.00127					13.45	2.95395E-4
0.46024	0.31764					0.5218	0.00127					13.4561	2.95394E-4
0.4883	0.2787					0.52209	0.00127					13.476	2.95391E-4
0.46015	0.68301					0.52239	0.00127					13.496	2.95389E-4
0.47232	0.33563					0.52269	0.00127					13.5159	2.95387E-4
0.4562	0.77014					0.52299	0.00127					13.5358	2.95384E-4
0.43293	0.81427					0.52328	0.00127					13.55	2.95383E-4
0.44777	0.67846					0.5235	0.00127					13.5557	2.95382E-4
0.44921	1.86594					0.52358	0.00127					13.5756	2.9538E-4
0.44805	1.11439					0.52388	0.00127					13.5955	2.95378E-4
0.45403	0.57413					0.52418	0.00127					13.6155	2.95375E-4
0.46587	1.22751					0.52447	0.00127					13.6354	2.95373E-4
0.45498	1.0131					0.52477	0.00127					13.65	2.95372E-4
0.45551	2.83779					0.52507	0.00127					13.6553	2.95371E-4
0.44712	1.39648					0.52536	0.00127					13.6752	2.95369E-4
0.45004	0.82363					0.52566	0.00127					13.6951	2.95367E-4
0.47871	0.20125					0.52596	0.00127					13.7151	2.95365E-4
0.45403	1.60676					0.52626	0.00127					13.735	2.95363E-4
0.46103	0.38709					0.5265	0.00127					13.75	2.95361E-4
0.44643	2.22309					0.52655	0.00127					13.7549	2.9536E-4
0.46702	0.55244					0.52685	0.00127					13.7748	2.95358E-4
0.45843	1.68312					0.52715	0.00127					13.7947	2.95356E-4
0.44708	0.39512					0.52745	0.00127					13.8147	2.95354E-4
0.45713	1.27573					0.52774	0.00127					13.8346	2.95353E-4
0.44685	0.38618					0.52804	0.00127					13.85	2.95351E-4
0.46089	1.15161					0.52834	0.00127					13.8545	2.95351E-4
0.45951	0.48204					0.52864	0.00127					13.8744	2.95349E-4
0.4677	0.72375					0.52893	0.00127					13.8943	2.95347E-4
0.452	1.74283					0.52923	0.00127					13.9143	2.95345E-4
0.46684	0.56839					0.5295	0.00127					13.9342	2.95343E-4
0.4556	0.79663					0.52953	0.00127					13.95	2.95342E-4
0.46312	0.59899					0.52982	0.00127					13.9541	2.95341E-4
0.44492	0.59577					0.53012	0.00127					13.974	2.95339E-4
0.48351	0.3761					0.53042	0.00127					13.9939	2.95338E-4
0.47687	0.37037					0.53072	0.00127					14.0139	2.95336E-4
0.44385	0.73395					0.53101	0.00127					14.0338	2.95334E-4
0.4528	2.36602					0.53131	0.00127					14.05	2.95333E-4
0.46379	0.97961					0.53161	0.00127					14.0537	2.95332E-4
0.44331	0.891					0.53191	0.00127					14.0736	2.95331E-4
0.4846	0.29069					0.5322	0.00127					14.0935	2.95329E-4
0.45482	0.34648					0.5325	0.00127					14.1135	2.95327E-4
0.44524	1.27209					0.5328	0.00127					14.1334	2.95326E-4
0.46106	0.63719					0.53309	0.00127					14.15	2.95324E-4
0.44656	1.62094					0.53339	0.00127					14.1533	2.95324E-4
0.45442	1.68579					0.53369	0.00127					14.1732	2.95323E-4
0.4394	0.55054					0.53399	0.00127					14.1931	2.95321E-4
0.45133	1.71525					0.53428	0.00127					14.2131	2.95319E-4
0.44874	2.23027					0.53458	0.00127					14.233	2.95318E-4
0.4508	0.36812					0.53488	0.00127					14.25	2.95317E-4
0.47745	0.42947					0.53518	0.00127					14.2529	2.95316E-4
0.4709	0.77813					0.53547	0.00127					14.2728	2.95315E-4
0.45532	0.34584					0.5355	0.00127					14.2927	2.95313E-4
0.45854	1.23829					0.53577	0.00127					14.3127	2.95312E-4
0.45517	0.37439					0.53607	0.00127					14.3326	2.9531E-4
0.46931	0.34679					0.53636	0.00127					14.35	2.95309E-4
0.45391	0.67376					0.53666	0.00127					14.3525	2.95309E-4
0.47215	0.34907					0.53696	0.00127					14.3724	2.95308E-4
0.45066	1.94193					0.53726	0.00127					14.3923	2.95306E-4
0.43491	0.46149					0.53755	0.00127					14.4123	2.95305E-4
0.63702	0.24663					0.53785	0.00127					14.4322	2.95303E-4
0.41404	0.26952					0.53815	0.00127					14.45	2.95302E-4
0.44994	0.92309					0.53845	0.00127					14.4521	2.95302E-4
0.45884	0.98822					0.5385	0.00127					14.472	2.95301E-4
0.44079	1.47366					0.53874	0.00127					14.4919	2.95299E-4
0.44241	2.33779					0.53904	0.00127					14.5119	2.95298E-4
0.44714	1.11614					0.53934	0.00127					14.5318	2.95297E-4
0.45307	1.40548					0.53964	0.00127					14.55	2.95295E-4
0.44868	1.08353					0.53993	0.00127					14.5517	2.95295E-4
0.42631	0.35082					0.54023	0.00127					14.5716	2.95294E-4
0.45063	1.86016					0.54053	0.00127					14.5915	2.95293E-4
0.41608	1.8624					0.54082	0.00127					14.6115	2.95292E-4
0.42887	0.6676					0.54112	0.00127					14.6314	2.9529E-4
0.45509	1.16028					0.54142	0.00127					14.65	2.95289E-4
0.4528	0.76712					0.5415	0.00127					14.6513	2.95289E-4
0.44424	1.55188					0.54172	0.00127					14.6712	2.95288E-4
0.45058	1.13159					0.54201	0.00127					14.6911	2.95287E-4
0.44541	1.47591					0.54231	0.00127					14.7111	2.95286E-4
0.44069	1.43757					0.54261	0.00127					14.731	2.95284E-4
0.44738	1.89484					0.54291	0.00127					14.75	2.95283E-4
0.44456	0.6042					0.5432	0.00127					14.7509	2.95283E-4
0.45884	0.79521					0.5435	0.00127					14.7708	2.95282E-4
0.50339	0.25033					0.5438	0.00127					14.7907	2.95281E-4
0.4388	0.3802					0.54409	0.00127					14.8107	2.9528E-4
0.44217	2.55028					0.54439	0.00127					14.8306	2.95279E-4
0.45536	0.80224					0.5445	0.00127					14.85	2.95278E-4
0.46627	1.68371					0.54469	0.00127					14.8505	2.95278E-4
0.45826	0.69479					0.54499	0.00127					14.8704	2.95277E-4
0.44474	1.64781					0.54528	0.00127					14.8903	2.95276E-4
0.44849	0.92159					0.54558	0.00127					14.9103	2.95274E-4
0.3983	0.20265					0.54588	0.00127					14.9302	2.95273E-4
0.44596	1.03176					0.54618	0.00127					14.95	2.95272E-4
0.46028	0.48882					0.54647	0.00127					14.9501	2.95272E-4
0.4481	1.87118					0.54677	0.00127					14.97	2.95271E-4
0.45182	0.85495					0.54707	0.00127					14.9899	2.9527E-4
0.45297	0.51873					0.54736	0.00127					15.0099	2.95269E-4
0.45313	0.92216					0.5475	0.00127					15.0298	2.95268E-4
0.46924	1.29346					0.54766	0.00127					15.0497	2.95267E-4
0.46191	1.49983					0.54796	0.00127					15.05	2.95267E-4
0.50115	0.25053					0.54826	0.00127					15.0696	2.95266E-4
0.46949	2.12659					0.54855	0.00127					15.0895	2.95265E-4
0.44637	1.49461					0.54885	0.00127					15.1095	2.95265E-4
0.45622	0.48752					0.54915	0.00127					15.1294	2.95264E-4
0.45241	1.01221					0.54945	0.00127					15.1493	2.95263E-4
0.463	0.86254					0.54974	0.00127					15.15	2.95263E-4
0.4404	0.49931					0.55004	0.00127					15.1692	2.95262E-4
0.43758	1.68339					0.55034	0.00127					15.1891	2.95261E-4
0.46246	0.49718					0.5505	0.00127					15.2091	2.9526E-4
0.47234	0.26148					0.55064	0.00127					15.229	2.95259E-4
0.45243	2.74265					0.55093	0.00127					15.2489	2.95258E-4
0.48055	0.33086					0.55123	0.00127					15.25	2.95258E-4
0.44082	1.41898					0.55153	0.00127					15.2688	2.95257E-4
0.45214	0.61661					0.55182	0.00127					15.2887	2.95256E-4
0.44571	0.55142					0.55212	0.00127					15.3087	2.95256E-4
0.45046	2.69505					0.55242	0.00127					15.3286	2.95255E-4
0.45519	0.36983					0.55272	0.00127					15.3485	2.95254E-4
0.46186	0.59545					0.55301	0.00127					15.35	2.95254E-4
0.44715	2.25793					0.55331	0.00127					15.3684	2.95253E-4
0.45454	1.43391					0.5535	0.00127					15.3883	2.95252E-4
0.4531	4.50569					0.55361	0.00127					15.4083	2.95252E-4
0.45248	0.35498					0.55391	0.00127					15.4282	2.95251E-4
0.4495	0.51322					0.5542	0.00127					15.4481	2.9525E-4
0.45851	0.79045					0.5545	0.00127					15.45	2.9525E-4
0.43963	0.46103					0.5548	0.00127					15.468	2.95249E-4
0.44505	1.05192					0.55509	0.00127					15.4879	2.95248E-4
0.45667	1.25132					0.55539	0.00127					15.5079	2.95248E-4
0.46132	0.41005					0.55569	0.00127					15.5278	2.95247E-4
0.45223	1.0239					0.55599	0.00127					15.5477	2.95246E-4
0.4926	0.59847					0.55628	0.00127					15.55	2.95246E-4
0.44489	0.57868					0.5565	0.00127					15.5676	2.95245E-4
0.46352	0.5209					0.55658	0.00127					15.5875	2.95245E-4
0.44978	0.28308					0.55688	0.00127					15.6075	2.95244E-4
0.46705	0.38354					0.55718	0.00127					15.6274	2.95243E-4
0.45451	1.40087					0.55747	0.00127					15.6473	2.95243E-4
0.45366	0.31054					0.55777	0.00127					15.65	2.95242E-4
0.44352	1.43432					0.55807	0.00127					15.6672	2.95242E-4
0.46732	0.84732					0.55836	0.00127					15.6871	2.95241E-4
0.48708	0.3219					0.55866	0.00127					15.7071	2.9524E-4
0.45559	1.14395					0.55896	0.00127					15.727	2.9524E-4
0.47322	0.28359					0.55926	0.00127					15.7469	2.95239E-4
0.45725	1.21214					0.5595	0.00127					15.75	2.95239E-4
0.45438	2.1462					0.55955	0.00127					15.7668	2.95238E-4
0.44849	1.07983					0.55985	0.00127					15.7867	2.95238E-4
0.45568	1.09584					0.56015	0.00127					15.8067	2.95237E-4
0.4647	0.47883					0.56045	0.00127					15.8266	2.95237E-4
0.45208	2.70099					0.56074	0.00127					15.8465	2.95236E-4
0.4557	0.52223					0.56104	0.00127					15.85	2.95236E-4
0.45548	0.22169					0.56134	0.00127					15.8664	2.95235E-4
0.46679	1.0762					0.56164	0.00127					15.8863	2.95235E-4
0.44337	1.52961					0.56193	0.00127					15.9063	2.95234E-4
0.46475	0.38534					0.56223	0.00127					15.9262	2.95233E-4
0.42128	0.23056					0.5625	0.00127					15.9461	2.95233E-4
0.47096	0.44763					0.56253	0.00127					15.95	2.95233E-4
0.46213	0.55243					0.56282	0.00127					15.966	2.95232E-4
0.45398	1.6465					0.56312	0.00127					15.9859	2.95232E-4
0.4473	0.96322					0.56342	0.00127					16.05	2.9523E-4
0.46675	0.59665					0.56372	0.00127					16.15	2.95227E-4
0.46814	0.5245					0.56401	0.00127					16.25	2.95224E-4
0.45978	0.44915					0.56431	0.00127					16.35	2.95222E-4
0.46669	0.83953					0.56461	0.00127					16.45	2.9522E-4
0.43103	0.93002					0.56491	0.00127					16.55	2.95217E-4
0.45827	1.2313					0.5652	0.00127					16.65	2.95215E-4
0.46183	1.06763					0.5655	0.00127					16.75	2.95213E-4
0.68721	0.41198					0.5658	0.00127					16.85	2.95211E-4
0.46431	0.79838					0.56609	0.00127					16.95	2.95209E-4
0.44885	1.48097					0.56639	0.00127					17.05	2.95208E-4
0.45657	1.00183					0.56669	0.00127					17.15	2.95206E-4
0.42869	0.78559					0.56699	0.00127					17.25	2.95204E-4
0.45978	0.77818					0.56728	0.00127					17.35	2.95203E-4
0.46382	0.9608					0.56758	0.00127					17.45	2.95201E-4
0.4513	2.18873					0.56788	0.00127					17.55	2.952E-4
0.49148	1.30606					0.56818	0.00127					17.65	2.95199E-4
0.4514	1.15587					0.56847	0.00127					17.75	2.95198E-4
0.45025	1.62282					0.5685	0.00127					17.85	2.95196E-4
0.44027	0.66944					0.56877	0.00127					17.95	2.95195E-4
0.46113	0.63844					0.56907	0.00127					18.05	2.95194E-4
0.4501	0.27031					0.56936	0.00127					18.15	2.95193E-4
0.44458	1.06286					0.56966	0.00127					18.25	2.95192E-4
0.45651	4.26637					0.56996	0.00127					18.35	2.95191E-4
0.49742	1.93708					0.57026	0.00127					18.45	2.9519E-4
0.45814	0.30735					0.57055	0.00127					18.55	2.9519E-4
0.46448	0.94273					0.57085	0.00127					18.65	2.95189E-4
0.45555	0.79142					0.57115	0.00127					18.75	2.95188E-4
0.44546	1.32438					0.57145	0.00127					18.85	2.95187E-4
0.45333	1.84341					0.5715	0.00127					18.95	2.95187E-4
0.44519	1.00389					0.57174	0.00127					19.05	2.95186E-4
0.42935	0.27683					0.5745	0.00127					19.15	2.95185E-4
0.50365	0.37487					0.5775	0.00127					19.25	2.95185E-4
0.45458	1.45148					0.5805	0.00127					19.35	2.95184E-4
0.46252	0.27821					0.5835	0.00127					19.45	2.95184E-4
0.46888	0.57868					0.5865	0.00127					19.55	2.95183E-4
0.46186	2.30093					0.5895	0.00127					19.65	2.95183E-4
0.45796	0.33007					0.5925	0.00127					19.75	2.95182E-4
0.46135	2.04078					0.5955	0.00127					19.85	2.95182E-4
0.45476	0.87531					0.5985	0.00127					19.95	2.95181E-4
0.44404	0.3943
0.44273	1.37976
0.44798	1.91763
0.46631	0.36984
0.45146	0.54537
0.49208	0.33075
0.44828	0.2977
0.4534	1.41891
0.45968	0.75788
0.44779	1.60257
0.45292	1.0149
0.44956	0.33149
0.45492	0.41393
0.4755	0.37608
0.44437	0.71502
0.46646	0.78481
0.46264	0.8931
0.4586	1.12766
0.40722	0.68412
0.46431	0.86409
0.45558	1.11639
0.45521	0.48664
0.45533	0.99847
0.44681	1.70818
0.45453	0.97964
0.47781	0.28777
0.43677	1.08171
0.45415	0.53333
0.45546	0.69662
0.43781	0.50081
0.45928	1.084
0.44771	0.46268
0.49276	0.20201
0.45097	0.89982
0.43225	2.20859
0.45769	2.08371
0.4718	0.51112
0.4775	0.43162
0.45612	0.51367
0.44089	0.34183
0.46926	0.34426
0.45197	0.40625
0.21768	0.43852
0.51085	0.35043
0.45343	1.07064
0.49469	0.23046
0.44652	0.46031
0.45594	0.2184
0.46827	0.34199
0.46713	0.72195
0.48641	0.2228
0.46453	0.78953
0.44357	0.52615
0.46345	0.30675
0.45902	0.73726
0.4413	1.80228
0.43749	0.85897
0.44963	0.22554
0.4534	0.78621
0.44347	2.24376
0.44203	0.22706
0.43592	0.47883
0.44622	1.0849
0.44611	2.29091
0.47079	0.90006
0.45013	1.26547
0.43901	0.56266
0.45702	2.45093
0.45764	0.31474
0.46763	1.3171
0.4601	0.37471
0.4563	1.04803
0.4372	1.41977
0.44369	0.51389
0.44715	1.18867
0.44971	1.03029
0.4488	1.7098
0.47425	0.26646
0.44805	2.78089
0.44373	0.84859
0.47341	0.32209
0.49445	0.60506
0.44344	1.78993
0.46812	0.23766
0.44717	1.31138
0.44987	0.2821
0.47473	0.24222
0.44594	0.71868
0.45014	0.25494
0.46935	1.6808
0.46041	0.85236
0.48742	0.2631
0.456	1.34405
0.45107	3.24617
0.46297	1.42194
0.47092	0.24313
0.45167	0.21063
0.41337	0.71525
0.45689	1.77079
0.43458	1.37659
0.46402	0.88565
0.4525	1.38828
0.4958	0.23524
0.44357	0.62935
0.43223	0.33026
0.4596	1.98605
0.45377	0.74797
0.45254	0.63456
0.44929	1.55542
0.44707	1.69714
0.44516	0.97116
0.46643	0.61433
0.47301	0.24326
0.48841	0.77593
0.45927	0.29867
0.45498	0.41021
0.4506	0.4268
0.46732	0.29557
0.48572	0.22645
0.45179	1.10147
0.45713	2.38225
0.4645	0.81494
0.45632	0.66508
0.4511	2.29659
0.45147	0.7972
0.46428	0.40468
0.45821	0.3138
0.47079	0.7007
0.44059	1.2358
0.46052	1.12727
0.42538	0.72708
0.45775	1.52283
0.41564	0.30905
0.45471	0.43564
0.43941	1.01197
0.44599	0.21843
0.45504	1.52023
0.45785	0.63805
0.47181	0.29566
0.44998	1.62257
0.45344	1.34587
0.45623	1.25125
0.45324	1.35185
0.45776	0.70561
0.44525	1.42804
0.45397	0.62309
0.45448	2.05633
0.44942	1.27488
0.45064	1.26431
0.45242	1.57424
0.43707	1.30412
0.45874	2.01227
0.45226	1.32605
0.45019	1.21614
0.43906	0.5872
0.4702	0.51043
0.25242	0.38339
0.44928	1.12348
0.47687	0.35017
0.44625	0.48827
0.44709	0.57363
0.45804	0.66052
0.45262	1.10156
0.45232	0.72901
0.46216	0.46513
0.45209	2.12377
0.45391	0.7393
0.44404	2.39097
0.45072	1.84274
0.47677	0.20262
0.45659	0.68631
0.45676	0.98833
0.44734	1.94751
0.44843	0.54593
0.46072	1.04388
0.40062	2.59363
0.45161	0.95016
0.48521	0.29574
0.46202	2.31555
0.37484	0.45149
0.43772	1.12272
0.47523	0.2224
0.45995	0.878
0.44904	1.12477
0.56642	0.5033
0.44321	2.12618
0.46923	0.40369
0.45668	0.78177
0.45273	0.34741
0.4437	0.85244
0.45698	0.52805
0.45162	2.1673
0.48092	0.40913
0.45878	3.02508
0.45279	0.74746
0.46247	0.38279
0.47515	0.25034
0.44538	1.17928
0.43332	0.93931
0.45235	4.15253
0.44719	0.82305
0.44304	2.02559
0.46965	0.51704
0.45702	0.7665
0.4521	0.21811
0.4759	0.24126
0.4829	0.22535
0.45426	1.24129
0.45833	0.79985
0.44412	1.39797
0.44168	1.04062
0.458	0.34993
0.43964	0.52671
0.45777	1.03805
0.50325	0.58231
0.45494	1.34459
0.44151	0.78283
0.60072	1.80859
0.4558	1.6746
0.44392	6.03823
0.4478	2.6311
0.44858	1.36884
0.43371	1.29877
0.46948	0.63094
0.45649	1.41268
0.45095	1.8532
0.46597	0.71532
0.46579	0.62692
0.46232	0.27037
0.4511	0.65604
0.4587	0.74397
0.45597	0.87795
0.47373	0.29437
0.44558	0.30972
0.45472	1.19802
0.45711	0.92391
0.45654	0.71051
0.47511	0.37529
0.46877	0.35758
0.45975	0.71
0.44385	1.31254
0.4567	0.63864
0.45393	1.36108
0.46829	0.74935
0.4741	0.60764
0.47942	0.49196
0.46255	0.80274
0.50863	0.24068
0.45927	0.98236
0.46172	0.43346
0.44312	1.18953
0.44914	1.3127
0.44939	0.66442
0.45111	1.00588
0.46631	1.88893
0.45907	1.30523
0.46108	1.5565
0.4407	0.4033
0.45715	0.77891
0.44832	1.54859
0.45169	0.38382
0.46941	0.25002
0.46106	0.28222
0.44936	0.88646
0.45789	1.14335
0.40347	0.39607
0.45217	1.4226
0.48904	0.20699
0.46077	0.65213
0.45917	1.01752
0.47494	0.2628
0.4493	0.25714
0.45807	1.38992
0.45456	0.74258
0.4482	0.90345
0.47521	0.30714
0.45457	0.33524
0.44354	4.55455
0.45929	1.22526
0.45032	0.93125
0.46829	0.24206
0.4611	0.82744
0.45376	1.64606
0.46789	0.24752
0.45502	0.97853
0.65706	0.38966
0.45696	1.61778
0.44836	0.57458
0.44424	4.44777
0.46205	1.28305
0.44448	0.41215
0.48224	0.38607
0.43854	2.95206
0.44058	2.20242
0.45786	1.14249
0.43241	0.54764
0.47727	0.27931
0.45245	2.50809
0.45081	0.92894
0.40017	0.21471
0.46155	0.95377
0.44577	1.07305
0.46231	0.56527
0.4609	1.01035
0.45766	0.47706
0.46117	0.30966
0.46071	1.38663
0.4463	1.69566
0.46102	1.10432
0.4523	0.41357
0.45764	0.55612
0.48473	0.33165
0.46866	0.3841
0.45274	1.07888
0.45088	0.585
0.4509	0.36687
0.46589	0.84215
0.46384	0.30178
0.48224	0.24977
0.46335	0.28643
0.41725	0.53282
0.45717	0.79405
0.45475	0.76316
0.49758	0.27362
0.44478	0.50584
0.45721	0.28422
0.47295	0.22553
0.44782	2.91446
0.47356	0.24615
0.49209	0.3198
0.44956	0.86601
0.45377	2.48945
0.46848	0.36399
0.47037	0.32701
0.45659	0.76116
0.4644	0.50555
0.45076	0.7931
0.48243	0.37158
0.42574	0.54822
0.46114	0.35048
0.46056	2.74792
0.46829	0.31463
0.46656	0.36419
0.47743	0.63035
0.46603	0.39805
0.45824	2.75928
0.44191	0.62409
0.47495	0.49137
0.45245	0.72597
0.4475	0.60679
0.44565	0.88731
0.49243	0.20576
0.4727	0.21465
0.45297	1.2557
0.42432	0.23266
0.49433	0.251
0.46728	0.66949
0.46166	0.92303
0.46991	0.46613
0.45493	3.15784
0.447	0.8065
0.46801	0.48322
0.48592	0.31824
0.44227	0.56055
0.49177	0.49569
0.46401	0.73591
0.4488	3.46556
0.45357	0.87178
0.46187	0.34371
0.44255	0.53236
0.44644	0.73004
0.47382	0.32383
0.4526	0.47971
0.41966	1.02414
0.45029	2.82937
0.46221	1.05732
0.46919	0.31962
0.45187	0.45397
0.46378	0.25046
0.46219	0.80612
0.4628	1.04105
0.43981	1.509
0.47142	0.77627
0.4803	0.22629
0.47091	0.30879
0.48323	0.28045
0.43051	2.78687
0.46209	0.42753
0.45461	0.60281
0.4557	0.26071
0.45811	2.8798
0.4444	0.38647
0.45941	0.77929
0.47172	0.34604
0.45648	2.24798
0.46563	0.33045
0.47077	0.47091
0.43444	0.29775
0.49754	0.22665
0.4956	0.24208
0.46233	2.23114
0.43779	1.27388
0.44647	0.8535
0.46566	0.90875
0.46042	0.93838
0.15663	14.9774
0.44659	3.50119
0.4754	0.24798
0.45143	2.07738
0.49655	0.20703
0.45366	0.63563
0.45767	0.47689
0.44186	0.47945
0.47553	0.95952
0.4459	1.25412
0.44922	1.55591
0.4524	0.75507
0.47274	0.42062
0.44798	0.3261
0.47127	0.70563
0.46354	0.87903
0.44145	2.01486
0.45554	3.38244
0.43513	2.03215
0.45408	1.55776
0.45483	0.52705
0.44394	0.93915
0.44841	1.41873
0.45218	0.50715
0.45763	0.81056
0.46475	0.28322
0.44632	1.10902
0.4581	0.9182
0.41414	2.51183
0.45258	0.91187
0.45301	0.82971
0.46163	0.34512
0.43635	0.86966
0.46747	1.0257
0.46448	0.33805
0.45737	0.77413
0.46888	0.36729
0.44582	2.20651
0.4672	0.49024
0.45399	0.57437
0.4495	1.45699
0.44907	2.11007
0.43402	0.35656
0.47382	0.30173
0.45296	0.46286
0.44689	1.10408
0.45261	1.21111
0.45214	1.02045
0.45585	1.04427
0.44818	0.8543
0.44916	1.41935
0.47074	0.32324
0.46552	1.99954
0.45881	0.52102
0.46201	0.84634
0.4614	0.61769
0.4544	0.52644
0.47197	0.54609
0.46672	0.24719
0.44772	2.04711
0.4302	0.23758
0.4608	0.51894
0.48366	0.23832
0.46687	0.67044
0.4426	0.78758
0.5081	0.25817
0.46314	0.83341
0.47257	0.40082
0.44226	2.00029
0.45081	0.59852
0.44755	0.27929
0.44539	0.61139
0.4495	0.62724
0.44433	0.27912
0.46061	1.85123
0.44823	0.4692
0.47484	0.22303
0.4516	1.19808
0.45791	0.30085
0.45951	0.91343
0.45563	1.76162
0.44631	1.24606
0.45451	0.49793
0.46393	0.78619
0.46885	0.41701
0.45996	0.24317
0.44662	0.62282
0.46185	1.05166
0.45248	0.8807
0.44304	3.33221
0.47436	0.27779
0.44607	2.53167
0.45863	0.79654
0.45515	0.54255
0.46544	1.65539
0.46953	0.50684
0.44875	0.48673
0.45558	1.26345
0.48178	0.50533
0.44241	2.22718
0.4601	0.21842
0.45592	0.4157
0.44509	2.32659
0.45969	0.65819
0.43507	0.45451
0.44629	1.39061
0.43611	1.78775
0.4982	0.21908
0.45273	0.70726
0.44673	1.23936
0.45053	0.80464
0.44082	1.3841
0.45697	0.84733
0.45443	2.09631
0.45308	0.82778
0.45784	0.50796
0.45771	0.6401
0.44777	0.88687
0.44564	1.20679
0.45012	0.38123
0.45605	0.27471
0.44799	0.20744
0.44968	1.9689
0.45496	0.63875
0.45746	3.66701
0.4404	1.49336
0.45171	0.70623
0.46071	0.379
0.45113	1.1435
0.48938	0.20247
0.43538	0.83597
0.50489	0.25977
0.44869	1.37804
0.441	1.61577
0.45225	1.53945
0.471	0.23743
0.45954	1.82648
0.47497	0.31151
0.4624	0.86692
0.46489	0.83518
0.43841	1.00881
0.44324	0.80757
0.45331	0.67329
0.47023	0.47916
0.49303	0.23154
0.46777	0.25645
0.45229	1.17945
0.46708	0.64918
0.45473	0.52193
0.46396	0.35461
0.4379	0.77826
0.44845	0.84369
0.45658	0.36036
0.4423	1.11888
0.44755	0.67786
0.43631	1.87843
0.45007	0.77573
0.45312	0.27842
0.44895	1.70323
0.46842	0.34313
0.42608	0.35146
0.44839	0.98263
0.54918	0.31386
0.43608	1.76131
0.45476	0.60767
0.45373	0.52066
0.45206	3.91828
0.45121	0.36824
0.45289	1.51724
0.47495	0.56746
0.49682	0.2354
0.47197	0.25926
0.45572	1.41151
0.44628	1.68148
0.45288	2.23557
0.44838	0.77498
0.45898	0.96789
0.46114	1.16483
0.47422	0.6232
0.46889	0.39915
0.46573	0.35026
0.45493	1.38253
0.47937	0.27104
0.46909	0.58067
0.46343	0.85682
0.45517	0.3667
0.44846	1.24059
0.48215	0.53094
0.48431	0.26734
0.44458	0.33049
0.44518	0.53403
0.46515	0.61727
0.47766	0.52818
0.43967	1.1735
0.46009	1.40749
0.44273	0.46669
0.47051	0.40723
0.49252	0.20161
0.49586	0.21822
0.44867	4.94359
0.47664	0.50701
0.47012	0.77947
0.47339	0.31151
0.455	1.36878
0.45947	0.60961
0.70979	12.5275
0.45795	0.21094
0.44779	1.83711
0.47293	0.48751
0.46088	1.21257
0.43663	0.24707
0.44168	0.27122
0.45876	0.21924
0.45315	1.79861
0.44778	1.77454
0.452	1.02023
0.451	0.68996
0.45131	1.82772
0.44839	1.69912
0.44666	1.1125
0.45069	0.78705
0.48698	0.35827
0.47217	0.23303
0.45077	1.03556
0.4458	1.14855
0.45804	0.28982
0.45298	2.51069
0.46011	0.79485
0.47078	0.35254
0.46224	1.31942
0.47548	0.23672
0.41373	2.60365
0.46141	1.50347
0.46063	2.05106
0.42584	1.87143
0.4672	1.62057
0.47866	0.44346
0.45167	0.55072
0.45523	0.24838
0.45227	0.45793
0.45559	0.49401
0.45892	0.88642
0.46432	0.71563
0.44677	0.77555
0.4404	1.77438
0.4477	1.07393
0.45015	0.77888
0.9146	0.20958
0.42114	1.98961
0.4539	0.67384
0.43279	0.96743
0.44892	0.52709
0.46342	0.32684
0.4537	2.13978
0.50587	0.21977
0.47064	0.50997
0.46674	0.20252
0.41844	0.71169
0.44626	0.57563
0.46499	0.28658
0.45264	1.14327
0.44772	1.76244
0.46283	0.59476
0.46538	0.41021
0.45109	0.77521
0.45497	1.48026
0.45355	1.22327
0.44668	2.82821
0.45287	1.28317
0.40816	3.87206
0.45112	0.39864
0.44854	0.90369
0.44423	0.81718
0.45307	0.61233
0.46217	0.98635
0.4499	2.89315
0.45946	0.6956
0.45293	1.40573
0.4655	0.6205
0.45125	1.08625
0.44331	0.23646
0.46188	0.67463
0.45471	0.99509
0.48208	0.30632
0.48596	0.36285
0.46588	1.05044
0.46672	2.17262
0.45796	0.57134
0.45833	1.14094
0.44237	1.45628
0.49211	0.31862
0.44409	1.31032
0.45037	0.55048
0.47847	0.29546
0.47231	0.41092
0.45945	0.68866
0.44586	1.66701
0.4563	1.06822
0.45154	1.19989
0.46192	0.71205
0.45671	1.73887
0.4774	0.35211
0.44909	0.7379
0.47614	0.29148
0.4353	1.1697
0.47159	0.48034
0.43573	0.36316
0.46825	0.47375
0.43121	1.55567
0.45693	0.71873
0.46985	1.26742
0.43544	0.95873
0.43657	0.34764
0.48992	0.30155
0.44894	0.81194
0.4553	0.47819
0.4531	0.6968
0.46129	0.42626
0.45455	0.39663
0.45372	1.16627
0.44248	1.48692
0.45677	0.99152
0.47694	0.81333
0.45161	1.59627
0.44795	0.59173
0.46019	0.89859
0.45073	0.78637
0.46291	0.77806
0.46877	0.54639
0.45693	0.5592
0.49593	0.63864
0.45837	0.90302
0.44806	1.23636
0.45388	0.40197
0.44917	0.27153
0.45952	1.85368
0.47884	0.58283
0.44759	0.49047
0.46301	0.90269
0.38415	1.35257
0.45576	0.65262
0.46554	0.33067
0.45133	0.28727
0.45745	0.70575
0.44585	0.87425
0.47814	0.20993
0.45592	0.9659
0.43182	0.65031
0.44783	0.63564
0.45456	1.37903
0.44994	1.23238
0.44588	0.6164
0.47333	0.50663
0.45398	1.07771
0.45033	1.24972
0.45415	1.30115
0.45855	0.32463
0.47363	0.38649
0.4704	0.31228
0.4564	0.56271
0.45699	2.93257
0.41236	0.20802
0.45394	2.19148
0.45623	1.55557
0.37848	0.23742
0.45222	1.8569
0.4487	0.76035
0.47154	0.44976
0.44554	1.85826
0.46464	0.47484
0.4543	2.16352
0.46834	0.50017
0.46056	0.53859
0.49513	1.21076
0.50421	0.34656
0.45797	0.43785
0.4532	0.83529
0.4522	0.67099
0.45209	0.23623
0.45772	1.78301
0.41067	4.66032
0.48775	0.25695
0.45375	1.14508
0.46089	0.98764
0.45291	1.27121
0.46861	0.80845
0.45144	0.56814
0.48567	0.22407
0.46014	0.52446
0.46113	0.61539
0.4669	0.25016
0.4469	3.88621
0.46198	0.77667
0.43888	0.38838
0.36348	0.54739
0.44441	0.29262
0.44947	1.19198
0.45546	1.12024
0.45269	1.90696
0.48206	0.20938
0.46632	0.38014
0.46994	0.40525
0.45287	2.55045
0.44485	1.48965
0.44653	1.74052
0.46153	1.22728
0.46336	1.3061
0.46434	0.71396
0.47286	1.29816
0.46685	0.3311
0.45166	0.82821
0.46612	0.86198
0.45654	1.451
0.43941	2.82695
0.45535	0.46731
0.4964	0.25013
0.45696	0.39977
0.45014	1.32889
0.45471	1.70429
0.44863	0.49802
0.68	0.22646
0.46269	0.84147
0.45545	0.5744
0.46291	0.94509
0.46145	1.32883
0.46526	0.42492
0.44979	2.69794
0.4394	0.60248
0.4557	1.55587
0.45375	0.619
0.4542	1.28192
0.45428	1.09688
0.44802	0.67381
0.45302	0.87985
0.46448	0.60382
0.46159	0.84166
0.45898	0.61135
0.46385	0.74377
0.43634	1.10723
0.47157	0.30667
0.45819	0.40337
0.47254	0.26693
0.45535	1.05162
0.45706	0.77566
0.49192	0.22402
0.46046	0.50793
0.48048	0.26706
0.45203	0.81092
0.46752	1.43603
0.45499	0.23175
0.4513	0.87942
0.45272	0.94355
0.46083	0.49569
0.45043	1.53727
0.4989	0.20177
0.46222	1.21557
0.44665	1.32969
0.39834	0.21687
0.46814	0.43805
0.44125	0.48993
0.45693	1.90773
0.4637	0.57494
0.44952	0.44237
0.42176	0.41385
0.48828	0.28593
0.45394	1.31487
0.45285	0.53758
0.41783	1.30827
0.45033	1.58845
0.47358	0.32039
0.45529	0.91602
0.45442	0.76922
0.46721	0.31823
0.45477	2.29797
0.45334	0.74126
0.46067	0.37044
0.48194	0.31666
0.44347	1.7985
0.46209	0.98661
0.46489	1.54616
0.46301	2.23023
0.40965	1.13469
0.45144	3.37022
0.45978	1.00563
0.45183	0.83343
0.71081	0.26362
0.47198	0.26987
0.4488	0.87496
0.4845	0.25044
0.44603	0.61749
0.46033	0.23931
0.45951	1.00178
0.44907	0.70199
0.45636	1.4823
0.45579	1.48876
0.46373	0.22564
0.45161	2.40246
0.46923	0.98336
0.45702	1.03917
0.43035	1.37155
0.45394	0.67855
0.45907	0.4709
0.46444	0.86974
0.45077	1.04815
0.46892	0.84952
0.46307	0.6594
0.49286	0.26738
0.4431	0.91598
0.46376	1.03376
0.46395	0.35319
0.47278	0.26697
0.24357	0.23996
0.45686	0.35277
0.46407	0.45085
0.45738	1.02388
0.47689	0.31542
0.45778	1.53101
0.46029	0.59836
0.47431	0.29514
0.46452	0.39991
0.48957	0.30561
0.44542	0.88972
0.44133	0.99969
0.43823	2.43556
0.41459	0.80833
0.45896	0.98183
0.44912	1.03206
0.4642	0.76835
0.45018	1.40325
0.46478	0.8945
0.46482	0.27115
0.45448	3.05546
0.47048	0.2835
0.46605	1.10834
0.45907	2.00433
0.45583	0.3502
0.47428	0.46564
0.45528	0.87116
0.44769	1.4791
0.45871	0.36567
0.47796	0.21398
0.46634	0.33838
0.46144	0.99202
0.44064	1.03446
0.466	1.25154
0.45382	0.90945
0.46578	0.2352
0.45529	0.45419
0.44165	4.71375
0.44591	0.37223
0.44714	0.42761
0.45611	1.38884
0.40783	0.20991
0.45787	0.94594
0.49387	0.37252
0.47043	0.40236
0.4535	1.08498
0.45502	0.62651
0.47359	0.2184
0.46761	0.47921
0.47651	0.29038
0.4403	1.11863
0.46083	0.30977
0.45532	0.55206
0.47381	0.52809
0.44772	1.28689
0.45648	0.3677
0.4519	1.01436
0.45219	0.73567
0.41147	1.54635
0.52319	0.20171
0.48552	0.23163
0.4518	1.21477
0.48286	0.23352
0.41447	7.80517
0.45318	0.66879
0.46278	0.31776
0.46818	0.60363
0.45166	0.64382
0.44466	0.87401
0.48061	0.21864
0.43799	0.95596
0.44922	1.84379
0.46132	0.52835
0.46003	0.39467
0.45223	0.59409
0.46987	0.28726
0.47291	0.37578
0.70764	0.25636
0.43912	1.25187
0.47068	0.61365
0.45796	0.74465
0.45342	0.78298
[truncated: 14,540 more rows]

## Sheet: Fig. 5d
H31-10R2(Me) Scatter			BlockDepth histogram			Gaussian-fitting for BlockDepth			Restime histogram			LogNormal-fitting for Restime
BlockDepth	Restime (ms)		BlockDepth	Relative counts		BlockDepth	Relative counts		Restime (ms)	Relative counts		Restime (ms)	Relative counts
0.41321	0.50261		0.3015	1.47354E-4		0.3015	0.00135		0.05	0		0.05	0.00172
0.41645	0.7489		0.3045	1.47354E-4		0.30209	0.00135		0.15	0		0.06992	0.00557
0.42146	1.2325		0.3075	2.94707E-4		0.30239	0.00135		0.25	0.14721		0.08984	0.01273
0.4529	0.29513		0.3105	3.83119E-4		0.30269	0.00135		0.35	0.12204		0.10976	0.02275
0.41058	0.97191		0.3135	2.06295E-4		0.30299	0.00135		0.45	0.10172		0.12968	0.03464
0.40189	2.04783		0.3165	2.65236E-4		0.30328	0.00135		0.55	0.08796		0.1496	0.04735
0.42451	0.43251		0.3195	2.94707E-4		0.30358	0.00135		0.65	0.07271		0.15	0.04761
0.41725	1.60473		0.3225	5.89414E-4		0.30388	0.00135		0.75	0.06103		0.16952	0.05999
0.41752	0.54192		0.3255	7.95709E-4		0.30418	0.00135		0.85	0.05407		0.18944	0.0719
0.41335	1.90329		0.3285	5.30473E-4		0.30447	0.00135		0.95	0.04616		0.20936	0.08266
0.42097	0.22902		0.3315	0.00118		0.3045	0.00135		1.05	0.03975		0.22928	0.09201
0.42246	1.46685		0.3345	9.13592E-4		0.30477	0.00135		1.15	0.03276		0.2492	0.09988
0.4259	0.72135		0.3375	0.00124		0.30507	0.00135		1.25	0.0293		0.25	0.10016
0.46758	0.22671		0.3405	0.00112		0.30536	0.00135		1.35	0.02459		0.26912	0.10625
0.44206	0.57151		0.3435	0.001		0.30566	0.00135		1.45	0.02295		0.28904	0.11119
0.43726	0.33898		0.3465	0.00118		0.30596	0.00135		1.55	0.01932		0.30896	0.11481
0.42713	0.43941		0.3495	0.00168		0.30626	0.00135		1.65	0.01628		0.32888	0.11725
0.41369	1.85366		0.3525	0.00192		0.30655	0.00135		1.75	0.01373		0.3488	0.11863
0.62792	0.30088		0.3555	0.00127		0.30685	0.00135		1.85	0.012		0.35	0.11868
0.41022	1.07192		0.3585	0.00144		0.30715	0.00135		1.95	0.00998		0.36872	0.11909
0.40638	2.06407		0.3615	0.00156		0.30745	0.00135		2.05	0.00945		0.38864	0.11877
0.41408	0.37549		0.3645	0.00186		0.3075	0.00135		2.15	0.00787		0.40856	0.11778
0.41571	0.54067		0.3675	0.00283		0.30774	0.00135		2.25	0.00729		0.42848	0.11623
0.42148	1.64405		0.3705	0.0018		0.30804	0.00135		2.35	0.00635		0.4484	0.11423
0.40379	1.09616		0.3735	0.00256		0.30834	0.00135		2.45	0.00506		0.45	0.11405
0.40419	2.17972		0.3765	0.00321		0.30864	0.00135		2.55	0.00468		0.46832	0.11185
0.43176	0.28302		0.3795	0.0033		0.30893	0.00135		2.65	0.00395		0.48824	0.10919
0.40862	1.36864		0.3825	0.0038		0.30923	0.00135		2.75	0.00363		0.50816	0.1063
0.40577	0.40003		0.3855	0.00551		0.30953	0.00135		2.85	0.00354		0.52808	0.10324
0.62285	0.20007		0.3885	0.00513		0.30982	0.00135		2.95	0.00313		0.548	0.10007
0.4248	0.44678		0.3915	0.0071		0.31012	0.00135		3.05	0.00284		0.55	0.09974
0.41207	2.22408		0.3945	0.00849		0.31042	0.00135		3.15	0.00217		0.56792	0.09681
0.35051	0.65997		0.3975	0.01229		0.3105	0.00135		3.25	0.00196		0.58784	0.09352
0.40702	0.7989		0.4005	0.01739		0.31072	0.00135		3.35	0.00211		0.60776	0.09021
0.40694	2.61493		0.4035	0.02402		0.31101	0.00135		3.45	0.00167		0.62768	0.08691
0.38168	0.7219		0.4065	0.03339		0.31131	0.00135		3.55	0.00161		0.6476	0.08364
0.41956	0.53929		0.4095	0.04742		0.31161	0.00135		3.65	0.00105		0.65	0.08325
0.4088	1.35481		0.4125	0.06286		0.31191	0.00135		3.75	0.00135		0.66752	0.08043
0.41262	0.29614		0.4155	0.07332		0.3122	0.00135		3.85	0.0012		0.68744	0.07727
0.37211	1.13361		0.4185	0.08272		0.3125	0.00135		3.95	0.00105		0.70736	0.07418
0.41743	0.56622		0.4215	0.08673		0.3128	0.00135		4.05	8.19624E-4		0.72728	0.07118
0.39903	2.80711		0.4245	0.07984		0.31309	0.00135		4.15	9.07441E-4		0.7472	0.06825
0.4166	0.58622		0.4275	0.07244		0.31339	0.00135		4.25	8.48896E-4		0.75	0.06785
0.40692	1.67948		0.4305	0.06183		0.3135	0.00135		4.35	7.02535E-4		0.76712	0.06542
0.41752	1.44212		0.4335	0.05128		0.31369	0.00135		4.45	9.36713E-4		0.78704	0.06268
0.42673	0.67741		0.4365	0.04223		0.31399	0.00135		4.55	7.31807E-4		0.80696	0.06004
0.43525	0.35817		0.4395	0.03475		0.31428	0.00135		4.65	5.85446E-4		0.82688	0.05749
0.4057	1.02218		0.4425	0.02729		0.31458	0.00135		4.75	3.21995E-4		0.8468	0.05503
0.41528	0.94075		0.4455	0.02302		0.31488	0.00135		4.85	4.39084E-4		0.85	0.05465
0.36376	0.26165		0.4485	0.01771		0.31518	0.00135		4.95	4.09812E-4		0.86672	0.05267
0.39813	0.35435		0.4515	0.01665		0.31547	0.00135		5.05	4.68357E-4		0.88664	0.0504
0.41329	0.74523		0.4545	0.01247		0.31577	0.00135		5.15	3.8054E-4		0.90656	0.04823
0.42751	0.90873		0.4575	0.01055		0.31607	0.00135		5.25	4.68357E-4		0.92648	0.04614
0.44238	0.29747		0.4605	0.00943		0.31636	0.00135		5.35	4.39084E-4		0.9464	0.04414
0.38378	1.7871		0.4635	0.00713		0.3165	0.00135		5.45	3.51267E-4		0.95	0.04379
0.41117	0.57525		0.4665	0.00586		0.31666	0.00135		5.55	2.04906E-4		0.96632	0.04223
0.41966	0.23732		0.4695	0.0041		0.31696	0.00135		5.65	3.51267E-4		0.98624	0.0404
0.42069	0.43981		0.4725	0.00315		0.31726	0.00135		5.75	1.46361E-4		1.00616	0.03865
0.42231	1.02796		0.4755	0.00301		0.31755	0.00135		5.85	1.75634E-4		1.02608	0.03697
0.44172	0.30637		0.4785	0.00218		0.31785	0.00135		5.95	2.92723E-4		1.046	0.03537
0.41025	3.23772		0.4815	0.00162		0.31815	0.00135		6.05	1.75634E-4		1.05	0.03506
0.42199	0.42886		0.4845	0.0018		0.31845	0.00135		6.15	2.63451E-4		1.06592	0.03384
0.42574	0.78334		0.4875	9.72533E-4		0.31874	0.00135		6.25	2.04906E-4		1.08584	0.03238
0.38306	2.7964		0.4905	9.43063E-4		0.31904	0.00135		6.35	1.46361E-4		1.10576	0.03098
0.41912	0.92444		0.4935	5.89414E-4		0.31934	0.00135		6.45	1.46361E-4		1.12568	0.02965
0.3929	0.56985		0.4965	8.5465E-4		0.3195	0.00135		6.55	1.17089E-4		1.1456	0.02838
0.42539	0.82456		0.4995	3.83119E-4		0.31964	0.00135		6.65	2.04906E-4		1.15	0.0281
0.40299	0.80432		0.5025	3.83119E-4		0.31993	0.00135		6.75	8.78169E-5		1.16552	0.02716
0.41511	3.73842		0.5055	2.35766E-4		0.32023	0.00135		6.85	2.04906E-4		1.18544	0.026
0.40321	0.50702		0.5085	2.94707E-4		0.32053	0.00135		6.95	8.78169E-5		1.20536	0.0249
0.4427	0.35192		0.5115	2.35766E-4		0.32082	0.00135		7.05	5.85446E-5		1.22528	0.02384
0.41875	2.21059		0.5145	2.35766E-4		0.32112	0.00135		7.15	1.17089E-4		1.2452	0.02283
0.41164	0.5207		0.5175	0		0.32142	0.00135		7.25	1.17089E-4		1.25	0.0226
0.42309	0.51059		0.5205	2.06295E-4		0.32172	0.00135		7.35	2.92723E-5		1.26512	0.02187
0.43188	0.46744		0.5235	1.17883E-4		0.32201	0.00135		7.45	1.46361E-4		1.28504	0.02095
0.43487	0.32859		0.5265	8.84121E-5		0.32231	0.00135		7.55	8.78169E-5		1.30495	0.02008
0.40439	0.43919		0.5295	2.94707E-5		0.3225	0.00135		7.65	5.85446E-5		1.32487	0.01924
0.4165	0.74211		0.5325	8.84121E-5		0.32261	0.00135		7.75	1.17089E-4		1.34479	0.01844
0.41279	1.55113		0.5355	2.94707E-5		0.32291	0.00135		7.85	1.46361E-4		1.35	0.01824
0.43464	0.52097		0.5385	8.84121E-5		0.3232	0.00135		7.95	5.85446E-5		1.36471	0.01768
0.39399	0.66706		0.5415	5.89414E-5		0.3235	0.00135		8.05	0		1.38463	0.01696
0.42964	0.92376		0.5445	1.47354E-4		0.3238	0.00135		8.15	2.04906E-4		1.40455	0.01626
0.40084	1.66733		0.5475	8.84121E-5		0.32409	0.00135		8.25	2.92723E-5		1.42447	0.0156
0.3758	6.05859		0.5505	1.76824E-4		0.32439	0.00135		8.35	2.92723E-5		1.44439	0.01497
0.41851	1.00013		0.5535	8.84121E-5		0.32469	0.00135		8.45	5.85446E-5		1.45	0.0148
0.40555	1.98228		0.5565	5.89414E-5		0.32499	0.00135		8.55	8.78169E-5		1.46431	0.01436
0.42157	1.12379		0.5595	1.17883E-4		0.32528	0.00135		8.65	2.92723E-5		1.48423	0.01379
0.41329	0.28382		0.5625	8.84121E-5		0.3255	0.00135		8.75	8.78169E-5		1.50415	0.01324
0.40767	0.59586		0.5655	1.47354E-4		0.32558	0.00135		8.85	2.92723E-5		1.52407	0.01271
0.40721	2.2883		0.5685	8.84121E-5		0.32588	0.00135		8.95	0		1.54399	0.01221
0.41878	0.52719		0.5715	1.17883E-4		0.32618	0.00135		9.05	5.85446E-5		1.55	0.01206
0.41941	0.26492		0.5745	5.89414E-5		0.32647	0.00135		9.15	2.92723E-5		1.56391	0.01173
0.41442	0.83253		0.5775	8.84121E-5		0.32677	0.00135		9.25	5.85446E-5		1.58383	0.01127
0.41042	0.55783		0.5805	1.47354E-4		0.32707	0.00135		9.35	0		1.60375	0.01083
0.40867	1.08736		0.5835	8.84121E-5		0.32736	0.00135		9.45	2.92723E-5		1.62367	0.01041
0.40719	0.37387		0.5865	8.84121E-5		0.32766	0.00135		9.55	2.92723E-5		1.64359	0.01001
0.39479	0.34685		0.5895	1.47354E-4		0.32796	0.00135		9.65	2.92723E-5		1.65	0.00989
0.4132	1.07246		0.5925	8.84121E-5		0.32826	0.00135		9.75	5.85446E-5		1.66351	0.00963
0.41802	2.48684		0.5955	2.94707E-5		0.3285	0.00135		9.85	0		1.68343	0.00926
0.2583	0.41502		0.5985	8.84121E-5		0.32855	0.00135		9.95	2.92723E-5		1.70335	0.00891
0.41176	1.60956					0.32885	0.00135		10.05	8.78169E-5		1.72327	0.00858
0.41139	3.44829					0.32915	0.00135		10.15	0		1.74319	0.00826
0.42028	0.45478					0.32945	0.00135		10.25	0		1.75	0.00815
0.36623	0.49607					0.32974	0.00135		10.35	0		1.76311	0.00795
0.41994	1.09056					0.33004	0.00135		10.45	5.85446E-5		1.78303	0.00766
0.41435	0.48883					0.33034	0.00135		10.55	5.85446E-5		1.80295	0.00738
0.44641	0.38983					0.33064	0.00135		10.65	0		1.82287	0.00711
0.40497	1.61376					0.33093	0.00135		10.75	0		1.84279	0.00685
0.41085	1.55757					0.33123	0.00135		10.85	0		1.85	0.00676
0.40964	0.56884					0.3315	0.00135		10.95	0		1.86271	0.0066
0.40531	2.47863					0.33153	0.00135		11.05	2.92723E-5		1.88263	0.00637
0.44751	0.2786					0.33182	0.00135		11.15	2.92723E-5		1.90255	0.00614
0.41476	0.88902					0.33212	0.00135		11.25	0		1.92247	0.00592
0.38945	1.72798					0.33242	0.00135		11.35	2.92723E-5		1.94239	0.00572
0.38541	1.85881					0.33272	0.00135		11.45	5.85446E-5		1.95	0.00564
0.40839	2.05032					0.33301	0.00135		11.55	5.85446E-5		1.96231	0.00552
0.41263	3.16773					0.33331	0.00135		11.65	0		1.98223	0.00533
0.37311	0.61141					0.33361	0.00135		11.75	0		2.00215	0.00515
0.40169	0.45878					0.33391	0.00135		11.85	0		2.02207	0.00497
0.41351	0.69958					0.3342	0.00135		11.95	2.92723E-5		2.04199	0.0048
0.47884	0.45603					0.3345	0.00135		12.05	0		2.05	0.00474
0.41688	2.21897					0.3348	0.00135		12.15	8.78169E-5		2.06191	0.00464
0.40091	2.32277					0.33509	0.00135		12.25	2.92723E-5		2.08183	0.00449
0.43202	0.29853					0.33539	0.00135		12.35	0		2.10175	0.00434
0.46109	0.20563					0.33569	0.00135		12.45	0		2.12167	0.0042
0.43753	0.24676					0.33599	0.00135		12.55	2.92723E-5		2.14159	0.00406
0.4038	0.43129					0.33628	0.00135		12.65	0		2.15	0.004
0.42655	0.40136					0.33658	0.00135		12.75	0		2.16151	0.00393
0.42657	0.41426					0.33688	0.00135		12.85	2.92723E-5		2.18143	0.0038
0.41165	1.11325					0.33718	0.00135		12.95	5.85446E-5		2.20135	0.00368
0.40982	0.64027					0.33747	0.00135		13.05	2.92723E-5		2.22127	0.00357
0.41857	0.47901					0.3375	0.00135		13.15	0		2.24119	0.00345
0.41129	1.00381					0.33777	0.00135		13.25	2.92723E-5		2.25	0.00341
0.4425	0.29082					0.33807	0.00135		13.35	0		2.26111	0.00335
0.417	0.42688					0.33836	0.00135		13.45	0		2.28103	0.00324
0.40197	1.15434					0.33866	0.00135		13.55	0		2.30095	0.00315
0.42231	0.47026					0.33896	0.00135		13.65	0		2.32087	0.00305
0.42939	0.39303					0.33926	0.00135		13.75	0		2.34079	0.00296
0.4261	0.34825					0.33955	0.00135		13.85	0		2.35	0.00292
0.41933	0.33926					0.33985	0.00135		13.95	0		2.36071	0.00287
0.4494	0.28972					0.34015	0.00135		14.05	0		2.38063	0.00279
0.41252	0.79491					0.34045	0.00135		14.15	0		2.40055	0.00271
0.43793	0.33242					0.3405	0.00135		14.25	0		2.42047	0.00263
0.38623	0.37197					0.34074	0.00135		14.35	0		2.44039	0.00255
0.40063	0.66015					0.34104	0.00135		14.45	0		2.45	0.00252
0.6101	0.2564					0.34134	0.00135		14.55	2.92723E-5		2.46031	0.00248
0.41899	0.34216					0.34164	0.00135		14.65	0		2.48023	0.00241
0.40142	1.35453					0.34193	0.00135		14.75	0		2.50015	0.00234
0.42963	0.28092					0.34223	0.00135		14.85	0		2.52007	0.00228
0.33164	5.16435					0.34253	0.00135		14.95	0		2.53999	0.00222
0.42442	0.48386					0.34282	0.00135		15.05	2.92723E-5		2.55	0.00219
0.41165	0.58514					0.34312	0.00135		15.15	0		2.55991	0.00216
0.38812	1.35097					0.34342	0.00135		15.25	0		2.57983	0.0021
0.33114	0.85932					0.3435	0.00135		15.35	0		2.59975	0.00205
0.45214	0.35764					0.34372	0.00135		15.45	0		2.61967	0.00199
0.42547	1.05832					0.34401	0.00135		15.55	0		2.63959	0.00194
0.327	1.23454					0.34431	0.00135		15.65	0		2.65	0.00192
0.41569	2.14696					0.34461	0.00135		15.75	0		2.65951	0.00189
0.42139	0.67418					0.34491	0.00135		15.85	0		2.67943	0.00184
0.40024	0.49527					0.3452	0.00135		15.95	0		2.69935	0.0018
0.41037	1.01192					0.3455	0.00135		16.05	2.92723E-5		2.71927	0.00175
0.43168	0.45248					0.3458	0.00135		16.15	2.92723E-5		2.73919	0.00171
0.40294	0.52778					0.34609	0.00135		16.25	0		2.75	0.00169
0.40815	1.20903					0.34639	0.00135		16.35	0		2.75911	0.00167
0.4202	0.77678					0.3465	0.00135		16.45	0		2.77903	0.00163
0.42684	0.74232					0.34669	0.00135		16.55	0		2.79895	0.00159
0.41195	3.06455					0.34699	0.00135		16.65	0		2.81887	0.00156
0.43898	0.64697					0.34728	0.00135		16.75	0		2.83879	0.00152
0.40704	2.09095					0.34758	0.00135		16.85	0		2.85	0.0015
0.39062	2.73873					0.34788	0.00135		16.95	0		2.85871	0.00149
0.39067	1.71155					0.34818	0.00135		17.05	0		2.87863	0.00145
0.38527	3.50456					0.34847	0.00135		17.15	0		2.89855	0.00142
0.39174	0.55177					0.34877	0.00135		17.25	5.85446E-5		2.91847	0.00139
0.38415	0.61952					0.34907	0.00135		17.35	0		2.93839	0.00136
0.42254	1.14005					0.34936	0.00135		17.45	0		2.95	0.00134
0.40826	0.45854					0.3495	0.00135		17.55	0		2.95831	0.00133
0.41319	0.88003					0.34966	0.00135		17.65	2.92723E-5		2.97823	0.0013
0.43299	0.51146					0.34996	0.00135		17.75	2.92723E-5		2.99815	0.00128
0.40116	0.53643					0.35026	0.00135		17.85	0		3.01807	0.00125
0.40235	1.23118					0.35055	0.00135		17.95	0		3.03799	0.00123
0.45336	0.20698					0.35085	0.00135		18.05	0		3.05	0.00121
0.43067	0.49113					0.35115	0.00135		18.15	2.92723E-5		3.05791	0.0012
0.43798	0.53093					0.35145	0.00135		18.25	0		3.07783	0.00118
0.41213	0.39926					0.35174	0.00135		18.35	0		3.09775	0.00116
0.37544	1.74477					0.35204	0.00135		18.45	0		3.11767	0.00113
0.42104	1.08751					0.35234	0.00135		18.55	0		3.13759	0.00111
0.40677	0.43085					0.3525	0.00135		18.65	0		3.15	0.0011
0.42711	0.61509					0.35264	0.00135		18.75	0		3.15751	0.00109
0.41554	1.69621					0.35293	0.00135		18.85	2.92723E-5		3.17743	0.00107
0.43182	0.50446					0.35323	0.00135		18.95	0		3.19735	0.00105
0.40551	2.92288					0.35353	0.00135		19.05	0		3.21727	0.00104
0.41206	0.89129					0.35382	0.00135		19.15	0		3.23719	0.00102
0.43253	0.39822					0.35412	0.00135		19.25	0		3.25	0.00101
0.41102	1.39916					0.35442	0.00135		19.35	0		3.25711	0.001
0.41114	0.47352					0.35472	0.00135		19.45	0		3.27703	9.84957E-4
0.41349	2.46403					0.35501	0.00135		19.55	0		3.29695	9.68917E-4
0.39788	6.85375					0.35531	0.00135		19.65	0		3.31687	9.534E-4
0.41473	1.15459					0.3555	0.00135		19.75	0		3.33679	9.38389E-4
0.4752	0.2127					0.35561	0.00135		19.85	0		3.35	9.28702E-4
0.41762	0.63677					0.35591	0.00135		19.95	0		3.35671	9.23865E-4
0.42721	0.35488					0.3562	0.00135					3.37663	9.0981E-4
0.4224	0.73026					0.3565	0.00135					3.39655	8.96209E-4
0.41425	1.32474					0.3568	0.00135					3.41647	8.83044E-4
0.40519	1.36699					0.35709	0.00135					3.43639	8.70302E-4
0.40939	0.64173					0.35739	0.00135					3.45	8.61828E-4
0.40718	1.54995					0.35769	0.00135					3.45631	8.57966E-4
0.42222	0.63985					0.35799	0.00135					3.47623	8.46022E-4
0.42144	0.49514					0.35828	0.00135					3.49615	8.34458E-4
0.39776	1.93392					0.3585	0.00135					3.51607	8.23259E-4
0.41709	0.69157					0.35858	0.00135					3.53599	8.12413E-4
0.44942	0.23337					0.35888	0.00135					3.55	8.04988E-4
0.39641	0.93172					0.35918	0.00135					3.55591	8.01908E-4
0.42684	0.35943					0.35947	0.00135					3.57583	7.91732E-4
0.4099	1.84382					0.35977	0.00135					3.59575	7.81874E-4
0.40932	3.31614					0.36007	0.00135					3.61567	7.72323E-4
0.43938	0.2902					0.36036	0.00135					3.63559	7.63068E-4
0.41056	2.54036					0.36066	0.00135					3.65	7.56551E-4
0.41863	1.74305					0.36096	0.00135					3.65551	7.541E-4
0.40533	2.74966					0.36126	0.00135					3.67543	7.45408E-4
0.3856	2.53222					0.3615	0.00135					3.69535	7.36984E-4
0.41365	0.70725					0.36155	0.00135					3.71527	7.28817E-4
0.43529	0.34407					0.36185	0.00135					3.73519	7.20901E-4
0.43869	0.2137					0.36215	0.00135					3.75	7.1517E-4
0.40618	0.69768					0.36245	0.00135					3.75511	7.13225E-4
0.42187	0.75959					0.36274	0.00135					3.77503	7.05783E-4
0.43148	0.86356					0.36304	0.00135					3.79494	6.98566E-4
0.43742	0.3944					0.36334	0.00136					3.81486	6.91567E-4
0.41286	1.4279					0.36364	0.00136					3.83478	6.84779E-4
0.42184	0.9299					0.36393	0.00136					3.85	6.79732E-4
0.37082	0.2137					0.36423	0.00136					3.8547	6.78195E-4
0.43776	0.71105					0.3645	0.00136					3.87462	6.71807E-4
0.42854	0.28944					0.36453	0.00136					3.89454	6.6561E-4
0.40596	1.64922					0.36482	0.00136					3.91446	6.59598E-4
0.41049	0.40019					0.36512	0.00136					3.93438	6.53764E-4
0.41544	0.69651					0.36542	0.00136					3.95	6.49311E-4
0.42236	1.80697					0.36572	0.00136					3.9543	6.48102E-4
0.43177	0.30837					0.36601	0.00136					3.97422	6.42607E-4
0.4589	0.29589					0.36631	0.00136					3.99414	6.37274E-4
0.42606	0.51619					0.36661	0.00136					4.01406	6.32098E-4
0.42201	1.11593					0.36691	0.00136					4.03398	6.27072E-4
0.42032	0.22791					0.3672	0.00136					4.05	6.23138E-4
0.40793	0.4111					0.3675	0.00136					4.0539	6.22193E-4
0.40491	2.89725					0.3678	0.00136					4.07382	6.17456E-4
0.41665	1.42002					0.36809	0.00137					4.09374	6.12856E-4
0.4405	0.32759					0.36839	0.00137					4.11366	6.08389E-4
0.41498	1.41753					0.36869	0.00137					4.13358	6.04051E-4
0.41334	0.98126					0.36899	0.00137					4.15	6.0057E-4
0.41223	1.23813					0.36928	0.00137					4.1535	5.99838E-4
0.39724	0.8355					0.36958	0.00137					4.17342	5.95745E-4
0.4117	2.36839					0.36988	0.00137					4.19334	5.91769E-4
0.407	0.41943					0.37018	0.00138					4.21326	5.87906E-4
0.4094	1.20619					0.37047	0.00138					4.23318	5.84154E-4
0.42026	0.3847					0.3705	0.00138					4.25	5.81068E-4
0.41303	1.83521					0.37077	0.00138					4.2531	5.80507E-4
0.44535	0.24348					0.37107	0.00138					4.27302	5.76963E-4
0.42923	0.88288					0.37136	0.00139					4.29294	5.7352E-4
0.42982	0.2911					0.37166	0.00139					4.31286	5.70173E-4
0.41545	3.05424					0.37196	0.00139					4.33278	5.6692E-4
0.40707	1.21154					0.37226	0.0014					4.35	5.64181E-4
0.68747	0.21691					0.37255	0.0014					4.3527	5.63758E-4
0.41059	0.98053					0.37285	0.00141					4.37262	5.60684E-4
0.39814	0.72545					0.37315	0.00141					4.39254	5.57695E-4
0.42931	0.31656					0.37345	0.00142					4.41246	5.54789E-4
0.42491	0.26682					0.3735	0.00142					4.43238	5.51964E-4
0.41338	1.63309					0.37374	0.00142					4.45	5.4953E-4
0.46678	0.26317					0.37404	0.00143					4.4523	5.49216E-4
0.40943	0.42257					0.37434	0.00144					4.47222	5.46544E-4
0.43353	0.50721					0.37464	0.00144					4.49214	5.43945E-4
0.40021	1.31875					0.37493	0.00145					4.51206	5.41417E-4
0.39894	2.08055					0.37523	0.00146					4.53198	5.38958E-4
0.42624	0.48424					0.37553	0.00147					4.55	5.36792E-4
0.42535	0.32336					0.37582	0.00148					4.5519	5.36566E-4
0.41118	0.4673					0.37612	0.00149					4.57182	5.34239E-4
0.40741	1.37556					0.37642	0.0015					4.59174	5.31975E-4
0.4085	2.27286					0.3765	0.00151					4.61166	5.29772E-4
0.42753	1.21088					0.37672	0.00152					4.63158	5.27628E-4
0.4113	0.71629					0.37701	0.00153					4.65	5.25697E-4
0.43187	0.42185					0.37731	0.00154					4.6515	5.25542E-4
0.42554	0.38408					0.37761	0.00156					4.67142	5.23512E-4
0.40661	0.87957					0.37791	0.00158					4.69134	5.21536E-4
0.42586	0.41432					0.3782	0.00159					4.71126	5.19612E-4
0.43579	0.27132					0.3785	0.00161					4.73118	5.1774E-4
0.43605	0.92522					0.3788	0.00163					4.75	5.16016E-4
0.42443	0.42692					0.37909	0.00166					4.7511	5.15917E-4
0.37389	1.22892					0.37939	0.00168					4.77102	5.14142E-4
0.42033	0.66587					0.3795	0.00169					4.79094	5.12414E-4
0.46227	0.20002					0.37969	0.00171					4.81086	5.10732E-4
0.42437	0.45373					0.37999	0.00173					4.83078	5.09094E-4
0.40806	0.6805					0.38028	0.00176					4.85	5.07554E-4
0.41034	1.98021					0.38058	0.00179					4.8507	5.07498E-4
0.42099	1.43122					0.38088	0.00183					4.87062	5.05944E-4
0.42403	0.35768					0.38118	0.00186					4.89054	5.04431E-4
0.40272	0.40643					0.38147	0.0019					4.91046	5.02957E-4
0.45419	0.22245					0.38177	0.00194					4.93038	5.01521E-4
0.33424	1.41633					0.38207	0.00199					4.95	5.00143E-4
0.41581	1.23646					0.38236	0.00203					4.9503	5.00122E-4
0.41543	0.23562					0.3825	0.00206					4.97022	4.98759E-4
0.42409	0.80779					0.38266	0.00208					4.99014	4.97432E-4
0.423	0.53582					0.38296	0.00214					5.01006	4.96138E-4
0.41571	1.37641					0.38326	0.00219					5.02998	4.94877E-4
0.41858	1.12261					0.38355	0.00225					5.0499	4.93649E-4
0.42388	1.27434					0.38385	0.00231					5.05	4.93643E-4
0.40132	0.87803					0.38415	0.00238					5.06982	4.92452E-4
0.41196	1.78747					0.38445	0.00245					5.08974	4.91285E-4
0.40885	1.84618					0.38474	0.00253					5.10966	4.90147E-4
0.41354	0.72712					0.38504	0.00261					5.12958	4.89039E-4
0.3996	1.27628					0.38534	0.00269					5.1495	4.87958E-4
0.4196	0.23706					0.3855	0.00274					5.15	4.87931E-4
0.40266	1.5177					0.38564	0.00278					5.16942	4.86905E-4
0.44574	0.32559					0.38593	0.00288					5.18934	4.85878E-4
0.42221	0.59495					0.38623	0.00298					5.20926	4.84876E-4
0.42257	0.47778					0.38653	0.00309					5.22918	4.839E-4
0.42146	0.84323					0.38682	0.0032					5.2491	4.82948E-4
0.40877	5.68244					0.38712	0.00332					5.25	4.82906E-4
0.42661	1.17084					0.38742	0.00344					5.26902	4.8202E-4
0.41072	1.27912					0.38772	0.00358					5.28894	4.81114E-4
0.41016	0.49554					0.38801	0.00371					5.30886	4.80231E-4
0.40901	3.68965					0.38831	0.00386					5.32878	4.7937E-4
0.41785	0.43785					0.3885	0.00396					5.3487	4.7853E-4
0.40006	0.66033					0.38861	0.00402					5.35	4.78476E-4
0.43202	0.64445					0.38891	0.00418					5.36862	4.77711E-4
0.35095	0.55062					0.3892	0.00435					5.38854	4.76911E-4
0.42463	0.84702					0.3895	0.00453					5.40846	4.76132E-4
0.40914	1.19402					0.3898	0.00472					5.42838	4.75371E-4
0.43105	0.30234					0.39009	0.00492					5.4483	4.74628E-4
0.43669	0.70384					0.39039	0.00512					5.45	4.74566E-4
0.42918	0.32016					0.39069	0.00534					5.46822	4.73904E-4
0.40542	1.01807					0.39099	0.00557					5.48814	4.73197E-4
0.44137	0.26075					0.39128	0.00581					5.50806	4.72508E-4
0.40014	2.8327					0.3915	0.00599					5.52798	4.71835E-4
0.39967	1.85398					0.39158	0.00606					5.5479	4.71178E-4
0.41214	0.93791					0.39188	0.00632					5.55	4.71109E-4
0.42069	1.26881					0.39218	0.00659					5.56782	4.70537E-4
0.40452	1.81172					0.39247	0.00688					5.58774	4.69911E-4
0.46874	0.22456					0.39277	0.00717					5.60766	4.693E-4
0.41267	0.835					0.39307	0.00748					5.62758	4.68704E-4
0.41891	1.79672					0.39336	0.00781					5.6475	4.68122E-4
0.42623	0.81055					0.39366	0.00814					5.65	4.68049E-4
0.46399	0.20587					0.39396	0.00849					5.66742	4.67553E-4
0.41305	0.81197					0.39426	0.00886					5.68734	4.66998E-4
0.44907	0.23554					0.3945	0.00917					5.70726	4.66457E-4
0.42186	0.67507					0.39455	0.00924					5.72718	4.65928E-4
0.41408	1.05198					0.39485	0.00963					5.7471	4.65411E-4
0.41282	1.85486					0.39515	0.01004					5.75	4.65337E-4
0.33987	0.88893					0.39545	0.01047					5.76702	4.64906E-4
0.43071	0.32767					0.39574	0.01091					5.78694	4.64414E-4
0.43081	0.54781					0.39604	0.01136					5.80686	4.63933E-4
0.43143	0.70808					0.39634	0.01184					5.82678	4.63463E-4
0.42009	0.5362					0.39664	0.01233					5.8467	4.63004E-4
0.4187	1.20466					0.39693	0.01283					5.85	4.62929E-4
0.44683	0.25067					0.39723	0.01336					5.86662	4.62555E-4
0.42454	0.65848					0.3975	0.01385					5.88654	4.62117E-4
0.42264	0.70715					0.39753	0.0139					5.90646	4.61689E-4
0.42854	0.60122					0.39782	0.01446					5.92638	4.61271E-4
0.43694	0.56213					0.39812	0.01504					5.9463	4.60863E-4
0.42101	0.88438					0.39842	0.01563					5.95	4.60788E-4
0.39627	2.3127					0.39872	0.01624					5.96622	4.60464E-4
0.40034	2.13349					0.39901	0.01687					5.98614	4.60074E-4
0.41371	0.38174					0.39931	0.01752					6.00606	4.59693E-4
0.41115	1.51045					0.39961	0.01819					6.02598	4.5932E-4
0.40953	0.77497					0.39991	0.01888					6.0459	4.58957E-4
0.40909	1.44153					0.4002	0.01958					6.05	4.58883E-4
0.4214	0.47145					0.4005	0.02031					6.06582	4.58601E-4
0.42164	0.32551					0.4008	0.02105					6.08574	4.58253E-4
0.40094	2.56356					0.40109	0.02181					6.10566	4.57914E-4
0.40475	3.77508					0.40139	0.02259					6.12558	4.57582E-4
0.36576	1.3414					0.40169	0.02338					6.1455	4.57257E-4
0.41764	0.24666					0.40199	0.0242					6.15	4.57185E-4
0.4321	0.29037					0.40228	0.02503					6.16542	4.5694E-4
0.38085	1.06355					0.40258	0.02588					6.18534	4.5663E-4
0.36252	2.56157					0.40288	0.02674					6.20526	4.56326E-4
0.33609	12.8163					0.40318	0.02763					6.22518	4.5603E-4
0.4116	2.16701					0.40347	0.02853					6.2451	4.5574E-4
0.41222	1.21468					0.4035	0.02861					6.25	4.5567E-4
0.42851	0.54297					0.40377	0.02945					6.26502	4.55457E-4
0.40139	0.50457					0.40407	0.03038					6.28493	4.55179E-4
0.38119	0.86149					0.40436	0.03133					6.30485	4.54908E-4
0.40329	0.67829					0.40466	0.03229					6.32477	4.54643E-4
0.45752	0.21588					0.40496	0.03326					6.34469	4.54384E-4
0.40772	0.26679					0.40526	0.03426					6.35	4.54316E-4
0.42655	0.67796					0.40555	0.03526					6.36461	4.54131E-4
0.40629	0.37181					0.40585	0.03628					6.38453	4.53883E-4
0.43392	0.73679					0.40615	0.0373					6.40445	4.5364E-4
0.42955	0.42322					0.40645	0.03834					6.42437	4.53403E-4
0.40482	1.95933					0.4065	0.03853					6.44429	4.53171E-4
0.40134	0.2157					0.40674	0.03939					6.45	4.53106E-4
0.44761	0.26329					0.40704	0.04045					6.46421	4.52944E-4
0.44726	0.24355					0.40734	0.04152					6.48413	4.52722E-4
0.42251	0.29081					0.40764	0.04259					6.50405	4.52505E-4
0.39115	0.6853					0.40793	0.04367					6.52397	4.52292E-4
0.40612	2.92037					0.40823	0.04476					6.54389	4.52084E-4
0.43845	0.40239					0.40853	0.04585					6.55	4.52021E-4
0.42331	0.57098					0.40882	0.04694					6.56381	4.51881E-4
0.41971	1.40785					0.40912	0.04804					6.58373	4.51682E-4
0.42649	0.2749					0.40942	0.04914					6.60365	4.51487E-4
0.42358	0.48792					0.4095	0.04944					6.62357	4.51296E-4
0.40654	0.83401					0.40972	0.05024					6.64349	4.5111E-4
0.41976	0.93875					0.41001	0.05134					6.65	4.5105E-4
0.42341	0.26356					0.41031	0.05244					6.66341	4.50927E-4
0.43679	0.89889					0.41061	0.05353					6.68333	4.50748E-4
0.28616	0.23081					0.41091	0.05462					6.70325	4.50574E-4
0.45411	0.37067					0.4112	0.05571					6.72317	4.50402E-4
0.42314	0.32822					0.4115	0.05678					6.74309	4.50235E-4
0.39298	0.83782					0.4118	0.05785					6.75	4.50178E-4
0.41233	0.86255					0.41209	0.05891					6.76301	4.50071E-4
0.42541	0.36349					0.41239	0.05996					6.78293	4.4991E-4
0.40696	0.28286					0.4125	0.06034					6.80285	4.49753E-4
0.4315	1.05663					0.41269	0.061					6.82277	4.49599E-4
0.43248	0.34721					0.41299	0.06202					6.84269	4.49448E-4
0.41944	2.7674					0.41328	0.06303					6.85	4.49394E-4
0.42914	0.25424					0.41358	0.06403					6.86261	4.49301E-4
0.41224	1.07233					0.41388	0.065					6.88253	4.49157E-4
0.40929	2.13165					0.41418	0.06596					6.90245	4.49015E-4
0.44428	0.22766					0.41447	0.0669					6.92237	4.48877E-4
0.45524	0.23214					0.41477	0.06782					6.94229	4.48741E-4
0.41349	0.32361					0.41507	0.06871					6.95	4.48689E-4
0.41727	1.77804					0.41536	0.06958					6.96221	4.48608E-4
0.44837	0.32965					0.4155	0.06997					6.98213	4.48478E-4
0.4467	0.263					0.41566	0.07043					7.00205	4.48351E-4
0.41444	0.6088					0.41596	0.07125					7.02197	4.48226E-4
0.42111	0.55522					0.41626	0.07204					7.04189	4.48104E-4
0.43232	0.62644					0.41655	0.07281					7.05	4.48055E-4
0.40869	0.85135					0.41685	0.07355					7.06181	4.47984E-4
0.37443	0.28125					0.41715	0.07425					7.08173	4.47867E-4
0.40661	0.85977					0.41745	0.07493					7.10165	4.47752E-4
0.4099	1.05518					0.41774	0.07557					7.12157	4.4764E-4
0.43777	0.35862					0.41804	0.07618					7.14149	4.4753E-4
0.41821	0.93448					0.41834	0.07675					7.15	4.47483E-4
0.40445	1.83988					0.4185	0.07705					7.16141	4.47422E-4
0.43101	0.77428					0.41864	0.07729					7.18133	4.47316E-4
0.40644	0.87232					0.41893	0.07779					7.20125	4.47212E-4
0.46789	0.21953					0.41923	0.07826					7.22117	4.47111E-4
0.43467	0.37995					0.41953	0.07869					7.24109	4.47011E-4
0.4083	0.70946					0.41982	0.07908					7.25	4.46967E-4
0.40496	0.3508					0.42012	0.07943					7.26101	4.46914E-4
0.42165	0.28768					0.42042	0.07974					7.28093	4.46818E-4
0.42778	0.62617					0.42072	0.08002					7.30085	4.46725E-4
0.42741	0.91961					0.42101	0.08025					7.32077	4.46633E-4
0.41141	1.0641					0.42131	0.08044					7.34069	4.46543E-4
0.29085	0.59325					0.4215	0.08055					7.35	4.46502E-4
0.42963	0.23853					0.42161	0.0806					7.36061	4.46455E-4
0.40353	0.61076					0.42191	0.08071					7.38053	4.46369E-4
0.3974	0.65689					0.4222	0.08078					7.40045	4.46284E-4
0.41322	0.64343					0.4225	0.0808					7.42037	4.46201E-4
0.40229	2.34998					0.4228	0.08079					7.44029	4.4612E-4
0.41203	2.27232					0.42309	0.08074					7.45	4.46081E-4
0.39728	0.28655					0.42339	0.08064					7.46021	4.4604E-4
0.4358	1.51962					0.42369	0.0805					7.48013	4.45962E-4
0.40364	1.80236					0.42399	0.08033					7.50005	4.45885E-4
0.42295	1.84866					0.42428	0.08011					7.51997	4.4581E-4
0.40647	0.85539					0.4245	0.07992					7.53989	4.45737E-4
0.41007	2.67839					0.42458	0.07985					7.55	4.457E-4
0.38596	0.31369					0.42488	0.07955					7.55981	4.45665E-4
0.43139	0.55168					0.42518	0.07921					7.57973	4.45594E-4
0.41648	0.32947					0.42547	0.07883					7.59965	4.45525E-4
0.38849	0.31059					0.42577	0.07842					7.61957	4.45457E-4
0.48095	0.22883					0.42607	0.07797					7.63949	4.4539E-4
0.42171	0.32578					0.42636	0.07748					7.65	4.45355E-4
0.39726	1.68368					0.42666	0.07695					7.65941	4.45325E-4
0.43599	0.3194					0.42696	0.07639					7.67933	4.4526E-4
0.41663	0.57933					0.42726	0.07579					7.69925	4.45198E-4
0.42637	0.76382					0.4275	0.07528					7.71917	4.45136E-4
0.42682	0.53274					0.42755	0.07516					7.73909	4.45075E-4
0.52656	0.36314					0.42785	0.0745					7.75	4.45043E-4
0.39338	1.11109					0.42815	0.0738					7.75901	4.45016E-4
0.44822	0.49155					0.42845	0.07308					7.77893	4.44958E-4
0.4056	1.3695					0.42874	0.07232					7.79885	4.44901E-4
0.40627	0.47696					0.42904	0.07154					7.81877	4.44845E-4
0.40991	1.81901					0.42934	0.07073					7.83869	4.4479E-4
0.3918	8.84824					0.42964	0.06989					7.85	4.44759E-4
0.41912	2.11901					0.42993	0.06903					7.85861	4.44736E-4
0.47738	0.24064					0.43023	0.06814					7.87853	4.44683E-4
0.41507	1.03842					0.4305	0.06731					7.89845	4.44632E-4
0.42287	0.79903					0.43053	0.06723					7.91837	4.44581E-4
0.41862	0.53045					0.43082	0.0663					7.93829	4.44531E-4
0.47194	0.24457					0.43112	0.06535					7.95	4.44502E-4
0.41369	0.82315					0.43142	0.06438					7.95821	4.44482E-4
0.41033	0.7482					0.43172	0.06339					7.97813	4.44434E-4
0.40893	1.70225					0.43201	0.06239					7.99805	4.44387E-4
0.3914	0.59208					0.43231	0.06137					8.01797	4.44341E-4
0.33047	1.20262					0.43261	0.06034					8.03789	4.44295E-4
0.44177	0.3023					0.43291	0.05929					8.05	4.44268E-4
0.44653	0.26614					0.4332	0.05823					8.05781	4.44251E-4
0.39801	1.43043					0.4335	0.05717					8.07773	4.44207E-4
0.41211	0.93845					0.4338	0.05609					8.09765	4.44164E-4
0.40725	0.74308					0.43409	0.05501					8.11757	4.44122E-4
0.40547	0.87829					0.43439	0.05392					8.13749	4.44081E-4
0.43823	0.37967					0.43469	0.05283					8.15	4.44056E-4
0.42182	0.7166					0.43499	0.05174					8.15741	4.44041E-4
0.42655	0.98729					0.43528	0.05064					8.17733	4.44001E-4
0.42213	1.7584					0.43558	0.04954					8.19725	4.43962E-4
0.3828	0.65133					0.43588	0.04844					8.21717	4.43924E-4
0.44449	0.33004					0.43618	0.04734					8.23709	4.43886E-4
0.36629	2.36954					0.43647	0.04624					8.25	4.43862E-4
0.4288	0.26171					0.4365	0.04614					8.25701	4.43849E-4
0.46376	0.30253					0.43677	0.04515					8.27693	4.43813E-4
0.42066	0.2759					0.43707	0.04406					8.29685	4.43778E-4
0.45429	0.21009					0.43736	0.04298					8.31677	4.43743E-4
0.42828	0.59786					0.43766	0.0419					8.33669	4.43708E-4
0.42531	0.60367					0.43796	0.04083					8.35	4.43686E-4
0.40688	1.16402					0.43826	0.03977					8.35661	4.43675E-4
0.41478	0.5268					0.43855	0.03872					8.37653	4.43642E-4
0.42743	0.64376					0.43885	0.03767					8.39645	4.43609E-4
0.39183	1.40753					0.43915	0.03664					8.41637	4.43578E-4
0.40545	1.55457					0.43945	0.03562					8.43629	4.43546E-4
0.40242	0.24219					0.4395	0.03544					8.45	4.43525E-4
0.40561	0.39962					0.43974	0.03461					8.45621	4.43516E-4
0.4219	0.54287					0.44004	0.03362					8.47613	4.43486E-4
0.42915	0.61					0.44034	0.03264					8.49605	4.43456E-4
0.40474	1.31415					0.44064	0.03167					8.51597	4.43427E-4
0.40191	0.74753					0.44093	0.03072					8.53589	4.43399E-4
0.37588	2.13127					0.44123	0.02978					8.55	4.43379E-4
0.32584	1.20437					0.44153	0.02886					8.55581	4.43371E-4
0.39948	4.15951					0.44182	0.02795					8.57573	4.43343E-4
0.41433	1.6787					0.44212	0.02706					8.59565	4.43316E-4
0.4649	0.28193					0.44242	0.02619					8.61557	4.4329E-4
0.44879	0.32991					0.4425	0.02595					8.63549	4.43264E-4
0.40559	0.90175					0.44272	0.02533					8.65	4.43245E-4
0.39064	0.43741					0.44301	0.02449					8.65541	4.43238E-4
0.43126	0.31524					0.44331	0.02367					8.67533	4.43213E-4
0.41157	0.65475					0.44361	0.02287					8.69525	4.43188E-4
0.40219	1.59679					0.44391	0.02209					8.71517	4.43164E-4
0.42271	1.72378					0.4442	0.02132					8.73509	4.4314E-4
0.39865	0.54855					0.4445	0.02057					8.75	4.43123E-4
0.40957	0.57802					0.4448	0.01984					8.75501	4.43117E-4
0.37844	6.81123					0.44509	0.01913					8.77492	4.43094E-4
0.42533	1.23281					0.44539	0.01844					8.79484	4.43071E-4
0.43138	0.93802					0.4455	0.01819					8.81476	4.43049E-4
0.40663	0.64837					0.44569	0.01776					8.83468	4.43028E-4
0.42409	1.12938					0.44599	0.01711					8.85	4.43011E-4
0.42064	0.58204					0.44628	0.01647					8.8546	4.43006E-4
0.42983	0.35824					0.44658	0.01585					8.87452	4.42985E-4
0.40451	1.93154					0.44688	0.01525					8.89444	4.42965E-4
0.40858	1.01258					0.44718	0.01466					8.91436	4.42944E-4
0.41083	1.01452					0.44747	0.0141					8.93428	4.42924E-4
0.42189	0.36373					0.44777	0.01355					8.95	4.42909E-4
0.42114	0.88881					0.44807	0.01302					8.9542	4.42905E-4
0.40889	0.41176					0.44836	0.01251					8.97412	4.42886E-4
0.42109	0.51911					0.4485	0.01228					8.99404	4.42867E-4
0.4056	0.49286					0.44866	0.01201					9.01396	4.42848E-4
0.42087	1.94392					0.44896	0.01153					9.03388	4.4283E-4
0.42444	0.36822					0.44926	0.01107					9.05	4.42815E-4
0.41989	0.25972					0.44955	0.01062					9.0538	4.42812E-4
0.39955	1.17565					0.44985	0.01019					9.07372	4.42794E-4
0.41621	0.60739					0.45015	0.00978					9.09364	4.42777E-4
0.41545	0.37973					0.45045	0.00938					9.11356	4.4276E-4
0.40431	2.61936					0.45074	0.00899					9.13348	4.42743E-4
0.43002	0.79298					0.45104	0.00862					9.15	4.4273E-4
0.39963	0.37397					0.45134	0.00827					9.1534	4.42727E-4
0.41331	1.61952					0.4515	0.00808					9.17332	4.42711E-4
0.40559	1.88774					0.45164	0.00793					9.19324	4.42695E-4
0.42113	0.29987					0.45193	0.0076					9.21316	4.42679E-4
0.41951	1.44223					0.45223	0.00728					9.23308	4.42664E-4
0.4055	1.55662					0.45253	0.00698					9.25	4.42651E-4
0.43364	0.548					0.45282	0.00669					9.253	4.42649E-4
0.4371	0.20954					0.45312	0.00641					9.27292	4.42634E-4
0.66096	0.6262					0.45342	0.00615					9.29284	4.42619E-4
0.39884	0.34213					0.45372	0.0059					9.31276	4.42605E-4
0.43019	0.81246					0.45401	0.00565					9.33268	4.42591E-4
0.42789	0.33947					0.45431	0.00542					9.35	4.42579E-4
0.41704	2.18008					0.4545	0.00528					9.3526	4.42577E-4
0.42252	0.38872					0.45461	0.0052					9.37252	4.42563E-4
0.4057	1.13563					0.45491	0.00499					9.39244	4.4255E-4
0.41976	0.52166					0.4552	0.00479					9.41236	4.42537E-4
0.40236	1.02135					0.4555	0.0046					9.43228	4.42524E-4
0.41006	1.05118					0.4558	0.00441					9.45	4.42513E-4
0.40436	1.62932					0.45609	0.00424					9.4522	4.42511E-4
0.4795	1.63007					0.45639	0.00407					9.47212	4.42499E-4
0.40963	1.91931					0.45669	0.00392					9.49204	4.42486E-4
0.41116	0.4979					0.45699	0.00377					9.51196	4.42474E-4
0.41599	0.67076					0.45728	0.00362					9.53188	4.42462E-4
0.42365	0.7269					0.4575	0.00353					9.55	4.42452E-4
0.40428	1.30726					0.45758	0.00349					9.5518	4.42451E-4
0.41856	0.34308					0.45788	0.00336					9.57172	4.42439E-4
0.42097	0.84267					0.45818	0.00324					9.59164	4.42428E-4
0.38252	1.05442					0.45847	0.00313					9.61156	4.42417E-4
0.40862	1.32845					0.45877	0.00302					9.63148	4.42406E-4
0.28875	13.2642					0.45907	0.00292					9.65	4.42396E-4
0.43305	0.89212					0.45936	0.00282					9.6514	4.42395E-4
0.4601	0.2153					0.45966	0.00273					9.67132	4.42385E-4
0.44656	0.21047					0.45996	0.00264					9.69124	4.42374E-4
0.43961	0.23503					0.46026	0.00256					9.71116	4.42364E-4
0.40875	0.96778					0.4605	0.00249					9.73108	4.42354E-4
0.41448	1.73079					0.46055	0.00248					9.75	4.42345E-4
0.38205	0.51212					0.46085	0.00241					9.751	4.42344E-4
0.44796	0.20406					0.46115	0.00234					9.77092	4.42334E-4
0.38973	4.27604					0.46145	0.00227					9.79084	4.42325E-4
0.40647	0.48349					0.46174	0.00221					9.81076	4.42315E-4
0.4211	0.25388					0.46204	0.00216					9.83068	4.42306E-4
0.42251	0.66284					0.46234	0.0021					9.85	4.42297E-4
0.41489	1.31588					0.46264	0.00205					9.8506	4.42297E-4
0.42121	1.29635					0.46293	0.002					9.87052	4.42288E-4
0.4247	0.59297					0.46323	0.00196					9.89044	4.42279E-4
0.43094	0.62793					0.4635	0.00192					9.91036	4.42271E-4
0.40645	3.92797					0.46353	0.00192					9.93028	4.42262E-4
0.44301	0.38958					0.46382	0.00188					9.95	4.42254E-4
0.39856	3.13525					0.46412	0.00184					9.9502	4.42254E-4
0.42114	0.88281					0.46442	0.00181					9.97012	4.42245E-4
0.43125	0.461					0.46472	0.00177					9.99004	4.42237E-4
0.39565	1.10297					0.46501	0.00174					10.01	4.42229E-4
0.40624	2.74653					0.46531	0.00172					10.0299	4.42221E-4
0.39053	0.55533					0.46561	0.00169					10.0498	4.42214E-4
0.4036	3.98481					0.46591	0.00167					10.05	4.42214E-4
0.42267	0.25515					0.4662	0.00164					10.0697	4.42206E-4
0.40073	1.30129					0.4665	0.00162					10.0896	4.42199E-4
0.42102	0.26319					0.4668	0.0016					10.1096	4.42191E-4
0.38692	1.38658					0.46709	0.00158					10.1295	4.42184E-4
0.41329	0.26257					0.46739	0.00156					10.1494	4.42177E-4
0.41736	0.52432					0.46769	0.00155					10.15	4.42177E-4
0.41242	1.42668					0.46799	0.00153					10.1693	4.4217E-4
0.43415	0.28241					0.46828	0.00152					10.1892	4.42163E-4
0.40924	2.43413					0.46858	0.00151					10.2092	4.42156E-4
0.42838	0.57319					0.46888	0.0015					10.2291	4.42149E-4
0.407	1.07651					0.46918	0.00148					10.249	4.42143E-4
0.42243	1.09437					0.46947	0.00147					10.25	4.42142E-4
0.40817	2.18094					0.4695	0.00147					10.2689	4.42136E-4
0.42318	0.32837					0.46977	0.00146					10.2888	4.4213E-4
0.40137	3.09141					0.47007	0.00146					10.3088	4.42124E-4
0.46424	0.22701					0.47036	0.00145					10.3287	4.42118E-4
0.42774	0.59398					0.47066	0.00144					10.3486	4.42111E-4
0.45077	0.24616					0.47096	0.00143					10.35	4.42111E-4
0.4092	0.49462					0.47126	0.00143					10.3685	4.42105E-4
0.43921	0.21527					0.47155	0.00142					10.3884	4.421E-4
0.40118	0.37897					0.47185	0.00141					10.4084	4.42094E-4
0.40378	0.59068					0.47215	0.00141					10.4283	4.42088E-4
0.4125	1.65248					0.47245	0.0014					10.4482	4.42082E-4
0.40605	2.16603					0.4725	0.0014					10.45	4.42082E-4
0.41443	0.97328					0.47274	0.0014					10.4681	4.42077E-4
0.40699	1.26322					0.47304	0.0014					10.488	4.42071E-4
0.41625	1.66795					0.47334	0.00139					10.508	4.42066E-4
0.37096	0.66441					0.47364	0.00139					10.5279	4.42061E-4
0.41348	1.73122					0.47393	0.00139					10.5478	4.42056E-4
0.45044	0.29389					0.47423	0.00138					10.55	4.42055E-4
0.4211	0.75197					0.47453	0.00138					10.5677	4.42051E-4
0.41264	0.89286					0.47482	0.00138					10.5876	4.42045E-4
0.40238	1.05661					0.47512	0.00138					10.6076	4.42041E-4
0.41877	0.68827					0.47542	0.00137					10.6275	4.42036E-4
0.40848	3.44742					0.4755	0.00137					10.6474	4.42031E-4
0.34058	0.89481					0.47572	0.00137					10.65	4.4203E-4
0.41092	1.4117					0.47601	0.00137					10.6673	4.42026E-4
0.45074	0.36267					0.47631	0.00137					10.6872	4.42021E-4
0.42399	0.55235					0.47661	0.00137					10.7072	4.42017E-4
0.41119	1.17042					0.47691	0.00137					10.7271	4.42012E-4
0.41425	0.91094					0.4772	0.00136					10.747	4.42008E-4
0.41994	0.35532					0.4775	0.00136					10.75	4.42007E-4
0.40588	0.4682					0.4778	0.00136					10.7669	4.42004E-4
0.45217	0.28408					0.47809	0.00136					10.7868	4.41999E-4
0.40937	0.71708					0.47839	0.00136					10.8068	4.41995E-4
0.40555	1.22922					0.4785	0.00136					10.8267	4.41991E-4
0.41418	1.66824					0.47869	0.00136					10.8466	4.41987E-4
0.41016	0.67075					0.47899	0.00136					10.85	4.41986E-4
0.43085	0.36495					0.47928	0.00136					10.8665	4.41983E-4
0.40409	2.06495					0.47958	0.00136					10.8864	4.41979E-4
0.38689	3.28353					0.47988	0.00136					10.9064	4.41975E-4
0.42613	1.4089					0.48018	0.00136					10.9263	4.41971E-4
0.41417	0.38207					0.48047	0.00136					10.9462	4.41967E-4
0.41213	1.56356					0.48077	0.00136					10.95	4.41966E-4
0.41066	1.27903					0.48107	0.00136					10.9661	4.41963E-4
0.40375	1.53236					0.48136	0.00136					10.986	4.4196E-4
0.41794	1.62951					0.4815	0.00136					11.006	4.41956E-4
0.42269	0.67587					0.48166	0.00136					11.0259	4.41952E-4
0.4187	0.29936					0.48196	0.00135					11.0458	4.41949E-4
0.40159	3.12684					0.48226	0.00135					11.05	4.41948E-4
0.4082	0.28586					0.48255	0.00135					11.0657	4.41945E-4
0.40435	1.88643					0.48285	0.00135					11.0856	4.41942E-4
0.40887	0.77					0.48315	0.00135					11.1056	4.41939E-4
0.41819	0.85434					0.48345	0.00135					11.1255	4.41935E-4
0.40448	2.06748					0.48374	0.00135					11.1454	4.41932E-4
0.40699	0.4063					0.48404	0.00135					11.15	4.41931E-4
0.46634	0.4997					0.48434	0.00135					11.1653	4.41929E-4
0.42314	0.66435					0.4845	0.00135					11.1852	4.41925E-4
0.41606	0.64301					0.48464	0.00135					11.2052	4.41922E-4
0.41873	0.47438					0.48493	0.00135					11.2251	4.41919E-4
0.42532	0.53944					0.48523	0.00135					11.245	4.41916E-4
0.41476	0.57068					0.48553	0.00135					11.25	4.41915E-4
0.4319	0.5157					0.48582	0.00135					11.2649	4.41913E-4
0.4116	0.25949					0.48612	0.00135					11.2848	4.4191E-4
0.43819	0.62384					0.48642	0.00135					11.3048	4.41907E-4
0.41299	0.71009					0.48672	0.00135					11.3247	4.41905E-4
0.40981	0.65804					0.48701	0.00135					11.3446	4.41902E-4
0.40983	1.40674					0.48731	0.00135					11.35	4.41901E-4
0.43	2.25848					0.4875	0.00135					11.3645	4.41899E-4
0.41345	2.59253					0.48761	0.00135					11.3844	4.41896E-4
0.46264	0.20031					0.48791	0.00135					11.4044	4.41893E-4
0.41002	1.71412					0.4882	0.00135					11.4243	4.41891E-4
0.4225	0.80791					0.4885	0.00135					11.4442	4.41888E-4
0.42983	1.46249					0.4888	0.00135					11.45	4.41887E-4
0.42563	0.99935					0.48909	0.00135					11.4641	4.41886E-4
0.42992	0.39959					0.48939	0.00135					11.484	4.41883E-4
0.44687	0.33167					0.48969	0.00135					11.5039	4.41881E-4
0.43579	0.51906					0.48999	0.00135					11.5239	4.41878E-4
0.4089	1.56423					0.49028	0.00135					11.5438	4.41876E-4
0.40061	1.63476					0.4905	0.00135					11.55	4.41875E-4
0.40059	0.60282					0.49058	0.00135					11.5637	4.41873E-4
0.39835	0.20781					0.49088	0.00135					11.5836	4.41871E-4
0.42558	0.82766					0.49118	0.00135					11.6036	4.41869E-4
0.4135	1.65218					0.49147	0.00135					11.6235	4.41866E-4
0.41781	1.19968					0.49177	0.00135					11.6434	4.41864E-4
0.46161	0.23232					0.49207	0.00135					11.65	4.41863E-4
0.40713	1.76583					0.49236	0.00135					11.6633	4.41862E-4
0.39226	0.68324					0.49266	0.00135					11.6832	4.4186E-4
0.41328	0.7526					0.49296	0.00135					11.7032	4.41857E-4
0.40471	1.99849					0.49326	0.00135					11.7231	4.41855E-4
0.41364	1.17665					0.4935	0.00135					11.743	4.41853E-4
0.40884	1.00312					0.49355	0.00135					11.75	4.41852E-4
0.41722	0.93182					0.49385	0.00135					11.7629	4.41851E-4
0.38265	1.85456					0.49415	0.00135					11.7828	4.41849E-4
0.26893	0.23214					0.49445	0.00135					11.8027	4.41847E-4
0.41464	1.60739					0.49474	0.00135					11.8227	4.41845E-4
0.40915	2.32761					0.49504	0.00135					11.8426	4.41843E-4
0.39408	1.38383					0.49534	0.00135					11.85	4.41842E-4
0.40105	1.53686					0.49564	0.00135					11.8625	4.41841E-4
0.4109	1.17551					0.49593	0.00135					11.8824	4.41839E-4
0.37232	1.24348					0.49623	0.00135					11.9024	4.41837E-4
0.41575	0.81848					0.4965	0.00135					11.9223	4.41836E-4
0.39628	0.33451					0.49653	0.00135					11.9422	4.41834E-4
0.41061	1.53212					0.49682	0.00135					11.95	4.41833E-4
0.41424	0.42719					0.49712	0.00135					11.9621	4.41832E-4
0.40548	2.59924					0.49742	0.00135					11.982	4.4183E-4
0.42866	0.55823					0.49772	0.00135					12.002	4.41828E-4
0.43675	0.36327					0.49801	0.00135					12.0219	4.41827E-4
0.41061	0.28702					0.49831	0.00135					12.0418	4.41825E-4
0.38358	1.35631					0.49861	0.00135					12.05	4.41824E-4
0.39849	1.03719					0.49891	0.00135					12.0617	4.41823E-4
0.3964	3.12738					0.4992	0.00135					12.0816	4.41822E-4
0.4176	2.97031					0.4995	0.00135					12.1015	4.4182E-4
0.40422	1.77304					0.4998	0.00135					12.1215	4.41818E-4
0.43056	0.54625					0.50009	0.00135					12.1414	4.41817E-4
0.41279	0.61808					0.50039	0.00135					12.15	4.41816E-4
0.42867	0.39811					0.50069	0.00135					12.1613	4.41815E-4
0.42746	0.38827					0.50099	0.00135					12.1812	4.41814E-4
0.41362	0.33273					0.50128	0.00135					12.2012	4.41812E-4
0.42627	0.50254					0.50158	0.00135					12.2211	4.41811E-4
0.4605	0.24062					0.50188	0.00135					12.241	4.41809E-4
0.41071	1.23922					0.50218	0.00135					12.25	4.41809E-4
0.40265	0.67469					0.50247	0.00135					12.2609	4.41808E-4
0.43548	0.42689					0.5025	0.00135					12.2808	4.41806E-4
0.43047	1.07506					0.50277	0.00135					12.3008	4.41805E-4
0.41474	1.99473					0.50307	0.00135					12.3207	4.41804E-4
0.41802	0.22236					0.50336	0.00135					12.3406	4.41802E-4
0.43781	0.24319					0.50366	0.00135					12.35	4.41802E-4
0.4205	0.59282					0.50396	0.00135					12.3605	4.41801E-4
0.41628	0.71268					0.50426	0.00135					12.3804	4.418E-4
0.42949	0.23408					0.50455	0.00135					12.4003	4.41798E-4
0.41149	0.58083					0.50485	0.00135					12.4203	4.41797E-4
0.39773	1.00675					0.50515	0.00135					12.4402	4.41796E-4
0.40913	1.04709					0.50545	0.00135					12.45	4.41795E-4
0.42039	1.00354					0.5055	0.00135					12.4601	4.41794E-4
0.43075	0.81198					0.50574	0.00135					12.48	4.41793E-4
0.4013	2.05621					0.50604	0.00135					12.5	4.41792E-4
0.40972	2.65798					0.50634	0.00135					12.5199	4.41791E-4
0.41706	0.46463					0.50664	0.00135					12.5398	4.4179E-4
0.40652	1.17436					0.50693	0.00135					12.55	4.41789E-4
0.42722	0.25189					0.50723	0.00135					12.5597	4.41788E-4
0.42128	0.61063					0.50753	0.00135					12.5796	4.41787E-4
0.42378	0.7192					0.50782	0.00135					12.5996	4.41786E-4
0.44543	0.41862					0.50812	0.00135					12.6195	4.41785E-4
0.42774	0.71664					0.50842	0.00135					12.6394	4.41784E-4
0.43045	0.27927					0.5085	0.00135					12.65	4.41783E-4
0.42348	1.26717					0.50872	0.00135					12.6593	4.41783E-4
0.42922	0.2153					0.50901	0.00135					12.6792	4.41782E-4
0.43309	1.13556					0.50931	0.00135					12.6991	4.41781E-4
0.42246	0.5384					0.50961	0.00135					12.7191	4.41779E-4
0.4377	0.65614					0.50991	0.00135					12.739	4.41778E-4
0.41718	1.53543					0.5102	0.00135					12.75	4.41778E-4
0.3973	1.99883					0.5105	0.00135					12.7589	4.41777E-4
0.40709	1.06753					0.5108	0.00135					12.7788	4.41776E-4
0.4151	0.35482					0.51109	0.00135					12.7988	4.41775E-4
0.33023	3.05662					0.51139	0.00135					12.8187	4.41774E-4
0.42739	0.59447					0.5115	0.00135					12.8386	4.41773E-4
0.42969	0.68368					0.51169	0.00135					12.85	4.41773E-4
0.39458	0.38356					0.51199	0.00135					12.8585	4.41772E-4
0.86658	0.24093					0.51228	0.00135					12.8784	4.41772E-4
0.41783	1.14078					0.51258	0.00135					12.8984	4.41771E-4
0.41866	1.01862					0.51288	0.00135					12.9183	4.4177E-4
0.48503	0.33062					0.51318	0.00135					12.9382	4.41769E-4
0.40086	0.89508					0.51347	0.00135					12.95	4.41768E-4
0.52072	0.6012					0.51377	0.00135					12.9581	4.41768E-4
0.40534	0.71977					0.51407	0.00135					12.978	4.41767E-4
0.44282	0.73625					0.51436	0.00135					12.9979	4.41766E-4
0.4195	0.81198					0.5145	0.00135					13.0179	4.41765E-4
0.43616	0.24153					0.51466	0.00135					13.0378	4.41764E-4
0.43771	0.5266					0.51496	0.00135					13.05	4.41764E-4
0.42598	0.24718					0.51526	0.00135					13.0577	4.41764E-4
0.41954	0.66761					0.51555	0.00135					13.0776	4.41763E-4
0.40326	1.1761					0.51585	0.00135					13.0976	4.41762E-4
0.43928	0.29734					0.51615	0.00135					13.1175	4.41761E-4
0.4379	0.30649					0.51645	0.00135					13.1374	4.4176E-4
0.42627	0.22699					0.51674	0.00135					13.15	4.4176E-4
0.4161	0.29505					0.51704	0.00135					13.1573	4.4176E-4
0.46519	0.21445					0.51734	0.00135					13.1772	4.41759E-4
0.35436	1.07867					0.5175	0.00135					13.1972	4.41758E-4
0.41132	1.10851					0.51764	0.00135					13.2171	4.41757E-4
0.45982	0.21085					0.51793	0.00135					13.237	4.41756E-4
0.46251	0.23095					0.51823	0.00135					13.25	4.41756E-4
0.42688	0.29343					0.51853	0.00135					13.2569	4.41756E-4
0.38841	5.69109					0.51882	0.00135					13.2768	4.41755E-4
0.37375	1.16857					0.51912	0.00135					13.2967	4.41754E-4
0.34761	1.85819					0.51942	0.00135					13.3167	4.41754E-4
0.37575	1.53796					0.51972	0.00135					13.3366	4.41753E-4
0.41597	0.99998					0.52001	0.00135					13.35	4.41752E-4
0.43308	0.22491					0.52031	0.00135					13.3565	4.41752E-4
0.40897	1.22207					0.5205	0.00135					13.3764	4.41752E-4
0.39257	1.69593					0.52061	0.00135					13.3963	4.41751E-4
0.44407	0.36185					0.52091	0.00135					13.4163	4.4175E-4
0.4116	0.56836					0.5212	0.00135					13.4362	4.4175E-4
0.39722	0.90324					0.5215	0.00135					13.45	4.41749E-4
0.39974	3.86361					0.5218	0.00135					13.4561	4.41749E-4
0.46439	0.2257					0.52209	0.00135					13.476	4.41748E-4
0.44023	0.76211					0.52239	0.00135					13.496	4.41748E-4
0.423	0.29992					0.52269	0.00135					13.5159	4.41747E-4
0.40992	0.30538					0.52299	0.00135					13.5358	4.41746E-4
0.42154	1.19042					0.52328	0.00135					13.55	4.41746E-4
0.40304	1.95331					0.5235	0.00135					13.5557	4.41746E-4
0.4166	0.48332					0.52358	0.00135					13.5756	4.41745E-4
0.42179	0.33101					0.52388	0.00135					13.5955	4.41745E-4
0.41143	1.33662					0.52418	0.00135					13.6155	4.41744E-4
0.40367	1.29557					0.52447	0.00135					13.6354	4.41743E-4
0.45773	0.24635					0.52477	0.00135					13.65	4.41743E-4
0.40509	1.01642					0.52507	0.00135					13.6553	4.41743E-4
0.40123	2.46958					0.52536	0.00135					13.6752	4.41742E-4
0.42569	0.58259					0.52566	0.00135					13.6951	4.41742E-4
0.4146	1.3796					0.52596	0.00135					13.7151	4.41741E-4
0.41341	0.518					0.52626	0.00135					13.735	4.41741E-4
0.42383	0.41174					0.5265	0.00135					13.75	4.4174E-4
0.40174	0.77446					0.52655	0.00135					13.7549	4.4174E-4
0.43904	0.42737					0.52685	0.00135					13.7748	4.4174E-4
0.48799	0.73129					0.52715	0.00135					13.7947	4.41739E-4
0.43541	0.29364					0.52745	0.00135					13.8147	4.41739E-4
0.403	0.30024					0.52774	0.00135					13.8346	4.41738E-4
0.44135	0.29871					0.52804	0.00135					13.85	4.41738E-4
0.40174	0.77407					0.52834	0.00135					13.8545	4.41738E-4
0.40018	0.92327					0.52864	0.00135					13.8744	4.41737E-4
0.40624	2.99512					0.52893	0.00135					13.8943	4.41737E-4
0.39841	2.66958					0.52923	0.00135					13.9143	4.41736E-4
0.39941	0.70884					0.5295	0.00135					13.9342	4.41736E-4
0.38904	2.9503					0.52953	0.00135					13.95	4.41735E-4
0.41406	1.43066					0.52982	0.00135					13.9541	4.41735E-4
0.42948	0.37847					0.53012	0.00135					13.974	4.41735E-4
0.40722	1.45607					0.53042	0.00135					13.9939	4.41734E-4
0.43381	0.37575					0.53072	0.00135					14.0139	4.41734E-4
0.39108	0.5882					0.53101	0.00135					14.0338	4.41733E-4
0.45402	0.28746					0.53131	0.00135					14.05	4.41733E-4
0.41715	2.05665					0.53161	0.00135					14.0537	4.41733E-4
0.41406	0.45854					0.53191	0.00135					14.0736	4.41733E-4
0.41084	1.14079					0.5322	0.00135					14.0935	4.41732E-4
0.37454	2.43268					0.5325	0.00135					14.1135	4.41732E-4
0.42749	0.37041					0.5328	0.00135					14.1334	4.41731E-4
0.40823	1.04397					0.53309	0.00135					14.15	4.41731E-4
0.41197	0.41584					0.53339	0.00135					14.1533	4.41731E-4
0.41323	0.5529					0.53369	0.00135					14.1732	4.41731E-4
0.41602	0.37985					0.53399	0.00135					14.1931	4.4173E-4
0.40885	1.40741					0.53428	0.00135					14.2131	4.4173E-4
0.43007	0.35068					0.53458	0.00135					14.233	4.41729E-4
0.44126	0.3669					0.53488	0.00135					14.25	4.41729E-4
0.38924	0.2822					0.53518	0.00135					14.2529	4.41729E-4
0.42182	0.782					0.53547	0.00135					14.2728	4.41729E-4
0.4194	0.65533					0.5355	0.00135					14.2927	4.41728E-4
0.42945	0.30316					0.53577	0.00135					14.3127	4.41728E-4
0.41097	2.28241					0.53607	0.00135					14.3326	4.41727E-4
0.44832	0.22622					0.53636	0.00135					14.35	4.41727E-4
0.40544	2.55642					0.53666	0.00135					14.3525	4.41727E-4
0.35592	2.34647					0.53696	0.00135					14.3724	4.41727E-4
0.41914	2.1351					0.53726	0.00135					14.3923	4.41726E-4
0.45584	0.23267					0.53755	0.00135					14.4123	4.41726E-4
0.40461	1.16486					0.53785	0.00135					14.4322	4.41726E-4
0.43793	0.32456					0.53815	0.00135					14.45	4.41725E-4
0.41121	1.75557					0.53845	0.00135					14.4521	4.41725E-4
0.44758	0.23698					0.5385	0.00135					14.472	4.41725E-4
0.41522	0.6513					0.53874	0.00135					14.4919	4.41725E-4
0.41056	0.28028					0.53904	0.00135					14.5119	4.41724E-4
0.40096	3.07236					0.53934	0.00135					14.5318	4.41724E-4
0.39815	4.92416					0.53964	0.00135					14.55	4.41724E-4
0.3834	2.04013					0.53993	0.00135					14.5517	4.41724E-4
0.39604	1.12782					0.54023	0.00135					14.5716	4.41723E-4
0.4238	1.05501					0.54053	0.00135					14.5915	4.41723E-4
0.42179	2.27024					0.54082	0.00135					14.6115	4.41723E-4
0.41044	1.20322					0.54112	0.00135					14.6314	4.41722E-4
0.43802	0.35944					0.54142	0.00135					14.65	4.41722E-4
0.41373	0.5076					0.5415	0.00135					14.6513	4.41722E-4
0.39564	1.0933					0.54172	0.00135					14.6712	4.41722E-4
0.39931	0.47515					0.54201	0.00135					14.6911	4.41722E-4
0.41476	1.54366					0.54231	0.00135					14.7111	4.41721E-4
0.40675	0.61215					0.54261	0.00135					14.731	4.41721E-4
0.41048	2.44387					0.54291	0.00135					14.75	4.41721E-4
0.43081	0.34479					0.5432	0.00135					14.7509	4.41721E-4
0.40845	1.15507					0.5435	0.00135					14.7708	4.4172E-4
0.43879	0.30956					0.5438	0.00135					14.7907	4.4172E-4
0.40562	0.83516					0.54409	0.00135					14.8107	4.4172E-4
0.42491	1.12802					0.54439	0.00135					14.8306	4.4172E-4
0.41115	1.09261					0.5445	0.00135					14.85	4.41719E-4
0.38184	1.29555					0.54469	0.00135					14.8505	4.41719E-4
0.42562	0.39969					0.54499	0.00135					14.8704	4.41719E-4
0.44057	0.3182					0.54528	0.00135					14.8903	4.41719E-4
0.42028	1.28837					0.54558	0.00135					14.9103	4.41719E-4
0.43209	0.89135					0.54588	0.00135					14.9302	4.41718E-4
0.45868	0.20361					0.54618	0.00135					14.95	4.41718E-4
0.42556	0.33066					0.54647	0.00135					14.9501	4.41718E-4
0.41148	2.03909					0.54677	0.00135					14.97	4.41718E-4
0.44518	0.4518					0.54707	0.00135					14.9899	4.41718E-4
0.42768	0.98744					0.54736	0.00135					15.0099	4.41717E-4
0.44414	0.24685					0.5475	0.00135					15.0298	4.41717E-4
0.41767	0.41089					0.54766	0.00135					15.0497	4.41717E-4
0.43105	0.48723					0.54796	0.00135					15.05	4.41717E-4
0.41426	0.86839					0.54826	0.00135					15.0696	4.41717E-4
0.40314	1.263					0.54855	0.00135					15.0895	4.41716E-4
0.43867	0.37855					0.54885	0.00135					15.1095	4.41716E-4
0.41108	1.00218					0.54915	0.00135					15.1294	4.41716E-4
0.40225	0.50016					0.54945	0.00135					15.1493	4.41716E-4
0.3996	0.80151					0.54974	0.00135					15.15	4.41716E-4
0.41336	0.80124					0.55004	0.00135					15.1692	4.41716E-4
0.41146	0.83708					0.55034	0.00135					15.1891	4.41715E-4
0.42564	0.43525					0.5505	0.00135					15.2091	4.41715E-4
0.39677	1.74753					0.55064	0.00135					15.229	4.41715E-4
0.42746	0.46329					0.55093	0.00135					15.2489	4.41715E-4
0.41211	0.74249					0.55123	0.00135					15.25	4.41715E-4
0.41512	0.69243					0.55153	0.00135					15.2688	4.41714E-4
0.40813	1.81506					0.55182	0.00135					15.2887	4.41714E-4
0.37788	0.63457					0.55212	0.00135					15.3087	4.41714E-4
0.4104	0.78341					0.55242	0.00135					15.3286	4.41714E-4
0.42197	0.49119					0.55272	0.00135					15.3485	4.41714E-4
0.43348	0.45177					0.55301	0.00135					15.35	4.41714E-4
0.43785	0.32447					0.55331	0.00135					15.3684	4.41714E-4
0.4346	0.55837					0.5535	0.00135					15.3883	4.41713E-4
0.43257	0.2954					0.55361	0.00135					15.4083	4.41713E-4
0.42978	0.26685					0.55391	0.00135					15.4282	4.41713E-4
0.40396	0.4199					0.5542	0.00135					15.4481	4.41713E-4
0.42503	0.82479					0.5545	0.00135					15.45	4.41713E-4
0.41254	1.34751					0.5548	0.00135					15.468	4.41713E-4
0.38063	0.22321					0.55509	0.00135					15.4879	4.41712E-4
0.33087	0.28177					0.55539	0.00135					15.5079	4.41712E-4
0.42021	1.52449					0.55569	0.00135					15.5278	4.41712E-4
0.47144	0.33878					0.55599	0.00135					15.5477	4.41712E-4
0.41482	0.4707					0.55628	0.00135					15.55	4.41712E-4
0.41094	2.90134					0.5565	0.00135					15.5676	4.41712E-4
0.41401	0.87247					0.55658	0.00135					15.5875	4.41712E-4
0.45442	0.2427					0.55688	0.00135					15.6075	4.41711E-4
0.41278	1.14605					0.55718	0.00135					15.6274	4.41711E-4
0.40104	2.07544					0.55747	0.00135					15.6473	4.41711E-4
0.4096	0.46145					0.55777	0.00135					15.65	4.41711E-4
0.43236	0.75345					0.55807	0.00135					15.6672	4.41711E-4
0.41897	1.81973					0.55836	0.00135					15.6871	4.41711E-4
0.37294	3.96185					0.55866	0.00135					15.7071	4.41711E-4
0.39986	0.58228					0.55896	0.00135					15.727	4.4171E-4
0.36216	2.7156					0.55926	0.00135					15.7469	4.4171E-4
0.42729	0.41949					0.5595	0.00135					15.75	4.4171E-4
0.41223	1.28439					0.55955	0.00135					15.7668	4.4171E-4
0.42322	0.7946					0.55985	0.00135					15.7867	4.4171E-4
0.40927	1.39873					0.56015	0.00135					15.8067	4.4171E-4
0.46608	0.24779					0.56045	0.00135					15.8266	4.4171E-4
0.41963	0.84944					0.56074	0.00135					15.8465	4.41709E-4
0.43592	0.24154					0.56104	0.00135					15.85	4.41709E-4
0.42544	0.44753					0.56134	0.00135					15.8664	4.41709E-4
0.41174	0.80892					0.56164	0.00135					15.8863	4.41709E-4
0.4044	0.48908					0.56193	0.00135					15.9063	4.41709E-4
0.4022	1.48565					0.56223	0.00135					15.9262	4.41709E-4
0.43385	0.39537					0.5625	0.00135					15.9461	4.41709E-4
0.42003	4.67638					0.56253	0.00135					15.95	4.41709E-4
0.39909	1.36782					0.56282	0.00135					15.966	4.41709E-4
0.40313	0.75553					0.56312	0.00135					15.9859	4.41708E-4
0.42226	0.98749					0.56342	0.00135					16.05	4.41708E-4
0.40621	0.54074					0.56372	0.00135					16.15	4.41707E-4
0.46417	0.22731					0.56401	0.00135					16.25	4.41707E-4
0.41332	0.76367					0.56431	0.00135					16.35	4.41706E-4
0.41427	0.57033					0.56461	0.00135					16.45	4.41706E-4
0.39478	0.28659					0.56491	0.00135					16.55	4.41705E-4
0.39976	0.62374					0.5652	0.00135					16.65	4.41705E-4
0.42392	0.95121					0.5655	0.00135					16.75	4.41704E-4
0.38616	0.68065					0.5658	0.00135					16.85	4.41704E-4
0.39825	0.61991					0.56609	0.00135					16.95	4.41704E-4
0.3937	8.12058					0.56639	0.00135					17.05	4.41703E-4
0.37213	0.44436					0.56669	0.00135					17.15	4.41703E-4
0.41438	0.63416					0.56699	0.00135					17.25	4.41702E-4
0.449	0.34123					0.56728	0.00135					17.35	4.41702E-4
0.42784	0.57894					0.56758	0.00135					17.45	4.41702E-4
0.41382	0.24239					0.56788	0.00135					17.55	4.41702E-4
0.40641	1.89351					0.56818	0.00135					17.65	4.41701E-4
0.4459	0.34288					0.56847	0.00135					17.75	4.41701E-4
0.42917	0.79782					0.5685	0.00135					17.85	4.41701E-4
0.39381	1.16369					0.56877	0.00135					17.95	4.417E-4
0.41626	1.43172					0.56907	0.00135					18.05	4.417E-4
0.43826	0.27276					0.56936	0.00135					18.15	4.417E-4
0.42358	0.27732					0.56966	0.00135					18.25	4.417E-4
0.43575	0.21783					0.56996	0.00135					18.35	4.417E-4
0.40656	1.23082					0.57026	0.00135					18.45	4.41699E-4
0.37528	0.77899					0.57055	0.00135					18.55	4.41699E-4
0.41706	1.00663					0.57085	0.00135					18.65	4.41699E-4
0.43397	1.16338					0.57115	0.00135					18.75	4.41699E-4
0.4191	0.53086					0.57145	0.00135					18.85	4.41699E-4
0.44849	0.22652					0.5715	0.00135					18.95	4.41699E-4
0.40414	1.44397					0.57174	0.00135					19.05	4.41699E-4
0.41671	0.43177					0.5745	0.00135					19.15	4.41698E-4
0.43538	0.2302					0.5775	0.00135					19.25	4.41698E-4
0.42438	1.30018					0.5805	0.00135					19.35	4.41698E-4
0.35714	1.15613					0.5835	0.00135					19.45	4.41698E-4
0.41685	0.65929					0.5865	0.00135					19.55	4.41698E-4
0.41148	1.87164					0.5895	0.00135					19.65	4.41698E-4
0.41984	0.53496					0.5925	0.00135					19.75	4.41698E-4
0.41124	0.9569					0.5955	0.00135					19.85	4.41698E-4
0.4459	0.32066					0.5985	0.00135					19.95	4.41698E-4
0.42076	0.83717
0.4189	2.079
0.4272	0.40293
0.41755	1.21979
0.42	0.85705
0.41309	1.17355
0.40129	0.70679
0.41783	1.42894
0.42778	0.88246
0.39656	2.13615
0.42349	0.77555
0.41724	0.45182
0.41262	0.3951
0.41422	0.25741
0.39879	2.00545
0.40989	0.63038
0.4129	0.98979
0.40734	0.70023
0.39156	0.49445
0.42276	0.38374
0.40929	0.58283
0.4233	0.63991
0.4175	0.39564
0.44928	0.40646
0.42992	0.41517
0.40934	0.51075
0.3654	0.23983
0.41438	2.83647
0.42767	0.40722
0.40442	1.31464
0.38667	0.68623
0.42416	0.79861
0.4024	1.14599
0.41272	0.98768
0.42425	0.20871
0.41557	0.34831
0.4252	0.40656
0.35907	2.36774
0.41425	0.79909
0.49751	1.85161
0.40011	1.65498
0.4044	1.43852
0.45991	0.22199
0.44171	0.48269
0.44315	0.42858
0.41814	0.3704
0.44359	0.28871
0.43124	3.03704
0.44659	0.23313
0.44155	0.45312
0.40378	2.30504
0.40987	0.74351
0.43889	0.43174
0.41163	0.20021
0.41612	0.57699
0.40115	0.54243
0.4364	0.53308
0.40656	0.40615
0.45836	0.21599
0.4219	0.72482
0.42611	0.40002
0.42431	0.70516
0.41427	0.39143
0.41176	1.05846
0.398	0.78426
0.46062	0.25587
0.40915	1.13741
0.44774	0.22291
0.40346	1.38449
0.41288	1.39862
0.41807	0.51264
0.41578	0.98493
0.40112	7.78369
0.41091	0.39975
0.42272	0.41721
0.39904	0.67172
0.44186	0.31394
0.42107	1.88858
0.43742	0.57227
0.4204	0.3193
0.42433	0.4284
0.45251	0.32341
0.40914	1.06125
0.40889	0.74345
0.40118	0.73597
0.41244	1.31277
0.4227	1.07141
0.41481	1.55142
0.41144	0.46864
0.39016	0.37003
0.41107	0.50685
0.49568	2.87085
0.436	0.86524
0.48369	0.32719
0.43939	1.03944
0.52505	0.29755
0.62943	0.24033
0.41921	0.51603
0.34826	0.60753
0.41812	1.00639
0.43411	0.24529
0.41168	1.35526
0.41296	1.77543
0.42223	0.99263
0.42334	0.52707
0.41481	1.07486
0.40995	0.31452
0.40693	0.42064
0.42988	0.30441
0.41617	1.60474
0.41167	0.57842
0.42126	0.36928
0.40236	0.5816
0.3681	0.54771
0.41433	0.8503
0.40755	1.05949
0.4255	1.40417
0.42544	0.78654
0.43708	0.49446
0.41972	0.61496
0.38309	0.41494
0.41566	1.05703
0.43759	0.4156
0.45839	0.33965
0.40161	1.99767
0.44613	0.33534
0.40528	3.87523
0.46067	0.21507
0.39556	1.36475
0.42386	1.1664
0.41774	0.44169
0.40838	0.53855
0.38505	1.29948
0.43367	0.42431
0.44278	0.30431
0.39257	0.30721
0.39982	0.33908
0.41752	0.7882
0.39338	0.89539
0.47441	0.22981
0.43175	0.23551
0.42162	0.66688
0.39302	1.379
0.41282	1.10329
0.41043	0.8776
0.41966	0.41358
0.40861	0.64118
0.40767	0.78018
0.44512	0.20292
0.42611	0.39262
0.41588	0.62752
0.40431	0.44802
0.42606	0.43196
0.41752	0.77289
0.43129	0.57302
0.40882	0.90831
0.39266	0.70613
0.4289	0.49907
0.42582	0.30011
0.42173	0.54124
0.41332	1.56358
0.40925	0.46017
0.4139	0.8469
0.41693	0.7794
0.40726	0.99163
0.41863	1.11551
0.39535	0.90787
0.39659	0.31523
0.41263	1.39305
0.43369	0.91633
0.4397	0.23534
0.4367	0.49082
0.40888	1.0638
0.40254	1.00409
0.4163	0.80821
0.4006	0.7569
0.42036	2.11628
0.42732	0.66429
0.38842	1.28667
0.37607	0.85205
0.41841	1.10801
0.41484	0.79568
0.42211	0.63654
0.41077	0.99045
0.42279	1.54038
0.42353	0.33921
0.45182	0.31923
0.41005	0.3682
0.41356	0.42042
0.40163	3.38744
0.43312	0.40729
0.43962	0.49942
0.40733	0.74794
0.40341	0.8841
0.42007	3.36234
0.4091	0.54842
0.39344	0.73124
0.40385	0.91991
0.40799	1.8553
0.87324	0.25046
0.44885	0.20164
0.43183	0.57783
0.41073	0.3672
0.41559	2.08666
0.41949	0.32796
0.42093	0.34391
0.40395	1.52741
0.41686	1.97859
0.43356	0.7542
0.41681	0.33816
0.39438	1.01936
0.39954	0.65814
0.41119	1.82638
0.40825	1.26754
0.42034	2.9202
0.42164	1.31991
0.41706	0.66638
0.4164	0.43878
0.39389	1.04588
0.42218	0.29855
0.40962	1.03286
0.40245	0.90864
0.42316	0.55822
0.41995	0.58912
0.3994	0.82647
0.46107	0.21063
0.42441	1.02915
0.41848	0.90946
0.42053	0.34267
0.4166	0.51144
0.42036	2.64097
0.42703	0.43528
0.44584	0.22357
0.41916	1.44204
0.39662	0.32136
0.43017	0.97945
0.42097	0.34279
0.40281	2.81938
0.41879	0.62246
0.39348	0.98384
0.42068	0.90803
0.43007	0.3932
0.40288	0.34649
0.44272	0.2824
0.41098	0.47204
0.42487	1.03334
0.42606	0.84017
0.41268	0.37197
0.41593	1.20462
0.42163	1.89539
0.40476	1.33745
0.41581	1.34663
0.41075	1.07165
0.40159	0.31002
0.40387	3.19935
0.41974	0.6511
0.41244	0.48015
0.43851	0.41603
0.40743	1.82113
0.42034	0.79252
0.42733	0.36715
0.40789	1.15156
0.42371	0.46618
0.41624	0.8568
0.42954	0.54648
0.42516	0.43134
0.42371	1.05967
0.42541	0.79989
0.40115	0.60638
0.43373	0.59318
0.41827	0.99504
0.41047	1.23023
0.43223	0.54417
0.42471	0.36797
0.43421	0.52301
0.38474	1.29607
0.42154	0.56426
0.40088	0.94004
0.38768	2.07934
0.41111	0.65513
0.42966	0.33597
0.43853	0.23656
0.44524	0.33051
0.42593	0.55015
0.43397	0.48002
0.42479	0.4284
0.40616	0.66381
0.42279	0.33454
0.41662	1.34747
0.41572	0.63791
0.41675	0.98793
0.44329	0.29227
0.40132	0.32657
0.41716	1.15295
0.44662	0.27922
0.41277	0.50854
0.40616	6.21466
0.4158	2.0365
0.41873	0.22257
0.37648	0.21773
0.41509	0.85178
0.4461	0.70459
0.44009	0.46234
0.41191	2.50006
0.43031	0.98902
0.43498	0.7152
0.42129	0.97952
0.36691	0.21227
0.42377	1.20954
0.40272	1.01897
0.43041	0.33396
0.39858	1.0371
0.35918	2.92263
0.40358	2.43547
0.42446	0.4319
0.41347	0.45625
0.42931	0.75855
0.4314	0.37924
0.42407	0.8309
0.41603	1.12547
0.4089	0.23274
0.42471	0.42422
0.37735	4.86849
0.47678	0.27875
0.40423	1.40666
0.40746	0.32779
0.40483	0.98721
0.41402	0.392
0.41215	1.5552
0.41428	0.83487
0.41002	1.33977
0.4212	0.9722
0.44379	0.29218
0.37874	0.95608
0.4798	0.93267
0.40338	1.20756
0.45075	0.29095
0.41785	0.69588
0.42394	1.06685
0.40283	0.6535
0.45652	0.23543
0.3916	0.47442
0.41057	0.90405
0.42795	1.04344
0.32144	0.62464
0.40609	0.61848
0.42229	0.71164
0.49669	0.39963
0.39591	5.49576
0.39431	0.26163
0.4207	0.88716
0.41863	0.93041
0.40613	2.06654
0.45085	0.23426
0.43021	0.82625
0.41963	2.09895
0.46144	0.23867
0.43136	1.55268
0.33205	1.44181
0.42159	0.76252
0.41269	1.263
0.40155	0.53686
0.41849	0.55695
0.41907	0.41563
0.42472	0.93798
0.41297	1.12986
0.43326	0.51789
0.43019	1.31108
0.40845	2.02746
0.41183	0.52297
0.41753	2.02454
0.41564	0.80455
0.39723	0.41512
0.41834	3.11578
0.43069	0.4497
0.42202	1.31168
0.41776	0.7678
0.43182	0.22813
0.38688	0.66774
0.46731	0.20986
0.41385	0.77601
0.39862	1.16788
0.43655	0.45604
0.40955	0.85793
0.40186	0.81526
0.44207	0.34216
0.43206	0.35481
0.42712	0.87392
0.43629	0.23182
0.41217	0.39091
0.4158	0.42014
0.42426	0.63135
0.40982	1.73918
0.45435	0.43269
0.40423	5.02774
0.4054	1.91886
0.43647	0.37693
0.41356	1.31125
0.41627	2.23057
0.40888	0.76818
0.42953	1.97918
0.42343	0.30012
0.43341	0.55152
0.39367	1.02918
0.44588	0.2559
0.40241	4.7957
0.39119	0.39842
0.41624	1.34794
0.43599	0.5235
0.38383	0.88635
0.41442	1.58588
0.42609	0.22137
0.40654	1.67102
0.40982	0.83218
0.34939	0.26334
0.40767	0.46862
0.42651	0.74406
0.41755	1.55008
0.39225	0.2951
0.41551	0.64597
0.41594	1.66822
0.4238	1.79104
0.41438	1.02271
0.2825	1.7896
0.37623	1.82864
0.41764	2.85518
0.41789	0.35573
0.43902	0.50434
0.39792	1.60333
0.45174	0.2055
0.41445	0.8916
0.42244	1.29063
0.42054	1.12587
0.45147	0.31512
0.40959	0.80619
0.43116	1.38667
0.42373	0.91949
0.40745	2.13976
0.42983	0.99662
0.41419	1.0847
0.40464	2.05421
0.38578	0.95999
0.44108	0.59642
0.42321	1.02786
0.39614	0.87218
0.44094	0.34989
0.37806	2.19462
0.40323	1.28811
0.41925	0.86855
0.42433	0.55561
0.40967	2.06954
0.41303	1.39872
0.42218	0.67585
0.40307	0.51264
0.38824	0.65857
0.40984	0.25104
0.47388	0.20842
0.41499	2.35175
0.42909	0.31442
0.34324	0.24347
0.40899	0.43426
0.44037	0.32406
0.41959	1.02632
0.45621	0.48818
0.43917	0.35453
0.42349	0.53418
0.40793	1.59166
0.42904	1.17997
0.43609	1.08818
0.4093	1.10041
0.45175	0.25845
0.43802	0.36039
0.36733	1.54672
0.44849	0.2098
0.43365	0.632
0.40603	1.43245
0.4189	0.66419
0.41529	0.54564
0.33087	0.85637
0.41603	1.36773
0.40542	0.90448
0.41861	1.43821
0.43157	0.23666
0.3626	1.45592
0.40971	1.0179
0.41079	2.19972
0.45001	0.25435
0.42106	1.28079
0.39778	0.79985
0.40345	1.60624
0.40986	0.79993
0.40806	0.55556
0.4302	0.6785
0.4107	1.33008
0.39531	1.71251
0.40974	2.30195
0.37276	2.62689
0.42006	0.53918
0.44682	0.30208
0.38738	5.38289
0.44006	0.42239
0.58251	0.27122
0.42238	0.89902
0.40382	0.29192
0.46316	0.32428
0.43054	0.62137
0.43976	0.24865
0.42866	0.84461
0.41803	1.29775
0.4182	0.24822
0.39845	0.45559
0.42507	0.31513
0.37761	0.23915
0.41638	0.7273
0.42905	0.4031
0.38968	7.65028
0.42872	0.2114
0.40003	1.8521
0.39599	0.70747
0.41408	1.41535
0.41771	1.56653
0.43626	0.38955
0.40448	0.63596
0.44926	0.30911
0.42152	0.26756
0.42806	1.19009
0.40662	0.90964
0.41379	1.42084
0.42316	0.49882
0.43501	0.30781
0.40133	0.27661
0.41246	3.72112
0.45108	0.21863
0.41305	1.10672
0.40874	1.85897
0.42387	0.39269
0.42373	0.51197
0.39475	0.2788
0.40338	3.44969
0.43525	0.42374
0.42998	0.31149
0.41792	0.91164
0.41301	1.09278
0.43624	0.20083
0.44389	0.27823
0.4601	0.23766
0.40041	2.67046
0.40482	1.20032
0.40476	1.49763
0.43008	0.38708
0.39015	0.59358
0.42023	0.44796
0.40697	1.22764
0.4241	1.28554
0.43074	0.40316
0.42261	0.25844
0.39485	1.28859
0.40447	2.08707
0.44832	0.59215
0.42977	0.41574
0.4166	3.12438
0.41808	0.68164
0.43363	0.39051
0.42004	1.16481
0.41511	0.5189
0.40763	0.53537
0.39648	0.26318
0.42688	1.31979
0.41378	1.46291
0.41806	1.1514
0.40779	1.65644
0.43582	0.26374
0.41325	0.75249
0.41385	3.75279
0.47599	0.2313
0.42953	0.60128
0.43471	0.27134
0.36786	2.01942
0.41258	1.18412
0.40627	0.68699
0.40798	5.63026
0.4303	0.59039
0.44518	0.22023
0.42252	0.4027
0.41886	1.9074
0.41209	0.44578
0.42878	1.51668
0.41487	1.09512
0.40377	1.86412
0.40318	1.40122
0.4613	0.2474
0.4114	3.21436
0.40834	0.26405
0.41846	1.78274
0.4279	0.70156
0.45144	0.23551
0.42378	0.59941
0.42029	0.21373
0.41112	1.83479
0.4072	1.0635
0.41388	0.34522
0.42413	0.43511
0.41534	0.67109
0.41491	1.24055
0.4132	1.53809
0.41052	0.73184
0.4271	1.80514
0.39721	0.42744
0.40692	0.74271
0.40457	0.73439
0.41135	2.17549
0.43169	0.73446
0.44288	0.42773
0.3705	2.53866
0.41151	1.03443
0.40915	2.47137
0.43111	0.74981
0.4248	0.45672
0.40593	1.116
0.41586	0.63608
0.40895	0.63547
0.41308	1.59139
0.42111	0.79251
0.40983	0.35543
0.40279	0.50312
0.43331	0.81888
0.43896	0.27694
0.41337	0.59978
0.40566	1.6291
0.39557	0.69957
0.4113	0.66178
0.43336	0.35236
0.41423	0.70821
0.47314	0.2176
0.40922	0.47619
0.40426	0.90661
0.35882	0.31959
0.41607	1.68806
0.47154	0.22967
0.43792	0.25958
0.43626	0.61429
0.4259	1.3276
0.40896	0.67256
0.4375	0.68443
0.41917	1.21943
0.43468	0.23063
0.41178	1.44667
0.46886	0.24303
0.40871	1.71318
0.39894	0.70712
0.40712	2.41323
0.4045	1.10374
0.41477	0.56568
0.41266	0.75625
0.41506	0.67852
0.41403	0.33256
0.422	0.52803
0.41655	0.51738
0.43228	0.36799
0.39939	1.00297
0.48915	1.15195
0.42201	0.63734
0.41132	0.93464
0.40329	4.0226
0.41092	1.10529
0.42373	0.64421
0.42506	0.47049
0.41202	0.22704
0.41295	1.41891
0.40514	0.983
0.41907	0.97219
0.41629	0.75662
0.41545	2.40399
0.42518	0.63558
0.40359	2.05159
0.40475	2.85564
0.39962	1.05153
0.40904	0.61778
0.37888	1.72367
0.42869	0.56335
0.40814	0.82217
0.48161	0.21147
0.41991	1.71975
0.41162	0.88702
0.40207	0.81746
0.40171	0.66622
0.41405	1.16077
0.41603	1.94492
0.40583	0.47905
0.37839	2.68028
0.41042	0.56832
0.40713	1.73491
0.4097	1.93694
0.36383	20.5193
0.461	0.37529
0.44296	0.23556
0.42507	0.57132
0.39639	1.21632
0.39121	0.20242
0.40112	0.68505
0.40112	4.46123
0.44005	0.88519
0.41356	2.06341
0.43063	0.5167
0.41727	0.45267
0.39896	0.54647
0.40491	0.58681
0.40367	0.80886
0.41389	0.42212
0.42093	1.20718
0.41167	0.27268
0.44389	0.2182
0.41252	1.21224
0.41963	0.54473
0.41181	2.78375
0.44025	0.35677
0.45385	0.26666
0.36432	0.39573
0.41762	1.43146
0.44597	0.2466
0.4227	0.58301
0.40817	2.07979
0.43519	0.45067
0.42353	0.40297
0.40911	0.53905
0.41884	0.97656
0.41402	1.47244
0.38688	6.16319
0.38682	2.56717
0.40899	4.40772
0.41258	0.35376
0.41065	0.65576
0.40597	1.41095
0.39986	2.10931
0.42423	0.29393
0.40435	0.46341
0.41467	1.69109
0.37466	0.28392
0.41391	1.40322
0.40204	0.69808
0.45938	0.41167
0.40318	2.93936
0.4193	0.53771
0.43239	0.42863
0.45959	0.28528
0.41112	0.64629
0.43531	0.66414
0.35471	1.96311
0.45033	0.24689
0.41594	1.02396
0.41194	1.32698
0.42309	0.56449
0.41098	0.34121
0.42001	0.26329
0.4315	0.37426
0.39633	0.88583
0.42825	0.43885
0.43394	0.27948
0.41512	1.81546
0.40267	1.2907
0.4161	0.52122
0.43546	0.74488
0.40027	2.26674
0.42391	0.28989
0.41126	1.5712
0.42212	0.69855
0.42829	1.08005
0.4245	0.64815
0.4181	2.01158
0.42833	0.36028
0.42988	0.49146
0.43849	0.63474
0.41813	0.3432
0.45457	0.3391
0.42698	0.37287
0.42993	0.29622
0.4157	2.80439
0.39563	0.93088
0.41793	0.4883
0.42979	0.32562
0.42988	0.207
0.39115	0.34241
0.48854	0.27051
0.4401	0.32319
0.41321	0.39478
0.41364	0.71408
0.41008	3.03031
0.40995	0.36439
0.41247	0.57035
0.43876	1.30352
0.43285	0.31567
0.43617	0.29603
0.40986	1.42916
0.41217	1.11991
0.42155	0.78774
0.40335	1.32092
0.40713	1.69141
0.42209	0.74654
0.41934	1.54159
0.41137	1.15118
0.4118	0.62796
0.41001	0.91569
0.42643	1.13239
0.41569	0.41887
0.40661	1.8439
0.42544	1.1792
0.45633	0.25855
0.4172	0.66191
0.41183	1.33199
0.41707	1.22777
0.41796	0.79399
0.42853	0.25823
0.44504	0.25797
0.41013	2.07439
0.45695	0.49928
0.42419	1.12263
0.40452	1.85732
0.38726	3.90819
0.39727	0.77175
0.6697	0.22336
0.4197	1.40922
0.42886	0.28221
0.54924	0.39149
0.40714	0.38746
0.42302	1.22454
0.40865	0.44522
0.42128	1.33152
0.44161	0.24653
0.4212	0.65896
0.41054	0.47036
0.45615	0.32319
0.43626	0.51593
0.41004	0.61213
0.40075	0.52155
0.42098	0.58351
0.27535	18.8812
0.42294	0.87386
0.40148	0.8329
0.4255	0.85588
0.43147	0.89778
0.44971	0.26645
0.41573	1.21448
0.43084	0.42716
0.42202	2.30661
0.4133	2.40599
0.41622	0.94338
0.41975	0.85351
0.41051	1.404
0.40894	1.31156
0.47584	0.29978
0.40516	0.36452
0.43122	0.39413
0.46906	0.20254
0.42142	0.83221
0.41723	0.46084
0.41086	0.61859
0.40895	0.67069
0.42146	0.6547
0.49173	0.24006
0.44608	0.5037
0.40925	0.90684
0.40637	0.39706
0.42738	0.51474
0.41843	0.98035
0.41547	1.53222
0.43192	0.43583
0.41614	1.16285
0.40504	0.38853
0.41079	1.65137
0.43854	0.34618
0.43873	0.3109
0.41891	1.08742
0.41024	0.44784
0.41481	0.98168
0.42081	0.25382
0.41333	1.19028
0.39998	0.24726
0.42014	0.45039
0.37685	1.00817
0.40841	0.75043
0.39949	1.56632
0.42096	1.34348
0.35391	4.48333
0.41771	1.14502
0.41375	1.3587
0.41289	0.29123
0.4419	0.28299
0.43605	0.61834
0.41136	0.48646
0.44071	0.45473
0.41283	1.31104
0.40922	0.45174
0.40256	0.70383
0.42833	0.69628
0.43009	2.11275
0.43114	0.2624
0.41119	1.04692
0.40853	1.68794
0.41989	1.92699
0.41423	0.46075
0.40984	1.78452
0.44878	0.43912
0.40289	3.16401
0.38077	0.45392
0.40764	1.0519
0.45181	0.35983
0.42937	0.55268
0.44526	0.46294
0.4062	0.76533
0.41707	0.75725
0.42649	0.59652
0.41431	0.3378
0.41817	1.20961
0.4171	1.03142
0.40562	2.21523
0.47501	0.20335
0.40095	0.956
0.42576	0.57425
0.41716	1.72036
0.39715	0.39852
0.51366	0.2558
0.43177	1.08502
0.44297	0.39576
0.42654	1.17069
0.40245	0.44687
0.32401	3.16085
0.41286	1.48137
0.39802	0.62705
0.452	0.35304
0.40899	2.5603
0.42729	1.41946
0.43418	0.48768
0.45104	0.27636
0.42071	0.78537
0.41203	1.40205
0.42618	0.8497
0.44601	0.26233
0.4306	0.78261
0.65719	0.27852
0.43634	0.3285
0.40323	0.70584
0.42661	0.54361
0.48362	0.8709
0.43419	0.75635
0.42195	0.78675
0.40041	2.35678
0.39851	7.74056
0.43115	0.5109
0.43776	0.22211
0.4407	0.3329
0.41084	0.73977
0.43475	1.75562
0.42088	0.77906
0.43229	0.89908
0.45236	0.22303
0.4442	0.22277
0.37127	0.3924
0.39784	0.76439
0.42145	0.66356
0.44396	0.3279
0.40492	2.0995
0.42407	0.25535
0.43179	0.41071
0.39953	0.93447
0.4234	1.71989
0.42591	0.56133
0.41861	0.99849
0.40431	1.51842
0.44322	0.35562
0.43443	0.27082
0.44343	0.22529
0.42329	0.40984
0.43279	0.3509
0.42579	1.08785
0.40836	0.42094
0.38399	0.97196
0.41404	0.34497
0.39279	0.52893
0.40826	0.8359
0.43144	0.56387
0.39783	0.38769
0.3966	0.36707
0.40996	1.41395
0.3833	0.27171
0.37985	1.20384
0.40845	1.01762
0.41962	1.35878
0.4092	2.31796
0.3954	0.84484
0.41097	0.51182
0.44291	0.55998
0.44396	0.47524
0.41242	2.11487
0.42389	1.76892
0.44712	0.3634
0.42312	0.60227
0.40967	2.25189
0.17133	0.65527
[truncated: 32,169 more rows]

## Sheet: Fig. 5e
H31-10R2(Me2s) Scatter			BlockDepth histogram			Gaussian-fitting for BlockDepth			Restime histogram			LogNormal-fitting for Restime
BlockDepth	Restime (ms)		BlockDepth	Relative counts		BlockDepth	Relative counts		Restime (ms)	Relative counts		Restime (ms)	Relative counts
0.43877	1.04048		0.3015	2.27273E-4		0.3015	0.00189		0.05	0		0.05	0.00263
0.40014	0.36065		0.3045	3.71901E-4		0.3018	0.00189		0.15	0		0.06992	0.00697
0.3587	1.5087		0.3075	4.95868E-4		0.30239	0.00189		0.25	0.10087		0.08984	0.0132
0.40881	0.31627		0.3105	4.75207E-4		0.30269	0.00189		0.35	0.08918		0.10976	0.0206
0.40354	1.78208		0.3135	5.3719E-4		0.30299	0.00189		0.45	0.07889		0.12968	0.0285
0.40966	0.65922		0.3165	6.19835E-4		0.30328	0.00189		0.55	0.0737		0.1496	0.0364
0.39352	0.508		0.3195	5.16529E-4		0.30358	0.00189		0.65	0.06402		0.15	0.03655
0.41734	1.15855		0.3225	7.85124E-4		0.30388	0.00189		0.75	0.05846		0.16952	0.04393
0.39686	3.89822		0.3255	5.78512E-4		0.30418	0.00189		0.85	0.04954		0.18944	0.05089
0.46106	0.29122		0.3285	7.43802E-4		0.30447	0.00189		0.95	0.04653		0.20936	0.05714
0.40667	1.62903		0.3315	9.09091E-4		0.3045	0.00189		1.05	0.04025		0.22928	0.06263
0.41133	1.43718		0.3345	0.00138		0.30477	0.00189		1.15	0.0372		0.2492	0.06737
0.41356	1.89292		0.3375	0.00118		0.30507	0.00189		1.25	0.03478		0.25	0.06754
0.4254	0.30481		0.3405	0.00157		0.30536	0.00189		1.35	0.0299		0.26912	0.07136
0.4232	0.48987		0.3435	0.00209		0.30566	0.00189		1.45	0.02746		0.28904	0.07467
0.40787	0.81481		0.3465	0.0026		0.30596	0.00189		1.55	0.02475		0.30896	0.07734
0.38208	0.40425		0.3495	0.00364		0.30626	0.00189		1.65	0.0217		0.32888	0.07943
0.40527	1.47355		0.3525	0.005		0.30655	0.00189		1.75	0.02096		0.3488	0.08099
0.41315	1.71207		0.3555	0.00589		0.30685	0.00189		1.85	0.01848		0.35	0.08107
0.41533	0.47111		0.3585	0.00725		0.30715	0.00189		1.95	0.01688		0.36872	0.08209
0.41259	0.63345		0.3615	0.00798		0.30745	0.00189		2.05	0.01423		0.38864	0.08277
0.40282	0.34742		0.3645	0.00903		0.3075	0.00189		2.15	0.01329		0.40856	0.08309
0.38903	1.59091		0.3675	0.00857		0.30774	0.00189		2.25	0.0122		0.42848	0.0831
0.3966	1.0768		0.3705	0.00833		0.30804	0.00189		2.35	0.01107		0.4484	0.08283
0.43011	0.37778		0.3735	0.00905		0.30834	0.00189		2.45	0.01021		0.45	0.0828
0.43599	0.43887		0.3765	0.00899		0.30864	0.00189		2.55	0.00894		0.46832	0.08233
0.43198	0.26224		0.3795	0.008		0.30893	0.00189		2.65	0.00804		0.48824	0.08162
0.39921	0.43699		0.3825	0.00876		0.30923	0.00189		2.75	0.00777		0.50816	0.08075
0.37881	0.67585		0.3855	0.01138		0.30953	0.00189		2.85	0.00658		0.52808	0.07972
0.47688	0.23182		0.3885	0.01777		0.30982	0.00189		2.95	0.00619		0.548	0.07858
0.40704	1.10153		0.3915	0.02612		0.31012	0.00189		3.05	0.0056		0.55	0.07846
0.42649	0.46361		0.3945	0.03919		0.31042	0.00189		3.15	0.00474		0.56792	0.07733
0.40169	3.7877		0.3975	0.05529		0.3105	0.00189		3.25	0.00429		0.58784	0.07601
0.40234	1.15331		0.4005	0.07308		0.31072	0.00189		3.35	0.00412		0.60776	0.07462
0.4117	0.96802		0.4035	0.08223		0.31101	0.00189		3.45	0.00386		0.62768	0.07317
0.42162	1.61244		0.4065	0.08822		0.31131	0.00189		3.55	0.00379		0.6476	0.07169
0.42582	0.31595		0.4095	0.08552		0.31161	0.00189		3.65	0.00338		0.65	0.07151
0.39592	0.59929		0.4125	0.07442		0.31191	0.00189		3.75	0.00295		0.66752	0.07018
0.40677	0.47101		0.4155	0.06386		0.3122	0.00189		3.85	0.00301		0.68744	0.06865
0.39875	0.27877		0.4185	0.05262		0.3125	0.00189		3.95	0.00207		0.70736	0.0671
0.42622	0.47038		0.4215	0.04289		0.3128	0.00189		4.05	0.00232		0.72728	0.06556
0.40462	0.67874		0.4245	0.03415		0.31309	0.00189		4.15	0.00191		0.7472	0.06402
0.401	2.71171		0.4275	0.02694		0.31339	0.00189		4.25	0.00197		0.75	0.0638
0.40549	0.80387		0.4305	0.02192		0.3135	0.00189		4.35	0.00164		0.76712	0.06248
0.43646	0.24538		0.4335	0.01764		0.31369	0.00189		4.45	0.00183		0.78704	0.06096
0.41365	1.77556		0.4365	0.01434		0.31399	0.00189		4.55	0.00131		0.80696	0.05945
0.41496	2.24246		0.4395	0.01227		0.31428	0.00189		4.65	0.0017		0.82688	0.05796
0.41579	1.2961		0.4425	0.00979		0.31458	0.00189		4.75	0.00117		0.8468	0.05649
0.41827	0.52066		0.4455	0.00864		0.31488	0.00189		4.85	0.00103		0.85	0.05625
0.42595	0.52639		0.4485	0.00651		0.31518	0.00189		4.95	9.4328E-4		0.86672	0.05504
0.40413	1.34603		0.4515	0.00618		0.31547	0.00189		5.05	7.79231E-4		0.88664	0.05362
0.39532	1.67031		0.4545	0.00469		0.31577	0.00189		5.15	7.38219E-4		0.90656	0.05223
0.43538	0.68034		0.4575	0.00409		0.31607	0.00189		5.25	9.63786E-4		0.92648	0.05086
0.40863	1.73495		0.4605	0.00293		0.31636	0.00189		5.35	5.12652E-4		0.9464	0.04952
0.38306	1.77438		0.4635	0.00246		0.3165	0.00189		5.45	7.38219E-4		0.95	0.04928
0.41824	0.90181		0.4665	0.00151		0.31666	0.00189		5.55	6.15183E-4		0.96632	0.04821
0.40795	2.2275		0.4695	0.00157		0.31696	0.00189		5.65	6.76701E-4		0.98624	0.04693
0.43466	0.30118		0.4725	0.00114		0.31726	0.00189		5.75	6.56195E-4		1.00616	0.04568
0.46291	0.23219		0.4755	0.00126		0.31755	0.00189		5.85	4.7164E-4		1.02608	0.04446
0.43205	0.3622		0.4785	7.43802E-4		0.31785	0.00189		5.95	5.53664E-4		1.046	0.04327
0.39672	0.77684		0.4815	7.02479E-4		0.31815	0.00189		6.05	4.92146E-4		1.05	0.04304
0.39813	2.52013		0.4845	3.92562E-4		0.31845	0.00189		6.15	4.7164E-4		1.06592	0.04211
0.41717	0.32708		0.4875	5.3719E-4		0.31874	0.00189		6.25	3.07591E-4		1.08584	0.04099
0.4172	1.36487		0.4905	1.8595E-4		0.31904	0.00189		6.35	3.6911E-4		1.10576	0.03988
0.40807	0.89401		0.4935	1.65289E-4		0.31934	0.00189		6.45	3.48604E-4		1.12568	0.03881
0.42281	0.83837		0.4965	2.47934E-4		0.3195	0.00189		6.55	2.05061E-4		1.1456	0.03777
0.39948	1.03452		0.4995	6.19835E-5		0.31964	0.00189		6.65	2.05061E-4		1.15	0.03754
0.42021	0.40817		0.5025	0		0.31993	0.00189		6.75	3.28097E-4		1.16552	0.03676
0.42906	0.60688		0.5055	6.19835E-5		0.32023	0.00189		6.85	1.84555E-4		1.18544	0.03577
0.42664	0.35053		0.5085	8.26446E-5		0.32053	0.00189		6.95	2.46073E-4		1.20536	0.03481
0.42562	0.34449		0.5115	4.13223E-5		0.32082	0.00189		7.05	1.84555E-4		1.22528	0.03388
0.40657	1.06496		0.5145	2.06612E-5		0.32112	0.00189		7.15	2.05061E-4		1.2452	0.03297
0.43125	0.21156		0.5175	1.03306E-4		0.32142	0.00189		7.25	2.87085E-4		1.25	0.03276
0.40047	0.79673		0.5205	4.13223E-5		0.32172	0.00189		7.35	2.05061E-4		1.26512	0.03209
0.40278	0.77032		0.5235	4.13223E-5		0.32201	0.00189		7.45	1.43543E-4		1.28504	0.03124
0.43602	0.32198		0.5265	2.06612E-5		0.32231	0.00189		7.55	1.23037E-4		1.30495	0.03041
0.39516	1.40936		0.5295	4.13223E-5		0.3225	0.00189		7.65	1.23037E-4		1.32487	0.0296
0.4024	0.83524		0.5325	2.06612E-5		0.32261	0.00189		7.75	1.64049E-4		1.34479	0.02881
0.40259	0.30032		0.5355	4.13223E-5		0.32291	0.00189		7.85	1.43543E-4		1.35	0.02861
0.41161	0.35588		0.5385	0		0.3232	0.00189		7.95	2.05061E-4		1.36471	0.02805
0.40922	0.41092		0.5415	2.06612E-5		0.3235	0.00189		8.05	1.43543E-4		1.38463	0.02731
0.39586	2.95571		0.5445	2.06612E-5		0.3238	0.00189		8.15	8.20244E-5		1.40455	0.02659
0.40622	0.75489		0.5475	2.06612E-5		0.32409	0.00189		8.25	8.20244E-5		1.42447	0.02589
0.4272	0.39837		0.5505	2.06612E-5		0.32439	0.00189		8.35	1.0253E-4		1.44439	0.02522
0.39567	2.76722		0.5535	0		0.32469	0.00189		8.45	8.20244E-5		1.45	0.02503
0.41038	0.65329		0.5565	0		0.32499	0.00189		8.55	6.15183E-5		1.46431	0.02456
0.4059	0.7242		0.5595	0		0.32528	0.00189		8.65	1.43543E-4		1.48423	0.02392
0.4174	1.17124		0.5625	0		0.3255	0.00189		8.75	4.10122E-5		1.50415	0.0233
0.40834	1.51763		0.5655	4.13223E-5		0.32558	0.00189		8.85	6.15183E-5		1.52407	0.0227
0.41925	0.71254		0.5685	0		0.32588	0.00189		8.95	6.15183E-5		1.54399	0.02211
0.40167	1.29228		0.5715	6.19835E-5		0.32618	0.00189		9.05	6.15183E-5		1.55	0.02194
0.43479	0.46338		0.5745	0		0.32647	0.00189		9.15	4.10122E-5		1.56391	0.02154
0.40039	1.36855		0.5775	4.13223E-5		0.32677	0.00189		9.25	0		1.58383	0.02099
0.41324	4.89596		0.5805	0		0.32707	0.00189		9.35	2.05061E-5		1.60375	0.02045
0.40513	2.36084		0.5835	0		0.32736	0.00189		9.45	2.05061E-5		1.62367	0.01993
0.44621	0.25946		0.5865	0		0.32766	0.00189		9.55	2.05061E-5		1.64359	0.01943
0.39203	0.95697		0.5895	0		0.32796	0.00189		9.65	8.20244E-5		1.65	0.01927
0.40172	2.01571		0.5925	2.06612E-5		0.32826	0.00189		9.75	4.10122E-5		1.66351	0.01894
0.41584	0.91496		0.5955	0		0.3285	0.00189		9.85	6.15183E-5		1.68343	0.01846
0.40591	1.5461		0.5985	0		0.32855	0.00189		9.95	8.20244E-5		1.70335	0.018
0.43111	0.57556					0.32885	0.00189		10.05	4.10122E-5		1.72327	0.01755
0.3975	0.77531					0.32915	0.00189		10.15	4.10122E-5		1.74319	0.01711
0.4184	0.39081					0.32945	0.00189		10.25	6.15183E-5		1.75	0.01696
0.39294	1.628					0.32974	0.00189		10.35	4.10122E-5		1.76311	0.01669
0.39745	0.86852					0.33004	0.00189		10.45	0		1.78303	0.01627
0.41939	0.90233					0.33034	0.00189		10.55	2.05061E-5		1.80295	0.01587
0.39713	4.02114					0.33064	0.00189		10.65	2.05061E-5		1.82287	0.01548
0.40396	5.04496					0.33093	0.00189		10.75	8.20244E-5		1.84279	0.0151
0.42195	0.59626					0.33123	0.00189		10.85	8.20244E-5		1.85	0.01497
0.40029	3.22344					0.3315	0.00189		10.95	0		1.86271	0.01474
0.39499	1.24494					0.33153	0.00189		11.05	0		1.88263	0.01438
0.40135	0.56299					0.33182	0.00189		11.15	4.10122E-5		1.90255	0.01403
0.42461	0.96452					0.33212	0.00189		11.25	2.05061E-5		1.92247	0.01369
0.39749	2.87259					0.33242	0.00189		11.35	4.10122E-5		1.94239	0.01336
0.38701	0.52632					0.33272	0.00189		11.45	0		1.95	0.01324
0.42395	2.59016					0.33301	0.00189		11.55	2.05061E-5		1.96231	0.01305
0.39421	2.40752					0.33331	0.00189		11.65	2.05061E-5		1.98223	0.01274
0.43162	0.75046					0.33361	0.00189		11.75	0		2.00215	0.01243
0.41452	0.51262					0.33391	0.00189		11.85	0		2.02207	0.01214
0.40759	18.9863					0.3342	0.00189		11.95	0		2.04199	0.01185
0.42922	0.60671					0.3345	0.00189		12.05	4.10122E-5		2.05	0.01174
0.41292	1.3364					0.3348	0.00189		12.15	4.10122E-5		2.06191	0.01158
0.40085	3.57853					0.33509	0.00189		12.25	2.05061E-5		2.08183	0.01131
0.40949	0.94547					0.33539	0.00189		12.35	0		2.10175	0.01104
0.39876	2.52064					0.33569	0.00189		12.45	0		2.12167	0.01079
0.40527	0.62371					0.33599	0.00189		12.55	0		2.14159	0.01054
0.34403	0.27024					0.33628	0.00189		12.65	4.10122E-5		2.15	0.01044
0.40306	3.58095					0.33658	0.00189		12.75	4.10122E-5		2.16151	0.0103
0.38557	0.85561					0.33688	0.00189		12.85	6.15183E-5		2.18143	0.01006
0.43423	0.4566					0.33718	0.00189		12.95	0		2.20135	0.00983
0.397	1.55668					0.33747	0.00189		13.05	0		2.22127	0.00961
0.40788	0.70313					0.3375	0.00189		13.15	0		2.24119	0.00939
0.42884	0.46483					0.33777	0.00189		13.25	4.10122E-5		2.25	0.0093
0.4033	0.57427					0.33807	0.00189		13.35	0		2.26111	0.00918
0.3901	0.83706					0.33836	0.00189		13.45	0		2.28103	0.00898
0.40223	0.69774					0.33866	0.00189		13.55	0		2.30095	0.00878
0.41485	1.18447					0.33896	0.00189		13.65	0		2.32087	0.00858
0.4223	0.2899					0.33926	0.00189		13.75	2.05061E-5		2.34079	0.00839
0.39	2.09269					0.33955	0.00189		13.85	0		2.35	0.00831
0.39852	1.91751					0.33985	0.00189		13.95	2.05061E-5		2.36071	0.00821
0.41623	1.15988					0.34015	0.00189		14.05	0		2.38063	0.00803
0.38671	0.60288					0.34045	0.00189		14.15	0		2.40055	0.00785
0.40718	0.81485					0.3405	0.00189		14.25	0		2.42047	0.00768
0.41369	0.73827					0.34074	0.00189		14.35	2.05061E-5		2.44039	0.00751
0.40796	2.36045					0.34104	0.00189		14.45	2.05061E-5		2.45	0.00743
0.42072	0.44651					0.34134	0.00189		14.55	2.05061E-5		2.46031	0.00735
0.39489	1.10584					0.34164	0.00189		14.65	0		2.48023	0.00719
0.39129	2.00791					0.34193	0.00189		14.75	0		2.50015	0.00704
0.40971	2.5237					0.34223	0.00189		14.85	2.05061E-5		2.52007	0.00689
0.39804	2.90712					0.34253	0.00189		14.95	0		2.53999	0.00674
0.38671	0.62462					0.34282	0.00189		15.05	0		2.55	0.00667
0.42298	0.6552					0.34312	0.00189		15.15	0		2.55991	0.0066
0.39436	3.38444					0.34342	0.00189		15.25	0		2.57983	0.00646
0.42172	0.24062					0.3435	0.00189		15.35	2.05061E-5		2.59975	0.00633
0.41626	1.17774					0.34372	0.00189		15.45	0		2.61967	0.00619
0.43066	0.25277					0.34401	0.00189		15.55	2.05061E-5		2.63959	0.00606
0.40297	0.71154					0.34431	0.00189		15.65	0		2.65	0.006
0.40615	3.13298					0.34461	0.00189		15.75	0		2.65951	0.00594
0.41493	0.90074					0.34491	0.00189		15.85	0		2.67943	0.00582
0.41537	0.41581					0.3452	0.00189		15.95	0		2.69935	0.0057
0.41553	0.28113					0.3455	0.00189		16.05	2.05061E-5		2.71927	0.00558
0.40548	0.481					0.3458	0.00189		16.15	2.05061E-5		2.73919	0.00547
0.39408	0.6803					0.34609	0.00189		16.25	0		2.75	0.00541
0.40694	0.91849					0.34639	0.00189		16.35	2.05061E-5		2.75911	0.00536
0.40997	0.74697					0.3465	0.00189		16.45	2.05061E-5		2.77903	0.00525
0.40166	1.43623					0.34669	0.00189		16.55	0		2.79895	0.00514
0.39395	2.33923					0.34699	0.00189		16.65	0		2.81887	0.00504
0.40627	1.13737					0.34728	0.00189		16.75	0		2.83879	0.00494
0.40491	1.69833					0.34758	0.00189		16.85	0		2.85	0.00488
0.40297	1.32765					0.34788	0.00189		16.95	0		2.85871	0.00484
0.39371	1.5164					0.34818	0.00189		17.05	0		2.87863	0.00474
0.40695	1.0032					0.34847	0.00189		17.15	2.05061E-5		2.89855	0.00465
0.39629	0.59235					0.34877	0.00189		17.25	2.05061E-5		2.91847	0.00456
0.4226	0.54428					0.34907	0.00189		17.35	2.05061E-5		2.93839	0.00447
0.42077	1.16409					0.34936	0.00189		17.45	4.10122E-5		2.95	0.00442
0.4109	1.22692					0.3495	0.00189		17.55	0		2.95831	0.00438
0.4109	2.4012					0.34966	0.00189		17.65	4.10122E-5		2.97823	0.0043
0.43318	0.75239					0.34996	0.00189		17.75	0		2.99815	0.00422
0.40883	0.99983					0.35026	0.00189		17.85	0		3.01807	0.00414
0.42299	0.39134					0.35055	0.00189		17.95	0		3.03799	0.00406
0.41926	0.49223					0.35085	0.00189		18.05	0		3.05	0.00401
0.41606	0.46144					0.35115	0.00189		18.15	0		3.05791	0.00398
0.40358	0.70298					0.35145	0.00189		18.25	2.05061E-5		3.07783	0.0039
0.40527	2.18723					0.35174	0.00189		18.35	0		3.09775	0.00383
0.40903	1.179					0.35204	0.00189		18.45	0		3.11767	0.00376
0.40075	1.53043					0.35234	0.00189		18.55	0		3.13759	0.00369
0.40066	5.22068					0.3525	0.00189		18.65	2.05061E-5		3.15	0.00364
0.42112	0.68399					0.35264	0.00189		18.75	0		3.15751	0.00362
0.41769	0.24269					0.35293	0.00189		18.85	2.05061E-5		3.17743	0.00355
0.41223	0.53397					0.35323	0.00189		18.95	4.10122E-5		3.19735	0.00349
0.41732	1.53636					0.35353	0.00189		19.05	6.15183E-5		3.21727	0.00342
0.4228	0.78076					0.35382	0.00189		19.15	0		3.23719	0.00336
0.40324	0.64204					0.35412	0.00189		19.25	0		3.25	0.00332
0.40266	2.82006					0.35442	0.00189		19.35	0		3.25711	0.0033
0.39822	0.50475					0.35472	0.00189		19.45	0		3.27703	0.00324
0.38804	0.23546					0.35501	0.00189		19.55	0		3.29695	0.00318
0.41892	1.50441					0.35531	0.00189		19.65	0		3.31687	0.00312
0.46583	0.2291					0.3555	0.0019		19.75	0		3.33679	0.00307
0.41043	1.0087					0.35561	0.0019		19.85	0		3.35	0.00303
0.40594	0.65058					0.35591	0.0019		19.95	0		3.35671	0.00301
0.39406	1.86763					0.3562	0.0019					3.37663	0.00296
0.40466	0.58818					0.3565	0.0019					3.39655	0.00291
0.42504	0.42929					0.3568	0.0019					3.41647	0.00285
0.42131	0.64025					0.35709	0.0019					3.43639	0.0028
0.40403	0.81742					0.35739	0.0019					3.45	0.00277
0.41523	0.47121					0.35769	0.0019					3.45631	0.00276
0.40918	0.85968					0.35799	0.0019					3.47623	0.00271
0.41571	1.16915					0.35828	0.0019					3.49615	0.00266
0.42182	0.60516					0.3585	0.0019					3.51607	0.00262
0.42611	0.61583					0.35858	0.0019					3.53599	0.00257
0.41879	0.64314					0.35888	0.00191					3.55	0.00254
0.41613	0.31395					0.35918	0.00191					3.55591	0.00253
0.41684	1.30092					0.35947	0.00191					3.57583	0.00248
0.42969	0.32912					0.35977	0.00191					3.59575	0.00244
0.41418	1.33689					0.36007	0.00191					3.61567	0.0024
0.39048	1.45052					0.36036	0.00192					3.63559	0.00236
0.3969	0.93154					0.36066	0.00192					3.65	0.00233
0.43805	0.67107					0.36096	0.00192					3.65551	0.00232
0.42065	1.20182					0.36126	0.00192					3.67543	0.00228
0.41464	0.27576					0.3615	0.00193					3.69535	0.00224
0.38598	2.55285					0.36155	0.00193					3.71527	0.00221
0.4193	0.31243					0.36185	0.00193					3.73519	0.00217
0.39588	1.36422					0.36215	0.00194					3.75	0.00215
0.41996	0.59612					0.36245	0.00194					3.75511	0.00214
0.41281	4.75679					0.36274	0.00194					3.77503	0.0021
0.40938	2.02347					0.36304	0.00195					3.79494	0.00207
0.39629	0.92099					0.36334	0.00196					3.81486	0.00203
0.40883	0.62269					0.36364	0.00196					3.83478	0.002
0.40737	1.23162					0.36393	0.00197					3.85	0.00198
0.42327	0.62572					0.36423	0.00198					3.8547	0.00197
0.40272	2.24474					0.3645	0.00198					3.87462	0.00194
0.41044	0.5247					0.36453	0.00198					3.89454	0.00191
0.40072	0.32141					0.36482	0.00199					3.91446	0.00188
0.42177	0.53606					0.36512	0.002					3.93438	0.00185
0.4217	0.43363					0.36542	0.00201					3.95	0.00183
0.38727	0.23375					0.36572	0.00203					3.9543	0.00182
0.40136	1.47844					0.36601	0.00204					3.97422	0.00179
0.41287	5.58301					0.36631	0.00205					3.99414	0.00176
0.41074	0.49774					0.36661	0.00207					4.01406	0.00174
0.42639	0.36242					0.36691	0.00208					4.03398	0.00171
0.41958	0.79846					0.3672	0.0021					4.05	0.00169
0.40499	0.6282					0.3675	0.00212					4.0539	0.00168
0.3763	1.30219					0.3678	0.00214					4.07382	0.00166
0.45094	0.22378					0.36809	0.00216					4.09374	0.00163
0.44244	0.25286					0.36839	0.00219					4.11366	0.00161
0.40126	1.15844					0.36869	0.00221					4.13358	0.00159
0.45276	0.27364					0.36899	0.00224					4.15	0.00157
0.46123	0.21357					0.36928	0.00227					4.1535	0.00156
0.43529	0.37149					0.36958	0.0023					4.17342	0.00154
0.40806	0.62908					0.36988	0.00234					4.19334	0.00152
0.43544	0.41424					0.37018	0.00237					4.21326	0.00149
0.42624	0.43656					0.37047	0.00241					4.23318	0.00147
0.40159	2.31614					0.3705	0.00242					4.25	0.00146
0.39015	2.09372					0.37077	0.00246					4.2531	0.00145
0.39993	1.62112					0.37107	0.0025					4.27302	0.00143
0.41545	0.4259					0.37136	0.00255					4.29294	0.00141
0.4002	1.99052					0.37166	0.0026					4.31286	0.00139
0.44085	0.30858					0.37196	0.00266					4.33278	0.00137
0.42419	1.02366					0.37226	0.00272					4.35	0.00135
0.39137	1.8112					0.37255	0.00279					4.3527	0.00135
0.39611	1.04004					0.37285	0.00286					4.37262	0.00133
0.41341	0.86647					0.37315	0.00293					4.39254	0.00131
0.37551	1.92056					0.37345	0.00301					4.41246	0.0013
0.42474	0.40688					0.3735	0.00302					4.43238	0.00128
0.44255	0.8091					0.37374	0.00309					4.45	0.00126
0.39584	1.25988					0.37404	0.00318					4.4523	0.00126
0.35742	1.10793					0.37434	0.00328					4.47222	0.00124
0.3927	2.9317					0.37464	0.00338					4.49214	0.00123
0.39242	1.08891					0.37493	0.00349					4.51206	0.00121
0.41317	0.48923					0.37523	0.00361					4.53198	0.00119
0.4213	1.24668					0.37553	0.00373					4.55	0.00118
0.41724	1.60047					0.37582	0.00386					4.5519	0.00118
0.4018	0.66309					0.37612	0.004					4.57182	0.00116
0.42711	0.41715					0.37642	0.00414					4.59174	0.00115
0.39399	0.92781					0.3765	0.00419					4.61166	0.00113
0.41153	1.79995					0.37672	0.0043					4.63158	0.00112
0.41626	1.86682					0.37701	0.00446					4.65	0.0011
0.40413	0.84849					0.37731	0.00464					4.6515	0.0011
0.40424	2.7544					0.37761	0.00482					4.67142	0.00109
0.40166	1.5396					0.37791	0.00502					4.69134	0.00107
0.40085	3.08791					0.3782	0.00522					4.71126	0.00106
0.39618	3.82481					0.3785	0.00544					4.73118	0.00105
0.4117	2.4321					0.3788	0.00566					4.75	0.00103
0.40929	0.66869					0.37909	0.0059					4.7511	0.00103
0.42342	0.63221					0.37939	0.00616					4.77102	0.00102
0.42049	1.02053					0.3795	0.00625					4.79094	0.00101
0.4309	0.36133					0.37969	0.00642					4.81086	9.9577E-4
0.41166	0.45676					0.37999	0.0067					4.83078	9.8349E-4
0.42651	0.37218					0.38028	0.00699					4.85	9.71853E-4
0.39844	1.02244					0.38058	0.0073					4.8507	9.71432E-4
0.43971	0.38834					0.38088	0.00762					4.87062	9.59592E-4
0.41241	0.42371					0.38118	0.00796					4.89054	9.47964E-4
0.44125	0.24877					0.38147	0.00831					4.91046	9.36544E-4
0.46233	0.23224					0.38177	0.00868					4.93038	9.25328E-4
0.43755	0.33489					0.38207	0.00907					4.95	9.14477E-4
0.42032	0.60641					0.38236	0.00948					4.9503	9.14313E-4
0.40677	0.49208					0.3825	0.00967					4.97022	9.03493E-4
0.42401	0.32799					0.38266	0.0099					4.99014	8.92865E-4
0.4261	0.60043					0.38296	0.01034					5.01006	8.82426E-4
0.39999	1.27226					0.38326	0.0108					5.02998	8.7217E-4
0.40168	1.49064					0.38355	0.01127					5.0499	8.62095E-4
0.39601	2.3801					0.38385	0.01177					5.05	8.62045E-4
0.40088	0.77625					0.38415	0.01229					5.06982	8.52197E-4
0.42212	0.8905					0.38445	0.01283					5.08974	8.42473E-4
0.42989	0.54857					0.38474	0.01338					5.10966	8.32919E-4
0.41489	0.64429					0.38504	0.01396					5.12958	8.23531E-4
0.42215	0.64396					0.38534	0.01456					5.1495	8.14307E-4
0.39991	1.79981					0.3855	0.0149					5.15	8.14077E-4
0.42955	0.35426					0.38564	0.01518					5.16942	8.05243E-4
0.41338	0.61289					0.38593	0.01583					5.18934	7.96336E-4
0.41004	0.49964					0.38623	0.01649					5.20926	7.87583E-4
0.40362	1.07291					0.38653	0.01718					5.22918	7.7898E-4
0.41201	0.77722					0.38682	0.01789					5.2491	7.70526E-4
0.41127	1.97548					0.38712	0.01862					5.25	7.70147E-4
0.41113	1.41565					0.38742	0.01938					5.26902	7.62216E-4
0.40898	1.22423					0.38772	0.02016					5.28894	7.54049E-4
0.409	0.78307					0.38801	0.02096					5.30886	7.46022E-4
0.38874	2.26008					0.38831	0.02178					5.32878	7.38131E-4
0.40062	1.30266					0.3885	0.02232					5.3487	7.30374E-4
0.41982	0.60041					0.38861	0.02263					5.35	7.29872E-4
0.41043	0.2558					0.38891	0.0235					5.36862	7.22749E-4
0.4013	1.2965					0.3892	0.02439					5.38854	7.15253E-4
0.42007	1.05185					0.3895	0.0253					5.40846	7.07883E-4
0.41678	0.76556					0.3898	0.02623					5.42838	7.00638E-4
0.39735	1.05021					0.39009	0.02719					5.4483	6.93514E-4
0.40767	2.6122					0.39039	0.02817					5.45	6.92911E-4
0.41289	0.21073					0.39069	0.02917					5.46822	6.86509E-4
0.41142	3.99148					0.39099	0.03018					5.48814	6.79622E-4
0.41414	0.86705					0.39128	0.03122					5.50806	6.7285E-4
0.42813	0.23922					0.3915	0.03199					5.52798	6.66191E-4
0.40544	3.36481					0.39158	0.03228					5.5479	6.59642E-4
0.42889	0.22313					0.39188	0.03335					5.55	6.58957E-4
0.42865	0.28259					0.39218	0.03445					5.56782	6.53201E-4
0.39496	3.36326					0.39247	0.03556					5.58774	6.46868E-4
0.39323	1.26826					0.39277	0.03669					5.60766	6.40638E-4
0.42126	0.59237					0.39307	0.03783					5.62758	6.34512E-4
0.40765	1.68933					0.39336	0.03898					5.6475	6.28486E-4
0.39398	2.28906					0.39366	0.04015					5.65	6.27736E-4
0.40338	1.5525					0.39396	0.04133					5.66742	6.22559E-4
0.40888	0.65271					0.39426	0.04253					5.68734	6.16728E-4
0.3975	1.25671					0.3945	0.04351					5.70726	6.10993E-4
0.40234	1.16114					0.39455	0.04373					5.72718	6.05351E-4
0.36831	0.77933					0.39485	0.04494					5.7471	5.99801E-4
0.41879	0.89071					0.39515	0.04616					5.75	5.99E-4
0.42105	0.58643					0.39545	0.04739					5.76702	5.94341E-4
0.40595	1.27051					0.39574	0.04862					5.78694	5.88969E-4
0.42507	0.4807					0.39604	0.04985					5.80686	5.83684E-4
0.40684	2.01605					0.39634	0.05108					5.82678	5.78484E-4
0.41422	2.14289					0.39664	0.05232					5.8467	5.73368E-4
0.40505	1.07076					0.39693	0.05355					5.85	5.72528E-4
0.4097	1.0111					0.39723	0.05478					5.86662	5.68334E-4
0.42376	0.39546					0.3975	0.0559					5.88654	5.6338E-4
0.42593	0.42781					0.39753	0.05601					5.90646	5.58505E-4
0.41091	1.49586					0.39782	0.05723					5.92638	5.53708E-4
0.40532	1.45788					0.39812	0.05845					5.9463	5.48988E-4
0.44663	0.28759					0.39842	0.05965					5.95	5.48118E-4
0.4109	1.05416					0.39872	0.06084					5.96622	5.44342E-4
0.42124	0.36794					0.39901	0.06202					5.98614	5.3977E-4
0.35519	1.32389					0.39931	0.06319					6.00606	5.3527E-4
0.43616	0.30663					0.39961	0.06433					6.02598	5.30841E-4
0.42771	0.5115					0.39991	0.06546					6.0459	5.26481E-4
0.42882	0.85662					0.4002	0.06657					6.05	5.25591E-4
0.40658	0.86406					0.4005	0.06766					6.06582	5.2219E-4
0.4026	0.52698					0.4008	0.06873					6.08574	5.17966E-4
0.40478	2.81917					0.40109	0.06977					6.10566	5.13809E-4
0.41083	0.28474					0.40139	0.07078					6.12558	5.09716E-4
0.39593	0.5819					0.40169	0.07177					6.1455	5.05687E-4
0.41755	0.50022					0.40199	0.07272					6.15	5.04784E-4
0.41334	1.15166					0.40228	0.07365					6.16542	5.0172E-4
0.42569	0.4547					0.40258	0.07453					6.18534	4.97815E-4
0.4149	0.2327					0.40288	0.07539					6.20526	4.9397E-4
0.44453	0.46718					0.40318	0.07621					6.22518	4.90185E-4
0.40984	1.42999					0.40347	0.07699					6.2451	4.86458E-4
0.42272	0.55471					0.4035	0.07706					6.25	4.85549E-4
0.40601	0.43283					0.40377	0.07773					6.26502	4.82788E-4
0.40657	1.48877					0.40407	0.07843					6.28493	4.79175E-4
0.44466	0.50696					0.40436	0.07909					6.30485	4.75617E-4
0.41628	0.99261					0.40466	0.07971					6.32477	4.72113E-4
0.38946	2.57675					0.40496	0.08028					6.34469	4.68663E-4
0.40032	2.08428					0.40526	0.08081					6.35	4.67753E-4
0.41625	1.42026					0.40555	0.08129					6.36461	4.65265E-4
0.41229	0.85069					0.40585	0.08172					6.38453	4.61919E-4
0.41205	3.24344					0.40615	0.08211					6.40445	4.58624E-4
0.40935	0.54655					0.40645	0.08245					6.42437	4.55378E-4
0.36438	0.70036					0.4065	0.08251					6.44429	4.52182E-4
0.41176	0.38222					0.40674	0.08274					6.45	4.51275E-4
0.40347	0.30055					0.40704	0.08298					6.46421	4.49033E-4
0.42551	0.81718					0.40734	0.08317					6.48413	4.45932E-4
0.40385	1.06288					0.40764	0.08331					6.50405	4.42877E-4
0.41217	1.36935					0.40793	0.0834					6.52397	4.39869E-4
0.41068	0.91023					0.40823	0.08344					6.54389	4.36905E-4
0.4069	1.62953					0.40853	0.08342					6.55	4.36005E-4
0.40236	0.52561					0.40882	0.08336					6.56381	4.33985E-4
0.4257	1.04534					0.40912	0.08324					6.58373	4.31109E-4
0.40578	1.30058					0.40942	0.08308					6.60365	4.28276E-4
0.39668	0.56682					0.4095	0.08303					6.62357	4.25484E-4
0.42833	0.63439					0.40972	0.08286					6.64349	4.22734E-4
0.45332	0.22525					0.41001	0.0826					6.65	4.21845E-4
0.42659	0.43731					0.41031	0.08229					6.66341	4.20025E-4
0.40097	1.47426					0.41061	0.08192					6.68333	4.17355E-4
0.42543	0.76712					0.41091	0.08151					6.70325	4.14725E-4
0.39142	1.08413					0.4112	0.08105					6.72317	4.12133E-4
0.40082	0.77785					0.4115	0.08055					6.74309	4.09579E-4
0.40499	1.44472					0.4118	0.08					6.75	4.08703E-4
0.40767	0.83702					0.41209	0.0794					6.76301	4.07063E-4
0.42132	0.40008					0.41239	0.07876					6.78293	4.04583E-4
0.4019	1.93068					0.4125	0.07852					6.80285	4.0214E-4
0.43231	0.81075					0.41269	0.07808					6.82277	3.99732E-4
0.41205	0.5813					0.41299	0.07736					6.84269	3.97359E-4
0.42746	0.70925					0.41328	0.0766					6.85	3.96497E-4
0.40462	0.53641					0.41358	0.0758					6.86261	3.95021E-4
0.39964	4.1524					0.41388	0.07496					6.88253	3.92716E-4
0.41799	0.56338					0.41418	0.07409					6.90245	3.90444E-4
0.42255	0.21525					0.41447	0.07319					6.92237	3.88205E-4
0.40663	3.4992					0.41477	0.07225					6.94229	3.85999E-4
0.40391	2.53181					0.41507	0.07128					6.95	3.85153E-4
0.406	1.47769					0.41536	0.07028					6.96221	3.83824E-4
0.39321	0.82348					0.4155	0.06981					6.98213	3.8168E-4
0.41826	0.55263					0.41566	0.06925					7.00205	3.79567E-4
0.40895	0.54662					0.41596	0.0682					7.02197	3.77484E-4
0.4055	3.47097					0.41626	0.06712					7.04189	3.7543E-4
0.44623	0.30882					0.41655	0.06602					7.05	3.74603E-4
0.4205	0.47448					0.41685	0.0649					7.06181	3.73406E-4
0.39432	0.65438					0.41715	0.06376					7.08173	3.71411E-4
0.40811	0.73395					0.41745	0.0626					7.10165	3.69444E-4
0.40417	4.4793					0.41774	0.06143					7.12157	3.67504E-4
0.38919	0.82416					0.41804	0.06024					7.14149	3.65592E-4
0.40235	0.74673					0.41834	0.05905					7.15	3.64784E-4
0.39771	1.18776					0.4185	0.05839					7.16141	3.63707E-4
0.44019	0.5336					0.41864	0.05784					7.18133	3.61849E-4
0.43643	0.90358					0.41893	0.05662					7.20125	3.60016E-4
0.40712	0.61412					0.41923	0.0554					7.22117	3.58209E-4
0.41263	1.473					0.41953	0.05417					7.24109	3.56428E-4
0.39585	2.28228					0.41982	0.05293					7.25	3.55639E-4
0.39899	2.04709					0.42012	0.0517					7.26101	3.54671E-4
0.41044	0.65375					0.42042	0.05046					7.28093	3.52939E-4
0.40801	2.35179					0.42072	0.04923					7.30085	3.51231E-4
0.40023	0.29464					0.42101	0.048					7.32077	3.49546E-4
0.4159	1.15606					0.42131	0.04677					7.34069	3.47885E-4
0.40023	1.92502					0.4215	0.04599					7.35	3.47117E-4
0.41791	0.72612					0.42161	0.04555					7.36061	3.46247E-4
0.43085	0.28682					0.42191	0.04433					7.38053	3.44631E-4
0.39406	1.80802					0.4222	0.04312					7.40045	3.43038E-4
0.40892	1.84205					0.4225	0.04193					7.42037	3.41467E-4
0.41599	0.59007					0.4228	0.04074					7.44029	3.39917E-4
0.41991	0.90127					0.42309	0.03956					7.45	3.39169E-4
0.41534	1.41498					0.42339	0.0384					7.46021	3.38388E-4
0.40667	1.37153					0.42369	0.03725					7.48013	3.36881E-4
0.39855	2.80745					0.42399	0.03612					7.50005	3.35394E-4
0.41482	1.37543					0.42428	0.035					7.51997	3.33927E-4
0.4557	0.31222					0.4245	0.0342					7.53989	3.3248E-4
0.42144	0.79404					0.42458	0.0339					7.55	3.31753E-4
0.39887	3.60696					0.42488	0.03281					7.55981	3.31053E-4
0.37786	0.77775					0.42518	0.03175					7.57973	3.29645E-4
0.40619	0.34241					0.42547	0.0307					7.59965	3.28256E-4
0.40228	2.95162					0.42577	0.02967					7.61957	3.26886E-4
0.42517	0.34058					0.42607	0.02866					7.63949	3.25535E-4
0.39844	2.65195					0.42636	0.02767					7.65	3.24829E-4
0.41515	0.79131					0.42666	0.02671					7.65941	3.24201E-4
0.39631	1.26585					0.42696	0.02576					7.67933	3.22886E-4
0.38894	1.30695					0.42726	0.02484					7.69925	3.21588E-4
0.43013	0.23881					0.4275	0.0241					7.71917	3.20308E-4
0.39605	0.98031					0.42755	0.02394					7.73909	3.19045E-4
0.42556	0.87318					0.42785	0.02306					7.75	3.1836E-4
0.41117	0.41628					0.42815	0.0222					7.75901	3.17798E-4
0.39503	2.82266					0.42845	0.02136					7.77893	3.16568E-4
0.39969	4.31445					0.42874	0.02055					7.79885	3.15355E-4
0.40266	1.50373					0.42904	0.01976					7.81877	3.14158E-4
0.39409	0.78002					0.42934	0.019					7.83869	3.12976E-4
0.39594	1.62365					0.42964	0.01825					7.85	3.12312E-4
0.40579	5.00821					0.42993	0.01753					7.85861	3.1181E-4
0.40438	1.00422					0.43023	0.01683					7.87853	3.1066E-4
0.42049	0.90373					0.4305	0.01622					7.89845	3.09525E-4
0.40581	2.97069					0.43053	0.01616					7.91837	3.08404E-4
0.3896	1.12896					0.43082	0.0155					7.93829	3.07299E-4
0.42196	0.25109					0.43112	0.01487					7.95	3.06656E-4
0.41048	1.12492					0.43142	0.01426					7.95821	3.06208E-4
0.43249	0.40935					0.43172	0.01367					7.97813	3.05131E-4
0.35739	1.80437					0.43201	0.0131					7.99805	3.04068E-4
0.41406	0.89995					0.43231	0.01255					8.01797	3.03019E-4
0.41657	0.47256					0.43261	0.01203					8.03789	3.01984E-4
0.40406	2.23841					0.43291	0.01152					8.05	3.01361E-4
0.39871	0.73943					0.4332	0.01103					8.05781	3.00963E-4
0.40657	2.77683					0.4335	0.01056					8.07773	2.99954E-4
0.40908	0.89262					0.4338	0.01011					8.09765	2.98959E-4
0.399	0.73807					0.43409	0.00968					8.11757	2.97976E-4
0.42273	0.27598					0.43439	0.00927					8.13749	2.97007E-4
0.41434	2.11633					0.43469	0.00888					8.15	2.96404E-4
0.4219	0.37184					0.43499	0.0085					8.15741	2.96049E-4
0.39813	1.20801					0.43528	0.00814					8.17733	2.95104E-4
0.40747	1.69944					0.43558	0.00779					8.19725	2.94172E-4
0.41691	0.89189					0.43588	0.00746					8.21717	2.93251E-4
0.3991	0.78146					0.43618	0.00714					8.23709	2.92342E-4
0.4215	0.34825					0.43647	0.00684					8.25	2.91759E-4
0.41505	0.39677					0.4365	0.00682					8.25701	2.91444E-4
0.40923	2.51757					0.43677	0.00656					8.27693	2.90559E-4
0.45397	0.23133					0.43707	0.00629					8.29685	2.89684E-4
0.40645	1.11281					0.43736	0.00603					8.31677	2.8882E-4
0.40855	0.47241					0.43766	0.00578					8.33669	2.87968E-4
0.43323	0.61885					0.43796	0.00555					8.35	2.87404E-4
0.40024	2.62266					0.43826	0.00533					8.35661	2.87126E-4
0.35798	0.35999					0.43855	0.00512					8.37653	2.86295E-4
0.4084	0.74879					0.43885	0.00492					8.39645	2.85475E-4
0.41898	0.99235					0.43915	0.00473					8.41637	2.84665E-4
0.40992	1.2508					0.43945	0.00455					8.43629	2.83865E-4
0.42972	0.74633					0.4395	0.00452					8.45	2.8332E-4
0.42361	1.05285					0.43974	0.00438					8.45621	2.83075E-4
0.41663	0.38521					0.44004	0.00422					8.47613	2.82295E-4
0.39969	1.27382					0.44034	0.00407					8.49605	2.81525E-4
0.41045	1.50608					0.44064	0.00393					8.51597	2.80764E-4
0.41237	2.0358					0.44093	0.00379					8.53589	2.80013E-4
0.39161	0.86374					0.44123	0.00367					8.55	2.79487E-4
0.41144	3.70816					0.44153	0.00355					8.55581	2.79272E-4
0.41132	0.4077					0.44182	0.00344					8.57573	2.78539E-4
0.42472	0.88745					0.44212	0.00333					8.59565	2.77816E-4
0.40612	0.63026					0.44242	0.00323					8.61557	2.77102E-4
0.40502	1.68747					0.4425	0.00321					8.63549	2.76396E-4
0.41282	0.64358					0.44272	0.00314					8.65	2.75888E-4
0.43002	0.33153					0.44301	0.00305					8.65541	2.757E-4
0.41603	0.3989					0.44331	0.00297					8.67533	2.75012E-4
0.44333	0.41533					0.44361	0.00289					8.69525	2.74332E-4
0.41049	0.51083					0.44391	0.00282					8.71517	2.73661E-4
0.41039	2.1125					0.4442	0.00275					8.73509	2.72998E-4
0.40497	0.64989					0.4445	0.00269					8.75	2.72507E-4
0.39628	1.69442					0.4448	0.00263					8.75501	2.72343E-4
0.41966	0.27273					0.44509	0.00258					8.77492	2.71697E-4
0.42921	0.29062					0.44539	0.00253					8.79484	2.71058E-4
0.42365	1.0057					0.4455	0.00251					8.81476	2.70427E-4
0.40649	1.20682					0.44569	0.00248					8.83468	2.69804E-4
0.44079	0.23571					0.44599	0.00243					8.85	2.6933E-4
0.47583	0.21034					0.44628	0.00239					8.8546	2.69188E-4
0.44517	0.29303					0.44658	0.00235					8.87452	2.6858E-4
0.41262	1.20907					0.44688	0.00232					8.89444	2.67979E-4
0.40316	1.00356					0.44718	0.00228					8.91436	2.67386E-4
0.42616	0.89098					0.44747	0.00225					8.93428	2.66799E-4
0.41859	0.27277					0.44777	0.00222					8.95	2.66342E-4
0.40357	0.83582					0.44807	0.0022					8.9542	2.6622E-4
0.44457	0.2646					0.44836	0.00217					8.97412	2.65648E-4
0.41281	0.73824					0.4485	0.00216					8.99404	2.65083E-4
0.4056	0.74164					0.44866	0.00215					9.01396	2.64524E-4
0.44931	2.17144					0.44896	0.00213					9.03388	2.63972E-4
0.38737	3.85746					0.44926	0.00211					9.05	2.63531E-4
0.42183	1.84701					0.44955	0.00209					9.0538	2.63427E-4
0.39982	1.11118					0.44985	0.00207					9.07372	2.62889E-4
0.3975	2.04587					0.45015	0.00206					9.09364	2.62357E-4
0.39566	0.62017					0.45045	0.00205					9.11356	2.61831E-4
0.39526	0.70626					0.45074	0.00203					9.13348	2.61311E-4
0.42801	0.27788					0.45104	0.00202					9.15	2.60885E-4
0.40019	0.85353					0.45134	0.00201					9.1534	2.60798E-4
0.40231	1.90294					0.4515	0.002					9.17332	2.60291E-4
0.39979	1.45193					0.45164	0.002					9.19324	2.5979E-4
0.40031	1.14213					0.45193	0.00199					9.21316	2.59294E-4
0.43838	0.42879					0.45223	0.00198					9.23308	2.58805E-4
0.4167	0.58457					0.45253	0.00197					9.25	2.58394E-4
0.42294	0.38292					0.45282	0.00197					9.253	2.58321E-4
0.41914	1.50644					0.45312	0.00196					9.27292	2.57844E-4
0.39779	1.23022					0.45342	0.00195					9.29284	2.57371E-4
0.40916	1.45951					0.45372	0.00195					9.31276	2.56905E-4
0.4105	0.83214					0.45401	0.00194					9.33268	2.56444E-4
0.41135	0.47641					0.45431	0.00194					9.35	2.56047E-4
0.40335	1.88198					0.4545	0.00193					9.3526	2.55988E-4
0.39938	2.15732					0.45461	0.00193					9.37252	2.55537E-4
0.40883	0.61584					0.45491	0.00193					9.39244	2.55092E-4
0.39564	0.23851					0.4552	0.00193					9.41236	2.54652E-4
0.42487	0.40734					0.4555	0.00192					9.43228	2.54217E-4
0.39405	3.31112					0.4558	0.00192					9.45	2.53835E-4
0.39517	1.74836					0.45609	0.00192					9.4522	2.53788E-4
0.40932	0.35421					0.45639	0.00191					9.47212	2.53363E-4
0.42777	0.91035					0.45669	0.00191					9.49204	2.52943E-4
0.42704	1.14796					0.45699	0.00191					9.51196	2.52528E-4
0.3134	0.42597					0.45728	0.00191					9.53188	2.52118E-4
0.42302	0.85297					0.4575	0.00191					9.55	2.51749E-4
0.41503	0.43237					0.45758	0.00191					9.5518	2.51713E-4
0.41068	1.2133					0.45788	0.0019					9.57172	2.51312E-4
0.39386	0.65355					0.45818	0.0019					9.59164	2.50916E-4
0.40712	0.71577					0.45847	0.0019					9.61156	2.50525E-4
0.41258	1.59923					0.45877	0.0019					9.63148	2.50138E-4
0.40661	0.48432					0.45907	0.0019					9.65	2.49782E-4
0.40995	0.30741					0.45936	0.0019					9.6514	2.49755E-4
0.44727	0.2965					0.45966	0.0019					9.67132	2.49377E-4
0.41144	0.44859					0.45996	0.0019					9.69124	2.49003E-4
0.42491	0.33913					0.46026	0.0019					9.71116	2.48633E-4
0.39945	2.6664					0.4605	0.0019					9.73108	2.48268E-4
0.41119	1.13145					0.46055	0.0019					9.75	2.47925E-4
0.40428	0.77628					0.46085	0.0019					9.751	2.47907E-4
0.4108	0.71883					0.46115	0.0019					9.77092	2.4755E-4
0.42509	0.7087					0.46145	0.00189					9.79084	2.47197E-4
0.40816	0.63626					0.46174	0.00189					9.81076	2.46848E-4
0.40828	2.42613					0.46204	0.00189					9.83068	2.46503E-4
0.41053	0.57186					0.46234	0.00189					9.85	2.46172E-4
0.42901	0.51014					0.46264	0.00189					9.8506	2.46162E-4
0.39911	1.49493					0.46293	0.00189					9.87052	2.45824E-4
0.4495	0.24761					0.46323	0.00189					9.89044	2.45491E-4
0.39161	1.97235					0.4635	0.00189					9.91036	2.45161E-4
0.40855	0.89915					0.46353	0.00189					9.93028	2.44835E-4
0.41514	0.79708					0.46382	0.00189					9.95	2.44516E-4
0.40093	1.93243					0.46412	0.00189					9.9502	2.44513E-4
0.41447	0.50534					0.46442	0.00189					9.97012	2.44194E-4
0.40166	1.259					0.46472	0.00189					9.99004	2.43879E-4
0.41255	0.39429					0.46501	0.00189					10.01	2.43568E-4
0.40727	1.16845					0.46531	0.00189					10.0299	2.43259E-4
0.38868	3.3438					0.46561	0.00189					10.0498	2.42955E-4
0.40699	0.96077					0.46591	0.00189					10.05	2.42952E-4
0.40466	1.82299					0.4662	0.00189					10.0697	2.42654E-4
0.44134	0.20673					0.4665	0.00189					10.0896	2.42356E-4
0.40713	3.35233					0.4668	0.00189					10.1096	2.42061E-4
0.40086	2.72188					0.46709	0.00189					10.1295	2.4177E-4
0.38857	7.29415					0.46739	0.00189					10.1494	2.41482E-4
0.40406	4.05696					0.46769	0.00189					10.15	2.41473E-4
0.39033	2.90723					0.46799	0.00189					10.1693	2.41197E-4
0.39266	0.63173					0.46828	0.00189					10.1892	2.40915E-4
0.41224	1.14267					0.46858	0.00189					10.2092	2.40636E-4
0.4312	0.40697					0.46888	0.00189					10.2291	2.40361E-4
0.41233	2.91654					0.46918	0.00189					10.249	2.40088E-4
0.42205	0.34268					0.46947	0.00189					10.25	2.40075E-4
0.4258	0.39567					0.4695	0.00189					10.2689	2.39819E-4
0.39856	2.01015					0.46977	0.00189					10.2888	2.39552E-4
0.40888	1.63096					0.47007	0.00189					10.3088	2.39288E-4
0.41905	0.98843					0.47036	0.00189					10.3287	2.39028E-4
0.40365	0.909					0.47066	0.00189					10.3486	2.3877E-4
0.41567	0.80841					0.47096	0.00189					10.35	2.38752E-4
0.39593	1.48438					0.47126	0.00189					10.3685	2.38515E-4
0.40069	2.95935					0.47155	0.00189					10.3884	2.38262E-4
0.39444	3.11208					0.47185	0.00189					10.4084	2.38013E-4
0.41006	2.3534					0.47215	0.00189					10.4283	2.37766E-4
0.41048	0.93827					0.47245	0.00189					10.4482	2.37522E-4
0.4286	0.32045					0.4725	0.00189					10.45	2.375E-4
0.40118	3.42617					0.47274	0.00189					10.4681	2.3728E-4
0.41466	0.98699					0.47304	0.00189					10.488	2.37041E-4
0.36913	0.39444					0.47334	0.00189					10.508	2.36805E-4
0.33028	1.2153					0.47364	0.00189					10.5279	2.36571E-4
0.36168	7.37194					0.47393	0.00189					10.5478	2.3634E-4
0.36243	0.66485					0.47423	0.00189					10.55	2.36314E-4
0.35382	1.83077					0.47453	0.00189					10.5677	2.36111E-4
0.36376	0.62544					0.47482	0.00189					10.5876	2.35885E-4
0.37741	1.50808					0.47512	0.00189					10.6076	2.35661E-4
0.3327	0.59153					0.47542	0.00189					10.6275	2.3544E-4
0.40637	0.59617					0.4755	0.00189					10.6474	2.3522E-4
0.42882	1.08399					0.47572	0.00189					10.65	2.35192E-4
0.40544	4.51634					0.47601	0.00189					10.6673	2.35004E-4
0.39376	0.49134					0.47631	0.00189					10.6872	2.34789E-4
0.43017	0.35141					0.47661	0.00189					10.7072	2.34577E-4
0.40972	0.65967					0.47691	0.00189					10.7271	2.34367E-4
0.3949	2.64514					0.4772	0.00189					10.747	2.3416E-4
0.41479	3.27244					0.4775	0.00189					10.75	2.34129E-4
0.42192	0.52053					0.4778	0.00189					10.7669	2.33954E-4
0.40586	1.62665					0.47809	0.00189					10.7868	2.33751E-4
0.41219	1.21435					0.47839	0.00189					10.8068	2.3355E-4
0.42232	0.56973					0.4785	0.00189					10.8267	2.33351E-4
0.39645	0.98793					0.47869	0.00189					10.8466	2.33154E-4
0.40301	2.7313					0.47899	0.00189					10.85	2.33121E-4
0.41339	1.26422					0.47928	0.00189					10.8665	2.32959E-4
0.40382	1.51868					0.47958	0.00189					10.8864	2.32767E-4
0.40911	0.83722					0.47988	0.00189					10.9064	2.32576E-4
0.41105	0.84476					0.48018	0.00189					10.9263	2.32387E-4
0.43571	0.40807					0.48047	0.00189					10.9462	2.32201E-4
0.40304	1.04917					0.48077	0.00189					10.95	2.32165E-4
0.41103	0.766					0.48107	0.00189					10.9661	2.32016E-4
0.40432	0.40735					0.48136	0.00189					10.986	2.31833E-4
0.40466	1.27972					0.4815	0.00189					11.006	2.31652E-4
0.42389	0.47125					0.48166	0.00189					11.0259	2.31473E-4
0.39915	1.57971					0.48196	0.00189					11.0458	2.31296E-4
0.41444	1.4298					0.48226	0.00189					11.05	2.31259E-4
0.40403	0.23378					0.48255	0.00189					11.0657	2.31121E-4
0.40709	2.13588					0.48285	0.00189					11.0856	2.30947E-4
0.40187	2.12966					0.48315	0.00189					11.1056	2.30776E-4
0.39376	0.47164					0.48345	0.00189					11.1255	2.30606E-4
0.41424	0.20373					0.48374	0.00189					11.1454	2.30438E-4
0.42743	0.3438					0.48404	0.00189					11.15	2.30399E-4
0.40122	0.7268					0.48434	0.00189					11.1653	2.30271E-4
0.43741	0.40095					0.4845	0.00189					11.1852	2.30107E-4
0.42013	0.33055					0.48464	0.00189					11.2052	2.29944E-4
0.41981	3.35439					0.48493	0.00189					11.2251	2.29783E-4
0.44341	0.23858					0.48523	0.00189					11.245	2.29623E-4
0.40843	0.44837					0.48553	0.00189					11.25	2.29583E-4
0.41421	2.21945					0.48582	0.00189					11.2649	2.29465E-4
0.39676	0.43687					0.48612	0.00189					11.2848	2.29309E-4
0.41476	1.15514					0.48642	0.00189					11.3048	2.29154E-4
0.45106	0.31766					0.48672	0.00189					11.3247	2.29001E-4
0.41182	0.65552					0.48701	0.00189					11.3446	2.28849E-4
0.44579	0.23286					0.48731	0.00189					11.35	2.28808E-4
0.40153	1.18799					0.4875	0.00189					11.3645	2.28699E-4
0.40776	1.50766					0.48761	0.00189					11.3844	2.28551E-4
0.4417	0.31024					0.48791	0.00189					11.4044	2.28404E-4
0.38787	1.30774					0.4882	0.00189					11.4243	2.28258E-4
0.40331	1.66666					0.4885	0.00189					11.4442	2.28114E-4
0.40103	0.37369					0.4888	0.00189					11.45	2.28073E-4
0.4105	1.88588					0.48909	0.00189					11.4641	2.27972E-4
0.44289	0.24082					0.48939	0.00189					11.484	2.27831E-4
0.4247	0.20768					0.48969	0.00189					11.5039	2.27691E-4
0.38821	1.2795					0.48999	0.00189					11.5239	2.27553E-4
0.4088	0.80465					0.49028	0.00189					11.5438	2.27416E-4
0.39695	1.04296					0.4905	0.00189					11.55	2.27374E-4
0.40809	1.14056					0.49058	0.00189					11.5637	2.27281E-4
0.40891	0.92233					0.49088	0.00189					11.5836	2.27147E-4
0.39771	0.67522					0.49118	0.00189					11.6036	2.27014E-4
0.41547	0.57161					0.49147	0.00189					11.6235	2.26883E-4
0.41258	1.29165					0.49177	0.00189					11.6434	2.26752E-4
0.41555	1.609					0.49207	0.00189					11.65	2.2671E-4
0.38552	0.44678					0.49236	0.00189					11.6633	2.26624E-4
0.39964	2.2303					0.49266	0.00189					11.6832	2.26496E-4
0.41907	0.59744					0.49296	0.00189					11.7032	2.2637E-4
0.4241	0.64986					0.49326	0.00189					11.7231	2.26245E-4
0.40723	1.19148					0.4935	0.00189					11.743	2.26122E-4
0.42071	0.28856					0.49355	0.00189					11.75	2.26078E-4
0.42271	0.96652					0.49385	0.00189					11.7629	2.25999E-4
0.41673	0.53693					0.49415	0.00189					11.7828	2.25878E-4
0.3964	4.59384					0.49445	0.00189					11.8027	2.25758E-4
0.3998	1.83142					0.49474	0.00189					11.8227	2.25639E-4
0.394	0.36316					0.49504	0.00189					11.8426	2.25521E-4
0.4092	1.41629					0.49534	0.00189					11.85	2.25478E-4
0.40914	0.71219					0.49564	0.00189					11.8625	2.25405E-4
0.45424	0.22278					0.49593	0.00189					11.8824	2.2529E-4
0.42038	0.94279					0.49623	0.00189					11.9024	2.25175E-4
0.41393	0.61493					0.4965	0.00189					11.9223	2.25062E-4
0.4105	0.75005					0.49653	0.00189					11.9422	2.2495E-4
0.41263	0.71527					0.49682	0.00189					11.95	2.24907E-4
0.41306	2.48212					0.49712	0.00189					11.9621	2.2484E-4
0.39684	1.61787					0.49742	0.00189					11.982	2.2473E-4
0.39277	0.80093					0.49772	0.00189					12.002	2.24621E-4
0.45261	0.37103					0.49801	0.00189					12.0219	2.24514E-4
0.40342	2.19956					0.49831	0.00189					12.0418	2.24407E-4
0.43535	0.4092					0.49861	0.00189					12.05	2.24364E-4
0.40118	1.70994					0.49891	0.00189					12.0617	2.24302E-4
0.41517	0.81202					0.4992	0.00189					12.0816	2.24197E-4
0.41354	2.40331					0.4995	0.00189					12.1015	2.24094E-4
0.42005	1.47973					0.4998	0.00189					12.1215	2.23991E-4
0.40684	3.72611					0.50009	0.00189					12.1414	2.2389E-4
0.42242	0.24987					0.50039	0.00189					12.15	2.23846E-4
0.40435	0.82449					0.50069	0.00189					12.1613	2.2379E-4
0.41398	0.21956					0.50099	0.00189					12.1812	2.2369E-4
0.40152	1.22636					0.50128	0.00189					12.2012	2.23592E-4
0.40807	4.08629					0.50158	0.00189					12.2211	2.23494E-4
0.40584	0.94795					0.50188	0.00189					12.241	2.23398E-4
0.4161	0.64543					0.50218	0.00189					12.25	2.23354E-4
0.39063	1.85582					0.50247	0.00189					12.2609	2.23302E-4
0.41487	2.45276					0.5025	0.00189					12.2808	2.23207E-4
0.40346	2.38265					0.50277	0.00189					12.3008	2.23113E-4
0.40144	2.60712					0.50307	0.00189					12.3207	2.2302E-4
0.4006	1.5284					0.50336	0.00189					12.3406	2.22928E-4
0.41207	0.76338					0.50366	0.00189					12.35	2.22885E-4
0.42926	0.42493					0.50396	0.00189					12.3605	2.22837E-4
0.41296	0.40575					0.50426	0.00189					12.3804	2.22747E-4
0.41134	0.69478					0.50455	0.00189					12.4003	2.22658E-4
0.42073	0.61697					0.50485	0.00189					12.4203	2.22569E-4
0.41594	0.45101					0.50515	0.00189					12.4402	2.22482E-4
0.39153	0.69868					0.50545	0.00189					12.45	2.22439E-4
0.36917	0.58381					0.5055	0.00189					12.4601	2.22395E-4
0.35265	0.64737					0.50574	0.00189					12.48	2.22309E-4
0.36909	0.70014					0.50604	0.00189					12.5	2.22224E-4
0.3666	4.61532					0.50634	0.00189					12.5199	2.22139E-4
0.36489	3.32398					0.50664	0.00189					12.5398	2.22056E-4
0.36237	0.39643					0.50693	0.00189					12.55	2.22013E-4
0.40132	0.59203					0.50723	0.00189					12.5597	2.21973E-4
0.37238	4.55215					0.50753	0.00189					12.5796	2.21891E-4
0.41584	0.50229					0.50782	0.00189					12.5996	2.2181E-4
0.40274	2.46821					0.50812	0.00189					12.6195	2.21729E-4
0.41578	0.64086					0.50842	0.00189					12.6394	2.2165E-4
0.3905	0.69087					0.5085	0.00189					12.65	2.21608E-4
0.41457	1.6881					0.50872	0.00189					12.6593	2.21571E-4
0.39812	2.06007					0.50901	0.00189					12.6792	2.21493E-4
0.4124	2.11083					0.50931	0.00189					12.6991	2.21415E-4
0.40862	0.56692					0.50961	0.00189					12.7191	2.21339E-4
0.41449	0.9513					0.50991	0.00189					12.739	2.21263E-4
0.39835	1.33226					0.5102	0.00189					12.75	2.21221E-4
0.42601	0.28089					0.5105	0.00189					12.7589	2.21187E-4
0.39781	1.40522					0.5108	0.00189					12.7788	2.21113E-4
0.42973	0.27414					0.51109	0.00189					12.7988	2.21039E-4
0.4101	0.69686					0.51139	0.00189					12.8187	2.20966E-4
0.39753	1.75727					0.5115	0.00189					12.8386	2.20893E-4
0.42286	0.45656					0.51169	0.00189					12.85	2.20852E-4
0.40709	1.06783					0.51199	0.00189					12.8585	2.20822E-4
0.41608	0.51976					0.51228	0.00189					12.8784	2.2075E-4
0.39372	3.44709					0.51258	0.00189					12.8984	2.2068E-4
0.42833	0.39304					0.51288	0.00189					12.9183	2.2061E-4
0.40025	2.09785					0.51318	0.00189					12.9382	2.20541E-4
0.39874	1.20193					0.51347	0.00189					12.95	2.205E-4
0.39569	2.63182					0.51377	0.00189					12.9581	2.20473E-4
0.44902	0.33501					0.51407	0.00189					12.978	2.20405E-4
0.43474	0.35698					0.51436	0.00189					12.9979	2.20337E-4
0.42225	0.40744					0.5145	0.00189					13.0179	2.20271E-4
0.4037	0.40381					0.51466	0.00189					13.0378	2.20205E-4
0.40823	1.14732					0.51496	0.00189					13.05	2.20165E-4
0.40714	1.37194					0.51526	0.00189					13.0577	2.20139E-4
0.44523	0.20461					0.51555	0.00189					13.0776	2.20075E-4
0.40449	2.43671					0.51585	0.00189					13.0976	2.20011E-4
0.40861	1.21963					0.51615	0.00189					13.1175	2.19947E-4
0.40867	1.3243					0.51645	0.00189					13.1374	2.19884E-4
0.40288	1.29614					0.51674	0.00189					13.15	2.19844E-4
0.39957	0.98442					0.51704	0.00189					13.1573	2.19822E-4
0.41266	0.603					0.51734	0.00189					13.1772	2.1976E-4
0.3923	0.4197					0.5175	0.00189					13.1972	2.19698E-4
0.43894	0.2049					0.51764	0.00189					13.2171	2.19638E-4
0.40027	1.90312					0.51793	0.00189					13.237	2.19578E-4
0.37949	0.94837					0.51823	0.00189					13.25	2.19539E-4
0.41062	1.53049					0.51853	0.00189					13.2569	2.19518E-4
0.39192	0.74198					0.51882	0.00189					13.2768	2.19459E-4
0.41872	0.70875					0.51912	0.00189					13.2967	2.194E-4
0.39932	0.63595					0.51942	0.00189					13.3167	2.19342E-4
0.39707	3.80584					0.51972	0.00189					13.3366	2.19285E-4
0.42093	0.58981					0.52001	0.00189					13.35	2.19247E-4
0.40806	1.14305					0.52031	0.00189					13.3565	2.19228E-4
0.39064	2.05261					0.5205	0.00189					13.3764	2.19172E-4
0.45092	0.2411					0.52061	0.00189					13.3963	2.19116E-4
0.44625	0.3271					0.52091	0.00189					13.4163	2.1906E-4
0.44542	0.39724					0.5212	0.00189					13.4362	2.19005E-4
0.3905	3.32789					0.5215	0.00189					13.45	2.18968E-4
0.41399	1.83585					0.5218	0.00189					13.4561	2.18951E-4
0.39473	0.75197					0.52209	0.00189					13.476	2.18897E-4
0.47782	0.22367					0.52239	0.00189					13.496	2.18844E-4
0.40419	1.7306					0.52269	0.00189					13.5159	2.18791E-4
0.3954	1.88805					0.52299	0.00189					13.5358	2.18738E-4
0.3986	0.65744					0.52328	0.00189					13.55	2.18701E-4
0.43054	0.21212					0.5235	0.00189					13.5557	2.18686E-4
0.47817	0.20625					0.52358	0.00189					13.5756	2.18635E-4
0.40547	0.73041					0.52388	0.00189					13.5955	2.18584E-4
0.41485	1.43876					0.52418	0.00189					13.6155	2.18533E-4
0.40652	0.74757					0.52447	0.00189					13.6354	2.18483E-4
0.44383	0.32475					0.52477	0.00189					13.65	2.18446E-4
0.4182	0.57404					0.52507	0.00189					13.6553	2.18433E-4
0.41286	1.38434					0.52536	0.00189					13.6752	2.18384E-4
0.40128	2.31818					0.52566	0.00189					13.6951	2.18335E-4
0.43463	0.20605					0.52596	0.00189					13.7151	2.18287E-4
0.39938	2.58042					0.52626	0.00189					13.735	2.18239E-4
0.41298	0.60636					0.5265	0.00189					13.75	2.18203E-4
0.3975	2.1876					0.52655	0.00189					13.7549	2.18191E-4
0.40666	2.21739					0.52685	0.00189					13.7748	2.18144E-4
0.4349	0.45169					0.52715	0.00189					13.7947	2.18098E-4
0.3924	1.67214					0.52745	0.00189					13.8147	2.18051E-4
0.40412	2.51962					0.52774	0.00189					13.8346	2.18006E-4
0.42678	0.55457					0.52804	0.00189					13.85	2.1797E-4
0.40596	0.92954					0.52834	0.00189					13.8545	2.1796E-4
0.43772	0.30093					0.52864	0.00189					13.8744	2.17915E-4
0.43702	0.25291					0.52893	0.00189					13.8943	2.1787E-4
0.41535	0.85541					0.52923	0.00189					13.9143	2.17826E-4
0.40883	0.5685					0.5295	0.00189					13.9342	2.17782E-4
0.40395	2.00732					0.52953	0.00189					13.95	2.17748E-4
0.4122	0.29991					0.52982	0.00189					13.9541	2.17739E-4
0.45008	0.23068					0.53012	0.00189					13.974	2.17696E-4
0.4227	0.42022					0.53042	0.00189					13.9939	2.17653E-4
0.44063	0.25061					0.53072	0.00189					14.0139	2.17611E-4
0.41482	0.24762					0.53101	0.00189					14.0338	2.17569E-4
0.41417	0.51027					0.53131	0.00189					14.05	2.17535E-4
0.42343	0.53524					0.53161	0.00189					14.0537	2.17527E-4
0.42532	0.72486					0.53191	0.00189					14.0736	2.17486E-4
0.42769	0.40856					0.5322	0.00189					14.0935	2.17445E-4
0.40226	1.08757					0.5325	0.00189					14.1135	2.17405E-4
0.38166	2.62026					0.5328	0.00189					14.1334	2.17365E-4
0.24129	0.42894					0.53309	0.00189					14.15	2.17331E-4
0.42762	0.44246					0.53339	0.00189					14.1533	2.17325E-4
0.4023	4.74772					0.53369	0.00189					14.1732	2.17285E-4
0.39784	1.02862					0.53399	0.00189					14.1931	2.17246E-4
0.40903	3.66787					0.53428	0.00189					14.2131	2.17207E-4
0.41783	0.51354					0.53458	0.00189					14.233	2.17169E-4
0.41028	0.78357					0.53488	0.00189					14.25	2.17136E-4
0.41726	0.49873					0.53518	0.00189					14.2529	2.17131E-4
0.39076	1.05521					0.53547	0.00189					14.2728	2.17093E-4
0.41733	0.50693					0.5355	0.00189					14.2927	2.17056E-4
0.42716	0.74143					0.53577	0.00189					14.3127	2.17019E-4
0.40584	0.70851					0.53607	0.00189					14.3326	2.16982E-4
0.39575	0.66913					0.53636	0.00189					14.35	2.1695E-4
0.44885	0.30204					0.53666	0.00189					14.3525	2.16945E-4
0.40542	0.61293					0.53696	0.00189					14.3724	2.16909E-4
0.41514	0.39828					0.53726	0.00189					14.3923	2.16873E-4
0.42891	0.74996					0.53755	0.00189					14.4123	2.16838E-4
0.41962	0.51531					0.53785	0.00189					14.4322	2.16803E-4
0.40938	0.4509					0.53815	0.00189					14.45	2.16771E-4
0.42398	0.51248					0.53845	0.00189					14.4521	2.16768E-4
0.41018	0.67492					0.5385	0.00189					14.472	2.16733E-4
0.41652	1.16636					0.53874	0.00189					14.4919	2.16699E-4
0.44863	0.4387					0.53904	0.00189					14.5119	2.16665E-4
0.40859	0.66889					0.53934	0.00189					14.5318	2.16631E-4
0.41824	1.11469					0.53964	0.00189					14.55	2.166E-4
0.40108	1.39035					0.53993	0.00189					14.5517	2.16597E-4
0.40291	2.77554					0.54023	0.00189					14.5716	2.16564E-4
0.38403	2.67129					0.54053	0.00189					14.5915	2.16531E-4
0.43071	0.61749					0.54082	0.00189					14.6115	2.16499E-4
0.41772	0.43213					0.54112	0.00189					14.6314	2.16466E-4
0.44232	0.33906					0.54142	0.00189					14.65	2.16436E-4
0.41346	1.12892					0.5415	0.00189					14.6513	2.16434E-4
0.4057	0.56092					0.54172	0.00189					14.6712	2.16403E-4
0.39056	0.60322					0.54201	0.00189					14.6911	2.16371E-4
0.40082	1.45459					0.54231	0.00189					14.7111	2.1634E-4
0.40196	0.85938					0.54261	0.00189					14.731	2.16309E-4
0.41014	0.34052					0.54291	0.00189					14.75	2.16279E-4
0.39146	1.76045					0.5432	0.00189					14.7509	2.16278E-4
0.4253	0.27266					0.5435	0.00189					14.7708	2.16248E-4
0.39356	1.61156					0.5438	0.00189					14.7907	2.16217E-4
0.4247	0.66735					0.54409	0.00189					14.8107	2.16187E-4
0.4179	0.28592					0.54439	0.00189					14.8306	2.16158E-4
0.39462	0.3401					0.5445	0.00189					14.85	2.16129E-4
0.39923	2.03681					0.54469	0.00189					14.8505	2.16128E-4
0.42342	0.55843					0.54499	0.00189					14.8704	2.16099E-4
0.40349	0.86488					0.54528	0.00189					14.8903	2.1607E-4
0.41175	0.4699					0.54558	0.00189					14.9103	2.16041E-4
0.43204	0.32615					0.54588	0.00189					14.9302	2.16013E-4
0.418	0.38019					0.54618	0.00189					14.95	2.15985E-4
0.40815	1.44672					0.54647	0.00189					14.9501	2.15985E-4
0.41053	0.9289					0.54677	0.00189					14.97	2.15957E-4
0.41407	0.66484					0.54707	0.00189					14.9899	2.15929E-4
0.40516	2.28132					0.54736	0.00189					15.0099	2.15902E-4
0.39995	1.22645					0.5475	0.00189					15.0298	2.15874E-4
0.14627	0.20673					0.54766	0.00189					15.0497	2.15847E-4
0.41164	1.93937					0.54796	0.00189					15.05	2.15847E-4
0.41223	0.62088					0.54826	0.00189					15.0696	2.1582E-4
0.40363	2.16141					0.54855	0.00189					15.0895	2.15794E-4
0.41197	0.39801					0.54885	0.00189					15.1095	2.15767E-4
0.40367	2.86874					0.54915	0.00189					15.1294	2.15741E-4
0.39758	3.15065					0.54945	0.00189					15.1493	2.15715E-4
0.41115	0.32002					0.54974	0.00189					15.15	2.15714E-4
0.4022	0.35395					0.55004	0.00189					15.1692	2.15689E-4
0.40975	1.02376					0.55034	0.00189					15.1891	2.15664E-4
0.40105	3.47075					0.5505	0.00189					15.2091	2.15639E-4
0.41267	1.22232					0.55064	0.00189					15.229	2.15613E-4
0.39709	1.40141					0.55093	0.00189					15.2489	2.15589E-4
0.41444	0.81661					0.55123	0.00189					15.25	2.15587E-4
0.42311	0.48062					0.55153	0.00189					15.2688	2.15564E-4
0.41055	0.6586					0.55182	0.00189					15.2887	2.15539E-4
0.40668	2.47643					0.55212	0.00189					15.3087	2.15515E-4
0.41174	0.57793					0.55242	0.00189					15.3286	2.15491E-4
0.40668	0.75083					0.55272	0.00189					15.3485	2.15467E-4
0.4088	0.88903					0.55301	0.00189					15.35	2.15465E-4
0.39507	1.11851					0.55331	0.00189					15.3684	2.15443E-4
0.39763	0.57433					0.5535	0.00189					15.3883	2.1542E-4
0.38064	1.65557					0.55361	0.00189					15.4083	2.15397E-4
0.39565	1.26018					0.55391	0.00189					15.4282	2.15373E-4
0.39967	0.22782					0.5542	0.00189					15.4481	2.15351E-4
0.38795	5.18068					0.5545	0.00189					15.45	2.15348E-4
0.36229	0.21668					0.5548	0.00189					15.468	2.15328E-4
0.42188	0.33535					0.55509	0.00189					15.4879	2.15305E-4
0.44848	0.25484					0.55539	0.00189					15.5079	2.15283E-4
0.42456	0.37087					0.55569	0.00189					15.5278	2.15261E-4
0.40891	0.80439					0.55599	0.00189					15.5477	2.15239E-4
0.41009	0.50228					0.55628	0.00189					15.55	2.15236E-4
0.41105	0.68874					0.5565	0.00189					15.5676	2.15217E-4
0.4229	0.5876					0.55658	0.00189					15.5875	2.15195E-4
0.41239	1.60723					0.55688	0.00189					15.6075	2.15174E-4
0.38181	0.53603					0.55718	0.00189					15.6274	2.15152E-4
0.38063	0.73647					0.55747	0.00189					15.6473	2.15131E-4
0.41711	1.02157					0.55777	0.00189					15.65	2.15128E-4
0.41215	0.2397					0.55807	0.00189					15.6672	2.1511E-4
0.40516	1.18231					0.55836	0.00189					15.6871	2.1509E-4
0.40671	1.29609					0.55866	0.00189					15.7071	2.15069E-4
0.38569	1.42902					0.55896	0.00189					15.727	2.15048E-4
0.39352	0.39936					0.55926	0.00189					15.7469	2.15028E-4
0.39144	1.03004					0.5595	0.00189					15.75	2.15025E-4
0.38284	1.79059					0.55955	0.00189					15.7668	2.15008E-4
0.42959	0.42134					0.55985	0.00189					15.7867	2.14988E-4
0.42102	0.51471					0.56015	0.00189					15.8067	2.14968E-4
0.40663	1.82494					0.56045	0.00189					15.8266	2.14949E-4
0.40508	2.45204					0.56074	0.00189					15.8465	2.14929E-4
0.42531	1.09481					0.56104	0.00189					15.85	2.14926E-4
0.39839	0.98512					0.56134	0.00189					15.8664	2.1491E-4
0.44184	0.21918					0.56164	0.00189					15.8863	2.14891E-4
0.39603	0.50102					0.56193	0.00189					15.9063	2.14872E-4
0.40265	2.17822					0.56223	0.00189					15.9262	2.14853E-4
0.4007	2.44977					0.5625	0.00189					15.9461	2.14834E-4
0.41315	1.16624					0.56253	0.00189					15.95	2.1483E-4
0.40341	1.15754					0.56282	0.00189					15.966	2.14815E-4
0.41356	0.31266					0.56312	0.00189					15.9859	2.14797E-4
0.39968	1.21178					0.56342	0.00189					16.05	2.14739E-4
0.414	1.20333					0.56372	0.00189					16.15	2.14651E-4
0.40629	0.85574					0.56401	0.00189					16.25	2.14566E-4
0.39616	1.20883					0.56431	0.00189					16.35	2.14485E-4
0.40049	1.20756					0.56461	0.00189					16.45	2.14407E-4
0.39572	0.98818					0.56491	0.00189					16.55	2.14332E-4
0.40593	0.4205					0.5652	0.00189					16.65	2.1426E-4
0.39567	4.30442					0.5655	0.00189					16.75	2.1419E-4
0.39091	1.82559					0.5658	0.00189					16.85	2.14123E-4
0.40869	0.95264					0.56609	0.00189					16.95	2.14059E-4
0.41737	0.5275					0.56639	0.00189					17.05	2.13997E-4
0.43323	0.28847					0.56669	0.00189					17.15	2.13938E-4
0.38926	0.48402					0.56699	0.00189					17.25	2.1388E-4
0.43223	0.40692					0.56728	0.00189					17.35	2.13825E-4
0.41105	0.58411					0.56758	0.00189					17.45	2.13772E-4
0.41778	0.46189					0.56788	0.00189					17.55	2.13721E-4
0.42807	0.21152					0.56818	0.00189					17.65	2.13672E-4
0.39867	0.3349					0.56847	0.00189					17.75	2.13624E-4
0.41934	0.99881					0.5685	0.00189					17.85	2.13578E-4
0.41023	3.0174					0.56877	0.00189					17.95	2.13534E-4
0.42125	0.29002					0.56907	0.00189					18.05	2.13492E-4
0.45769	0.26396					0.56936	0.00189					18.15	2.13451E-4
0.4232	0.3694					0.56966	0.00189					18.25	2.13411E-4
0.40676	0.49864					0.56996	0.00189					18.35	2.13373E-4
0.41399	0.82079					0.57026	0.00189					18.45	2.13337E-4
0.41466	0.80537					0.57055	0.00189					18.55	2.13301E-4
0.37225	2.54702					0.57085	0.00189					18.65	2.13267E-4
0.40562	0.26051					0.57115	0.00189					18.75	2.13234E-4
0.40993	1.4074					0.57145	0.00189					18.85	2.13202E-4
0.38914	2.86853					0.5715	0.00189					18.95	2.13171E-4
0.42085	5.35869					0.57174	0.00189					19.05	2.13142E-4
0.436	0.48509					0.5745	0.00189					19.15	2.13113E-4
0.42724	0.33993					0.5775	0.00189					19.25	2.13086E-4
0.41389	0.28819					0.5805	0.00189					19.35	2.13059E-4
0.40432	1.56998					0.5835	0.00189					19.45	2.13033E-4
0.41403	0.48499					0.5865	0.00189					19.55	2.13008E-4
0.40472	1.37042					0.5895	0.00189					19.65	2.12984E-4
0.39243	1.22533					0.5925	0.00189					19.75	2.12961E-4
0.41268	0.49554					0.5955	0.00189					19.85	2.12939E-4
0.40782	7.85698					0.5985	0.00189					19.95	2.12917E-4
0.39673	1.18061
0.41147	0.65144
0.39542	2.32459
0.43487	0.23644
0.39884	0.9276
0.20068	1.007
0.42122	0.82971
0.40338	1.87384
0.419	0.54068
0.4132	2.55751
0.4146	0.99931
0.40653	1.45055
0.41912	0.67081
0.40282	0.43579
0.42081	1.1976
0.40149	1.71696
0.40668	2.88944
0.40579	1.50828
0.41798	0.86845
0.42041	0.53519
0.44577	0.35973
0.14408	3.17531
0.41486	2.77693
0.45842	0.24708
0.42057	1.00333
0.41144	2.33684
0.39728	0.70552
0.45961	0.22613
0.45813	0.28759
0.40735	0.86393
0.39262	0.37727
0.38159	4.04866
0.41148	0.8551
0.42941	0.37105
0.4309	0.24084
0.41562	0.59074
0.40174	0.61852
0.39896	0.28894
0.41609	1.02845
0.39335	1.22129
0.41028	1.59464
0.38723	1.9405
0.41505	0.49249
0.43054	0.33756
0.40035	1.54757
0.40792	0.94033
0.40242	2.05508
0.41144	0.87012
0.3962	4.24017
0.40705	2.95109
0.40134	1.91606
0.41016	0.73409
0.40489	0.47219
0.40282	2.1895
0.39408	0.23588
0.41534	1.00078
0.40098	3.07259
0.40778	1.97437
0.4201	0.70493
0.40117	2.19553
0.41034	1.85165
0.39158	2.83493
0.39293	0.84709
0.37469	0.52646
0.41319	0.22475
0.42714	0.36257
0.40764	0.98626
0.41186	0.59787
0.39398	0.53075
0.40396	0.81181
0.43993	0.23676
0.41295	1.60054
0.39476	1.00015
0.39834	0.56012
0.41125	0.9046
0.4163	0.45319
0.42689	0.6176
0.41858	0.50829
0.4318	0.37438
0.43011	0.72325
0.40466	0.75173
0.44265	0.22444
0.4366	0.21815
0.39275	0.25142
0.40824	0.47106
0.45935	0.20149
0.44489	0.21737
0.40962	0.79986
0.39025	0.32566
0.40484	0.55543
0.41319	0.77966
0.3946	0.44365
0.4031	0.70095
0.41422	0.59657
0.39378	1.4797
0.4282	0.43152
0.3923	1.10796
0.4011	1.7884
0.40956	1.41267
0.44582	0.26096
0.42331	0.9223
0.41542	0.7112
0.39716	0.86491
0.39635	0.47339
0.39804	1.42408
0.41411	1.27632
0.40936	1.7641
0.41272	2.28737
0.41179	0.28881
0.40954	0.40063
0.40995	5.16303
0.40031	1.44046
0.4091	1.48866
0.40072	1.02754
0.39274	0.58807
0.41587	1.0289
0.40908	1.3642
0.42418	0.22482
0.44028	0.55088
0.4111	2.35422
0.45718	0.25528
0.40483	0.96462
0.44161	0.30403
0.4389	0.36353
0.41266	0.39551
0.3853	0.34236
0.409	2.40448
0.39479	2.17579
0.39938	0.93278
0.39893	0.75383
0.40724	0.74127
0.40243	2.44059
0.42312	1.09738
0.40905	0.77006
0.40561	0.60632
0.43109	0.49859
0.40946	1.49919
0.39214	2.21057
0.42139	1.74046
0.4273	0.51538
0.40119	0.90774
0.3982	0.56429
0.42079	0.59059
0.40978	0.71143
0.40733	0.26049
0.40376	2.63967
0.40968	1.22095
0.40365	0.63198
0.43773	0.31145
0.44302	0.29392
0.42774	0.20892
0.39554	0.9079
0.45925	0.31511
0.4065	3.33009
0.40767	2.87352
0.44584	0.2231
0.3976	0.96859
0.44045	0.30935
0.39514	0.35586
0.41457	2.02428
0.40932	3.08792
0.39931	1.13586
0.40607	2.70035
0.4031	0.94411
0.25186	1.43709
0.39654	6.10167
0.38898	1.07032
0.468	2.40247
0.39705	3.08263
0.40687	2.58223
0.40621	1.25113
0.38596	1.81701
0.44247	0.41693
0.39761	0.61709
0.4137	0.78306
0.40232	2.11078
0.42447	0.33975
0.40693	4.91113
0.41866	0.77879
0.40326	0.37936
0.3924	0.56565
0.38785	1.77501
0.38146	2.26713
0.39299	0.86804
0.40534	1.36407
0.44137	0.23533
0.41006	1.43339
0.4378	0.40606
0.41036	0.73851
0.40217	2.49108
0.39869	0.56068
0.40332	1.2289
0.40923	2.14594
0.41466	1.57663
0.41395	0.78093
0.39884	1.57943
0.43207	0.41384
0.42251	0.54035
0.38754	0.421
0.41928	0.54458
0.4085	0.84835
0.44519	0.26772
0.405	2.23436
0.39696	3.17469
0.43031	0.33829
0.38818	0.52051
0.39312	0.71983
0.41181	1.43792
0.40547	1.61178
0.42119	0.37259
0.4002	0.75261
0.40411	1.45929
0.41315	2.70091
0.41458	0.71092
0.42993	0.20892
0.42471	0.87257
0.44083	0.30049
0.4011	0.2211
0.40386	1.20719
0.34079	0.79133
0.39146	2.25931
0.41391	0.99906
0.40546	0.34236
0.41632	0.98777
0.45285	0.2314
0.38996	2.05835
0.39215	2.24753
0.40664	1.25321
0.40336	1.30066
0.38554	0.65159
0.43419	0.44005
0.39763	3.07617
0.40632	1.59578
0.40846	1.15238
0.4132	0.47084
0.40602	1.11008
0.40704	1.15285
0.39746	1.09885
0.40525	2.2506
0.42232	1.54791
0.41005	21.0274
0.39854	0.57615
0.41529	0.2232
0.47269	0.21266
0.40122	0.77426
0.40896	0.55413
0.41115	2.04786
0.43679	0.35287
0.39678	0.36767
0.40367	1.19361
0.4598	0.27031
0.42251	0.53837
0.46213	0.20148
0.43447	1.13357
0.4322	0.49183
0.40071	1.85611
0.40701	0.55934
0.41308	0.8686
0.40101	1.69171
0.40642	1.50582
0.39578	1.11519
0.41395	0.95632
0.40547	3.90321
0.41638	1.05867
0.41998	0.30668
0.40659	0.37493
0.41105	3.03573
0.47826	0.21024
0.41291	0.28863
0.40196	3.90427
0.41152	0.42525
0.40729	1.75152
0.03471	2.32075
0.45604	0.2306
0.40056	2.95663
0.40193	3.02748
0.4046	0.9214
0.40083	0.75758
0.39472	3.05261
0.39722	2.90478
0.39125	2.41655
0.40938	0.75321
0.40012	0.67844
0.41287	1.37986
0.40474	0.63936
0.41006	0.29199
0.42146	0.62307
0.39733	1.25715
0.80311	0.21203
0.42265	0.84073
0.4569	0.24758
0.42172	0.27248
0.39644	6.04276
0.42317	0.40767
0.40997	2.12334
0.4042	0.74342
0.40732	0.54361
0.41832	0.95365
0.41599	3.59905
0.39917	1.90805
0.42031	0.44339
0.40852	0.99019
0.42606	0.53306
0.41522	0.36554
0.40426	2.04102
0.40603	0.66035
0.39669	1.85986
0.41211	2.73315
0.42082	0.70355
0.39926	2.07308
0.40245	1.53322
0.39027	1.58311
0.37472	0.8802
0.40554	0.34313
0.39791	1.36937
0.40262	0.78394
0.42489	0.46655
0.39069	0.8554
0.40083	1.74199
0.42025	0.33489
0.40101	1.2426
0.40571	1.44847
0.41146	1.15148
0.40012	0.45134
0.41018	2.00329
0.39942	0.98447
0.4112	0.42464
0.45905	0.26467
0.41154	0.34231
0.41527	0.30841
0.42839	0.38609
0.39632	1.79627
0.40198	1.02027
0.42735	0.35249
0.39536	1.5024
0.41372	1.39029
0.37657	0.29977
0.39967	1.11445
0.40234	1.27775
0.40654	2.05854
0.40963	1.49257
0.404	2.0861
0.43204	0.83164
0.41356	1.22294
0.40033	2.50175
0.41197	0.34562
0.37134	0.23238
0.40786	0.95289
0.40499	0.25291
0.44941	0.32082
0.40162	2.67261
0.42263	0.35834
0.39252	0.76815
0.45048	0.20047
0.39255	1.4345
0.40284	1.76401
0.40374	0.90159
0.40376	3.17
0.39099	1.14791
0.40419	0.5046
0.41252	0.49574
0.39305	1.37968
0.40752	3.00404
0.39336	1.27472
0.39306	0.82184
0.40034	3.36744
0.41025	0.30263
0.41009	0.29825
0.41525	1.00694
0.40323	0.82113
0.41481	1.23438
0.4041	0.58881
0.40148	1.45839
0.4061	0.62875
0.42124	0.5678
0.41188	1.41473
0.41884	1.31787
0.40773	1.1785
0.4064	1.8224
0.40957	0.51313
0.40112	1.33828
0.42234	0.51938
0.39633	1.18623
0.41493	0.73811
0.39806	1.0229
0.41333	0.38467
0.42135	0.33837
0.40477	1.70932
0.41637	0.60084
0.41989	0.34463
0.40783	1.44107
0.40151	1.96769
0.41499	1.24142
0.45463	0.21543
0.40759	0.9047
0.40455	0.62793
0.39979	2.18326
0.39812	0.63633
0.38321	0.69235
0.42031	0.61461
0.44786	0.29645
0.42784	0.46836
0.4102	0.39748
0.39633	1.37662
0.42851	0.44426
0.40643	1.21951
0.3861	2.92525
0.38962	0.63197
0.40913	2.63886
0.41591	1.17149
0.42342	0.36834
0.40015	0.66641
0.41513	0.61085
0.40127	1.42026
0.40874	1.61187
0.38899	3.30457
0.42098	0.71515
0.4129	1.36267
0.4105	1.61496
0.40735	2.55135
0.40498	0.83068
0.43337	0.24853
0.39746	0.67466
0.40196	0.88485
0.406	0.8288
0.39782	0.82845
0.40695	1.37412
0.45052	0.33488
0.40884	0.77633
0.42521	0.81474
0.39998	1.28797
0.41974	3.92801
0.45289	0.27431
0.41047	0.4189
0.38432	0.384
0.43924	0.28532
0.43889	0.28115
0.39402	3.1039
0.40982	1.71183
0.44374	0.30333
0.41047	0.45125
0.39804	2.09123
0.40667	2.82493
0.4167	0.38627
0.45946	0.3474
0.42795	0.46398
0.4072	1.3194
0.39053	0.31894
0.40133	0.52068
0.40561	2.28507
0.39694	0.80508
0.40564	0.81313
0.39478	3.19692
0.38052	5.60398
0.40014	2.84614
0.41958	1.77947
0.41354	2.8101
0.40795	1.24834
0.38901	2.44055
0.4194	1.484
0.40562	0.88315
0.42731	0.22796
0.40208	2.29035
0.43394	0.32829
0.42922	0.54677
0.39454	1.7661
0.40927	0.42001
0.41135	1.68455
0.40175	0.7558
0.40532	2.26419
0.41301	0.30759
0.38909	2.28407
0.40389	1.41954
0.41652	0.87725
0.41231	0.34168
0.41968	0.25664
0.39394	2.52656
0.43089	0.24409
0.39945	0.79063
0.41878	0.60084
0.42327	1.45561
0.40531	0.77149
0.40878	0.47957
0.39417	2.84659
0.44076	0.28517
0.45863	0.21006
0.45629	0.25401
0.44281	0.26772
0.40732	0.52797
0.39893	2.49946
0.39886	0.57042
0.41281	0.53588
0.40729	0.91169
0.3965	0.78774
0.41939	0.59951
0.40381	4.20026
0.40913	0.46776
0.41788	2.25069
0.38813	3.82264
0.39597	1.91199
0.39739	0.90163
0.42549	0.94032
0.42023	0.47953
0.40587	1.19621
0.39665	0.46682
0.40405	1.27314
0.39819	0.76086
0.40232	1.10509
0.45088	0.27939
0.41655	1.03201
0.40822	0.52861
0.4083	1.13545
0.40072	0.62254
0.4222	0.66589
0.42274	0.88408
0.4302	0.84858
0.40831	0.53963
0.41464	1.35124
0.41201	2.02774
0.40958	0.40347
0.42492	0.42704
0.38083	1.63431
0.40868	0.49511
0.40371	1.57961
0.39595	1.10266
0.4181	0.79239
0.4452	0.21998
0.40457	1.22888
0.40238	0.4675
0.4002	2.49663
0.42351	0.87577
0.39797	3.78326
0.40069	1.25963
0.39699	0.76172
0.39885	1.99087
0.3965	0.98878
0.4379	0.29344
0.41148	2.35665
0.41531	0.93964
0.40204	1.23494
0.40983	0.85065
0.41813	0.43589
0.3884	1.15124
0.40491	0.58069
0.42433	0.66765
0.39391	1.52392
0.42151	0.50034
0.40023	2.23547
0.39167	1.48125
0.40827	2.38802
0.4103	1.09491
0.41458	0.22194
0.40506	1.51924
0.40405	1.23658
0.41238	0.41215
0.40245	1.9278
0.40242	1.97941
0.39132	0.89638
0.40904	0.3712
0.42187	1.0535
0.4207	0.64003
0.46433	0.31716
0.42794	0.38909
0.41782	0.50654
0.40506	0.6117
0.46232	0.27139
0.4049	0.221
0.41782	1.21786
0.4194	0.28354
0.42207	0.23532
0.43033	0.28392
0.40935	1.08611
0.39149	1.70256
0.40631	1.22653
0.40575	0.9077
0.45836	5.92666
0.39463	2.42461
0.40509	1.43689
0.41402	0.96434
0.36959	0.21758
0.40017	1.91796
0.46251	0.2253
0.38163	0.66126
0.41855	0.76033
0.40698	3.21269
0.40805	1.17108
0.41779	1.21851
0.41455	0.4517
0.4194	0.99186
0.41469	1.69098
0.43221	0.36305
0.40682	1.49453
0.4117	0.64801
0.39709	2.64257
0.40063	0.69881
0.41574	0.78353
0.40189	2.39387
0.39748	1.43295
0.39593	0.93076
0.40105	1.41791
0.40449	1.86257
0.39705	2.6209
0.39879	0.63487
0.40113	3.33563
0.42378	0.39149
0.4224	2.22114
0.3834	1.60749
0.44147	0.28311
0.41209	0.5842
0.40282	0.41952
0.41339	1.36681
0.47678	0.27674
0.40408	1.52861
0.41993	0.76475
0.41684	0.58596
0.40298	2.29903
0.39345	0.95334
0.41988	0.53861
0.3992	0.36048
0.40945	2.74091
0.41626	0.46862
0.40998	1.35765
0.44207	0.41877
0.40204	3.26134
0.41301	0.77376
0.40687	1.2988
0.40155	1.28111
0.39271	1.71709
0.39167	1.87934
0.39558	0.76646
0.39966	0.50803
0.41452	0.57467
0.39259	1.50229
0.42016	0.62455
0.40607	1.65259
0.39795	0.59122
0.40719	0.35723
0.40757	0.49094
0.39056	0.55854
0.41382	0.29925
0.45097	0.27863
0.41037	0.77914
0.41941	1.81479
0.39448	0.45985
0.41242	1.02649
0.39941	0.50324
0.42911	0.20674
0.39305	2.19208
0.40911	2.02416
0.4078	0.56297
0.39968	1.92786
0.41497	0.56925
0.39865	1.02264
0.42826	0.42046
0.42835	0.29997
0.39407	3.55671
0.4039	0.79799
0.42755	0.59302
0.41474	0.84851
0.40992	0.36251
0.41951	1.41565
0.39018	0.5896
0.41464	0.66661
0.40133	1.29891
0.40864	1.91701
0.40753	1.51209
0.43118	0.40587
0.41555	0.50032
0.42482	0.34236
0.40208	0.60514
0.39466	0.36012
0.41458	0.37995
0.40236	1.44402
0.41116	1.81217
0.45794	0.37024
0.39624	1.35329
0.40792	0.98687
0.40023	2.19424
0.42054	0.31951
0.40483	1.98995
0.40505	1.24445
0.3914	1.29261
0.42291	0.3835
0.40706	0.36703
0.39465	2.88017
0.39968	2.03969
0.39767	1.60046
0.41058	0.63232
0.42946	0.94381
0.41746	0.6678
0.40414	2.17637
0.42953	0.35435
0.40765	1.32007
0.40673	0.89778
0.4062	0.66823
0.42768	0.29515
0.41412	0.48361
0.39901	0.83326
0.41265	0.97536
0.4052	1.5007
0.40829	0.51693
0.40901	0.92042
0.40669	0.68071
0.39206	1.33063
0.40041	2.62735
0.42621	0.3809
0.40454	0.82332
0.41554	0.22448
0.41303	0.72213
0.40721	0.27068
0.41041	0.86018
0.39716	1.65491
0.41791	0.22511
0.41102	0.91695
0.39944	1.42234
0.39453	1.60456
0.41884	0.38118
0.41093	0.55798
0.38252	1.71657
0.39794	3.27626
0.39614	1.81915
0.40176	1.60227
0.38327	4.4659
0.39299	1.78232
0.41474	1.13257
0.39956	1.15193
0.41327	0.71388
0.40926	1.25565
0.39369	2.1945
0.40325	1.69771
0.42293	0.33664
0.41365	0.9817
0.40745	0.65427
0.40973	0.80043
0.40284	0.39106
0.41832	1.25659
0.39433	4.56006
0.40148	1.52833
0.38482	0.38
0.39678	1.42693
0.42488	0.81849
0.41932	0.42637
0.42012	0.94985
0.43227	0.54071
0.39745	0.82394
0.40281	0.95482
0.41167	0.56291
0.39431	3.89531
0.30612	6.35632
0.39917	1.17253
0.41465	0.28336
0.40078	1.58675
0.39679	1.40568
0.40864	0.69908
0.41509	2.69094
0.39882	1.03098
0.40475	0.43598
0.41896	0.26742
0.39352	0.91488
0.39578	1.00629
0.4099	0.61159
0.40537	0.92838
0.41627	0.29253
0.44821	0.23384
0.40185	0.22798
0.43168	0.32795
0.39673	4.98298
0.43233	0.3183
0.33297	5.15714
0.40217	0.72762
0.30212	0.27978
0.40567	0.5204
0.41762	0.70352
0.39761	1.71099
0.39514	0.69729
0.40475	0.77704
0.46484	0.23799
0.38999	0.38736
0.40579	1.56703
0.41369	0.22751
0.43162	0.40121
0.42862	0.40851
0.40907	1.29332
0.40092	2.49687
0.424	0.32276
0.41134	0.68272
0.41383	0.4084
0.3994	1.2633
0.42	0.65206
0.38004	0.22777
0.38908	1.1167
0.46739	0.23533
0.408	0.88073
0.44153	0.2139
0.39993	1.41603
0.39544	2.23141
0.45139	0.24245
0.4291	1.28079
0.4259	0.71308
0.4528	0.23055
0.41004	0.50598
0.4066	1.27133
0.4156	0.51035
0.39009	0.80881
0.40003	1.30121
0.38675	0.65448
0.40837	1.34142
0.41055	1.71952
0.40838	4.85547
0.4031	1.2097
0.40879	0.90884
0.40974	1.23406
0.40445	1.44773
0.40146	2.39307
0.40521	1.12405
0.39571	1.03503
0.39089	1.8525
0.40271	0.89233
0.39552	0.92518
0.40686	0.86776
0.39257	3.07916
0.39334	1.24378
0.47347	0.22951
0.4185	0.39914
0.41388	0.87626
0.40291	0.65253
0.41814	0.66229
0.44082	0.24361
0.41763	0.29235
0.41348	0.37446
0.43897	0.22411
0.40456	2.6085
0.41501	1.60182
0.39231	1.03159
0.40349	1.06734
0.40142	1.24126
0.42026	0.51419
0.43345	1.08488
0.42667	0.32506
0.40172	1.87082
0.40684	1.21404
0.40164	0.47864
0.40328	0.50029
0.40168	0.65665
0.44956	1.2899
0.41753	0.32265
0.38345	2.05141
0.4199	0.22433
0.41053	0.787
0.40185	0.33253
0.41137	0.42619
0.41027	0.40529
0.39555	1.37277
0.43267	0.21595
0.40269	0.48379
0.44409	0.23514
0.42982	0.51932
0.40447	3.08992
0.40633	0.69473
0.41042	2.3693
0.4473	1.88667
0.41505	0.60323
0.40404	2.60772
0.4089	0.33924
0.44081	1.20342
0.41457	0.74656
0.4093	0.31615
0.41504	0.38335
0.39929	1.46257
0.39397	1.56998
0.44038	0.25636
0.39534	3.58377
0.36464	0.80212
0.44037	0.31523
0.40145	0.69573
0.40827	0.39622
0.40365	2.99832
0.42106	0.31175
0.41085	0.4065
0.43817	0.42109
0.4096	0.80902
0.39734	2.47291
0.41658	0.39972
0.39784	1.69005
0.40535	0.78339
0.40496	1.81618
0.41013	1.10822
0.3894	2.20179
0.3963	0.98004
0.43554	0.32494
0.40516	1.18138
0.39659	0.86598
0.39228	0.77921
0.40575	1.039
0.40749	3.45115
0.41336	0.46691
0.40182	2.47682
0.41638	0.52704
0.41128	0.50394
0.41645	0.54081
0.38414	1.02203
0.40015	2.46664
0.40815	0.70786
0.49784	0.22037
0.41104	1.23578
0.41611	0.57172
0.39116	1.32462
0.39864	1.45701
0.42127	0.57671
0.42912	0.84
0.40765	0.27271
0.4114	0.48372
0.39347	2.75304
0.40031	2.6282
0.4396	0.29253
0.40006	1.79904
0.40804	1.09657
0.42923	0.222
0.42697	0.40071
0.43844	0.6842
0.40799	0.71497
0.39548	0.25921
0.4019	0.95142
0.44076	0.20679
0.41492	1.10742
0.41882	0.53981
0.42862	0.46397
0.3997	2.10074
0.40746	0.91001
0.39492	1.01023
0.41226	0.22801
0.42601	0.54878
0.4332	0.76302
0.41683	0.38757
0.40711	0.5527
0.39846	0.84097
0.38142	0.61096
0.41311	3.0229
0.4445	0.21409
0.39717	0.71951
0.39366	3.07259
0.41721	0.9589
0.40967	1.34596
0.3995	0.49419
0.39632	2.31389
0.40569	1.13027
0.42576	0.30623
0.41596	0.82633
0.40331	0.94455
0.40566	2.77645
0.4124	0.76434
0.41793	0.8303
0.39738	0.95591
0.3992	2.07288
0.3979	1.64355
0.41163	0.83148
0.41061	1.82434
0.40428	2.7531
0.40868	0.70659
0.39916	5.00351
0.39659	0.48283
0.40101	1.27811
0.41456	1.14529
0.39846	1.20627
0.40414	1.87523
0.39796	1.24092
0.40452	1.17494
0.4076	1.73784
0.4119	1.14483
0.40208	0.78918
0.4055	1.01447
0.38175	1.19982
0.39162	3.90711
0.4081	1.24427
0.43046	0.30391
0.40031	1.03987
0.39373	1.1
0.39869	1.206
0.40432	4.20421
0.3915	1.8432
0.4052	0.38411
0.40106	0.52557
0.39714	2.8303
0.40591	0.23735
0.42391	0.39307
0.43232	0.27238
0.40742	0.79723
0.40331	2.52091
0.41059	1.19627
0.42537	0.35261
0.39896	3.33893
0.43366	0.37932
0.42893	0.49462
0.40081	3.61213
0.41962	0.72984
0.45264	0.22661
0.40007	2.4683
0.42284	0.41131
[truncated: 46,816 more rows]

## Sheet: Fig. 5g
H31-10R2(Me2s)K9(Me3) Scatter			BlockDepth histogram			Gaussian-fitting for BlockDepth			Restime histogram			LogNormal-fitting for Restime
BlockDepth	Restime (ms)		BlockDepth	Relative counts		BlockDepth	Relative counts		Restime (ms)	Relative counts		Restime (ms)	Relative counts
0.39742	0.92133		0.3015	0		0.3015	9.15262E-4		0.05	0		0.05	0.00371
0.44232	5.85951		0.3045	0		0.30209	9.15262E-4		0.15	0		0.07993	0.00856
0.43984	3.94513		0.3075	1.75331E-4		0.30239	9.15262E-4		0.25	0.0464		0.10986	0.01347
0.45145	3.2046		0.3105	0		0.30269	9.15262E-4		0.35	0.04204		0.13979	0.01793
0.45421	0.41736		0.3135	0		0.30299	9.15262E-4		0.45	0.03935		0.15	0.01932
0.435	5.05317		0.3165	8.76655E-5		0.30328	9.15262E-4		0.55	0.03726		0.16972	0.02181
0.4501	0.56425		0.3195	8.76655E-5		0.30358	9.15262E-4		0.65	0.03569		0.19965	0.02511
0.44223	4.60819		0.3225	8.76655E-5		0.30388	9.15262E-4		0.75	0.03125		0.22958	0.02786
0.44122	1.22209		0.3255	8.76655E-5		0.30418	9.15262E-4		0.85	0.03195		0.25	0.02945
0.44412	3.4912		0.3285	0		0.30447	9.15262E-4		0.95	0.03073		0.25951	0.03012
0.43889	2.48335		0.3315	8.76655E-5		0.3045	9.15262E-4		1.05	0.02672		0.28944	0.03197
0.34735	7.12483		0.3345	8.76655E-5		0.30477	9.15262E-4		1.15	0.02838		0.31937	0.03346
0.43649	1.48819		0.3375	8.76655E-5		0.30507	9.15262E-4		1.25	0.02794		0.3493	0.03465
0.4418	8.21444		0.3405	0		0.30536	9.15262E-4		1.35	0.02481		0.35	0.03467
0.43475	2.56179		0.3435	8.76655E-5		0.30566	9.15262E-4		1.45	0.02629		0.37923	0.03557
0.44081	0.94477		0.3465	1.75331E-4		0.30596	9.15262E-4		1.55	0.02333		0.40916	0.03627
0.43916	2.12355		0.3495	8.76655E-5		0.30626	9.15262E-4		1.65	0.02437		0.43909	0.03678
0.44175	10.4		0.3525	2.62996E-4		0.30655	9.15262E-4		1.75	0.02324		0.45	0.03692
0.44542	0.52407		0.3555	2.62996E-4		0.30685	9.15262E-4		1.85	0.01889		0.46902	0.03713
0.43783	9.42007		0.3585	8.76655E-5		0.30715	9.15262E-4		1.95	0.01793		0.49895	0.03734
0.4253	4.95951		0.3615	6.13658E-4		0.30745	9.15262E-4		2.05	0.01845		0.52888	0.03744
0.44645	1.00552		0.3645	2.62996E-4		0.3075	9.15262E-4		2.15	0.01663		0.55	0.03745
0.44821	2.19227		0.3675	3.50662E-4		0.30774	9.15262E-4		2.25	0.01941		0.55881	0.03744
0.45974	0.85555		0.3705	2.62996E-4		0.30804	9.15262E-4		2.35	0.01541		0.58874	0.03736
0.44591	3.79166		0.3735	2.62996E-4		0.30834	9.15262E-4		2.45	0.01706		0.61867	0.0372
0.43598	3.53603		0.3765	1.75331E-4		0.30864	9.15262E-4		2.55	0.01436		0.6486	0.03699
0.45073	2.89087		0.3795	3.50662E-4		0.30893	9.15262E-4		2.65	0.01401		0.65	0.03698
0.44689	1.33919		0.3825	5.25993E-4		0.30923	9.15262E-4		2.75	0.01384		0.67853	0.03673
0.46369	0.38464		0.3855	6.13658E-4		0.30953	9.15262E-4		2.85	0.01193		0.70846	0.03642
0.43342	0.8881		0.3885	4.38327E-4		0.30982	9.15262E-4		2.95	0.01506		0.73839	0.03608
0.42779	1.02041		0.3915	0.00105		0.31012	9.15262E-4		3.05	0.01236		0.75	0.03594
0.4639	0.60909		0.3945	0.00131		0.31042	9.15262E-4		3.15	0.01123		0.76832	0.03571
0.45281	2.44895		0.3975	0.00105		0.3105	9.15262E-4		3.25	0.00923		0.79825	0.03532
0.43659	4.60539		0.4005	0.00114		0.31072	9.15262E-4		3.35	0.01341		0.82818	0.0349
0.41627	5.09537		0.4035	9.6432E-4		0.31101	9.15262E-4		3.45	0.01088		0.85	0.03459
0.46429	0.53967		0.4065	9.6432E-4		0.31131	9.15262E-4		3.55	0.00836		0.85811	0.03447
0.43206	3.63947		0.4095	0.00184		0.31161	9.15262E-4		3.65	0.00897		0.88804	0.03403
0.44914	0.48188		0.4125	0.00184		0.31191	9.15262E-4		3.75	0.01071		0.91797	0.03358
0.43474	7.63571		0.4155	0.00193		0.3122	9.15262E-4		3.85	0.00827		0.9479	0.03312
0.45272	0.53206		0.4185	0.00281		0.3125	9.15262E-4		3.95	0.00757		0.95	0.03308
0.43687	3.4417		0.4215	0.00438		0.3128	9.15262E-4		4.05	0.00914		0.97783	0.03265
0.42799	1.84696		0.4245	0.00666		0.31309	9.15262E-4		4.15	0.00818		1.00776	0.03218
0.43958	1.86264		0.4275	0.01201		0.31339	9.15262E-4		4.25	0.00818		1.03769	0.03171
0.44061	0.657		0.4305	0.02227		0.3135	9.15262E-4		4.35	0.00818		1.05	0.03152
0.43455	2.93826		0.4335	0.03901		0.31369	9.15262E-4		4.45	0.00583		1.06762	0.03124
0.45516	0.88747		0.4365	0.06768		0.31399	9.15262E-4		4.55	0.00609		1.09755	0.03077
0.46094	0.4892		0.4395	0.09354		0.31428	9.15262E-4		4.65	0.0081		1.12748	0.0303
0.45297	1.20146		0.4425	0.11169		0.31458	9.15262E-4		4.75	0.00679		1.15	0.02995
0.43048	1.37941		0.4455	0.12405		0.31488	9.15262E-4		4.85	0.00627		1.15741	0.02984
0.38359	1.34275		0.4485	0.11204		0.31518	9.15262E-4		4.95	0.00514		1.18734	0.02937
0.44884	5.56883		0.4515	0.09722		0.31547	9.15262E-4		5.05	0.00566		1.21727	0.02891
0.43919	1.7692		0.4545	0.0796		0.31577	9.15262E-4		5.15	0.0054		1.2472	0.02846
0.45681	0.30815		0.4575	0.05584		0.31607	9.15262E-4		5.25	0.00487		1.25	0.02842
0.43579	0.70623		0.4605	0.03857		0.31636	9.15262E-4		5.35	0.00444		1.27713	0.02801
0.50997	0.21128		0.4635	0.02639		0.3165	9.15262E-4		5.45	0.00392		1.30706	0.02757
0.43845	2.23163		0.4665	0.02016		0.31666	9.15262E-4		5.55	0.0054		1.33699	0.02713
0.44556	0.95098		0.4695	0.01534		0.31696	9.15262E-4		5.65	0.00461		1.35	0.02694
0.44103	5.82756		0.4725	0.01078		0.31726	9.15262E-4		5.75	0.00366		1.36692	0.02669
0.47086	0.31474		0.4755	0.00833		0.31755	9.15262E-4		5.85	0.00461		1.39685	0.02627
0.44792	3.05906		0.4785	0.00596		0.31785	9.15262E-4		5.95	0.00435		1.42678	0.02585
0.44952	0.7987		0.4815	0.00421		0.31815	9.15262E-4		6.05	0.00348		1.45	0.02552
0.43826	3.84931		0.4845	0.00386		0.31845	9.15262E-4		6.15	0.00366		1.45671	0.02543
0.43916	2.51539		0.4875	0.00438		0.31874	9.15262E-4		6.25	0.00383		1.48664	0.02502
0.45837	0.68238		0.4905	0.00342		0.31904	9.15262E-4		6.35	0.00305		1.51657	0.02462
0.43261	0.38911		0.4935	0.00237		0.31934	9.15262E-4		6.45	0.00209		1.5465	0.02423
0.5076	1.4208		0.4965	0.00158		0.3195	9.15262E-4		6.55	0.00313		1.55	0.02418
0.40841	0.32925		0.4995	0.00114		0.31964	9.15262E-4		6.65	0.00296		1.57643	0.02384
0.4508	3.8601		0.5025	0.0014		0.31993	9.15262E-4		6.75	0.00192		1.60636	0.02346
0.45096	3.48919		0.5055	0.00114		0.32023	9.15262E-4		6.85	0.00261		1.63629	0.02308
0.45719	1.24075		0.5085	9.6432E-4		0.32053	9.15262E-4		6.95	0.00235		1.65	0.02291
0.41227	0.33265		0.5115	1.75331E-4		0.32082	9.15262E-4		7.05	0.00339		1.66622	0.02271
0.44049	4.37678		0.5145	6.13658E-4		0.32112	9.15262E-4		7.15	0.00261		1.69615	0.02235
0.43492	2.19702		0.5175	8.76655E-5		0.32142	9.15262E-4		7.25	0.00252		1.72608	0.022
0.43809	0.99356		0.5205	8.76655E-5		0.32172	9.15262E-4		7.35	0.00244		1.75	0.02172
0.42652	3.33245		0.5235	3.50662E-4		0.32201	9.15262E-4		7.45	0.00209		1.75601	0.02165
0.44683	0.53877		0.5265	2.62996E-4		0.32231	9.15262E-4		7.55	0.00209		1.78594	0.0213
0.43796	6.21502		0.5295	4.38327E-4		0.3225	9.15262E-4		7.65	0.00157		1.81587	0.02097
0.36903	2.22379		0.5325	0		0.32261	9.15262E-4		7.75	0.00174		1.8458	0.02064
0.43615	9.32709		0.5355	8.76655E-5		0.32291	9.15262E-4		7.85	0.00148		1.85	0.02059
0.44487	2.89106		0.5385	0		0.3232	9.15262E-4		7.95	0.00122		1.87573	0.02031
0.43538	4.25505		0.5415	8.76655E-5		0.3235	9.15262E-4		8.05	0.00104		1.90566	0.01999
0.43782	3.45194		0.5445	2.62996E-4		0.3238	9.15262E-4		8.15	0.00157		1.93559	0.01968
0.43411	9.16082		0.5475	1.75331E-4		0.32409	9.15262E-4		8.25	0.00157		1.95	0.01953
0.46437	0.38629		0.5505	8.76655E-5		0.32439	9.15262E-4		8.35	0.00148		1.96552	0.01937
0.4242	2.01177		0.5535	1.75331E-4		0.32469	9.15262E-4		8.45	0.00122		1.99545	0.01907
0.45348	0.92097		0.5565	0		0.32499	9.15262E-4		8.55	0.00122		2.02538	0.01878
0.40741	6.73913		0.5595	0		0.32528	9.15262E-4		8.65	0.00113		2.05	0.01854
0.43021	5.8121		0.5625	8.76655E-5		0.3255	9.15262E-4		8.75	0.00131		2.05531	0.01849
0.43553	5.46753		0.5655	8.76655E-5		0.32558	9.15262E-4		8.85	7.83426E-4		2.08524	0.0182
0.43358	0.50051		0.5685	0		0.32588	9.15262E-4		8.95	0.00148		2.11517	0.01793
0.43214	0.38404		0.5715	8.76655E-5		0.32618	9.15262E-4		9.05	6.96379E-4		2.1451	0.01765
0.451	0.79637		0.5745	0		0.32647	9.15262E-4		9.15	0.00174		2.15	0.01761
0.4442	5.12795		0.5775	8.76655E-5		0.32677	9.15262E-4		9.25	4.35237E-4		2.17503	0.01738
0.43901	4.11205		0.5805	0		0.32707	9.15262E-4		9.35	0.00122		2.20495	0.01712
0.43844	1.60324		0.5835	0		0.32736	9.15262E-4		9.45	4.35237E-4		2.23488	0.01686
0.43704	4.11217		0.5865	1.75331E-4		0.32766	9.15262E-4		9.55	6.96379E-4		2.25	0.01673
0.4229	7.35224		0.5895	8.76655E-5		0.32796	9.15262E-4		9.65	8.70474E-5		2.26481	0.01661
0.4473	4.38062		0.5925	0		0.32826	9.15262E-4		9.75	0.00113		2.29474	0.01636
0.44345	7.1358		0.5955	0		0.3285	9.15262E-4		9.85	8.70474E-4		2.32467	0.01611
0.46618	0.31517		0.5985	0		0.32855	9.15262E-4		9.95	5.22284E-4		2.35	0.01591
0.44837	6.50894					0.32885	9.15262E-4		10.05	8.70474E-4		2.3546	0.01587
0.45512	0.39156					0.32915	9.15262E-4		10.15	0.00113		2.38453	0.01564
0.44485	1.58252					0.32945	9.15262E-4		10.25	5.22284E-4		2.41446	0.01541
0.4609	0.61524					0.32974	9.15262E-4		10.35	4.35237E-4		2.44439	0.01518
0.46848	0.47074					0.33004	9.15262E-4		10.45	7.83426E-4		2.45	0.01514
0.44754	2.63448					0.33034	9.15262E-4		10.55	6.09331E-4		2.47432	0.01496
0.44884	1.1948					0.33064	9.15262E-4		10.65	3.48189E-4		2.50425	0.01474
0.47395	0.27067					0.33093	9.15262E-4		10.75	8.70474E-5		2.53418	0.01452
0.44994	1.25213					0.33123	9.15262E-4		10.85	4.35237E-4		2.55	0.01441
0.44758	1.25201					0.3315	9.15262E-4		10.95	3.48189E-4		2.56411	0.01431
0.44395	1.63521					0.33153	9.15262E-4		11.05	1.74095E-4		2.59404	0.01411
0.433	4.8323					0.33182	9.15262E-4		11.15	1.74095E-4		2.62397	0.0139
0.4393	3.6655					0.33212	9.15262E-4		11.25	3.48189E-4		2.65	0.01373
0.43546	0.81192					0.33242	9.15262E-4		11.35	1.74095E-4		2.6539	0.01371
0.41594	0.44438					0.33272	9.15262E-4		11.45	5.22284E-4		2.68383	0.01351
0.43456	7.2264					0.33301	9.15262E-4		11.55	3.48189E-4		2.71376	0.01332
0.45792	1.95806					0.33331	9.15262E-4		11.65	1.74095E-4		2.74369	0.01313
0.44632	1.09548					0.33361	9.15262E-4		11.75	6.09331E-4		2.75	0.01309
0.43739	2.60381					0.33391	9.15262E-4		11.85	4.35237E-4		2.77362	0.01294
0.45383	0.35262					0.3342	9.15262E-4		11.95	1.74095E-4		2.80355	0.01276
0.44212	4.09705					0.3345	9.15262E-4		12.05	3.48189E-4		2.83348	0.01258
0.44038	6.25137					0.3348	9.15262E-4		12.15	1.74095E-4		2.85	0.01249
0.45059	3.01849					0.33509	9.15262E-4		12.25	3.48189E-4		2.86341	0.01241
0.4446	0.69647					0.33539	9.15262E-4		12.35	2.61142E-4		2.89334	0.01224
0.45396	0.30609					0.33569	9.15262E-4		12.45	3.48189E-4		2.92327	0.01207
0.46225	2.94479					0.33599	9.15262E-4		12.55	5.22284E-4		2.95	0.01192
0.42987	2.74794					0.33628	9.15262E-4		12.65	3.48189E-4		2.9532	0.0119
0.42693	0.39078					0.33658	9.15262E-4		12.75	1.74095E-4		2.98313	0.01174
0.43942	5.23972					0.33688	9.15262E-4		12.85	0		3.01306	0.01158
0.45099	0.56304					0.33718	9.15262E-4		12.95	1.74095E-4		3.04299	0.01142
0.44528	0.57645					0.33747	9.15262E-4		13.05	3.48189E-4		3.05	0.01138
0.43731	1.34985					0.3375	9.15262E-4		13.15	2.61142E-4		3.07292	0.01126
0.45061	2.25289					0.33777	9.15262E-4		13.25	1.74095E-4		3.10285	0.01111
0.42696	2.01943					0.33807	9.15262E-4		13.35	3.48189E-4		3.13278	0.01096
0.43639	0.51921					0.33836	9.15262E-4		13.45	8.70474E-5		3.15	0.01088
0.43859	1.45166					0.33866	9.15262E-4		13.55	1.74095E-4		3.16271	0.01081
0.43875	3.90943					0.33896	9.15262E-4		13.65	1.74095E-4		3.19264	0.01067
0.47004	0.28811					0.33926	9.15262E-4		13.75	8.70474E-5		3.22257	0.01053
0.44346	1.36485					0.33955	9.15262E-4		13.85	1.74095E-4		3.25	0.0104
0.46623	0.26884					0.33985	9.15262E-4		13.95	0		3.2525	0.01039
0.43914	2.22098					0.34015	9.15262E-4		14.05	0		3.28243	0.01025
0.45491	0.54248					0.34045	9.15262E-4		14.15	3.48189E-4		3.31236	0.01011
0.43623	1.72344					0.3405	9.15262E-4		14.25	0		3.34229	0.00998
0.43662	1.01467					0.34074	9.15262E-4		14.35	8.70474E-5		3.35	0.00995
0.46137	0.63272					0.34104	9.15262E-4		14.45	0		3.37222	0.00985
0.4449	1.40387					0.34134	9.15262E-4		14.55	2.61142E-4		3.40215	0.00972
0.4585	0.52345					0.34164	9.15262E-4		14.65	8.70474E-5		3.43208	0.0096
0.43707	3.12036					0.34193	9.15262E-4		14.75	1.74095E-4		3.45	0.00952
0.78995	0.21514					0.34223	9.15262E-4		14.85	0		3.46201	0.00947
0.4435	7.07517					0.34253	9.15262E-4		14.95	0		3.49194	0.00935
0.42622	1.9049					0.34282	9.15262E-4		15.05	2.61142E-4		3.52187	0.00923
0.32395	0.482					0.34312	9.15262E-4		15.15	8.70474E-5		3.55	0.00912
0.48522	0.21575					0.34342	9.15262E-4		15.25	0		3.5518	0.00911
0.43951	4.201					0.3435	9.15262E-4		15.35	8.70474E-5		3.58173	0.009
0.46124	0.27835					0.34372	9.15262E-4		15.45	1.74095E-4		3.61166	0.00888
0.43896	1.78457					0.34401	9.15262E-4		15.55	0		3.64159	0.00877
0.44935	0.67803					0.34431	9.15262E-4		15.65	0		3.65	0.00874
0.43171	1.8589					0.34461	9.15262E-4		15.75	0		3.67152	0.00866
0.46209	2.09627					0.34491	9.15262E-4		15.85	0		3.70145	0.00855
0.43558	4.73765					0.3452	9.15262E-4		15.95	0		3.73138	0.00844
0.4527	0.37564					0.3455	9.15262E-4		16.05	1.74095E-4		3.75	0.00838
0.44402	1.74192					0.3458	9.15262E-4		16.15	0		3.76131	0.00834
0.43674	16.5194					0.34609	9.15262E-4		16.25	0		3.79124	0.00823
0.41008	0.90526					0.34639	9.15262E-4		16.35	8.70474E-5		3.82117	0.00813
0.44216	2.36467					0.3465	9.15262E-4		16.45	8.70474E-5		3.85	0.00803
0.43879	1.52522					0.34669	9.15262E-4		16.55	8.70474E-5		3.8511	0.00803
0.45745	0.59033					0.34699	9.15262E-4		16.65	0		3.88103	0.00793
0.43549	1.26968					0.34728	9.15262E-4		16.75	0		3.91096	0.00783
0.43734	0.93324					0.34758	9.15262E-4		16.85	0		3.94089	0.00774
0.45706	1.51007					0.34788	9.15262E-4		16.95	0		3.95	0.00771
0.43326	3.50331					0.34818	9.15262E-4		17.05	0		3.97082	0.00764
0.44007	0.87599					0.34847	9.15262E-4		17.15	0		4.00075	0.00755
0.45645	0.65179					0.34877	9.15262E-4		17.25	0		4.03068	0.00746
0.4573	0.50373					0.34907	9.15262E-4		17.35	8.70474E-5		4.05	0.0074
0.505	6.35065					0.34936	9.15262E-4		17.45	0		4.06061	0.00737
0.44902	1.02859					0.3495	9.15262E-4		17.55	8.70474E-5		4.09054	0.00728
0.44065	3.39031					0.34966	9.15262E-4		17.65	0		4.12047	0.00719
0.45197	2.92061					0.34996	9.15262E-4		17.75	0		4.15	0.00711
0.43804	1.50387					0.35026	9.15262E-4		17.85	1.74095E-4		4.1504	0.00711
0.44447	4.37949					0.35055	9.15262E-4		17.95	0		4.18033	0.00702
0.44368	4.56738					0.35085	9.15262E-4		18.05	0		4.21026	0.00694
0.43772	2.76734					0.35115	9.15262E-4		18.15	8.70474E-5		4.24019	0.00686
0.44437	0.90189					0.35145	9.15262E-4		18.25	8.70474E-5		4.25	0.00683
0.43398	9.02756					0.35174	9.15262E-4		18.35	0		4.27012	0.00677
0.43938	3.78474					0.35204	9.15262E-4		18.45	8.70474E-5		4.30005	0.00669
0.43844	1.42415					0.35234	9.15262E-4		18.55	8.70474E-5		4.32998	0.00662
0.45749	0.43732					0.3525	9.15262E-4		18.65	0		4.35	0.00656
0.4528	0.77593					0.35264	9.15262E-4		18.75	0		4.35991	0.00654
0.46479	0.33664					0.35293	9.15262E-4		18.85	0		4.38984	0.00646
0.44046	0.73713					0.35323	9.15262E-4		18.95	0		4.41977	0.00639
0.43929	2.58985					0.35353	9.15262E-4		19.05	0		4.4497	0.00631
0.43991	26.3503					0.35382	9.15262E-4		19.15	0		4.45	0.00631
0.46208	0.62328					0.35412	9.15262E-4		19.25	8.70474E-5		4.47963	0.00624
0.45066	0.58908					0.35442	9.15262E-4		19.35	0		4.50956	0.00617
0.43889	0.6485					0.35472	9.15262E-4		19.45	0		4.53949	0.0061
0.45064	0.38841					0.35501	9.15262E-4		19.55	1.74095E-4		4.55	0.00607
0.43292	10.5517					0.35531	9.15262E-4		19.65	0		4.56942	0.00603
0.44039	1.8467					0.3555	9.15262E-4		19.75	0		4.59935	0.00596
0.41758	0.66046					0.35561	9.15262E-4		19.85	0		4.62928	0.00589
0.42561	1.13566					0.35591	9.15262E-4		19.95	0		4.65	0.00584
0.44309	4.83677					0.3562	9.15262E-4		20.05	0		4.65921	0.00582
0.3691	3.32784					0.3565	9.15262E-4		20.15	0		4.68914	0.00576
0.44363	6.60414					0.3568	9.15262E-4		20.25	0		4.71907	0.00569
0.43883	5.07221					0.35709	9.15262E-4		20.35	0		4.749	0.00563
0.44218	5.10243					0.35739	9.15262E-4		20.45	8.70474E-5		4.75	0.00563
0.43601	6.40208					0.35769	9.15262E-4		20.55	0		4.77893	0.00557
0.41637	1.17522					0.35799	9.15262E-4		20.65	0		4.80886	0.0055
0.43885	1.95909					0.35828	9.15262E-4		20.75	8.70474E-5		4.83879	0.00544
0.44823	1.56276					0.3585	9.15262E-4		20.85	0		4.85	0.00542
0.4434	1.67893					0.35858	9.15262E-4		20.95	0		4.86872	0.00538
0.44865	1.73641					0.35888	9.15262E-4		21.05	0		4.89865	0.00532
0.4424	9.10657					0.35918	9.15262E-4		21.15	0		4.92858	0.00526
0.44912	2.0553					0.35947	9.15262E-4		21.25	0		4.95	0.00522
0.4224	8.43809					0.35977	9.15262E-4		21.35	0		4.95851	0.0052
0.46506	0.36473					0.36007	9.15262E-4		21.45	0		4.98844	0.00515
0.44509	4.3475					0.36036	9.15262E-4		21.55	0		5.01837	0.00509
0.43333	4.96432					0.36066	9.15262E-4		21.65	0		5.0483	0.00503
0.45449	0.34571					0.36096	9.15262E-4		21.75	0		5.05	0.00503
0.44182	0.96271					0.36126	9.15262E-4		21.85	0		5.07823	0.00498
0.44249	2.7993					0.3615	9.15262E-4		21.95	0		5.10816	0.00493
0.41625	1.55788					0.36155	9.15262E-4		22.05	0		5.13809	0.00487
0.44114	1.83255					0.36185	9.15262E-4		22.15	0		5.15	0.00485
0.43636	7.96512					0.36215	9.15262E-4		22.25	0		5.16802	0.00482
0.44365	1.42868					0.36245	9.15262E-4		22.35	0		5.19795	0.00477
0.42764	1.00519					0.36274	9.15262E-4		22.45	0		5.22788	0.00472
0.43936	2.27187					0.36304	9.15262E-4		22.55	0		5.25	0.00468
0.44602	0.76026					0.36334	9.15262E-4		22.65	0		5.25781	0.00466
0.43809	8.27569					0.36364	9.15262E-4		22.75	0		5.28774	0.00461
0.4294	2.72519					0.36393	9.15262E-4		22.85	0		5.31767	0.00457
0.44173	4.50842					0.36423	9.15262E-4		22.95	0		5.3476	0.00452
0.42697	5.59107					0.3645	9.15262E-4		23.05	0		5.35	0.00451
0.44049	1.43533					0.36453	9.15262E-4		23.15	0		5.37753	0.00447
0.39314	0.4591					0.36482	9.15262E-4		23.25	0		5.40746	0.00442
0.43044	4.20815					0.36512	9.15262E-4		23.35	0		5.43739	0.00437
0.09893	2.33534					0.36542	9.15262E-4		23.45	0		5.45	0.00435
0.42589	1.3329					0.36572	9.15262E-4		23.55	0		5.46732	0.00433
0.4395	1.48768					0.36601	9.15262E-4		23.65	8.70474E-5		5.49725	0.00428
0.43712	5.07355					0.36631	9.15262E-4		23.75	0		5.52718	0.00424
0.44133	0.63172					0.36661	9.15262E-4		23.85	0		5.55	0.0042
0.4517	1.88024					0.36691	9.15262E-4		23.95	0		5.55711	0.00419
0.44734	1.48506					0.3672	9.15262E-4		24.05	0		5.58704	0.00415
0.45029	3.98037					0.3675	9.15262E-4		24.15	0		5.61697	0.00411
0.43514	3.79283					0.3678	9.15262E-4		24.25	0		5.6469	0.00406
0.43291	1.40275					0.36809	9.15262E-4		24.35	0		5.65	0.00406
0.44317	5.9144					0.36839	9.15262E-4		24.45	0		5.67683	0.00402
0.44824	0.7324					0.36869	9.15262E-4		24.55	0		5.70676	0.00398
0.46679	0.57579					0.36899	9.15262E-4		24.65	0		5.73669	0.00394
0.43632	2.15173					0.36928	9.15262E-4		24.75	0		5.75	0.00392
0.43709	2.16681					0.36958	9.15262E-4		24.85	0		5.76662	0.0039
0.43865	2.35102					0.36988	9.15262E-4		24.95	0		5.79655	0.00386
0.42958	2.45433					0.37018	9.15262E-4		25.05	0		5.82648	0.00382
0.43742	1.31489					0.37047	9.15262E-4		25.15	0		5.85	0.00379
0.44758	1.02458					0.3705	9.15262E-4		25.25	0		5.85641	0.00378
0.44904	0.69185					0.37077	9.15262E-4		25.35	0		5.88634	0.00374
0.44263	1.34531					0.37107	9.15262E-4		25.45	0		5.91627	0.0037
0.44393	1.22488					0.37136	9.15262E-4		25.55	0		5.9462	0.00366
0.44349	5.30267					0.37166	9.15262E-4		25.65	0		5.95	0.00366
0.45541	0.4042					0.37196	9.15262E-4		25.75	0		5.97613	0.00363
0.43768	1.52586					0.37226	9.15262E-4		25.85	0		6.00606	0.00359
0.44872	0.81201					0.37255	9.15262E-4		25.95	0		6.03599	0.00355
0.43998	5.54066					0.37285	9.15262E-4		26.05	0		6.05	0.00354
0.43642	3.1837					0.37315	9.15262E-4		26.15	0		6.06592	0.00352
0.44773	0.44061					0.37345	9.15262E-4		26.25	0		6.09585	0.00348
0.44448	4.16811					0.3735	9.15262E-4		26.35	8.70474E-5		6.12578	0.00345
0.4507	1.63069					0.37374	9.15262E-4		26.45	0		6.15	0.00342
0.45097	3.83297					0.37404	9.15262E-4		26.55	0		6.15571	0.00341
0.44058	0.58515					0.37434	9.15262E-4		26.65	0		6.18564	0.00338
0.49159	0.22413					0.37464	9.15262E-4		26.75	0		6.21557	0.00335
0.39431	3.48079					0.37493	9.15262E-4		26.85	0		6.2455	0.00331
0.44652	0.43618					0.37523	9.15262E-4		26.95	0		6.25	0.00331
0.43625	1.37126					0.37553	9.15262E-4		27.05	0		6.27543	0.00328
0.44172	5.9086					0.37582	9.15262E-4		27.15	0		6.30536	0.00325
0.44793	0.64441					0.37612	9.15262E-4		27.25	0		6.33529	0.00321
0.44132	0.97716					0.37642	9.15262E-4		27.35	0		6.35	0.0032
0.43774	1.41637					0.3765	9.15262E-4		27.45	0		6.36522	0.00318
0.44182	5.31556					0.37672	9.15262E-4		27.55	0		6.39515	0.00315
0.44216	4.00681					0.37701	9.15262E-4		27.65	0		6.42508	0.00312
0.39904	5.94153					0.37731	9.15262E-4		27.75	0		6.45	0.00309
0.42827	1.0797					0.37761	9.15262E-4		27.85	0		6.45501	0.00309
0.44008	5.70024					0.37791	9.15262E-4		27.95	0		6.48493	0.00306
0.44223	0.21528					0.3782	9.15262E-4		28.05	8.70474E-5		6.51486	0.00303
0.45079	0.75948					0.3785	9.15262E-4		28.15	0		6.54479	0.003
0.43241	9.68756					0.3788	9.15262E-4		28.25	0		6.55	0.00299
0.44879	0.68064					0.37909	9.15262E-4		28.35	0		6.57472	0.00297
0.45084	2.46125					0.37939	9.15262E-4		28.45	0		6.60465	0.00294
0.44248	2.4002					0.3795	9.15262E-4		28.55	0		6.63458	0.00291
0.44364	0.38462					0.37969	9.15262E-4		28.65	0		6.65	0.0029
0.43654	1.59108					0.37999	9.15262E-4		28.75	0		6.66451	0.00289
0.54665	0.37884					0.38028	9.15262E-4		28.85	0		6.69444	0.00286
0.44853	0.53549					0.38058	9.15262E-4		28.95	0		6.72437	0.00283
0.43489	2.49897					0.38088	9.15262E-4		29.05	0		6.75	0.00281
0.43764	2.4211					0.38118	9.15262E-4		29.15	0		6.7543	0.0028
0.44239	2.11128					0.38147	9.15262E-4		29.25	0		6.78423	0.00278
0.46124	0.55558					0.38177	9.15262E-4		29.35	0		6.81416	0.00275
0.44942	0.52951					0.38207	9.15262E-4		29.45	0		6.84409	0.00272
0.45077	0.8736					0.38236	9.15262E-4		29.55	0		6.85	0.00272
0.44625	0.87536					0.3825	9.15262E-4		29.65	0		6.87402	0.0027
0.45445	0.65835					0.38266	9.15262E-4		29.75	0		6.90395	0.00267
0.44416	2.65448					0.38296	9.15262E-4		29.85	0		6.93388	0.00265
0.44216	2.92123					0.38326	9.15262E-4		29.95	0		6.95	0.00263
0.43515	5.7339					0.38355	9.15262E-4					6.96381	0.00262
0.4496	0.71708					0.38385	9.15262E-4					6.99374	0.0026
0.43747	7.77048					0.38415	9.15262E-4					7.02367	0.00257
0.45518	0.48621					0.38445	9.15262E-4					7.05	0.00255
0.44894	2.47459					0.38474	9.15262E-4					7.0536	0.00255
0.43483	3.3319					0.38504	9.15262E-4					7.08353	0.00252
0.44324	1.48057					0.38534	9.15262E-4					7.11346	0.0025
0.4443	3.74244					0.3855	9.15262E-4					7.14339	0.00247
0.44516	2.19763					0.38564	9.15262E-4					7.15	0.00247
0.44419	4.31648					0.38593	9.15262E-4					7.17332	0.00245
0.4383	7.31523					0.38623	9.15262E-4					7.20325	0.00243
0.44146	1.45844					0.38653	9.15262E-4					7.23318	0.00241
0.43626	3.5964					0.38682	9.15262E-4					7.25	0.00239
0.44206	1.7318					0.38712	9.15262E-4					7.26311	0.00238
0.43718	2.76358					0.38742	9.15262E-4					7.29304	0.00236
0.43673	2.76508					0.38772	9.15262E-4					7.32297	0.00234
0.44597	1.3678					0.38801	9.15262E-4					7.35	0.00232
0.45052	1.40975					0.38831	9.15262E-4					7.3529	0.00232
0.44308	0.51542					0.3885	9.15262E-4					7.38283	0.0023
0.44735	0.68638					0.38861	9.15262E-4					7.41276	0.00227
0.43318	7.22822					0.38891	9.15262E-4					7.44269	0.00225
0.44543	0.80888					0.3892	9.15262E-4					7.45	0.00225
0.44603	8.61525					0.3895	9.15262E-4					7.47262	0.00223
0.45815	0.70546					0.3898	9.15263E-4					7.50255	0.00221
0.45354	0.51158					0.39009	9.15263E-4					7.53248	0.00219
0.44481	0.76207					0.39039	9.15263E-4					7.55	0.00218
0.43792	1.83987					0.39069	9.15263E-4					7.56241	0.00217
0.44394	3.02715					0.39099	9.15263E-4					7.59234	0.00215
0.43193	0.97461					0.39128	9.15264E-4					7.62227	0.00213
0.44118	0.92446					0.3915	9.15264E-4					7.65	0.00211
0.45864	0.39269					0.39158	9.15264E-4					7.6522	0.00211
0.44637	3.08114					0.39188	9.15265E-4					7.68213	0.00209
0.43699	4.2676					0.39218	9.15265E-4					7.71206	0.00207
0.45512	0.9314					0.39247	9.15266E-4					7.74199	0.00205
0.43715	2.3511					0.39277	9.15267E-4					7.75	0.00205
0.44753	1.16484					0.39307	9.15268E-4					7.77192	0.00204
0.44953	0.28599					0.39336	9.15269E-4					7.80185	0.00202
0.44277	0.56445					0.39366	9.15271E-4					7.83178	0.002
0.44301	0.76108					0.39396	9.15273E-4					7.85	0.00199
0.4437	3.07437					0.39426	9.15275E-4					7.86171	0.00198
0.44666	5.60712					0.3945	9.15277E-4					7.89164	0.00196
0.43858	3.36126					0.39455	9.15277E-4					7.92157	0.00194
0.44682	0.69072					0.39485	9.15281E-4					7.95	0.00193
0.44086	1.57614					0.39515	9.15284E-4					7.9515	0.00193
0.44556	3.35281					0.39545	9.15289E-4					7.98143	0.00191
0.44658	0.52375					0.39574	9.15294E-4					8.01136	0.00189
0.43623	8.21647					0.39604	9.153E-4					8.04129	0.00188
0.44817	10.6926					0.39634	9.15307E-4					8.05	0.00187
0.43059	6.07304					0.39664	9.15316E-4					8.07122	0.00186
0.44817	3.26781					0.39693	9.15326E-4					8.10115	0.00184
0.4366	4.98994					0.39723	9.15338E-4					8.13108	0.00182
0.43908	0.988					0.3975	9.15351E-4					8.15	0.00181
0.47607	0.34354					0.39753	9.15353E-4					8.16101	0.00181
0.46281	0.22006					0.39782	9.1537E-4					8.19094	0.00179
0.4773	0.26829					0.39812	9.1539E-4					8.22087	0.00178
0.43068	1.42009					0.39842	9.15413E-4					8.25	0.00176
0.43583	8.58822					0.39872	9.15441E-4					8.2508	0.00176
0.42017	15.0435					0.39901	9.15473E-4					8.28073	0.00174
0.45405	1.22808					0.39931	9.15511E-4					8.31066	0.00173
0.43317	5.8911					0.39961	9.15556E-4					8.34059	0.00171
0.45144	0.4721					0.39991	9.15608E-4					8.35	0.00171
0.43757	0.6422					0.4002	9.15669E-4					8.37052	0.0017
0.43129	0.89797					0.4005	9.1574E-4					8.40045	0.00168
0.49441	0.24079					0.4008	9.15823E-4					8.43038	0.00167
0.42549	3.18472					0.40109	9.15919E-4					8.45	0.00166
0.50666	0.20845					0.40139	9.16032E-4					8.46031	0.00165
0.43226	5.67495					0.40169	9.16163E-4					8.49024	0.00164
0.4403	3.18084					0.40199	9.16315E-4					8.52017	0.00162
0.43792	2.69199					0.40228	9.16491E-4					8.55	0.00161
0.43494	6.93507					0.40258	9.16696E-4					8.5501	0.00161
0.45169	4.52001					0.40288	9.16933E-4					8.58003	0.0016
0.5881	0.23829					0.40318	9.17206E-4					8.60996	0.00158
0.44741	1.4067					0.40347	9.17523E-4					8.63989	0.00157
0.46045	0.9046					0.4035	9.17554E-4					8.65	0.00156
0.4426	0.87684					0.40377	9.17888E-4					8.66982	0.00155
0.44888	1.0227					0.40407	9.18309E-4					8.69975	0.00154
0.44509	2.44404					0.40436	9.18794E-4					8.72968	0.00153
0.44599	1.57084					0.40466	9.19351E-4					8.75	0.00152
0.43095	1.64265					0.40496	9.19992E-4					8.75961	0.00151
0.43638	6.28226					0.40526	9.20727E-4					8.78954	0.0015
0.43401	5.51974					0.40555	9.21571E-4					8.81947	0.00149
0.44903	3.26404					0.40585	9.22536E-4					8.8494	0.00147
0.45837	2.44667					0.40615	9.23641E-4					8.85	0.00147
0.43672	0.64267					0.40645	9.24904E-4					8.87933	0.00146
0.43317	4.2242					0.4065	9.25152E-4					8.90926	0.00145
0.48123	0.33486					0.40674	9.26345E-4					8.93919	0.00143
0.44429	1.71888					0.40704	9.27989E-4					8.95	0.00143
0.45494	1.26462					0.40734	9.29861E-4					8.96912	0.00142
0.44667	0.45078					0.40764	9.31991E-4					8.99905	0.00141
0.45033	0.54868					0.40793	9.34412E-4					9.02898	0.0014
0.45122	5.12668					0.40823	9.37161E-4					9.05	0.00139
0.44363	4.71521					0.40853	9.40278E-4					9.05891	0.00139
0.43639	0.38436					0.40882	9.4381E-4					9.08884	0.00137
0.37665	4.21983					0.40912	9.47806E-4					9.11877	0.00136
0.44273	3.68846					0.40942	9.52322E-4					9.1487	0.00135
0.43255	2.36805					0.4095	9.53653E-4					9.15	0.00135
0.44286	5.99725					0.40972	9.57422E-4					9.17863	0.00134
0.4449	0.28784					0.41001	9.63174E-4					9.20856	0.00133
0.46343	0.79948					0.41031	9.69654E-4					9.23849	0.00131
0.43599	4.7157					0.41061	9.76946E-4					9.25	0.00131
0.45745	2.04875					0.41091	9.85144E-4					9.26842	0.0013
0.39703	0.20294					0.4112	9.94348E-4					9.29835	0.00129
0.46619	0.35478					0.4115	0.001					9.32828	0.00128
0.4479	0.43087					0.4118	0.00102					9.35	0.00127
0.43936	2.74015					0.41209	0.00103					9.35821	0.00127
0.43852	1.73236					0.41239	0.00104					9.38814	0.00126
0.45094	2.11977					0.4125	0.00105					9.41807	0.00125
0.44124	2.09042					0.41269	0.00106					9.448	0.00124
0.45181	0.81863					0.41299	0.00108					9.45	0.00124
0.44642	1.43711					0.41328	0.0011					9.47793	0.00123
0.44117	1.23253					0.41358	0.00112					9.50786	0.00122
0.44298	4.10428					0.41388	0.00115					9.53779	0.0012
0.44554	0.73145					0.41418	0.00117					9.55	0.0012
0.44689	0.65629					0.41447	0.0012					9.56772	0.00119
0.43952	1.80287					0.41477	0.00124					9.59765	0.00118
0.44682	3.55069					0.41507	0.00127					9.62758	0.00117
0.44142	1.38456					0.41536	0.00132					9.65	0.00117
0.44299	2.06173					0.4155	0.00134					9.65751	0.00116
0.43133	7.53689					0.41566	0.00136					9.68744	0.00115
0.44938	0.60359					0.41596	0.00141					9.71737	0.00114
0.43871	2.95496					0.41626	0.00147					9.7473	0.00113
0.46679	0.45854					0.41655	0.00153					9.75	0.00113
0.44447	0.75171					0.41685	0.0016					9.77723	0.00112
0.42891	3.67146					0.41715	0.00167					9.80716	0.00111
0.25008	0.39497					0.41745	0.00175					9.83709	0.0011
0.43612	0.92067					0.41774	0.00184					9.85	0.0011
0.43795	1.70073					0.41804	0.00194					9.86702	0.00109
0.43249	3.87839					0.41834	0.00204					9.89695	0.00109
0.44702	1.74399					0.4185	0.00211					9.92688	0.00108
0.47515	0.31662					0.41864	0.00216					9.95	0.00107
0.45095	0.90682					0.41893	0.00229					9.95681	0.00107
0.44787	2.71036					0.41923	0.00242					9.98674	0.00106
0.4427	3.86176					0.41953	0.00257					10.0167	0.00105
0.40809	3.56707					0.41982	0.00274					10.0466	0.00104
0.42977	3.08264					0.42012	0.00291					10.05	0.00104
0.43823	2.11788					0.42042	0.0031					10.0765	0.00103
0.43746	0.33272					0.42072	0.00331					10.1065	0.00102
0.43901	0.9278					0.42101	0.00354					10.1364	0.00101
0.44139	0.88062					0.42131	0.00378					10.15	0.00101
0.43794	3.32326					0.4215	0.00394					10.1663	0.001
0.43972	1.74035					0.42161	0.00404					10.1962	9.95548E-4
0.43868	0.851					0.42191	0.00432					10.2262	9.86979E-4
0.43675	1.8566					0.4222	0.00462					10.25	9.80212E-4
0.44413	2.14344					0.4225	0.00495					10.2561	9.78486E-4
0.43679	7.014					0.4228	0.0053					10.286	9.70065E-4
0.43282	5.45928					0.42309	0.00568					10.316	9.61718E-4
0.43822	7.22931					0.42339	0.00608					10.3459	9.53442E-4
0.45044	0.99701					0.42369	0.00651					10.35	9.52313E-4
0.45003	0.90034					0.42399	0.00697					10.3758	9.45238E-4
0.42963	7.87926					0.42428	0.00746					10.4058	9.37104E-4
0.44015	4.95206					0.4245	0.00784					10.4357	9.2904E-4
0.44066	4.39806					0.42458	0.00798					10.45	9.25208E-4
0.45343	0.37107					0.42488	0.00854					10.4656	9.21045E-4
0.41798	0.91339					0.42518	0.00913					10.4955	9.13118E-4
0.4439	6.78628					0.42547	0.00976					10.5255	9.05259E-4
0.45375	15.1442					0.42577	0.01043					10.55	8.98869E-4
0.44397	1.4404					0.42607	0.01114					10.5554	8.97466E-4
0.43743	7.70655					0.42636	0.01189					10.5853	8.8974E-4
0.43792	0.88691					0.42666	0.01268					10.6153	8.82079E-4
0.44653	2.05082					0.42696	0.01352					10.6452	8.74483E-4
0.43242	0.49826					0.42726	0.0144					10.65	8.7327E-4
0.44835	2.10782					0.4275	0.01516					10.6751	8.66951E-4
0.44438	1.65695					0.42755	0.01533					10.7051	8.59483E-4
0.44887	4.94114					0.42785	0.01631					10.735	8.52077E-4
0.40856	8.03867					0.42815	0.01733					10.75	8.48385E-4
0.43862	1.28996					0.42845	0.01841					10.7649	8.44733E-4
0.43842	2.92845					0.42874	0.01954					10.7948	8.37451E-4
0.50812	3.70744					0.42904	0.02071					10.8248	8.3023E-4
0.44695	3.08689					0.42934	0.02195					10.85	8.2419E-4
0.44551	1.64077					0.42964	0.02323					10.8547	8.23069E-4
0.4608	0.40441					0.42993	0.02457					10.8846	8.15967E-4
0.43917	7.26384					0.43023	0.02597					10.9146	8.08925E-4
0.44749	1.40405					0.4305	0.02728					10.9445	8.0194E-4
0.44547	0.77086					0.43053	0.02741					10.95	8.00662E-4
0.44378	1.60692					0.43082	0.02892					10.9744	7.95014E-4
0.42964	4.33177					0.43112	0.03047					11.0044	7.88145E-4
0.44185	1.97011					0.43142	0.03209					11.0343	7.81333E-4
0.4317	2.42493					0.43172	0.03375					11.05	7.77778E-4
0.43886	3.26039					0.43201	0.03547					11.0642	7.74576E-4
0.44861	1.71863					0.43231	0.03724					11.0941	7.67875E-4
0.44697	2.93761					0.43261	0.03906					11.1241	7.61229E-4
0.43481	6.10114					0.43291	0.04093					11.15	7.55516E-4
0.43963	4.28574					0.4332	0.04285					11.154	7.54638E-4
0.42647	0.77909					0.4335	0.04482					11.1839	7.481E-4
0.43311	11.7446					0.4338	0.04683					11.2139	7.41615E-4
0.43969	1.92687					0.43409	0.04888					11.2438	7.35183E-4
0.44956	1.32137					0.43439	0.05098					11.25	7.33856E-4
0.46812	0.38713					0.43469	0.05311					11.2737	7.28804E-4
0.43237	1.8858					0.43499	0.05527					11.3036	7.22476E-4
0.4539	0.72819					0.43528	0.05746					11.3336	7.162E-4
0.43782	12.0692					0.43558	0.05969					11.35	7.12778E-4
0.44518	0.64489					0.43588	0.06193					11.3635	7.09974E-4
0.43431	1.72774					0.43618	0.0642					11.3934	7.03798E-4
0.4938	0.23666					0.43647	0.06648					11.4234	6.97672E-4
0.43617	8.73286					0.4365	0.06669					11.45	6.92263E-4
0.42982	5.5764					0.43677	0.06878					11.4533	6.91595E-4
0.44684	0.96413					0.43707	0.07108					11.4832	6.85567E-4
0.43422	4.33517					0.43736	0.07338					11.5132	6.79587E-4
0.43448	8.85582					0.43766	0.07568					11.5431	6.73655E-4
0.44003	5.2041					0.43796	0.07798					11.55	6.72292E-4
0.43749	2.31396					0.43826	0.08026					11.573	6.6777E-4
0.43109	4.18636					0.43855	0.08253					11.6029	6.61932E-4
0.38697	0.49774					0.43885	0.08477					11.6329	6.5614E-4
0.44477	0.51246					0.43915	0.08699					11.65	6.52848E-4
0.44586	0.62883					0.43945	0.08917					11.6628	6.50394E-4
0.45051	0.3555					0.4395	0.08956					11.6927	6.44694E-4
0.44645	3.38967					0.43974	0.09131					11.7227	6.39039E-4
0.43816	3.18692					0.44004	0.09341					11.75	6.33914E-4
0.42428	0.70171					0.44034	0.09546					11.7526	6.33428E-4
0.44423	5.675					0.44064	0.09746					11.7825	6.27861E-4
0.39195	1.1388					0.44093	0.0994					11.8125	6.22339E-4
0.44065	0.33107					0.44123	0.10127					11.8424	6.16859E-4
0.47073	0.79883					0.44153	0.10306					11.85	6.15473E-4
0.42798	1.58826					0.44182	0.10479					11.8723	6.11423E-4
0.44894	2.78251					0.44212	0.10643					11.9023	6.06028E-4
0.44809	1.27335					0.44242	0.10799					11.9322	6.00676E-4
0.43597	3.42062					0.4425	0.1084					11.95	5.9751E-4
0.43706	1.15133					0.44272	0.10946					11.9621	5.95366E-4
0.45406	0.41208					0.44301	0.11083					11.992	5.90097E-4
0.43819	5.04386					0.44331	0.1121					12.022	5.84869E-4
0.44422	0.46278					0.44361	0.11328					12.05	5.80009E-4
0.439	1.31207					0.44391	0.11435					12.0519	5.79681E-4
0.44506	1.04217					0.4442	0.1153					12.0818	5.74533E-4
0.36953	8.66582					0.4445	0.11615					12.1118	5.69426E-4
0.45585	2.15491					0.4448	0.11689					12.1417	5.64357E-4
0.44078	0.8147					0.44509	0.1175					12.15	5.62957E-4
0.45098	1.21955					0.44539	0.118					12.1716	5.59328E-4
0.44578	1.22471					0.4455	0.11815					12.2015	5.54337E-4
0.44733	2.57128					0.44569	0.11838					12.2315	5.49384E-4
0.44163	4.89706					0.44599	0.11864					12.25	5.46339E-4
0.44119	0.68916					0.44628	0.11877					12.2614	5.44469E-4
0.4485	1.74911					0.44658	0.11878					12.2913	5.39592E-4
0.47937	0.26106					0.44688	0.11867					12.3213	5.34752E-4
0.4377	4.82372					0.44718	0.11844					12.35	5.30141E-4
0.43896	1.36289					0.44747	0.11809					12.3512	5.29949E-4
0.43557	4.39177					0.44777	0.11762					12.3811	5.25182E-4
0.43231	0.76414					0.44807	0.11702					12.4111	5.20451E-4
0.44666	3.00843					0.44836	0.11632					12.441	5.15756E-4
0.43487	1.78384					0.4485	0.11595					12.45	5.1435E-4
0.43143	1.69677					0.44866	0.11549					12.4709	5.11097E-4
0.43846	1.56764					0.44896	0.11456					12.5008	5.06473E-4
0.44316	3.57192					0.44926	0.11351					12.5308	5.01884E-4
0.43706	5.39589					0.44955	0.11236					12.55	4.98955E-4
0.44457	3.3329					0.44985	0.1111					12.5607	4.97329E-4
0.42838	2.13951					0.45015	0.10975					12.5906	4.92808E-4
0.45076	0.46649					0.45045	0.1083					12.6206	4.88322E-4
0.43536	1.88508					0.45074	0.10676					12.65	4.83943E-4
0.43616	5.90674					0.45104	0.10514					12.6505	4.83868E-4
0.43504	2.26388					0.45134	0.10343					12.6804	4.79449E-4
0.43286	3.73555					0.4515	0.10247					12.7104	4.75062E-4
0.44492	1.32884					0.45164	0.10165					12.7403	4.70707E-4
0.44072	4.57962					0.45193	0.09979					12.75	4.69302E-4
0.462	0.48416					0.45223	0.09787					12.7702	4.66385E-4
0.43226	2.32073					0.45253	0.09589					12.8002	4.62096E-4
0.43492	2.24494					0.45282	0.09385					12.8301	4.57837E-4
0.44726	1.82813					0.45312	0.09176					12.85	4.55021E-4
0.46527	0.23543					0.45342	0.08962					12.86	4.53611E-4
0.44501	3.66006					0.45372	0.08745					12.8899	4.49415E-4
0.44599	3.34139					0.45401	0.08524					12.9199	4.45251E-4
0.43978	2.4543					0.45431	0.083					12.9498	4.41117E-4
0.43988	6.26141					0.4545	0.08156					12.95	4.41089E-4
0.43345	5.19858					0.45461	0.08074					12.9797	4.37014E-4
0.44955	2.80968					0.45491	0.07846					13.0097	4.3294E-4
0.45518	4.75897					0.4552	0.07616					13.0396	4.28896E-4
0.43018	3.79895					0.4555	0.07386					13.05	4.27497E-4
0.44738	1.87961					0.4558	0.07156					13.0695	4.24882E-4
0.44532	3.46833					0.45609	0.06926					13.0994	4.20898E-4
0.45556	0.31129					0.45639	0.06696					13.1294	4.16942E-4
0.43733	5.41874					0.45669	0.06468					13.15	4.14233E-4
0.43751	2.89547					0.45699	0.06241					13.1593	4.13015E-4
0.44908	0.96478					0.45728	0.06016					13.1892	4.09116E-4
0.44119	0.85596					0.4575	0.05853					13.2192	4.05246E-4
0.44236	5.52472					0.45758	0.05793					13.2491	4.01404E-4
0.44142	0.53348					0.45788	0.05573					13.25	4.01289E-4
0.44194	1.64242					0.45818	0.05356					13.279	3.9759E-4
0.44057	4.05835					0.45847	0.05142					13.309	3.93803E-4
0.43871	1.16241					0.45877	0.04932					13.3389	3.90043E-4
0.42654	0.66109					0.45907	0.04726					13.35	3.88654E-4
0.44857	5.32036					0.45936	0.04524					13.3688	3.8631E-4
0.43934	5.64398					0.45966	0.04326					13.3987	3.82605E-4
0.43491	3.9186					0.45996	0.04133					13.4287	3.78925E-4
0.43455	9.54831					0.46026	0.03945					13.45	3.7632E-4
0.39231	3.92756					0.4605	0.03795					13.4586	3.75272E-4
0.42749	4.23154					0.46055	0.03762					13.4885	3.71645E-4
0.42268	1.27557					0.46085	0.03584					13.5185	3.68044E-4
0.44372	1.39811					0.46115	0.03411					13.5484	3.64469E-4
0.43366	2.88259					0.46145	0.03243					13.55	3.64278E-4
0.43465	12.7233					0.46174	0.03081					13.5783	3.60919E-4
0.42056	2.03088					0.46204	0.02924					13.6083	3.57394E-4
0.44355	0.42236					0.46234	0.02772					13.6382	3.53895E-4
0.42488	1.78716					0.46264	0.02626					13.65	3.5252E-4
0.44353	2.74384					0.46293	0.02486					13.6681	3.5042E-4
0.43819	3.13676					0.46323	0.02351					13.6981	3.46969E-4
0.43866	6.1571					0.4635	0.02233					13.728	3.43543E-4
0.44137	0.84775					0.46353	0.02221					13.75	3.41038E-4
0.44208	4.18828					0.46382	0.02097					13.7579	3.40141E-4
0.44913	0.55144					0.46412	0.01978					13.7878	3.36763E-4
0.44495	0.88654					0.46442	0.01864					13.8178	3.33409E-4
0.43631	1.17544					0.46472	0.01755					13.8477	3.30078E-4
0.4436	2.41306					0.46501	0.01652					13.85	3.29822E-4
0.44174	3.46686					0.46531	0.01553					13.8776	3.2677E-4
0.42294	4.73055					0.46561	0.01459					13.9076	3.23486E-4
0.44149	1.86773					0.46591	0.0137					13.9375	3.20224E-4
0.43615	7.80413					0.4662	0.01285					13.95	3.18867E-4
0.43983	6.73641					0.4665	0.01205					13.9674	3.16985E-4
0.43783	3.70022					0.4668	0.01129					13.9974	3.13769E-4
0.43873	2.78292					0.46709	0.01058					14.0273	3.10575E-4
0.4331	2.95036					0.46739	0.0099					14.05	3.08165E-4
0.43105	0.51999					0.46769	0.00926					14.0572	3.07403E-4
0.45879	0.36353					0.46799	0.00866					14.0871	3.04253E-4
0.45447	1.83719					0.46828	0.0081					14.1171	3.01125E-4
0.44396	0.41453					0.46858	0.00757					14.147	2.98019E-4
0.44296	1.26294					0.46888	0.00707					14.15	2.97708E-4
0.44609	1.5838					0.46918	0.0066					14.1769	2.94934E-4
0.45106	1.00721					0.46947	0.00617					14.2069	2.9187E-4
0.4474	3.7196					0.4695	0.00613					14.2368	2.88827E-4
0.4504	5.03748					0.46977	0.00576					14.25	2.8749E-4
0.44705	0.53401					0.47007	0.00538					14.2667	2.85805E-4
0.42973	7.4732					0.47036	0.00502					14.2966	2.82804E-4
0.44404	1.54006					0.47066	0.00469					14.3266	2.79823E-4
0.45538	0.52633					0.47096	0.00438					14.35	2.77504E-4
0.44324	0.59572					0.47126	0.0041					14.3565	2.76862E-4
0.43948	1.81827					0.47155	0.00383					14.3864	2.73922E-4
0.4252	1.12216					0.47185	0.00358					14.4164	2.71002E-4
0.43462	2.21066					0.47215	0.00336					14.4463	2.68102E-4
0.45736	0.43828					0.47245	0.00315					14.45	2.67744E-4
0.44884	0.76257					0.4725	0.00311					14.4762	2.65221E-4
0.42362	1.99731					0.47274	0.00295					14.5062	2.6236E-4
0.42487	7.16747					0.47304	0.00277					14.5361	2.59518E-4
0.46643	0.20842					0.47334	0.00261					14.55	2.58203E-4
0.44323	1.64711					0.47364	0.00245					14.566	2.56695E-4
0.44321	2.96696					0.47393	0.00231					14.596	2.53892E-4
0.44234	0.62913					0.47423	0.00218					14.6259	2.51107E-4
0.44212	9.01658					0.47453	0.00207					14.65	2.48876E-4
0.42562	2.80223					0.47482	0.00196					14.6558	2.48341E-4
0.42941	7.92803					0.47512	0.00186					14.6857	2.45594E-4
0.44934	4.24726					0.47542	0.00177					14.7157	2.42865E-4
0.43999	0.39681					0.4755	0.00175					14.7456	2.40154E-4
0.44073	5.63846					0.47572	0.00169					14.75	2.39756E-4
0.44609	0.60783					0.47601	0.00161					14.7755	2.37461E-4
0.44775	1.79617					0.47631	0.00154					14.8055	2.34787E-4
0.47235	0.26875					0.47661	0.00148					14.8354	2.3213E-4
0.4528	0.61059					0.47691	0.00142					14.85	2.30839E-4
0.4397	0.80929					0.4772	0.00137					14.8653	2.29491E-4
0.4297	3.42867					0.4775	0.00133					14.8953	2.26869E-4
0.43906	6.17467					0.4778	0.00128					14.9252	2.24265E-4
0.44172	2.94009					0.47809	0.00124					14.95	2.22118E-4
0.43838	2.25439					0.47839	0.00121					14.9551	2.21678E-4
0.43205	3.97431					0.4785	0.0012					14.985	2.19108E-4
0.43012	2.05078					0.47869	0.00118					15.015	2.16555E-4
0.40186	1.12794					0.47899	0.00115					15.0449	2.14019E-4
0.43047	3.10152					0.47928	0.00113					15.05	2.13588E-4
0.43582	3.46515					0.47958	0.0011					15.0748	2.115E-4
0.41989	11.6897					0.47988	0.00108					15.1047	2.08997E-4
0.45383	0.4674					0.48018	0.00106					15.1347	2.06511E-4
0.4436	2.00778					0.48047	0.00105					15.15	2.05245E-4
0.39291	13.5341					0.48077	0.00103					15.1646	2.04041E-4
0.44423	0.58149					0.48107	0.00102					15.1945	2.01587E-4
0.43369	3.12354					0.48136	0.00101					15.2245	1.99149E-4
0.40512	1.09877					0.4815	0.001					15.25	1.97083E-4
0.3869	1.58417					0.48166	9.9641E-4					15.2544	1.96728E-4
0.45023	0.97909					0.48196	9.86982E-4					15.2843	1.94322E-4
0.43685	2.43865					0.48226	9.78582E-4					15.3143	1.91931E-4
0.44043	5.76259					0.48255	9.71109E-4					15.3442	1.89556E-4
0.44251	8.21997					0.48285	9.64466E-4					15.35	1.89097E-4
0.44465	0.9279					0.48315	9.58569E-4					15.3741	1.87197E-4
0.44704	2.78925					0.48345	9.53338E-4					15.404	1.84853E-4
0.44505	0.9555					0.48374	9.48705E-4					15.434	1.82524E-4
0.47461	0.37168					0.48404	9.44605E-4					15.45	1.81284E-4
0.48611	0.24941					0.48434	9.40981E-4					15.4639	1.8021E-4
0.46523	0.20535					0.4845	9.39186E-4					15.4938	1.77911E-4
0.42603	2.05369					0.48464	9.37781E-4					15.5238	1.75627E-4
0.44295	0.82748					0.48493	9.34959E-4					15.55	1.73637E-4
0.44467	1.0429					0.48523	9.32472E-4					15.5537	1.73357E-4
0.43809	6.78465					0.48553	9.30284E-4					15.5836	1.71103E-4
0.43598	8.37405					0.48582	9.28361E-4					15.6136	1.68862E-4
0.44345	2.05903					0.48612	9.26671E-4					15.6435	1.66636E-4
0.43083	2.81461					0.48642	9.2519E-4					15.65	1.66154E-4
0.44267	3.14162					0.48672	9.23892E-4					15.6734	1.64424E-4
0.43182	0.36424					0.48701	9.22755E-4					15.7034	1.62227E-4
0.4454	0.83909					0.48731	9.21762E-4					15.7333	1.60043E-4
0.44258	3.28766					0.4875	9.21196E-4					15.75	1.5883E-4
0.44301	2.94294					0.48761	9.20894E-4					15.7632	1.57874E-4
0.44292	3.23249					0.48791	9.20138E-4					15.7931	1.55718E-4
0.4308	8.47185					0.4882	9.19478E-4					15.8231	1.53576E-4
0.43069	0.30293					0.4885	9.18904E-4					15.85	1.5166E-4
0.44895	4.03941					0.4888	9.18405E-4					15.853	1.51447E-4
0.45441	1.01581					0.48909	9.17971E-4					15.8829	1.49332E-4
0.44632	1.4965					0.48939	9.17595E-4					15.9129	1.4723E-4
0.4391	3.72028					0.48969	9.17269E-4					15.9428	1.45142E-4
0.46194	0.38331					0.48999	9.16987E-4					15.95	1.44641E-4
0.44854	1.6048					0.49028	9.16743E-4					15.9727	1.43067E-4
0.441	4.46212					0.4905	9.16586E-4					16.0026	1.41004E-4
0.44145	1.83571					0.49058	9.16532E-4					16.0326	1.38955E-4
0.43326	2.03616					0.49088	9.1635E-4					16.05	1.37769E-4
0.44531	1.15184					0.49118	9.16193E-4					16.0625	1.36919E-4
0.43328	11.9042					0.49147	9.16058E-4					16.0924	1.34896E-4
0.43334	4.16095					0.49177	9.15942E-4					16.1224	1.32885E-4
0.43977	2.26887					0.49207	9.15842E-4					16.15	1.3104E-4
0.43636	1.74793					0.49236	9.15756E-4					16.1523	1.30887E-4
0.44756	2.18214					0.49266	9.15683E-4					16.1822	1.28901E-4
0.45096	0.9186					0.49296	9.1562E-4					16.2122	1.26928E-4
0.4355	2.40714					0.49326	9.15566E-4					16.2421	1.24967E-4
0.43761	1.59818					0.4935	9.15528E-4					16.25	1.2445E-4
0.43719	2.07014					0.49355	9.1552E-4					16.272	1.23018E-4
0.43338	6.3692					0.49385	9.15481E-4					16.302	1.21081E-4
0.43873	5.20392					0.49415	9.15447E-4					16.3319	1.19156E-4
0.44081	1.99899					0.49445	9.15419E-4					16.35	1.17997E-4
0.43979	4.41119					0.49474	9.15394E-4					16.3618	1.17244E-4
0.44966	7.49976					0.49504	9.15374E-4					16.3917	1.15343E-4
0.43605	0.76868					0.49534	9.15356E-4					16.4217	1.13454E-4
0.4354	2.83825					0.49564	9.15341E-4					16.45	1.11676E-4
0.45327	0.26398					0.49593	9.15329E-4					16.4516	1.11576E-4
0.43898	8.10659					0.49623	9.15318E-4					16.4815	1.0971E-4
0.43989	1.93074					0.4965	9.1531E-4					16.5115	1.07856E-4
0.44216	1.10028					0.49653	9.15309E-4					16.5414	1.06013E-4
0.44184	0.98192					0.49682	9.15301E-4					16.55	1.05485E-4
0.44467	1.15238					0.49712	9.15295E-4					16.5713	1.04181E-4
0.44238	2.92539					0.49742	9.1529E-4					16.6013	1.02361E-4
0.45919	1.63543					0.49772	9.15285E-4					16.6312	1.00552E-4
0.44338	1.39771					0.49801	9.15281E-4					16.65	9.94196E-5
0.4407	7.12476					0.49831	9.15278E-4					16.6611	9.87533E-5
0.43524	1.75044					0.49861	9.15275E-4					16.691	9.69661E-5
0.46089	0.80206					0.49891	9.15273E-4					16.721	9.51898E-5
0.44008	2.72337					0.4992	9.15271E-4					16.75	9.34773E-5
0.44432	0.5574					0.4995	9.1527E-4					16.7509	9.34243E-5
0.43953	7.79938					0.4998	9.15268E-4					16.7808	9.16695E-5
0.43418	5.9432					0.50009	9.15267E-4					16.8108	8.99254E-5
0.43683	2.76823					0.50039	9.15266E-4					16.8407	8.8192E-5
0.45002	0.7928					0.50069	9.15265E-4					16.85	8.76549E-5
0.45971	0.477					0.50099	9.15265E-4					16.8706	8.6469E-5
0.44013	2.49834					0.50128	9.15264E-4					16.9005	8.47564E-5
0.43936	2.87308					0.50158	9.15264E-4					16.9305	8.30542E-5
0.43576	2.62775					0.50188	9.15264E-4					16.95	8.19496E-5
0.43528	1.06303					0.50218	9.15263E-4					16.9604	8.13623E-5
0.44053	2.94317					0.50247	9.15263E-4					16.9903	7.96806E-5
0.459	0.81864					0.5025	9.15263E-4					17.0203	7.8009E-5
0.44883	2.18424					0.50277	9.15263E-4					17.05	7.63585E-5
0.46034	0.2863					0.50307	9.15263E-4					17.0502	7.63474E-5
0.46168	0.45627					0.50336	9.15262E-4					17.0801	7.46959E-5
0.4907	0.24449					0.50366	9.15262E-4					17.1101	7.30542E-5
0.44512	1.1749					0.50396	9.15262E-4					17.14	7.14224E-5
0.43307	9.15663					0.50426	9.15262E-4					17.15	7.08788E-5
0.42813	3.21547					0.50455	9.15262E-4					17.1699	6.98003E-5
0.44533	1.59273					0.50485	9.15262E-4					17.1999	6.8188E-5
0.45066	0.7489					0.50515	9.15262E-4					17.2298	6.65852E-5
0.44326	0.78259					0.50545	9.15262E-4					17.25	6.55078E-5
0.44349	0.54185					0.5055	9.15262E-4					17.2597	6.4992E-5
0.45046	2.33693					0.50574	9.15262E-4					17.2896	6.34083E-5
0.46753	0.28848					0.50604	9.15262E-4					17.3196	6.1834E-5
0.42089	2.10237					0.50634	9.15262E-4					17.3495	6.02691E-5
0.45827	0.66266					0.50664	9.15262E-4					17.35	6.0243E-5
0.43475	5.15401					0.50693	9.15262E-4					17.3794	5.87134E-5
0.52718	0.45873					0.50723	9.15262E-4					17.4094	5.71669E-5
0.45603	0.83902					0.50753	9.15262E-4					17.4393	5.56296E-5
0.44322	1.98794					0.50782	9.15262E-4					17.45	5.50817E-5
0.44604	2.02099					0.50812	9.15262E-4					17.4692	5.41014E-5
0.43561	3.37133					0.50842	9.15262E-4					17.4992	5.25822E-5
0.44855	1.07968					0.5085	9.15262E-4					17.5291	5.10719E-5
0.43802	2.57982					0.50872	9.15262E-4					17.55	5.00215E-5
0.43839	2.30242					0.50901	9.15262E-4					17.559	4.95705E-5
0.44018	2.59838					0.50931	9.15262E-4					17.5889	4.80779E-5
0.44564	2.14451					0.50961	9.15262E-4					17.6189	4.65941E-5
0.45915	1.14786					0.50991	9.15262E-4					17.6488	4.5119E-5
0.44511	1.6635					0.5102	9.15262E-4					17.65	4.506E-5
0.45215	0.68581					0.5105	9.15262E-4					17.6787	4.36526E-5
0.43173	7.88446					0.5108	9.15262E-4					17.7087	4.21947E-5
0.43517	1.42233					0.51109	9.15262E-4					17.7386	4.07453E-5
0.43433	5.73778					0.51139	9.15262E-4					17.75	4.01949E-5
0.44774	0.36941					0.5115	9.15262E-4					17.7685	3.93043E-5
0.98585	0.28742					0.51169	9.15262E-4					17.7984	3.78718E-5
0.43542	4.99972					0.51199	9.15262E-4					17.8284	3.64476E-5
0.46498	0.38264					0.51228	9.15262E-4					17.85	3.54239E-5
0.44182	6.17953					0.51258	9.15262E-4					17.8583	3.50317E-5
0.44457	1.96396					0.51288	9.15262E-4					17.8882	3.3624E-5
0.43483	0.62508					0.51318	9.15262E-4					17.9182	3.22244E-5
0.44801	1.86011					0.51347	9.15262E-4					17.9481	3.08329E-5
0.44918	2.95549					0.51377	9.15262E-4					17.95	3.07448E-5
0.44302	5.59703					0.51407	9.15262E-4					17.978	2.94495E-5
0.42957	6.18399					0.51436	9.15262E-4					18.008	2.80741E-5
0.45527	0.4345					0.5145	9.15262E-4					18.0379	2.67066E-5
0.43645	9.10735					0.51466	9.15262E-4					18.05	2.61555E-5
0.44431	2.21401					0.51496	9.15262E-4					18.0678	2.5347E-5
0.44777	1.57653					0.51526	9.15262E-4					18.0978	2.39952E-5
0.44281	2.80773					0.51555	9.15262E-4					18.1277	2.26512E-5
0.44173	1.19936					0.51585	9.15262E-4					18.15	2.16538E-5
0.43744	1.25871					0.51615	9.15262E-4					18.1576	2.13149E-5
0.44387	2.57672					0.51645	9.15262E-4					18.1875	1.99862E-5
0.4329	3.78758					0.51674	9.15262E-4					18.2175	1.86651E-5
0.44155	1.41667					0.51704	9.15262E-4					18.2474	1.73516E-5
0.44827	1.416					0.51734	9.15262E-4					18.25	1.72378E-5
0.44393	1.75832					0.5175	9.15262E-4					18.2773	1.60456E-5
0.43563	3.32405					0.51764	9.15262E-4					18.3073	1.47471E-5
0.45717	0.6034					0.51793	9.15262E-4					18.3372	1.34559E-5
0.44226	2.0356					0.51823	9.15262E-4					18.35	1.29054E-5
0.44253	2.18066					0.51853	9.15262E-4					18.3671	1.21721E-5
0.45526	1.29908					0.51882	9.15262E-4					18.3971	1.08956E-5
0.44053	1.58228					0.51912	9.15262E-4					18.427	9.62633E-6
0.44799	1.22622					0.51942	9.15262E-4					18.45	8.65486E-6
0.44068	8.94263					0.51972	9.15262E-4					18.4569	8.36425E-6
0.43594	3.00235					0.52001	9.15262E-4					18.4868	7.10932E-6
0.40674	2.49565					0.52031	9.15262E-4					18.5168	5.86148E-6
0.4413	0.31614					0.5205	9.15262E-4					18.5467	4.62069E-6
0.44092	1.2872					0.52061	9.15262E-4					18.55	4.48418E-6
0.43345	2.65549					0.52091	9.15262E-4					18.5766	3.3869E-6
0.45057	0.79198					0.5212	9.15262E-4					18.6066	2.16006E-6
0.44311	4.31608					0.5215	9.15262E-4					18.6365	9.4012E-7
0.44648	0.57984					0.5218	9.15262E-4					18.65	3.91561E-7
0.45586	0.75658					0.52209	9.15262E-4					18.6664	-2.72961e-07
0.46155	1.62584					0.52239	9.15262E-4					18.6963	-1.47923e-06
0.44563	1.57492					0.52269	9.15262E-4					18.7263	-2.67874e-06
0.44488	1.26064					0.52299	9.15262E-4					18.75	-3.62474e-06
0.47094	0.41735					0.52328	9.15262E-4					18.7562	-3.87153e-06
0.45293	0.30691					0.5235	9.15262E-4					18.7861	-5.05765e-06
0.43625	1.14411					0.52358	9.15262E-4					18.8161	-6.23714e-06
0.4439	1.46681					0.52388	9.15262E-4					18.846	-7.41005e-06
0.44993	1.49979					0.52418	9.15262E-4					18.85	-7.56646e-06
0.44969	1.49709					0.52447	9.15262E-4					18.8759	-8.57642e-06
0.45559	0.37295					0.52477	9.15262E-4					18.9059	-9.7363e-06
0.44584	1.46509					0.52507	9.15262E-4					18.9358	-1.08897e-05
0.44408	3.3962					0.52536	9.15262E-4					18.95	-1.14353e-05
0.43695	9.30826					0.52566	9.15262E-4					18.9657	-1.20368e-05
0.38849	8.15608					0.52596	9.15262E-4					18.9957	-1.31774e-05
0.44748	1.98714					0.52626	9.15262E-4					19.0256	-1.43118e-05
0.43483	1.67174					0.5265	9.15262E-4					19.05	-1.52328e-05
0.43463	5.03613					0.52655	9.15262E-4					19.0555	-1.54398e-05
0.4747	0.29314					0.52685	9.15262E-4					19.0854	-1.65617e-05
0.43339	1.4466					0.52715	9.15262E-4					19.1154	-1.76773e-05
0.43744	1.56701					0.52745	9.15262E-4					19.1453	-1.87868e-05
0.45201	3.07911					0.52774	9.15262E-4					19.15	-1.89606e-05
0.44597	0.99385					0.52804	9.15262E-4					19.1752	-1.98902e-05
0.4241	0.95062					0.52834	9.15262E-4					19.2052	-2.09875e-05
0.434	7.8862					0.52864	9.15262E-4					19.2351	-2.20787e-05
0.43817	1.46415					0.52893	9.15262E-4					19.25	-2.26203e-05
0.44787	0.71858					0.52923	9.15262E-4					19.265	-2.3164e-05
0.44287	4.10254					0.5295	9.15262E-4					19.2949	-2.42434e-05
0.4376	3.08225					0.52953	9.15262E-4					19.3249	-2.53168e-05
0.47995	0.24473					0.52982	9.15262E-4					19.35	-2.62134e-05
0.40164	4.84323					0.53012	9.15262E-4					19.3548	-2.63843e-05
0.45195	0.93614					0.53042	9.15262E-4					19.3847	-2.74461e-05
0.4909	0.22828					0.53072	9.15262E-4					19.4147	-2.8502e-05
0.44991	0.97662					0.53101	9.15262E-4					19.4446	-2.95522e-05
0.43858	2.96244					0.53131	9.15262E-4					19.45	-2.97412e-05
0.44358	1.84268					0.53161	9.15262E-4					19.4745	-3.05966e-05
0.43355	0.82289					0.53191	9.15262E-4					19.5044	-3.16354e-05
0.44051	0.55513					0.5322	9.15262E-4					19.5344	-3.26686e-05
0.44782	2.52161					0.5325	9.15262E-4					19.55	-3.32054e-05
0.9105	0.43302					0.5328	9.15262E-4					19.5643	-3.36961e-05
0.43771	8.95095					0.53309	9.15262E-4					19.5942	-3.47181e-05
0.36899	0.62726					0.53339	9.15262E-4					19.6242	-3.57345e-05
0.44031	3.09242					0.53369	9.15262E-4					19.65	-3.66071e-05
0.44925	0.51283					0.53399	9.15262E-4					19.6541	-3.67454e-05
0.44198	1.79018					0.53428	9.15262E-4					19.684	-3.77509e-05
0.46483	0.21878					0.53458	9.15262E-4					19.714	-3.8751e-05
0.42904	2.26254					0.53488	9.15262E-4					19.7439	-3.97456e-05
0.43575	6.02653					0.53518	9.15262E-4					19.75	-3.99479e-05
0.44152	3.01024					0.53547	9.15262E-4					19.7738	-4.07349e-05
0.44405	3.54829					0.5355	9.15262E-4					19.8038	-4.17189e-05
0.44616	0.88433					0.53577	9.15262E-4					19.8337	-4.26976e-05
0.4721	0.28421					0.53607	9.15262E-4					19.85	-4.3229e-05
0.43295	1.31898					0.53636	9.15262E-4					19.8636	-4.36711e-05
0.43675	7.15487					0.53666	9.15262E-4					19.8935	-4.46394e-05
0.436	2.26304					0.53696	9.15262E-4					19.9235	-4.56024e-05
0.43697	1.60837					0.53726	9.15262E-4					19.95	-4.64517e-05
0.4462	1.57817					0.53755	9.15262E-4					19.9534	-4.65604e-05
0.43404	2.4284					0.53785	9.15262E-4					19.9833	-4.75132e-05
0.44244	6.68707					0.53815	9.15262E-4					20.0133	-4.84609e-05
0.438	4.32836					0.53845	9.15262E-4					20.0432	-4.94036e-05
0.44641	3.93592					0.5385	9.15262E-4					20.05	-4.96172e-05
0.43776	3.61462					0.53874	9.15262E-4					20.0731	-5.03412e-05
0.43636	6.08738					0.53904	9.15262E-4					20.103	-5.12739e-05
0.43738	1.47072					0.53934	9.15262E-4					20.133	-5.22016e-05
0.44658	2.9548					0.53964	9.15262E-4					20.15	-5.27269e-05
0.42415	0.31564					0.53993	9.15262E-4					20.1629	-5.31244e-05
0.43425	0.81517					0.54023	9.15262E-4					20.1928	-5.40424e-05
0.43151	1.9816					0.54053	9.15262E-4					20.2228	-5.49554e-05
0.44494	0.93605					0.54082	9.15262E-4					20.25	-5.57818e-05
0.45224	0.22297					0.54112	9.15262E-4					20.2527	-5.58637e-05
0.43515	7.93972					0.54142	9.15262E-4					20.2826	-5.67671e-05
0.43011	6.94335					0.5415	9.15262E-4					20.3126	-5.76658e-05
0.44168	2.16057					0.54172	9.15262E-4					20.3425	-5.85597e-05
0.44639	0.82918					0.54201	9.15262E-4					20.35	-5.87832e-05
0.45402	3.87073					0.54231	9.15262E-4					20.3724	-5.9449e-05
0.44361	0.58815					0.54261	9.15262E-4					20.4023	-6.03335e-05
0.4004	0.43126					0.54291	9.15262E-4					20.4323	-6.12134e-05
0.42919	2.07611					0.5432	9.15262E-4					20.45	-6.17322e-05
0.43493	2.25127					0.5435	9.15262E-4					20.4622	-6.20888e-05
0.43057	3.7826					0.5438	9.15262E-4					20.4921	-6.29595e-05
0.4416	7.17187					0.54409	9.15262E-4					20.5221	-6.38257e-05
0.4391	1.30653					0.54439	9.15262E-4					20.55	-6.46298e-05
0.44364	8.11781					0.5445	9.15262E-4					20.552	-6.46873e-05
0.43646	2.51462					0.54469	9.15262E-4					20.5819	-6.55444e-05
0.43567	3.08588					0.54499	9.15262E-4					20.6119	-6.63971e-05
0.43722	2.37189					0.54528	9.15262E-4					20.6418	-6.72453e-05
0.44815	3.0871					0.54558	9.15262E-4					20.65	-6.74772e-05
0.43292	4.48173					0.54588	9.15262E-4					20.6717	-6.80892e-05
0.44574	1.08001					0.54618	9.15262E-4					20.7017	-6.89286e-05
0.43716	12.5489					0.54647	9.15262E-4					20.7316	-6.97637e-05
0.44213	0.78701					0.54677	9.15262E-4					20.75	-7.02754e-05
0.44235	0.44867					0.54707	9.15262E-4					20.7615	-7.05944e-05
0.45318	0.88004					0.54736	9.15262E-4					20.7914	-7.14208e-05
0.44958	1.93968					0.5475	9.15262E-4					20.8214	-7.2243e-05
0.48607	0.28062					0.54766	9.15262E-4					20.85	-7.30254e-05
0.4424	8.27047					0.54796	9.15262E-4					20.8513	-7.30609e-05
0.44699	0.84567					0.54826	9.15262E-4					20.8812	-7.38746e-05
0.44284	0.62717					0.54855	9.15262E-4					20.9112	-7.46841e-05
0.43277	8.99031					0.54885	9.15262E-4					20.9411	-7.54894e-05
0.43629	1.83579					0.54915	9.15262E-4					20.95	-7.57283e-05
0.46516	0.21216					0.54945	9.15262E-4					20.971	-7.62906e-05
0.44963	1.40447					0.54974	9.15262E-4					21.0009	-7.70876e-05
0.43437	0.9862					0.55004	9.15262E-4					21.05	-7.8385e-05
0.44378	3.25117					0.55034	9.15262E-4					21.15	-8.09964e-05
0.45135	2.11345					0.5505	9.15262E-4					21.25	-8.35636e-05
0.4117	2.64119					0.55064	9.15262E-4					21.35	-8.60873e-05
0.4509	2.28111					0.55093	9.15262E-4					21.45	-8.85685e-05
0.45339	0.58615					0.55123	9.15262E-4					21.55	-9.10081e-05
0.44803	6.26395					0.55153	9.15262E-4					21.65	-9.34069e-05
0.44546	1.19459					0.55182	9.15262E-4					21.75	-9.57657e-05
0.43312	3.67892					0.55212	9.15262E-4					21.85	-9.80852e-05
0.43597	4.55088					0.55242	9.15262E-4					21.95	-0.000100366
0.41261	1.63899					0.55272	9.15262E-4					22.05	-0.00010261
0.43199	1.48101					0.55301	9.15262E-4					22.15	-0.000104817
0.44358	0.83051					0.55331	9.15262E-4					22.25	-0.000106987
0.452	0.83241					0.5535	9.15262E-4					22.35	-0.000109122
0.45195	0.76825					0.55361	9.15262E-4					22.45	-0.000111223
0.43833	2.44048					0.55391	9.15262E-4					22.55	-0.000113289
0.43507	6.15347					0.5542	9.15262E-4					22.65	-0.000115322
0.43024	2.6569					0.5545	9.15262E-4					22.75	-0.000117322
0.43823	2.36694					0.5548	9.15262E-4					22.85	-0.00011929
0.4317	8.03477					0.55509	9.15262E-4					22.95	-0.000121226
0.42935	1.95876					0.55539	9.15262E-4					23.05	-0.000123132
0.43429	1.3397					0.55569	9.15262E-4					23.15	-0.000125007
0.49443	1.1478					0.55599	9.15262E-4					23.25	-0.000126853
0.46113	0.54031					0.55628	9.15262E-4					23.35	-0.00012867
0.43471	3.95186					0.5565	9.15262E-4					23.45	-0.000130457
0.44521	0.49452					0.55658	9.15262E-4					23.55	-0.000132217
0.42907	0.63226					0.55688	9.15262E-4					23.65	-0.00013395
0.43531	4.96421					0.55718	9.15262E-4					23.75	-0.000135655
0.4684	0.36178					0.55747	9.15262E-4					23.85	-0.000137334
0.4299	3.94382					0.55777	9.15262E-4					23.95	-0.000138987
0.43035	4.1427					0.55807	9.15262E-4					24.05	-0.000140614
0.43687	6.80725					0.55836	9.15262E-4					24.15	-0.000142216
0.45011	1.45945					0.55866	9.15262E-4					24.25	-0.000143794
0.43274	1.17388					0.55896	9.15262E-4					24.35	-0.000145347
0.46518	0.6276					0.55926	9.15262E-4					24.45	-0.000146877
0.43893	4.4053					0.5595	9.15262E-4					24.55	-0.000148384
0.43309	3.10004					0.55955	9.15262E-4					24.65	-0.000149868
0.44349	2.06481					0.55985	9.15262E-4					24.75	-0.000151329
0.4528	1.7197					0.56015	9.15262E-4					24.85	-0.000152768
0.42975	3.69124					0.56045	9.15262E-4					24.95	-0.000154186
0.43315	3.91913					0.56074	9.15262E-4					25.05	-0.000155583
0.43824	1.6505					0.56104	9.15262E-4					25.15	-0.000156958
0.4426	6.74412					0.56134	9.15262E-4					25.25	-0.000158314
0.44328	4.96624					0.56164	9.15262E-4					25.35	-0.000159649
0.48625	0.30412					0.56193	9.15262E-4					25.45	-0.000160964
0.44504	2.25723					0.56223	9.15262E-4					25.55	-0.00016226
0.47238	0.40265					0.5625	9.15262E-4					25.65	-0.000163537
0.43446	8.48682					0.56253	9.15262E-4					25.75	-0.000164796
0.44169	1.39644					0.56282	9.15262E-4					25.85	-0.000166036
0.4504	0.84427					0.56312	9.15262E-4					25.95	-0.000167258
0.44406	1.80081					0.56342	9.15262E-4					26.05	-0.000168462
0.43334	1.21159					0.56372	9.15262E-4					26.15	-0.000169648
0.44117	2.3846					0.56401	9.15262E-4					26.25	-0.000170818
0.4429	2.80819					0.56431	9.15262E-4					26.35	-0.000171971
0.43741	4.84866					0.56461	9.15262E-4					26.45	-0.000173107
0.44491	4.87167					0.56491	9.15262E-4					26.55	-0.000174227
0.45052	0.37956					0.5652	9.15262E-4					26.65	-0.000175331
0.4479	0.86197					0.5655	9.15262E-4					26.75	-0.000176419
0.44279	1.72929					0.5658	9.15262E-4					26.85	-0.000177492
0.44411	0.54092					0.56609	9.15262E-4					26.95	-0.00017855
0.44666	0.55258					0.56639	9.15262E-4					27.05	-0.000179592
0.47121	0.22389					0.56669	9.15262E-4					27.15	-0.00018062
0.46269	0.20821					0.56699	9.15262E-4					27.25	-0.000181634
0.45456	1.26972					0.56728	9.15262E-4					27.35	-0.000182633
0.45178	0.69076					0.56758	9.15262E-4					27.45	-0.000183619
0.44212	3.1391					0.56788	9.15262E-4					27.55	-0.000184591
0.43541	0.81547					0.56818	9.15262E-4					27.65	-0.000185549
0.45199	1.45175					0.56847	9.15262E-4					27.75	-0.000186494
0.44382	2.59149					0.5685	9.15262E-4					27.85	-0.000187426
0.45235	0.66918					0.56877	9.15262E-4					27.95	-0.000188346
0.42996	7.85578					0.56907	9.15262E-4					28.05	-0.000189252
0.44565	7.63525					0.56936	9.15262E-4					28.15	-0.000190147
0.44557	2.84718					0.56966	9.15262E-4					28.25	-0.000191029
0.44353	2.59472					0.56996	9.15262E-4					28.35	-0.000191899
0.45361	0.77524					0.57026	9.15262E-4					28.45	-0.000192757
0.45005	0.34836					0.57055	9.15262E-4					28.55	-0.000193604
0.45614	0.49572					0.57085	9.15262E-4					28.65	-0.000194439
0.45785	0.65187					0.57115	9.15262E-4					28.75	-0.000195263
0.4445	2.13829					0.57145	9.15262E-4					28.85	-0.000196076
0.43661	1.80314					0.5715	9.15262E-4					28.95	-0.000196878
0.4489	1.22323					0.57174	9.15262E-4					29.05	-0.00019767
0.44599	1.3489					0.5745	9.15262E-4					29.15	-0.00019845
0.44546	1.86837					0.5775	9.15262E-4					29.25	-0.000199221
0.44572	0.87048					0.5805	9.15262E-4					29.35	-0.000199981
0.44052	1.90307					0.5835	9.15262E-4					29.45	-0.000200731
0.49854	0.21954					0.5865	9.15262E-4					29.55	-0.000201472
0.43583	5.22592					0.5895	9.15262E-4					29.65	-0.000202202
0.4338	6.22786					0.5925	9.15262E-4					29.75	-0.000202924
0.43808	3.60278					0.5955	9.15262E-4					29.85	-0.000203635
0.44179	2.62492					0.5985	9.15262E-4					29.95	-0.000204338
0.4325	0.85343
0.43964	3.22166
0.44368	0.67985
0.43196	0.95094
0.44793	0.39564
0.43864	2.63958
0.44219	1.70017
0.43436	0.88001
0.44473	0.50001
0.43248	7.52406
0.46415	0.21629
0.43945	6.4954
0.43291	15.4434
0.45775	0.52097
0.45324	0.33775
0.43852	3.54673
0.44136	0.34066
0.4381	1.87673
0.45836	0.28211
0.43531	1.14513
0.43936	5.75144
0.43482	3.3635
0.43952	3.67818
0.43995	5.24764
0.43647	2.34117
0.44537	2.052
0.4504	0.76008
0.45153	0.36668
0.44315	0.98727
0.43678	2.54048
0.45104	1.05009
0.44667	0.49912
0.44415	1.76541
0.35976	0.33422
0.44304	1.88173
0.45419	3.72499
0.44199	2.97729
0.44656	0.25218
0.44612	1.27296
0.44516	7.51874
0.47095	0.28742
0.44735	1.88426
0.43578	7.0676
0.43349	2.38653
0.45708	0.73406
0.45163	0.56402
0.43834	0.7518
0.44489	1.12868
0.46006	0.51972
0.44892	0.69627
0.44044	0.49205
0.44995	4.03144
0.44525	1.41669
0.44085	2.2889
0.43602	12.4976
0.43962	1.8935
0.46374	0.34488
0.44332	1.3763
0.45018	1.4323
0.44499	3.11549
0.44954	0.49573
0.44084	2.25888
0.60267	0.40446
0.93939	0.65223
0.44925	1.2918
0.46152	0.87169
0.43317	6.38968
0.45126	5.187
0.45918	0.5916
0.43728	7.80099
0.43883	2.36725
0.43715	7.2677
0.43993	5.5323
0.44277	1.93511
0.43412	3.37447
0.44742	1.40321
0.42716	2.8642
0.43205	6.44105
0.43821	1.11489
0.4458	7.50839
0.44668	0.94988
0.44954	2.70997
0.45421	0.95073
0.43244	2.49472
0.4275	5.84886
0.44501	1.68385
0.44267	2.71701
0.43128	4.73653
0.44166	5.60052
0.12467	0.58041
0.43513	1.53616
0.43151	3.74771
0.44224	3.41213
0.43308	4.53561
0.43461	3.61146
0.44531	2.07236
0.43299	10.0819
0.48924	0.27836
0.44425	1.90855
0.43718	1.45986
0.43819	1.67836
0.44057	2.5565
0.44521	2.09919
0.44114	0.76284
0.44928	1.33587
0.44133	1.2622
0.43671	1.71988
0.4471	6.58737
0.43104	3.04987
0.44554	2.28145
0.44022	4.89859
0.44662	3.09387
0.45814	0.42885
0.42968	5.25121
0.45524	0.69611
0.44732	1.15372
0.43994	2.95025
0.423	1.72312
0.43663	4.03922
0.42731	2.51765
0.43872	3.83648
0.3944	1.65116
0.45771	0.50366
0.44957	0.81168
0.46047	0.85602
0.42565	0.92786
0.44514	3.06129
0.43632	5.31317
0.44972	1.68857
0.44223	1.81964
0.41568	0.69395
0.47655	0.3585
0.44846	2.14666
0.45303	0.2794
0.43012	3.72728
0.44913	1.40912
0.4732	0.28874
0.43714	4.27796
0.45093	0.73736
0.4373	1.30074
0.43223	0.55532
0.4416	0.77399
0.44664	1.98767
0.42161	4.54933
0.43942	3.26667
0.44472	0.72773
0.42854	7.5987
0.43891	1.71811
0.44507	2.37021
0.43003	6.92439
0.45112	3.09518
0.33142	0.36028
0.39904	2.64026
0.44184	2.7812
0.44174	2.51062
0.45833	0.76365
0.4484	0.71515
0.118	0.20934
0.43956	9.30739
0.47455	0.32403
0.44395	5.66841
0.44828	1.24245
0.4601	1.06448
0.43846	4.00343
0.44697	3.58598
0.43152	1.91361
0.43745	5.59557
0.43238	6.81666
0.42717	3.72757
0.44917	3.14027
0.45666	1.79443
0.4444	3.8958
0.44695	2.42618
0.43927	1.36769
0.43768	4.58692
0.42663	1.32118
0.40186	4.45094
0.44305	4.83804
0.44482	3.34396
0.44579	1.11811
0.43371	2.34326
0.43768	1.89453
0.44465	1.3682
0.43988	4.76885
0.43966	13.1212
0.4521	2.76739
0.43509	4.60613
0.44977	1.13112
0.44309	3.53306
0.44678	0.48382
0.45143	5.14588
0.46325	0.57827
0.44005	3.07769
0.43549	1.63794
0.47799	0.27414
0.43874	0.77093
0.44989	0.94518
0.44672	1.30698
0.43993	1.67
0.44277	2.3217
0.42851	2.68686
0.46419	0.49725
0.43483	0.71147
0.44097	1.20174
0.42706	3.02142
0.43373	3.6258
0.44576	0.43146
0.45079	1.14274
0.43863	2.70994
0.43806	4.83827
0.43634	3.31049
0.42389	5.65907
0.45586	0.5223
0.45426	2.66103
0.44648	2.96869
0.43106	2.22628
0.44884	0.2505
0.44652	0.96614
0.43536	6.11128
0.43413	0.6843
0.44927	0.79496
0.43861	2.23197
0.46175	0.45516
0.44306	1.62578
0.42879	1.18524
0.43625	3.64586
0.43533	6.09881
0.43466	2.44126
0.4439	1.92274
0.4376	2.90266
0.41335	0.75501
0.46351	0.55394
0.44628	2.37297
0.45042	0.89109
0.4424	1.42412
0.44028	2.15105
0.44254	0.60505
0.43518	4.74861
0.44425	1.83053
0.43919	4.78637
0.44104	7.19021
0.44762	0.8482
0.431	0.7362
0.45315	0.57141
0.43464	5.06636
0.43977	5.55616
0.43513	4.68563
0.44426	0.37934
0.44228	1.60051
0.44756	0.8885
0.45061	6.22283
0.44174	3.78316
0.44439	3.04423
0.43919	8.47653
0.43047	1.72955
0.42601	6.61954
0.44691	1.58837
0.4522	0.7529
0.44275	1.67069
0.43376	7.09605
0.44554	0.88814
0.44262	2.0463
0.45079	2.47368
0.46059	0.60651
0.44474	1.72705
0.42788	2.4105
0.44665	0.59726
0.43289	1.17196
0.45456	0.8887
0.44908	0.61169
0.43778	4.9483
0.43649	1.66366
0.44033	7.00467
0.43829	6.30412
0.44728	3.75894
0.43471	15.0001
0.46761	0.42259
0.43419	4.051
0.45282	1.50316
0.44417	0.83472
0.45408	0.55466
0.44552	1.79958
0.44225	4.51421
0.43105	4.33018
0.44422	1.02262
0.44364	6.9161
0.43596	0.49652
0.45345	1.69938
0.44516	5.67873
0.43183	2.68715
0.43674	7.19121
0.4473	0.50863
0.34215	3.41848
0.43274	1.86104
0.45702	0.68354
0.43636	2.30801
0.43322	4.27578
0.4555	0.83473
0.44394	2.90015
0.4484	6.45119
0.43054	1.91491
0.43122	2.71581
0.454	1.59077
0.44573	7.06836
0.44246	0.79247
0.44876	1.89904
0.43721	3.20234
0.42901	1.72399
0.44174	1.48646
0.44696	4.4728
0.43666	18.5079
0.43384	5.44557
0.44746	1.59302
0.43252	1.1301
0.43505	12.3123
0.42968	0.25881
0.44356	1.47884
0.45389	1.88498
0.45937	0.36668
0.90151	0.27283
0.43397	3.41483
0.40634	4.0034
0.44261	4.34998
0.47075	0.38843
0.43699	2.26911
0.4326	2.27062
0.4486	1.15222
0.43882	2.42511
0.43596	1.21405
0.42816	2.41199
0.43903	2.91264
0.43145	3.48583
0.43617	4.6493
0.44872	1.30095
0.44636	1.21702
0.43851	2.95954
0.45826	1.31199
0.44188	5.33659
0.41936	2.28834
0.42832	3.22722
0.44195	2
0.42622	1.54849
0.43277	5.7661
0.43607	2.44111
0.43816	1.68043
0.44741	1.95579
0.43736	0.48466
0.44356	4.93681
0.45845	0.40474
0.43507	13.0143
0.4521	0.93121
0.45282	0.63231
0.43299	9.72744
0.43468	0.9587
0.40685	5.81348
0.44378	7.55473
0.43963	4.12344
0.4405	1.60381
0.44837	0.88192
0.44852	4.09597
0.44374	7.07216
0.44431	0.9956
0.43404	3.72832
0.44377	4.79276
0.50211	0.20503
0.47258	0.21433
0.45575	0.96174
0.46116	0.51371
0.53627	4.03752
0.44893	0.60871
0.44847	1.12371
0.43336	0.47248
0.44459	2.67628
0.48513	0.23253
0.44175	4.1795
0.42678	6.70301
0.4328	2.39848
0.44936	2.68102
0.47867	0.23399
0.43921	6.59571
0.43815	2.73541
0.43235	6.60263
0.42639	1.98862
0.44654	10.1336
0.54303	0.24098
0.44472	3.35766
0.44829	0.50066
0.44826	1.10731
0.46717	0.39219
0.43354	0.98302
0.43428	1.11752
0.43773	1.41432
0.44445	3.36939
0.44632	3.09832
0.44262	0.62239
0.44319	0.34418
0.43969	2.28006
0.44285	5.53218
0.43307	1.26871
0.43455	4.06073
0.44566	2.59918
0.43949	1.56272
0.43727	6.51173
0.43561	6.61193
0.439	1.66194
0.44517	2.94298
0.43041	2.04132
0.4526	2.15379
0.43717	4.62644
0.45475	0.66448
0.4436	0.65893
0.44994	7.03457
0.43932	1.87818
0.43947	1.76266
0.42911	1.41411
0.44184	4.20572
0.43012	4.01002
0.43198	3.11826
0.44655	3.11909
0.44535	2.10228
0.43331	0.70437
0.44733	1.17703
0.43773	3.09785
0.43795	0.75656
0.44209	6.57983
0.43733	6.89513
0.45976	0.65641
0.42986	0.64611
0.43054	4.33139
0.43617	4.1043
0.43752	1.65742
0.45404	1.38714
0.43988	4.78673
0.47267	0.48243
0.44386	3.12713
0.47391	1.02416
0.42922	5.89374
0.43599	1.50588
0.43338	3.20929
0.43837	1.71915
0.43571	7.09115
0.45932	0.30643
0.43754	2.17959
0.44672	0.44328
0.42542	1.37282
0.43296	8.36644
0.44807	1.93558
0.44274	1.47495
0.44711	1.26971
0.44026	1.78851
0.43585	5.65469
0.43017	3.24049
0.44169	3.34979
0.43837	4.85082
0.44108	1.54007
0.41232	7.3677
0.47269	0.30406
0.45018	6.90853
0.44082	3.32368
0.42914	5.16091
0.45413	1.67513
0.44041	2.10829
0.43539	0.99257
0.44587	1.26693
0.44664	1.49159
0.44601	0.68807
0.42278	1.38203
0.43929	1.14812
0.43252	4.63331
0.43257	1.72544
0.45533	0.52309
0.45871	0.31381
0.44126	0.74717
0.46739	0.20349
0.43647	6.05183
0.44935	4.20097
0.4412	2.976
0.43558	3.18788
0.46217	0.98011
0.40884	4.90772
0.43941	1.08386
0.44352	3.23179
0.43067	2.0943
0.4477	0.42198
0.43656	1.05969
0.43558	2.29186
0.43123	3.34678
0.43109	2.03092
0.48277	0.39855
0.42299	1.19784
0.43137	0.45074
0.42925	0.42353
0.43999	1.9241
0.44652	1.68342
0.38061	202.557
0.44928	0.20023
0.43906	1.06115
0.43107	1.05791
0.46756	0.41432
0.4428	4.33564
0.44533	2.0202
0.43854	2.28214
0.43129	1.72523
0.48771	0.26202
0.442	5.73006
0.43978	3.40039
0.46224	0.88906
0.45331	3.94268
0.45083	0.54078
0.45707	0.71595
0.45346	4.22709
0.44242	10.4196
0.44376	1.99512
0.44884	2.94672
0.38992	3.79926
0.45093	0.74056
0.4459	1.8363
0.44158	8.49656
0.43989	1.84242
0.44889	3.24608
0.45608	0.46926
0.43557	1.87219
0.43864	10.8271
0.45226	2.44214
0.45337	5.09879
0.44062	2.32419
0.4512	0.88076
0.44986	0.59258
0.43447	3.60618
0.44755	0.77387
0.439	0.53484
0.46952	0.34143
0.46623	0.79098
0.45139	1.57198
0.35182	1.95722
0.43863	1.04351
0.49176	0.2799
0.44852	0.67223
0.43334	6.14461
0.45162	3.70313
0.4409	1.84691
0.45517	0.76473
0.44749	1.41176
0.45276	1.25269
0.44682	3.31613
0.45214	0.52844
0.43896	3.20054
0.43188	1.32365
0.44029	6.93634
0.40897	5.12933
0.45767	0.44423
0.41043	7.24775
0.44645	2.38099
0.43529	1.96918
0.44704	7.34981
0.44536	1.56858
0.44484	2.98833
0.45089	5.10291
0.43855	1.26168
0.45603	1.50975
0.44172	1.60631
0.45075	2.17806
0.44389	1.81133
0.44009	9.27898
0.43749	1.06869
0.44104	1.23238
0.43744	2.84418
0.43858	2.72448
0.44175	3.37561
0.46228	0.62631
0.45426	7.45751
0.43644	1.80675
0.43799	1.07632
0.44049	1.44575
0.43585	9.76856
0.4439	2.89984
0.44543	4.40471
0.46063	1.61232
0.4398	3.22403
0.43552	2.83845
0.46351	0.56084
0.44566	1.7695
0.44678	1.94845
0.44724	0.38148
0.44143	0.58713
0.44633	3.83512
0.45033	3.04107
0.45878	2.52302
0.44299	1.65282
0.44319	2.09784
0.43356	3.13438
0.44239	1.51931
0.45545	2.76029
0.44822	1.14024
0.43689	3.16647
0.44642	7.0161
0.44195	4.27197
0.45192	0.77031
0.45181	3.58826
0.44441	1.29801
0.44162	6.19204
0.45254	4.52966
0.44463	6.18866
0.45973	1.55144
0.44029	6.19508
0.46581	0.58085
0.43211	1.67992
0.43986	7.70609
0.46551	0.6161
0.44339	1.65906
0.46485	0.35351
0.44337	1.53631
0.45455	0.93901
0.43329	14.1613
0.44539	0.90401
0.46084	3.15713
0.44671	0.39692
0.43596	1.59197
0.43915	5.59692
0.43678	3.18736
0.46859	0.57483
0.44813	1.57197
0.45321	1.29365
0.47276	0.26395
0.44116	5.92035
0.44396	1.39479
0.43588	4.41311
0.43909	2.88955
0.45049	4.36558
0.44785	0.43988
0.44125	5.92553
0.46179	6.28355
0.45061	2.94715
0.44255	1.32671
0.44744	1.41673
0.46101	1.49569
0.4474	1.79756
0.45075	0.62847
0.45567	0.33074
0.44222	3.28056
0.44303	2.68832
0.43869	3.55256
0.43346	5.65835
0.47151	0.39934
0.43772	1.18673
0.44661	4.54898
0.45545	5.31571
0.45056	7.06051
0.44433	1.01471
0.43945	3.92107
0.4687	0.5296
0.43979	5.16866
0.43768	6.24211
0.44671	5.67697
0.45007	1.35951
0.4411	3.77361
0.44262	1.836
0.44783	9.05254
0.45061	1.70717
0.46443	3.38895
0.45415	1.17974
0.45293	0.83572
0.45407	0.94385
0.43349	2.94287
0.45561	0.57045
0.46432	0.84621
0.44133	1.08071
0.43591	2.77064
0.44451	5.33174
0.44226	2.30312
0.4354	2.55362
0.44417	1.08004
0.45628	0.59847
0.44532	1.32126
0.42799	0.76623
0.45134	1.49657
0.46722	0.22869
0.43379	2.24206
0.43819	3.04184
0.40967	2.77061
0.44624	1.12234
0.44319	3.95349
0.44821	9.01183
0.4349	2.30083
0.1999	333.786
0.45676	7.58754
0.43996	1.48447
0.43117	0.91917
0.46871	0.30434
0.45306	1.61147
0.44156	0.67588
0.43591	3.92862
0.45232	0.56775
0.45336	2.28746
0.45738	0.98387
0.45251	2.04147
0.4566	0.68965
0.43428	0.75041
0.52744	0.22389
0.45153	0.30742
0.43034	3.86736
0.45027	1.12053
0.43927	4.07958
0.49237	0.21646
0.44424	3.32401
0.43773	7.42848
0.4892	0.21599
0.45149	1.40494
0.44576	1.43781
0.45003	4.25652
0.43395	1.6399
0.44477	2.46643
0.4571	1.70962
0.43928	2.59839
0.44241	0.65893
0.45746	0.51193
0.41236	5.80641
0.4549	4.3246
0.43803	2.70317
0.39339	5.29874
0.45398	0.59983
0.4427	8.99328
0.45032	3.64668
0.46317	0.77454
0.45502	2.28116
0.44823	2.02319
0.44067	3.91837
0.44169	8.67107
0.43919	6.08326
0.44585	5.85175
0.4412	1.07655
0.44415	2.27048
0.44299	2.59888
0.4624	0.49939
0.43496	2.07131
0.45517	1.4121
0.43795	2.55714
0.43669	1.76639
0.44072	2.01971
0.44078	7.17026
0.4577	0.98773
0.4475	2.19869
0.44989	2.17596
0.37566	0.28521
0.44334	0.35564
0.45206	1.69969
0.4405	4.03128
0.43108	2.87221
0.44157	5.76642
0.44144	3.61508
0.45702	0.3843
0.4369	3.02683
0.44872	2.48354
0.44671	3.03104
0.44454	1.22816
0.43104	1.01159
0.43924	2.53962
0.45168	2.13232
0.44432	6.41637
0.44631	0.89459
0.43817	4.91221
0.4673	0.59258
0.45827	1.11751
0.44853	2.98205
0.4517	2.30473
0.44463	3.99853
0.44514	3.8645
0.44397	2.46607
0.45259	0.96002
0.45143	4.92991
0.46716	0.41953
0.42027	15.4087
0.42879	0.68097
0.4499	1.81661
0.43572	4.15622
0.44796	2.92011
0.45561	1.91589
0.45249	13.0093
0.44639	1.02363
0.43611	5.50867
0.43727	3.64079
0.44024	5.52675
0.46298	0.58475
0.44042	1.32021
0.44147	0.78935
0.50641	0.44497
0.44264	1.90487
0.43956	1.67967
0.43674	2.8709
0.46998	0.40453
0.45695	0.49877
0.44902	0.27627
0.43152	2.3729
0.44412	3.02467
0.4383	2.18964
0.43598	5.20645
0.47166	0.26982
0.44791	7.39457
0.44826	3.02441
0.45055	0.77969
0.43955	5.18189
0.43438	0.95524
0.43964	3.09085
0.44629	5.81859
0.46961	1.71978
0.44032	5.64254
0.44764	0.81612
0.45942	0.42078
0.4333	5.31701
0.44299	5.35892
0.44522	1.1043
0.44696	4.63871
0.46009	1.34017
0.43805	1.7989
0.44065	0.81958
0.49079	0.26488
0.44836	2.11896
0.44642	1.99279
0.45373	5.70035
0.44411	4.352
0.44147	9.34493
0.44285	2.6126
0.44879	2.07632
0.45147	0.68269
0.44593	2.03211
0.4403	4.6445
0.4478	0.75325
0.44648	0.49484
0.44163	12.7839
0.44787	1.71156
0.43987	11.7995
0.43591	5.91053
0.09481	0.20064
0.39306	3.81952
0.45783	2.7881
0.43337	0.47527
0.43781	0.28333
0.44094	6.16511
0.40791	3.56831
0.44995	1.40348
0.43551	2.7998
0.4429	2.25135
0.44945	2.05924
0.45451	0.60225
0.45031	2.50123
0.42716	4.77452
0.44675	3.27851
0.44047	1.95632
0.44657	1.15409
0.44386	2.80387
0.44417	1.07072
0.4527	0.77703
0.45899	1.08703
0.43673	0.77016
0.42902	2.40174
0.44553	2.78976
0.44876	0.53444
0.4624	1.057
0.43928	4.65957
0.44054	1.07241
0.44535	1.99436
0.44613	3.95068
0.44668	1.89458
0.4648	0.74806
0.45155	5.36407
0.44748	2.38632
0.44058	3.41487
0.44801	1.2828
0.43938	2.93071
0.45296	0.68242
0.43044	1.71944
0.42416	5.95015
0.45494	0.83855
0.4703	0.30264
0.42896	5.04308
0.4317	2.14585
0.46203	0.22273
0.46725	0.56772
0.44118	2.32256
0.46749	0.28535
0.43308	6.67866
0.4551	2.76543
0.44715	1.96682
0.4481	0.95591
0.44456	5.66598
0.44213	5.79811
0.43225	5.31375
0.43516	5.55107
0.45067	5.20518
0.45805	0.60033
0.44005	0.54109
0.45222	1.11321
0.45297	0.76489
0.43315	4.82283
0.44266	1.11421
0.45894	0.7004
0.43926	6.40419
0.45012	4.09978
0.42855	3.35938
0.43285	7.39375
0.4488	4.04654
0.48236	0.22811
0.45485	0.66842
0.44315	1.96015
0.44868	11.8786
0.3921	0.36099
0.4442	0.73814
0.44761	0.352
0.49829	4.62554
0.44075	3.45353
0.43745	2.57209
0.45366	1.96103
0.45321	1.73421
0.45095	5.56091
0.44236	1.58368
0.4408	1.63883
0.46134	1.66908
0.43946	1.19869
0.44068	1.64837
0.43607	3.20026
0.45245	0.86979
0.4352	10.5429
0.44724	2.99494
0.44419	2.19326
0.43968	4.69267
0.44542	1.8576
0.44498	1.77683
0.44012	3.89242
0.45338	4.92388
0.43258	0.23348
0.45863	0.617
0.44656	1.99498
0.44106	3.16615
0.46284	1.20035
0.46438	0.56651
0.46381	0.51108
0.42462	1.95268
0.44355	6.23692
0.44699	4.72907
0.47083	0.92246
0.4407	4.94264
0.44436	6.38495
0.4417	7.30703
0.44434	2.61415
0.44911	1.14263
0.43961	3.47251
0.44369	0.60904
0.43361	3.1965
0.44818	2.37203
0.45989	0.53586
0.44244	0.95212
0.43537	3.5155
0.43692	1.88527
0.452	1.50445
0.43683	1.5731
0.44339	4.46432
0.45129	1.52023
0.4591	4.06616
0.45565	1.09097
0.43994	8.39007
0.44148	1.38766
0.44139	1.42059
0.44582	2.44317
0.44919	1.5368
0.41154	4.73557
0.43527	1.27304
0.44523	1.12583
0.45833	0.44461
0.44747	0.65128
0.43579	1.20108
0.44335	4.48853
0.44871	0.79445
0.44283	0.25104
0.45341	0.23026
0.4656	0.30605
0.44689	7.58323
0.44712	2.73711
0.47682	0.33355
0.5787	0.26727
0.45658	0.97496
0.44041	3.9526
0.39878	0.20298
0.38146	0.20083
0.43591	13.7966
0.45055	1.71573
0.44844	0.7522
0.45351	1.51604
0.43769	0.41314
0.44122	1.8343
0.46253	1.65725
0.48944	0.26905
0.44217	3.05602
0.47052	0.27428
0.45426	2.81255
0.443	2.10807
0.43362	4.31493
0.45148	0.77936
0.44411	2.84476
[truncated: 9,495 more rows]

## Sheet: Fig. 5i
H31-10K9(Me3) Scatter			BlockDepth histogram			Gaussian-fitting for BlockDepth			Restime histogram			LogNormal-fitting for Restime
BlockDepth	Restime (ms)		BlockDepth	Relative counts		BlockDepth	Relative counts		Restime (ms)	Relative counts		Restime (ms)	Relative counts
0.43034	0.48965		0.3015	0		0.3015	8.52436E-4		0.05	0		0.05	0.00481
0.42369	4.56916		0.3045	0		0.30209	8.52436E-4		0.15	0		0.07993	0.00961
0.42611	0.61316		0.3075	1.14639E-4		0.30239	8.52436E-4		0.25	0.04533		0.10986	0.01396
0.38833	6.56728		0.3105	0		0.30269	8.52436E-4		0.35	0.03741		0.13979	0.01767
0.41908	0.32226		0.3135	5.73197E-5		0.30299	8.52436E-4		0.45	0.0347		0.15	0.01879
0.42202	5.4873		0.3165	5.73197E-5		0.30328	8.52436E-4		0.55	0.03166		0.16972	0.02075
0.42028	1.58259		0.3195	5.73197E-5		0.30358	8.52436E-4		0.65	0.02867		0.19965	0.02328
0.42283	1.0196		0.3225	0		0.30388	8.52436E-4		0.75	0.02889		0.22958	0.02533
0.4215	6.97082		0.3255	0		0.30418	8.52436E-4		0.85	0.02656		0.25	0.0265
0.42193	5.45347		0.3285	1.14639E-4		0.30447	8.52436E-4		0.95	0.02623		0.25951	0.02699
0.42077	9.19197		0.3315	1.71959E-4		0.3045	8.52436E-4		1.05	0.02308		0.28944	0.02831
0.42007	6.47509		0.3345	2.86599E-4		0.30477	8.52436E-4		1.15	0.0259		0.31937	0.02936
0.4357	2.97941		0.3375	0		0.30507	8.52436E-4		1.25	0.0223		0.3493	0.03018
0.41688	1.54627		0.3405	1.14639E-4		0.30536	8.52436E-4		1.35	0.02347		0.35	0.03019
0.42844	1.59579		0.3435	5.73197E-5		0.30566	8.52436E-4		1.45	0.02081		0.37923	0.0308
0.43155	2.03059		0.3465	1.71959E-4		0.30596	8.52436E-4		1.55	0.02053		0.40916	0.03127
0.42074	1.4322		0.3495	1.14639E-4		0.30626	8.52436E-4		1.65	0.01876		0.43909	0.0316
0.42703	4.78275		0.3525	1.71959E-4		0.30655	8.52436E-4		1.75	0.02136		0.45	0.03169
0.41563	1.96678		0.3555	5.73197E-5		0.30685	8.52436E-4		1.85	0.01638		0.46902	0.03181
0.42779	3.40533		0.3585	1.14639E-4		0.30715	8.52436E-4		1.95	0.01716		0.49895	0.03193
0.41627	2.29136		0.3615	0		0.30745	8.52436E-4		2.05	0.01865		0.52888	0.03196
0.42048	3.13509		0.3645	3.43918E-4		0.3075	8.52436E-4		2.15	0.01544		0.55	0.03195
0.4293	3.20876		0.3675	1.14639E-4		0.30774	8.52436E-4		2.25	0.01533		0.55881	0.03193
0.42401	12.7586		0.3705	4.01238E-4		0.30804	8.52436E-4		2.35	0.01456		0.58874	0.03184
0.43525	1.2747		0.3735	4.58558E-4		0.30834	8.52436E-4		2.45	0.01572		0.61867	0.03171
0.42827	1.2104		0.3765	4.01238E-4		0.30864	8.52436E-4		2.55	0.01356		0.6486	0.03153
0.4186	1.79625		0.3795	2.86599E-4		0.30893	8.52436E-4		2.65	0.01616		0.65	0.03152
0.46476	0.20621		0.3825	8.02476E-4		0.30923	8.52436E-4		2.75	0.01278		0.67853	0.03131
0.4315	0.85993		0.3855	0.00132		0.30953	8.52436E-4		2.85	0.01295		0.70846	0.03107
0.41725	1.46668		0.3885	0.00138		0.30982	8.52436E-4		2.95	0.01334		0.73839	0.0308
0.41975	7.62539		0.3915	0.00178		0.31012	8.52436E-4		3.05	0.01389		0.75	0.03069
0.4292	7.44655		0.3945	0.00189		0.31042	8.52436E-4		3.15	0.01135		0.76832	0.03052
0.4313	12.9111		0.3975	0.00229		0.3105	8.52436E-4		3.25	0.0109		0.79825	0.03021
0.41746	3.68247		0.4005	0.00218		0.31072	8.52436E-4		3.35	0.01245		0.82818	0.0299
0.42112	9.06386		0.4035	0.00172		0.31101	8.52436E-4		3.45	0.00985		0.85	0.02966
0.423	0.39468		0.4065	0.00264		0.31131	8.52436E-4		3.55	0.00991		0.85811	0.02957
0.41404	2.51155		0.4095	0.00396		0.31161	8.52436E-4		3.65	0.00885		0.88804	0.02923
0.4184	3.95933		0.4125	0.00974		0.31191	8.52436E-4		3.75	0.00974		0.91797	0.02889
0.4243	3.10014		0.4155	0.02218		0.3122	8.52436E-4		3.85	0.00913		0.9479	0.02854
0.41931	1.03367		0.4185	0.05405		0.3125	8.52436E-4		3.95	0.00919		0.95	0.02852
0.42552	5.93565		0.4215	0.09641		0.3128	8.52436E-4		4.05	0.00963		0.97783	0.02819
0.41988	12.4434		0.4245	0.14106		0.31309	8.52436E-4		4.15	0.00885		1.00776	0.02783
0.35967	5.28162		0.4275	0.15402		0.31339	8.52436E-4		4.25	0.00802		1.03769	0.02748
0.42734	0.87141		0.4305	0.15058		0.3135	8.52436E-4		4.35	0.00775		1.05	0.02733
0.42917	0.98831		0.4335	0.11303		0.31369	8.52436E-4		4.45	0.00858		1.06762	0.02712
0.44054	0.59411		0.4365	0.07887		0.31399	8.52436E-4		4.55	0.00775		1.09755	0.02677
0.42857	1.68585		0.4395	0.05113		0.31428	8.52436E-4		4.65	0.00636		1.12748	0.02641
0.42833	0.5231		0.4425	0.02918		0.31458	8.52436E-4		4.75	0.00703		1.15	0.02615
0.41878	1.9038		0.4455	0.02012		0.31488	8.52436E-4		4.85	0.00697		1.15741	0.02606
0.42599	16.863		0.4485	0.01227		0.31518	8.52436E-4		4.95	0.00753		1.18734	0.02571
0.41803	11.813		0.4515	0.0082		0.31547	8.52436E-4		5.05	0.00625		1.21727	0.02536
0.42529	1.03533		0.4545	0.00728		0.31577	8.52436E-4		5.15	0.00576		1.2472	0.02501
0.41991	3.46149		0.4575	0.00459		0.31607	8.52436E-4		5.25	0.00526		1.25	0.02498
0.41029	0.94603		0.4605	0.0039		0.31636	8.52436E-4		5.35	0.0052		1.27713	0.02467
0.42556	9.05409		0.4635	0.00315		0.3165	8.52436E-4		5.45	0.00537		1.30706	0.02433
0.41531	4.0836		0.4665	0.0031		0.31666	8.52436E-4		5.55	0.00509		1.33699	0.024
0.42969	2.72309		0.4695	0.0016		0.31696	8.52436E-4		5.65	0.00559		1.35	0.02385
0.42044	4.52835		0.4725	0.0016		0.31726	8.52436E-4		5.75	0.00493		1.36692	0.02367
0.43159	1.66873		0.4755	8.59796E-4		0.31755	8.52436E-4		5.85	0.00537		1.39685	0.02334
0.42862	6.86172		0.4785	8.59796E-4		0.31785	8.52436E-4		5.95	0.00443		1.42678	0.02302
0.41789	3.84248		0.4815	8.59796E-4		0.31815	8.52436E-4		6.05	0.00448		1.45	0.02277
0.38255	4.13851		0.4845	7.45156E-4		0.31845	8.52436E-4		6.15	0.00448		1.45671	0.0227
0.42253	0.62705		0.4875	6.30517E-4		0.31874	8.52436E-4		6.25	0.00426		1.48664	0.02238
0.43414	1.41286		0.4905	4.58558E-4		0.31904	8.52436E-4		6.35	0.00376		1.51657	0.02208
0.42792	3.64284		0.4935	5.15878E-4		0.31934	8.52436E-4		6.45	0.00454		1.5465	0.02177
0.42907	0.20195		0.4965	2.86599E-4		0.3195	8.52436E-4		6.55	0.00432		1.55	0.02174
0.43426	3.91894		0.4995	5.73197E-4		0.31964	8.52436E-4		6.65	0.00338		1.57643	0.02147
0.42375	4.79154		0.5025	1.14639E-4		0.31993	8.52436E-4		6.75	0.00415		1.60636	0.02117
0.42179	6.55204		0.5055	1.14639E-4		0.32023	8.52436E-4		6.85	0.00371		1.63629	0.02088
0.41876	4.69843		0.5085	1.71959E-4		0.32053	8.52436E-4		6.95	0.00398		1.65	0.02075
0.42188	1.87373		0.5115	1.14639E-4		0.32082	8.52436E-4		7.05	0.00299		1.66622	0.0206
0.42322	2.07942		0.5145	5.73197E-5		0.32112	8.52436E-4		7.15	0.00371		1.69615	0.02031
0.42733	2.7438		0.5175	0		0.32142	8.52436E-4		7.25	0.00282		1.72608	0.02004
0.42322	6.47224		0.5205	0		0.32172	8.52436E-4		7.35	0.00277		1.75	0.01982
0.42613	1.64232		0.5235	1.71959E-4		0.32201	8.52436E-4		7.45	0.00376		1.75601	0.01976
0.44198	0.47142		0.5265	0		0.32231	8.52436E-4		7.55	0.00343		1.78594	0.01949
0.43137	2.45498		0.5295	5.73197E-5		0.3225	8.52436E-4		7.65	0.00194		1.81587	0.01923
0.4258	1.28026		0.5325	5.73197E-5		0.32261	8.52436E-4		7.75	0.00299		1.8458	0.01897
0.43308	2.44368		0.5355	5.73197E-5		0.32291	8.52436E-4		7.85	0.00194		1.85	0.01893
0.42691	0.8833		0.5385	2.86599E-4		0.3232	8.52436E-4		7.95	0.0021		1.87573	0.01871
0.43045	1.68895		0.5415	0		0.3235	8.52436E-4		8.05	0.00255		1.90566	0.01846
0.42781	0.91116		0.5445	5.73197E-5		0.3238	8.52436E-4		8.15	0.00271		1.93559	0.01822
0.42508	2.7635		0.5475	3.43918E-4		0.32409	8.52436E-4		8.25	0.00194		1.95	0.0181
0.41533	3.87365		0.5505	4.01238E-4		0.32439	8.52436E-4		8.35	0.00183		1.96552	0.01797
0.41841	4.12456		0.5535	2.29279E-4		0.32469	8.52436E-4		8.45	0.00199		1.99545	0.01773
0.41678	4.03758		0.5565	4.58558E-4		0.32499	8.52436E-4		8.55	0.00199		2.02538	0.0175
0.395	2.35999		0.5595	2.29279E-4		0.32528	8.52436E-4		8.65	0.00188		2.05	0.01731
0.42027	2.03266		0.5625	1.71959E-4		0.3255	8.52436E-4		8.75	0.00188		2.05531	0.01727
0.42219	3.59238		0.5655	1.71959E-4		0.32558	8.52436E-4		8.85	0.00188		2.08524	0.01704
0.42724	4.84029		0.5685	1.14639E-4		0.32588	8.52436E-4		8.95	0.0016		2.11517	0.01681
0.42343	3.8139		0.5715	3.43918E-4		0.32618	8.52436E-4		9.05	0.00138		2.1451	0.01659
0.43644	1.8373		0.5745	5.73197E-5		0.32647	8.52436E-4		9.15	0.00177		2.15	0.01656
0.41266	3.23931		0.5775	5.73197E-5		0.32677	8.52436E-4		9.25	0.0016		2.17503	0.01638
0.41982	10.0602		0.5805	0		0.32707	8.52436E-4		9.35	0.00127		2.20495	0.01617
0.4335	0.71515		0.5835	1.14639E-4		0.32736	8.52436E-4		9.45	0.00133		2.23488	0.01596
0.42889	2.26533		0.5865	1.71959E-4		0.32766	8.52436E-4		9.55	0.00116		2.25	0.01585
0.43177	2.25573		0.5895	0		0.32796	8.52436E-4		9.65	0.00149		2.26481	0.01575
0.40978	1.319		0.5925	1.14639E-4		0.32826	8.52436E-4		9.75	0.00116		2.29474	0.01555
0.4361	7.85551		0.5955	2.29279E-4		0.3285	8.52436E-4		9.85	0.00144		2.32467	0.01535
0.37485	4.01204		0.5985	5.73197E-5		0.32855	8.52436E-4		9.95	0.00111		2.35	0.01518
0.43185	4.71446					0.32885	8.52436E-4		10.05	0.00221		2.3546	0.01515
0.42189	3.00696					0.32915	8.52436E-4		10.15	8.85494E-4		2.38453	0.01496
0.42461	1.12341					0.32945	8.52436E-4		10.25	0.00127		2.41446	0.01477
0.41876	7.51947					0.32974	8.52436E-4		10.35	0.00116		2.44439	0.01459
0.41398	8.47779					0.33004	8.52436E-4		10.45	0.00105		2.45	0.01455
0.41937	5.55373					0.33034	8.52436E-4		10.55	0.00111		2.47432	0.0144
0.4358	4.16734					0.33064	8.52436E-4		10.65	9.40838E-4		2.50425	0.01422
0.42916	0.74814					0.33093	8.52436E-4		10.75	0.00105		2.53418	0.01405
0.43139	2.51961					0.33123	8.52436E-4		10.85	4.98091E-4		2.55	0.01396
0.42929	0.81993					0.3315	8.52436E-4		10.95	7.74808E-4		2.56411	0.01387
0.4263	1.25186					0.33153	8.52436E-4		11.05	0.00105		2.59404	0.0137
0.42	0.85251					0.33182	8.52436E-4		11.15	9.96181E-4		2.62397	0.01353
0.43603	1.72713					0.33212	8.52436E-4		11.25	6.64121E-4		2.65	0.01339
0.41991	3.86171					0.33242	8.52436E-4		11.35	6.64121E-4		2.6539	0.01337
0.4178	1.0385					0.33272	8.52436E-4		11.45	7.74808E-4		2.68383	0.0132
0.42423	3.13973					0.33301	8.52436E-4		11.55	8.85494E-4		2.71376	0.01304
0.38524	1.26635					0.33331	8.52436E-4		11.65	6.64121E-4		2.74369	0.01289
0.42457	2.36018					0.33361	8.52436E-4		11.75	4.98091E-4		2.75	0.01285
0.42434	0.87988					0.33391	8.52436E-4		11.85	0.00111		2.77362	0.01273
0.42064	3.60752					0.3342	8.52436E-4		11.95	5.53434E-4		2.80355	0.01258
0.4185	1.86226					0.3345	8.52436E-4		12.05	8.85494E-4		2.83348	0.01243
0.43299	3.8466					0.3348	8.52436E-4		12.15	7.19464E-4		2.85	0.01235
0.42975	1.1233					0.33509	8.52436E-4		12.25	4.98091E-4		2.86341	0.01228
0.4214	4.31976					0.33539	8.52436E-4		12.35	3.87404E-4		2.89334	0.01213
[truncated: 17,948 more rows]

## Sheet: Fig. 5j
H31-10R2(Me)K9(Me3) Scatter			BlockDepth histogram			Gaussian-fitting for BlockDepth			Restime histogram			LogNormal-fitting for Restime
[truncated: 89,302 more rows]

[truncated: 2 more sheets: Fig. 5k, Fig. 5m]
