# Supplementary material
Source: Research Square preprint supplement (doi:10.21203/rs.3.rs-9607376/v1)
Supplement: Supplementary file 2 [file 6e95ffecfee45fe8d9cc3785.xlsx]

## Sheet: Fig. 1d-h
		Steric	Binding	VDW	Electrostatic	Hydrophobic	EPF	EOF
Fig. 1d	WT_Arg	0.633	0	0.553	0.09	0.638	0.643	0.241
	WT_Cit	0.617	0.315	0.464	0.5	0.66	0	0.241
Fig. 1e	K238N_Arg	0.633	0.255	0.785	0.5	0.638	0.643	0.121
	K238N_Cit	0.617	0.17	0.612	0.5	0.66	0	0.121
Fig. 1f	K238C_Arg	0.633	0.109	1	0.5	0.638	0.643	0
	K238C_Cit	0.617	0.064	0.673	0.5	0.66	0	0
Fig. 1g	K238W_Arg	0.633	0.139	0.739	0.5	0.638	0.643	0
	K238W_Cit	0.617	0.054	0.629	0.5	0.66	0	0
Fig. 1h	K238E_Arg	0.633	0.934	0.581	0.91	0.638	0.643	0.965
	K238E_Cit	0.617	0.274	0.521	0.5	0.66	0	0.965
