# Supplementary material
Source: Research Square preprint supplement (doi:10.21203/rs.3.rs-9607376/v1)
Supplement: Supplementary file 2 [file 57ad979518d0c5ee2e856ee1.pdf]

## Reporting Summary

Nature Portfolio wishes to improve the reproducibility of the work that we publish. This form provides structure for consistency and transparency in reporting. For further information on Nature Portfolio policies, see our [Editorial Policies](#) and the [Editorial Policy Checklist](#).

### Statistics

For all statistical analyses, confirm that the following items are present in the figure legend, table legend, main text, or Methods section.

| n/a                                 | Confirmed                                                                                                                                                                                                                                                                                      |
|-------------------------------------|------------------------------------------------------------------------------------------------------------------------------------------------------------------------------------------------------------------------------------------------------------------------------------------------|
| <input type="checkbox"/>            | <input checked="" type="checkbox"/> The exact sample size ( $n$ ) for each experimental group/condition, given as a discrete number and unit of measurement                                                                                                                                    |
| <input type="checkbox"/>            | <input checked="" type="checkbox"/> A statement on whether measurements were taken from distinct samples or whether the same sample was measured repeatedly                                                                                                                                    |
| <input type="checkbox"/>            | <input checked="" type="checkbox"/> The statistical test(s) used AND whether they are one- or two-sided<br><i>Only common tests should be described solely by name; describe more complex techniques in the Methods section.</i>                                                               |
| <input checked="" type="checkbox"/> | <input type="checkbox"/> A description of all covariates tested                                                                                                                                                                                                                                |
| <input checked="" type="checkbox"/> | <input type="checkbox"/> A description of any assumptions or corrections, such as tests of normality and adjustment for multiple comparisons                                                                                                                                                   |
| <input type="checkbox"/>            | <input checked="" type="checkbox"/> A full description of the statistical parameters including central tendency (e.g. means) or other basic estimates (e.g. regression coefficient) AND variation (e.g. standard deviation) or associated estimates of uncertainty (e.g. confidence intervals) |
| <input checked="" type="checkbox"/> | <input type="checkbox"/> For null hypothesis testing, the test statistic (e.g. $F$ , $t$ , $r$ ) with confidence intervals, effect sizes, degrees of freedom and $P$ value noted<br><i>Give <math>P</math> values as exact values whenever suitable.</i>                                       |
| <input checked="" type="checkbox"/> | <input type="checkbox"/> For Bayesian analysis, information on the choice of priors and Markov chain Monte Carlo settings                                                                                                                                                                      |
| <input checked="" type="checkbox"/> | <input type="checkbox"/> For hierarchical and complex designs, identification of the appropriate level for tests and full reporting of outcomes                                                                                                                                                |
| <input type="checkbox"/>            | <input checked="" type="checkbox"/> Estimates of effect sizes (e.g. Cohen's $d$ , Pearson's $r$ ), indicating how they were calculated                                                                                                                                                         |

*Our web collection on [statistics for biologists](#) contains articles on many of the points above.*

### Software and code

Policy information about [availability of computer code](#)

|                 |                                                                                                                                                                                                                                                                  |
|-----------------|------------------------------------------------------------------------------------------------------------------------------------------------------------------------------------------------------------------------------------------------------------------|
| Data collection | Data acquisition was achieved using Axon Patch 200B and Digidata 1550B systems, and all recordings were processed with Clampex 11.2.                                                                                                                             |
| Data analysis   | Ionic current traces were analyzed using MOSAIC software ( <a href="https://pages.nist.gov/mosaic/">https://pages.nist.gov/mosaic/</a> ), Gaussian and LogNormal fittings were performed using Origin 2022. Machine learning was processed using Orange (v3.23). |

For manuscripts utilizing custom algorithms or software that are central to the research but not yet described in published literature, software must be made available to editors and reviewers. We strongly encourage code deposition in a community repository (e.g. GitHub). See the Nature Portfolio [guidelines for submitting code & software](#) for further information.

### Data

Policy information about [availability of data](#)

All manuscripts must include a [data availability statement](#). This statement should provide the following information, where applicable:

- Accession codes, unique identifiers, or web links for publicly available datasets
- A description of any restrictions on data availability
- For clinical datasets or third party data, please ensure that the statement adheres to our [policy](#)

All data supporting the main findings of this study are included in the article and supplementary information, the raw numbers of charts and graphs are available in the Source Data. Source Data are provided with this paper. Protein structure was taken from Protein data bank access number (5JZT).

## Research involving human participants, their data, or biological material

Policy information about studies with [human participants or human data](#). See also policy information about [sex, gender \(identity/presentation\), and sexual orientation](#) and [race, ethnicity and racism](#).

|                                                                    |                |
|--------------------------------------------------------------------|----------------|
| Reporting on sex and gender                                        | Not applicable |
| Reporting on race, ethnicity, or other socially relevant groupings | Not applicable |
| Population characteristics                                         | Not applicable |
| Recruitment                                                        | Not applicable |
| Ethics oversight                                                   | Not applicable |

Note that full information on the approval of the study protocol must also be provided in the manuscript.

## Field-specific reporting

Please select the one below that is the best fit for your research. If you are not sure, read the appropriate sections before making your selection.

Life sciences  Behavioural & social sciences  Ecological, evolutionary & environmental sciences

For a reference copy of the document with all sections, see [nature.com/documents/nr-reporting-summary-flat.pdf](https://www.nature.com/documents/nr-reporting-summary-flat.pdf)

## Life sciences study design

All studies must disclose on these points even when the disclosure is negative.

|                 |                                                                                                                                                                                                                                                    |
|-----------------|----------------------------------------------------------------------------------------------------------------------------------------------------------------------------------------------------------------------------------------------------|
| Sample size     | At least three independent nanopore sensing replicates were performed for each peptides, with a minimum of 500 individual nanopore events collected per replicate.                                                                                 |
| Data exclusions | Only events with dwell time $\geq 0.2$ ms were retained for quantitative analysis to avoid unreliable blockade-depth estimation for short events. Scatter plots, histograms, and Gaussian fittings were generated from the filtered event dataset. |
| Replication     | Number of replications are defined in the material and method section and/or the figure caption for each experiment.                                                                                                                               |
| Randomization   | Randomization was conducted via random selection of different batches of nanopore proteins and peptide samples in independent repeated experiments.                                                                                                |
| Blinding        | No blinding was performed, blinding was not required with the experimental setups used in this study.                                                                                                                                              |

## Reporting for specific materials, systems and methods

We require information from authors about some types of materials, experimental systems and methods used in many studies. Here, indicate whether each material, system or method listed is relevant to your study. If you are not sure if a list item applies to your research, read the appropriate section before selecting a response.

### Materials & experimental systems

| n/a                                 | Involvement in the study                               |
|-------------------------------------|--------------------------------------------------------|
| <input type="checkbox"/>            | <input type="checkbox"/> Antibodies                    |
| <input type="checkbox"/>            | <input type="checkbox"/> Eukaryotic cell lines         |
| <input type="checkbox"/>            | <input type="checkbox"/> Palaeontology and archaeology |
| <input type="checkbox"/>            | <input type="checkbox"/> Animals and other organisms   |
| <input type="checkbox"/>            | <input type="checkbox"/> Clinical data                 |
| <input checked="" type="checkbox"/> | <input type="checkbox"/> Dual use research of concern  |
| <input type="checkbox"/>            | <input type="checkbox"/> Plants                        |

### Methods

| n/a                      | Involvement in the study                        |
|--------------------------|-------------------------------------------------|
| <input type="checkbox"/> | <input type="checkbox"/> ChIP-seq               |
| <input type="checkbox"/> | <input type="checkbox"/> Flow cytometry         |
| <input type="checkbox"/> | <input type="checkbox"/> MRI-based neuroimaging |

## Antibodies

|                 |                |
|-----------------|----------------|
| Antibodies used | Not applicable |
| Validation      | Not applicable |

## Eukaryotic cell lines

Policy information about [cell lines and Sex and Gender in Research](#)

|                                                                      |                |
|----------------------------------------------------------------------|----------------|
| Cell line source(s)                                                  | Not applicable |
| Authentication                                                       | Not applicable |
| Mycoplasma contamination                                             | Not applicable |
| Commonly misidentified lines<br>(See <a href="#">ICLAC</a> register) | Not applicable |

## Palaeontology and Archaeology

|                                                                                                                                                 |                |
|-------------------------------------------------------------------------------------------------------------------------------------------------|----------------|
| Specimen provenance                                                                                                                             | Not applicable |
| Specimen deposition                                                                                                                             | Not applicable |
| Dating methods                                                                                                                                  | Not applicable |
| <input type="checkbox"/> Tick this box to confirm that the raw and calibrated dates are available in the paper or in Supplementary Information. |                |
| Ethics oversight                                                                                                                                | Not applicable |

Note that full information on the approval of the study protocol must also be provided in the manuscript.

## Animals and other research organisms

Policy information about [studies involving animals; ARRIVE guidelines](#) recommended for reporting animal research, and [Sex and Gender in Research](#)

|                         |                |
|-------------------------|----------------|
| Laboratory animals      | Not applicable |
| Wild animals            | Not applicable |
| Reporting on sex        | Not applicable |
| Field-collected samples | Not applicable |
| Ethics oversight        | Not applicable |

Note that full information on the approval of the study protocol must also be provided in the manuscript.

## Clinical data

Policy information about [clinical studies](#)

All manuscripts should comply with the ICMJE [guidelines for publication of clinical research](#) and a completed [CONSORT checklist](#) must be included with all submissions.

|                             |                |
|-----------------------------|----------------|
| Clinical trial registration | Not applicable |
| Study protocol              | Not applicable |
| Data collection             | Not applicable |
| Outcomes                    | Not applicable |

## Plants

|                       |                                             |
|-----------------------|---------------------------------------------|
| Seed stocks           | <input type="text" value="Not applicable"/> |
| Novel plant genotypes | <input type="text" value="Not applicable"/> |
| Authentication        | <input type="text" value="Not applicable"/> |

## ChIP-seq

### Data deposition

- Confirm that both raw and final processed data have been deposited in a public database such as [GEO](#).
- Confirm that you have deposited or provided access to graph files (e.g. BED files) for the called peaks.

|                                                                    |                                             |
|--------------------------------------------------------------------|---------------------------------------------|
| Data access links<br><i>May remain private before publication.</i> | <input type="text" value="Not applicable"/> |
| Files in database submission                                       | <input type="text" value="Not applicable"/> |
| Genome browser session<br>(e.g. <a href="#">UCSC</a> )             | <input type="text" value="Not applicable"/> |

### Methodology

|                         |                                             |
|-------------------------|---------------------------------------------|
| Replicates              | <input type="text" value="Not applicable"/> |
| Sequencing depth        | <input type="text" value="Not applicable"/> |
| Antibodies              | <input type="text" value="Not applicable"/> |
| Peak calling parameters | <input type="text" value="Not applicable"/> |
| Data quality            | <input type="text" value="Not applicable"/> |
| Software                | <input type="text" value="Not applicable"/> |

## Flow Cytometry

### Plots

Confirm that:

- The axis labels state the marker and fluorochrome used (e.g. CD4-FITC).
- The axis scales are clearly visible. Include numbers along axes only for bottom left plot of group (a 'group' is an analysis of identical markers).
- All plots are contour plots with outliers or pseudocolor plots.
- A numerical value for number of cells or percentage (with statistics) is provided.

### Methodology

|                           |                                             |
|---------------------------|---------------------------------------------|
| Sample preparation        | <input type="text" value="Not applicable"/> |
| Instrument                | <input type="text" value="Not applicable"/> |
| Software                  | <input type="text" value="Not applicable"/> |
| Cell population abundance | <input type="text" value="Not applicable"/> |
| Gating strategy           | <input type="text" value="Not applicable"/> |

- Tick this box to confirm that a figure exemplifying the gating strategy is provided in the Supplementary Information.

## Magnetic resonance imaging

### Experimental design

|                                 |                                             |
|---------------------------------|---------------------------------------------|
| Design type                     | <input type="text" value="Not applicable"/> |
| Design specifications           | <input type="text" value="Not applicable"/> |
| Behavioral performance measures | <input type="text" value="Not applicable"/> |

### Acquisition

|                               |                                                                 |
|-------------------------------|-----------------------------------------------------------------|
| Imaging type(s)               | <input type="text" value="Not applicable"/>                     |
| Field strength                | <input type="text" value="Not applicable"/>                     |
| Sequence & imaging parameters | <input type="text" value="Not applicable"/>                     |
| Area of acquisition           | <input type="text" value="Not applicable"/>                     |
| Diffusion MRI                 | <input type="checkbox"/> Used <input type="checkbox"/> Not used |

### Preprocessing

|                            |                                             |
|----------------------------|---------------------------------------------|
| Preprocessing software     | <input type="text" value="Not applicable"/> |
| Normalization              | <input type="text" value="Not applicable"/> |
| Normalization template     | <input type="text" value="Not applicable"/> |
| Noise and artifact removal | <input type="text" value="Not applicable"/> |
| Volume censoring           | <input type="text" value="Not applicable"/> |

### Statistical modeling & inference

|                                           |                                                                                                       |
|-------------------------------------------|-------------------------------------------------------------------------------------------------------|
| Model type and settings                   | <input type="text" value="Not applicable"/>                                                           |
| Effect(s) tested                          | <input type="text" value="Not applicable"/>                                                           |
| Specify type of analysis:                 | <input type="checkbox"/> Whole brain <input type="checkbox"/> ROI-based <input type="checkbox"/> Both |
| Statistic type for inference              | <input type="text" value="Not applicable"/>                                                           |
| (See <a href="#">Eklund et al. 2016</a> ) |                                                                                                       |
| Correction                                | <input type="text" value="Not applicable"/>                                                           |

### Models & analysis

|                                               |                                                                       |
|-----------------------------------------------|-----------------------------------------------------------------------|
| n/a                                           | Involvement in the study                                              |
| <input type="checkbox"/>                      | <input type="checkbox"/> Functional and/or effective connectivity     |
| <input type="checkbox"/>                      | <input type="checkbox"/> Graph analysis                               |
| <input type="checkbox"/>                      | <input type="checkbox"/> Multivariate modeling or predictive analysis |
| Functional and/or effective connectivity      | <input type="text" value="Not applicable"/>                           |
| Graph analysis                                | <input type="text" value="Not applicable"/>                           |
| Multivariate modeling and predictive analysis | <input type="text" value="Not applicable"/>                           |
