# Supplementary material
Source: Research Square preprint supplement (doi:10.21203/rs.3.rs-9607376/v1)
Supplement: Supplementary file 3 [file ace81f034ccb6976287c6b61.xlsx]

## Sheet: Fig. 4b
H41-10			H41-10R3(Cit)			Gaussian-fitting for H41-10
BlockDepth	Restime (ms)		BlockDepth	Restime (ms)		BlockDepth	Relative counts
0.59588	1.19652		0.6456	0.22087		0.005	0.00165
0.62995	0.86412		0.50887	0.21189		0.00698	0.00165
0.62919	0.14607		0.10601	0.92309		0.00797	0.00165
0.6037	0.34486		0.41231	0.36579		0.00896	0.00165
0.62121	0.32703		0.30201	2.65028		0.00995	0.00165
0.60926	2.20154		0.26826	0.39195		0.01095	0.00165
0.59359	1.05115		0.33141	0.26448		0.01194	0.00165
0.66214	0.12655		0.99507	0.27869		0.01293	0.00165
0.62459	0.45949		0.6344	0.24069		0.01392	0.00165
0.63818	0.16313		0.14233	0.33103		0.01491	0.00165
0.61118	1.45726		0.37658	0.41218		0.015	0.00165
0.6437	0.1687		0.42943	0.2739		0.0159	0.00165
0.61266	1.12704		0.75936	0.23928		0.01689	0.00165
0.60215	1.42794		0.25909	4.56051		0.01788	0.00165
0.68643	0.14951		0.53205	0.2511		0.01887	0.00165
0.60115	2.40286		0.19514	0.22635		0.01986	0.00165
0.63493	0.26516		0.28721	0.23306		0.02086	0.00165
0.62026	1.18938		0.21809	0.2261		0.02185	0.00165
0.61927	0.95426		0.57948	0.42078		0.02284	0.00165
0.76792	0.10638		0.34906	2.56369		0.02383	0.00165
0.61968	0.60077		0.15092	2.14495		0.02482	0.00165
0.61946	0.34693		0.33721	0.2041		0.025	0.00165
0.67476	0.16544		0.33254	0.29507		0.02581	0.00165
0.6091	0.59608		0.27714	0.77626		0.0268	0.00165
0.60982	0.76619		0.22414	0.33926		0.02779	0.00165
0.64825	0.14438		0.28349	0.75975		0.02878	0.00165
0.59929	0.49395		0.35209	0.43341		0.02977	0.00165
0.60627	1.09188		0.47759	0.37612		0.03077	0.00165
0.60763	3.37218		0.53294	0.24038		0.03176	0.00165
0.61544	3.76676		0.80444	0.84796		0.03275	0.00165
0.59478	0.60147		0.59909	0.52841		0.03374	0.00165
0.60649	1.80191		0.29184	0.20299		0.03473	0.00165
0.60338	0.54596		0.39228	0.45945		0.035	0.00165
0.62269	0.60265		0.42796	0.20442		0.03572	0.00165
0.61951	0.49865		0.67151	0.23067		0.03671	0.00165
0.60682	3.19038		0.48503	0.21221		0.0377	0.00165
0.60827	0.58385		0.95096	0.20898		0.03869	0.00165
0.61068	0.19012		0.51379	0.87688		0.03968	0.00165
0.60878	2.79944		0.90082	0.82755		0.04068	0.00165
0.6121	2.22748		0.88414	0.23628		0.04167	0.00165
0.58954	3.76634		0.85805	0.32246		0.04266	0.00165
0.60442	0.80093		0.84029	1.22085		0.04365	0.00165
0.63212	0.18372		0.82234	0.64059		0.04464	0.00165
0.6129	0.56692		0.80857	1.26386		0.045	0.00165
0.6174	0.45208		0.84362	0.42162		0.04563	0.00165
0.61171	0.97847		0.84677	0.48815		0.04662	0.00165
0.60744	2.35589		0.87714	0.41101		0.04761	0.00165
0.64182	0.49555		0.85426	0.29708		0.0486	0.00165
0.63385	0.8064		0.88273	0.50663		0.04959	0.00165
0.65372	0.17452		0.89245	1.35063		0.05059	0.00165
0.60678	2.05355		0.62805	0.22165		0.05158	0.00165
0.63568	0.29437		0.90883	0.20865		0.05257	0.00165
0.60673	2.61481		0.8453	0.23176		0.05356	0.00165
0.59631	0.33207		0.32242	0.81618		0.05455	0.00165
0.67514	0.17348		0.25716	0.23899		0.055	0.00165
0.62565	0.55838		0.23788	0.27818		0.05554	0.00165
0.60981	0.71793		0.42838	0.49505		0.05653	0.00165
0.59881	0.17747		0.77336	0.23696		0.05752	0.00165
0.65358	0.15469		0.70205	0.23986		0.05851	0.00165
0.60586	1.45256		0.94976	0.24889		0.0595	0.00165
0.61581	1.53991		0.66046	0.25186		0.0605	0.00165
0.60361	0.796		0.61703	0.2175		0.06149	0.00165
0.59797	0.84343		0.88355	0.21682		0.06248	0.00165
0.63205	0.43827		0.91466	0.26379		0.06347	0.00165
0.75747	0.08463		0.27935	1.20453		0.06446	0.00165
0.68518	0.13925		0.9649	0.24866		0.065	0.00165
0.77891	0.07549		0.93278	0.21826		0.06545	0.00165
0.61931	0.70453		0.94559	0.21041		0.06644	0.00165
0.62226	0.55516		0.68293	0.21439		0.06743	0.00165
0.60381	1.31344		0.67397	0.20986		0.06842	0.00165
0.60412	1.22402		0.6322	0.26515		0.06941	0.00165
0.65021	0.32991		0.53899	0.27001		0.07041	0.00165
0.60705	0.46594		0.91923	0.22146		0.0714	0.00165
0.61338	2.92265		0.94391	0.25169		0.07239	0.00165
0.60927	0.96704		0.67882	0.25172		0.07338	0.00165
0.63451	0.39618		0.98438	0.21695		0.07437	0.00165
0.59408	0.51422		0.87672	0.22834		0.075	0.00165
0.60032	2.68858		0.76048	0.22444		0.07536	0.00165
0.61017	0.19139					0.07635	0.00165
0.6224	0.61755					0.07734	0.00165
0.67412	0.17124					0.07833	0.00165
0.60811	1.20677					0.07932	0.00165
0.60009	1.46161					0.08032	0.00165
0.60723	1.87131					0.08131	0.00165
0.69971	0.19203					0.0823	0.00165
0.62575	0.76554					0.08329	0.00165
0.60254	1.34591					0.08428	0.00165
0.61499	0.49147					0.085	0.00165
0.58904	0.96207					0.08527	0.00165
0.75452	0.0915					0.08626	0.00165
0.57935	0.63988					0.08725	0.00165
0.5972	2.20988					0.08824	0.00165
0.60716	0.5284					0.08923	0.00165
0.61385	0.37105					0.09023	0.00165
0.59716	1.21371					0.09122	0.00165
0.60996	0.87083					0.09221	0.00165
0.59732	1.74083					0.0932	0.00165
0.62781	0.4661					0.09419	0.00165
0.60569	1.83384					0.095	0.00165
0.59137	1.50322					0.09518	0.00165
0.63805	0.55203					0.09617	0.00165
0.62093	0.25075					0.09716	0.00165
0.61182	1.36547					0.09815	0.00165
0.61576	2.34367					0.09914	0.00165
0.72916	0.09578					0.10014	0.00165
0.6077	2.00646					0.10113	0.00165
0.67533	0.11904					0.10212	0.00165
0.61063	0.77574					0.10311	0.00165
0.60071	0.47827					0.1041	0.00165
0.68797	0.12627					0.105	0.00165
0.67091	0.79402					0.10509	0.00165
0.63009	0.3426					0.10608	0.00165
0.60903	1.44894					0.10707	0.00165
0.62091	0.44732					0.10806	0.00165
0.60394	5.15233					0.10905	0.00165
0.61274	0.81722					0.11005	0.00165
0.61224	1.40868					0.11104	0.00165
0.58566	1.10693					0.11203	0.00165
0.60683	1.55224					0.11302	0.00165
0.61459	1.10162					0.11401	0.00165
0.61141	0.74241					0.115	0.00165
0.61442	0.50384					0.115	0.00165
0.67116	0.18844					0.11599	0.00165
0.61913	1.06347					0.11698	0.00165
0.62374	0.5272					0.11797	0.00165
0.61174	3.25962					0.11896	0.00165
0.63419	0.25903					0.11995	0.00165
0.60477	0.82318					0.12095	0.00165
0.60811	1.35036					0.12194	0.00165
0.60248	1.16711					0.12293	0.00165
0.72895	0.0796					0.12392	0.00165
0.60742	1.02668					0.12491	0.00165
0.60292	0.96526					0.125	0.00165
0.61496	0.37048					0.1259	0.00165
0.64496	0.30357					0.12689	0.00165
0.6128	0.71115					0.12788	0.00165
0.60068	1.64233					0.12887	0.00165
0.60286	1.19557					0.12986	0.00165
0.58048	0.84473					0.13086	0.00165
0.61175	0.35432					0.13185	0.00165
0.60932	0.69316					0.13284	0.00165
0.61677	0.72734					0.13383	0.00165
0.62583	0.57869					0.13482	0.00165
0.61558	1.16082					0.135	0.00165
0.64134	0.1971					0.13581	0.00165
0.61561	3.35989					0.1368	0.00165
0.63801	1.09538					0.13779	0.00165
0.65663	0.20984					0.13878	0.00165
0.69964	0.08112					0.13977	0.00165
0.60619	0.69251					0.14077	0.00165
0.62604	0.86699					0.14176	0.00165
0.60764	0.93398					0.14275	0.00165
0.60104	0.47266					0.14374	0.00165
0.59301	0.13472					0.14473	0.00165
0.60956	1.20347					0.145	0.00165
0.67114	0.11848					0.14572	0.00165
0.60756	2.66513					0.14671	0.00165
0.60841	0.80024					0.1477	0.00165
0.74249	0.08968					0.14869	0.00165
0.63311	2.26672					0.14968	0.00165
0.60227	0.70327					0.15068	0.00165
0.67395	0.13694					0.15167	0.00165
0.6161	1.62962					0.15266	0.00165
0.61003	2.16725					0.15365	0.00165
0.59067	2.66218					0.15464	0.00165
0.60061	0.57603					0.155	0.00165
0.62291	0.20653					0.15563	0.00165
0.65178	0.24879					0.15662	0.00165
0.60784	1.12495					0.15761	0.00165
0.6141	0.96689					0.1586	0.00165
0.59786	1.68794					0.15959	0.00165
0.63682	1.56795					0.16059	0.00165
0.62542	1.19257					0.16158	0.00165
0.60419	1.69439					0.16257	0.00165
0.65889	0.18648					0.16356	0.00165
0.62226	0.55509					0.16455	0.00165
0.61192	0.67968					0.165	0.00165
0.59865	0.72778					0.16554	0.00165
0.60702	0.47607					0.16653	0.00165
0.62388	1.34761					0.16752	0.00165
0.75142	0.09135					0.16851	0.00165
0.61745	0.51463					0.1695	0.00165
0.62196	0.25465					0.1705	0.00165
0.63161	0.46566					0.17149	0.00165
0.60618	0.4414					0.17248	0.00165
0.73551	0.10397					0.17347	0.00165
0.61468	0.36297					0.17446	0.00165
0.60721	2.49156					0.175	0.00165
0.60077	4.33988					0.17545	0.00165
0.62577	0.44746					0.17644	0.00165
0.62552	0.42997					0.17743	0.00165
0.68003	0.12315					0.17842	0.00165
0.62587	0.73982					0.17941	0.00165
0.6075	0.62923					0.18041	0.00165
0.61714	0.95118					0.1814	0.00165
0.59073	4.77776					0.18239	0.00165
0.61477	1.84784					0.18338	0.00165
0.61869	1.18245					0.18437	0.00165
0.61676	0.45065					0.185	0.00165
0.61555	1.11252					0.18536	0.00165
0.62259	0.61931					0.18635	0.00165
0.59028	1.04309					0.18734	0.00165
0.57404	0.25081					0.18833	0.00165
0.63527	0.28006					0.18932	0.00165
0.59367	2.12386					0.19032	0.00165
0.62048	1.99934					0.19131	0.00165
0.62247	0.31903					0.1923	0.00165
0.62619	0.86796					0.19329	0.00165
0.61852	0.47079					0.19428	0.00165
0.61341	0.28017					0.195	0.00165
0.59759	1.55895					0.19527	0.00165
0.63566	0.3395					0.19626	0.00165
0.59385	1.27156					0.19725	0.00165
0.58633	0.2828					0.19824	0.00165
0.61811	0.51299					0.19923	0.00165
0.60846	0.95101					0.20023	0.00165
0.58213	0.77206					0.20122	0.00165
0.6233	0.77279					0.20221	0.00165
0.62322	0.45067					0.2032	0.00165
0.62134	0.22884					0.20419	0.00165
0.64685	0.30135					0.205	0.00165
0.62536	0.59327					0.20518	0.00165
0.58661	0.52979					0.20617	0.00165
0.59963	1.05705					0.20716	0.00165
0.60396	1.66361					0.20815	0.00165
0.59612	1.27499					0.20914	0.00165
0.61859	3.0947					0.21014	0.00165
0.70533	0.12488					0.21113	0.00165
0.60197	1.35574					0.21212	0.00165
0.62111	2.21695					0.21311	0.00165
0.61401	0.46138					0.2141	0.00165
0.62269	0.8428					0.215	0.00165
0.608	0.46099					0.21509	0.00165
0.6254	0.244					0.21608	0.00165
0.62221	1.0793					0.21707	0.00165
0.72196	0.08616					0.21806	0.00165
0.62238	0.80402					0.21905	0.00165
0.59114	0.68645					0.22005	0.00165
0.62342	0.65877					0.22104	0.00165
0.61772	0.43402					0.22203	0.00165
0.62574	0.29902					0.22302	0.00165
0.59998	0.44382					0.22401	0.00165
0.66517	0.1613					0.225	0.00165
0.60327	0.2597					0.225	0.00165
0.6011	1.13215					0.22599	0.00165
0.59111	0.92329					0.22698	0.00165
0.5949	2.42267					0.22797	0.00165
0.60783	0.90729					0.22896	0.00165
0.6094	1.92883					0.22995	0.00165
0.73806	0.09803					0.23095	0.00165
0.60218	1.76277					0.23194	0.00165
0.60778	1.16763					0.23293	0.00165
0.62936	0.57488					0.23392	0.00165
0.60226	1.97109					0.23491	0.00165
0.61321	0.55882					0.235	0.00165
0.71456	0.11195					0.2359	0.00165
0.60851	0.64132					0.23689	0.00165
0.60107	2.3926					0.23788	0.00165
0.62575	0.26695					0.23887	0.00165
0.60357	0.30475					0.23986	0.00165
0.62651	1.78684					0.24086	0.00165
0.62324	2.27151					0.24185	0.00165
0.59202	4.32326					0.24284	0.00165
0.58927	0.78384					0.24383	0.00165
0.61072	1.36352					0.24482	0.00165
0.64105	0.17888					0.245	0.00165
0.60467	2.03378					0.24581	0.00165
0.64862	0.28848					0.2468	0.00165
0.60948	0.47502					0.24779	0.00165
0.59896	0.38198					0.24878	0.00165
0.61243	4.00562					0.24977	0.00165
0.60565	1.1374					0.25077	0.00165
0.61678	0.83207					0.25176	0.00165
0.65277	0.1516					0.25275	0.00165
0.62086	1.21158					0.25374	0.00165
0.60386	1.96821					0.25473	0.00165
0.62597	0.19517					0.255	0.00165
0.61275	0.35665					0.25572	0.00165
0.60562	0.64635					0.25671	0.00165
0.59856	1.67391					0.2577	0.00165
0.62582	0.45891					0.25869	0.00165
0.66637	0.14206					0.25968	0.00165
0.62892	0.85316					0.26068	0.00165
0.60843	1.62217					0.26167	0.00165
0.61278	0.51838					0.26266	0.00165
0.61475	2.06062					0.26365	0.00165
0.61897	1.85389					0.26464	0.00165
0.60968	1.63419					0.265	0.00165
0.59196	1.1789					0.26563	0.00165
0.6133	2.63976					0.26662	0.00165
0.58668	1.84045					0.26761	0.00165
0.61511	6.87024					0.2686	0.00165
0.78717	0.39048					0.26959	0.00165
0.64776	0.11055					0.27059	0.00165
0.55638	2.5101					0.27158	0.00165
0.59237	1.02488					0.27257	0.00165
0.61445	1.82384					0.27356	0.00165
0.61504	0.55424					0.27455	0.00165
0.60176	5.17329					0.275	0.00165
0.62026	0.38227					0.27554	0.00165
0.67005	0.14329					0.27653	0.00165
0.63512	0.14949					0.27752	0.00165
0.6217	0.89219					0.27851	0.00165
0.60342	1.37719					0.2795	0.00165
0.61173	0.19526					0.2805	0.00165
0.61324	4.33803					0.28149	0.00165
0.59534	3.40975					0.28248	0.00165
0.59748	1.08515					0.28347	0.00165
0.63546	0.41737					0.28446	0.00165
0.60879	1.04167					0.285	0.00165
0.6164	0.80138					0.28545	0.00165
0.62543	0.37756					0.28644	0.00165
0.76241	0.08974					0.28743	0.00165
0.60849	1.07452					0.28842	0.00165
0.62507	0.63415					0.28941	0.00165
0.61466	0.42011					0.29041	0.00165
0.625	0.58414					0.2914	0.00165
0.60832	1.38281					0.29239	0.00165
0.60403	0.73365					0.29338	0.00165
0.62324	0.37909					0.29437	0.00165
0.62314	0.25019					0.295	0.00165
0.63088	0.48778					0.29536	0.00165
0.67707	0.11816					0.29635	0.00165
0.61035	1.1207					0.29734	0.00165
0.63095	0.2952					0.29833	0.00165
0.61355	0.54084					0.29932	0.00165
0.60688	0.28229					0.30032	0.00165
0.6838	0.10729					0.30131	0.00165
0.60337	3.99082					0.3023	0.00165
0.62032	0.74833					0.30329	0.00165
0.57785	1.20587					0.30428	0.00165
0.59281	2.59884					0.305	0.00165
0.57498	0.3405					0.30527	0.00165
0.64361	0.29423					0.30626	0.00165
0.75432	0.07983					0.30725	0.00165
0.63472	0.32003					0.30824	0.00165
0.61087	3.4518					0.30923	0.00165
0.73456	0.08467					0.31023	0.00165
0.60462	0.71052					0.31122	0.00165
0.63408	0.28689					0.31221	0.00165
0.60885	1.40302					0.3132	0.00165
0.62009	1.72585					0.31419	0.00165
0.74116	0.10008					0.315	0.00165
0.65625	0.56758					0.31518	0.00165
0.62445	0.70375					0.31617	0.00165
0.61284	1.2585					0.31716	0.00165
0.60794	0.61225					0.31815	0.00165
0.61888	0.50168					0.31914	0.00165
0.60803	2.14814					0.32014	0.00165
0.62795	0.46056					0.32113	0.00165
0.59792	0.75058					0.32212	0.00165
0.60447	3.63794					0.32311	0.00165
0.60264	2.06034					0.3241	0.00165
0.60587	1.81128					0.325	0.00165
0.54519	4.087					0.32509	0.00165
0.60738	1.91319					0.32608	0.00165
0.76239	0.08582					0.32707	0.00165
0.61549	0.87489					0.32806	0.00165
0.62871	0.55392					0.32905	0.00165
0.64992	0.13474					0.33005	0.00165
0.61009	1.42684					0.33104	0.00165
0.79929	0.06525					0.33203	0.00165
0.6618	0.1945					0.33302	0.00165
0.62149	0.98688					0.33401	0.00165
0.61863	1.37868					0.335	0.00165
0.62782	1.87642					0.33599	0.00165
0.63468	0.28716					0.33698	0.00165
0.61188	1.95062					0.33797	0.00165
0.6175	0.50729					0.33896	0.00165
0.60919	1.26162					0.33995	0.00165
0.64672	0.25877					0.34095	0.00165
0.59377	1.09103					0.34194	0.00165
0.60657	0.35559					0.34293	0.00165
0.61408	0.83781					0.34392	0.00165
0.61703	0.46813					0.34491	0.00165
0.61238	0.64604					0.345	0.00165
0.60328	1.457					0.3459	0.00165
0.61753	0.43798					0.34689	0.00165
0.59646	1.82814					0.34788	0.00165
0.62474	0.43073					0.34887	0.00165
0.66827	0.13905					0.34986	0.00165
0.61617	1.26251					0.35086	0.00165
0.59615	2.0781					0.35185	0.00165
0.59011	2.75167					0.35284	0.00165
0.60273	0.77947					0.35383	0.00165
0.60544	2.11345					0.35482	0.00165
0.59269	1.52218					0.355	0.00165
0.62449	0.88709					0.35581	0.00165
0.59197	0.39431					0.3568	0.00165
0.62016	0.28994					0.35779	0.00165
0.61092	1.14462					0.35878	0.00165
0.61579	0.94002					0.35977	0.00165
0.59005	0.58988					0.36077	0.00165
0.61333	0.39599					0.36176	0.00165
0.60048	2.08126					0.36275	0.00165
0.64665	0.36282					0.36374	0.00165
0.65598	0.15458					0.36473	0.00165
0.66991	0.20582					0.365	0.00165
0.60598	0.69421					0.36572	0.00165
0.60548	2.21501					0.36671	0.00165
0.61171	0.71835					0.3677	0.00165
0.61537	3.90657					0.36869	0.00165
0.59486	0.72219					0.36968	0.00165
0.60519	1.06618					0.37068	0.00165
0.60847	0.59113					0.37167	0.00165
0.60615	2.01516					0.37266	0.00165
0.61813	0.27433					0.37365	0.00165
0.61192	0.67545					0.37464	0.00165
0.61507	0.55573					0.375	0.00165
0.6157	2.52673					0.37563	0.00165
0.61828	2.7628					0.37662	0.00165
0.61053	2.43027					0.37761	0.00165
0.62604	0.22525					0.3786	0.00165
0.61582	0.3645					0.37959	0.00165
0.58798	1.39963					0.38059	0.00165
0.61762	1.24267					0.38158	0.00165
0.61168	1.31293					0.38257	0.00165
0.59423	0.95138					0.38356	0.00165
0.66814	0.14762					0.38455	0.00165
0.62812	2.56857					0.385	0.00165
0.61322	0.27471					0.38554	0.00165
0.62434	0.37678					0.38653	0.00165
0.61285	1.72283					0.38752	0.00165
0.60489	1.19298					0.38851	0.00165
0.71726	0.09179					0.3895	0.00165
0.61685	0.72188					0.3905	0.00165
0.6215	0.73561					0.39149	0.00165
0.59089	0.485					0.39248	0.00165
0.63983	0.31859					0.39347	0.00165
0.60474	1.51806					0.39446	0.00165
0.5819	3.60804					0.395	0.00165
0.64558	0.18275					0.39545	0.00165
0.61443	0.50056					0.39644	0.00165
0.62724	0.2757					0.39743	0.00165
0.59439	0.92778					0.39842	0.00165
0.61251	0.38287					0.39941	0.00165
0.62641	0.61435					0.40041	0.00165
0.62566	0.63638					0.4014	0.00165
0.60901	0.3539					0.40239	0.00165
0.60833	0.47633					0.40338	0.00165
0.67445	0.14264					0.40437	0.00165
0.60201	0.62298					0.405	0.00165
0.60128	1.2482					0.40536	0.00165
0.59944	2.96719					0.40635	0.00165
0.62857	0.40741					0.40734	0.00165
0.72785	0.10687					0.40833	0.00165
0.67245	0.18203					0.40932	0.00165
0.62831	0.47361					0.41032	0.00165
0.64264	0.30089					0.41131	0.00165
0.68273	0.12999					0.4123	0.00165
0.6237	0.56638					0.41329	0.00165
0.609	1.87387					0.41428	0.00165
0.61446	0.45077					0.415	0.00165
0.59456	0.91006					0.41527	0.00165
0.61358	1.6506					0.41626	0.00165
0.59825	0.48344					0.41725	0.00165
0.61572	1.14359					0.41824	0.00165
0.60379	1.0191					0.41923	0.00165
0.61649	1.65599					0.42023	0.00165
0.63971	0.39792					0.42122	0.00165
0.65531	0.30366					0.42221	0.00165
0.59203	1.86826					0.4232	0.00165
0.61277	1.45807					0.42419	0.00165
0.60983	0.52924					0.425	0.00165
0.62563	0.52457					0.42518	0.00165
0.61004	0.93544					0.42617	0.00165
0.6097	0.68478					0.42716	0.00165
0.62072	0.69467					0.42815	0.00165
0.62178	0.17011					0.42914	0.00165
0.67705	0.10582					0.43014	0.00165
0.61238	2.09855					0.43113	0.00165
0.64544	0.2773					0.43212	0.00165
0.60868	1.1603					0.43311	0.00165
0.56629	0.46669					0.4341	0.00165
0.5583	0.21885					0.435	0.00165
0.60514	2.25413					0.43509	0.00165
0.63279	0.1675					0.43608	0.00165
0.60679	0.44344					0.43707	0.00165
0.59845	0.45958					0.43806	0.00165
0.67379	0.17389					0.43905	0.00165
0.61713	0.41902					0.44005	0.00165
0.63306	0.15476					0.44104	0.00165
0.60976	0.47879					0.44203	0.00165
0.60054	1.90419					0.44302	0.00165
0.61472	4.48217					0.44401	0.00165
0.59947	2.55503					0.445	0.00165
0.61558	2.34722					0.445	0.00165
0.62614	1.20714					0.44599	0.00165
0.64176	0.22969					0.44698	0.00165
0.61023	0.81771					0.44797	0.00165
0.70647	0.1029					0.44896	0.00165
0.62789	0.7416					0.44995	0.00165
0.67523	0.14514					0.45095	0.00165
0.63323	2.02904					0.45194	0.00165
0.61003	0.28648					0.45293	0.00165
0.6162	1.16961					0.45392	0.00165
0.60588	0.95913					0.45491	0.00165
0.58218	2.0233					0.455	0.00165
0.61391	0.69618					0.4559	0.00165
0.59193	0.29214					0.45689	0.00165
0.61432	2.05164					0.45788	0.00165
0.62049	0.72581					0.45887	0.00165
0.60587	0.19448					0.45986	0.00165
0.63345	0.46407					0.46086	0.00165
0.62067	1.71808					0.46185	0.00165
0.60156	3.07145					0.46284	0.00165
0.61434	1.15823					0.46383	0.00165
0.63532	0.74236					0.46482	0.00165
0.61554	2.68383					0.465	0.00165
0.60747	1.07127					0.46581	0.00165
0.57077	0.65355					0.4668	0.00165
0.66907	0.20269					0.46779	0.00165
0.60859	0.78009					0.46878	0.00165
0.59695	0.65345					0.46977	0.00165
0.78451	0.08552					0.47077	0.00165
0.6195	0.65514					0.47176	0.00165
0.59995	0.63081					0.47275	0.00165
0.64783	0.32015					0.47374	0.00165
0.57874	0.41796					0.47473	0.00165
0.6101	1.067					0.475	0.00165
0.73328	0.09108					0.47572	0.00165
0.60227	0.4392					0.47671	0.00165
0.61408	1.28578					0.4777	0.00165
0.60873	3.70947					0.47869	0.00165
0.63183	0.3293					0.47968	0.00165
0.61014	0.58594					0.48068	0.00165
0.64027	0.50966					0.48167	0.00165
0.62305	0.47601					0.48266	0.00165
0.59326	0.75164					0.48365	0.00165
0.58839	1.26051					0.48464	0.00165
0.60793	0.90289					0.485	0.00165
0.61523	1.32418					0.48563	0.00165
0.61051	0.77765					0.48662	0.00165
0.6518	0.18357					0.48761	0.00165
0.61426	0.57001					0.4886	0.00165
0.64916	0.20577					0.48959	0.00165
0.64375	0.52202					0.49059	0.00165
0.61221	1.37063					0.49158	0.00165
0.62491	3.29018					0.49257	0.00165
0.61284	1.00862					0.49356	0.00165
0.58933	0.73886					0.49455	0.00165
0.60676	0.59054					0.495	0.00165
0.65057	0.21844					0.49554	0.00165
0.64079	0.57138					0.49653	0.00165
0.73527	0.08774					0.49752	0.00165
0.59712	0.83808					0.49851	0.00165
0.62115	0.61159					0.4995	0.00165
0.64124	0.18385					0.5005	0.00165
0.63033	1.1435					0.50149	0.00165
0.61079	1.03584					0.50248	0.00165
0.6072	1.17793					0.50347	0.00165
0.60649	2.43381					0.50446	0.00165
0.6182	1.24215					0.505	0.00165
0.6039	0.24991					0.50545	0.00165
0.61519	0.83894					0.50644	0.00165
0.62026	1.19887					0.50743	0.00165
0.63135	0.92207					0.50842	0.00165
0.59991	3.17821					0.50941	0.00165
0.60436	0.38033					0.51041	0.00165
0.62039	0.95143					0.5114	0.00165
0.61125	1.69314					0.51239	0.00165
0.7138	0.09768					0.51338	0.00165
0.60199	1.44274					0.51437	0.00165
0.61163	0.46086					0.515	0.00165
0.61449	0.9194					0.51536	0.00165
0.60708	1.07444					0.51635	0.00165
0.60161	0.4867					0.51734	0.00165
0.62282	0.47318					0.51833	0.00165
0.62323	0.32722					0.51932	0.00165
0.60713	0.76678					0.52032	0.00165
0.61201	1.30644					0.52131	0.00165
0.64952	0.21742					0.5223	0.00165
0.61589	1.38135					0.52329	0.00165
0.61147	0.32112					0.52428	0.00165
0.60062	1.59572					0.525	0.00165
0.60188	3.29508					0.52527	0.00165
0.61121	2.48331					0.52626	0.00165
0.58506	0.28467					0.52725	0.00165
0.63028	0.30051					0.52824	0.00165
0.62957	0.33922					0.52923	0.00165
0.60873	3.8829					0.53023	0.00165
0.60973	1.39821					0.53122	0.00165
0.62981	0.56788					0.53221	0.00165
0.61657	1.20097					0.5332	0.00165
0.64502	0.17034					0.53419	0.00165
0.62971	0.38209					0.535	0.00165
0.61102	0.80104					0.53518	0.00165
0.61511	0.75936					0.53617	0.00165
0.58977	0.83491					0.53716	0.00165
0.59307	0.86163					0.53815	0.00165
0.60196	0.84605					0.53914	0.00165
0.62813	1.07208					0.54014	0.00165
0.60661	0.27667					0.54113	0.00166
0.61522	0.37591					0.54212	0.00166
0.62252	1.44187					0.54311	0.00166
0.7348	0.08997					0.5441	0.00166
0.60852	4.6101					0.545	0.00166
0.62	0.27232					0.54509	0.00166
0.67315	0.10698					0.54608	0.00166
0.5964	1.33865					0.54707	0.00166
0.60316	2.40452					0.54806	0.00166
0.60066	0.96433					0.54905	0.00166
0.58472	0.77969					0.55005	0.00167
0.64113	0.25901					0.55104	0.00167
0.60607	0.7382					0.55203	0.00167
0.61004	2.17469					0.55302	0.00168
0.59906	1.28871					0.55401	0.00169
0.61412	1.54745					0.555	0.0017
0.66022	0.14529					0.55599	0.00172
0.60195	0.66947					0.55698	0.00174
0.61154	0.70105					0.55797	0.00177
0.62234	0.1701					0.55896	0.00181
0.60646	1.60746					0.55995	0.00186
0.71248	0.0886					0.56095	0.00192
0.62785	0.24631					0.56194	0.002
0.59448	0.93451					0.56293	0.00209
0.62733	0.43935					0.56392	0.00222
0.58605	0.1905					0.56491	0.00238
0.63673	0.25066					0.565	0.00239
0.60883	1.03562					0.5659	0.00257
0.60143	2.2744					0.56689	0.00282
0.67365	0.1692					0.56788	0.00312
0.6017	2.06298					0.56887	0.00349
0.60994	0.46236					0.56986	0.00394
0.7486	0.12431					0.57086	0.00448
0.74105	0.09377					0.57185	0.00515
0.62545	2.86876					0.57284	0.00594
0.6393	0.18291					0.57383	0.00689
0.62036	0.44726					0.57482	0.00801
0.61316	0.24601					0.575	0.00823
0.61589	1.36817					0.57581	0.00933
0.62192	0.30135					0.5768	0.01089
0.65126	0.19216					0.57779	0.0127
0.61677	0.70812					0.57878	0.01481
0.63668	0.44983					0.57977	0.01723
0.69696	0.18247					0.58077	0.02001
0.6006	0.84893					0.58176	0.02317
0.61716	0.21511					0.58275	0.02675
0.63828	0.29214					0.58374	0.03078
0.76288	0.09075					0.58473	0.03529
0.61475	0.95086					0.585	0.0366
0.69041	0.15991					0.58572	0.04029
0.61697	0.49395					0.58671	0.04581
0.60088	0.77164					0.5877	0.05187
0.6168	0.45131					0.58869	0.05846
0.61192	3.04343					0.58968	0.0656
0.61014	0.75845					0.59068	0.07327
0.60517	0.6184					0.59167	0.08146
0.73715	0.12192					0.59266	0.09013
0.64409	0.29607					0.59365	0.09924
0.60588	2.5221					0.59464	0.10875
0.60329	1.43718					0.595	0.11229
0.58901	1.12636					0.59563	0.11859
0.62515	0.37506					0.59662	0.12868
0.67912	0.10332					0.59761	0.13895
0.61541	0.67411					0.5986	0.14929
0.58845	0.57688					0.59959	0.15961
0.55691	0.29292					0.60059	0.16979
0.61169	0.28314					0.60158	0.17973
0.59269	1.82784					0.60257	0.18929
0.62834	0.56309					0.60356	0.19837
0.7731	0.08373					0.60455	0.20684
0.60236	0.8926					0.605	0.21046
0.61089	0.82085					0.60554	0.21459
0.60131	0.36115					0.60653	0.22151
0.59455	0.79476					0.60752	0.22751
0.61531	0.27778					0.60851	0.2325
0.63144	0.77853					0.6095	0.2364
0.63528	0.1639					0.6105	0.23916
0.61136	1.36374					0.61149	0.24073
0.60942	1.85216					0.61248	0.24109
0.60669	0.75577					0.61347	0.24024
0.60856	1.03113					0.61446	0.23818
0.61095	0.70141					0.615	0.23657
0.6038	0.60438					0.61545	0.23496
0.6364	0.54655					0.61644	0.23061
0.61497	0.3131					0.61743	0.22521
0.61679	0.77697					0.61842	0.21883
0.60952	0.96328					0.61941	0.21156
0.59726	1.93317					0.62041	0.2035
0.61573	0.82923					0.6214	0.19477
0.6185	1.54785					0.62239	0.18549
0.6062	0.85822					0.62338	0.17576
0.59277	1.00134					0.62437	0.16571
0.65156	0.12127					0.625	0.1592
0.63284	0.31968					0.62536	0.15546
0.607	2.41157					0.62635	0.14512
0.61891	0.33905					0.62734	0.13479
0.60506	1.40202					0.62833	0.12458
0.61962	0.84454					0.62932	0.11458
0.6116	0.98439					0.63032	0.10487
0.60792	1.34926					0.63131	0.09551
0.64204	0.36783					0.6323	0.08657
0.614	2.20351					0.63329	0.0781
0.61934	0.29549					0.63428	0.07012
0.6179	0.57182					0.635	0.06464
0.62379	2.50412					0.63527	0.06266
0.66474	0.12771					0.63626	0.05574
0.57783	0.40816					0.63725	0.04936
0.61278	0.63215					0.63824	0.04352
0.6619	0.11816					0.63923	0.03821
0.61094	0.47751					0.64023	0.03341
0.61497	1.32451					0.64122	0.0291
0.62216	0.76763					0.64221	0.02526
0.62061	0.60271					0.6432	0.02185
0.5994	0.59571					0.64419	0.01884
0.60106	0.27099					0.645	0.01667
0.59797	0.81369					0.64518	0.01621
0.61277	0.85509					0.64617	0.01392
0.59941	1.53614					0.64716	0.01194
0.62486	1.74032					0.64815	0.01023
0.66792	0.10442					0.64914	0.00877
0.71439	0.10735					0.65014	0.00753
0.61695	0.61087					0.65113	0.00648
0.60075	1.11288					0.65212	0.0056
0.64161	0.61675					0.65311	0.00486
0.62127	0.29715					0.6541	0.00425
0.5806	1.84417					0.655	0.00379
0.60373	1.19894					0.65509	0.00375
0.59959	0.91234					0.65608	0.00333
0.60967	1.27823					0.65707	0.00299
0.60233	0.67142					0.65806	0.00271
0.61953	1.29686					0.65905	0.00249
0.759	0.11382					0.66005	0.00231
0.6141	0.35536					0.66104	0.00217
0.61378	0.42022					0.66203	0.00205
0.60663	1.24392					0.66302	0.00196
0.66619	0.15056					0.66401	0.00189
0.6129	0.72995					0.665	0.00184
0.5983	3.09232					0.66599	0.00179
0.59821	0.32271					0.66698	0.00176
0.59688	2.39794					0.66797	0.00173
0.65946	0.15865					0.66896	0.00171
0.61738	0.39061					0.66995	0.0017
0.60037	0.77278					0.67095	0.00169
0.59687	0.9493					0.67194	0.00168
0.63682	1.11878					0.67293	0.00167
0.63388	0.47747					0.67392	0.00167
0.6521	0.19143					0.67491	0.00166
0.60774	1.12518					0.675	0.00166
0.60059	0.50836					0.6759	0.00166
0.59741	0.98136					0.67689	0.00166
0.62481	0.9272					0.67788	0.00166
0.62357	1.27506					0.67887	0.00166
0.62595	0.28763					0.67986	0.00166
0.59504	1.51967					0.68086	0.00166
0.63083	0.38417					0.68185	0.00166
0.59509	2.19177					0.68284	0.00166
0.61629	0.69147					0.68383	0.00166
0.62364	1.34497					0.68482	0.00165
0.59803	0.71713					0.685	0.00165
0.67033	0.13288					0.68581	0.00165
0.57194	0.1021					0.6868	0.00165
0.60403	0.52196					0.68779	0.00165
0.62549	0.57929					0.68878	0.00165
0.62252	1.92172					0.68977	0.00165
0.58691	0.20691					0.69077	0.00165
0.61359	0.72289					0.69176	0.00165
0.6191	0.93983					0.69275	0.00165
0.61606	1.5425					0.69374	0.00165
0.6102	0.67191					0.69473	0.00165
0.70908	0.0964					0.695	0.00165
0.60418	2.96688					0.69572	0.00165
0.61269	0.5839					0.69671	0.00165
0.63833	0.30724					0.6977	0.00165
0.60829	1.74583					0.69869	0.00165
0.64943	0.15752					0.69968	0.00165
0.63281	0.17838					0.70068	0.00165
0.61323	1.51154					0.70167	0.00165
0.62101	1.43574					0.70266	0.00165
0.61229	0.26964					0.70365	0.00165
0.62853	0.54546					0.70464	0.00165
0.60504	1.23638					0.705	0.00165
0.67728	0.16066					0.70563	0.00165
0.61459	1.10778					0.70662	0.00165
0.60766	0.96252					0.70761	0.00165
0.60318	0.14246					0.7086	0.00165
0.61559	1.83601					0.70959	0.00165
0.61904	0.27115					0.71059	0.00165
0.62988	1.41326					0.71158	0.00165
0.6136	2.32308					0.71257	0.00165
0.61871	2.00335					0.71356	0.00165
0.58605	0.80115					0.71455	0.00165
0.626	0.67617					0.715	0.00165
0.62661	0.25137					0.71554	0.00165
0.59494	0.69463					0.71653	0.00165
0.60402	0.5038					0.71752	0.00165
0.60642	0.4251					0.71851	0.00165
0.60949	2.55495					0.7195	0.00165
0.68201	0.13841					0.7205	0.00165
0.61099	2.48773					0.72149	0.00165
0.66721	0.1945					0.72248	0.00165
0.61773	2.41486					0.72347	0.00165
0.60899	7.33092					0.72446	0.00165
0.61602	2.33921					0.725	0.00165
0.60484	1.76318					0.72545	0.00165
0.61744	0.19854					0.72644	0.00165
0.60047	1.63156					0.72743	0.00165
0.68635	0.15614					0.72842	0.00165
0.6023	2.70786					0.72941	0.00165
0.62605	0.50535					0.73041	0.00165
0.6193	0.90062					0.7314	0.00165
0.60545	1.22135					0.73239	0.00165
0.63254	0.51348					0.73338	0.00165
0.71212	0.10277					0.73437	0.00165
0.62667	0.20532					0.735	0.00165
0.73379	0.09524					0.73536	0.00165
0.61096	0.73593					0.73635	0.00165
0.68438	0.217					0.73734	0.00165
0.62624	1.86694					0.73833	0.00165
0.62214	0.34159					0.73932	0.00165
0.60155	2.45647					0.74032	0.00165
0.63158	0.67526					0.74131	0.00165
0.59723	1.36283					0.7423	0.00165
0.60542	2.75524					0.74329	0.00165
0.61513	0.58605					0.74428	0.00165
0.62512	0.25305					0.745	0.00165
0.62221	0.21539					0.74527	0.00165
0.61467	1.34921					0.74626	0.00165
0.63749	1.3643					0.74725	0.00165
0.63735	0.45364					0.74824	0.00165
0.66879	0.13812					0.74923	0.00165
0.60157	1.21083					0.75023	0.00165
0.60737	2.32375					0.75122	0.00165
0.63233	0.24406					0.75221	0.00165
0.61467	1.92297					0.7532	0.00165
0.63808	0.13536					0.75419	0.00165
0.60511	1.85804					0.755	0.00165
0.62138	1.728					0.75518	0.00165
0.61959	0.63276					0.75617	0.00165
0.69192	0.09102					0.75716	0.00165
0.62267	1.64443					0.75815	0.00165
0.62603	0.39074					0.75914	0.00165
0.61888	0.5421					0.76014	0.00165
0.63357	0.56976					0.76113	0.00165
0.63368	0.34792					0.76212	0.00165
0.60984	0.20291					0.76311	0.00165
0.63145	0.24779					0.7641	0.00165
0.60964	5.93033					0.765	0.00165
0.61804	1.68442					0.76509	0.00165
0.66987	0.25023					0.76608	0.00165
0.60166	1.09449					0.76707	0.00165
0.68909	0.09519					0.76806	0.00165
0.6392	0.30657					0.76905	0.00165
0.61174	0.5943					0.77005	0.00165
0.63058	0.47567					0.77104	0.00165
0.62747	0.73335					0.77203	0.00165
0.60345	3.13931					0.77302	0.00165
0.61146	0.76659					0.77401	0.00165
0.60893	0.50664					0.775	0.00165
0.61978	0.71097					0.77599	0.00165
0.61674	0.87895					0.77698	0.00165
0.61895	0.27227					0.77797	0.00165
0.5958	0.61063					0.77896	0.00165
0.59377	0.42696					0.77995	0.00165
0.63102	0.36601					0.78095	0.00165
0.61345	1.61996					0.78194	0.00165
0.60238	0.83874					0.78293	0.00165
0.59812	1.55098					0.78392	0.00165
0.60225	2.13255					0.78491	0.00165
0.60194	0.70892					0.785	0.00165
0.63901	0.2459					0.7859	0.00165
0.6084	0.67087					0.78689	0.00165
0.6135	1.38497					0.78788	0.00165
0.59569	1.99766					0.78887	0.00165
0.60624	2.39651					0.78986	0.00165
0.60841	0.52596					0.79086	0.00165
0.66716	0.23149					0.79185	0.00165
0.61109	1.78286					0.79284	0.00165
0.61325	0.72339					0.79383	0.00165
0.5729	0.81542					0.79482	0.00165
0.60801	0.31876					0.795	0.00165
0.6223	1.82021					0.79581	0.00165
0.62519	0.41569					0.7968	0.00165
0.63017	0.2201					0.79779	0.00165
0.66146	0.13589					0.79878	0.00165
0.60494	1.88427					0.79977	0.00165
0.61845	0.53764					0.80077	0.00165
0.72791	0.09917					0.80176	0.00165
0.59871	1.29898					0.80275	0.00165
0.69274	0.0959					0.80374	0.00165
0.62334	0.51649					0.80473	0.00165
0.63479	0.47798					0.805	0.00165
0.61528	3.85424					0.80572	0.00165
0.60343	0.85278					0.80671	0.00165
0.62638	1.11464					0.8077	0.00165
0.64608	0.16346					0.80869	0.00165
0.61412	0.58281					0.80968	0.00165
0.60736	2.63089					0.81068	0.00165
0.61705	1.66345					0.81167	0.00165
0.59406	1.78492					0.81266	0.00165
0.69236	0.10922					0.81365	0.00165
0.62085	0.20705					0.81464	0.00165
0.60506	0.74061					0.815	0.00165
0.61861	1.33121					0.81563	0.00165
0.60375	1.52786					0.81662	0.00165
0.60512	0.9449					0.81761	0.00165
0.59747	0.93248					0.8186	0.00165
0.60178	2.03164					0.81959	0.00165
0.60984	0.90877					0.82059	0.00165
0.59714	0.6864					0.82158	0.00165
0.61867	1.01018					0.82257	0.00165
0.62044	0.59367					0.82356	0.00165
0.71228	0.14562					0.82455	0.00165
0.59705	1.42649					0.825	0.00165
0.59915	0.90196					0.82554	0.00165
0.62153	1.04727					0.82653	0.00165
0.61996	0.74252					0.82752	0.00165
0.60208	1.51772					0.82851	0.00165
0.6371	0.29545					0.8295	0.00165
0.62109	0.67492					0.8305	0.00165
0.70893	0.12465					0.83149	0.00165
0.65195	0.15903					0.83248	0.00165
0.61829	0.24335					0.83347	0.00165
0.62385	0.75876					0.83446	0.00165
0.60916	1.67604					0.835	0.00165
0.67237	0.21313					0.83545	0.00165
0.58869	1.04969					0.83644	0.00165
0.67081	0.18788					0.83743	0.00165
0.65084	0.17506					0.83842	0.00165
0.62619	0.15464					0.83941	0.00165
0.60843	2.93204					0.84041	0.00165
0.60407	0.1959					0.8414	0.00165
0.77915	0.1009					0.84239	0.00165
0.61378	1.39433					0.84338	0.00165
0.59856	3.7873					0.84437	0.00165
0.60012	0.63934					0.845	0.00165
0.60143	1.23984					0.84536	0.00165
0.60703	0.85581					0.84635	0.00165
0.59897	0.97642					0.84734	0.00165
0.61586	0.17467					0.84833	0.00165
0.60772	1.02222					0.84932	0.00165
0.59327	0.99112					0.85032	0.00165
0.60125	0.32496					0.85131	0.00165
0.62795	0.54459					0.8523	0.00165
0.61343	0.67538					0.85329	0.00165
0.60754	0.73225					0.85428	0.00165
0.61288	0.47579					0.855	0.00165
0.6005	0.73569					0.85527	0.00165
0.57713	3.45746					0.85626	0.00165
0.5938	0.21087					0.85725	0.00165
0.60062	1.02935					0.85824	0.00165
0.62547	1.16344					0.85923	0.00165
0.62479	0.39855					0.86023	0.00165
0.762	0.07433					0.86122	0.00165
0.76184	0.08337					0.86221	0.00165
0.61188	1.68234					0.8632	0.00165
0.60438	0.23389					0.86419	0.00165
0.61129	1.4235					0.865	0.00165
0.64577	0.19221					0.86518	0.00165
0.60098	0.90201					0.86617	0.00165
0.61359	1.68465					0.86716	0.00165
0.64781	0.14507					0.86815	0.00165
0.60068	0.74752					0.86914	0.00165
0.64301	0.39602					0.87014	0.00165
0.59071	0.29613					0.87113	0.00165
0.60037	1.10585					0.87212	0.00165
0.60984	0.82256					0.87311	0.00165
0.5985	0.9866					0.8741	0.00165
0.60783	0.25795					0.875	0.00165
0.71984	0.12638					0.87509	0.00165
0.6178	0.97379					0.87608	0.00165
0.6534	0.18201					0.87707	0.00165
0.63752	0.38504					0.87806	0.00165
0.60586	2.71823					0.87905	0.00165
0.60381	4.36743					0.88005	0.00165
0.60709	0.6585					0.88104	0.00165
0.60894	0.94754					0.88203	0.00165
0.61017	0.58848					0.88302	0.00165
0.65103	0.37948					0.88401	0.00165
0.69834	0.09279					0.885	0.00165
0.63323	0.41667					0.885	0.00165
0.61152	1.26751					0.88599	0.00165
0.61475	0.42318					0.88698	0.00165
0.61451	0.48513					0.88797	0.00165
0.59077	0.61841					0.88896	0.00165
0.62482	1.54491					0.88995	0.00165
0.61093	0.4038					0.89095	0.00165
0.61257	2.0601					0.89194	0.00165
0.60038	1.35122					0.89293	0.00165
0.60952	0.32635					0.89392	0.00165
0.59287	0.90016					0.89491	0.00165
0.64722	0.25894					0.895	0.00165
0.59512	0.73143					0.8959	0.00165
0.67568	0.11409					0.89689	0.00165
0.61326	3.48233					0.89788	0.00165
0.61828	1.06309					0.89887	0.00165
0.60084	0.49219					0.89986	0.00165
0.61854	1.67661					0.90086	0.00165
0.61314	1.4261					0.90185	0.00165
0.60661	1.34352					0.905	0.00165
0.60613	1.80217					0.915	0.00165
0.60646	0.61104					0.925	0.00165
0.60975	0.5995					0.935	0.00165
0.58717	0.47146					0.945	0.00165
0.6282	0.51726					0.955	0.00165
0.60984	0.74788					0.965	0.00165
0.64849	0.16825					0.975	0.00165
0.64222	0.21568					0.985	0.00165
0.64219	0.43167					0.995	0.00165
0.59816	0.56119
0.65576	0.2021
0.61525	1.55472
0.60111	4.37657
0.63784	0.1334
0.62438	2.37432
0.60305	0.72329
0.60865	0.57155
0.59274	0.25989
0.62002	0.75642
0.61333	1.19525
0.61665	1.22555
0.71644	0.11305
0.60572	0.66817
0.63622	0.81949
0.5997	0.87472
0.61558	0.56735
0.61583	0.46142
0.62072	1.27917
0.60389	1.7829
0.60073	2.34742
0.62549	0.34946
0.60887	0.34433
0.59681	1.55377
0.59278	4.41011
0.58538	0.28608
0.6166	1.60616
0.61924	2.06618
0.62052	0.45514
0.57718	0.66485
0.61449	4.19636
0.75494	0.06113
0.63315	0.88427
0.61558	0.78711
0.60431	2.53184
0.59627	2.02182
0.63046	0.9122
0.60738	0.65196
0.61245	2.01083
0.63563	0.29773
0.6138	0.81015
0.6149	1.28526
0.63479	0.57459
0.59987	0.63165
0.59784	1.65125
0.58984	2.58058
0.60112	1.27702
0.60569	0.88548
0.59227	0.64749
0.62756	0.55317
0.64404	0.2446
0.59916	0.98818
0.62846	2.06996
0.62637	0.31791
0.65251	0.22153
0.60911	0.30035
0.59655	1.72794
0.60449	0.90686
0.59946	0.64856
0.62632	0.76687
0.60791	1.05448
0.63137	0.26052
0.62471	0.29369
0.60669	1.4156
0.61328	0.99497
0.61641	0.69891
0.59897	0.967
0.61132	1.4048
0.61157	0.48984
0.60457	0.75287
0.71343	0.09925
0.61441	0.48526
0.60762	2.82204
0.63681	0.14638
0.63427	0.26136
0.63336	0.38265
0.59623	0.41476
0.61214	0.77714
0.5998	2.0918
0.6357	0.75044
0.60383	1.31904
0.60806	1.16295
0.63521	0.16664
0.60297	1.00944
0.71647	0.11208
0.66054	0.19192
0.67318	0.13831
0.61472	0.34538
0.66052	0.289
0.59572	0.3447
0.606	0.69332
0.61087	0.67585
0.59364	1.4728
0.59902	0.18785
0.61225	0.75828
0.60866	1.69692
0.61887	0.29359
0.64278	0.87159
0.60136	4.26387
0.60718	2.42595
0.63578	1.26817
0.63289	0.23731
0.63625	0.26353
0.65083	1.68496
0.61921	1.27745
0.58132	0.34107
0.59449	3.13185
0.60457	0.35085
0.61209	1.08055
0.60793	0.55216
0.61822	0.65363
0.61204	1.11138
0.65166	0.32772
0.61286	1.88944
0.67409	0.16728
0.62033	1.11027
0.60948	1.34325
0.61345	0.74209
0.59384	0.73973
0.60939	3.2602
0.60917	1.08733
0.605	0.44856
0.60588	1.36805
0.62897	0.16115
0.62452	0.3438
0.61151	0.5188
0.65604	0.48007
0.64395	0.19866
0.6139	0.91339
0.64169	0.15532
0.6144	1.95568
0.62097	0.58769
0.60934	1.66341
0.60412	0.48557
0.6004	0.85808
0.60841	4.07196
0.63644	0.33134
0.59617	0.57735
0.61533	0.39484
0.60187	1.41323
0.6011	1.91392
0.6525	0.20634
0.60136	0.8511
0.59822	6.85689
0.61318	0.73579
0.58792	0.52568
0.61161	1.98878
0.61034	1.2578
0.60903	1.44732
0.58613	1.68847
0.68806	0.12782
0.60904	2.09967
0.62125	0.92982
0.74886	0.06862
0.62108	0.54424
0.60175	1.88833
0.63462	0.40095
0.61404	0.41587
0.63607	0.45587
0.60886	1.10687
0.60261	1.66743
0.74141	0.07973
0.6041	1.16512
0.62124	1.56317
0.61904	1.63095
0.61174	1.40028
0.61282	0.53132
0.61102	1.03833
0.6182	0.56599
0.61888	0.35829
0.61543	1.0008
0.61407	1.04489
0.59066	1.23022
0.63003	0.4069
0.60023	1.55789
0.63982	0.39104
0.76701	0.07792
0.63184	0.28186
0.66911	0.2199
0.61901	0.88002
0.59791	1.27053
0.61053	0.38045
0.62736	0.26075
0.61237	3.49093
0.61732	0.26838
0.59495	2.46661
0.59652	2.72709
0.59504	1.20963
0.61609	1.38866
0.61677	3.20725
0.74579	0.10485
0.59259	0.95154
0.67641	0.11446
0.60789	1.32642
0.63753	0.24026
0.63037	0.99043
0.60492	0.50861
0.61021	1.33401
0.61918	0.27313
0.6385	0.15187
0.59363	1.22774
0.61876	0.44299
0.60725	1.63351
0.59777	2.39778
0.62603	0.83221
0.59765	0.90093
0.59698	0.57085
0.61545	1.39131
0.62746	0.71861
0.63473	0.59783
0.62088	2.00271
0.61876	1.96009
0.61521	2.4312
0.60708	3.96851
0.6057	0.81022
0.65681	0.38125
0.70789	0.12862
0.69574	0.12239
0.64477	0.41415
0.61373	0.75882
0.61479	1.79561
0.61197	0.86035
0.6225	0.58241
0.58955	0.44226
0.61861	1.34651
0.61654	2.6395
0.61192	1.95576
0.61466	2.38022
0.71575	0.10811
0.60127	0.65752
0.60145	0.65637
0.60008	0.7573
0.62843	0.2062
0.60435	1.09332
0.59484	0.72642
0.60701	0.56795
0.63923	0.50359
0.63472	0.29055
0.611	1.5874
0.75096	0.10077
0.58725	1.4059
0.60929	0.31179
0.6096	0.89538
0.6103	1.11369
0.6099	2.01402
0.64008	0.32648
0.61713	0.63395
0.61034	0.61866
0.60043	1.46886
0.73078	0.09981
0.60071	1.32212
0.59843	0.92552
0.62177	0.54479
0.61606	2.01788
0.62545	0.60393
0.5985	0.5221
0.63143	0.3115
0.61875	1.08713
0.6192	0.97058
0.63716	0.14702
0.62518	0.21657
0.61514	0.49811
0.60361	0.76342
0.61355	0.40939
0.62047	1.83487
0.5969	1.12994
0.58949	2.46763
0.61146	0.72385
0.64764	0.17835
0.59154	3.45145
0.61878	3.00456
0.61002	2.71811
0.5933	2.89921
0.63234	0.52965
0.60047	2.99168
0.61153	0.95884
0.6143	0.56619
0.59585	0.4765
0.61519	1.23193
0.58735	3.04092
0.60724	1.12267
0.59723	0.92716
0.62349	0.63379
0.6039	2.8444
0.61513	0.87799
0.62317	0.97148
0.62865	0.48919
0.6219	1.2408
0.62808	0.90767
0.60926	2.13061
0.62761	0.46274
0.62644	0.17548
0.61497	0.72229
0.57732	1.85987
0.67051	0.14303
0.59649	4.11382
0.63021	0.53819
0.60558	3.3461
0.61056	0.33922
0.61063	1.86602
0.61718	1.61896
0.60222	2.40203
0.61217	1.8142
0.61431	1.22332
0.6362	0.28056
0.62044	0.34916
0.60459	4.04707
0.62654	0.61969
0.45666	0.11118
0.60538	3.5817
0.60459	0.60182
0.61372	1.98286
0.6283	0.56755
0.75399	0.0842
0.63799	0.17291
0.66058	0.18082
0.66673	0.19042
0.68177	0.13128
0.6027	1.03568
0.59595	0.2209
0.61893	0.4427
0.60796	0.51125
0.61469	4.29479
0.59355	1.64884
0.63689	0.23577
0.63071	0.19552
0.61244	0.87361
0.62104	0.70171
0.62276	0.66551
0.72738	0.10567
0.60235	1.3622
0.62432	1.19419
0.61878	1.37963
0.61548	0.57332
0.61508	1.74531
0.61984	0.58581
0.61692	0.89837
0.60101	1.8695
0.61742	1.3918
0.6382	0.21857
0.6144	0.96324
0.59624	0.53738
0.62652	0.6094
0.59472	1.92539
0.58718	0.94146
0.61441	2.09444
0.65206	0.15454
0.66374	0.12988
0.48792	0.14221
0.62748	0.34742
0.59853	0.63169
0.61341	0.28771
0.61528	3.50615
0.62595	0.44292
0.63799	0.387
0.62184	0.97444
0.62398	0.92768
0.63769	0.35113
0.60754	3.48029
0.60569	0.6488
0.6018	1.45127
0.58953	1.51029
0.59157	0.62935
0.65123	0.29122
0.72957	0.08599
0.59582	1.3593
0.60586	1.24182
0.60813	0.95694
0.73429	0.10007
0.60357	0.74609
0.63521	0.12193
0.60619	2.09079
0.60212	0.67873
0.60583	0.36205
0.65211	0.17168
0.61705	0.31972
0.66675	0.17061
0.61674	0.62554
0.52816	0.26637
0.62274	0.83197
0.60499	1.37526
0.63472	0.30644
0.626	0.8366
0.59465	0.31482
0.62517	0.56226
0.61135	0.26386
0.64765	0.25012
0.60601	0.72783
0.60823	1.2124
0.62081	0.83954
0.6135	1.21616
0.60702	0.67947
0.59457	1.15093
0.62469	0.46328
0.72139	0.12429
0.68931	0.16415
0.6208	0.42117
0.6165	0.48664
0.61714	0.65579
0.59585	1.37028
0.59587	1.56893
0.59244	3.7916
0.61685	1.45125
0.6411	0.19657
0.61933	0.36247
0.60041	1.0425
0.62333	0.35968
0.66006	0.17364
0.6122	0.64777
0.62749	0.74036
0.6037	1.12602
0.626	0.20348
0.5964	0.55448
0.66465	0.13171
0.61221	1.54431
0.60951	0.86531
0.64437	0.19672
0.62357	1.4741
0.62715	0.42352
0.59929	2.05471
0.65468	0.23663
0.61054	0.41487
0.58253	1.99247
0.59647	0.93091
0.61263	1.55927
0.61085	1.61843
0.63207	0.28497
0.62149	0.25151
0.61466	0.96826
0.60898	1.08978
0.62027	0.74238
0.67162	0.13112
0.60661	1.18006
0.60024	0.75573
0.59492	0.47858
0.74272	0.09234
0.64313	0.28859
0.60871	0.65894
0.60425	1.91101
0.61171	1.94786
0.61842	0.38524
0.59111	1.11158
0.65633	0.29259
0.60616	0.87719
0.62505	0.79466
0.62335	0.72713
0.62759	0.15451
0.69027	0.12083
0.68828	0.11885
0.59923	1.0721
0.6127	1.01553
0.61846	1.09945
0.62414	1.07166
0.61367	0.64588
0.71383	0.08848
0.60316	1.13172
0.64043	0.29468
0.61215	0.98426
0.62212	0.36372
0.66278	0.28052
0.65499	0.12307
0.60912	0.45254
0.60794	0.94237
0.5976	0.34195
0.74025	0.12083
0.62863	0.81931
0.62483	1.67876
0.59874	1.08596
0.60248	4.77062
0.60807	1.35911
0.64153	0.20987
0.61913	1.00574
0.60796	1.80785
0.60792	0.77886
0.74764	0.08003
0.62691	0.60135
0.58706	0.86935
0.61264	0.42629
0.69048	0.10561
0.63369	0.2911
0.59084	0.47796
0.62635	0.23909
0.61953	1.07184
0.78581	0.07714
0.62435	0.91139
0.59283	1.22997
0.57685	1.66346
0.61614	0.86737
0.55185	3.80292
0.60318	0.59469
0.70852	0.14595
0.77843	0.06136
0.63084	0.34824
0.62521	0.21856
0.60317	0.4188
0.60063	0.75413
0.7171	0.10023
0.61237	0.32297
0.56741	0.1828
0.61319	1.91611
0.60801	0.68142
0.63429	0.30121
0.64237	0.1507
0.60046	0.67869
0.63657	0.40712
0.62676	0.92369
0.61053	0.74224
0.63803	0.46573
0.6137	1.32857
0.61529	3.48422
0.67155	0.17159
0.68283	0.13961
0.61301	0.81214
0.6688	0.18767
0.6178	0.18953
0.60879	2.4632
0.61987	2.29488
0.62636	0.42712
0.61926	0.22812
0.72754	0.10608
0.60271	0.53151
0.61221	0.25113
0.60349	1.60484
0.62167	0.88306
0.61491	1.78644
0.63083	0.10667
0.61488	1.47122
0.63558	0.47073
0.62352	1.71265
0.6211	0.29351
0.59679	0.58998
0.73092	0.11075
0.72014	0.1081
0.62103	0.28675
0.59634	3.27747
0.6244	0.86447
0.63554	0.32687
0.62102	0.88835
0.62508	1.51733
0.62517	0.36714
0.70546	0.11245
0.59743	0.82646
0.63061	0.42518
0.61131	0.29149
0.60993	2.53316
0.61026	0.60359
0.61387	1.36156
0.62412	0.18355
0.60907	2.3824
0.61567	0.21106
0.6159	1.53105
0.6097	0.45418
0.60041	2.61508
0.67158	0.12629
0.66044	0.24346
0.73979	0.08521
0.66652	0.13732
0.59912	0.90621
0.59758	1.07546
0.62135	0.7465
0.69127	0.12086
0.61189	1.07007
0.59855	0.89076
0.66026	0.12324
0.62399	0.70543
0.62382	1.26707
0.64703	0.26518
0.60848	1.35929
0.60588	0.93082
0.59952	0.58324
0.6177	0.43024
0.6175	0.67797
0.71084	0.10071
0.59928	0.9982
0.61629	0.99962
0.62419	1.92011
0.62751	0.66241
0.60853	2.52424
0.62102	1.53878
0.60871	0.3299
0.6226	0.40781
0.65762	0.11531
0.72618	0.23901
0.60526	3.64295
0.58074	2.24917
0.60679	1.54528
0.62833	0.62019
0.66989	0.15734
0.61576	0.17378
0.60923	4.3787
0.61259	0.75604
0.60674	1.29004
0.63247	0.31803
0.75509	0.07365
0.64543	0.69954
0.60278	0.54745
0.61495	0.36715
0.59885	0.52583
0.61503	2.86335
0.61923	0.66117
0.62215	0.4279
0.63528	0.52344
0.60041	1.01417
0.65121	0.1195
0.59387	1.73223
0.61674	1.01225
0.624	0.64138
0.61513	0.2774
0.63921	0.12766
0.60593	0.57556
0.63291	0.223
0.61462	1.42622
0.60433	4.40664
0.62644	0.74292
0.60929	0.92429
0.63236	0.44524
0.6024	0.58744
0.6434	0.18534
0.65141	0.2465
0.60802	0.35448
0.59822	1.44008
0.61844	0.31721
0.58842	0.63587
0.61948	0.76578
0.61712	0.68038
0.62148	0.3106
0.59529	0.59856
0.61885	0.70801
0.61935	0.56066
0.72428	0.08101
0.66148	0.21086
0.59896	0.5446
0.53713	2.35164
0.67706	0.12281
0.61442	0.2392
0.6152	3.38401
0.61537	0.80221
0.62942	2.53134
0.63205	0.31022
0.64117	0.35974
0.61064	3.11028
0.59519	0.44514
0.6152	1.21333
0.59467	1.89604
0.59724	0.19086
0.63102	0.74016
0.62736	0.45116
0.6533	0.31817
0.62197	1.00789
0.63339	0.22147
0.61783	1.19385
0.59793	0.45433
0.61462	0.40539
0.6214	0.278
0.6235	1.41036
0.60723	1.38761
0.59599	2.41186
0.6361	0.21355
0.60394	1.3024
0.60876	4.12022
0.60663	0.8879
0.64297	0.15031
0.59489	0.38226
0.61943	1.55942
0.62023	2.99431
0.58532	0.27387
0.6159	1.34624
0.59801	0.23945
0.62468	0.25924
0.59216	0.71551
0.60654	0.45253
0.61402	0.65599
0.62091	2.28326
0.72072	0.09985
0.61048	0.41026
0.60166	1.93215
0.73322	0.09576
0.60785	0.36245
0.60992	4.27584
0.6061	4.44799
0.60034	0.8465
0.63103	0.20347
0.63535	0.28229
0.60291	1.02305
0.6213	0.25129
0.59554	1.43981
0.60875	2.62747
0.62926	0.95336
0.6458	0.35358
0.64262	0.28091
0.59844	1.84465
0.62397	0.776
0.58562	1.48608
0.63169	0.48701
0.63332	0.69918
0.62993	0.3276
0.62053	0.47112
0.62231	0.38305
0.61353	3.6901
0.59852	4.98002
0.60135	1.46322
0.63922	0.42298
0.64379	0.12948
0.62019	0.53005
0.62163	0.33528
0.61129	1.61233
0.7425	0.07578
0.61863	0.83764
0.62722	0.33459
0.60995	3.19752
0.58999	0.87975
0.60141	1.69539
0.60183	2.99787
0.61506	2.56383
0.60635	1.37745
0.6149	1.32573
0.69432	0.128
0.6346	0.39304
0.63257	0.38987
0.63242	0.30965
0.61246	0.36388
0.60872	0.79892
0.60947	0.64645
0.61008	1.28705
0.61891	0.73895
0.70983	0.07592
0.79118	0.06117
0.59794	1.14277
0.62513	1.50985
0.6077	0.55445
0.60751	0.40657
0.61011	0.37182
0.61491	1.12249
0.61778	0.76502
0.60165	1.34213
0.59712	1.18918
0.62162	0.84313
0.49019	3.12328
0.62017	1.04475
0.58788	0.36362
0.61051	0.77029
0.56421	0.20371
0.61279	0.36692
0.58514	1.19443
0.63585	0.19865
0.58889	1.18658
0.61202	0.43847
0.62696	0.17389
0.63037	0.30616
0.61176	1.05895
0.59424	0.55023
0.597	2.11966
0.60661	0.7442
0.68521	0.10802
0.67414	0.18974
0.60047	0.40893
0.60617	0.88237
0.61615	2.20444
0.61112	1.20201
0.67897	0.08821
0.62422	0.28751
0.66011	0.16409
0.60493	1.16264
0.69626	0.11185
0.62436	1.37888
0.60556	1.0096
0.59236	0.36335
0.6001	1.50631
0.56882	0.27003
0.65138	0.42531
0.70332	0.08903
0.61248	1.30263
0.63468	0.27967
0.60389	0.5319
0.61958	1.0377
0.62664	0.24718
0.59003	0.6093
0.61291	1.47671
0.64657	0.14287
0.61287	3.20011
0.59547	1.48399
0.61501	1.44193
0.64888	0.41227
0.60498	2.29574
0.66978	0.16759
0.61096	1.36857
0.6333	3.07163
0.68352	0.12211
0.63164	0.41504
0.62274	1.68616
0.6191	1.4685
0.62518	0.16287
0.61112	0.66989
0.63273	0.21006
0.60316	1.54413
0.63554	0.14668
0.63429	0.29207
0.61337	1.29467
0.61326	0.78824
0.64863	0.30625
0.60727	1.36751
0.60116	1.72687
0.63672	0.18453
0.61252	1.3708
0.59668	0.9789
0.61939	1.35064
0.61849	0.43158
0.64295	0.24711
0.60644	0.80853
0.60966	1.05645
0.6757	0.14321
0.60785	0.85122
0.59914	1.19016
0.61506	0.58815
0.59739	1.10747
0.6362	0.69259
0.62293	1.09386
0.60118	2.64343
0.58947	3.9378
0.71627	0.0964
0.61389	2.37703
0.67523	0.15578
0.67139	0.16606
0.60092	1.16894
0.62506	0.40251
0.62704	0.24346
0.60763	1.36279
0.61357	0.79169
0.63118	0.41887
0.59742	4.00361
0.59696	1.14827
0.59955	1.44405
0.63383	0.63306
0.63641	0.14682
0.60081	1.54644
0.69757	0.0991
0.61821	0.61511
0.60336	0.61168
0.63372	0.72892
0.61137	1.19068
0.58436	0.22469
0.6097	1.08088
0.60559	0.22483
0.63852	0.55032
0.5892	0.92846
0.6125	0.79385
0.59861	0.6175
0.64239	0.18516
0.58778	2.08745
0.59009	0.75172
0.60061	0.82607
0.68573	0.15929
0.60367	1.14722
0.60298	0.36154
0.59505	4.13835
0.62935	1.81417
0.60707	1.44689
0.60721	0.89636
0.59916	0.3999
0.60624	0.15059
0.60029	0.70682
0.60747	0.53511
0.62091	1.89822
0.60014	0.50786
0.69613	0.13915
0.60081	0.59646
0.59683	0.82461
0.61386	1.5598
0.59998	2.07401
0.58279	1.07724
0.60011	0.6232
0.61845	1.06326
0.44243	0.99076
0.60828	1.57502
0.60947	1.25955
0.61957	1.31109
0.61826	0.59697
0.63307	0.7482
0.6078	1.10664
0.61009	2.22777
0.62914	1.2836
0.6113	2.75858
0.71381	0.11185
0.60903	1.46019
0.60519	0.22247
0.60076	0.46701
0.60801	1.41585
0.61019	0.27596
0.6266	0.21927
0.635	0.33992
0.60032	1.25407
0.61531	0.366
0.62266	0.83713
0.61052	2.25698
0.62775	0.31243
0.60364	2.11473
0.62435	0.67735
0.61581	0.33172
0.60617	2.15066
0.59277	1.20032
0.63118	0.73244
0.61861	0.14209
0.63204	0.42061
0.58304	0.83487
0.62808	0.16448
0.6125	0.94484
0.63188	1.82791
0.61725	1.35057
0.61584	0.65951
0.59375	3.36458
0.61115	0.42427
0.61959	0.46856
0.59822	0.73554
0.61155	0.81056
0.61738	3.02692
0.60265	0.60519
0.62276	2.99096
0.70974	0.17643
0.61693	0.80209
0.60751	1.37533
0.5949	1.13366
0.61934	0.93013
0.60749	0.33516
0.61064	0.28689
0.59067	1.51299
0.60618	2.96436
0.61268	0.84756
0.60579	1.71701
0.60083	1.08722
0.6183	1.36567
0.76289	0.06929
0.61514	0.69769
0.70859	0.0943
0.57764	0.83904
0.59632	2.7917
0.73787	0.1072
0.62196	0.52025
0.60213	1.18776
0.61276	0.47144
0.6061	0.56947
0.62645	0.4992
0.61681	1.78077
0.60221	1.58786
0.60778	1.84638
0.72656	0.10079
0.5902	1.79917
0.62428	1.8073
0.71295	0.10086
0.62641	0.13816
0.63027	0.19905
0.61701	1.50946
0.60522	1.61812
0.61054	0.33784
0.66866	0.2152
0.59996	2.43128
0.64189	0.15714
0.59909	0.55981
0.60225	0.43234
0.63883	0.20378
0.6097	1.17335
0.62042	1.3361
0.6109	1.1006
0.60158	0.95826
0.6211	0.35296
0.63817	0.15098
0.61075	2.18162
0.60765	2.16368
0.57365	3.12485
0.63723	0.24555
0.63624	0.31286
0.60573	1.81574
0.62624	0.89263
0.6156	0.43557
0.66684	0.13344
0.62163	1.45232
0.62072	1.17405
0.62118	0.80686
0.62921	0.53162
0.62109	0.91571
0.63253	0.50046
0.61973	1.04482
0.63296	0.17012
0.61303	0.60438
0.61599	0.68571
0.61369	1.92978
0.60819	1.25513
0.61776	0.5639
0.73277	0.08187
0.61425	1.97756
0.63549	0.44319
0.6079	0.74193
0.63825	0.35662
0.71201	0.09325
0.59893	3.9837
0.60398	0.50982
0.63074	0.47601
0.61461	2.39355
0.6032	2.72275
[truncated: 18,097 more rows]

## Sheet: Fig. 4c
voltage (mV)	purity-1	purity-2	purity-3	purity mean	purity s. d.
-35	99.9432	99.2006	99.9462	99.6967	0.42965
-40	90.9157	92.5414	91.0048	91.4873	0.91396
-45	88.0858	90.1365	89.5747	89.2657	1.05974
-50	87.7329	87.688	81.8118	85.7442	3.40567
-60	48.0423	50.1653	46.9844	48.3973	1.61993
-55	78.4509	78.2879	77.4416	78.0601	0.54183

## Sheet: Fig. 4h
BlockDepth	Restime (ms)		Gaussian-fitting
0.60283	4.62608		0.005	0.00154
0.58771	1.30715		0.00698	0.00154
0.61706	1.28086		0.00797	0.00154
0.59487	0.76581		0.00896	0.00154
0.60024	3.40677		0.00995	0.00154
0.59265	3.00681		0.01095	0.00154
0.60032	0.36374		0.01194	0.00154
0.60141	0.35576		0.01293	0.00154
0.59752	2.12996		0.01392	0.00154
0.6016	1.00204		0.01491	0.00154
0.5947	0.69628		0.015	0.00154
0.59904	1.56159		0.0159	0.00154
0.61092	0.52263		0.01689	0.00154
0.5938	0.66963		0.01788	0.00154
0.60568	0.91544		0.01887	0.00154
0.59954	2.14401		0.01986	0.00154
0.51768	5.81314		0.02086	0.00154
0.60139	1.41544		0.02185	0.00154
0.58906	0.36424		0.02284	0.00154
0.5784	0.3237		0.02383	0.00154
0.60487	0.63633		0.02482	0.00154
0.59183	1.2633		0.025	0.00154
0.60546	0.83064		0.02581	0.00154
0.59714	0.7353		0.0268	0.00154
0.59475	1.08831		0.02779	0.00154
0.59569	1.25297		0.02878	0.00154
0.46137	0.63156		0.02977	0.00154
0.61257	0.32591		0.03077	0.00154
0.61853	0.83862		0.03176	0.00154
0.60571	0.67965		0.03275	0.00154
0.61225	1.66022		0.03374	0.00154
0.61153	0.43982		0.03473	0.00154
0.61932	0.37361		0.035	0.00154
0.59361	1.32925		0.03572	0.00154
0.58836	1.33038		0.03671	0.00154
0.57916	1.27322		0.0377	0.00154
0.57062	21.6061		0.03869	0.00154
0.6012	0.24969		0.03968	0.00154
0.5963	1.108		0.04068	0.00154
0.61498	0.23384		0.04167	0.00154
0.60347	0.62689		0.04266	0.00154
0.60449	0.59973		0.04365	0.00154
0.50754	0.79068		0.04464	0.00154
0.6141	0.78666		0.045	0.00154
0.58684	1.43526		0.04563	0.00154
0.54164	0.20326		0.04662	0.00154
0.61513	1.51541		0.04761	0.00154
0.58037	1.27892		0.0486	0.00154
0.60021	1.14226		0.04959	0.00154
0.48383	2.11927		0.05059	0.00154
0.59053	1.41372		0.05158	0.00154
0.60272	0.67406		0.05257	0.00154
0.60211	1.41576		0.05356	0.00154
0.59703	0.59188		0.05455	0.00154
0.6108	0.56216		0.055	0.00154
0.6034	0.62755		0.05554	0.00154
0.5883	2.92958		0.05653	0.00154
0.60334	0.75101		0.05752	0.00154
0.58244	0.2462		0.05851	0.00154
0.58753	0.6674		0.0595	0.00154
0.59389	1.35781		0.0605	0.00154
0.60414	0.64		0.06149	0.00154
0.61874	0.53595		0.06248	0.00154
0.60169	0.89045		0.06347	0.00154
0.60179	1.11093		0.06446	0.00154
0.60443	0.31075		0.065	0.00154
0.566	4.5924		0.06545	0.00154
0.58571	0.81013		0.06644	0.00154
0.61451	0.27284		0.06743	0.00154
0.60976	0.31715		0.06842	0.00154
0.58809	0.91295		0.06941	0.00154
0.58365	2.00456		0.07041	0.00154
0.58272	1.20207		0.0714	0.00154
0.60406	1.51436		0.07239	0.00154
0.5894	0.30739		0.07338	0.00154
0.56902	0.85968		0.07437	0.00154
0.60761	0.44539		0.075	0.00154
0.57866	0.46461		0.07536	0.00154
0.56957	3.92686		0.07635	0.00154
0.59242	4.05705		0.07734	0.00154
0.61388	1.52237		0.07833	0.00154
0.60371	0.6109		0.07932	0.00154
0.60471	0.62242		0.08032	0.00154
0.60435	0.3753		0.08131	0.00154
0.59572	0.99145		0.0823	0.00154
0.59598	0.64694		0.08329	0.00154
0.58329	0.57947		0.08428	0.00154
0.61325	0.34963		0.085	0.00154
0.58652	0.81472		0.08527	0.00154
0.58428	1.35573		0.08626	0.00154
0.61833	0.52282		0.08725	0.00154
0.58955	0.57227		0.08824	0.00154
0.61412	0.25726		0.08923	0.00154
0.58616	1.82744		0.09023	0.00154
0.59825	1.09504		0.09122	0.00154
0.60889	0.84003		0.09221	0.00154
0.58702	1.15599		0.0932	0.00154
0.61139	0.33296		0.09419	0.00154
0.60979	0.99474		0.095	0.00154
0.60573	0.83471		0.09518	0.00154
0.60168	0.51426		0.09617	0.00154
0.61126	0.35482		0.09716	0.00154
0.60595	0.52601		0.09815	0.00154
0.58994	2.85569		0.09914	0.00154
0.60328	1.85547		0.10014	0.00154
0.52205	21.2612		0.10113	0.00154
0.60214	1.03174		0.10212	0.00154
0.60192	0.89426		0.10311	0.00154
0.59231	1.92765		0.1041	0.00154
0.6162	0.83124		0.105	0.00154
0.58949	1.34466		0.10509	0.00154
0.59852	0.77928		0.10608	0.00154
0.61228	0.786		0.10707	0.00154
0.6119	0.39775		0.10806	0.00154
0.60726	0.97712		0.10905	0.00154
0.61962	0.55559		0.11005	0.00154
0.6051	0.35473		0.11104	0.00154
0.61413	0.21991		0.11203	0.00154
0.61088	0.41607		0.11302	0.00154
0.59146	1.06148		0.11401	0.00154
0.60209	0.23226		0.115	0.00154
0.60274	0.55974		0.115	0.00154
0.60423	2.03549		0.11599	0.00154
0.60982	0.99737		0.11698	0.00154
0.59979	0.99763		0.11797	0.00154
0.60028	0.82965		0.11896	0.00154
0.60175	2.03164		0.11995	0.00154
0.6195	1.57409		0.12095	0.00154
0.58094	0.22497		0.12194	0.00154
0.61714	0.33291		0.12293	0.00154
0.60643	0.90142		0.12392	0.00154
0.5972	1.70261		0.12491	0.00154
0.6082	0.97506		0.125	0.00154
0.60697	0.60689		0.1259	0.00154
0.58916	1.07474		0.12689	0.00154
0.60285	0.5788		0.12788	0.00154
0.59379	0.82975		0.12887	0.00154
0.59213	1.36469		0.12986	0.00154
0.59817	0.61643		0.13086	0.00154
0.59643	0.87566		0.13185	0.00154
0.60867	2.43987		0.13284	0.00154
0.61705	0.28267		0.13383	0.00154
0.59561	2.38242		0.13482	0.00154
0.60601	0.80175		0.135	0.00154
0.60915	0.20563		0.13581	0.00154
0.60472	1.62728		0.1368	0.00154
0.59058	1.05576		0.13779	0.00154
0.59137	1.24515		0.13878	0.00154
0.60039	0.74237		0.13977	0.00154
0.57639	0.97861		0.14077	0.00154
0.5928	4.98279		0.14176	0.00154
0.60356	1.4034		0.14275	0.00154
0.59551	0.48404		0.14374	0.00154
0.617	0.40813		0.14473	0.00154
0.59961	2.03715		0.145	0.00154
0.58214	0.73099		0.14572	0.00154
0.5986	1.02372		0.14671	0.00154
0.58286	1.13072		0.1477	0.00154
0.607	0.30539		0.14869	0.00154
0.60198	0.32322		0.14968	0.00154
0.60377	1.00475		0.15068	0.00154
0.59133	2.15113		0.15167	0.00154
0.59845	0.80283		0.15266	0.00154
0.59886	1.18361		0.15365	0.00154
0.60221	0.50677		0.15464	0.00154
0.49847	1.43446		0.155	0.00154
0.59512	5.13666		0.15563	0.00154
0.60221	1.16732		0.15662	0.00154
0.59313	0.52673		0.15761	0.00154
0.60081	1.03097		0.1586	0.00154
0.58733	0.62343		0.15959	0.00154
0.61721	0.2995		0.16059	0.00154
0.58373	0.84349		0.16158	0.00154
0.601	0.88005		0.16257	0.00154
0.58789	0.74381		0.16356	0.00154
0.59342	1.92024		0.16455	0.00154
0.51707	0.23463		0.165	0.00154
0.60076	0.39796		0.16554	0.00154
0.60143	0.87837		0.16653	0.00154
0.57785	8.18159		0.16752	0.00154
0.60952	0.34912		0.16851	0.00154
0.54672	0.76018		0.1695	0.00154
0.59607	0.53402		0.1705	0.00154
0.60466	1.33622		0.17149	0.00154
0.59615	1.7618		0.17248	0.00154
0.59417	0.52589		0.17347	0.00154
0.58824	1.11129		0.17446	0.00154
0.58024	1.1823		0.175	0.00154
0.59938	0.91229		0.17545	0.00154
0.59821	0.30354		0.17644	0.00154
0.60989	0.26666		0.17743	0.00154
0.60519	10.888		0.17842	0.00154
0.59765	0.69934		0.17941	0.00154
0.61659	0.38803		0.18041	0.00154
0.59463	1.99425		0.1814	0.00154
0.60207	0.23569		0.18239	0.00154
0.58475	0.48782		0.18338	0.00154
0.60847	1.02646		0.18437	0.00154
0.60562	0.25974		0.185	0.00154
0.6021	1.3143		0.18536	0.00154
0.60694	0.37522		0.18635	0.00154
0.59519	0.62703		0.18734	0.00154
0.59534	1.46295		0.18833	0.00154
0.60198	0.42178		0.18932	0.00154
0.58488	1.47857		0.19032	0.00154
0.59612	0.33484		0.19131	0.00154
0.5895	4.19555		0.1923	0.00154
0.61587	0.41115		0.19329	0.00154
0.14763	1.71854		0.19428	0.00154
0.60104	0.70921		0.195	0.00154
0.59228	0.51029		0.19527	0.00154
0.6017	1.93293		0.19626	0.00154
0.61237	0.63992		0.19725	0.00154
0.60443	0.48635		0.19824	0.00154
0.59797	1.3302		0.19923	0.00154
0.60796	0.41833		0.20023	0.00154
0.61558	0.39835		0.20122	0.00154
0.56831	28.5779		0.20221	0.00154
0.59916	0.66287		0.2032	0.00154
0.60985	0.32169		0.20419	0.00154
0.59907	1.03895		0.205	0.00154
0.59861	1.01118		0.20518	0.00154
0.60733	0.28264		0.20617	0.00154
0.60525	0.83428		0.20716	0.00154
0.50629	1.20321		0.20815	0.00154
0.59331	0.67198		0.20914	0.00154
0.58862	0.6748		0.21014	0.00154
0.60502	0.65594		0.21113	0.00154
0.60152	1.25475		0.21212	0.00154
0.61957	0.63881		0.21311	0.00154
0.61168	0.40127		0.2141	0.00154
0.58683	1.2084		0.215	0.00154
0.61778	0.25954		0.21509	0.00154
0.59908	1.77597		0.21608	0.00154
0.59098	0.60775		0.21707	0.00154
0.61318	0.33759		0.21806	0.00154
0.59865	1.67544		0.21905	0.00154
0.59574	1.10746		0.22005	0.00154
0.60343	0.28997		0.22104	0.00154
0.61122	0.37127		0.22203	0.00154
0.60825	0.42758		0.22302	0.00154
0.61644	0.67114		0.22401	0.00154
0.14678	6.00311		0.225	0.00154
0.60143	0.81811		0.225	0.00154
0.60045	0.58695		0.22599	0.00154
0.61715	0.21969		0.22698	0.00154
0.6008	0.45657		0.22797	0.00154
0.59272	0.63192		0.22896	0.00154
0.60175	0.20919		0.22995	0.00154
0.60163	1.79546		0.23095	0.00154
0.5958	0.79981		0.23194	0.00154
0.60407	0.37894		0.23293	0.00154
0.59884	1.35372		0.23392	0.00154
0.60267	0.81006		0.23491	0.00154
0.58061	1.06362		0.235	0.00154
0.6072	0.22626		0.2359	0.00154
0.58206	4.53835		0.23689	0.00154
0.60878	0.68048		0.23788	0.00154
0.58243	0.3935		0.23887	0.00154
0.59446	0.51988		0.23986	0.00154
0.59634	0.6633		0.24086	0.00154
0.58361	0.47251		0.24185	0.00154
0.59039	0.29531		0.24284	0.00154
0.59952	1.29675		0.24383	0.00154
0.61826	0.43171		0.24482	0.00154
0.59924	1.75689		0.245	0.00154
0.58356	1.15721		0.24581	0.00154
0.59022	0.79137		0.2468	0.00154
0.60632	0.59568		0.24779	0.00154
0.59274	0.2294		0.24878	0.00154
0.60374	0.2506		0.24977	0.00154
0.59763	0.46186		0.25077	0.00154
0.58938	0.72997		0.25176	0.00154
0.61508	0.29049		0.25275	0.00154
0.61389	1.02267		0.25374	0.00154
0.59654	0.21092		0.25473	0.00154
0.58976	1.39352		0.255	0.00154
0.59961	9.82357		0.25572	0.00154
0.59694	0.61509		0.25671	0.00154
0.58534	1.92855		0.2577	0.00154
0.5763	0.2556		0.25869	0.00154
0.60531	28.4635		0.25968	0.00154
0.60171	0.74628		0.26068	0.00154
0.59967	0.5019		0.26167	0.00154
0.6058	0.77958		0.26266	0.00154
0.59353	0.57554		0.26365	0.00154
0.59541	0.41818		0.26464	0.00154
0.59576	0.73493		0.265	0.00154
0.59679	0.45053		0.26563	0.00154
0.59166	1.76229		0.26662	0.00154
0.58875	0.33517		0.26761	0.00154
0.58623	2.04583		0.2686	0.00154
0.59588	1.1877		0.26959	0.00154
0.59723	0.81138		0.27059	0.00154
0.60869	0.84954		0.27158	0.00154
0.58286	0.73187		0.27257	0.00154
0.59736	2.36754		0.27356	0.00154
0.58865	2.52139		0.27455	0.00154
0.61352	0.46885		0.275	0.00154
0.60914	0.85617		0.27554	0.00154
0.59904	0.97557		0.27653	0.00154
0.60576	0.52891		0.27752	0.00154
0.60781	0.48267		0.27851	0.00154
0.60836	0.30311		0.2795	0.00154
0.59787	0.69115		0.2805	0.00154
0.59433	1.36689		0.28149	0.00154
0.60833	1.02788		0.28248	0.00154
0.58505	1.5502		0.28347	0.00154
0.59214	1.22239		0.28446	0.00154
0.6072	1.05856		0.285	0.00154
0.59251	1.55064		0.28545	0.00154
0.61075	0.68681		0.28644	0.00154
0.57775	0.43564		0.28743	0.00154
0.58963	1.06208		0.28842	0.00154
0.57725	0.4991		0.28941	0.00154
0.59748	0.45526		0.29041	0.00154
0.60648	0.85896		0.2914	0.00154
0.58421	22.3111		0.29239	0.00154
0.57605	5.47987		0.29338	0.00154
0.58837	2.28808		0.29437	0.00154
0.59232	0.99774		0.295	0.00154
0.59089	2.87844		0.29536	0.00154
0.60837	0.29007		0.29635	0.00154
0.59522	0.4598		0.29734	0.00154
0.59204	1.05326		0.29833	0.00154
0.58257	0.23039		0.29932	0.00154
0.56302	0.36154		0.30032	0.00154
0.58817	0.20751		0.30131	0.00154
0.59515	0.24825		0.3023	0.00154
0.58682	3.3336		0.30329	0.00154
0.58988	0.30288		0.30428	0.00154
0.60002	0.5828		0.305	0.00154
0.59923	0.25829		0.30527	0.00154
0.60618	0.67434		0.30626	0.00154
0.61891	0.28329		0.30725	0.00154
0.61228	0.21406		0.30824	0.00154
0.58469	1.41938		0.30923	0.00154
0.60562	0.65104		0.31023	0.00154
0.61527	0.38816		0.31122	0.00154
0.59766	0.9872		0.31221	0.00154
0.59105	0.58499		0.3132	0.00154
0.35077	0.72122		0.31419	0.00154
0.59717	0.77763		0.315	0.00154
0.55491	6.39447		0.31518	0.00154
0.57599	0.63487		0.31617	0.00154
0.5893	1.9215		0.31716	0.00154
0.6068	0.76201		0.31815	0.00154
0.61153	2.02499		0.31914	0.00154
0.59139	0.32679		0.32014	0.00154
0.58103	0.56697		0.32113	0.00154
0.59422	0.29495		0.32212	0.00154
0.46771	0.67001		0.32311	0.00154
0.57623	0.41075		0.3241	0.00154
0.60427	0.79198		0.325	0.00154
0.6011	0.53449		0.32509	0.00154
0.61598	0.30289		0.32608	0.00154
0.5842	1.17733		0.32707	0.00154
0.60056	0.6503		0.32806	0.00154
0.60422	1.38168		0.32905	0.00154
0.58707	0.91433		0.33005	0.00154
0.58888	0.70812		0.33104	0.00154
0.61836	1.78479		0.33203	0.00154
0.58985	0.85565		0.33302	0.00154
0.59456	1.23686		0.33401	0.00154
0.58157	0.89302		0.335	0.00154
0.60761	0.91515		0.33599	0.00154
0.5927	0.53784		0.33698	0.00154
0.60947	0.71668		0.33797	0.00154
0.59851	2.57374		0.33896	0.00154
0.60184	2.67347		0.33995	0.00154
0.60802	1.34275		0.34095	0.00154
0.6112	1.00717		0.34194	0.00154
0.59135	0.36307		0.34293	0.00154
0.59658	2.56101		0.34392	0.00154
0.60776	0.30692		0.34491	0.00154
0.60034	0.5424		0.345	0.00154
0.59786	0.32786		0.3459	0.00154
0.60989	0.22823		0.34689	0.00154
0.61098	0.27979		0.34788	0.00154
0.60799	0.35349		0.34887	0.00154
0.5908	0.43441		0.34986	0.00154
0.59429	2.89745		0.35086	0.00154
0.57917	1.84346		0.35185	0.00154
0.59176	0.35369		0.35284	0.00154
0.54882	0.2647		0.35383	0.00154
0.57986	0.50563		0.35482	0.00154
0.59214	1.10711		0.355	0.00154
0.59664	1.51911		0.35581	0.00154
0.60519	0.27087		0.3568	0.00154
0.59712	1.30954		0.35779	0.00154
0.59868	1.26806		0.35878	0.00154
0.59312	3.45087		0.35977	0.00154
0.59399	0.51137		0.36077	0.00154
0.6018	1.35471		0.36176	0.00154
0.61564	0.31303		0.36275	0.00154
0.60849	0.71469		0.36374	0.00154
0.61338	0.96281		0.36473	0.00154
0.59202	1.11591		0.365	0.00154
0.61963	0.24502		0.36572	0.00154
0.59695	3.77755		0.36671	0.00154
0.59032	0.91581		0.3677	0.00154
0.59926	0.84793		0.36869	0.00154
0.57107	0.41033		0.36968	0.00154
0.59555	0.84326		0.37068	0.00154
0.57843	0.32866		0.37167	0.00154
0.59688	0.9994		0.37266	0.00154
0.59557	1.87722		0.37365	0.00154
0.58239	0.37095		0.37464	0.00154
0.61197	0.4668		0.375	0.00154
0.53498	0.28565		0.37563	0.00154
0.60814	1.92765		0.37662	0.00154
0.57807	0.29514		0.37761	0.00154
0.5999	0.88421		0.3786	0.00154
0.60822	0.35607		0.37959	0.00154
0.59417	0.55145		0.38059	0.00154
0.61188	0.69853		0.38158	0.00154
0.58203	0.41309		0.38257	0.00154
0.60568	0.55809		0.38356	0.00154
0.52247	0.59405		0.38455	0.00154
0.55417	15.861		0.385	0.00154
0.61918	0.4425		0.38554	0.00154
0.58281	0.32289		0.38653	0.00154
0.59549	0.88456		0.38752	0.00154
0.60967	0.4723		0.38851	0.00154
0.59416	1.59553		0.3895	0.00154
0.60183	0.25847		0.3905	0.00154
0.60226	0.71846		0.39149	0.00154
0.60351	0.74115		0.39248	0.00154
0.59948	2.56048		0.39347	0.00154
0.59069	0.27917		0.39446	0.00154
0.58395	0.47461		0.395	0.00154
0.58356	1.64789		0.39545	0.00154
0.61183	1.12493		0.39644	0.00154
0.59245	0.47581		0.39743	0.00154
0.57735	0.64232		0.39842	0.00154
0.5873	0.3698		0.39941	0.00154
0.59768	0.38687		0.40041	0.00154
0.61116	0.36204		0.4014	0.00154
0.58841	0.4078		0.40239	0.00154
0.54219	9.37183		0.40338	0.00154
0.59506	0.52612		0.40437	0.00154
0.58305	0.4291		0.405	0.00154
0.59309	2.34946		0.40536	0.00154
0.60331	0.43152		0.40635	0.00154
0.61006	0.64678		0.40734	0.00154
0.58907	0.48353		0.40833	0.00154
0.61258	1.84638		0.40932	0.00154
0.59692	1.32355		0.41032	0.00154
0.60959	0.43116		0.41131	0.00154
0.60485	0.4747		0.4123	0.00154
0.58701	2.09175		0.41329	0.00154
0.59156	0.51991		0.41428	0.00154
0.59282	1.08304		0.415	0.00154
0.59251	2.19724		0.41527	0.00154
0.57359	0.9173		0.41626	0.00154
0.59623	0.34938		0.41725	0.00154
0.54755	2.89582		0.41824	0.00154
0.59251	1.09345		0.41923	0.00154
0.60155	1.02069		0.42023	0.00154
0.61598	0.31824		0.42122	0.00154
0.59953	1.73191		0.42221	0.00154
0.61693	0.50568		0.4232	0.00154
0.59024	0.6408		0.42419	0.00154
0.59529	0.53364		0.425	0.00154
0.61231	0.51179		0.42518	0.00154
0.61216	0.388		0.42617	0.00154
0.58447	1.93179		0.42716	0.00154
0.60345	0.86357		0.42815	0.00154
0.57028	0.7833		0.42914	0.00154
0.5824	0.91451		0.43014	0.00154
0.59835	2.24581		0.43113	0.00154
0.60725	0.57373		0.43212	0.00154
0.60195	0.72019		0.43311	0.00154
0.58953	0.57308		0.4341	0.00154
0.61733	0.26264		0.435	0.00154
0.57861	0.97425		0.43509	0.00154
0.60174	0.66666		0.43608	0.00154
0.59472	0.5218		0.43707	0.00154
0.58416	0.56377		0.43806	0.00154
0.59383	0.3197		0.43905	0.00154
0.61438	1.9076		0.44005	0.00154
0.4555	0.52043		0.44104	0.00154
0.59575	0.96487		0.44203	0.00154
0.5964	4.28284		0.44302	0.00154
0.58471	1.01382		0.44401	0.00154
0.60226	1.79038		0.445	0.00154
0.57786	10.0851		0.445	0.00154
0.60336	1.4391		0.44599	0.00154
0.61737	0.27646		0.44698	0.00154
0.60899	1.35776		0.44797	0.00154
0.59372	0.70819		0.44896	0.00154
0.60435	2.04333		0.44995	0.00154
0.5964	0.36548		0.45095	0.00154
0.59292	0.50378		0.45194	0.00154
0.59352	0.83845		0.45293	0.00154
0.42876	0.28173		0.45392	0.00154
0.61888	0.20269		0.45491	0.00154
0.15934	0.21799		0.455	0.00154
0.49548	0.45201		0.4559	0.00154
0.42318	0.22737		0.45689	0.00154
0.398	0.61425		0.45788	0.00154
0.28626	0.24293		0.45887	0.00154
0.40044	23.8056		0.45986	0.00154
0.4074	0.25571		0.46086	0.00154
0.60187	6.39558		0.46185	0.00154
0.59671	0.93719		0.46284	0.00154
0.55175	6.13674		0.46383	0.00154
0.61434	1.50045		0.46482	0.00154
0.43501	1.05907		0.465	0.00154
0.58923	5.52439		0.46581	0.00154
0.61573	0.30053		0.4668	0.00154
0.58003	0.2787		0.46779	0.00154
0.61242	0.46509		0.46878	0.00154
0.61738	0.24032		0.46977	0.00154
0.47993	0.27162		0.47077	0.00154
0.59089	0.25711		0.47176	0.00154
0.58941	0.54424		0.47275	0.00154
0.58829	1.55251		0.47374	0.00154
0.59623	1.06584		0.47473	0.00154
0.61067	1.25025		0.475	0.00154
0.60868	0.26308		0.47572	0.00154
0.59948	0.74149		0.47671	0.00154
0.58362	1.88701		0.4777	0.00154
0.60771	0.36759		0.47869	0.00154
0.59905	0.24329		0.47968	0.00154
0.58558	3.72073		0.48068	0.00154
0.59142	0.52811		0.48167	0.00154
0.59452	0.95842		0.48266	0.00154
0.5817	0.97716		0.48365	0.00154
0.59057	1.93913		0.48464	0.00154
0.60773	1.35182		0.485	0.00154
0.60372	1.57304		0.48563	0.00154
0.60108	0.77709		0.48662	0.00154
0.59622	0.47739		0.48761	0.00154
0.60206	0.56246		0.4886	0.00154
0.5732	2.25874		0.48959	0.00154
0.5929	5.30682		0.49059	0.00154
0.50804	0.5388		0.49158	0.00154
0.60133	1.2996		0.49257	0.00154
0.6024	1.06353		0.49356	0.00154
0.6136	0.40729		0.49455	0.00154
0.59872	0.82387		0.495	0.00154
0.60266	0.4145		0.49554	0.00154
0.55307	0.83638		0.49653	0.00154
0.5911	0.99478		0.49752	0.00154
0.59784	0.4944		0.49851	0.00154
0.61088	0.40272		0.4995	0.00154
0.60433	0.55946		0.5005	0.00154
0.5827	1.45192		0.50149	0.00154
0.57618	1.66959		0.50248	0.00154
0.6015	0.39416		0.50347	0.00154
0.58702	0.75611		0.50446	0.00154
0.59442	2.52775		0.505	0.00154
0.58781	1.82616		0.50545	0.00154
0.58077	3.08425		0.50644	0.00154
0.59777	0.64353		0.50743	0.00154
0.6086	0.52305		0.50842	0.00154
0.60353	1.71079		0.50941	0.00154
0.59856	0.23538		0.51041	0.00154
0.52877	0.56004		0.5114	0.00154
0.60399	2.76865		0.51239	0.00154
0.58921	1.09306		0.51338	0.00154
0.23977	3.63659		0.51437	0.00154
0.61301	0.60113		0.515	0.00154
0.61516	0.4187		0.51536	0.00154
0.59379	2.22169		0.51635	0.00154
0.60909	0.58976		0.51734	0.00154
0.59744	1.62741		0.51833	0.00154
0.58688	1.05892		0.51932	0.00154
0.60714	1.32083		0.52032	0.00154
0.61624	0.20122		0.52131	0.00154
0.59307	0.69905		0.5223	0.00154
0.58309	0.35769		0.52329	0.00154
0.59065	0.26791		0.52428	0.00154
0.61717	0.35803		0.525	0.00154
0.56087	0.91069		0.52527	0.00154
0.59871	2.00387		0.52626	0.00154
0.61467	0.39128		0.52725	0.00154
0.58221	0.77379		0.52824	0.00154
0.61922	0.29037		0.52923	0.00154
0.6118	0.2539		0.53023	0.00154
0.60894	0.52665		0.53122	0.00154
0.60511	1.15308		0.53221	0.00154
0.59854	1.14321		0.5332	0.00154
0.61279	0.27052		0.53419	0.00154
0.59334	1.24203		0.535	0.00154
0.50406	1.28342		0.53518	0.00154
0.58541	1.77347		0.53617	0.00154
0.60681	1.16003		0.53716	0.00154
0.60934	0.57439		0.53815	0.00154
0.59862	1.6833		0.53914	0.00154
0.58699	0.77465		0.54014	0.00154
0.58321	1.21102		0.54113	0.00154
0.55012	0.52716		0.54212	0.00154
0.60741	0.31061		0.54311	0.00155
0.56607	8.01614		0.5441	0.00155
0.60538	2.73886		0.545	0.00156
0.59553	0.96819		0.54509	0.00156
0.57925	2.39549		0.54608	0.00156
0.60108	0.53376		0.54707	0.00157
0.59991	1.07923		0.54806	0.00159
0.61378	0.33988		0.54905	0.00161
0.13891	0.83826		0.55005	0.00164
0.5982	0.50105		0.55104	0.00167
0.59453	0.68856		0.55203	0.00172
0.59183	0.91951		0.55302	0.00178
0.61366	0.25534		0.55401	0.00186
0.60761	0.73584		0.555	0.00197
0.60974	0.61436		0.55599	0.00211
0.53494	0.21824		0.55698	0.00229
0.58807	0.58285		0.55797	0.00252
0.58519	1.1755		0.55896	0.00282
0.48058	0.61126		0.55995	0.00319
0.59241	1.04859		0.56095	0.00365
0.55001	1.38527		0.56194	0.00423
0.59563	2.62839		0.56293	0.00494
0.60503	0.55172		0.56392	0.00582
0.59262	0.8705		0.56491	0.00689
0.59729	0.33394		0.565	0.007
0.57914	2.89824		0.5659	0.00819
0.61759	0.50236		0.56689	0.00975
0.61234	0.22196		0.56788	0.01161
0.59782	3.04067		0.56887	0.01382
0.53729	3.98623		0.56986	0.01642
0.60419	1.50166		0.57086	0.01947
0.60805	0.52388		0.57185	0.023
0.60455	0.66084		0.57284	0.02706
0.61596	0.37028		0.57383	0.03171
0.59357	0.676		0.57482	0.03699
0.59096	0.5727		0.575	0.03802
0.61885	0.70486		0.57581	0.04294
0.61393	0.59207		0.5768	0.04958
0.60052	0.35364		0.57779	0.05695
0.60333	1.08025		0.57878	0.06505
0.59374	1.95266		0.57977	0.07389
0.58571	1.51539		0.58077	0.08345
0.59275	1.34773		0.58176	0.0937
0.57235	2.04267		0.58275	0.1046
0.54601	0.22726		0.58374	0.11608
0.61062	0.21123		0.58473	0.12805
0.59612	0.50208		0.585	0.13138
0.61132	0.38845		0.58572	0.1404
0.59329	0.28703		0.58671	0.15303
0.59702	1.31333		0.5877	0.16579
0.59725	0.83435		0.58869	0.17852
0.59653	0.92		0.58968	0.19106
0.61634	0.47755		0.59068	0.20325
0.6075	0.50933		0.59167	0.21489
0.58455	0.30093		0.59266	0.22582
0.61539	0.36694		0.59365	0.23585
0.57991	2.53725		0.59464	0.24482
0.61115	0.31402		0.595	0.24779
0.57369	1.00299		0.59563	0.25258
0.60108	20.6755		0.59662	0.25899
0.58608	1.66675		0.59761	0.26394
0.61872	0.32317		0.5986	0.26733
0.59251	0.40629		0.59959	0.26911
0.60668	0.87797		0.60059	0.26924
0.59091	2.71441		0.60158	0.26772
0.59859	0.8197		0.60257	0.26458
0.60695	0.57087		0.60356	0.25988
0.5789	0.36139		0.60455	0.25369
0.60356	1.25867		0.605	0.25042
0.60367	0.55563		0.60554	0.24614
0.60681	0.45431		0.60653	0.23735
0.56415	0.93444		0.60752	0.22747
0.59783	1.18996		0.60851	0.21668
0.58276	0.68237		0.6095	0.20514
0.6062	0.41479		0.6105	0.19303
0.59999	0.57575		0.61149	0.18053
0.60086	0.50261		0.61248	0.16781
0.60901	1.30822		0.61347	0.15505
0.56879	2.61071		0.61446	0.14239
0.61508	0.27881		0.615	0.13559
0.52942	0.3948		0.61545	0.12998
0.59669	0.42585		0.61644	0.11795
0.59633	0.9151		0.61743	0.10639
0.60507	0.9429		0.61842	0.09539
0.61278	0.87464		0.61941	0.08503
0.59649	0.83968		0.62041	0.07536
0.60191	0.91072		0.6214	0.06641
0.44749	0.49597		0.62239	0.05819
0.61386	0.26498		0.62338	0.0507
0.59464	1.31782		0.62437	0.04395
0.60224	0.34701		0.625	0.04001
0.61365	1.73534		0.62536	0.03789
0.61384	1.30759		0.62635	0.03251
0.59029	3.40285		0.62734	0.02776
0.58804	8.74891		0.62833	0.0236
0.60649	0.82142		0.62932	0.01999
0.61729	0.33128		0.63032	0.01688
0.60172	0.88743		0.63131	0.01421
0.59786	2.14069		0.6323	0.01194
0.59737	1.28296		0.63329	0.01002
0.6012	1.80179		0.63428	0.00842
0.61807	0.25958		0.635	0.00742
0.59734	2.77536		0.63527	0.00708
0.59895	0.31577		0.63626	0.00598
0.56931	0.3609		0.63725	0.00507
0.57964	0.72963		0.63824	0.00433
0.58609	0.70756		0.63923	0.00374
0.61144	0.35378		0.64023	0.00325
0.60565	1.91925		0.64122	0.00287
0.59517	0.61132		0.64221	0.00257
0.61724	1.43399		0.6432	0.00233
0.6132	0.33993		0.64419	0.00214
0.59728	0.24694		0.645	0.00202
0.59434	0.26904		0.64518	0.00199
0.61303	0.95046		0.64617	0.00188
0.608	7.64764		0.64716	0.00179
0.59383	1.23927		0.64815	0.00173
0.61064	0.43295		0.64914	0.00168
0.60552	0.29847		0.65014	0.00164
0.59785	0.83896		0.65113	0.00161
0.59963	0.53054		0.65212	0.00159
0.59236	0.95838		0.65311	0.00158
0.29706	0.63914		0.6541	0.00157
0.5857	0.31511		0.655	0.00156
0.59324	2.04161		0.65509	0.00156
0.61261	0.39068		0.65608	0.00155
0.59664	1.81769		0.65707	0.00155
0.55595	3.13284		0.65806	0.00154
0.57262	1.18065		0.65905	0.00154
0.58972	0.64709		0.66005	0.00154
0.60276	0.32398		0.66104	0.00154
0.59674	0.93209		0.66203	0.00154
0.60741	0.49137		0.66302	0.00154
0.59219	2.91969		0.66401	0.00154
0.59286	0.84812		0.665	0.00154
0.60237	0.33529		0.66599	0.00154
0.61491	0.43774		0.66698	0.00154
0.60441	0.76022		0.66797	0.00154
0.61178	1.25064		0.66896	0.00154
0.53989	3.18604		0.66995	0.00154
0.61337	0.67864		0.67095	0.00154
0.59792	2.19142		0.67194	0.00154
0.60301	1.0714		0.67293	0.00154
0.569	10.9203		0.67392	0.00154
0.5927	1.19483		0.67491	0.00154
0.58992	1.13513		0.675	0.00154
0.6049	0.50389		0.6759	0.00154
0.59243	3.24447		0.67689	0.00154
0.36356	0.22309		0.67788	0.00154
0.59843	0.64523		0.67887	0.00154
0.59198	0.85466		0.67986	0.00154
0.57104	1.87409		0.68086	0.00154
0.57806	0.6676		0.68185	0.00154
0.59412	0.33524		0.68284	0.00154
0.58506	0.7872		0.68383	0.00154
0.60812	0.63576		0.68482	0.00154
0.6029	0.65965		0.685	0.00154
0.59418	1.23065		0.68581	0.00154
0.60586	0.86687		0.6868	0.00154
0.61188	0.348		0.68779	0.00154
0.60377	1.49917		0.68878	0.00154
0.59773	0.60979		0.68977	0.00154
0.60621	0.44515		0.69077	0.00154
0.59333	1.17965		0.69176	0.00154
0.587	0.46408		0.69275	0.00154
0.57233	0.3015		0.69374	0.00154
0.59403	1.44303		0.69473	0.00154
0.60044	1.02836		0.695	0.00154
0.59625	0.50635		0.69572	0.00154
0.5891	2.0562		0.69671	0.00154
0.11379	4.35116		0.6977	0.00154
0.60087	1.54709		0.69869	0.00154
0.60179	2.48533		0.69968	0.00154
0.6095	1.84791		0.70068	0.00154
0.59668	0.20644		0.70167	0.00154
0.60897	0.21425		0.70266	0.00154
0.61656	0.42646		0.70365	0.00154
0.58885	0.49514		0.70464	0.00154
0.59321	0.78662		0.705	0.00154
0.56799	0.41123		0.70563	0.00154
0.42446	0.75069		0.70662	0.00154
0.58653	0.64989		0.70761	0.00154
0.59838	0.44467		0.7086	0.00154
0.59609	2.47147		0.70959	0.00154
0.59097	1.03865		0.71059	0.00154
0.1313	0.50345		0.71158	0.00154
0.59936	1.70962		0.71257	0.00154
0.58914	0.91843		0.71356	0.00154
0.43434	0.66908		0.71455	0.00154
0.599	0.21075		0.715	0.00154
0.61507	0.52053		0.71554	0.00154
0.60994	0.38488		0.71653	0.00154
0.59487	1.0547		0.71752	0.00154
0.5899	1.20871		0.71851	0.00154
0.60485	0.22493		0.7195	0.00154
0.60098	0.24212		0.7205	0.00154
0.59495	0.50697		0.72149	0.00154
0.58633	1.05543		0.72248	0.00154
0.59707	0.47035		0.72347	0.00154
0.59871	1.0688		0.72446	0.00154
0.59338	0.71433		0.725	0.00154
0.58553	1.47485		0.72545	0.00154
0.59781	0.26679		0.72644	0.00154
0.59642	1.99842		0.72743	0.00154
0.61331	0.56132		0.72842	0.00154
0.59931	5.09441		0.72941	0.00154
0.605	2.21461		0.73041	0.00154
0.60609	0.53126		0.7314	0.00154
0.60943	0.29622		0.73239	0.00154
0.61632	0.26654		0.73338	0.00154
0.60307	25.4479		0.73437	0.00154
0.61672	0.26284		0.735	0.00154
0.56776	0.23898		0.73536	0.00154
0.61343	0.32589		0.73635	0.00154
0.5948	2.131		0.73734	0.00154
0.59816	3.67159		0.73833	0.00154
0.59616	0.95091		0.73932	0.00154
0.5995	0.7982		0.74032	0.00154
0.51431	1.0391		0.74131	0.00154
0.59108	2.20228		0.7423	0.00154
0.59863	0.41555		0.74329	0.00154
0.59036	1.33355		0.74428	0.00154
0.57955	0.38342		0.745	0.00154
0.58571	3.60108		0.74527	0.00154
0.60437	1.67415		0.74626	0.00154
0.59029	0.98723		0.74725	0.00154
0.60469	0.70576		0.74824	0.00154
0.60493	0.3524		0.74923	0.00154
0.59588	1.10939		0.75023	0.00154
0.60941	0.78921		0.75122	0.00154
0.57235	0.61209		0.75221	0.00154
0.59284	2.17383		0.7532	0.00154
0.60097	0.90628		0.75419	0.00154
0.61206	0.90482		0.755	0.00154
0.58318	1.15466		0.75518	0.00154
0.61511	0.65212		0.75617	0.00154
0.58415	0.3592		0.75716	0.00154
0.59242	1.17225		0.75815	0.00154
0.60791	0.27157		0.75914	0.00154
0.6038	0.46136		0.76014	0.00154
0.6143	0.24235		0.76113	0.00154
0.61495	0.23693		0.76212	0.00154
0.59478	0.57046		0.76311	0.00154
0.61721	0.27743		0.7641	0.00154
0.61709	0.24637		0.765	0.00154
0.59697	2.5193		0.76509	0.00154
0.6192	1.04426		0.76608	0.00154
0.61524	0.44776		0.76707	0.00154
0.60426	2.67742		0.76806	0.00154
0.61685	0.3242		0.76905	0.00154
0.59116	0.26018		0.77005	0.00154
0.60736	1.45016		0.77104	0.00154
0.5898	1.15646		0.77203	0.00154
0.58973	1.08978		0.77302	0.00154
0.58876	0.45783		0.77401	0.00154
0.5877	0.33633		0.775	0.00154
0.58684	1.56664		0.77599	0.00154
0.58137	2.09874		0.77698	0.00154
0.60495	0.51324		0.77797	0.00154
0.59883	0.66351		0.77896	0.00154
0.58516	1.49857		0.77995	0.00154
0.60098	1.05621		0.78095	0.00154
0.59573	0.66056		0.78194	0.00154
0.59945	0.86797		0.78293	0.00154
0.60994	1.105		0.78392	0.00154
0.6028	1.52205		0.78491	0.00154
0.59648	0.89722		0.785	0.00154
0.61493	0.31014		0.7859	0.00154
0.58674	0.59099		0.78689	0.00154
0.60596	0.35154		0.78788	0.00154
0.61205	0.3619		0.78887	0.00154
0.59764	1.15572		0.78986	0.00154
0.60624	0.23493		0.79086	0.00154
0.59137	6.83489		0.79185	0.00154
0.61267	0.24756		0.79284	0.00154
0.59853	0.74614		0.79383	0.00154
0.59341	0.42054		0.79482	0.00154
0.58463	1.08072		0.795	0.00154
0.60461	1.25716		0.79581	0.00154
0.60182	1.35628		0.7968	0.00154
0.59401	0.69142		0.79779	0.00154
0.60122	1.97944		0.79878	0.00154
0.59091	1.0399		0.79977	0.00154
0.58134	1.4629		0.80077	0.00154
0.59942	0.43096		0.80176	0.00154
0.58341	2.08561		0.80275	0.00154
0.59771	0.62132		0.80374	0.00154
0.60082	1.03844		0.80473	0.00154
0.61647	0.87283		0.805	0.00154
0.59777	0.69579		0.80572	0.00154
0.61813	3.08758		0.80671	0.00154
0.59991	1.87485		0.8077	0.00154
0.59954	3.88519		0.80869	0.00154
0.59615	0.36121		0.80968	0.00154
0.61666	0.24968		0.81068	0.00154
0.61862	0.28328		0.81167	0.00154
0.59323	0.80027		0.81266	0.00154
0.60753	2.71262		0.81365	0.00154
0.6076	0.62428		0.81464	0.00154
0.5965	0.31565		0.815	0.00154
0.58408	0.95151		0.81563	0.00154
0.5896	0.95348		0.81662	0.00154
0.60494	0.45628		0.81761	0.00154
0.61051	0.63231		0.8186	0.00154
0.61032	0.51997		0.81959	0.00154
0.59232	0.69271		0.82059	0.00154
0.60774	0.22265		0.82158	0.00154
0.60699	0.50814		0.82257	0.00154
0.60282	0.40133		0.82356	0.00154
0.60815	0.98152		0.82455	0.00154
0.59835	0.45928		0.825	0.00154
0.5691	0.54193		0.82554	0.00154
0.59906	1.20221		0.82653	0.00154
0.59789	0.35955		0.82752	0.00154
0.6134	0.86437		0.82851	0.00154
0.60294	1.07433		0.8295	0.00154
0.59654	1.2021		0.8305	0.00154
0.58383	1.60134		0.83149	0.00154
0.60586	0.89156		0.83248	0.00154
0.58441	1.15083		0.83347	0.00154
0.58089	0.32817		0.83446	0.00154
0.60426	2.43081		0.835	0.00154
0.60978	0.71096		0.83545	0.00154
0.61271	0.59341		0.83644	0.00154
0.60533	0.3462		0.83743	0.00154
0.58553	1.40038		0.83842	0.00154
0.59625	1.60789		0.83941	0.00154
0.61069	0.48691		0.84041	0.00154
0.60088	0.55881		0.8414	0.00154
0.59066	0.4335		0.84239	0.00154
0.58006	0.69584		0.84338	0.00154
0.57179	1.36461		0.84437	0.00154
0.58283	0.47579		0.845	0.00154
0.60029	0.40977		0.84536	0.00154
0.59834	1.03482		0.84635	0.00154
0.4709	0.72026		0.84734	0.00154
0.59928	0.40259		0.84833	0.00154
0.17674	0.80947		0.84932	0.00154
0.60019	0.27491		0.85032	0.00154
0.602	0.75688		0.85131	0.00154
0.60576	1.84473		0.8523	0.00154
0.616	0.30427		0.85329	0.00154
0.58255	0.31087		0.85428	0.00154
0.60856	2.60366		0.855	0.00154
0.59013	0.44399		0.85527	0.00154
0.596	0.62283		0.85626	0.00154
0.61689	0.42653		0.85725	0.00154
0.58574	1.36908		0.85824	0.00154
0.5782	1.7015		0.85923	0.00154
0.59427	0.82715		0.86023	0.00154
0.60575	0.36112		0.86122	0.00154
0.56925	1.33018		0.86221	0.00154
0.60712	1.10752		0.8632	0.00154
0.60468	0.66244		0.86419	0.00154
0.60793	0.55849		0.865	0.00154
0.6081	0.35892		0.86518	0.00154
0.59343	0.3878		0.86617	0.00154
0.61508	1.22587		0.86716	0.00154
0.60155	1.81512		0.86815	0.00154
0.15205	3.08421		0.86914	0.00154
0.60068	0.74294		0.87014	0.00154
0.56638	0.37294		0.87113	0.00154
0.60754	1.00313		0.87212	0.00154
0.6088	0.23061		0.87311	0.00154
0.60781	1.71147		0.8741	0.00154
0.58844	3.2136		0.875	0.00154
0.61512	0.46227		0.87509	0.00154
0.607	0.57361		0.87608	0.00154
0.617	0.22864		0.87707	0.00154
0.59879	0.81095		0.87806	0.00154
0.61966	0.21781		0.87905	0.00154
0.56158	0.50234		0.88005	0.00154
0.59443	1.58063		0.88104	0.00154
0.59043	0.85937		0.88203	0.00154
0.59787	1.33567		0.88302	0.00154
0.60162	1.06651		0.88401	0.00154
0.61959	0.36255		0.885	0.00154
0.61112	0.56429		0.885	0.00154
0.59949	0.50054		0.88599	0.00154
0.61446	0.34695		0.88698	0.00154
0.59006	2.52659		0.88797	0.00154
0.59075	0.58254		0.88896	0.00154
0.57447	1.8966		0.88995	0.00154
0.58115	1.84606		0.89095	0.00154
0.59172	1.72869		0.89194	0.00154
0.61097	0.67631		0.89293	0.00154
0.59251	1.6462		0.89392	0.00154
0.59515	0.38179		0.89491	0.00154
0.59486	2.19587		0.895	0.00154
0.59487	1.96095		0.8959	0.00154
0.61127	0.61999		0.89689	0.00154
0.6093	0.62743		0.89788	0.00154
0.59588	1.19115		0.89887	0.00154
0.6021	0.97158		0.89986	0.00154
0.59379	0.98029		0.90086	0.00154
0.59649	1.11872		0.90185	0.00154
0.61265	0.4177		0.905	0.00154
0.61727	0.42109		0.915	0.00154
0.59654	1.28344		0.925	0.00154
0.59423	1.22308		0.935	0.00154
0.58519	3.79532		0.945	0.00154
0.59752	2.4262		0.955	0.00154
0.60069	2.13524		0.965	0.00154
0.60346	1.08888		0.975	0.00154
0.5836	3.72599		0.985	0.00154
0.60544	0.46472		0.995	0.00154
0.57882	2.73122
0.5246	0.35422
0.59455	1.56513
0.58485	0.96615
0.58701	4.82444
0.61045	1.08158
0.5766	4.98165
0.61929	3.78366
0.60888	0.31858
0.6065	0.63941
0.3982	1.13911
0.59337	0.76081
0.58739	5.39755
0.58491	0.98731
0.60015	1.563
0.59543	1.80535
0.59789	2.16178
0.60021	0.7684
0.60239	0.67009
0.58821	0.9111
0.58737	1.09104
0.59059	0.36225
0.59844	0.63867
0.59031	0.54812
0.60031	0.78073
0.61676	0.36811
0.61152	0.43179
0.49183	1.41621
0.61331	2.47154
0.60929	2.46925
0.61363	2.61984
0.58229	0.86056
0.61245	1.52234
0.61266	2.38653
0.59901	1.12148
0.60276	0.96254
0.58416	1.14278
0.39729	2.91191
0.58598	1.93972
0.53867	7.74485
0.60503	0.3907
0.58635	0.72765
0.59982	0.84745
0.58935	0.5464
0.60941	1.01366
0.58899	1.18463
0.60033	1.00118
0.5996	0.972
0.60484	2.49938
0.6041	1.49657
0.58705	0.97918
0.58142	1.30214
0.61619	0.41611
0.58931	1.37163
0.60608	0.26309
0.59863	1.64777
0.60321	0.29683
0.5949	0.7959
0.60574	0.82093
0.60241	0.24772
0.45232	3.14287
0.60806	1.10741
0.16287	1.49608
0.61144	8.12178
0.59863	1.2608
0.60322	0.43016
0.60601	0.21331
0.58405	0.33842
0.61712	0.35248
0.56905	0.77788
0.60388	1.86655
0.59412	1.31842
0.59966	0.66862
0.38807	0.58726
0.55373	1.4304
0.59256	0.96364
0.55965	0.20467
0.59091	1.4498
0.59775	2.65202
0.49962	0.53593
0.59456	0.7374
0.58664	0.59975
0.60453	0.64742
0.61455	0.73274
0.6124	1.14374
0.58377	2.53849
0.5808	0.42395
0.59451	0.98394
0.60158	0.67827
0.59515	1.61224
0.61752	0.58427
0.60632	9.2195
0.59604	1.04775
0.59757	0.99096
0.58789	0.4026
0.44833	0.84977
0.60998	0.57928
0.61918	1.13959
0.60271	0.58142
0.6097	0.55566
0.61479	0.47074
0.58319	1.61961
0.59684	1.39618
0.58956	1.21133
0.58921	0.56925
0.6116	0.63895
0.61002	0.23939
0.61173	0.78865
0.60443	0.73916
0.60219	1.03128
0.58175	1.39532
0.60144	1.37928
0.59102	0.44622
0.61106	0.31607
0.5904	0.83011
0.60069	0.23229
0.59489	0.4844
0.48815	0.33534
0.561	5.57101
0.61735	0.49172
0.5984	1.74985
0.61933	0.40349
0.59141	1.50847
0.58631	1.724
0.59913	1.12036
0.58554	0.58789
0.59559	0.41179
0.60083	0.44774
0.5953	0.80387
0.60713	0.34668
0.60657	0.61025
0.61187	0.705
0.59288	0.86596
0.59555	0.34863
0.59695	2.01011
0.59702	2.02034
0.60784	0.64096
0.59591	1.88272
0.58706	0.88945
0.59777	0.49892
0.60723	1.01244
0.60091	0.68659
0.598	2.28252
0.61611	1.06093
0.60736	0.2435
0.59322	1.71447
0.58876	2.24223
0.60394	0.97148
0.59823	1.4909
0.5386	0.63598
0.6087	0.51084
0.59086	7.30294
0.59107	2.55019
0.60607	1.36771
0.60305	0.48393
0.59784	0.78616
0.59631	0.27242
0.59207	0.3689
0.60101	2.36491
0.60286	0.64355
0.59556	2.0069
0.60388	1.04413
0.60625	0.72834
0.60398	0.97929
0.59817	0.3149
0.58614	1.83466
0.60004	0.90171
0.58893	1.29677
0.60044	0.70858
0.59662	0.83923
0.59015	0.2558
0.61345	0.31042
0.28474	1.43854
0.59305	0.64284
0.59128	0.29418
0.58492	0.8862
0.59845	1.04245
0.61712	0.26648
0.6173	0.32749
0.61944	1.49648
0.55735	0.26581
0.61345	0.80223
0.60495	3.29975
0.61181	0.43987
0.56282	0.29156
0.6029	1.72449
0.5944	0.98141
0.58846	0.78394
0.59487	1.08691
0.58087	0.36721
0.58961	1.66475
0.5814	0.47801
0.47015	0.48653
0.61458	0.99575
0.58952	0.42066
0.60846	0.26001
0.58743	0.8587
0.57594	7.81631
0.59851	0.58316
0.59585	0.56735
0.60977	0.4072
0.58942	1.29207
0.59865	1.95072
0.61118	0.2524
0.58486	0.43899
0.61757	0.24147
0.61657	1.04749
0.59641	1.16613
0.61981	0.39724
0.59723	0.70614
0.5024	0.29872
0.60492	0.39821
0.60035	1.21593
0.604	0.78067
0.60544	0.91272
0.59082	3.73161
0.60078	0.9588
0.61132	0.45316
0.59658	1.74672
0.60111	0.26411
0.59552	1.7164
0.60252	0.74934
0.60504	0.88827
0.60833	0.46229
0.59609	0.34465
0.61105	0.62767
0.59293	1.21309
0.59309	0.7749
0.60084	0.47477
0.57995	0.67795
0.59362	0.95474
0.60802	0.92251
0.60496	0.26219
0.61104	0.3212
0.59845	1.22586
0.57404	4.78275
0.59025	1.57246
0.58336	10.8623
0.61943	0.51064
0.59655	3.52372
0.60898	0.44384
0.61489	0.74349
0.60682	1.19571
0.59053	0.38818
0.59101	1.22966
0.60795	0.61938
0.58574	2.03186
0.6	1.15005
0.58394	0.21681
0.61147	0.57354
0.61786	0.30145
0.58484	1.40326
0.59415	0.27514
0.59412	0.41148
0.39914	38.7751
0.59915	3.21531
0.60098	0.24451
0.61563	0.59149
0.59896	0.83501
0.16064	0.39036
0.61724	0.38633
0.58866	0.25687
0.59768	0.46263
0.53738	0.2537
0.59782	1.91054
0.60874	0.90244
0.59212	0.40755
0.6041	0.46899
0.61923	0.53957
0.609	0.56741
0.60217	0.93616
0.61561	0.20374
0.59549	0.31196
0.59002	1.00791
0.58978	0.70968
0.5911	0.35227
0.59739	0.86327
0.60256	3.67605
0.59739	0.41211
0.58527	1.24885
0.59057	0.84519
0.12928	9.40675
0.45953	0.66358
0.61554	0.46958
0.58089	1.12218
0.60356	0.4248
0.60818	0.41362
0.60205	0.3464
0.60608	0.27843
0.59892	1.68042
0.6049	0.71787
0.59924	1.78271
0.61853	0.20919
0.60257	1.05364
0.59189	0.68766
0.59768	1.41279
0.60888	0.50087
0.57182	0.37726
0.60212	0.44452
0.59647	1.07856
0.60617	0.50811
0.61561	0.30596
0.59022	0.88399
0.59992	0.69501
0.60564	3.12372
0.60721	0.43232
0.60548	1.93154
0.61469	0.79693
0.58313	1.1088
0.60207	1.29523
0.57779	0.4628
0.60279	0.35838
0.60803	1.06792
0.60731	2.03487
0.57579	0.20455
0.59804	2.21072
0.61394	0.23247
0.58999	2.59973
0.60849	0.36887
0.6006	0.89302
0.59973	0.60146
0.59214	0.3399
0.61984	0.28407
0.5979	0.45892
0.6016	0.9379
0.58674	1.31559
0.59113	0.32405
0.58726	0.43768
0.58812	1.03597
0.60583	0.27969
0.59023	2.03636
0.60283	0.44763
0.59506	0.78472
0.60584	1.33022
0.59162	1.07993
0.60367	0.52548
0.5809	0.26651
0.59965	1.29257
0.59163	1.05439
0.59427	0.58899
0.60091	0.55066
0.59365	0.39501
0.58298	0.56049
0.605	1.67298
0.61933	1.04464
0.58539	0.6528
0.52157	1.28456
0.57765	0.48561
0.45394	0.4474
0.45482	0.46966
0.56737	1.07743
0.50567	0.29175
0.114	27.8927
0.49262	0.97317
0.45319	2.03684
0.51658	0.46005
0.5724	0.68216
0.59508	1.36395
0.5872	0.43605
0.61723	0.6509
0.55944	1.72151
0.60175	1.65961
0.44006	1.18263
0.60737	1.21944
0.58977	2.01864
0.60259	0.47718
0.58976	2.04322
0.60283	0.50637
0.60176	2.22594
0.6012	0.35859
0.56637	0.32309
0.61844	0.35387
0.56302	3.14173
0.58976	0.62632
0.57796	0.39435
0.61034	0.6689
0.5808	5.07413
0.60992	0.99369
0.45518	1.86957
0.61165	0.25747
0.58387	1.15135
0.59894	0.89386
0.61845	0.4748
0.61301	0.21429
0.59381	1.5453
0.59192	0.33561
0.58484	1.62577
0.61505	0.34548
0.61357	0.65197
0.59156	0.41796
0.5996	4.04387
0.6021	0.50159
0.61009	1.05698
0.59298	1.73872
0.61524	0.62516
0.60499	0.75553
0.58863	1.00346
0.58986	1.72199
0.58723	0.86651
0.60686	2.71236
0.58513	0.77803
0.60077	0.8001
0.5942	1.67911
0.60056	0.93612
0.60478	0.30723
0.6107	0.66506
0.49844	0.38144
0.60195	0.93381
0.59816	1.5202
0.56596	10.8826
0.59839	0.83216
0.58932	2.05572
0.60595	0.5747
0.59628	0.70888
0.59501	1.2864
0.59289	6.26572
0.60009	1.71059
0.61582	0.26242
0.59628	3.12107
0.60774	0.25143
0.59213	3.50264
0.60197	1.45557
0.59933	0.25437
0.58714	1.54559
0.601	0.31108
0.60412	1.29148
0.59729	0.93841
0.61889	0.36257
0.60672	0.64236
0.56661	2.12617
0.60885	0.21589
0.55306	0.93741
0.60554	2.45793
0.60911	0.2884
0.60897	1.2496
0.58555	1.40671
0.58835	1.29529
0.59595	1.57338
0.60389	1.89099
0.59048	0.46705
0.60418	1.81538
0.59861	0.85765
0.59312	0.8576
0.59265	0.65187
0.56772	0.34172
0.60736	1.22583
0.59289	0.29884
0.59879	0.55134
0.59296	0.94884
0.58142	1.2138
0.61068	0.80211
0.5956	4.77103
0.61903	2.56612
0.6178	1.15089
0.44723	0.44537
0.15041	1.94917
0.59644	0.95805
0.60357	4.08944
0.61074	0.2277
0.58627	1.25597
0.59066	1.77895
0.58987	0.66716
0.47738	2.14211
0.58712	2.11183
0.59074	0.72744
0.58297	1.73831
0.61536	1.3983
0.60277	0.76705
0.60341	0.50422
0.61553	1.16638
0.60277	0.57966
0.61386	0.45214
0.59461	0.83877
0.59183	3.26608
0.60663	0.54205
0.57868	0.53778
0.6018	1.97045
0.60497	0.43717
0.60394	0.65897
0.59617	1.2111
0.57625	1.91148
0.61108	0.87047
0.603	1.11287
0.59631	0.50374
0.5796	1.26241
0.59197	2.44469
0.60161	1.16816
0.61732	1.67571
0.60095	0.59071
0.59153	1.66783
0.58704	0.79975
0.60232	2.27217
0.60004	1.71571
0.60305	1.55167
0.58725	2.43108
0.5898	0.8036
0.59693	1.98777
0.59779	1.08367
0.59643	0.48618
0.60272	0.66103
0.60223	3.05507
0.59517	0.71509
0.60278	0.68852
0.60381	1.21323
0.60685	0.25987
0.59495	0.72848
0.59897	3.49355
0.48604	10.9512
0.61531	0.69545
0.58252	2.29712
0.6162	0.54608
0.58929	1.83007
0.58871	1.80803
0.37017	2.33852
0.5879	1.55673
0.59878	0.85377
0.60657	0.51052
0.59726	1.13065
0.60107	0.53828
0.61309	0.49011
0.59437	1.09773
0.59733	0.69358
0.60268	1.60531
0.59784	0.29154
0.61269	0.48639
0.58927	0.93863
0.59247	0.76564
0.58495	0.84517
0.47013	0.85356
0.57078	0.38769
0.61624	0.35068
0.61606	0.39888
0.58394	10.0292
0.58733	17.6683
0.57988	2.07583
0.58873	0.48262
0.61769	0.40622
0.59467	0.36366
0.6015	0.61871
0.60669	1.7234
0.59775	0.83956
0.59416	0.43093
0.58563	1.85436
0.58909	2.06074
0.59562	0.78397
0.60833	1.34656
0.60505	4.83895
0.59712	0.3503
0.60979	0.43632
0.59407	0.44266
0.60252	0.79508
0.6154	0.43421
0.58656	1.57488
0.60462	1.26466
0.60431	0.74561
0.58856	2.13547
0.59092	0.8509
0.61643	0.66392
0.59472	0.83471
0.60216	0.25018
0.59348	0.47307
0.61877	0.25649
0.60496	0.35753
0.61147	1.64896
0.57507	9.58091
0.58096	0.24005
0.60585	0.59752
0.5882	1.30337
0.59766	2.60406
0.60914	0.6823
0.61069	0.2665
0.59254	1.66599
0.61508	0.64428
0.58451	0.60592
0.61079	0.73215
0.60173	0.72205
0.59348	0.51284
0.60332	0.38571
0.28064	0.62317
0.58864	1.27521
0.57279	1.88447
0.61358	0.54747
0.61699	0.83518
0.59022	4.56049
0.60542	0.69662
0.6047	0.607
0.60131	2.45477
0.6086	0.27537
0.59977	0.42872
0.58115	0.37529
0.59377	1.32021
0.60349	0.92309
0.59787	1.52997
0.59413	0.29928
0.58553	0.83765
0.60642	0.41468
0.60172	0.80728
0.59251	0.77515
0.59844	1.64786
0.6156	0.44731
0.58977	0.42776
0.59271	1.26736
0.60263	0.69562
0.59439	0.88715
0.58623	0.52649
0.59752	0.82407
0.59846	0.53656
0.59886	0.52697
0.60738	0.34614
0.61014	0.29983
0.5956	1.77573
0.59466	1.2646
0.61145	0.57109
0.60682	1.06781
0.58674	1.13078
0.59766	2.06271
0.60922	0.30668
0.59465	0.98251
0.59639	2.43582
0.61495	1.64332
0.60207	2.23083
0.61511	1.9358
0.60162	0.24607
0.60154	0.36664
0.60404	0.44642
0.57763	1.54405
0.61092	0.35993
0.59086	0.84436
0.5759	0.22663
0.5989	0.29534
0.59566	0.68023
0.60715	0.47537
0.59334	1.56736
0.56067	1.06507
0.60368	0.40328
0.61939	0.35108
0.59308	0.89541
0.59154	0.66512
0.59823	0.59072
0.59442	3.07415
0.60997	0.20249
0.60042	1.36087
0.61931	0.21177
0.51767	0.52724
0.57381	3.01242
0.60536	0.90232
0.60356	1.44497
0.59108	1.58229
0.59659	1.97664
0.58476	0.35055
0.60353	0.20621
0.60821	0.34077
0.59742	0.40628
0.59005	0.42135
0.61855	1.09663
0.61182	0.45931
0.61975	0.42589
0.60995	2.09306
0.61361	0.33597
0.59497	3.89808
0.58823	1.05855
0.61854	0.39799
0.59898	1.98763
0.58298	4.42085
0.60151	0.251
0.60118	5.22722
0.58607	0.34994
0.59627	1.16042
0.59571	6.88032
0.59719	0.60666
0.60144	2.57115
0.61334	0.43039
0.61977	0.35748
0.60123	1.17185
0.59774	1.08061
0.60485	0.96422
0.582	0.53165
0.56921	0.61456
0.5944	0.86282
0.58797	1.7384
0.5832	0.37278
0.60276	0.41162
0.61226	1.28278
0.59483	0.25909
0.57433	0.8146
0.58926	0.99018
0.58797	2.23913
0.59367	1.26678
0.60313	0.39647
0.59267	0.46303
0.61296	0.52871
0.61761	2.67978
0.59722	0.94599
0.57892	2.21557
0.59394	6.86454
0.60402	0.61632
0.59004	2.06006
0.58363	1.40329
0.60042	1.89892
0.59112	0.77081
0.60456	0.64364
0.59086	1.96769
0.57924	0.53942
0.59089	0.91656
0.61058	0.71411
0.57192	1.39865
0.58653	1.60281
0.58128	0.48715
0.58968	5.58409
0.60616	0.63768
0.60229	0.23863
0.6035	0.80301
0.58546	1.18484
0.59744	0.40709
0.59239	2.14922
0.60971	0.92449
0.59604	0.3953
0.61156	1.47134
0.61298	0.2982
0.60696	0.84239
0.61055	0.3266
0.59991	0.20624
0.60215	1.80963
0.60052	0.5164
0.61819	0.31096
0.60473	0.53709
0.60527	0.39461
0.59312	0.62055
0.53136	10.4788
0.45389	0.57583
0.48827	0.20513
0.59695	2.71952
0.59046	0.7849
0.59825	0.3851
0.60772	0.44949
0.57905	0.2266
0.54227	0.28851
0.58977	0.3315
0.57856	0.79351
0.59923	0.35213
0.58959	0.94265
0.61476	0.27448
0.59294	0.55763
0.59955	0.49889
0.59768	0.82743
0.60314	0.5029
0.60106	0.76838
0.5701	0.66193
0.60568	0.73829
0.58711	0.43481
0.59258	0.87375
0.59783	1.00865
0.59817	0.96221
0.61319	0.22152
0.57784	1.13947
0.60612	0.71851
0.60647	0.23322
0.60763	1.05132
0.58308	0.34603
0.61474	0.81844
0.56672	0.74987
0.61036	0.46542
0.59592	1.29934
0.5889	0.71947
0.60636	0.2256
0.59735	1.38231
0.61258	0.3078
0.59647	1.25795
0.5948	0.75693
0.61789	0.64007
0.59202	1.16404
0.59043	1.20819
0.58238	1.54313
0.59871	1.46837
0.59596	0.34614
0.61008	2.03925
0.58738	13.3429
0.59139	1.13295
0.59	0.34497
0.59948	0.66971
0.6061	0.89462
0.60565	0.59832
0.60717	1.46626
0.58426	0.32336
0.60167	0.56393
0.5977	1.44328
0.58754	0.76895
0.55537	0.30016
0.59443	1.29332
0.57919	0.27985
0.5932	2.50362
0.60165	0.64984
0.59661	3.18271
0.60275	0.51517
0.59431	0.33345
0.59798	1.02691
0.59834	1.26573
0.60801	1.46191
0.4861	0.60393
0.59238	2.55274
0.57447	3.14073
0.59643	0.52906
0.57381	1.89079
0.58793	3.65902
0.59568	0.2754
0.59172	0.95679
0.14254	8.38078
0.57058	0.44355
0.57226	2.0337
0.61921	0.34808
0.60669	0.89986
0.6124	0.30172
0.57737	6.92533
0.59553	3.2853
0.59838	0.94058
0.61107	0.5416
0.60412	1.67781
0.59786	0.70291
0.60414	0.99018
0.59049	2.95328
0.58562	0.72204
0.58737	0.9837
0.61268	0.3622
0.59718	0.33925
0.61218	0.23383
0.60737	0.75214
0.57876	0.46582
0.60184	0.46868
0.23817	2.23736
0.58764	1.038
0.60264	0.34168
0.59023	0.61461
0.61578	0.42716
0.59453	0.43868
0.61857	0.3319
0.59435	0.35205
0.60761	0.59946
0.5911	0.52634
0.59457	2.75329
0.58262	1.27717
0.60028	0.56644
0.60345	0.37411
0.59519	1.15409
0.59616	0.25702
0.59191	5.34412
0.57477	0.44556
0.58359	1.22815
0.5957	3.14647
0.60509	0.35697
0.38918	14.5722
0.59407	1.04701
0.61313	1.40254
0.59721	1.59242
0.61514	0.29502
0.60748	1.64248
0.58308	0.54759
0.61004	0.43009
0.60736	0.51804
0.59202	1.11102
0.60283	2.48282
0.60136	2.5027
0.59098	0.59712
0.60129	0.41585
0.55152	0.47635
0.59586	0.30475
0.60379	0.9219
0.61085	0.91823
0.60159	0.25039
0.6002	1.77862
0.59624	0.4072
0.59679	0.45536
0.61178	1.60332
0.60223	3.23198
0.61307	0.25161
0.60162	0.87136
0.59429	1.63296
0.58971	2.06411
0.6074	3.08381
0.60725	0.33353
0.61127	0.84337
0.59637	1.07707
0.59359	0.96253
0.59561	0.7777
0.59469	1.67121
0.5664	4.37456
0.41166	0.73349
0.58637	0.71235
0.5998	0.33162
0.60875	0.39302
0.61401	0.867
0.60883	0.60092
0.59403	1.01231
0.38525	0.25434
0.60665	0.79188
0.6152	0.4508
0.60693	0.49889
0.60635	1.17285
0.58104	0.52815
0.60129	0.38255
0.61891	0.47822
0.59999	0.42531
0.58134	1.03443
0.61114	0.94669
0.59763	0.32225
0.59111	2.10409
0.60681	1.96992
0.60167	0.6389
0.5956	0.44354
0.58848	1.20616
0.60276	1.2911
0.60163	0.6718
0.57705	1.95176
0.5981	1.09055
0.60143	0.42685
0.59352	0.48647
0.56748	1.00897
0.60208	3.18778
0.51398	0.91466
0.59501	0.90452
0.60215	0.84406
0.59746	0.46369
0.58322	1.16966
0.59895	0.47036
0.6133	7.13344
0.60488	0.46665
0.60523	0.28763
0.6007	0.80535
0.59863	0.94191
0.60287	0.89213
0.46249	2.92899
0.60153	0.42056
0.6083	0.34515
0.56173	0.51475
0.60938	0.35267
0.60084	3.80199
0.56956	0.37897
0.58659	1.16633
0.60459	0.70758
0.60423	0.51513
0.60799	1.39584
0.59411	0.54187
0.57156	2.31223
0.60062	2.04188
0.58318	1.54327
0.56722	0.2817
0.60985	0.70698
0.60356	0.60539
0.61301	1.17972
0.60206	0.56574
0.61812	0.80362
0.5883	2.7998
0.56891	0.6191
0.60626	0.44687
0.60979	0.47138
0.61061	1.24407
0.60488	0.49356
0.58526	0.35903
0.60805	0.39935
0.60214	0.91825
0.58934	1.29604
0.61865	0.3178
0.60854	0.56006
0.59614	1.59603
0.59503	0.70893
0.58211	0.47425
0.59241	0.92465
0.6028	0.24736
0.60893	0.22636
0.51133	2.02403
0.60274	0.71463
0.57035	0.84664
0.59483	0.66687
0.60926	0.38968
0.59315	0.68619
0.58308	0.66682
0.61733	0.29456
0.59812	1.53428
0.5809	2.05321
0.5926	0.70807
0.60157	0.59327
0.59304	0.57814
0.59683	0.98649
0.57729	0.65905
0.60906	0.63866
0.58589	0.67961
0.60725	0.83431
0.61119	5.6516
0.60992	1.28371
0.59801	1.32659
0.60743	1.29934
0.58894	0.39845
0.60392	0.67196
0.58381	0.87477
0.61249	0.27265
0.60212	2.08174
0.58954	0.61709
0.59519	0.431
0.5965	1.03531
0.59151	2.24521
[truncated: 3,273 more rows]
