# Supplementary material
Source: Research Square preprint supplement (doi:10.21203/rs.3.rs-9607376/v1)
Supplement: Supplementary file 4 [file b6808a0cfc6c90eb6b332dce.xlsx]

## Sheet: Fig. 3e
	Mean Ib/Io
WT-H41-10 MD	0.66442
WT-H41-10 EXP	0.6448
WT-H41-10R3(Cit) MD	0.65367
WT-H41-10R3(Cit) EXP	0.64554
EA-H41-10 MD	0.60501
EA-H41-10 EXP	0.59
EA-H41-10R3(Cit) MD	0.63544
EA-H41-10R3(Cit) EXP	0.623

## Sheet: Fig. 3f
	Time-averaged SMD force (pN)
WT-H41-10	287.065
WT-H41-10R3(Cit)	288.941
K238E-H41-10	342.771
K238E-H41-10R3(Cit)	234.248
R282A-H41-10	292.44
R282A-H41-10R3(Cit)	297.185
EA-H41-10	338.66
EA-H41-10R3(Cit)	246.177

## Sheet: Fig. 3g
	Force integral (kcal mol-1)
VDW-H41-10	2195.91
VDW-H41-10R3(Cit)	1677.74
ELEC-H41-10	4249.41
ELEC-H41-10R3(Cit)	4015.02
TOTAL-H41-10	6445.32
TOTAL-H41-10R3(Cit)	5692.76

## Sheet: Fig. 3n
PAD4
time (min)	Cit%-1	Cit%-2	Cit%-3	Cit% mean	Cit% s.d.
20	22.8	34.5	17	24.7667	8.91422
40	18.2	29.8	28.6	25.5333	6.37913
60	31.8	30.1	37.5	33.1333	3.87599
80	36	48.1	32.1	38.7333	8.34286
100	64.3	48.8	50.6	54.5667	8.47722
120	69.8	73.9	64.6	69.4333	4.66083
150	75	81.8	78.4	78.4	3.4
PAD4+inhibitor
20	0.06	1.1	1.3	0.82	0.66573
50	0.43	0.4	0.54	0.45667	0.07371
100	0.66	0	0.9	0.52	0.46605
150	0.16	1.1	0.6	0.62	0.47032
