# Supplementary material
Source: Research Square preprint supplement (doi:10.21203/rs.3.rs-9607376/v1)
Supplement: Supplementary file 5 [file c6845942f9e492893039f5ce.xlsx]

## Sheet: Fig. 2e
H41-10			H41-10R3(Cit)			Gaussian-fitting for H41-10			Gaussian-fitting for H41-10R3(Cit)			Mean Ib1/Io	Mean Ib2/Io	W1, h/2	W2, h/2	Rs
BlockDepth	Restime (ms)		BlockDepth	Restime (ms)		BlockDepth	Relative counts		BlockDepth	Relative counts		0.6448	0.64554	0.02921	0.03779	0.01299
0.65296	0.35714		0.64174	0.35647		0.005	0.00113		0.005	0.00306
0.64099	0.27865		0.65215	0.34996		0.00698	0.00113		0.00698	0.00306		WT nanopore
0.65255	0.56593		0.64494	0.35213		0.00797	0.00113		0.00797	0.00306
0.62618	0.63863		0.63578	0.38855		0.00896	0.00113		0.00896	0.00306
0.65112	0.33903		0.64254	0.27534		0.00995	0.00113		0.00995	0.00306
0.64047	0.96868		0.6435	0.2321		0.01095	0.00113		0.01095	0.00306
0.64854	0.50391		0.61853	0.33183		0.01194	0.00113		0.01194	0.00306
0.64445	0.26723		0.65307	0.28726		0.01293	0.00113		0.01293	0.00306
0.6457	1.74628		0.62885	0.56953		0.01392	0.00113		0.01392	0.00306
0.63418	0.70157		0.86725	0.21502		0.01491	0.00113		0.01491	0.00306
0.64372	0.7445		0.65918	0.22797		0.015	0.00113		0.015	0.00306
0.64244	0.25588		0.63832	0.72937		0.0159	0.00113		0.0159	0.00306
0.64381	0.83914		0.55321	0.91903		0.01689	0.00113		0.01689	0.00306
0.63443	1.3233		0.66429	0.25186		0.01788	0.00113		0.01788	0.00306
0.63484	0.68362		0.61562	0.26505		0.01887	0.00113		0.01887	0.00306
0.63334	0.65326		0.622	0.22347		0.01986	0.00113		0.01986	0.00306
0.63867	0.35549		0.62869	0.89092		0.02086	0.00113		0.02086	0.00306
0.63491	0.2684		0.63811	0.39537		0.02185	0.00113		0.02185	0.00306
0.64081	0.43471		0.64697	0.21961		0.02284	0.00113		0.02284	0.00306
0.64973	0.45567		0.59523	0.4121		0.02383	0.00113		0.02383	0.00306
0.63899	1.73105		0.58317	0.22303		0.02482	0.00113		0.02482	0.00306
0.62945	0.23009		0.63866	0.21992		0.025	0.00113		0.025	0.00306
0.62371	0.56269		0.63244	0.31184		0.02581	0.00113		0.02581	0.00306
0.65348	0.51393		0.64098	0.24389		0.0268	0.00113		0.0268	0.00306
0.61504	0.32088		0.7366	0.20363		0.02779	0.00113		0.02779	0.00306
0.64205	0.34994		0.63344	0.28288		0.02878	0.00113		0.02878	0.00306
0.63294	1.78564		0.63055	0.43164		0.02977	0.00113		0.02977	0.00306
0.61437	0.46164		0.92445	0.27508		0.03077	0.00113		0.03077	0.00306
0.64995	0.27096		0.63906	0.39422		0.03176	0.00113		0.03176	0.00306
0.63935	0.50231		0.62207	0.34449		0.03275	0.00113		0.03275	0.00306
0.63657	0.43864		0.63966	0.24614		0.03374	0.00113		0.03374	0.00306
0.65204	0.65195		0.65494	0.22427		0.03473	0.00113		0.03473	0.00306
0.62475	0.29888		0.62278	0.20185		0.035	0.00113		0.035	0.00306
0.63156	1.19568		0.62297	0.29156		0.03572	0.00113		0.03572	0.00306
0.64339	0.72321		0.65601	0.26664		0.03671	0.00113		0.03671	0.00306
0.64744	0.32457		0.64484	0.35931		0.0377	0.00113		0.0377	0.00306
0.64613	0.7213		0.41214	0.26752		0.03869	0.00113		0.03869	0.00306
0.91162	0.25575		0.65471	0.239		0.03968	0.00113		0.03968	0.00306
0.64895	0.25661		0.62471	0.64199		0.04068	0.00113		0.04068	0.00306
0.60012	0.60644		0.6561	0.32774		0.04167	0.00113		0.04167	0.00306
0.62601	0.43257		0.64231	0.21491		0.04266	0.00113		0.04266	0.00306
0.63571	0.21072		0.65584	0.25474		0.04365	0.00113		0.04365	0.00306
0.64756	0.69555		0.57952	0.82818		0.04464	0.00113		0.04464	0.00306
0.65238	0.24767		0.4827	0.28067		0.045	0.00113		0.045	0.00306
0.66453	0.23515		0.62737	0.67708		0.04563	0.00113		0.04563	0.00306
0.63209	0.94666		0.63115	0.21374		0.04662	0.00113		0.04662	0.00306
0.6418	0.3401		0.75505	0.23539		0.04761	0.00113		0.04761	0.00306
0.64675	0.59553		0.61297	0.42706		0.0486	0.00113		0.0486	0.00306
0.64777	0.51712		0.63652	0.61041		0.04959	0.00113		0.04959	0.00306
0.60684	0.83054		0.65386	0.28121		0.05059	0.00113		0.05059	0.00306
0.65137	0.30713		0.63595	0.23928		0.05158	0.00113		0.05158	0.00306
0.63212	0.20293		0.57407	0.28955		0.05257	0.00113		0.05257	0.00306
0.6414	0.53869		0.64027	0.30819		0.05356	0.00113		0.05356	0.00306
0.63423	0.77183		0.61106	0.4117		0.05455	0.00113		0.05455	0.00306
0.63939	0.97536		0.64978	0.7412		0.055	0.00113		0.055	0.00306
0.63413	0.74006		0.64274	0.36453		0.05554	0.00113		0.05554	0.00306
0.6396	0.31164		0.4866	0.24328		0.05653	0.00113		0.05653	0.00306
0.64581	0.33119		0.63563	0.40084		0.05752	0.00113		0.05752	0.00306
0.63729	0.6754		0.6469	0.47491		0.05851	0.00113		0.05851	0.00306
0.635	0.52517		0.63615	0.31192		0.0595	0.00113		0.0595	0.00306
0.63025	0.21238		0.62368	0.38621		0.0605	0.00113		0.0605	0.00306
0.60713	1.10117		0.91101	0.29028		0.06149	0.00113		0.06149	0.00306
0.63498	0.21593		0.64972	0.48686		0.06248	0.00113		0.06248	0.00306
0.60812	1.06143		0.62253	0.38592		0.06347	0.00113		0.06347	0.00306
0.65567	0.21962		0.61275	0.22848		0.06446	0.00113		0.06446	0.00306
0.63873	0.60388		0.64518	0.33515		0.065	0.00113		0.065	0.00306
0.64636	0.49535		0.60207	0.37058		0.06545	0.00113		0.06545	0.00306
0.63906	0.6244		0.60976	0.28704		0.06644	0.00113		0.06644	0.00306
0.64165	0.66034		0.64728	0.3428		0.06743	0.00113		0.06743	0.00306
0.66012	0.387		0.67185	0.36964		0.06842	0.00113		0.06842	0.00306
0.64126	0.31568		0.42817	0.37952		0.06941	0.00113		0.06941	0.00306
0.65631	0.31543		0.6212	0.29877		0.07041	0.00113		0.07041	0.00306
0.64039	0.95128		0.63215	0.31246		0.0714	0.00113		0.0714	0.00306
0.65214	0.3278		0.63468	0.31466		0.07239	0.00113		0.07239	0.00306
0.61295	0.46442		0.63522	0.5455		0.07338	0.00113		0.07338	0.00306
0.65783	0.27925		0.65624	0.36527		0.07437	0.00113		0.07437	0.00306
0.62432	0.68989		0.64146	0.46334		0.075	0.00113		0.075	0.00306
0.64375	0.5774		0.64195	0.21416		0.07536	0.00113		0.07536	0.00306
0.63409	0.42984		0.64617	0.39109		0.07635	0.00113		0.07635	0.00306
0.64261	0.23226		0.65597	0.25112		0.07734	0.00113		0.07734	0.00306
0.6417	1.28249		0.72639	1.19773		0.07833	0.00113		0.07833	0.00306
0.66169	0.48446		0.64194	0.21126		0.07932	0.00113		0.07932	0.00306
0.64476	0.26824		0.61425	0.27521		0.08032	0.00113		0.08032	0.00306
0.63549	0.50277		0.64146	0.29048		0.08131	0.00113		0.08131	0.00306
0.63558	0.44438		0.64036	0.24703		0.0823	0.00113		0.0823	0.00306
0.64323	0.24627		0.66265	0.56305		0.08329	0.00113		0.08329	0.00306
0.6471	0.80264		0.67799	0.25864		0.08428	0.00113		0.08428	0.00306
0.69043	0.27454		0.62195	0.21906		0.085	0.00113		0.085	0.00306
0.67142	0.23997		0.41708	0.45877		0.08527	0.00113		0.08527	0.00306
0.63665	0.79846		0.65387	0.21935		0.08626	0.00113		0.08626	0.00306
0.63733	0.3317		0.57795	0.57204		0.08725	0.00113		0.08725	0.00306
0.64715	0.39004		0.66632	0.207		0.08824	0.00113		0.08824	0.00306
0.65605	0.20023		0.63579	0.36964		0.08923	0.00113		0.08923	0.00306
0.62821	0.27226		0.64018	0.35645		0.09023	0.00113		0.09023	0.00306
0.6001	0.81855		0.62708	0.24474		0.09122	0.00113		0.09122	0.00306
0.63169	0.29178		0.89247	0.2033		0.09221	0.00113		0.09221	0.00306
0.60901	0.43251		0.63548	0.26607		0.0932	0.00113		0.0932	0.00306
0.61792	0.27974		0.90205	0.22373		0.09419	0.00113		0.09419	0.00306
0.63198	0.48235		0.62474	0.24529		0.095	0.00113		0.095	0.00306
0.63275	0.33092		0.65665	0.24744		0.09518	0.00113		0.09518	0.00306
0.64935	0.74367		0.64004	0.31459		0.09617	0.00113		0.09617	0.00306
0.64737	0.29539		0.93627	0.25994		0.09716	0.00113		0.09716	0.00306
0.63846	0.49038		0.6402	0.68186		0.09815	0.00113		0.09815	0.00306
0.64479	0.31626		0.36783	0.41779		0.09914	0.00113		0.09914	0.00306
0.64238	0.76774		0.65065	0.30479		0.10014	0.00113		0.10014	0.00306
0.65689	0.38663		0.66514	0.25587		0.10113	0.00113		0.10113	0.00306
0.61131	0.45432		0.64933	0.59118		0.10212	0.00113		0.10212	0.00306
0.61895	0.36876		0.63058	0.22202		0.10311	0.00113		0.10311	0.00306
0.6414	0.50756		0.64841	0.34215		0.1041	0.00113		0.1041	0.00306
0.64952	0.34616		0.6208	0.52296		0.105	0.00113		0.105	0.00306
0.65782	0.37456		0.62943	0.50587		0.10509	0.00113		0.10509	0.00306
0.64669	0.21241		0.62864	0.5128		0.10608	0.00113		0.10608	0.00306
0.63259	0.43186		0.65157	0.2324		0.10707	0.00113		0.10707	0.00306
0.63927	0.40042		0.62403	0.41665		0.10806	0.00113		0.10806	0.00306
0.64891	0.2038		0.64798	0.21053		0.10905	0.00113		0.10905	0.00306
0.62567	0.49099		0.64063	0.24032		0.11005	0.00113		0.11005	0.00306
0.63217	0.30725		0.64377	0.43112		0.11104	0.00113		0.11104	0.00306
0.63734	0.77077		0.63833	0.35993		0.11203	0.00113		0.11203	0.00306
0.64767	0.3468		0.62542	0.37247		0.11302	0.00113		0.11302	0.00306
0.62888	0.29232		0.63865	0.44409		0.11401	0.00113		0.11401	0.00306
0.63769	0.53153		0.61799	0.5882		0.115	0.00113		0.115	0.00306
0.63315	0.68802		0.6313	0.54742		0.115	0.00113		0.115	0.00306
0.65887	0.53398		0.62877	0.21961		0.11599	0.00113		0.11599	0.00306
0.64769	0.30287		0.64162	0.4465		0.11698	0.00113		0.11698	0.00306
0.63344	0.54625		0.65092	0.22245		0.11797	0.00113		0.11797	0.00306
0.63212	0.24387		0.99074	0.25424		0.11896	0.00113		0.11896	0.00306
0.65379	0.45585		0.91501	0.24728		0.11995	0.00113		0.11995	0.00306
0.63957	0.20499		0.50772	0.26737		0.12095	0.00113		0.12095	0.00306
0.59695	2.76339		0.97709	0.21131		0.12194	0.00113		0.12194	0.00306
0.62463	0.25251		0.23518	0.29225		0.12293	0.00113		0.12293	0.00306
0.64317	0.98186		0.97264	0.23553		0.12392	0.00113		0.12392	0.00306
0.64832	0.4356		0.64042	0.31551		0.12491	0.00113		0.12491	0.00306
0.63189	0.22353		0.63512	0.4151		0.125	0.00113		0.125	0.00306
0.6466	0.9547		0.61434	0.20884		0.1259	0.00113		0.1259	0.00306
0.64779	0.5788		0.61099	0.49642		0.12689	0.00113		0.12689	0.00306
0.63558	0.59238		0.63478	0.25317		0.12788	0.00113		0.12788	0.00306
0.65399	0.28907		0.62248	0.28216		0.12887	0.00113		0.12887	0.00306
0.63925	0.94756		0.65567	0.37317		0.12986	0.00113		0.12986	0.00306
0.64337	0.23853		0.64027	0.30286		0.13086	0.00113		0.13086	0.00306
0.66457	0.23439		0.68459	0.39603		0.13185	0.00113		0.13185	0.00306
0.54256	1.10327		0.66186	0.20764		0.13284	0.00113		0.13284	0.00306
0.64779	0.33097		0.66326	0.25815		0.13383	0.00113		0.13383	0.00306
0.62369	1.72669		0.80895	1.29966		0.13482	0.00113		0.13482	0.00306
0.64401	1.26733		0.94141	0.39985		0.135	0.00113		0.135	0.00306
0.63829	0.36381		0.94894	0.82597		0.13581	0.00113		0.13581	0.00306
0.65472	0.74392		0.9292	0.5745		0.1368	0.00113		0.1368	0.00306
0.68433	0.42298		0.93473	0.21847		0.13779	0.00113		0.13779	0.00306
0.64665	0.90958		0.91427	0.23622		0.13878	0.00113		0.13878	0.00306
0.64942	0.29638		0.9082	0.26375		0.13977	0.00113		0.13977	0.00306
0.64005	0.25003		0.9344	0.31933		0.14077	0.00113		0.14077	0.00306
0.65316	0.35119		0.88404	0.36342		0.14176	0.00113		0.14176	0.00306
0.64218	0.45335		0.93283	0.74016		0.14275	0.00113		0.14275	0.00306
0.64441	0.29104		0.92283	1.13618		0.14374	0.00113		0.14374	0.00306
0.61546	0.47513		0.89816	0.47988		0.14473	0.00113		0.14473	0.00306
0.62682	0.3989		0.92387	0.38451		0.145	0.00113		0.145	0.00306
0.652	0.27181		0.91122	0.22511		0.14572	0.00113		0.14572	0.00306
0.64575	0.74078		0.93464	0.40026		0.14671	0.00113		0.14671	0.00306
0.6581	0.32756		0.94562	0.46288		0.1477	0.00113		0.1477	0.00306
0.63811	1.71466		0.94777	0.46016		0.14869	0.00113		0.14869	0.00306
0.62479	0.73905		0.89989	0.29637		0.14968	0.00113		0.14968	0.00306
0.65407	0.25926		0.9177	0.42461		0.15068	0.00113		0.15068	0.00306
0.64224	0.24598		0.92328	0.81712		0.15167	0.00113		0.15167	0.00306
0.63256	0.40057		0.92201	0.2636		0.15266	0.00113		0.15266	0.00306
0.63298	1.09133		0.93888	0.47578		0.15365	0.00113		0.15365	0.00306
0.62028	0.25405		0.92786	0.21493		0.15464	0.00113		0.15464	0.00306
0.6521	0.30805		0.93364	0.31674		0.155	0.00113		0.155	0.00306
0.64598	0.41126		0.91083	0.83635		0.15563	0.00113		0.15563	0.00306
0.6353	0.77776		0.93814	0.26721		0.15662	0.00113		0.15662	0.00306
0.64707	0.20892		0.88603	0.21186		0.15761	0.00113		0.15761	0.00306
0.6488	1.18347		0.92512	1.28051		0.1586	0.00113		0.1586	0.00306
0.66059	0.27182		0.93916	0.51439		0.15959	0.00113		0.15959	0.00306
0.64225	0.47085		0.92864	0.26373		0.16059	0.00113		0.16059	0.00306
0.62037	0.41837		0.87562	0.21654		0.16158	0.00113		0.16158	0.00306
0.62305	0.24295		0.93838	0.33936		0.16257	0.00113		0.16257	0.00306
0.64004	1.29507		0.92589	0.27486		0.16356	0.00113		0.16356	0.00306
0.62782	0.53525		0.9184	1.7125		0.16455	0.00113		0.16455	0.00306
0.63989	0.59693		0.94562	0.56723		0.165	0.00113		0.165	0.00306
0.63397	0.54913		0.8898	0.84075		0.16554	0.00113		0.16554	0.00306
0.64503	1.28195		0.90497	0.35552		0.16653	0.00113		0.16653	0.00306
0.64635	0.84444		0.9128	1.82744		0.16752	0.00113		0.16752	0.00306
0.64455	0.36743		0.89612	0.51845		0.16851	0.00113		0.16851	0.00306
0.63864	0.26351		0.93717	0.2462		0.1695	0.00113		0.1695	0.00306
0.63223	0.97884		0.93901	0.35514		0.1705	0.00113		0.1705	0.00306
0.64444	0.37227		0.93713	0.54428		0.17149	0.00113		0.17149	0.00306
0.63917	0.59682		0.93955	0.20193		0.17248	0.00113		0.17248	0.00306
0.6604	0.50717		0.91445	0.37375		0.17347	0.00113		0.17347	0.00306
0.65274	0.60337		0.94184	0.76763		0.17446	0.00113		0.17446	0.00306
0.64365	0.77974		0.91979	0.2507		0.175	0.00113		0.175	0.00306
0.65094	0.67279		0.93414	0.36406		0.17545	0.00113		0.17545	0.00306
0.64232	0.2775		0.93823	0.41942		0.17644	0.00113		0.17644	0.00306
0.65829	0.27735		0.92517	0.6057		0.17743	0.00113		0.17743	0.00306
0.61685	0.7794		0.94393	0.28658		0.17842	0.00113		0.17842	0.00306
0.64075	0.26296		0.92511	0.51635		0.17941	0.00113		0.17941	0.00306
0.64	0.76685		0.93222	0.24325		0.18041	0.00113		0.18041	0.00306
0.89807	0.25042		0.94729	0.62758		0.1814	0.00113		0.1814	0.00306
0.65074	0.34657		0.90073	0.20868		0.18239	0.00113		0.18239	0.00306
0.64113	0.72415		0.93917	0.24576		0.18338	0.00113		0.18338	0.00306
0.6514	0.75642		0.93527	0.55317		0.18437	0.00113		0.18437	0.00306
0.66341	0.23207		0.93078	0.29109		0.185	0.00113		0.185	0.00306
0.64854	0.6342		0.9041	0.33163		0.18536	0.00113		0.18536	0.00306
0.65689	0.42351		0.92577	0.61634		0.18635	0.00113		0.18635	0.00306
0.64786	0.3434		0.94558	0.29979		0.18734	0.00113		0.18734	0.00306
0.6552	0.72854		0.9398	0.49362		0.18833	0.00113		0.18833	0.00306
0.6516	0.43154		0.94261	0.30724		0.18932	0.00113		0.18932	0.00306
0.63762	0.67057		0.92481	0.60923		0.19032	0.00113		0.19032	0.00306
0.6609	0.26325		0.92402	0.78569		0.19131	0.00113		0.19131	0.00306
0.60032	0.72316		0.92681	0.29401		0.1923	0.00113		0.1923	0.00306
0.63668	0.48407		0.94467	1.61117		0.19329	0.00113		0.19329	0.00306
0.62763	0.29284		0.93579	0.94673		0.19428	0.00113		0.19428	0.00306
0.66086	0.24067		0.93922	0.41712		0.195	0.00113		0.195	0.00306
0.6481	0.8956		0.93648	0.47033		0.19527	0.00113		0.19527	0.00306
0.65127	0.31322		0.91409	0.33912		0.19626	0.00113		0.19626	0.00306
0.60595	0.30484		0.9176	0.46544		0.19725	0.00113		0.19725	0.00306
0.67351	0.71997		0.92598	0.55635		0.19824	0.00113		0.19824	0.00306
0.63913	0.28235		0.92804	0.3818		0.19923	0.00113		0.19923	0.00306
0.61641	0.81559		0.90554	0.25003		0.20023	0.00113		0.20023	0.00306
0.6361	0.56792		0.92274	0.53319		0.20122	0.00113		0.20122	0.00306
0.64065	0.44853		0.94735	0.85225		0.20221	0.00113		0.20221	0.00306
0.63699	0.44675		0.90446	0.34484		0.2032	0.00113		0.2032	0.00306
0.63676	0.59617		0.93578	0.23949		0.20419	0.00113		0.20419	0.00306
0.66288	0.24782		0.9275	0.49853		0.205	0.00113		0.205	0.00306
0.65725	0.27425		0.92215	1.13408		0.20518	0.00113		0.20518	0.00306
0.65605	0.30937		0.92047	0.29323		0.20617	0.00113		0.20617	0.00306
0.64854	0.50476		0.93022	0.37612		0.20716	0.00113		0.20716	0.00306
0.64637	0.39553		0.63549	0.74567		0.20815	0.00113		0.20815	0.00306
0.63834	0.52431		0.62681	0.35926		0.20914	0.00113		0.20914	0.00306
0.64654	0.37598		0.64427	0.27953		0.21014	0.00113		0.21014	0.00306
0.62939	0.41151		0.65639	0.34312		0.21113	0.00113		0.21113	0.00306
0.65797	0.32653		0.63687	0.88431		0.21212	0.00113		0.21212	0.00306
0.63804	0.5001		0.66052	0.29012		0.21311	0.00113		0.21311	0.00306
0.64549	0.30908		0.62706	0.22567		0.2141	0.00113		0.2141	0.00306
0.65665	0.92041		0.81462	0.209		0.215	0.00113		0.215	0.00306
0.63747	0.5717		0.63758	0.60483		0.21509	0.00113		0.21509	0.00306
0.64327	0.22351		0.65635	0.20275		0.21608	0.00113		0.21608	0.00306
0.64228	0.27221		0.64393	0.68371		0.21707	0.00113		0.21707	0.00306
0.61979	1.06703		0.63473	0.22312		0.21806	0.00113		0.21806	0.00306
0.64151	0.43741		0.65123	0.23113		0.21905	0.00113		0.21905	0.00306
0.64775	0.73136		0.89699	0.2874		0.22005	0.00113		0.22005	0.00306
0.64549	1.04451		0.63873	0.29993		0.22104	0.00113		0.22104	0.00306
0.64095	0.44074		0.94	0.21924		0.22203	0.00113		0.22203	0.00306
0.62302	0.34935		0.61492	0.32977		0.22302	0.00113		0.22302	0.00306
0.64437	0.45893		0.20177	0.28954		0.22401	0.00113		0.22401	0.00306
0.60707	0.54289		0.92055	0.28794		0.225	0.00113		0.225	0.00306
0.65838	0.28764		0.60674	0.342		0.225	0.00113		0.225	0.00306
0.65269	0.76671		0.65591	0.29679		0.22599	0.00113		0.22599	0.00306
0.63716	0.2276		0.89356	0.21931		0.22698	0.00113		0.22698	0.00306
0.63663	1.94831		0.65012	0.34547		0.22797	0.00113		0.22797	0.00306
0.60773	0.30786		0.59656	0.25011		0.22896	0.00113		0.22896	0.00306
0.65057	0.44798		0.63094	0.34355		0.22995	0.00113		0.22995	0.00306
0.65495	0.30369		0.66021	0.47079		0.23095	0.00113		0.23095	0.00306
0.62959	0.26623		0.6129	0.29129		0.23194	0.00113		0.23194	0.00306
0.68194	0.25497		0.63393	0.45566		0.23293	0.00113		0.23293	0.00306
0.58054	0.81947		0.6217	0.24781		0.23392	0.00113		0.23392	0.00306
0.61521	0.21912		0.71447	0.20537		0.23491	0.00113		0.23491	0.00306
0.65324	0.4453		0.65537	0.26976		0.235	0.00113		0.235	0.00306
0.64686	0.43563		0.66085	0.2077		0.2359	0.00113		0.2359	0.00306
0.58736	0.24041		0.64341	0.33738		0.23689	0.00113		0.23689	0.00306
0.62305	0.2805		0.80198	0.20252		0.23788	0.00113		0.23788	0.00306
0.63525	0.72799		0.63538	0.44342		0.23887	0.00113		0.23887	0.00306
0.65742	0.29552		0.64217	0.34427		0.23986	0.00113		0.23986	0.00306
0.65226	0.2758		0.64141	0.2516		0.24086	0.00113		0.24086	0.00306
0.65785	0.22841		0.63815	0.20767		0.24185	0.00113		0.24185	0.00306
0.63487	1.4149		0.64574	0.35472		0.24284	0.00113		0.24284	0.00306
0.64364	0.80038		0.62818	0.33878		0.24383	0.00113		0.24383	0.00306
0.6537	0.32877		0.64176	0.83085		0.24482	0.00113		0.24482	0.00306
0.60826	0.32324		0.65131	0.29602		0.245	0.00113		0.245	0.00306
0.6651	0.24623		0.63148	0.30616		0.24581	0.00113		0.24581	0.00306
0.65421	0.72623		0.60621	0.25146		0.2468	0.00113		0.2468	0.00306
0.63514	0.33567		0.60705	0.29766		0.24779	0.00113		0.24779	0.00306
0.64224	0.65155		0.63184	0.20301		0.24878	0.00113		0.24878	0.00306
0.65564	0.33961		0.63033	0.54246		0.24977	0.00113		0.24977	0.00306
0.62151	0.60424		0.64787	0.40703		0.25077	0.00113		0.25077	0.00306
0.69393	0.26564		0.46885	0.27897		0.25176	0.00113		0.25176	0.00306
0.64731	0.21828		0.63176	0.37579		0.25275	0.00113		0.25275	0.00306
0.63076	0.36651		0.64515	0.38579		0.25374	0.00113		0.25374	0.00306
0.65816	0.23923		0.64001	0.24682		0.25473	0.00113		0.25473	0.00306
0.59479	0.78445		0.64381	0.31466		0.255	0.00113		0.255	0.00306
0.63136	0.62476		0.66676	0.21604		0.25572	0.00113		0.25572	0.00306
0.6245	0.21088		0.62495	0.70326		0.25671	0.00113		0.25671	0.00306
0.64831	0.51478		0.64897	0.72748		0.2577	0.00113		0.2577	0.00306
0.62949	0.35893		0.65426	0.32262		0.25869	0.00113		0.25869	0.00306
0.63944	0.20722		0.62812	0.42889		0.25968	0.00113		0.25968	0.00306
0.63125	0.34076		0.61295	0.23115		0.26068	0.00113		0.26068	0.00306
0.63141	0.55093		0.64874	0.43914		0.26167	0.00113		0.26167	0.00306
0.64317	0.24784		0.31374	0.32696		0.26266	0.00113		0.26266	0.00306
0.65087	0.25989		0.63416	0.26569		0.26365	0.00113		0.26365	0.00306
0.64373	0.32317		0.6363	0.23145		0.26464	0.00113		0.26464	0.00306
0.64995	1.18552		0.64364	0.32388		0.265	0.00113		0.265	0.00306
0.64956	0.39021		0.67095	0.27674		0.26563	0.00113		0.26563	0.00306
0.64276	0.99521		0.6808	0.2719		0.26662	0.00113		0.26662	0.00306
0.61494	0.22185		0.65206	0.35656		0.26761	0.00113		0.26761	0.00306
0.6151	0.20382		0.63088	0.53121		0.2686	0.00113		0.2686	0.00306
0.6344	0.24868		0.66516	0.28379		0.26959	0.00113		0.26959	0.00306
0.63677	0.59145		0.62645	0.32858		0.27059	0.00113		0.27059	0.00306
0.64154	0.46831		0.65936	0.34393		0.27158	0.00113		0.27158	0.00306
0.63209	0.32298		0.51905	0.31321		0.27257	0.00113		0.27257	0.00306
0.63174	0.39101		0.64351	0.21388		0.27356	0.00113		0.27356	0.00306
0.65552	0.40666		0.63156	0.25477		0.27455	0.00113		0.27455	0.00306
0.6407	0.57754		0.60707	0.27611		0.275	0.00113		0.275	0.00306
0.61358	0.24459		0.63057	0.29291		0.27554	0.00113		0.27554	0.00306
0.61408	0.20804		0.6016	0.30676		0.27653	0.00113		0.27653	0.00306
0.62897	0.22021		0.65348	0.53529		0.27752	0.00113		0.27752	0.00306
0.64038	0.7649		0.73416	1.20327		0.27851	0.00113		0.27851	0.00306
0.64062	1.29503		0.67244	0.30552		0.2795	0.00113		0.2795	0.00306
0.64206	0.27015		0.49251	0.21544		0.2805	0.00113		0.2805	0.00306
0.61345	0.56801		0.64205	0.34773		0.28149	0.00113		0.28149	0.00306
0.63197	0.81067		0.95322	0.2232		0.28248	0.00113		0.28248	0.00306
0.64464	0.34982		0.65743	0.20014		0.28347	0.00113		0.28347	0.00306
0.6432	0.41765		0.63882	0.46703		0.28446	0.00113		0.28446	0.00306
0.65894	0.93409		0.6249	0.20342		0.285	0.00113		0.285	0.00306
0.639	0.75246		0.42499	0.30377		0.28545	0.00113		0.28545	0.00306
0.65774	0.31589		0.62275	0.20191		0.28644	0.00113		0.28644	0.00306
0.655	0.27906		0.64112	0.54265		0.28743	0.00113		0.28743	0.00306
0.64915	1.13004		0.64259	0.32807		0.28842	0.00113		0.28842	0.00306
0.9082	0.21168		0.63967	0.23375		0.28941	0.00113		0.28941	0.00306
0.64171	0.51477		0.65033	0.20714		0.29041	0.00113		0.29041	0.00306
0.63311	0.60727		0.63732	0.21042		0.2914	0.00113		0.2914	0.00306
0.6474	0.7646		0.63494	0.26008		0.29239	0.00113		0.29239	0.00306
0.64584	0.48323		0.62386	0.30444		0.29338	0.00113		0.29338	0.00306
0.64564	0.32671		0.62795	0.46743		0.29437	0.00113		0.29437	0.00306
0.62597	0.55745		0.64436	0.2042		0.295	0.00113		0.295	0.00306
0.64662	0.23908		0.68434	0.22323		0.29536	0.00113		0.29536	0.00306
0.66647	0.21892		0.66207	0.22286		0.29635	0.00113		0.29635	0.00306
0.63375	0.33285		0.71969	0.77108		0.29734	0.00113		0.29734	0.00306
0.60978	0.78767		0.66169	0.20402		0.29833	0.00113		0.29833	0.00306
0.6224	0.27405		0.32574	0.65396		0.29932	0.00113		0.29932	0.00306
0.63665	0.49876		0.66001	0.23061		0.30032	0.00113		0.30032	0.00306
0.626	0.27994		0.48289	0.31516		0.30131	0.00113		0.30131	0.00306
0.6458	0.2959		0.64622	0.24928		0.3023	0.00113		0.3023	0.00306
0.6572	0.25142		0.63704	0.39546		0.30329	0.00113		0.30329	0.00306
0.64316	0.38782		0.64317	0.34932		0.30428	0.00113		0.30428	0.00306
0.63618	0.20802		0.66245	0.4338		0.305	0.00113		0.305	0.00306
0.64576	0.45428		0.97664	0.243		0.30527	0.00113		0.30527	0.00306
0.64987	0.45577		0.67906	0.25419		0.30626	0.00113		0.30626	0.00306
0.62386	0.27539		0.62501	0.23107		0.30725	0.00113		0.30725	0.00306
0.64546	0.33858		0.62231	0.38447		0.30824	0.00113		0.30824	0.00306
0.64855	1.38767		0.62804	0.24612		0.30923	0.00113		0.30923	0.00306
0.62564	0.56184		0.19296	0.69762		0.31023	0.00113		0.31023	0.00306
0.62936	0.98701		0.63295	0.20274		0.31122	0.00113		0.31122	0.00306
0.63923	0.41146		0.66097	0.40774		0.31221	0.00113		0.31221	0.00306
0.65226	0.28755		0.62053	0.25615		0.3132	0.00113		0.3132	0.00306
0.64318	0.28865		0.71876	0.22424		0.31419	0.00113		0.31419	0.00306
0.64786	0.43149		0.64089	0.31035		0.315	0.00113		0.315	0.00306
0.65059	0.54676		0.64457	0.22254		0.31518	0.00113		0.31518	0.00306
0.63387	0.24728		0.67721	0.20381		0.31617	0.00113		0.31617	0.00306
0.63258	0.28989		0.67777	0.20742		0.31716	0.00113		0.31716	0.00306
0.64378	0.41555		0.63941	0.32091		0.31815	0.00113		0.31815	0.00306
0.65524	0.36211		0.66933	0.33113		0.31914	0.00113		0.31914	0.00306
0.66061	0.2196		0.60568	0.3479		0.32014	0.00113		0.32014	0.00306
0.63877	0.35999		0.66814	0.20775		0.32113	0.00113		0.32113	0.00306
0.65127	0.42608		0.23692	0.24407		0.32212	0.00113		0.32212	0.00306
0.6654	0.52908		0.6227	0.5278		0.32311	0.00113		0.32311	0.00306
0.64303	0.28423		0.79329	0.20142		0.3241	0.00113		0.3241	0.00306
0.64954	0.66457		0.70277	0.27622		0.325	0.00113		0.325	0.00306
0.66276	0.26214		0.6713	0.37951		0.32509	0.00113		0.32509	0.00306
0.63949	0.37755		0.64536	0.21164		0.32608	0.00113		0.32608	0.00306
0.65847	0.46196		0.62361	0.24365		0.32707	0.00113		0.32707	0.00306
0.63474	0.61492		0.65166	0.20111		0.32806	0.00113		0.32806	0.00306
0.64343	1.43055		0.41007	0.472		0.32905	0.00113		0.32905	0.00306
0.64881	0.3448		0.64786	0.27397		0.33005	0.00113		0.33005	0.00306
0.62913	0.33634		0.6361	0.24529		0.33104	0.00113		0.33104	0.00306
0.64553	0.6321		0.62376	0.21025		0.33203	0.00113		0.33203	0.00306
0.64963	0.53526		0.63375	0.26853		0.33302	0.00113		0.33302	0.00306
0.64442	0.52235		0.67577	0.29459		0.33401	0.00113		0.33401	0.00306
0.6429	0.5363		0.60974	0.31255		0.335	0.00113		0.335	0.00306
0.72841	0.2196		0.6605	0.28639		0.33599	0.00113		0.33599	0.00306
0.64774	0.38114		0.615	0.28636		0.33698	0.00113		0.33698	0.00306
0.64366	0.37635		0.65656	0.3539		0.33797	0.00113		0.33797	0.00306
0.64598	0.70302		0.65806	0.35263		0.33896	0.00113		0.33896	0.00306
0.64893	0.24207		0.65195	0.23851		0.33995	0.00113		0.33995	0.00306
0.63364	0.63785		0.6377	0.45401		0.34095	0.00113		0.34095	0.00306
0.59962	1.11409		0.65865	0.35556		0.34194	0.00113		0.34194	0.00306
0.63601	0.45676		0.66026	0.27358		0.34293	0.00113		0.34293	0.00306
0.63256	0.33241		0.6417	0.20681		0.34392	0.00113		0.34392	0.00306
0.64138	0.44693		0.61623	0.27732		0.34491	0.00113		0.34491	0.00306
0.66555	0.38758		0.34392	0.97615		0.345	0.00113		0.345	0.00306
0.64923	0.492		0.62357	0.22933		0.3459	0.00113		0.3459	0.00306
0.63414	0.29146		0.47675	0.78516		0.34689	0.00113		0.34689	0.00306
0.6693	0.20035		0.63191	0.41491		0.34788	0.00113		0.34788	0.00306
0.65969	0.29077		0.67997	0.2631		0.34887	0.00113		0.34887	0.00306
0.63922	0.27267		0.67502	0.27496		0.34986	0.00113		0.34986	0.00306
0.61181	0.23062		0.65869	0.32137		0.35086	0.00113		0.35086	0.00306
0.60251	1.19536		0.66605	0.34778		0.35185	0.00113		0.35185	0.00306
0.63992	0.56438		0.61801	0.29644		0.35284	0.00113		0.35284	0.00306
0.64845	0.35861		0.22575	0.57145		0.35383	0.00113		0.35383	0.00306
0.64717	0.6684		0.6579	0.27097		0.35482	0.00113		0.35482	0.00306
0.63804	0.41581		0.63047	0.34009		0.355	0.00113		0.355	0.00306
0.61789	0.23615		0.64438	0.22735		0.35581	0.00113		0.35581	0.00306
0.61898	0.49154		0.62963	0.32357		0.3568	0.00113		0.3568	0.00306
0.643	0.35851		0.56143	1.17492		0.35779	0.00113		0.35779	0.00306
0.59266	0.31864		0.54176	0.25944		0.35878	0.00113		0.35878	0.00306
0.65626	0.74787		0.64839	0.20836		0.35977	0.00113		0.35977	0.00306
0.64034	0.20845		0.68583	0.20221		0.36077	0.00113		0.36077	0.00306
0.66141	0.27953		0.67183	0.25595		0.36176	0.00113		0.36176	0.00306
0.64931	0.34142		0.64934	0.28307		0.36275	0.00113		0.36275	0.00306
0.6483	0.61126		0.64237	0.43393		0.36374	0.00113		0.36374	0.00306
0.61487	1.72419		0.66548	0.50249		0.36473	0.00113		0.36473	0.00306
0.65133	0.46493		0.63793	0.24482		0.365	0.00113		0.365	0.00306
0.60676	0.68324		0.66315	0.32738		0.36572	0.00113		0.36572	0.00306
0.62646	0.40685		0.38466	0.32932		0.36671	0.00113		0.36671	0.00306
0.64391	0.41944		0.63934	0.20735		0.3677	0.00113		0.3677	0.00306
0.64745	1.43596		0.64128	0.26171		0.36869	0.00113		0.36869	0.00306
0.63024	0.56081		0.69067	0.25199		0.36968	0.00113		0.36968	0.00306
0.66718	0.27501		0.23428	0.57958		0.37068	0.00113		0.37068	0.00306
0.64225	1.6873		0.65507	0.46399		0.37167	0.00113		0.37167	0.00306
0.65184	0.43455		0.6438	0.48536		0.37266	0.00113		0.37266	0.00306
0.65113	0.45235		0.64763	0.21854		0.37365	0.00113		0.37365	0.00306
0.64901	0.28764		0.80395	0.20874		0.37464	0.00113		0.37464	0.00306
0.64366	0.73588		0.64484	0.2627		0.375	0.00113		0.375	0.00306
0.64406	1.07061		0.68673	0.48293		0.37563	0.00113		0.37563	0.00306
0.63661	0.51626		0.63997	0.32443		0.37662	0.00113		0.37662	0.00306
0.64934	0.52748		0.63799	0.75989		0.37761	0.00113		0.37761	0.00306
0.63852	0.59627		0.64415	0.49296		0.3786	0.00113		0.3786	0.00306
0.66702	0.25467		0.63076	0.31503		0.37959	0.00113		0.37959	0.00306
0.64397	0.451		0.62246	0.44292		0.38059	0.00113		0.38059	0.00306
0.63797	0.75576		0.63414	0.28957		0.38158	0.00113		0.38158	0.00306
0.64763	0.33916		0.65869	0.35537		0.38257	0.00113		0.38257	0.00306
0.65627	0.35532		0.60588	0.21418		0.38356	0.00113		0.38356	0.00306
0.64407	0.392		0.66754	0.27829		0.38455	0.00113		0.38455	0.00306
0.61295	0.32498		0.30982	0.40153		0.385	0.00113		0.385	0.00306
0.63926	0.29774		0.59498	0.23809		0.38554	0.00113		0.38554	0.00306
0.65626	0.26795		0.27987	0.28629		0.38653	0.00113		0.38653	0.00306
0.67169	0.36371		0.64151	0.28404		0.38752	0.00113		0.38752	0.00306
0.648	0.52541		0.26276	0.31259		0.38851	0.00113		0.38851	0.00306
0.64794	0.49928		0.73238	0.76319		0.3895	0.00113		0.3895	0.00306
0.64797	0.21665		0.66279	0.22463		0.3905	0.00113		0.3905	0.00306
0.66009	0.21382		0.64619	0.32665		0.39149	0.00113		0.39149	0.00306
0.64192	0.88435		0.62456	0.2679		0.39248	0.00113		0.39248	0.00306
0.62977	0.43059		0.6627	0.30174		0.39347	0.00113		0.39347	0.00306
0.64185	0.2124		0.657	0.30778		0.39446	0.00113		0.39446	0.00306
0.70323	0.22357		0.61075	0.2199		0.395	0.00113		0.395	0.00306
0.62588	0.20106		0.63956	0.25222		0.39545	0.00113		0.39545	0.00306
0.66076	0.33082		0.64071	0.24243		0.39644	0.00113		0.39644	0.00306
0.65358	0.28596		0.64048	0.42829		0.39743	0.00113		0.39743	0.00306
0.6384	0.62891		0.64278	0.29576		0.39842	0.00113		0.39842	0.00306
0.65661	0.52305		0.41591	0.45073		0.39941	0.00113		0.39941	0.00306
0.63758	0.37979		0.63565	0.40876		0.40041	0.00113		0.40041	0.00306
0.64128	0.67913		0.66875	0.20507		0.4014	0.00113		0.4014	0.00306
0.6521	0.46795		0.65255	0.24748		0.40239	0.00113		0.40239	0.00306
0.60338	0.47557		0.65482	0.44044		0.40338	0.00113		0.40338	0.00306
0.63978	0.38645		0.6594	0.4666		0.40437	0.00113		0.40437	0.00306
0.6387	0.9764		0.45468	0.35507		0.405	0.00113		0.405	0.00306
0.65573	0.373		0.6419	0.29248		0.40536	0.00113		0.40536	0.00306
0.64997	0.54382		0.65639	0.24634		0.40635	0.00113		0.40635	0.00306
0.63761	0.49628		0.64757	0.28035		0.40734	0.00113		0.40734	0.00306
0.67529	0.27087		0.61369	0.54832		0.40833	0.00113		0.40833	0.00306
0.63914	0.32824		0.661	0.24729		0.40932	0.00113		0.40932	0.00306
0.63269	0.47227		0.672	0.53072		0.41032	0.00113		0.41032	0.00306
0.64843	0.20059		0.55617	0.22965		0.41131	0.00113		0.41131	0.00306
0.66355	0.26751		0.63325	0.30418		0.4123	0.00113		0.4123	0.00306
0.63979	0.47503		0.62548	0.24357		0.41329	0.00113		0.41329	0.00306
0.63714	0.25936		0.64524	0.38242		0.41428	0.00113		0.41428	0.00306
0.64029	0.46329		0.66936	0.30465		0.415	0.00113		0.415	0.00306
0.64709	0.26761		0.63189	0.32415		0.41527	0.00113		0.41527	0.00306
0.64835	0.33535		0.66396	0.21577		0.41626	0.00113		0.41626	0.00306
0.62806	0.4159		0.64851	0.52662		0.41725	0.00113		0.41725	0.00306
0.53721	0.24625		0.63369	0.6317		0.41824	0.00113		0.41824	0.00306
0.65274	0.56894		0.60211	0.21187		0.41923	0.00113		0.41923	0.00306
0.63112	0.34058		0.64343	0.40738		0.42023	0.00113		0.42023	0.00306
0.63842	0.87535		0.63917	0.37799		0.42122	0.00113		0.42122	0.00306
0.63894	0.2508		0.56878	0.26794		0.42221	0.00113		0.42221	0.00306
0.6486	0.38475		0.64016	0.24382		0.4232	0.00113		0.4232	0.00306
0.62536	0.55613		0.65545	0.39958		0.42419	0.00113		0.42419	0.00306
0.65538	0.34438		0.64696	0.24878		0.425	0.00113		0.425	0.00306
0.64348	0.55462		0.65663	0.36747		0.42518	0.00113		0.42518	0.00306
0.63839	1.35811		0.65347	0.21557		0.42617	0.00113		0.42617	0.00306
0.64818	0.24105		0.66421	0.29807		0.42716	0.00113		0.42716	0.00306
0.63318	0.27754		0.88544	0.27178		0.42815	0.00113		0.42815	0.00306
0.61879	0.21998		0.64758	0.31846		0.42914	0.00113		0.42914	0.00306
0.63648	0.56072		0.48613	0.20302		0.43014	0.00113		0.43014	0.00306
0.64603	0.24824		0.64909	0.30204		0.43113	0.00113		0.43113	0.00306
0.60763	0.20573		0.72538	0.79118		0.43212	0.00113		0.43212	0.00306
0.63695	0.51483		0.52545	0.2416		0.43311	0.00113		0.43311	0.00306
0.64661	0.40707		0.71395	0.23993		0.4341	0.00113		0.4341	0.00306
0.66138	0.2504		0.4557	0.35134		0.435	0.00113		0.435	0.00306
0.65641	0.2067		0.63577	0.32111		0.43509	0.00113		0.43509	0.00306
0.64225	0.32434		0.64634	0.49491		0.43608	0.00113		0.43608	0.00306
0.65614	0.4249		0.64879	0.27144		0.43707	0.00113		0.43707	0.00306
0.63858	0.40785		0.62821	0.3047		0.43806	0.00113		0.43806	0.00306
0.58481	0.70337		0.63165	0.30482		0.43905	0.00113		0.43905	0.00306
0.64937	0.44866		0.63775	0.29387		0.44005	0.00113		0.44005	0.00306
0.63159	0.74062		0.63573	0.24388		0.44104	0.00113		0.44104	0.00306
0.66011	0.46007		0.67167	0.22737		0.44203	0.00113		0.44203	0.00306
0.6076	0.21109		0.64411	0.6256		0.44302	0.00113		0.44302	0.00306
0.64781	0.83158		0.64987	0.25653		0.44401	0.00113		0.44401	0.00306
0.61436	0.7678		0.64248	0.51784		0.445	0.00113		0.445	0.00306
0.65093	0.62697		0.65472	0.26832		0.445	0.00113		0.445	0.00306
0.637	0.77704		0.32193	0.40667		0.44599	0.00113		0.44599	0.00306
0.63016	0.7547		0.62084	0.31076		0.44698	0.00113		0.44698	0.00306
0.6336	0.43177		0.62114	0.33562		0.44797	0.00113		0.44797	0.00306
0.64314	0.26043		0.62128	0.38851		0.44896	0.00113		0.44896	0.00306
0.67524	0.39924		0.64288	0.25581		0.44995	0.00113		0.44995	0.00306
0.66332	0.39535		0.63483	0.33121		0.45095	0.00113		0.45095	0.00306
0.65474	0.31031		0.64373	0.4626		0.45194	0.00113		0.45194	0.00306
0.63209	0.57084		0.64913	0.27808		0.45293	0.00113		0.45293	0.00306
0.6357	0.86655		0.27706	1.41708		0.45392	0.00113		0.45392	0.00306
0.64997	0.40551		0.65448	0.3421		0.45491	0.00113		0.45491	0.00306
0.62803	0.59515		0.64836	0.23087		0.455	0.00113		0.455	0.00306
0.64045	1.07164		0.62406	0.29481		0.4559	0.00113		0.4559	0.00306
0.64602	1.03129		0.70371	0.22045		0.45689	0.00113		0.45689	0.00306
0.63643	0.33926		0.6614	0.2908		0.45788	0.00113		0.45788	0.00306
0.62917	0.24013		0.64832	0.31307		0.45887	0.00113		0.45887	0.00306
0.65363	0.23114		0.26444	1.09175		0.45986	0.00113		0.45986	0.00306
0.63672	1.09925		0.69985	0.20666		0.46086	0.00113		0.46086	0.00306
0.60604	0.38986		0.65308	0.22384		0.46185	0.00113		0.46185	0.00306
0.65398	0.28565		0.65065	0.20494		0.46284	0.00113		0.46284	0.00306
0.6433	0.39238		0.64087	0.27497		0.46383	0.00113		0.46383	0.00306
0.63297	0.60466		0.88837	0.31123		0.46482	0.00113		0.46482	0.00306
0.6492	0.31375		0.61424	0.40734		0.465	0.00113		0.465	0.00306
0.64871	0.37272		0.6349	0.21188		0.46581	0.00113		0.46581	0.00306
0.63799	0.25879		0.67519	0.21583		0.4668	0.00113		0.4668	0.00306
0.6489	0.23136		0.63945	0.31016		0.46779	0.00113		0.46779	0.00306
0.64272	0.59812		0.63559	0.244		0.46878	0.00113		0.46878	0.00306
0.63075	0.38325		0.66383	0.35647		0.46977	0.00113		0.46977	0.00306
0.60815	0.44676		0.65539	0.24303		0.47077	0.00113		0.47077	0.00306
0.64218	0.31026		0.6697	0.30284		0.47176	0.00113		0.47176	0.00306
0.61208	0.24335		0.61471	0.37477		0.47275	0.00113		0.47275	0.00306
0.65683	0.44382		0.66451	0.26429		0.47374	0.00113		0.47374	0.00306
0.637	2.32297		0.64211	0.47193		0.47473	0.00113		0.47473	0.00306
0.6451	0.46464		0.62928	0.30073		0.475	0.00113		0.475	0.00306
0.63852	0.42681		0.65108	0.26003		0.47572	0.00113		0.47572	0.00306
0.64228	0.479		0.65806	0.40133		0.47671	0.00113		0.47671	0.00306
0.64566	0.22041		0.36414	0.27686		0.4777	0.00113		0.4777	0.00306
0.63981	0.63897		0.63742	0.96639		0.47869	0.00113		0.47869	0.00306
0.66314	0.28969		0.61772	0.21663		0.47968	0.00113		0.47968	0.00306
0.64992	0.47217		0.62684	0.20941		0.48068	0.00113		0.48068	0.00306
0.6276	0.24828		0.62343	0.22487		0.48167	0.00113		0.48167	0.00306
0.63149	0.71923		0.65348	0.40731		0.48266	0.00113		0.48266	0.00306
0.67899	0.98447		0.66723	0.25935		0.48365	0.00113		0.48365	0.00306
0.61779	0.24675		0.64018	0.41864		0.48464	0.00113		0.48464	0.00306
0.62865	0.3726		0.63739	0.22475		0.485	0.00113		0.485	0.00306
0.63988	0.37758		0.64974	0.27745		0.48563	0.00113		0.48563	0.00306
0.64832	0.3724		0.61075	0.26211		0.48662	0.00113		0.48662	0.00306
0.65686	0.29556		0.6288	0.37447		0.48761	0.00113		0.48761	0.00306
0.64098	1.05384		0.64858	0.43145		0.4886	0.00113		0.4886	0.00306
0.64503	0.97123		0.53786	0.44302		0.48959	0.00113		0.48959	0.00306
0.64654	1.04532		0.65024	0.5193		0.49059	0.00113		0.49059	0.00306
0.64516	0.46355		0.49664	0.20147		0.49158	0.00113		0.49158	0.00306
0.65767	0.62701		0.67275	0.33533		0.49257	0.00113		0.49257	0.00306
0.64212	0.59487		0.63888	0.28541		0.49356	0.00113		0.49356	0.00306
0.61139	0.85323		0.64262	0.74102		0.49455	0.00113		0.49455	0.00306
0.65399	0.78472		0.67276	0.37051		0.495	0.00113		0.495	0.00306
0.65333	0.45888		0.6337	0.57245		0.49554	0.00113		0.49554	0.00306
0.64301	0.55166		0.5871	0.28209		0.49653	0.00113		0.49653	0.00306
0.64494	1.40703		0.64847	0.21464		0.49752	0.00113		0.49752	0.00306
0.68028	0.20102		0.64408	0.40779		0.49851	0.00113		0.49851	0.00306
0.61363	0.25513		0.65401	0.34781		0.4995	0.00113		0.4995	0.00306
0.63798	0.77536		0.63042	0.62094		0.5005	0.00113		0.5005	0.00306
0.63642	0.77543		0.68281	0.33997		0.50149	0.00113		0.50149	0.00306
0.63232	0.47823		0.663	0.25628		0.50248	0.00113		0.50248	0.00306
0.62902	0.4162		0.6093	0.20465		0.50347	0.00113		0.50347	0.00306
0.64638	0.20308		0.61369	0.25531		0.50446	0.00113		0.50446	0.00306
0.63951	0.53444		0.51052	0.55179		0.505	0.00113		0.505	0.00306
0.64324	0.59175		0.63449	0.43865		0.50545	0.00113		0.50545	0.00306
0.62029	0.25999		0.64598	0.50713		0.50644	0.00113		0.50644	0.00306
0.64093	0.34653		0.66354	0.28379		0.50743	0.00113		0.50743	0.00306
0.65569	0.71834		0.67309	0.21		0.50842	0.00113		0.50842	0.00306
0.61244	0.38449		0.62465	0.33472		0.50941	0.00113		0.50941	0.00306
0.62718	0.37182		0.94236	0.21628		0.51041	0.00113		0.51041	0.00306
0.6271	0.27775		0.6424	0.22248		0.5114	0.00113		0.5114	0.00306
0.60883	0.75833		0.64005	0.34839		0.51239	0.00113		0.51239	0.00306
0.64856	0.40284		0.64116	0.39912		0.51338	0.00113		0.51338	0.00306
0.59743	1.3293		0.62982	0.27589		0.51437	0.00113		0.51437	0.00306
0.65873	0.40807		0.65928	0.45296		0.515	0.00113		0.515	0.00306
0.6509	0.55163		0.66006	0.36899		0.51536	0.00113		0.51536	0.00306
0.62918	0.45738		0.63946	0.34306		0.51635	0.00113		0.51635	0.00306
0.65243	0.22317		0.57235	2.0216		0.51734	0.00113		0.51734	0.00306
0.65035	0.43525		0.6455	0.48363		0.51833	0.00113		0.51833	0.00306
0.6132	0.48802		0.654	0.24581		0.51932	0.00113		0.51932	0.00306
0.64244	0.35561		0.66922	0.25476		0.52032	0.00113		0.52032	0.00306
0.66211	0.64012		0.49136	0.67124		0.52131	0.00113		0.52131	0.00306
0.6674	0.2141		0.6349	0.24		0.5223	0.00113		0.5223	0.00306
0.64849	0.63198		0.64592	0.36942		0.52329	0.00113		0.52329	0.00306
0.5737	0.50879		0.66324	0.22796		0.52428	0.00113		0.52428	0.00306
0.64972	0.45188		0.64176	0.25447		0.525	0.00113		0.525	0.00306
0.6361	0.72579		0.66998	0.21481		0.52527	0.00113		0.52527	0.00306
0.63957	0.48092		0.65481	0.33488		0.52626	0.00113		0.52626	0.00306
0.64755	0.52843		0.62802	0.2611		0.52725	0.00113		0.52725	0.00306
0.64509	0.82546		0.55455	0.31576		0.52824	0.00113		0.52824	0.00306
0.63477	0.43067		0.6942	0.244		0.52923	0.00113		0.52923	0.00306
0.61875	0.22806		0.6358	0.31286		0.53023	0.00113		0.53023	0.00306
0.64312	0.57136		0.64005	0.21718		0.53122	0.00113		0.53122	0.00306
0.6453	0.55301		0.54213	0.28405		0.53221	0.00113		0.53221	0.00306
0.60152	0.20442		0.6453	0.25075		0.5332	0.00113		0.5332	0.00306
0.64528	0.40396		0.61465	0.45066		0.53419	0.00113		0.53419	0.00306
0.62818	0.46984		0.62473	0.26867		0.535	0.00113		0.535	0.00306
0.63803	0.83178		0.71072	0.29455		0.53518	0.00113		0.53518	0.00306
0.62443	0.55256		0.63413	0.21222		0.53617	0.00113		0.53617	0.00306
0.66675	0.44092		0.61943	0.21227		0.53716	0.00113		0.53716	0.00306
0.6386	0.20411		0.63043	0.43109		0.53815	0.00113		0.53815	0.00306
0.63231	0.57651		0.61989	0.20035		0.53914	0.00113		0.53914	0.00306
0.6107	0.60092		0.65342	0.23231		0.54014	0.00113		0.54014	0.00306
0.63849	0.82003		0.69146	0.22763		0.54113	0.00113		0.54113	0.00306
0.6465	1.03859		0.65498	0.27219		0.54212	0.00113		0.54212	0.00306
0.64581	0.49186		0.69004	0.28024		0.54311	0.00113		0.54311	0.00306
0.63717	0.49614		0.61463	0.23535		0.5441	0.00113		0.5441	0.00306
0.63963	0.63863		0.64418	0.29202		0.545	0.00113		0.545	0.00306
0.64258	0.42175		0.64099	0.48306		0.54509	0.00113		0.54509	0.00306
0.6616	0.28707		0.64352	0.27541		0.54608	0.00113		0.54608	0.00306
0.65739	0.27926		0.64345	0.25447		0.54707	0.00113		0.54707	0.00306
0.65945	0.29232		0.63377	0.51204		0.54806	0.00113		0.54806	0.00306
0.65417	0.23431		0.64326	0.33822		0.54905	0.00113		0.54905	0.00306
0.61033	0.61306		0.63905	0.56391		0.55005	0.00113		0.55005	0.00306
0.64242	0.50781		0.64241	0.46216		0.55104	0.00113		0.55104	0.00306
0.66357	0.49639		0.63704	0.44652		0.55203	0.00113		0.55203	0.00306
0.66501	0.45035		0.49925	0.36095		0.55302	0.00113		0.55302	0.00306
0.61425	0.93023		0.63895	0.31187		0.55401	0.00113		0.55401	0.00306
0.64372	0.25023		0.67705	0.20616		0.555	0.00113		0.555	0.00306
0.65334	0.44279		0.65221	0.59405		0.55599	0.00113		0.55599	0.00306
0.62583	0.73259		0.64061	0.32486		0.55698	0.00113		0.55698	0.00306
0.64369	0.61809		0.63823	0.22832		0.55797	0.00113		0.55797	0.00306
0.64482	0.63132		0.63941	0.37505		0.55896	0.00113		0.55896	0.00306
0.62893	1.3117		0.63619	0.33813		0.55995	0.00113		0.55995	0.00306
0.6045	0.24239		0.62727	0.24316		0.56095	0.00113		0.56095	0.00306
0.56049	0.70097		0.65065	0.28883		0.56194	0.00113		0.56194	0.00306
0.6209	0.41626		0.65059	0.22751		0.56293	0.00113		0.56293	0.00306
0.62458	0.55195		0.65902	0.20014		0.56392	0.00113		0.56392	0.00306
0.64743	0.91501		0.26535	0.46853		0.56491	0.00113		0.56491	0.00306
0.65632	0.32199		0.62405	0.22213		0.565	0.00113		0.565	0.00306
0.59565	0.27005		0.59322	0.27484		0.5659	0.00113		0.5659	0.00306
0.64144	0.6394		0.65925	0.20664		0.56689	0.00113		0.56689	0.00306
0.613	0.25601		0.664	0.3087		0.56788	0.00113		0.56788	0.00307
0.63075	0.34239		0.64769	0.35432		0.56887	0.00113		0.56887	0.00307
0.59915	0.6914		0.65448	0.37894		0.56986	0.00113		0.56986	0.00307
0.62835	0.48057		0.66473	0.30611		0.57086	0.00113		0.57086	0.00307
0.64541	0.44166		0.50806	0.32626		0.57185	0.00113		0.57185	0.00307
0.62906	0.21966		0.57833	0.25464		0.57284	0.00113		0.57284	0.00307
0.65943	0.27946		0.61784	0.21599		0.57383	0.00113		0.57383	0.00307
0.64041	0.4127		0.64144	0.4169		0.57482	0.00113		0.57482	0.00307
0.66363	0.36689		0.49168	0.21323		0.575	0.00113		0.575	0.00307
0.65402	0.34149		0.66076	0.31483		0.57581	0.00113		0.57581	0.00308
0.6162	0.29223		0.65092	0.42706		0.5768	0.00113		0.5768	0.00308
0.64396	1.45919		0.62963	0.38844		0.57779	0.00113		0.57779	0.00309
0.64461	0.40313		0.67127	0.27194		0.57878	0.00113		0.57878	0.00309
0.64282	0.98515		0.64784	0.33136		0.57977	0.00113		0.57977	0.0031
0.63488	0.3947		0.64326	0.21512		0.58077	0.00113		0.58077	0.00311
0.63649	0.21181		0.64262	0.32326		0.58176	0.00113		0.58176	0.00313
0.65514	0.33218		0.63686	0.25889		0.58275	0.00113		0.58275	0.00315
0.65395	0.57874		0.62107	0.35392		0.58374	0.00113		0.58374	0.00317
0.65546	0.30485		0.64182	0.75117		0.58473	0.00114		0.58473	0.00319
0.62155	0.20815		0.63718	0.2208		0.585	0.00114		0.585	0.0032
0.63683	0.32882		0.63782	0.2235		0.58572	0.00114		0.58572	0.00323
0.66251	0.22346		0.63695	0.4		0.58671	0.00114		0.58671	0.00327
0.61617	0.58001		0.64935	0.30706		0.5877	0.00114		0.5877	0.00332
0.62663	0.80537		0.62652	0.36373		0.58869	0.00114		0.58869	0.00339
0.63101	0.53708		0.64364	0.23974		0.58968	0.00115		0.58968	0.00347
0.65273	0.34678		0.63439	0.22255		0.59068	0.00115		0.59068	0.00356
0.65848	0.32721		0.43649	0.22472		0.59167	0.00116		0.59167	0.00368
0.61686	0.79197		0.85666	0.31847		0.59266	0.00117		0.59266	0.00382
0.59465	0.37079		0.69991	0.4686		0.59365	0.00119		0.59365	0.00399
0.64565	0.24468		0.65838	0.23003		0.59464	0.00121		0.59464	0.00419
0.62262	1.0561		0.65073	0.37002		0.595	0.00122		0.595	0.00427
0.63877	0.42816		0.63641	0.33453		0.59563	0.00124		0.59563	0.00443
0.64879	0.65658		0.6128	1.20831		0.59662	0.00128		0.59662	0.00472
0.62528	0.7405		0.29355	0.43926		0.59761	0.00134		0.59761	0.00506
0.64343	0.41436		0.65398	0.31051		0.5986	0.00141		0.5986	0.00546
0.64457	0.40803		0.60036	0.22558		0.59959	0.00151		0.59959	0.00592
0.65635	0.21981		0.64177	0.64785		0.60059	0.00163		0.60059	0.00647
0.651	0.20741		0.62992	0.25991		0.60158	0.00179		0.60158	0.00711
0.65475	0.30815		0.58559	0.24299		0.60257	0.002		0.60257	0.00784
0.64239	0.28338		0.64683	0.43674		0.60356	0.00227		0.60356	0.00869
0.65063	0.27934		0.67884	0.22855		0.60455	0.00261		0.60455	0.00967
0.63142	0.8278		0.64928	0.61627		0.605	0.00279		0.605	0.01015
0.63091	0.23919		0.65885	0.23048		0.60554	0.00304		0.60554	0.01078
0.64409	0.43837		0.61658	0.41355		0.60653	0.00358		0.60653	0.01205
0.6567	0.6716		0.65183	0.34601		0.60752	0.00426		0.60752	0.01348
0.65844	0.23907		0.62931	0.49175		0.60851	0.00509		0.60851	0.0151
0.64247	0.91556		0.6421	0.31172		0.6095	0.00612		0.6095	0.01692
0.64572	0.68804		0.63329	0.5402		0.6105	0.00737		0.6105	0.01895
0.64716	0.30145		0.66917	0.22726		0.61149	0.00889		0.61149	0.02121
0.63802	0.32929		0.64844	0.21874		0.61248	0.01071		0.61248	0.02371
0.6737	0.24643		0.66101	0.20398		0.61347	0.01289		0.61347	0.02646
0.64825	0.294		0.68597	0.25346		0.61446	0.01548		0.61446	0.02949
0.61722	0.38601		0.61671	0.29735		0.615	0.01707		0.615	0.03125
0.65911	0.21437		0.64478	0.37661		0.61545	0.01851		0.61545	0.03279
0.63134	0.36381		0.18605	1.24802		0.61644	0.02206		0.61644	0.03637
0.6363	0.45959		0.53459	0.61918		0.61743	0.02617		0.61743	0.04025
0.64401	0.21274		0.63747	0.3252		0.61842	0.0309		0.61842	0.04442
0.63809	0.29588		0.63535	0.37286		0.61941	0.0363		0.61941	0.04888
0.66166	0.26357		0.6511	0.38032		0.62041	0.04241		0.62041	0.05363
0.64192	0.35435		0.62291	0.25208		0.6214	0.04928		0.6214	0.05866
0.62301	0.38696		0.61923	0.28416		0.62239	0.05693		0.62239	0.06396
0.62473	0.25983		0.6485	0.44673		0.62338	0.06539		0.62338	0.0695
0.6265	1.71514		0.64348	0.32702		0.62437	0.07465		0.62437	0.07528
0.64478	1.45598		0.6543	0.38717		0.625	0.08097		0.625	0.07907
0.66362	0.21041		0.64956	0.32752		0.62536	0.08472		0.62536	0.08126
0.65718	0.40304		0.65018	0.77532		0.62635	0.09556		0.62635	0.08742
0.65052	0.4929		0.63866	0.68124		0.62734	0.10713		0.62734	0.09371
0.65933	0.29846		0.61494	0.24476		0.62833	0.11936		0.62833	0.1001
0.64946	0.69043		0.666	0.21945		0.62932	0.13216		0.62932	0.10655
0.63591	1.13138		0.64935	0.30584		0.63032	0.14543		0.63032	0.113
0.65755	0.39227		0.65415	0.53906		0.63131	0.15902		0.63131	0.11941
0.65524	0.29848		0.29111	0.22256		0.6323	0.1728		0.6323	0.12573
0.64565	0.76744		0.6685	0.23078		0.63329	0.18659		0.63329	0.1319
0.65589	0.46787		0.63772	0.28783		0.63428	0.20022		0.63428	0.13786
0.6434	0.33787		0.6659	0.23115		0.635	0.20992		0.635	0.14204
0.65256	0.65979		0.65372	0.20422		0.63527	0.21349		0.63527	0.14357
0.63258	0.24001		0.65469	0.26882		0.63626	0.2262		0.63626	0.14895
0.6393	0.41088		0.64691	0.22006		0.63725	0.23816		0.63725	0.15397
0.66144	0.37582		0.65639	0.36797		0.63824	0.24916		0.63824	0.15856
0.64554	0.43362		0.64324	0.24086		0.63923	0.25903		0.63923	0.16269
0.64748	0.48345		0.6605	0.21503		0.64023	0.26758		0.64023	0.1663
0.66955	0.27281		0.62773	0.287		0.64122	0.27466		0.64122	0.16935
0.63129	0.43024		0.65607	0.40925		0.64221	0.28015		0.64221	0.17182
0.64716	0.7481		0.64082	0.53424		0.6432	0.28393		0.6432	0.17368
0.64248	0.42798		0.64994	0.33158		0.64419	0.28595		0.64419	0.17489
0.64818	0.68395		0.66516	0.29192		0.645	0.28625		0.645	0.17541
0.65593	0.57262		0.99626	0.22		0.64518	0.28615		0.64518	0.17546
0.64195	0.25612		0.64051	0.20389		0.64617	0.28454		0.64617	0.17537
0.5939	0.32297		0.66529	0.25519		0.64716	0.28114		0.64716	0.17463
0.63697	0.89548		0.63635	0.22276		0.64815	0.27603		0.64815	0.17324
0.64566	0.38009		0.58108	0.30694		0.64914	0.26929		0.64914	0.17121
0.7145	0.3328		0.25404	0.22068		0.65014	0.26106		0.65014	0.16858
0.64585	0.24791		0.56575	0.27115		0.65113	0.25147		0.65113	0.16537
0.63588	0.6174		0.64729	0.50451		0.65212	0.24071		0.65212	0.16162
0.65321	0.4787		0.64018	0.4302		0.65311	0.22895		0.65311	0.15736
0.6426	0.59729		0.50449	1.0639		0.6541	0.21638		0.6541	0.15265
0.6647	0.34775		0.64542	0.43491		0.655	0.20444		0.655	0.14801
0.61697	0.27225		0.65749	0.36115		0.65509	0.20322		0.65509	0.14753
0.65837	0.46377		0.65995	0.21079		0.65608	0.18966		0.65608	0.14205
0.64501	0.55331		0.67319	0.25334		0.65707	0.17588		0.65707	0.13627
0.62633	0.41588		0.63448	0.40292		0.65806	0.16209		0.65806	0.13025
0.63824	0.82452		0.65321	0.27131		0.65905	0.14844		0.65905	0.12403
0.65025	0.24803		0.63578	0.36806		0.66005	0.13509		0.66005	0.11768
0.61981	0.74427		0.63885	0.281		0.66104	0.12217		0.66104	0.11125
0.65027	0.20639		0.52976	0.21446		0.66203	0.10981		0.66203	0.1048
0.66529	0.30272		0.63445	0.24362		0.66302	0.09808		0.66302	0.09836
0.59926	0.75069		0.65267	0.35359		0.66401	0.08707		0.66401	0.09199
0.65059	0.24802		0.6632	0.46783		0.665	0.07683		0.665	0.08573
0.65229	0.30705		0.64165	0.3097		0.66599	0.06738		0.66599	0.07962
0.63578	0.23667		0.63056	0.25909		0.66698	0.05875		0.66698	0.07369
0.63472	0.33837		0.65581	0.36757		0.66797	0.05092		0.66797	0.06798
0.64718	0.75092		0.66847	0.2003		0.66896	0.04388		0.66896	0.06249
0.68674	0.21659		0.65702	0.23184		0.66995	0.0376		0.66995	0.05727
0.64307	0.69212		0.67263	0.21198		0.67095	0.03205		0.67095	0.05231
0.71371	0.26986		0.6535	0.35984		0.67194	0.02717		0.67194	0.04764
0.67082	0.21533		0.659	0.42748		0.67293	0.02293		0.67293	0.04326
0.66066	0.30795		0.62235	0.27606		0.67392	0.01926		0.67392	0.03917
0.63469	0.36308		0.62264	0.23631		0.67491	0.01611		0.67491	0.03537
0.66074	0.25053		0.62901	0.36927		0.675	0.01585		0.675	0.03504
0.62583	0.2583		0.64875	0.24674		0.6759	0.01343		0.6759	0.03186
0.64214	0.53548		0.62865	0.33575		0.67689	0.01117		0.67689	0.02864
0.63215	0.60534		0.5928	0.4045		0.67788	0.00927		0.67788	0.02569
0.61857	0.77579		0.65448	0.20701		0.67887	0.00769		0.67887	0.023
0.63294	0.87202		0.65838	0.25084		0.67986	0.00638		0.67986	0.02057
0.65286	0.48426		0.63602	0.47539		0.68086	0.0053		0.68086	0.01837
0.63754	0.965		0.42273	0.40802		0.68185	0.00443		0.68185	0.0164
0.64444	0.60973		0.67917	0.2047		0.68284	0.00372		0.68284	0.01464
0.65677	0.25337		0.66186	0.36491		0.68383	0.00315		0.68383	0.01307
0.63995	0.62637		0.64327	0.31948		0.68482	0.0027		0.68482	0.01169
0.60204	0.38461		0.62576	0.51987		0.685	0.00263		0.685	0.01145
0.65923	0.49037		0.55309	0.30764		0.68581	0.00234		0.68581	0.01046
0.64199	1.73367		0.65027	0.20394		0.6868	0.00206		0.6868	0.00939
0.63295	0.7225		0.65379	0.20205		0.68779	0.00184		0.68779	0.00845
0.65338	1.06513		0.65099	0.33263		0.68878	0.00166		0.68878	0.00763
0.63852	1.07968		0.66987	0.2358		0.68977	0.00153		0.68977	0.00692
0.63421	0.22382		0.65536	0.30188		0.69077	0.00143		0.69077	0.00631
0.65143	0.43918		0.6553	0.29727		0.69176	0.00135		0.69176	0.00579
0.63353	0.27075		0.54652	1.23996		0.69275	0.0013		0.69275	0.00534
0.65716	1.27998		0.66049	0.20244		0.69374	0.00125		0.69374	0.00496
0.66423	0.35418		0.64271	0.42005		0.69473	0.00122		0.69473	0.00464
0.6466	0.42681		0.66634	0.26717		0.695	0.00121		0.695	0.00456
0.63427	0.25699		0.65338	0.61919		0.69572	0.0012		0.69572	0.00436
0.59997	0.63054		0.63592	0.227		0.69671	0.00118		0.69671	0.00413
0.66473	0.22369		0.65081	0.32774		0.6977	0.00116		0.6977	0.00394
0.61008	0.26486		0.78989	0.24766		0.69869	0.00116		0.69869	0.00378
0.63817	0.59053		0.64465	0.22769		0.69968	0.00115		0.69968	0.00365
0.62277	0.2232		0.65586	0.30398		0.70068	0.00114		0.70068	0.00354
0.62834	0.56713		0.66048	0.20391		0.70167	0.00114		0.70167	0.00344
0.59442	1.61615		0.65264	0.25878		0.70266	0.00114		0.70266	0.00337
0.63266	0.7069		0.39698	0.21446		0.70365	0.00114		0.70365	0.00331
0.64917	0.80434		0.34618	0.2552		0.70464	0.00114		0.70464	0.00326
0.62992	0.23598		0.69805	0.21248		0.705	0.00113		0.705	0.00324
0.63766	0.20829		0.6294	0.44618		0.70563	0.00113		0.70563	0.00322
0.66175	0.45085		0.64138	0.27623		0.70662	0.00113		0.70662	0.00319
0.64555	0.92036		0.5728	0.2308		0.70761	0.00113		0.70761	0.00316
0.63628	0.40729		0.64356	0.89627		0.7086	0.00113		0.7086	0.00314
0.63302	0.46308		0.64052	0.31959		0.70959	0.00113		0.70959	0.00312
0.6359	0.60251		0.6327	0.24137		0.71059	0.00113		0.71059	0.00311
0.65819	0.98293		0.64121	0.37012		0.71158	0.00113		0.71158	0.0031
0.64508	0.27973		0.65047	0.22038		0.71257	0.00113		0.71257	0.00309
0.66125	0.26332		0.65264	0.23063		0.71356	0.00113		0.71356	0.00309
0.63498	0.45203		0.65072	0.2329		0.71455	0.00113		0.71455	0.00308
0.64817	0.82115		0.65408	0.34431		0.715	0.00113		0.715	0.00308
0.62951	0.29895		0.63457	0.2217		0.71554	0.00113		0.71554	0.00308
0.65091	0.31215		0.61269	0.486		0.71653	0.00113		0.71653	0.00307
0.66398	0.25577		0.64493	0.45368		0.71752	0.00113		0.71752	0.00307
0.63855	0.49984		0.66234	0.23474		0.71851	0.00113		0.71851	0.00307
0.64557	0.48734		0.3066	1.1476		0.7195	0.00113		0.7195	0.00307
0.63575	0.42723		0.62065	0.21812		0.7205	0.00113		0.7205	0.00307
0.65184	1.09936		0.6198	0.31695		0.72149	0.00113		0.72149	0.00307
0.65327	0.21437		0.64568	0.36726		0.72248	0.00113		0.72248	0.00307
0.64865	0.70029		0.66287	0.20238		0.72347	0.00113		0.72347	0.00307
0.63597	0.45853		0.6887	0.24572		0.72446	0.00113		0.72446	0.00306
0.64277	0.2196		0.6509	0.24024		0.725	0.00113		0.725	0.00306
0.59567	0.5555		0.64826	0.35563		0.72545	0.00113		0.72545	0.00306
0.64335	0.21492		0.68936	0.23279		0.72644	0.00113		0.72644	0.00306
0.64105	0.46642		0.64764	0.24336		0.72743	0.00113		0.72743	0.00306
0.65164	0.35881		0.63742	0.2208		0.72842	0.00113		0.72842	0.00306
0.6407	1.04834		0.64663	0.35237		0.72941	0.00113		0.72941	0.00306
0.67038	0.25598		0.67176	0.20808		0.73041	0.00113		0.73041	0.00306
0.64046	0.93615		0.65366	0.23882		0.7314	0.00113		0.7314	0.00306
0.59899	0.48897		0.62671	0.66973		0.73239	0.00113		0.73239	0.00306
0.6816	0.32411		0.65473	0.38312		0.73338	0.00113		0.73338	0.00306
0.61995	0.29303		0.66002	0.24122		0.73437	0.00113		0.73437	0.00306
0.63915	0.82711		0.62424	0.30109		0.735	0.00113		0.735	0.00306
0.63743	0.4067		0.62864	0.26929		0.73536	0.00113		0.73536	0.00306
0.64415	0.33841		0.66567	0.42252		0.73635	0.00113		0.73635	0.00306
0.63953	0.43103		0.63565	0.31096		0.73734	0.00113		0.73734	0.00306
0.64313	1.20901		0.64887	0.3595		0.73833	0.00113		0.73833	0.00306
0.64852	0.31604		0.46992	0.30555		0.73932	0.00113		0.73932	0.00306
0.63942	0.38819		0.65059	0.46163		0.74032	0.00113		0.74032	0.00306
0.64658	0.2266		0.68418	0.21167		0.74131	0.00113		0.74131	0.00306
0.65601	0.3676		0.65094	0.59012		0.7423	0.00113		0.7423	0.00306
0.64661	0.36919		0.75143	0.24886		0.74329	0.00113		0.74329	0.00306
0.60054	0.29862		0.64235	0.21431		0.74428	0.00113		0.74428	0.00306
0.63942	0.44234		0.65357	0.2164		0.745	0.00113		0.745	0.00306
0.64711	0.59153		0.66217	0.2002		0.74527	0.00113		0.74527	0.00306
0.65476	0.24722		0.63398	0.28585		0.74626	0.00113		0.74626	0.00306
0.64622	0.89504		0.6473	0.60124		0.74725	0.00113		0.74725	0.00306
0.61672	0.63885		0.61889	0.34338		0.74824	0.00113		0.74824	0.00306
0.63487	0.47731		0.64143	0.2034		0.74923	0.00113		0.74923	0.00306
0.64404	0.45749		0.67127	0.22688		0.75023	0.00113		0.75023	0.00306
0.64144	0.76373		0.66492	0.24692		0.75122	0.00113		0.75122	0.00306
0.6336	0.38686		0.65737	0.21407		0.75221	0.00113		0.75221	0.00306
0.64936	0.23741		0.6432	0.65484		0.7532	0.00113		0.7532	0.00306
0.65798	0.30444		0.62359	0.3173		0.75419	0.00113		0.75419	0.00306
0.65864	0.68753		0.66145	0.255		0.755	0.00113		0.755	0.00306
0.6368	0.99619		0.62936	0.44181		0.75518	0.00113		0.75518	0.00306
0.65715	0.67043		0.65335	0.36192		0.75617	0.00113		0.75617	0.00306
0.6611	0.32449		0.65211	0.27697		0.75716	0.00113		0.75716	0.00306
0.636	0.66363		0.65028	0.20763		0.75815	0.00113		0.75815	0.00306
0.61629	0.33592		0.56191	0.28747		0.75914	0.00113		0.75914	0.00306
0.63081	0.46974		0.68726	0.2259		0.76014	0.00113		0.76014	0.00306
0.6542	0.26378		0.65488	0.70946		0.76113	0.00113		0.76113	0.00306
0.65902	0.35833		0.67871	0.22626		0.76212	0.00113		0.76212	0.00306
0.6288	0.23183		0.64153	0.55882		0.76311	0.00113		0.76311	0.00306
0.62159	0.23077		0.63062	0.30882		0.7641	0.00113		0.7641	0.00306
0.65626	1.44788		0.58656	0.20624		0.765	0.00113		0.765	0.00306
0.67041	0.3809		0.64632	0.28443		0.76509	0.00113		0.76509	0.00306
0.65837	0.22308		0.63128	0.32184		0.76608	0.00113		0.76608	0.00306
0.64316	0.49998		0.92456	0.23934		0.76707	0.00113		0.76707	0.00306
0.64602	0.25772		0.65921	0.24587		0.76806	0.00113		0.76806	0.00306
0.6598	0.37605		0.63799	0.39551		0.76905	0.00113		0.76905	0.00306
0.6364	0.35763		0.54509	0.36839		0.77005	0.00113		0.77005	0.00306
0.68486	0.24339		0.65588	0.25378		0.77104	0.00113		0.77104	0.00306
0.63153	2.10287		0.91974	0.24986		0.77203	0.00113		0.77203	0.00306
0.64204	2.08044		0.63507	0.28432		0.77302	0.00113		0.77302	0.00306
0.64156	0.23263		0.65055	0.48616		0.77401	0.00113		0.77401	0.00306
0.63968	0.98755		0.61676	0.34055		0.775	0.00113		0.775	0.00306
0.636	0.41786		0.64618	0.33529		0.77599	0.00113		0.77599	0.00306
0.6976	0.22847		0.66133	0.26187		0.77698	0.00113		0.77698	0.00306
0.64919	0.65432		0.67413	0.2141		0.77797	0.00113		0.77797	0.00306
0.66146	0.23923		0.65944	0.26008		0.77896	0.00113		0.77896	0.00306
0.61572	0.5635		0.65527	0.21216		0.77995	0.00113		0.77995	0.00306
0.66335	0.29654		0.64661	0.31004		0.78095	0.00113		0.78095	0.00306
0.64693	0.43458		0.62928	0.92582		0.78194	0.00113		0.78194	0.00306
0.6477	0.42118		0.59314	0.28323		0.78293	0.00113		0.78293	0.00306
0.64998	0.33488		0.64379	0.21999		0.78392	0.00113		0.78392	0.00306
0.65118	0.77191		0.63571	0.21596		0.78491	0.00113		0.78491	0.00306
0.65743	0.46774		0.75741	0.27984		0.785	0.00113		0.785	0.00306
0.64175	0.72825		0.65391	0.31967		0.7859	0.00113		0.7859	0.00306
0.65634	0.83551		0.64892	0.44129		0.78689	0.00113		0.78689	0.00306
0.63055	0.28132		0.70828	0.26263		0.78788	0.00113		0.78788	0.00306
0.63422	0.70844		0.64147	0.50418		0.78887	0.00113		0.78887	0.00306
0.65714	0.97716		0.65473	0.20219		0.78986	0.00113		0.78986	0.00306
0.64541	0.35141		0.73014	0.2244		0.79086	0.00113		0.79086	0.00306
0.67945	0.29121		0.44369	0.30577		0.79185	0.00113		0.79185	0.00306
0.64871	0.76195		0.65087	0.35631		0.79284	0.00113		0.79284	0.00306
0.62776	0.32087		0.65242	0.35603		0.79383	0.00113		0.79383	0.00306
0.64553	0.21948		0.65953	0.23133		0.79482	0.00113		0.79482	0.00306
0.6441	0.36534		0.65552	0.26724		0.795	0.00113		0.795	0.00306
0.65153	0.57832		0.7633	0.51133		0.79581	0.00113		0.79581	0.00306
0.65578	0.6623		0.71029	0.22512		0.7968	0.00113		0.7968	0.00306
0.65408	0.26929		0.63041	0.24434		0.79779	0.00113		0.79779	0.00306
0.63126	0.24764		0.63408	0.51984		0.79878	0.00113		0.79878	0.00306
0.6382	0.37796		0.65844	0.21095		0.79977	0.00113		0.79977	0.00306
0.65203	0.32051		0.70053	0.45548		0.80077	0.00113		0.80077	0.00306
0.6353	0.52816		0.65342	0.52283		0.80176	0.00113		0.80176	0.00306
0.63764	0.78707		0.64313	0.28855		0.80275	0.00113		0.80275	0.00306
0.66607	0.20817		0.73168	0.3084		0.80374	0.00113		0.80374	0.00306
0.65369	0.24835		0.63984	0.28755		0.80473	0.00113		0.80473	0.00306
0.63668	1.11667		0.63549	0.64399		0.805	0.00113		0.805	0.00306
0.64337	0.58671		0.65239	0.71781		0.80572	0.00113		0.80572	0.00306
0.65118	0.38309		0.61046	0.2762		0.80671	0.00113		0.80671	0.00306
0.64307	0.51599		0.6084	0.21548		0.8077	0.00113		0.8077	0.00306
0.62411	0.3695		0.64116	0.43609		0.80869	0.00113		0.80869	0.00306
0.65843	0.22664		0.63992	0.29773		0.80968	0.00113		0.80968	0.00306
0.62457	0.21331		0.64294	0.22356		0.81068	0.00113		0.81068	0.00306
0.64494	0.31916		0.64029	0.20975		0.81167	0.00113		0.81167	0.00306
0.65248	0.47884		0.66132	0.22706		0.81266	0.00113		0.81266	0.00306
0.6517	1.02848		0.65417	0.2586		0.81365	0.00113		0.81365	0.00306
0.65384	0.32881		0.65184	0.38646		0.81464	0.00113		0.81464	0.00306
0.67155	0.25947		0.63876	0.27517		0.815	0.00113		0.815	0.00306
0.66051	0.2067		0.63928	0.47171		0.81563	0.00113		0.81563	0.00306
0.58994	0.60024		0.62956	0.3551		0.81662	0.00113		0.81662	0.00306
0.63891	1.13621		0.64083	0.30848		0.81761	0.00113		0.81761	0.00306
0.64057	0.42725		0.60186	0.27974		0.8186	0.00113		0.8186	0.00306
0.62247	0.24758		0.63508	0.40034		0.81959	0.00113		0.81959	0.00306
0.63537	0.27159		0.64212	0.46414		0.82059	0.00113		0.82059	0.00306
0.64487	1.45919		0.6809	0.2642		0.82158	0.00113		0.82158	0.00306
0.64315	0.21676		0.66345	0.32453		0.82257	0.00113		0.82257	0.00306
0.63818	0.27198		0.6472	0.29719		0.82356	0.00113		0.82356	0.00306
0.62651	0.23737		0.87499	0.22762		0.82455	0.00113		0.82455	0.00306
0.68331	0.2115		0.65403	0.3867		0.825	0.00113		0.825	0.00306
0.64705	0.36852		0.63072	0.20736		0.82554	0.00113		0.82554	0.00306
0.65224	0.48421		0.67639	0.28416		0.82653	0.00113		0.82653	0.00306
0.65176	1.10117		0.66252	0.248		0.82752	0.00113		0.82752	0.00306
0.6321	0.29151		0.65718	0.32774		0.82851	0.00113		0.82851	0.00306
0.62967	0.76366		0.66481	0.20263		0.8295	0.00113		0.8295	0.00306
0.64479	0.33996		0.79508	0.22655		0.8305	0.00113		0.8305	0.00306
0.64629	0.3359		0.56447	0.89057		0.83149	0.00113		0.83149	0.00306
0.65835	0.49532		0.67254	0.25319		0.83248	0.00113		0.83248	0.00306
0.65874	0.41413		0.23588	0.28996		0.83347	0.00113		0.83347	0.00306
0.62659	0.63472		0.64233	0.68899		0.83446	0.00113		0.83446	0.00306
0.62633	0.91767		0.66786	0.2106		0.835	0.00113		0.835	0.00306
0.64115	0.49926		0.62873	0.5035		0.83545	0.00113		0.83545	0.00306
0.6463	0.25177		0.66667	0.21731		0.83644	0.00113		0.83644	0.00306
0.63042	0.40453		0.66655	0.42844		0.83743	0.00113		0.83743	0.00306
0.66474	0.23947		0.74821	0.47937		0.83842	0.00113		0.83842	0.00306
0.65127	0.6197		0.62825	0.22134		0.83941	0.00113		0.83941	0.00306
0.65843	0.28311		0.66788	0.21031		0.84041	0.00113		0.84041	0.00306
0.67876	0.2188		0.63561	0.48831		0.8414	0.00113		0.8414	0.00306
0.6475	0.33962		0.64051	0.28851		0.84239	0.00113		0.84239	0.00306
0.62634	1.93464		0.62688	0.21919		0.84338	0.00113		0.84338	0.00306
0.63814	0.96409		0.68171	0.24619		0.84437	0.00113		0.84437	0.00306
0.63999	1.84702		0.65465	0.32011		0.845	0.00113		0.845	0.00306
0.64677	0.3841		0.62726	0.4359		0.84536	0.00113		0.84536	0.00306
0.66533	0.28343		0.65296	2.47782		0.84635	0.00113		0.84635	0.00306
0.64629	0.88004		0.65282	0.20732		0.84734	0.00113		0.84734	0.00306
0.62206	0.8654		0.64972	0.22821		0.84833	0.00113		0.84833	0.00306
0.63358	0.94168		0.6298	0.29209		0.84932	0.00113		0.84932	0.00306
0.65142	0.33579		0.65344	0.20727		0.85032	0.00113		0.85032	0.00306
0.64259	0.34815		0.67764	0.31382		0.85131	0.00113		0.85131	0.00306
0.65449	0.41058		0.63362	0.41225		0.8523	0.00113		0.8523	0.00306
0.62676	0.77417		0.91485	0.2208		0.85329	0.00113		0.85329	0.00306
0.64081	0.64038		0.30708	0.23593		0.85428	0.00113		0.85428	0.00306
0.64906	0.35064		0.65201	0.30671		0.855	0.00113		0.855	0.00306
0.6414	0.83017		0.68002	0.23607		0.85527	0.00113		0.85527	0.00306
0.64654	0.35926		0.64805	0.6588		0.85626	0.00113		0.85626	0.00306
0.63798	0.39824		0.62573	0.20631		0.85725	0.00113		0.85725	0.00306
0.65334	0.22456		0.65784	0.2501		0.85824	0.00113		0.85824	0.00306
0.63091	0.25495		0.63717	0.34805		0.85923	0.00113		0.85923	0.00306
0.64238	1.07852		0.72123	17.9743		0.86023	0.00113		0.86023	0.00306
0.64793	0.22979		0.63939	0.2224		0.86122	0.00113		0.86122	0.00306
0.656	0.91831		0.6422	0.21619		0.86221	0.00113		0.86221	0.00306
0.5761	0.3147		0.66636	0.25008		0.8632	0.00113		0.8632	0.00306
0.65684	0.32681		0.65766	0.33913		0.86419	0.00113		0.86419	0.00306
0.6623	0.41308		0.65588	0.22684		0.865	0.00113		0.865	0.00306
0.64722	0.20397		0.56365	0.36705		0.86518	0.00113		0.86518	0.00306
0.67853	0.22254		0.63571	0.24004		0.86617	0.00113		0.86617	0.00306
0.64194	0.49999		0.65953	0.34366		0.86716	0.00113		0.86716	0.00306
0.6597	0.24425		0.578	0.2946		0.86815	0.00113		0.86815	0.00306
0.62381	0.28359		0.64142	0.39477		0.86914	0.00113		0.86914	0.00306
0.64758	0.20825		0.63727	0.33262		0.87014	0.00113		0.87014	0.00306
0.63868	1.0139		0.64529	0.20372		0.87113	0.00113		0.87113	0.00306
0.61448	0.23424		0.65286	0.43665		0.87212	0.00113		0.87212	0.00306
0.64442	0.40187		0.64983	0.2075		0.87311	0.00113		0.87311	0.00306
0.6138	0.20773		0.40316	0.51874		0.8741	0.00113		0.8741	0.00306
0.63914	0.3035		0.3609	0.25898		0.875	0.00113		0.875	0.00306
0.65029	0.41452		0.63914	0.52572		0.87509	0.00113		0.87509	0.00306
0.64322	1.53666		0.64737	0.23131		0.87608	0.00113		0.87608	0.00306
0.63713	0.65572		0.61629	0.68754		0.87707	0.00113		0.87707	0.00306
0.65381	0.26077		0.65115	0.36604		0.87806	0.00113		0.87806	0.00306
0.64913	0.5304		0.65469	0.25411		0.87905	0.00113		0.87905	0.00306
0.63693	0.25986		0.64862	0.24291		0.88005	0.00113		0.88005	0.00306
0.64392	1.07239		0.67213	0.20956		0.88104	0.00113		0.88104	0.00306
0.64985	0.43173		0.63891	0.24395		0.88203	0.00113		0.88203	0.00306
0.64174	0.30938		0.66448	0.43486		0.88302	0.00113		0.88302	0.00306
0.64373	0.51489		0.34576	0.76311		0.88401	0.00113		0.88401	0.00306
0.62572	0.39731		0.64556	0.50969		0.885	0.00113		0.885	0.00306
0.63078	0.4611		0.65589	0.36296		0.885	0.00113		0.885	0.00306
0.59358	0.37553		0.64366	0.25616		0.88599	0.00113		0.88599	0.00306
0.65715	0.30004		0.65205	0.29795		0.88698	0.00113		0.88698	0.00306
0.64405	0.62926		0.66091	0.24518		0.88797	0.00113		0.88797	0.00306
0.65664	0.30899		0.63538	0.42679		0.88896	0.00113		0.88896	0.00306
0.62515	0.2026		0.59822	0.31974		0.88995	0.00113		0.88995	0.00306
0.66394	1.31346		0.64929	0.23943		0.89095	0.00113		0.89095	0.00306
0.63206	0.4366		0.62181	0.42357		0.89194	0.00113		0.89194	0.00306
0.60253	0.23984		0.66972	0.22563		0.89293	0.00113		0.89293	0.00306
0.63774	0.40793		0.66109	0.24753		0.89392	0.00113		0.89392	0.00306
0.63686	0.57311		0.86279	0.28308		0.89491	0.00113		0.89491	0.00306
0.65664	0.23065		0.65358	0.24967		0.895	0.00113		0.895	0.00306
0.64677	0.39778		0.62724	0.44259		0.8959	0.00113		0.8959	0.00306
0.63615	0.39788		0.64553	0.2607		0.89689	0.00113		0.89689	0.00306
0.65115	0.24392		0.63388	0.25853		0.89788	0.00113		0.89788	0.00306
0.64196	0.3347		0.66302	0.37582		0.89887	0.00113		0.89887	0.00306
0.64647	0.49513		0.6084	0.42461		0.89986	0.00113		0.89986	0.00306
0.64996	0.57129		0.62537	0.31132		0.90086	0.00113		0.90086	0.00306
0.63572	0.97935		0.65828	0.21392		0.90185	0.00113		0.90185	0.00306
0.64382	0.32719		0.64533	0.22383		0.905	0.00113		0.905	0.00306
0.65134	0.30364		0.67061	0.28198		0.915	0.00113		0.915	0.00306
0.63984	0.38361		0.65551	0.28745		0.925	0.00113		0.925	0.00306
0.64336	0.82413		0.61274	0.27378		0.935	0.00113		0.935	0.00306
0.63321	0.60305		0.6719	0.44336		0.945	0.00113		0.945	0.00306
0.60828	0.34457		0.66342	0.20041		0.955	0.00113		0.955	0.00306
0.63868	0.55726		0.78538	0.22666		0.965	0.00113		0.965	0.00306
0.66386	0.27217		0.63762	0.52772		0.975	0.00113		0.975	0.00306
0.64075	0.4106		0.65778	0.36242		0.985	0.00113		0.985	0.00306
0.6338	0.32031		0.65749	0.49127		0.995	0.00113		0.995	0.00306
0.63592	0.21953		0.6411	0.229
0.63352	0.20398		0.62996	0.2728
0.58533	0.56484		0.67895	0.26477
0.64474	0.43594		0.60184	0.33841
0.67449	0.23964		0.64786	0.25961
0.63927	0.9099		0.62719	0.36318
0.63179	0.50792		0.65247	0.42718
0.65004	0.44164		0.64334	0.36548
0.65981	0.30428		0.64655	0.63679
0.63314	0.30428		0.64763	0.87794
0.63284	0.22389		0.66461	0.23568
0.65995	0.73525		0.64248	0.32308
0.62514	0.35984		0.6917	0.24717
0.63364	1.14256		0.18363	0.32362
0.65104	0.48439		0.65324	0.26367
0.6399	0.3564		0.6717	0.22788
0.64754	0.66964		0.6365	0.4055
0.65327	0.3043		0.66046	0.27731
0.60133	0.24551		0.65311	0.33845
0.65224	0.56758		0.62242	0.20661
0.65186	0.24883		0.65658	0.2647
0.67097	0.24494		0.63703	0.22726
0.57476	0.27241		0.65242	0.26279
0.64386	0.84372		0.64998	0.25954
0.6381	0.41235		0.64681	0.33632
0.63925	0.6625		0.53885	0.25482
0.64236	0.28782		0.74786	0.36275
0.64157	0.49177		0.67489	0.20281
0.65698	0.27895		0.63745	0.80885
0.60046	0.71632		0.6442	0.28011
0.59763	0.51637		0.65335	0.48253
0.64489	0.4121		0.64379	0.68479
0.59572	0.34465		0.62922	0.34393
0.635	0.47278		0.64447	0.24217
0.64693	0.25614		0.64555	0.4598
0.64613	0.31172		0.56747	0.24004
0.64554	0.45725		0.62679	0.20826
0.64918	0.49105		0.95355	0.29434
0.60066	0.3844		0.91995	0.64891
0.63907	0.62831		0.91167	0.2322
0.60903	0.42101		0.94083	0.29995
0.63031	0.52468		0.91766	0.21768
0.64088	0.26732		0.94017	0.30854
0.66265	0.2062		0.9619	0.20141
0.66963	0.31928		0.90844	0.24747
0.59758	0.25032		0.65825	0.67421
0.63248	0.52276		0.66378	0.26242
0.63108	0.45567		0.6097	0.26877
0.62572	0.24193		0.63141	0.27389
0.6391	0.38831		0.63665	0.22317
0.6463	0.98281		0.64709	0.4348
0.65424	0.33426		0.64378	0.22145
0.65094	1.05668		0.67396	0.22698
0.65093	0.3911		0.66989	0.20233
0.65527	0.38745		0.728	0.23511
0.66382	0.20045		0.6641	0.2878
0.65125	0.27091		0.43234	1.63206
0.64813	0.55449		0.66559	0.31116
0.61978	0.30837		0.6546	0.52788
0.62138	0.23397		0.65251	0.33474
0.63573	0.50522		0.65901	0.22614
0.63649	0.35714		0.64854	0.25117
0.65391	0.32851		0.65781	0.35394
0.6054	0.33902		0.66372	0.21445
0.68261	0.27116		0.64556	0.28194
0.63225	0.34396		0.67809	0.21235
0.60219	0.40837		0.64516	0.45016
0.64724	0.92804		0.64438	0.26562
0.54309	0.35597		0.63715	0.21296
0.66331	0.21493		0.69321	0.3079
0.64821	0.34764		0.69437	1.20068
0.64385	1.03466		0.66645	0.28388
0.64291	0.2739		0.63461	0.24135
0.6475	0.45948		0.67089	0.28533
0.64512	0.58255		0.65648	0.50293
0.64654	0.57174		0.63868	0.88753
0.66232	0.4085		0.65744	0.22058
0.57713	0.70384		0.64993	0.30751
0.65329	0.2149		0.29185	1.36729
0.64323	0.73149		0.63978	0.27546
0.64027	0.96637		0.64304	0.61733
0.61715	0.44465		0.64517	0.41835
0.68533	0.97201		0.32859	2.20322
0.65509	0.36139		0.74915	2.31456
0.63844	0.42049		0.65874	0.33861
0.65333	0.33352		0.65631	0.28313
0.63803	0.77497		0.6499	0.51171
0.66399	0.50428		0.62975	0.40664
0.62417	0.48233		0.65841	0.28744
0.64997	0.20921		0.65073	0.45465
0.65111	0.30772		0.65446	0.22632
0.63331	0.488		0.63164	0.33567
0.64606	0.31201		0.65965	0.22979
0.65855	0.2235		0.64167	0.34589
0.64121	0.22192		0.65348	0.30622
0.67798	0.21531		0.70881	0.28778
0.62344	0.35502		0.63932	0.24273
0.6503	0.2275		0.63892	0.38348
0.61735	0.43059		0.66996	0.33291
0.63051	1.19222		0.65501	0.21093
0.64186	1.43235		0.62734	0.28169
0.64528	0.57583		0.65128	0.51981
0.63519	0.77527		0.74591	0.2998
0.63948	0.33297		0.65233	0.20032
0.64056	0.27609		0.47955	0.27072
0.63401	0.5879		0.66673	0.42852
0.64729	0.43523		0.63199	0.52196
0.64478	0.6744		0.63012	0.22306
0.63511	0.53498		0.59688	0.20717
0.64462	0.32723		0.66242	0.24417
0.63982	0.25587		0.64389	0.57582
0.64581	0.3883		0.64583	0.51629
0.63291	0.28308		0.66319	0.25726
0.64029	0.26461		0.6438	0.40009
0.6218	0.82426		0.66867	0.2238
0.65172	0.82445		0.65629	0.21246
0.64251	0.73842		0.64631	0.30192
0.66376	0.29817		0.63395	0.33886
0.68129	0.24291		0.66496	0.23681
0.64778	0.31386		0.64834	0.39076
0.6526	0.84029		0.65023	0.23866
0.66088	0.76191		0.63565	0.24917
0.65261	0.39604		0.65012	0.40429
0.64866	0.43232		0.62657	0.22387
0.64985	0.33167		0.64398	0.34215
0.67859	0.26594		0.64003	0.44347
0.67571	0.2032		0.6546	0.38278
0.63236	0.69944		0.60878	0.66735
0.63115	0.55186		0.60776	0.29808
0.64463	0.46358		0.64569	0.6068
0.6542	0.4688		0.65093	0.43499
0.63812	1.06345		0.65113	0.21948
0.65379	0.46434		0.63749	0.40262
0.64801	0.63111		0.64811	0.73156
0.62857	0.35449		0.62993	0.21608
0.64439	0.57349		0.62427	0.28471
0.61974	0.26335		0.63998	0.35824
0.64321	0.62395		0.65862	0.34404
0.64731	0.25898		0.65141	0.26719
0.60019	0.67648		0.6271	0.20677
0.60659	1.25138		0.65344	0.21854
0.6517	0.45625		0.44707	0.20645
0.63635	0.775		0.64937	0.90487
0.63355	0.95535		0.63992	0.23285
0.66407	0.21283		0.67719	0.25722
0.63228	0.3871		0.66287	0.27132
0.64547	0.27828		0.66124	0.21689
0.63896	0.3327		0.61958	0.3395
0.65341	0.20274		0.66707	0.21521
0.65403	0.32294		0.63694	0.24281
0.64154	0.48955		0.64224	0.67639
0.64916	0.38128		0.6412	0.29895
0.62834	0.38019		0.62838	0.28718
0.64838	0.98098		0.63546	0.63002
0.62465	0.23171		0.75321	0.22939
0.6337	0.54725		0.64483	0.27557
0.64656	0.22712		0.60053	0.29075
0.65208	0.3077		0.62755	0.21457
0.65936	0.24381		0.64611	0.30446
0.60654	0.36361		0.65333	0.63618
0.66858	0.24275		0.47071	0.36338
0.649	0.23854		0.6281	0.23046
0.65496	0.27557		0.63067	0.30855
0.66368	0.20015		0.62639	0.49612
0.65809	0.2613		0.65215	0.36443
0.6084	0.57191		0.64111	0.67226
0.63018	0.75105		0.67537	0.20351
0.62806	0.29259		0.68267	0.23995
0.63581	0.46489		0.58389	0.28092
0.65125	0.53159		0.64906	0.34285
0.65013	0.28611		0.64075	0.25506
0.65458	0.35715		0.64542	0.22979
0.63502	0.25536		0.66248	0.22184
0.64244	0.44977		0.64099	0.36677
0.64262	0.47138		0.66252	0.27138
0.65444	0.40065		0.64733	0.4109
0.65433	0.27897		0.64431	0.29154
0.6449	0.48013		0.63503	0.54973
0.62311	0.39532		0.64172	0.20829
0.63381	0.28652		0.62519	0.2513
0.64965	0.7333		0.47537	0.23223
0.63199	1.00958		0.63313	0.27432
0.6534	0.37888		0.64092	0.43843
0.63295	0.20846		0.46779	0.45854
0.62982	0.46651		0.62174	0.26772
0.67512	0.37481		0.63719	0.26365
0.65909	0.29068		0.64279	0.25872
0.6399	0.44159		0.63166	0.27369
0.65627	0.35947		0.64454	0.29672
0.64537	0.5116		0.88232	0.26229
0.63486	0.86052		0.63462	0.22269
0.63546	0.25373		0.66165	0.2563
0.62575	0.27345		0.57195	0.37604
0.63579	0.44993		0.66334	0.29853
0.66298	0.38305		0.67203	0.34093
0.6354	0.85547		0.64686	0.41151
0.67583	0.27095		0.65669	0.21032
0.6429	0.39161		0.57282	0.54145
0.63707	1.04476		0.65884	0.29999
0.65503	0.46922		0.64443	0.35025
0.62929	0.35115		0.61134	0.27872
0.60437	0.29926		0.63444	0.36327
0.66574	0.46644		0.62704	0.31963
0.60085	0.63095		0.66676	0.22086
0.66058	0.32351		0.65101	0.4727
0.63895	0.48484		0.61583	0.35988
0.61703	0.21526		0.59882	3.80439
0.60305	0.45305		0.65622	10.6479
0.64557	0.77666		0.80076	0.23156
0.63658	0.72351		0.70048	3.30251
0.63389	0.48343		0.72159	0.21722
0.63523	0.30462		0.45977	5.59039
0.64738	0.32301		0.88467	0.25588
0.63882	0.49906		0.7069	0.21228
0.63864	1.24415		0.86243	0.20606
0.63176	0.29642		0.65203	0.20051
0.63726	1.0745		0.3342	0.20121
0.62635	0.34859		0.49688	0.26301
0.63435	0.69611		0.57248	0.87919
0.63927	0.34533		0.68895	1.21877
0.64	0.70989		0.74949	0.42065
0.64639	0.70437		0.9095	0.4688
0.61777	0.40875		0.93293	1.14971
0.66169	0.4826		0.88513	0.3425
0.63502	0.42665		0.92928	0.6604
0.63723	0.23894		0.93059	0.43699
0.64011	0.51612		0.93141	0.65883
0.65186	0.38146		0.93519	0.21686
0.63757	0.67538		0.9198	0.75424
0.63499	0.20925		0.9118	0.31972
0.62628	0.23109		0.92909	0.57211
0.64297	0.92914		0.66646	0.45955
0.63408	0.39827		0.82935	0.20566
0.62322	0.28956		0.25517	6.82821
0.63938	0.63944		0.75171	0.27288
0.66926	0.34564		0.74152	0.66057
0.65895	0.41031		0.72198	0.22174
0.63804	0.9196		0.73285	0.49928
0.66121	0.39194		0.70899	0.3805
0.63409	0.60088		0.90987	0.25152
0.65298	0.4722		0.19602	1.81892
0.65196	0.41983		0.74991	0.27559
0.64396	0.61616		0.7153	0.75968
0.63823	0.59944		0.6607	6.83633
0.6361	0.69504		0.72355	0.81715
0.66052	0.32301		0.65792	0.77895
0.64908	0.65887		0.53781	1.35398
0.64924	0.42447		0.97286	0.20837
0.63425	0.23124		0.71878	2.31354
0.65024	0.47877		0.32449	0.35497
0.64106	0.54715		0.84237	0.20965
0.63996	0.37316		0.68858	5.71454
0.61959	0.28419		0.4831	0.45953
0.64918	1.41429		0.41264	2.67674
0.65969	0.4428		0.74459	0.20455
0.63372	0.21963		0.98966	0.23921
0.63646	0.70983		0.94428	0.23509
0.6357	0.7752		0.84683	0.25826
0.6363	0.25096		0.74744	0.25359
0.61508	0.34663		0.93695	0.22039
0.63961	0.77812		0.71183	1.19881
0.60289	0.71161		0.50395	2.37654
0.64164	0.44435		0.93231	0.20653
0.66029	0.23553		0.75149	0.21586
0.64761	0.80337		0.91555	0.24353
0.62968	0.40232		0.58435	0.41104
0.63837	0.96318		0.62995	7.97969
0.62935	0.30468		0.75905	0.47953
0.66011	0.29701		0.76679	2.52081
0.64578	0.6077		0.91954	0.2431
0.65007	0.62422		0.68918	0.53121
0.64467	0.83509		0.65969	0.27543
0.64291	0.21179		0.54395	0.25533
0.63957	0.20565		0.63317	28.6888
0.63187	0.23793		0.76284	0.20091
0.63644	0.22166		0.93113	0.2216
0.64193	0.41969		0.91062	1.52668
0.61814	0.24277		0.95162	0.62638
0.63099	0.28806		0.75621	0.32799
0.64857	0.24564		0.7384	0.33675
0.64477	1.00759		0.70526	0.58012
0.62094	0.36592		0.70146	0.20443
0.64672	0.61123		0.68257	0.25801
0.63407	0.36796		0.75512	0.32121
0.64192	0.24367		0.25674	2.65949
0.65426	0.6878		0.63098	0.26318
0.64657	0.29384		0.70418	1.09594
0.59992	0.23673		0.61025	6.10085
0.67806	0.69763		0.69622	0.3098
0.61448	0.53423		0.67202	0.75429
0.64269	0.29644		0.71909	0.3322
0.64206	0.28845		0.44734	2.05918
0.59902	1.53972		0.71006	0.28168
0.6143	0.31137		0.56714	5.45076
0.62851	0.41826		0.71861	0.20692
0.65256	0.2758		0.60554	1.97417
0.6324	0.24246		0.69612	1.6197
0.64899	0.42994		0.87987	0.20619
0.64303	1.65461		0.23394	0.48574
0.65092	0.60008		0.76384	0.20116
0.63807	0.38785		0.97213	0.26835
0.63402	0.61571		0.80925	0.21505
0.62128	0.63585		0.90757	0.38515
0.65772	1.09743		0.91813	0.33381
0.6355	0.8265		0.79026	0.21879
0.62666	0.27927		0.30913	0.22716
0.63016	0.43838
0.62813	0.362
0.70057	0.28031
0.62627	0.29948
0.61265	0.45242
0.63632	1.21125
0.61205	0.92665
0.66021	0.22783
0.6517	0.23147
0.65492	0.23985
0.65227	0.45197
0.62853	0.31155
0.63438	0.37848
0.62443	0.24444
0.65488	0.3205
0.63707	0.24152
0.64272	0.9077
0.62148	0.46017
0.63061	0.92363
0.62562	0.22334
0.58072	0.21921
0.6453	0.25522
0.62943	0.48835
0.64595	0.59237
0.65651	0.34334
0.63874	0.60761
0.65369	0.45919
0.66107	0.32293
0.65349	0.2546
0.61296	0.22161
0.64806	0.38647
0.64998	0.66784
0.64848	0.20266
0.63039	0.27038
0.61604	0.21783
0.64748	0.28068
0.63475	0.30871
0.6328	0.84941
0.6627	0.21226
0.66258	0.53522
0.6402	0.47876
0.64012	0.64669
0.62494	0.2086
0.63091	0.28702
0.6193	0.28479
0.62629	0.45628
0.58712	0.39816
0.63327	0.34273
0.62051	0.32278
0.64136	0.28354
0.62938	0.30657
0.63733	0.31803
0.61187	1.22311
0.64656	0.21222
0.63267	0.24844
0.64114	0.35284
0.64595	0.36415
0.63082	0.82398
0.64153	0.62428
0.639	0.82224
0.65068	1.2073
0.67036	0.25167
0.64441	0.83195
0.71302	0.27753
0.60492	0.53593
0.58323	0.22311
0.65773	0.2968
0.64651	0.27212
0.63251	0.47113
0.65083	0.30356
0.63232	0.5396
0.6401	0.35968
0.6698	0.3436
0.62668	0.23337
0.64947	0.53098
0.6391	0.25588
0.65126	0.44611
0.65961	0.3348
0.624	0.38901
0.63703	0.53999
0.62519	0.62658
0.642	0.52675
0.64967	0.63126
0.63089	0.35671
0.62434	0.20122
0.61375	0.24672
0.61188	0.2989
0.65781	0.30508
0.64441	1.45205
0.63249	0.78809
0.63315	0.49305
0.63175	0.26734
0.6219	0.53306
0.62837	0.21215
0.65081	0.45062
0.64523	0.47799
0.64016	0.37486
0.56934	0.24468
0.64036	0.96966
0.62512	0.30324
0.6189	0.23588
0.65435	0.69621
0.4017	0.31738
0.65725	0.26432
0.64115	0.52087
0.63402	0.21907
0.64586	0.2383
0.65149	0.67117
0.61081	0.34193
0.62348	0.27978
0.63766	1.33567
0.63505	0.31999
0.63266	0.42767
0.64578	0.49352
0.64384	1.84645
0.64521	0.35876
0.63502	0.72237
0.6047	1.12663
0.63251	1.20784
0.65002	0.31438
0.62818	0.64625
0.64253	0.95975
0.64126	0.74674
0.60107	1.1397
0.65237	0.42765
0.66008	0.60055
0.62748	0.2003
0.66046	0.21032
0.62852	0.20303
0.64629	0.28118
0.64453	0.64351
0.65241	1.29582
0.66531	0.26483
0.65101	0.44703
0.64091	0.75921
0.64969	0.39486
0.64506	0.41971
0.65374	0.31275
0.64697	0.89074
0.62986	0.46888
0.64129	0.26699
0.6451	0.5321
0.64506	1.06965
0.6393	0.26834
0.64177	1.05468
0.65321	0.26957
0.60006	0.52127
0.64923	0.80743
0.62874	0.3481
0.64289	1.02412
0.64309	0.29959
0.64035	0.51861
0.63715	0.86516
0.63684	0.21489
0.64314	0.888
0.6371	0.3935
0.64008	0.27764
0.65392	1.09623
0.63108	0.54113
0.6336	0.45603
0.64157	0.41238
0.64208	0.53733
0.63752	0.70593
0.65243	0.44382
0.63961	0.49539
0.64792	0.82679
0.65258	0.66602
0.62459	0.75176
0.62496	0.96394
0.64518	0.42391
0.6378	0.31915
0.6546	0.24137
0.62841	0.51367
0.63944	0.96945
0.65523	0.24293
0.65485	0.51416
0.6637	0.29952
0.65922	0.28731
0.63309	1.1299
0.64141	0.49895
0.64639	0.27394
0.61793	0.45578
0.63281	0.51499
0.6414	0.63999
0.63532	0.43613
0.59081	0.64165
0.61087	0.40127
0.6406	0.25857
0.64617	0.28421
0.64418	0.3859
0.6394	0.30363
0.65149	0.59079
0.64239	0.25612
0.64173	0.36132
0.64487	0.45572
0.67659	0.2255
0.65666	0.21257
0.65274	0.45524
0.59903	1.01849
0.64852	1.03178
0.65318	1.06758
0.64533	0.26015
0.63017	0.65997
0.66675	0.45243
0.64313	1.70932
0.65835	0.51117
0.60643	0.47131
0.63676	0.83971
0.61314	0.40277
0.63193	0.47041
0.61821	0.24302
0.63978	0.32281
0.6361	1.24554
0.60434	0.41048
0.59309	2.39625
0.64457	0.26756
0.64627	0.79054
0.66549	0.3399
0.63799	0.38898
0.6462	0.25396
0.65216	0.41217
0.65722	0.2631
0.63451	0.39518
0.64488	0.22652
0.65508	0.20816
0.64592	0.24996
0.63909	0.46214
0.64472	0.20876
0.65136	0.24625
0.41961	0.38226
0.63601	0.35985
0.6519	0.43036
0.59542	0.37901
0.64667	1.04133
0.65798	0.33548
0.66073	0.33885
0.63069	0.29139
0.63727	0.23502
0.57827	0.81449
0.65669	0.36762
0.63586	0.74937
0.6335	0.20259
0.45963	0.20665
0.65125	0.41782
0.64627	0.24717
0.64128	1.44431
0.63914	0.42122
0.63179	0.32908
0.62927	0.35918
0.64753	0.3361
0.66019	0.22381
0.63562	0.42528
0.66169	0.42247
0.63323	0.41662
0.65451	0.58403
0.64682	0.33495
0.63901	0.56906
0.60883	0.63615
0.65231	0.22745
0.64621	0.49488
0.65326	0.349
0.63358	1.19343
0.63577	0.67391
0.65211	0.22052
0.65733	0.26129
0.63758	0.34747
0.63107	0.3911
0.64667	0.37029
0.62193	0.48383
0.65191	0.25516
0.64975	0.29129
0.64925	0.35446
0.64265	0.66999
0.6476	0.41674
0.64756	0.78273
0.64583	0.38074
0.6482	0.61953
0.65719	0.27934
0.65562	0.23836
0.61623	0.53111
0.64896	0.34843
0.65603	0.32852
0.67541	0.2109
0.65682	0.23994
0.65203	0.3036
0.61988	0.5729
0.67068	0.29841
0.6408	0.36787
0.61586	0.23697
0.63329	0.22851
0.66357	0.42629
0.62933	0.27645
0.59458	0.53362
0.68424	0.22114
0.6502	0.43281
0.63663	0.86452
0.64303	0.35103
0.64905	0.45397
0.63932	0.95006
0.63592	0.70373
0.63929	0.21883
0.60933	0.25994
0.65478	0.3589
0.6415	0.9053
0.63943	0.43127
0.64678	0.7682
0.61613	0.38979
0.61858	0.91092
0.65567	0.40045
0.65342	0.21181
0.65249	0.48333
0.64431	0.69854
0.6613	0.33601
0.66292	0.27721
0.63828	0.29274
0.6396	0.39109
0.63382	0.38068
0.64233	0.40849
0.64987	0.27354
0.63208	0.51755
0.66406	0.25224
0.6381	0.768
0.64022	0.22396
0.64429	0.39238
0.64563	0.30664
0.68013	0.24853
0.64809	1.26738
0.63686	0.32525
0.67393	0.23247
0.64192	0.31524
0.64118	0.3998
0.63872	0.85171
0.63648	0.25639
0.64802	0.69083
0.65068	0.34216
0.62702	0.39427
0.65291	0.21713
0.63353	0.80327
0.64787	0.29607
0.64112	0.29173
0.67018	0.38048
0.63074	0.89336
0.6263	0.41969
0.63865	0.32689
0.63833	0.25908
0.65616	0.23346
0.65153	0.55941
0.63547	0.24895
0.65429	0.39129
0.6517	0.56811
0.65943	0.25476
0.7261	0.25983
0.63054	0.26399
0.65438	0.32631
0.65011	0.59181
0.63665	1.03945
0.65427	0.43105
0.65256	0.34178
0.65867	0.47914
0.65989	0.27519
0.63142	1.32331
0.62282	0.71636
0.65176	1.21019
0.63206	0.49923
0.65218	0.28379
0.64749	0.92365
0.66141	0.21218
0.63853	0.46242
0.6527	0.32029
0.63655	0.78376
0.63308	0.22602
0.63706	0.49741
0.64277	0.34315
0.63598	0.58037
0.57404	0.5827
0.65399	0.40062
0.68336	0.21501
0.6622	0.30743
0.64468	0.35573
0.61	0.36429
0.64885	0.66783
0.63756	0.83737
0.63948	0.76309
0.66603	0.21827
0.60149	0.26691
0.64832	0.37422
0.60788	0.28695
0.65422	0.41844
0.72227	0.20371
0.60326	0.63201
0.65862	0.2598
0.6386	0.71863
0.63239	0.2204
0.63087	0.4984
0.64379	0.29106
0.64295	0.32718
0.64275	0.25902
0.66044	0.54511
0.65106	0.44431
0.6555	0.43632
0.65114	0.54995
0.62793	0.34988
0.63045	0.37223
0.62585	0.46314
0.6545	0.42622
0.64176	0.3729
0.64816	0.39681
0.66644	0.34378
0.60187	0.31519
0.61691	0.57552
0.65131	0.47576
0.63736	0.90186
0.65255	0.30009
0.64344	0.63669
0.6598	0.73165
0.64075	0.40741
0.64392	0.27122
0.6737	0.21642
0.63793	0.27291
0.58429	0.29484
0.64148	0.83892
0.66436	0.47902
0.63999	0.92761
0.63665	0.91611
0.61193	0.26478
0.63601	0.3664
0.59434	1.10171
0.60955	0.84707
0.64815	0.2159
0.63874	0.64371
0.6316	0.90536
0.64327	1.09474
0.65082	0.70103
0.6496	0.36541
0.6508	0.25187
0.6431	0.35915
0.64517	0.51926
0.6372	0.34332
0.65133	0.28333
0.65204	0.53675
0.66757	0.20241
0.65647	0.21162
0.64995	0.41097
0.67903	0.20256
0.61043	0.37814
0.63682	0.36747
0.63719	0.88075
0.65316	1.13519
0.62472	0.60756
0.64161	0.5114
0.6365	0.37021
0.66523	0.29227
0.66559	0.32327
0.63863	0.72112
0.63845	0.44328
0.6452	1.00404
0.64164	1.25243
0.65697	0.45291
0.73127	0.54007
0.63562	0.74745
0.64202	1.00587
0.66238	0.22043
0.63138	0.52189
0.65892	0.47835
0.6339	0.71934
0.6325	0.90736
0.66989	0.26243
0.6512	0.52378
0.64271	0.451
0.60301	0.52638
0.73752	0.30245
0.63583	0.30071
0.57413	1.0202
0.63819	0.95551
0.64338	0.55134
0.63727	1.14594
0.6632	0.31221
0.66209	0.2521
0.65588	0.64909
0.63535	0.37903
0.61145	0.20701
0.63517	0.41112
0.65843	0.48478
0.64221	0.61581
0.6515	0.26325
0.65046	0.24783
0.66063	0.23051
0.64025	0.93935
0.63245	0.21601
0.36709	1.9356
0.61774	0.3705
0.60739	0.55286
0.64322	0.83766
0.66087	0.34243
0.63421	0.43509
0.6475	0.62301
0.64994	0.39812
0.60281	0.43893
0.66783	0.20178
0.67521	0.31217
0.65418	0.20441
0.67025	0.25064
0.63898	0.49093
0.59597	0.36363
0.64819	0.93338
0.6498	0.66735
0.63871	0.38136
0.62158	0.27188
0.59581	0.51603
0.62994	1.07144
0.60243	2.12647
0.66142	0.30852
0.64847	0.21247
0.66775	0.25236
0.6331	1.05492
0.63281	0.22145
0.65372	0.45779
0.66399	0.30258
0.64156	0.98812
0.64291	0.7838
0.64904	0.29106
0.64592	0.2604
0.6503	0.65986
0.63317	0.70449
0.67201	0.276
0.64876	0.20886
0.65262	0.29857
0.64696	0.39796
0.59724	0.26721
0.64625	0.20634
0.63413	0.96421
0.50925	0.25518
0.65459	0.35418
0.6294	0.24694
0.646	1.33964
0.62662	0.28556
0.64039	0.43589
0.62652	0.46772
0.63708	0.85028
0.63275	0.28706
0.59706	0.30201
0.64375	0.37614
0.6537	0.27385
0.67007	0.24909
0.64471	1.89218
0.6272	0.21486
0.63318	0.47447
0.64429	0.39686
0.6418	0.66956
0.64776	0.48538
0.58685	0.2928
0.64416	0.21083
0.65263	0.64714
0.64454	0.46713
0.64317	1.51145
0.63625	0.32843
0.5544	2.09745
0.64635	0.30334
0.64012	0.36321
0.60493	0.606
0.6418	0.3436
0.6337	1.12088
0.65732	0.4404
0.62086	0.22029
0.6443	0.30437
0.64264	0.5311
0.63774	0.55639
0.65948	0.30049
0.63732	0.29929
0.65595	1.03993
0.66671	0.20863
0.62449	0.49648
0.64173	0.46463
0.64406	0.73597
0.63626	0.65792
0.67517	0.22235
0.64933	0.2434
0.63242	0.50943
0.65279	0.37661
0.6373	0.75538
0.65125	0.39615
0.6406	1.14495
0.63763	0.58416
0.63783	0.71486
0.6536	0.35814
0.6563	0.24796
0.65555	0.84288
0.63744	0.73351
0.67245	0.28745
0.64949	0.78494
0.63799	0.95268
0.65059	0.84399
0.64227	0.33327
0.6679	0.23185
0.62665	0.42437
0.6495	0.25715
0.63035	0.40289
0.6148	0.22106
0.64873	0.9283
0.63778	0.29647
0.64098	0.30319
0.67109	0.50846
0.63028	0.58324
0.64869	1.13029
0.65778	0.48667
0.64634	0.28504
0.61273	0.48704
0.61963	0.26312
0.6484	0.34733
0.64933	0.43093
0.63552	0.54477
0.66369	0.37209
0.62692	0.44375
0.61725	0.21383
0.63144	0.4812
0.72934	0.20457
0.64326	0.35251
0.61534	0.27548
0.617	0.89319
0.65438	0.31503
0.65391	0.41072
0.67116	0.23613
0.63669	0.48356
0.6386	0.45304
0.64649	0.61264
0.64408	0.56103
0.65138	0.20438
0.6678	0.31922
0.64835	0.55556
0.63466	0.2009
0.66099	0.59423
0.62151	0.33461
0.64512	0.25401
0.6515	0.59118
0.62457	0.39252
0.63592	0.24698
0.63772	0.25774
0.63303	0.39628
0.62756	0.50428
0.62646	0.39394
0.63155	0.40635
0.64645	0.39588
0.64229	0.45127
0.639	0.25971
0.64174	0.27619
0.62852	0.53176
0.63249	0.30649
0.66033	0.30259
0.65469	0.4627
0.6476	0.27116
0.61635	0.41706
0.62053	0.4153
0.6424	0.24783
0.64965	0.36008
0.65475	0.51545
0.63692	0.36353
0.63393	0.58825
0.64816	0.84254
0.65119	1.17819
0.65274	0.57047
0.63975	1.06542
0.65016	0.53289
0.59977	0.34266
0.62944	0.81544
0.63785	0.37889
0.62719	0.24852
0.64293	0.71551
0.65561	0.72442
0.60304	1.89124
0.65969	0.47621
0.67343	1.07521
0.64277	0.22787
0.63151	0.37244
0.66001	0.74307
0.65879	0.28343
0.65044	0.223
0.64407	0.63639
0.61258	0.33913
0.62898	0.25427
0.65742	0.37178
0.63953	0.31559
0.64273	0.23281
0.64099	0.35523
0.64749	0.52446
0.63212	0.3934
0.61704	0.27824
0.63513	0.33252
0.64874	0.42866
0.63911	0.3201
0.69921	0.23673
0.60319	0.36234
0.63136	0.95915
[truncated: 32,544 more rows]

## Sheet: Fig. 2f
H41-10			H41-10R3(Cit)			Gaussian-fitting for H41-10			Gaussian-fitting for H41-10R3(Cit)			Mean Ib1/Io	Mean Ib2/Io	W1, h/2	W2, h/2	Rs
BlockDepth	Restime (ms)		BlockDepth	Restime (ms)		BlockDepth	Relative counts		BlockDepth	Relative counts		0.61884	0.65634	0.04188	0.03886	0.54642
0.64555	0.28535		0.7026	0.2125		0.005	0.00132		0.005	0.0012
0.62281	0.22322		0.63368	0.3938		0.00698	0.00132		0.00698	0.0012		K238N
0.61362	0.33898		0.61641	1.10798		0.00797	0.00132		0.00797	0.0012
0.6257	0.46759		0.61387	0.25849		0.00896	0.00132		0.00896	0.0012
0.59562	0.61521		0.53689	0.31141		0.00995	0.00132		0.00995	0.0012
0.63774	0.31905		0.63199	0.30142		0.01095	0.00132		0.01095	0.0012
0.64805	0.26395		0.54795	0.20604		0.01194	0.00132		0.01194	0.0012
0.57692	0.69659		0.62873	0.32663		0.01293	0.00132		0.01293	0.0012
0.61471	0.43703		0.71367	0.26862		0.01392	0.00132		0.01392	0.0012
0.58084	0.2643		0.26391	2.11359		0.01491	0.00132		0.01491	0.0012
0.62109	0.27073		0.64716	0.305		0.015	0.00132		0.015	0.0012
0.65168	0.2594		0.51381	0.51341		0.0159	0.00132		0.0159	0.0012
0.59897	0.49539		0.68133	0.27152		0.01689	0.00132		0.01689	0.0012
0.61517	0.61663		0.67872	0.24485		0.01788	0.00132		0.01788	0.0012
0.64202	0.44259		0.67094	0.35666		0.01887	0.00132		0.01887	0.0012
0.62065	0.32651		0.65017	0.31873		0.01986	0.00132		0.01986	0.0012
0.77904	2.87554		0.66497	0.32192		0.02086	0.00132		0.02086	0.0012
0.60497	0.82187		0.65248	0.69201		0.02185	0.00132		0.02185	0.0012
0.90675	0.2223		0.62688	0.46039		0.02284	0.00132		0.02284	0.0012
0.58763	0.23504		0.65445	0.20568		0.02383	0.00132		0.02383	0.0012
0.62838	0.26653		0.66167	0.43301		0.02482	0.00132		0.02482	0.0012
0.64491	0.20687		0.63912	0.33437		0.025	0.00132		0.025	0.0012
0.86878	0.21352		0.41202	0.57104		0.02581	0.00132		0.02581	0.0012
0.62501	0.40636		0.66846	0.28498		0.0268	0.00132		0.0268	0.0012
0.64168	0.22339		0.49849	0.56347		0.02779	0.00132		0.02779	0.0012
0.62758	0.3814		0.62526	1.04017		0.02878	0.00132		0.02878	0.0012
0.5836	0.33199		0.66216	0.33821		0.02977	0.00132		0.02977	0.0012
0.62819	0.29596		0.65348	0.50152		0.03077	0.00132		0.03077	0.0012
0.59322	0.24236		0.60694	0.23215		0.03176	0.00132		0.03176	0.0012
0.64015	0.25905		0.67139	0.22842		0.03275	0.00132		0.03275	0.0012
0.68505	0.28978		0.712	0.20795		0.03374	0.00132		0.03374	0.0012
0.60937	0.58776		0.6511	0.23718		0.03473	0.00132		0.03473	0.0012
0.61356	0.25757		0.68263	0.20048		0.035	0.00132		0.035	0.0012
0.59618	0.36844		0.6803	0.24202		0.03572	0.00132		0.03572	0.0012
0.63359	0.2905		0.48997	0.26674		0.03671	0.00132		0.03671	0.0012
0.63578	0.29214		0.63872	0.91746		0.0377	0.00132		0.0377	0.0012
0.57679	0.45929		0.46306	0.25946		0.03869	0.00132		0.03869	0.0012
0.64173	0.2849		0.66637	0.46296		0.03968	0.00132		0.03968	0.0012
0.58188	0.22319		0.66799	0.73413		0.04068	0.00132		0.04068	0.0012
0.57189	0.30183		0.66811	0.40233		0.04167	0.00132		0.04167	0.0012
0.59171	0.21509		0.65211	0.24359		0.04266	0.00132		0.04266	0.0012
0.68404	0.20357		0.61896	0.64224		0.04365	0.00132		0.04365	0.0012
0.6202	0.24779		0.67278	0.21214		0.04464	0.00132		0.04464	0.0012
0.60684	0.207		0.56308	0.32226		0.045	0.00132		0.045	0.0012
0.60854	0.2643		0.48639	0.20456		0.04563	0.00132		0.04563	0.0012
0.58753	0.28608		0.70546	0.26796		0.04662	0.00132		0.04662	0.0012
0.62275	0.21154		0.6384	0.47165		0.04761	0.00132		0.04761	0.0012
0.6194	0.5878		0.64914	0.26042		0.0486	0.00132		0.0486	0.0012
0.59859	0.388		0.67316	0.28659		0.04959	0.00132		0.04959	0.0012
0.61087	0.68972		0.63561	0.55868		0.05059	0.00132		0.05059	0.0012
0.61334	0.286		0.63383	0.2977		0.05158	0.00132		0.05158	0.0012
0.59745	0.7072		0.44675	0.30313		0.05257	0.00132		0.05257	0.0012
0.60448	0.38315		0.60316	0.27783		0.05356	0.00132		0.05356	0.0012
0.61166	0.2314		0.65304	0.42092		0.05455	0.00132		0.05455	0.0012
0.58748	0.2466		0.62274	0.4986		0.055	0.00132		0.055	0.0012
0.62666	0.24696		0.64623	0.29184		0.05554	0.00132		0.05554	0.0012
0.62179	0.35843		0.6403	0.58495		0.05653	0.00132		0.05653	0.0012
0.60676	0.57635		0.65519	0.22682		0.05752	0.00132		0.05752	0.0012
0.63122	0.22012		0.70201	0.23292		0.05851	0.00132		0.05851	0.0012
0.60483	0.43938		0.45971	0.20686		0.0595	0.00132		0.0595	0.0012
0.57273	0.3028		0.31492	0.34735		0.0605	0.00132		0.0605	0.0012
0.42325	0.47415		0.66088	0.44965		0.06149	0.00132		0.06149	0.0012
0.5938	0.36926		0.44961	0.50962		0.06248	0.00132		0.06248	0.0012
0.64254	0.25227		0.63823	0.21866		0.06347	0.00132		0.06347	0.0012
0.56983	0.37		0.65617	0.48676		0.06446	0.00132		0.06446	0.0012
0.64206	0.24407		0.66793	0.25817		0.065	0.00132		0.065	0.0012
0.56434	0.35067		0.35812	0.20598		0.06545	0.00132		0.06545	0.0012
0.63917	0.25035		0.66195	0.28561		0.06644	0.00132		0.06644	0.0012
0.66348	0.24515		0.30566	1.68615		0.06743	0.00132		0.06743	0.0012
0.64253	0.21158		0.61898	0.63349		0.06842	0.00132		0.06842	0.0012
0.62471	0.3122		0.65649	0.39908		0.06941	0.00132		0.06941	0.0012
0.61261	0.36048		0.66132	0.43058		0.07041	0.00132		0.07041	0.0012
0.60356	0.69609		0.65051	0.30357		0.0714	0.00132		0.0714	0.0012
0.61861	0.47553		0.66819	0.30068		0.07239	0.00132		0.07239	0.0012
0.60774	0.36387		0.73549	0.21215		0.07338	0.00132		0.07338	0.0012
0.60154	0.27667		0.65066	0.86929		0.07437	0.00132		0.07437	0.0012
0.6072	0.64243		0.66368	0.21674		0.075	0.00132		0.075	0.0012
0.63187	0.22303		0.6639	0.20141		0.07536	0.00132		0.07536	0.0012
0.6362	0.24013		0.67636	0.32023		0.07635	0.00132		0.07635	0.0012
0.61714	0.3048		0.5578	0.8513		0.07734	0.00132		0.07734	0.0012
0.60239	0.92506		0.68873	0.2518		0.07833	0.00132		0.07833	0.0012
0.60355	1.00612		0.64796	0.43288		0.07932	0.00132		0.07932	0.0012
0.65926	0.22116		0.65486	0.37614		0.08032	0.00132		0.08032	0.0012
0.64107	0.21624		0.65988	0.2742		0.08131	0.00132		0.08131	0.0012
0.64392	0.45069		0.64935	0.26754		0.0823	0.00132		0.0823	0.0012
0.60869	0.2394		0.52524	0.43983		0.08329	0.00132		0.08329	0.0012
0.68495	0.2332		0.59938	0.38165		0.08428	0.00132		0.08428	0.0012
0.5645	0.28734		0.47416	0.24731		0.085	0.00132		0.085	0.0012
0.61799	0.40699		0.61508	0.38134		0.08527	0.00132		0.08527	0.0012
0.61429	0.40348		0.57893	0.25752		0.08626	0.00132		0.08626	0.0012
0.6093	0.28208		0.57731	1.11737		0.08725	0.00132		0.08725	0.0012
0.63012	0.21008		0.65989	0.44644		0.08824	0.00132		0.08824	0.0012
0.59252	1.40242		0.72207	0.33897		0.08923	0.00132		0.08923	0.0012
0.63134	0.33269		0.34166	0.2055		0.09023	0.00132		0.09023	0.0012
0.61852	0.23419		0.64183	0.39956		0.09122	0.00132		0.09122	0.0012
0.56739	0.30698		0.45505	1.95174		0.09221	0.00132		0.09221	0.0012
0.64645	0.25115		0.62838	0.21666		0.0932	0.00132		0.0932	0.0012
0.61916	0.27431		0.6886	0.24817		0.09419	0.00132		0.09419	0.0012
0.61897	0.62696		0.47888	0.24278		0.095	0.00132		0.095	0.0012
0.61991	0.28705		0.61518	1.09926		0.09518	0.00132		0.09518	0.0012
0.64829	0.30317		0.90665	0.22766		0.09617	0.00132		0.09617	0.0012
0.61325	0.25872		0.40867	0.26304		0.09716	0.00132		0.09716	0.0012
0.56092	1.02508		0.60054	0.44854		0.09815	0.00132		0.09815	0.0012
0.63658	0.20266		0.59087	0.23742		0.09914	0.00132		0.09914	0.0012
0.60724	0.38763		0.65803	0.34538		0.10014	0.00132		0.10014	0.0012
0.60423	0.65041		0.65005	0.37438		0.10113	0.00132		0.10113	0.0012
0.65661	0.31923		0.58528	0.4365		0.10212	0.00132		0.10212	0.0012
0.64072	0.23657		0.65188	0.36801		0.10311	0.00132		0.10311	0.0012
0.6205	0.28521		0.4809	0.21554		0.1041	0.00132		0.1041	0.0012
0.64784	0.24835		0.65318	0.70611		0.105	0.00132		0.105	0.0012
0.61584	0.46225		0.09454	0.21974		0.10509	0.00132		0.10509	0.0012
0.642	0.60778		0.66728	0.74229		0.10608	0.00132		0.10608	0.0012
0.62656	0.37598		0.67894	0.32934		0.10707	0.00132		0.10707	0.0012
0.60771	0.33939		0.67105	0.32411		0.10806	0.00132		0.10806	0.0012
0.61687	0.36365		0.63864	0.24011		0.10905	0.00132		0.10905	0.0012
0.62156	0.41233		0.6476	0.93161		0.11005	0.00132		0.11005	0.0012
0.63459	0.33296		0.36815	0.40203		0.11104	0.00132		0.11104	0.0012
0.62189	0.39467		0.65064	0.45859		0.11203	0.00132		0.11203	0.0012
0.55727	0.2634		0.65884	0.23834		0.11302	0.00132		0.11302	0.0012
0.57904	0.47822		0.63904	0.2184		0.11401	0.00132		0.11401	0.0012
0.62054	0.21031		0.62845	0.80378		0.115	0.00132		0.115	0.0012
0.62905	0.23138		0.67837	0.26577		0.115	0.00132		0.115	0.0012
0.56737	0.63568		0.68028	0.26669		0.11599	0.00132		0.11599	0.0012
0.5724	0.74055		0.65765	0.45627		0.11698	0.00132		0.11698	0.0012
0.61208	0.54829		0.64337	1.55693		0.11797	0.00132		0.11797	0.0012
0.60867	0.22619		0.35571	0.30669		0.11896	0.00132		0.11896	0.0012
0.62843	0.23398		0.65704	0.40096		0.11995	0.00132		0.11995	0.0012
0.64161	0.20455		0.53746	0.31488		0.12095	0.00132		0.12095	0.0012
0.6058	0.37213		0.57778	1.97855		0.12194	0.00132		0.12194	0.0012
0.64747	0.2099		0.67158	0.31236		0.12293	0.00132		0.12293	0.0012
0.64833	0.23092		0.65702	0.29452		0.12392	0.00132		0.12392	0.0012
0.62289	0.42632		0.66296	0.5274		0.12491	0.00132		0.12491	0.0012
0.61193	0.74975		0.39396	0.51068		0.125	0.00132		0.125	0.0012
0.63428	0.43075		0.65211	0.47743		0.1259	0.00132		0.1259	0.0012
0.65651	0.22211		0.627	0.28393		0.12689	0.00132		0.12689	0.0012
0.6362	0.2103		0.66359	0.36416		0.12788	0.00132		0.12788	0.0012
0.60386	0.20623		0.66324	0.53428		0.12887	0.00132		0.12887	0.0012
0.61543	0.30326		0.65791	0.78374		0.12986	0.00132		0.12986	0.0012
0.57389	0.21174		0.46921	0.24818		0.13086	0.00132		0.13086	0.0012
0.60539	0.22776		0.64251	1.15238		0.13185	0.00132		0.13185	0.0012
0.57889	0.20206		0.64526	0.26922		0.13284	0.00132		0.13284	0.0012
0.61648	0.49889		0.67503	0.20434		0.13383	0.00132		0.13383	0.0012
0.56669	0.4452		0.51058	0.24766		0.13482	0.00132		0.13482	0.0012
0.54958	0.77788		0.68983	0.22238		0.135	0.00132		0.135	0.0012
0.63999	0.24586		0.67273	0.39589		0.13581	0.00132		0.13581	0.0012
0.31419	0.4461		0.64406	0.34726		0.1368	0.00132		0.1368	0.0012
0.6346	0.27353		0.6369	0.38597		0.13779	0.00132		0.13779	0.0012
0.61737	0.39035		0.62152	0.41195		0.13878	0.00132		0.13878	0.0012
0.56171	0.47089		0.62402	0.31939		0.13977	0.00132		0.13977	0.0012
0.64138	0.25907		0.46113	0.23063		0.14077	0.00132		0.14077	0.0012
0.63061	0.25947		0.63604	0.47939		0.14176	0.00132		0.14176	0.0012
0.64332	0.22677		0.66035	0.8767		0.14275	0.00132		0.14275	0.0012
0.55628	0.22587		0.63595	0.38883		0.14374	0.00132		0.14374	0.0012
0.62741	0.31149		0.66547	0.36955		0.14473	0.00132		0.14473	0.0012
0.59907	1.4035		0.6475	0.27747		0.145	0.00132		0.145	0.0012
0.61595	0.83643		0.59791	0.21049		0.14572	0.00132		0.14572	0.0012
0.59697	0.30242		0.65199	0.57812		0.14671	0.00132		0.14671	0.0012
0.61197	0.25092		0.6803	0.21546		0.1477	0.00132		0.1477	0.0012
0.62481	0.27783		0.65196	0.22123		0.14869	0.00132		0.14869	0.0012
0.59417	0.34025		0.59265	0.3827		0.14968	0.00132		0.14968	0.0012
0.66	0.28359		0.63942	0.52777		0.15068	0.00132		0.15068	0.0012
0.603	0.985		0.67105	0.33282		0.15167	0.00132		0.15167	0.0012
0.58765	0.30905		0.65866	0.47772		0.15266	0.00132		0.15266	0.0012
0.61112	0.5258		0.59301	1.09099		0.15365	0.00132		0.15365	0.0012
0.61396	0.27795		0.66861	0.49035		0.15464	0.00132		0.15464	0.0012
0.60637	0.30654		0.65757	0.39217		0.155	0.00132		0.155	0.0012
0.62915	0.58203		0.67825	0.26415		0.15563	0.00132		0.15563	0.0012
0.65145	0.21532		0.65434	0.30804		0.15662	0.00132		0.15662	0.0012
0.70262	1.27458		0.65658	0.29894		0.15761	0.00132		0.15761	0.0012
0.65265	0.22454		0.64741	0.86804		0.1586	0.00132		0.1586	0.0012
0.56741	0.29137		0.64791	0.59141		0.15959	0.00132		0.15959	0.0012
0.60512	0.22205		0.66557	0.34638		0.16059	0.00132		0.16059	0.0012
0.61705	0.20411		0.66027	0.36061		0.16158	0.00132		0.16158	0.0012
0.60888	0.45787		0.65165	0.38104		0.16257	0.00132		0.16257	0.0012
0.60642	1.0795		0.84981	0.20956		0.16356	0.00132		0.16356	0.0012
0.63178	0.26352		0.66357	0.21138		0.16455	0.00132		0.16455	0.0012
0.60058	0.47172		0.66057	0.25906		0.165	0.00132		0.165	0.0012
0.61722	0.32973		0.66304	0.43533		0.16554	0.00132		0.16554	0.0012
0.61592	0.36927		0.31444	1.69887		0.16653	0.00132		0.16653	0.0012
0.6004	1.15991		0.6442	0.75908		0.16752	0.00132		0.16752	0.0012
0.61342	0.31048		0.65483	0.34386		0.16851	0.00132		0.16851	0.0012
0.63085	0.29883		0.65376	0.4275		0.1695	0.00132		0.1695	0.0012
0.62854	0.21446		0.65781	0.42365		0.1705	0.00132		0.1705	0.0012
0.66865	0.24606		0.67935	0.23332		0.17149	0.00132		0.17149	0.0012
0.62483	0.27912		0.65239	0.29939		0.17248	0.00132		0.17248	0.0012
0.65768	0.27141		0.61534	0.52423		0.17347	0.00132		0.17347	0.0012
0.63309	0.23153		0.62886	0.23019		0.17446	0.00132		0.17446	0.0012
0.58595	0.21521		0.36742	0.60229		0.175	0.00132		0.175	0.0012
0.58004	0.33853		0.67296	0.20809		0.17545	0.00132		0.17545	0.0012
0.61315	0.48631		0.63222	0.29795		0.17644	0.00132		0.17644	0.0012
0.60939	0.30309		0.70364	0.21727		0.17743	0.00132		0.17743	0.0012
0.65261	0.25498		0.80132	0.23549		0.17842	0.00132		0.17842	0.0012
0.61614	0.32981		0.65117	0.57887		0.17941	0.00132		0.17941	0.0012
0.6024	0.42279		0.64236	0.69137		0.18041	0.00132		0.18041	0.0012
0.61922	0.43756		0.65478	0.26345		0.1814	0.00132		0.1814	0.0012
0.62368	0.37299		0.57558	0.28318		0.18239	0.00132		0.18239	0.0012
0.59711	0.32304		0.63094	0.21741		0.18338	0.00132		0.18338	0.0012
0.64113	0.2382		0.63454	0.24141		0.18437	0.00132		0.18437	0.0012
0.62451	0.26606		0.64591	0.53841		0.185	0.00132		0.185	0.0012
0.59064	0.29585		0.65283	0.52703		0.18536	0.00132		0.18536	0.0012
0.61787	0.42203		0.64791	0.42395		0.18635	0.00132		0.18635	0.0012
0.66205	1.80619		0.38272	0.23953		0.18734	0.00132		0.18734	0.0012
0.63516	0.39204		0.64391	0.20227		0.18833	0.00132		0.18833	0.0012
0.7806	0.27867		0.6692	0.32054		0.18932	0.00132		0.18932	0.0012
0.58686	0.31988		0.65241	0.65836		0.19032	0.00132		0.19032	0.0012
0.61889	0.28137		0.65817	0.25378		0.19131	0.00132		0.19131	0.0012
0.64606	0.31022		0.60745	1.19375		0.1923	0.00132		0.1923	0.0012
0.63257	0.32245		0.68418	0.34242		0.19329	0.00132		0.19329	0.0012
0.59411	0.30999		0.64756	0.30907		0.19428	0.00132		0.19428	0.0012
0.61981	0.40731		0.661	0.23469		0.195	0.00132		0.195	0.0012
0.61227	0.51043		0.65761	0.25646		0.19527	0.00132		0.19527	0.0012
0.63778	0.2296		0.66597	0.56058		0.19626	0.00132		0.19626	0.0012
0.64782	0.24154		0.65776	0.56012		0.19725	0.00132		0.19725	0.0012
0.60466	0.32658		0.65556	0.76293		0.19824	0.00132		0.19824	0.0012
0.61769	0.50972		0.68177	0.22599		0.19923	0.00132		0.19923	0.0012
0.62176	0.21806		0.70759	0.20073		0.20023	0.00132		0.20023	0.0012
0.6067	0.39131		0.64521	0.20063		0.20122	0.00132		0.20122	0.0012
0.59721	0.99156		0.65366	0.30421		0.20221	0.00132		0.20221	0.0012
0.61328	0.59076		0.64887	0.71817		0.2032	0.00132		0.2032	0.0012
0.62689	0.55151		0.62732	0.49841		0.20419	0.00132		0.20419	0.0012
0.61816	1.30594		0.49767	0.30378		0.205	0.00132		0.205	0.0012
0.61409	0.35193		0.63601	0.28833		0.20518	0.00132		0.20518	0.0012
0.67728	0.20542		0.59449	0.21341		0.20617	0.00132		0.20617	0.0012
0.61308	0.31927		0.67036	0.24221		0.20716	0.00132		0.20716	0.0012
0.60017	0.20574		0.64213	0.70706		0.20815	0.00132		0.20815	0.0012
0.61964	0.4477		0.62346	1.04093		0.20914	0.00132		0.20914	0.0012
0.62379	0.42631		0.66028	0.6585		0.21014	0.00132		0.21014	0.0012
0.60569	0.67349		0.66501	0.2107		0.21113	0.00132		0.21113	0.0012
0.61338	0.91978		0.65052	0.23909		0.21212	0.00132		0.21212	0.0012
0.51153	0.26927		0.62783	0.54873		0.21311	0.00132		0.21311	0.0012
0.59715	0.31096		0.65907	1.36423		0.2141	0.00132		0.2141	0.0012
0.69772	0.20801		0.68206	0.49458		0.215	0.00132		0.215	0.0012
0.61791	0.3515		0.64696	0.37944		0.21509	0.00132		0.21509	0.0012
0.62014	0.68295		0.42527	0.86313		0.21608	0.00132		0.21608	0.0012
0.61175	0.30814		0.63324	0.48226		0.21707	0.00132		0.21707	0.0012
0.60564	0.33422		0.63553	0.20505		0.21806	0.00132		0.21806	0.0012
0.60891	0.52575		0.67824	0.39851		0.21905	0.00132		0.21905	0.0012
0.6008	0.2425		0.65388	0.35615		0.22005	0.00132		0.22005	0.0012
0.6281	0.23557		0.67007	0.28794		0.22104	0.00132		0.22104	0.0012
0.59938	0.21742		0.68596	0.27563		0.22203	0.00132		0.22203	0.0012
0.63877	0.31034		0.69103	0.21542		0.22302	0.00132		0.22302	0.0012
0.61775	0.5034		0.67016	0.287		0.22401	0.00132		0.22401	0.0012
0.62509	0.26388		0.6557	0.39537		0.225	0.00132		0.225	0.0012
0.55606	0.37848		0.67037	0.44772		0.225	0.00132		0.225	0.0012
0.64643	0.22012		0.3847	0.21469		0.22599	0.00132		0.22599	0.0012
0.62901	0.50647		0.65985	0.27917		0.22698	0.00132		0.22698	0.0012
0.63624	0.31107		0.6627	0.70871		0.22797	0.00132		0.22797	0.0012
0.62662	0.24417		0.66249	0.2355		0.22896	0.00132		0.22896	0.0012
0.61894	0.47871		0.63501	0.2701		0.22995	0.00132		0.22995	0.0012
0.63112	0.42526		0.64102	0.24668		0.23095	0.00132		0.23095	0.0012
0.60128	0.30596		0.65932	0.38595		0.23194	0.00132		0.23194	0.0012
0.41268	0.42678		0.65466	0.21177		0.23293	0.00132		0.23293	0.0012
0.61707	0.55724		0.64335	0.52136		0.23392	0.00132		0.23392	0.0012
0.63689	0.23987		0.65968	0.53594		0.23491	0.00132		0.23491	0.0012
0.62198	0.49763		0.67607	0.46345		0.235	0.00132		0.235	0.0012
0.60042	0.20002		0.18517	1.2305		0.2359	0.00132		0.2359	0.0012
0.60372	0.71604		0.65112	0.61475		0.23689	0.00132		0.23689	0.0012
0.62983	0.24222		0.66949	0.23541		0.23788	0.00132		0.23788	0.0012
0.61945	0.47451		0.65499	0.21112		0.23887	0.00132		0.23887	0.0012
0.61356	0.61774		0.64927	0.62258		0.23986	0.00132		0.23986	0.0012
0.62009	0.87181		0.66025	0.42357		0.24086	0.00132		0.24086	0.0012
0.61429	0.5462		0.63975	0.74339		0.24185	0.00132		0.24185	0.0012
0.60833	0.58029		0.65083	0.66698		0.24284	0.00132		0.24284	0.0012
0.61279	0.36795		0.65975	0.24818		0.24383	0.00132		0.24383	0.0012
0.65439	0.22736		0.65607	1.07187		0.24482	0.00132		0.24482	0.0012
0.61255	0.33559		0.68435	0.41901		0.245	0.00132		0.245	0.0012
0.61875	0.34562		0.61104	0.88227		0.24581	0.00132		0.24581	0.0012
0.62281	0.48767		0.54957	0.33836		0.2468	0.00132		0.2468	0.0012
0.57421	0.25673		0.67159	0.3017		0.24779	0.00132		0.24779	0.0012
0.61925	0.43641		0.50078	0.6465		0.24878	0.00132		0.24878	0.0012
0.61896	0.65189		0.67997	0.39453		0.24977	0.00132		0.24977	0.0012
0.60106	0.46317		0.63785	0.24739		0.25077	0.00132		0.25077	0.0012
0.61589	0.40349		0.64646	0.66902		0.25176	0.00132		0.25176	0.0012
0.57214	0.52083		0.64945	0.39829		0.25275	0.00132		0.25275	0.0012
0.61443	0.56693		0.65326	0.41551		0.25374	0.00132		0.25374	0.0012
0.66364	0.23809		0.6505	0.21989		0.25473	0.00132		0.25473	0.0012
0.61656	0.25785		0.6137	0.64469		0.255	0.00132		0.255	0.0012
0.61055	0.53536		0.64738	0.20738		0.25572	0.00132		0.25572	0.0012
0.63204	0.28646		0.65204	0.26697		0.25671	0.00132		0.25671	0.0012
0.59138	0.22288		0.63889	0.43085		0.2577	0.00132		0.2577	0.0012
0.63299	0.22761		0.64451	0.34887		0.25869	0.00132		0.25869	0.0012
0.58384	0.30193		0.64844	0.84851		0.25968	0.00132		0.25968	0.0012
0.63432	0.29182		0.63551	0.57823		0.26068	0.00132		0.26068	0.0012
0.63658	0.28269		0.6287	0.27318		0.26167	0.00132		0.26167	0.0012
0.63019	0.32231		0.65262	0.82775		0.26266	0.00132		0.26266	0.0012
0.62041	0.2344		0.66593	0.20141		0.26365	0.00132		0.26365	0.0012
0.64907	0.34052		0.4961	0.4204		0.26464	0.00132		0.26464	0.0012
0.59905	0.62866		0.66989	0.2106		0.265	0.00132		0.265	0.0012
0.63646	0.36413		0.64235	0.3055		0.26563	0.00132		0.26563	0.0012
0.64952	0.2442		0.64989	0.31707		0.26662	0.00132		0.26662	0.0012
0.60516	0.31131		0.68686	0.22411		0.26761	0.00132		0.26761	0.0012
0.635	0.2205		0.66555	0.24602		0.2686	0.00132		0.2686	0.0012
0.63938	0.49432		0.65048	0.42008		0.26959	0.00132		0.26959	0.0012
0.58157	0.25572		0.64449	0.43325		0.27059	0.00132		0.27059	0.0012
0.57736	1.11452		0.10921	6.21118		0.27158	0.00132		0.27158	0.0012
0.64572	0.20721		0.68401	0.27861		0.27257	0.00132		0.27257	0.0012
0.59928	0.32871		0.66351	0.26703		0.27356	0.00132		0.27356	0.0012
0.61958	0.2844		0.67852	0.34462		0.27455	0.00132		0.27455	0.0012
0.61491	0.4729		0.66376	0.25736		0.275	0.00132		0.275	0.0012
0.65993	0.22072		0.67924	0.27829		0.27554	0.00132		0.27554	0.0012
0.60318	0.82037		0.68929	0.23171		0.27653	0.00132		0.27653	0.0012
0.65093	0.21382		0.62213	1.16207		0.27752	0.00132		0.27752	0.0012
0.62669	0.22353		0.66677	0.20531		0.27851	0.00132		0.27851	0.0012
0.60345	0.31506		0.65732	0.67401		0.2795	0.00132		0.2795	0.0012
0.65842	0.28322		0.65933	0.26076		0.2805	0.00132		0.2805	0.0012
0.62347	0.25544		0.68456	0.2489		0.28149	0.00132		0.28149	0.0012
0.61558	0.26741		0.6633	0.37364		0.28248	0.00132		0.28248	0.0012
0.34539	0.40118		0.65632	0.6527		0.28347	0.00132		0.28347	0.0012
0.62173	0.39174		0.6501	0.49586		0.28446	0.00132		0.28446	0.0012
0.60423	1.03931		0.67497	0.368		0.285	0.00132		0.285	0.0012
0.6346	0.2841		0.65962	0.49551		0.28545	0.00132		0.28545	0.0012
0.61935	0.61476		0.65132	0.21843		0.28644	0.00132		0.28644	0.0012
0.57799	0.49989		0.67129	1.07971		0.28743	0.00132		0.28743	0.0012
0.61772	0.45631		0.66431	0.34929		0.28842	0.00132		0.28842	0.0012
0.61911	0.4526		0.65324	0.81503		0.28941	0.00132		0.28941	0.0012
0.60081	0.22724		0.65825	0.72015		0.29041	0.00132		0.29041	0.0012
0.61373	0.21474		0.64704	0.94733		0.2914	0.00132		0.2914	0.0012
0.61951	0.22795		0.63268	0.40416		0.29239	0.00132		0.29239	0.0012
0.59295	0.47087		0.63932	0.50653		0.29338	0.00132		0.29338	0.0012
0.63751	0.35402		0.63972	0.73109		0.29437	0.00132		0.29437	0.0012
0.61585	0.60753		0.63062	0.62751		0.295	0.00132		0.295	0.0012
0.64958	0.20542		0.65173	0.38733		0.29536	0.00132		0.29536	0.0012
0.62491	0.60509		0.67095	0.33638		0.29635	0.00132		0.29635	0.0012
0.58906	0.6225		0.63398	0.72304		0.29734	0.00132		0.29734	0.0012
0.6248	0.25504		0.66156	0.25187		0.29833	0.00132		0.29833	0.0012
0.61072	0.29437		0.67068	0.32696		0.29932	0.00132		0.29932	0.0012
0.55735	0.43735		0.65498	0.40061		0.30032	0.00132		0.30032	0.0012
0.61846	1.00337		0.46761	0.51864		0.30131	0.00132		0.30131	0.0012
0.65011	0.27771		0.65636	0.24915		0.3023	0.00132		0.3023	0.0012
0.60373	0.23488		0.63674	0.53418		0.30329	0.00132		0.30329	0.0012
0.60672	0.26051		0.63682	0.32715		0.30428	0.00132		0.30428	0.0012
0.56111	0.20285		0.65711	0.38478		0.305	0.00132		0.305	0.0012
0.58396	0.26934		0.65735	0.42034		0.30527	0.00132		0.30527	0.0012
0.61971	0.36649		0.64811	0.25492		0.30626	0.00132		0.30626	0.0012
0.5962	0.24071		0.65777	0.34548		0.30725	0.00132		0.30725	0.0012
0.62958	0.2881		0.64896	0.2303		0.30824	0.00132		0.30824	0.0012
0.6073	0.33529		0.67081	0.34038		0.30923	0.00132		0.30923	0.0012
0.62368	0.2248		0.6344	0.46862		0.31023	0.00132		0.31023	0.0012
0.60747	0.38551		0.66205	0.26908		0.31122	0.00132		0.31122	0.0012
0.60656	0.26054		0.64584	0.37538		0.31221	0.00132		0.31221	0.0012
0.59792	0.24312		0.674	0.42326		0.3132	0.00132		0.3132	0.0012
0.77348	0.20803		0.66395	0.55824		0.31419	0.00132		0.31419	0.0012
0.63847	0.36857		0.68841	0.21299		0.315	0.00132		0.315	0.0012
0.60399	0.25051		0.50931	0.24324		0.31518	0.00132		0.31518	0.0012
0.64349	0.392		0.65843	0.32996		0.31617	0.00132		0.31617	0.0012
0.59299	0.47969		0.64201	0.84546		0.31716	0.00132		0.31716	0.0012
0.59607	0.39857		0.67678	0.24064		0.31815	0.00132		0.31815	0.0012
0.63175	0.40571		0.66851	0.38001		0.31914	0.00132		0.31914	0.0012
0.62948	0.23566		0.65971	0.40894		0.32014	0.00132		0.32014	0.0012
0.57563	0.39405		0.62908	0.22277		0.32113	0.00132		0.32113	0.0012
0.63167	0.25116		0.68476	0.25301		0.32212	0.00132		0.32212	0.0012
0.6084	0.33778		0.65446	1.00821		0.32311	0.00132		0.32311	0.0012
0.31954	0.26693		0.67425	0.79088		0.3241	0.00132		0.3241	0.0012
0.63325	0.35883		0.66882	0.30092		0.325	0.00132		0.325	0.0012
0.59004	0.51872		0.64627	0.431		0.32509	0.00132		0.32509	0.0012
0.63845	0.20727		0.59193	0.21705		0.32608	0.00132		0.32608	0.0012
0.54876	0.39042		0.64452	0.38475		0.32707	0.00132		0.32707	0.0012
0.61534	0.4056		0.68782	0.32097		0.32806	0.00132		0.32806	0.0012
0.63296	0.28655		0.69047	0.90432		0.32905	0.00132		0.32905	0.0012
0.5629	0.26021		0.58463	1.73967		0.33005	0.00132		0.33005	0.0012
0.60239	0.4985		0.63869	0.48795		0.33104	0.00132		0.33104	0.0012
0.64764	0.27147		0.66952	0.36492		0.33203	0.00132		0.33203	0.0012
0.61721	0.44421		0.64932	0.52721		0.33302	0.00132		0.33302	0.0012
0.6188	0.28138		0.65316	0.69556		0.33401	0.00132		0.33401	0.0012
0.61808	0.29731		0.66575	0.59707		0.335	0.00132		0.335	0.0012
0.62056	0.59884		0.66108	0.2624		0.33599	0.00132		0.33599	0.0012
0.63977	0.20693		0.65481	0.21975		0.33698	0.00132		0.33698	0.0012
0.61876	0.89083		0.64637	0.26894		0.33797	0.00132		0.33797	0.0012
0.617	0.40404		0.43272	0.22639		0.33896	0.00132		0.33896	0.0012
0.59915	0.49581		0.6436	0.80461		0.33995	0.00132		0.33995	0.0012
0.64857	0.22991		0.66402	0.37713		0.34095	0.00132		0.34095	0.0012
0.60873	0.36762		0.66558	0.20658		0.34194	0.00132		0.34194	0.0012
0.61648	0.46574		0.52239	0.85217		0.34293	0.00132		0.34293	0.0012
0.59631	0.53452		0.65426	0.37448		0.34392	0.00132		0.34392	0.0012
0.59837	0.22859		0.66882	0.30905		0.34491	0.00132		0.34491	0.0012
0.61421	0.44662		0.64832	0.28447		0.345	0.00132		0.345	0.0012
0.61496	0.64921		0.68879	0.29481		0.3459	0.00132		0.3459	0.0012
0.62671	0.41167		0.66367	0.31262		0.34689	0.00132		0.34689	0.0012
0.5922	0.29464		0.65114	0.94786		0.34788	0.00132		0.34788	0.0012
0.62789	0.21754		0.65874	0.38608		0.34887	0.00132		0.34887	0.0012
0.59429	0.21121		0.64546	0.41581		0.34986	0.00132		0.34986	0.0012
0.61563	0.78961		0.65109	0.60393		0.35086	0.00132		0.35086	0.0012
0.61395	0.55377		0.6734	0.2658		0.35185	0.00132		0.35185	0.0012
0.62543	0.2494		0.66383	0.24788		0.35284	0.00132		0.35284	0.0012
0.60343	0.73656		0.66363	0.67419		0.35383	0.00132		0.35383	0.0012
0.61808	0.34751		0.57102	0.23692		0.35482	0.00132		0.35482	0.0012
0.62969	0.27067		0.65147	0.23069		0.355	0.00132		0.355	0.0012
0.55716	0.27499		0.65088	0.24058		0.35581	0.00132		0.35581	0.0012
0.60198	0.3709		0.63033	0.79383		0.3568	0.00132		0.3568	0.0012
0.63825	0.3245		0.66568	0.26703		0.35779	0.00132		0.35779	0.0012
0.62384	0.20251		0.68253	0.27743		0.35878	0.00132		0.35878	0.0012
0.59735	0.38011		0.65522	0.41865		0.35977	0.00132		0.35977	0.0012
0.62089	0.25742		0.45816	0.21017		0.36077	0.00132		0.36077	0.0012
0.58384	0.25157		0.68178	0.24876		0.36176	0.00132		0.36176	0.0012
0.6358	0.50967		0.61068	0.65721		0.36275	0.00132		0.36275	0.0012
0.55869	0.40301		0.61563	0.22094		0.36374	0.00132		0.36374	0.0012
0.62106	0.40573		0.70044	0.27131		0.36473	0.00132		0.36473	0.0012
0.64721	0.3387		0.68312	0.21049		0.365	0.00132		0.365	0.0012
0.60464	0.32028		0.6579	0.21797		0.36572	0.00132		0.36572	0.0012
0.61272	0.34707		0.67895	0.28222		0.36671	0.00132		0.36671	0.0012
0.59336	0.67652		0.66927	0.34036		0.3677	0.00132		0.3677	0.0012
0.6463	0.23476		0.6296	0.72584		0.36869	0.00132		0.36869	0.0012
0.60868	0.64273		0.66049	0.90185		0.36968	0.00132		0.36968	0.0012
0.66618	0.20834		0.64781	0.22182		0.37068	0.00132		0.37068	0.0012
0.63439	0.31576		0.64055	0.52993		0.37167	0.00132		0.37167	0.0012
0.60313	0.23126		0.64442	0.39223		0.37266	0.00132		0.37266	0.0012
0.59655	0.31964		0.65292	0.74407		0.37365	0.00132		0.37365	0.0012
0.62993	0.30926		0.66464	0.35513		0.37464	0.00132		0.37464	0.0012
0.6108	0.25067		0.65245	0.27438		0.375	0.00132		0.375	0.0012
0.55734	0.90327		0.66989	0.52569		0.37563	0.00132		0.37563	0.0012
0.60168	0.91499		0.6668	0.40207		0.37662	0.00132		0.37662	0.0012
0.6251	0.24515		0.69585	0.21366		0.37761	0.00132		0.37761	0.0012
0.63247	0.24773		0.65987	0.34722		0.3786	0.00132		0.3786	0.0012
0.5959	0.2781		0.68554	0.20877		0.37959	0.00132		0.37959	0.0012
0.61362	0.26622		0.66318	1.13893		0.38059	0.00132		0.38059	0.0012
0.63823	0.26675		0.66916	0.42237		0.38158	0.00132		0.38158	0.0012
0.62568	0.40358		0.68243	0.25029		0.38257	0.00132		0.38257	0.0012
0.63971	0.33536		0.64659	0.57829		0.38356	0.00132		0.38356	0.0012
0.60704	0.23527		0.65136	0.3432		0.38455	0.00132		0.38455	0.0012
0.6333	0.28311		0.62263	0.23563		0.385	0.00132		0.385	0.0012
0.64434	0.24282		0.65421	0.52632		0.38554	0.00132		0.38554	0.0012
0.6218	0.47127		0.64103	0.79134		0.38653	0.00132		0.38653	0.0012
0.60558	0.47578		0.64348	0.69939		0.38752	0.00132		0.38752	0.0012
0.60953	0.78033		0.65214	0.50725		0.38851	0.00132		0.38851	0.0012
0.63184	0.34343		0.67318	0.21242		0.3895	0.00132		0.3895	0.0012
0.49304	0.22849		0.65244	0.40572		0.3905	0.00132		0.3905	0.0012
0.60618	0.55894		0.64872	0.46522		0.39149	0.00132		0.39149	0.0012
0.57512	0.22239		0.64367	0.27869		0.39248	0.00132		0.39248	0.0012
0.60032	0.25979		0.64315	0.33774		0.39347	0.00132		0.39347	0.0012
0.66815	0.27559		0.65322	0.59747		0.39446	0.00132		0.39446	0.0012
0.60136	0.35858		0.64281	0.61859		0.395	0.00132		0.395	0.0012
0.61295	0.26978		0.67829	0.21542		0.39545	0.00132		0.39545	0.0012
0.62573	0.52358		0.67937	0.34153		0.39644	0.00132		0.39644	0.0012
0.61047	0.28737		0.68473	0.23735		0.39743	0.00132		0.39743	0.0012
0.63232	0.31362		0.63069	0.30993		0.39842	0.00132		0.39842	0.0012
0.62011	0.63611		0.63813	0.84427		0.39941	0.00132		0.39941	0.0012
0.62706	0.51024		0.63992	0.74891		0.40041	0.00132		0.40041	0.0012
0.56446	0.32332		0.66493	0.20814		0.4014	0.00132		0.4014	0.0012
0.61545	0.24432		0.67386	0.20745		0.40239	0.00132		0.40239	0.0012
0.5893	0.24765		0.63615	0.8826		0.40338	0.00132		0.40338	0.0012
0.6136	0.41455		0.6558	0.26299		0.40437	0.00132		0.40437	0.0012
0.62085	0.47891		0.64818	0.70032		0.405	0.00132		0.405	0.0012
0.62166	0.35417		0.53151	0.24737		0.40536	0.00132		0.40536	0.0012
0.66195	0.20623		0.67758	0.21175		0.40635	0.00132		0.40635	0.0012
0.56951	0.64394		0.5656	0.38626		0.40734	0.00132		0.40734	0.0012
0.59581	0.49956		0.65644	0.28512		0.40833	0.00132		0.40833	0.0012
0.62819	0.4858		0.6669	0.23204		0.40932	0.00132		0.40932	0.0012
0.61008	0.22579		0.67216	0.20418		0.41032	0.00132		0.41032	0.0012
0.62205	0.37587		0.68731	0.21581		0.41131	0.00132		0.41131	0.0012
0.69472	0.83077		0.64857	0.59555		0.4123	0.00132		0.4123	0.0012
0.61974	0.29252		0.67644	0.2884		0.41329	0.00132		0.41329	0.0012
0.61435	0.26528		0.65429	0.36436		0.41428	0.00132		0.41428	0.0012
0.62293	0.25953		0.33247	1.05427		0.415	0.00132		0.415	0.0012
0.75479	0.31783		0.65255	0.209		0.41527	0.00132		0.41527	0.0012
0.60176	0.20743		0.66294	0.51087		0.41626	0.00132		0.41626	0.0012
0.60896	0.26821		0.6205	0.22836		0.41725	0.00132		0.41725	0.0012
0.59102	0.427		0.63984	0.51623		0.41824	0.00132		0.41824	0.0012
0.62334	0.42341		0.69449	0.27275		0.41923	0.00132		0.41923	0.0012
0.60901	0.23858		0.66531	0.38091		0.42023	0.00132		0.42023	0.0012
0.61214	0.32737		0.67476	0.34239		0.42122	0.00132		0.42122	0.0012
0.631	0.35664		0.60957	0.24656		0.42221	0.00132		0.42221	0.0012
0.63794	0.2304		0.671	0.25866		0.4232	0.00132		0.4232	0.0012
0.63196	0.29813		0.65474	0.2986		0.42419	0.00132		0.42419	0.0012
0.61728	0.52327		0.64575	0.25086		0.425	0.00132		0.425	0.0012
0.6013	0.59198		0.65898	0.70283		0.42518	0.00132		0.42518	0.0012
0.59681	0.30248		0.62258	0.21901		0.42617	0.00132		0.42617	0.0012
0.61462	0.42073		0.65328	0.70775		0.42716	0.00132		0.42716	0.0012
0.58621	0.61162		0.66428	0.31401		0.42815	0.00132		0.42815	0.0012
0.61028	0.71353		0.66795	0.42501		0.42914	0.00132		0.42914	0.0012
0.6068	0.59975		0.64772	0.22889		0.43014	0.00132		0.43014	0.0012
0.55953	0.23436		0.64616	0.74679		0.43113	0.00132		0.43113	0.0012
0.57554	0.21977		0.64727	0.26276		0.43212	0.00132		0.43212	0.0012
0.62308	0.2881		0.64033	0.36266		0.43311	0.00132		0.43311	0.0012
0.61788	0.32537		0.67282	0.30957		0.4341	0.00132		0.4341	0.0012
0.63747	0.51457		0.66238	0.32853		0.435	0.00132		0.435	0.0012
0.59599	0.23647		0.68303	0.26872		0.43509	0.00132		0.43509	0.0012
0.6406	0.21764		0.63754	0.56441		0.43608	0.00132		0.43608	0.0012
0.69635	0.70931		0.61677	0.23749		0.43707	0.00132		0.43707	0.0012
0.62513	0.38355		0.63012	0.39587		0.43806	0.00132		0.43806	0.0012
0.59062	0.55204		0.6928	0.24893		0.43905	0.00132		0.43905	0.0012
0.59778	0.38265		0.66515	1.4664		0.44005	0.00132		0.44005	0.0012
0.59543	0.23513		0.59753	0.46015		0.44104	0.00132		0.44104	0.0012
0.60832	1.52314		0.66604	0.29862		0.44203	0.00132		0.44203	0.0012
0.63829	0.49419		0.63762	1.15917		0.44302	0.00132		0.44302	0.0012
0.58876	0.33846		0.65749	0.31988		0.44401	0.00132		0.44401	0.0012
0.57727	0.47215		0.64758	0.33601		0.445	0.00132		0.445	0.0012
0.67608	0.23595		0.66629	0.65559		0.445	0.00132		0.445	0.0012
0.6185	0.23119		0.64111	0.42033		0.44599	0.00132		0.44599	0.0012
0.61559	0.45141		0.70694	0.23585		0.44698	0.00132		0.44698	0.0012
0.59515	0.8389		0.63919	0.27985		0.44797	0.00132		0.44797	0.0012
0.54374	0.53621		0.65989	0.24956		0.44896	0.00132		0.44896	0.0012
0.64911	0.36748		0.6422	0.67148		0.44995	0.00132		0.44995	0.0012
0.60588	0.22388		0.66258	0.5512		0.45095	0.00132		0.45095	0.0012
0.6395	0.20799		0.67489	0.24828		0.45194	0.00132		0.45194	0.0012
0.58206	0.44718		0.65667	0.6258		0.45293	0.00132		0.45293	0.0012
0.57775	0.30794		0.6578	0.33475		0.45392	0.00132		0.45392	0.0012
0.64586	0.30715		0.64227	0.33901		0.45491	0.00132		0.45491	0.0012
0.63922	0.24993		0.6416	0.28786		0.455	0.00132		0.455	0.0012
0.50817	0.57401		0.66294	0.24152		0.4559	0.00132		0.4559	0.0012
0.63037	0.44786		0.66332	0.54047		0.45689	0.00132		0.45689	0.0012
0.62892	0.2638		0.66534	0.43913		0.45788	0.00132		0.45788	0.0012
0.60658	0.20719		0.66651	0.38696		0.45887	0.00132		0.45887	0.0012
0.61599	0.21397		0.66216	0.25746		0.45986	0.00132		0.45986	0.0012
0.60536	0.22075		0.65802	0.3969		0.46086	0.00132		0.46086	0.0012
0.60717	0.26384		0.65671	0.59468		0.46185	0.00132		0.46185	0.0012
0.60478	0.56269		0.62866	0.22953		0.46284	0.00132		0.46284	0.0012
0.63584	0.30412		0.67012	0.34709		0.46383	0.00132		0.46383	0.0012
0.64771	0.23908		0.6545	0.71733		0.46482	0.00132		0.46482	0.0012
0.59358	0.22759		0.63197	0.3066		0.465	0.00132		0.465	0.0012
0.63173	0.24411		0.67644	0.41362		0.46581	0.00132		0.46581	0.0012
0.63749	0.21791		0.64927	0.57772		0.4668	0.00132		0.4668	0.0012
0.61313	0.58351		0.64511	0.4761		0.46779	0.00132		0.46779	0.0012
0.5894	0.372		0.6677	0.56974		0.46878	0.00132		0.46878	0.0012
0.62301	0.23781		0.65957	0.41104		0.46977	0.00132		0.46977	0.0012
0.57906	0.39328		0.66672	0.34134		0.47077	0.00132		0.47077	0.0012
0.61714	0.88464		0.65321	0.51731		0.47176	0.00132		0.47176	0.0012
0.60765	0.24095		0.68709	0.25613		0.47275	0.00132		0.47275	0.0012
0.65451	0.20169		0.34628	0.2851		0.47374	0.00132		0.47374	0.0012
0.61988	0.83631		0.64307	0.59913		0.47473	0.00132		0.47473	0.0012
0.64704	0.2693		0.65431	0.2045		0.475	0.00132		0.475	0.0012
0.64667	0.33934		0.65893	1.12749		0.47572	0.00132		0.47572	0.0012
0.61767	0.62233		0.65904	0.34738		0.47671	0.00132		0.47671	0.0012
0.57438	0.24794		0.64349	0.24301		0.4777	0.00132		0.4777	0.0012
0.58414	0.28841		0.64693	0.88348		0.47869	0.00132		0.47869	0.0012
0.61919	0.21015		0.65999	0.48274		0.47968	0.00132		0.47968	0.0012
0.68761	0.20421		0.68196	0.20151		0.48068	0.00132		0.48068	0.0012
0.6152	0.34864		0.64436	0.20243		0.48167	0.00132		0.48167	0.0012
0.6109	0.45829		0.68517	0.3236		0.48266	0.00132		0.48266	0.0012
0.60207	0.26298		0.64459	0.59282		0.48365	0.00132		0.48365	0.0012
0.6075	1.19914		0.66524	0.20041		0.48464	0.00132		0.48464	0.0012
0.61806	0.34749		0.62963	0.4086		0.485	0.00132		0.485	0.0012
0.62569	0.6627		0.6398	1.02949		0.48563	0.00132		0.48563	0.0012
0.64938	0.47168		0.6272	0.44981		0.48662	0.00132		0.48662	0.0012
0.61298	0.258		0.67364	0.4271		0.48761	0.00132		0.48761	0.0012
0.63079	0.34562		0.618	0.2289		0.4886	0.00132		0.4886	0.0012
0.62704	0.20793		0.21432	0.42275		0.48959	0.00132		0.48959	0.0012
0.62175	0.27071		0.65343	0.30317		0.49059	0.00132		0.49059	0.0012
0.5778	0.25454		0.6682	0.40557		0.49158	0.00132		0.49158	0.0012
0.612	0.20936		0.6714	0.28348		0.49257	0.00132		0.49257	0.0012
0.70604	0.87057		0.66239	0.93068		0.49356	0.00132		0.49356	0.0012
0.60388	0.35373		0.52557	0.31578		0.49455	0.00132		0.49455	0.0012
0.61942	0.28967		0.64659	0.3433		0.495	0.00132		0.495	0.0012
0.60868	0.2771		0.66764	1.16188		0.49554	0.00132		0.49554	0.0012
0.64382	0.26633		0.66623	0.48591		0.49653	0.00132		0.49653	0.0012
0.62073	0.25111		0.64226	0.32193		0.49752	0.00132		0.49752	0.0012
0.60827	0.21826		0.65771	0.63651		0.49851	0.00132		0.49851	0.0012
0.62002	0.88048		0.67208	0.44753		0.4995	0.00132		0.4995	0.0012
0.63801	0.2399		0.66372	0.92069		0.5005	0.00132		0.5005	0.0012
0.61776	0.31941		0.62461	0.48448		0.50149	0.00132		0.50149	0.0012
0.61778	0.79046		0.65965	0.22443		0.50248	0.00132		0.50248	0.0012
0.61062	0.57746		0.68046	0.35918		0.50347	0.00132		0.50347	0.0012
0.6035	0.26046		0.65039	0.42594		0.50446	0.00132		0.50446	0.0012
0.61857	0.2991		0.69419	0.25438		0.505	0.00132		0.505	0.0012
0.60447	0.96348		0.65695	0.41335		0.50545	0.00132		0.50545	0.0012
0.61727	0.25756		0.67453	0.29221		0.50644	0.00132		0.50644	0.0012
0.63652	0.24307		0.66912	0.44355		0.50743	0.00132		0.50743	0.0012
0.60581	0.21409		0.64186	0.41651		0.50842	0.00132		0.50842	0.0012
0.61527	0.41512		0.65414	0.34648		0.50941	0.00132		0.50941	0.0012
0.62626	0.29473		0.65093	0.26552		0.51041	0.00132		0.51041	0.0012
0.62623	0.53671		0.65143	0.20789		0.5114	0.00132		0.5114	0.0012
0.627	0.20795		0.66467	0.79644		0.51239	0.00132		0.51239	0.0012
0.6084	0.7674		0.66373	0.23753		0.51338	0.00132		0.51338	0.0012
0.63003	0.23549		0.58666	0.38348		0.51437	0.00132		0.51437	0.0012
0.61732	0.68376		0.64528	0.84622		0.515	0.00132		0.515	0.0012
0.6043	0.34213		0.61537	0.31977		0.51536	0.00132		0.51536	0.0012
0.65362	0.26637		0.62455	0.30855		0.51635	0.00132		0.51635	0.0012
0.56919	0.44938		0.65861	0.41083		0.51734	0.00132		0.51734	0.0012
0.55684	0.53219		0.67075	0.23921		0.51833	0.00132		0.51833	0.0012
0.7455	0.22708		0.67503	0.34109		0.51932	0.00132		0.51932	0.0012
0.66586	0.25178		0.65406	0.29083		0.52032	0.00132		0.52032	0.0012
0.5766	0.47994		0.64542	0.39843		0.52131	0.00132		0.52131	0.0012
0.60324	0.5274		0.65566	0.21671		0.5223	0.00132		0.5223	0.0012
0.60479	0.35121		0.69013	0.30258		0.52329	0.00132		0.52329	0.0012
0.59405	0.52685		0.64969	0.39345		0.52428	0.00132		0.52428	0.0012
0.62697	0.29135		0.67252	0.36795		0.525	0.00132		0.525	0.0012
0.63266	0.23161		0.6496	0.50051		0.52527	0.00132		0.52527	0.0012
0.5876	0.23556		0.66117	0.50049		0.52626	0.00132		0.52626	0.0012
0.50289	0.20619		0.65847	0.28338		0.52725	0.00132		0.52725	0.0012
0.60805	0.70458		0.66625	0.42863		0.52824	0.00132		0.52824	0.0012
0.65054	0.20314		0.66831	0.40391		0.52923	0.00132		0.52923	0.0012
0.59627	0.83134		0.64602	0.23075		0.53023	0.00132		0.53023	0.0012
0.63316	0.2692		0.6639	0.28062		0.53122	0.00132		0.53122	0.0012
0.64066	0.20372		0.65651	0.36851		0.53221	0.00132		0.53221	0.0012
0.69875	0.34059		0.649	0.57506		0.5332	0.00132		0.5332	0.0012
0.60722	0.26218		0.68718	0.44398		0.53419	0.00132		0.53419	0.0012
0.62856	0.40359		0.64086	0.24672		0.535	0.00132		0.535	0.0012
0.60884	0.29089		0.90635	0.27015		0.53518	0.00132		0.53518	0.0012
0.60728	0.33603		0.57843	0.23048		0.53617	0.00132		0.53617	0.0012
0.64843	0.2544		0.64296	0.33456		0.53716	0.00133		0.53716	0.0012
0.64659	0.22638		0.69035	0.23698		0.53815	0.00133		0.53815	0.0012
0.60271	1.07558		0.6505	0.45003		0.53914	0.00133		0.53914	0.0012
0.62867	0.84109		0.69773	0.25066		0.54014	0.00133		0.54014	0.0012
0.57074	0.25121		0.64706	0.71712		0.54113	0.00133		0.54113	0.0012
0.59593	0.20691		0.70987	0.22204		0.54212	0.00134		0.54212	0.0012
0.6254	0.23119		0.62932	0.41468		0.54311	0.00134		0.54311	0.0012
0.61111	0.46572		0.6789	0.50711		0.5441	0.00135		0.5441	0.0012
0.60231	0.29505		0.62752	0.54742		0.545	0.00136		0.545	0.0012
0.5615	0.27959		0.6643	0.46938		0.54509	0.00136		0.54509	0.0012
0.62395	0.34363		0.65161	0.48078		0.54608	0.00137		0.54608	0.0012
0.60676	0.5332		0.34158	0.35059		0.54707	0.00138		0.54707	0.0012
0.61619	0.3713		0.67351	0.24487		0.54806	0.00139		0.54806	0.0012
0.61308	0.25465		0.64843	0.51376		0.54905	0.00141		0.54905	0.0012
0.63267	0.42354		0.66453	0.43803		0.55005	0.00143		0.55005	0.0012
0.66838	0.2276		0.6478	0.49288		0.55104	0.00146		0.55104	0.0012
0.62306	0.37264		0.64557	0.41408		0.55203	0.00149		0.55203	0.0012
0.59985	0.28034		0.64776	0.66083		0.55302	0.00153		0.55302	0.0012
0.59457	0.28249		0.64944	0.20538		0.55401	0.00157		0.55401	0.0012
0.60496	0.70392		0.68606	0.31629		0.555	0.00163		0.555	0.0012
0.62277	0.28292		0.66029	1.45638		0.55599	0.0017		0.55599	0.0012
0.54801	0.26282		0.65109	0.49496		0.55698	0.00178		0.55698	0.0012
0.66422	0.31936		0.64018	0.58155		0.55797	0.00188		0.55797	0.0012
0.83953	0.22375		0.64318	0.39395		0.55896	0.00199		0.55896	0.0012
0.62317	0.51384		0.65105	0.31518		0.55995	0.00213		0.55995	0.0012
0.59342	0.25355		0.63813	0.72541		0.56095	0.0023		0.56095	0.0012
0.59703	0.60751		0.6762	0.21272		0.56194	0.00249		0.56194	0.0012
0.59722	0.2966		0.62988	0.44811		0.56293	0.00271		0.56293	0.0012
0.61774	0.40213		0.64936	0.43068		0.56392	0.00298		0.56392	0.0012
0.63154	0.30019		0.65503	0.20955		0.56491	0.00328		0.56491	0.0012
0.64934	0.2196		0.64807	0.28464		0.565	0.00331		0.565	0.0012
0.59791	0.35861		0.66716	0.25711		0.5659	0.00364		0.5659	0.0012
0.59703	0.26203		0.6796	0.20408		0.56689	0.00406		0.56689	0.0012
0.59768	0.23497		0.64108	0.96467		0.56788	0.00454		0.56788	0.0012
0.7063	1.37624		0.65274	0.21505		0.56887	0.00509		0.56887	0.0012
0.6267	0.83552		0.7012	0.22468		0.56986	0.00572		0.56986	0.0012
0.59509	0.36718		0.66212	0.59588		0.57086	0.00644		0.57086	0.0012
0.61089	0.5586		0.678	0.75864		0.57185	0.00726		0.57185	0.0012
0.5849	0.2299		0.64283	0.31092		0.57284	0.00819		0.57284	0.0012
0.61379	0.21172		0.64986	0.38577		0.57383	0.00924		0.57383	0.0012
0.60335	0.25462		0.68132	0.2405		0.57482	0.01043		0.57482	0.0012
0.63655	0.56026		0.62908	0.76308		0.575	0.01066		0.575	0.0012
0.62165	0.24741		0.67651	0.24886		0.57581	0.01176		0.57581	0.0012
0.64014	0.37377		0.65858	0.84435		0.5768	0.01325		0.5768	0.0012
0.60366	0.24698		0.67253	0.30457		0.57779	0.0149		0.57779	0.0012
0.63418	0.41986		0.65056	0.40416		0.57878	0.01674		0.57878	0.0012
0.59153	0.50418		0.65846	0.44073		0.57977	0.01878		0.57977	0.0012
0.62502	1.10911		0.65365	0.22592		0.58077	0.02102		0.58077	0.0012
0.56566	0.23371		0.66426	0.3587		0.58176	0.02348		0.58176	0.0012
0.6136	0.33828		0.67783	0.21034		0.58275	0.02617		0.58275	0.00121
0.59776	0.27561		0.64869	0.35032		0.58374	0.0291		0.58374	0.00121
0.60221	0.37015		0.63979	0.53175		0.58473	0.03229		0.58473	0.00121
0.62312	0.55666		0.66805	0.42782		0.585	0.0332		0.585	0.00122
0.64339	0.23454		0.6459	0.51364		0.58572	0.03572		0.58572	0.00122
0.61003	0.50804		0.61459	0.47851		0.58671	0.03943		0.58671	0.00123
0.62759	0.2707		0.65468	0.24438		0.5877	0.04339		0.5877	0.00123
0.63434	0.34291		0.64938	0.44692		0.58869	0.04763		0.58869	0.00124
0.90745	0.20484		0.66375	0.6851		0.58968	0.05214		0.58968	0.00126
0.61588	0.7163		0.64911	0.21209		0.59068	0.05691		0.59068	0.00127
0.61605	0.52668		0.54717	0.21155		0.59167	0.06195		0.59167	0.0013
0.61528	0.49406		0.62269	1.29936		0.59266	0.06723		0.59266	0.00132
0.6431	0.53417		0.66534	0.32854		0.59365	0.07275		0.59365	0.00135
0.65086	0.2823		0.64724	0.30333		0.59464	0.07849		0.59464	0.00139
0.60677	0.40391		0.6785	0.20887		0.595	0.08064		0.595	0.00141
0.5762	0.36549		0.65608	0.52702		0.59563	0.08444		0.59563	0.00144
0.59624	0.21972		0.61361	0.20962		0.59662	0.09057		0.59662	0.0015
0.59006	0.35438		0.59874	0.21429		0.59761	0.09686		0.59761	0.00158
0.62551	0.25883		0.66377	0.55418		0.5986	0.10326		0.5986	0.00166
0.56089	0.37512		0.67397	0.21156		0.59959	0.10977		0.59959	0.00177
0.61411	1.01492		0.65735	0.25722		0.60059	0.11633		0.60059	0.0019
0.61316	0.51281		0.67621	0.31621		0.60158	0.1229		0.60158	0.00206
0.62485	0.26477		0.66697	0.30485		0.60257	0.12946		0.60257	0.00225
0.92217	0.25433		0.65609	0.32491		0.60356	0.13595		0.60356	0.00248
0.64541	0.36463		0.44486	0.25098		0.60455	0.14233		0.60455	0.00274
0.59161	0.31633		0.64729	0.58792		0.605	0.14518		0.605	0.00288
0.61985	0.83028		0.63466	0.27954		0.60554	0.14855		0.60554	0.00306
0.53988	0.21135		0.67969	0.2156		0.60653	0.15458		0.60653	0.00344
0.78642	0.24316		0.64085	0.31657		0.60752	0.16035		0.60752	0.00388
0.61292	0.42215		0.66173	0.30162		0.60851	0.16584		0.60851	0.00439
0.63152	0.26594		0.65639	0.53525		0.6095	0.17098		0.6095	0.00499
0.52506	0.38797		0.63526	0.31178		0.6105	0.17574		0.6105	0.00569
0.64855	0.23226		0.64998	0.31916		0.61149	0.18008		0.61149	0.00649
0.64626	0.30458		0.60572	0.38747		0.61248	0.18396		0.61248	0.00742
0.62559	0.45369		0.64294	0.36031		0.61347	0.18734		0.61347	0.00848
0.63383	0.21825		0.6693	0.2083		0.61446	0.19021		0.61446	0.0097
0.60933	0.25091		0.65887	0.55553		0.615	0.19154		0.615	0.01043
0.62927	0.27887		0.6483	0.41865		0.61545	0.19252		0.61545	0.01108
0.61226	0.54248		0.61143	0.56246		0.61644	0.19425		0.61644	0.01265
0.62783	0.32887		0.65279	0.38833		0.61743	0.19541		0.61743	0.01441
0.55752	0.66189		0.64764	0.20114		0.61842	0.19596		0.61842	0.01639
0.64717	0.21599		0.06663	3.60796		0.61941	0.19591		0.61941	0.01861
0.63056	0.23082		0.06767	4.77159		0.62041	0.19525		0.62041	0.02108
0.61266	0.3107		0.06279	2.25257		0.6214	0.194		0.6214	0.02382
0.60973	0.39165		0.69832	0.24764		0.62239	0.19217		0.62239	0.02684
0.60324	0.76022		0.67916	0.27398		0.62338	0.18976		0.62338	0.03016
0.61649	0.44107		0.10299	0.2647		0.62437	0.18681		0.62437	0.03379
0.60852	0.25822		0.64218	0.56773		0.625	0.18466		0.625	0.03627
0.65173	0.24197		0.63395	0.44902		0.62536	0.18334		0.62536	0.03774
0.63092	0.20941		0.64386	0.38994		0.62635	0.17938		0.62635	0.04203
0.62616	0.20646		0.68749	0.20067		0.62734	0.17497		0.62734	0.04666
0.64106	0.23819		0.65336	1.09957		0.62833	0.17014		0.62833	0.05162
0.6322	0.25802		0.654	0.44446		0.62932	0.16494		0.62932	0.05693
0.65758	1.10648		0.64898	0.23516		0.63032	0.1594		0.63032	0.06258
0.65741	0.21462		0.6022	0.27582		0.63131	0.15358		0.63131	0.06856
0.59655	0.21163		0.65152	1.02294		0.6323	0.14752		0.6323	0.07485
0.61646	0.62025		0.65018	0.48166		0.63329	0.14127		0.63329	0.08144
0.64156	0.22681		0.6789	0.29391		0.63428	0.13486		0.63428	0.0883
0.63518	0.35816		0.66354	0.75353		0.635	0.13014		0.635	0.09345
0.76324	0.20016		0.68976	0.20943		0.63527	0.12836		0.63527	0.09541
0.54147	0.21203		0.67387	0.42921		0.63626	0.1218		0.63626	0.10273
0.61662	0.90684		0.64622	0.3999		0.63725	0.11522		0.63725	0.11023
0.68886	1.2027		0.6536	0.52551		0.63824	0.10867		0.63824	0.11786
0.62408	0.35036		0.63966	0.21972		0.63923	0.10218		0.63923	0.12558
0.91017	0.24997		0.65316	0.46293		0.64023	0.09579		0.64023	0.13333
0.61642	0.27847		0.65496	0.48679		0.64122	0.08953		0.64122	0.14105
0.62462	0.51141		0.64011	0.30118		0.64221	0.08343		0.64221	0.1487
0.61489	0.28939		0.66999	0.28018		0.6432	0.07751		0.6432	0.1562
0.56424	0.20726		0.67648	0.31699		0.64419	0.07181		0.64419	0.1635
0.61378	0.33398		0.66366	0.36855		0.645	0.0673		0.645	0.16928
0.62336	0.3229		0.67287	0.38745		0.64518	0.06632		0.64518	0.17053
0.59499	1.17216		0.64874	0.67088		0.64617	0.06108		0.64617	0.17723
0.6192	0.64762		0.68414	0.20295		0.64716	0.05609		0.64716	0.18354
0.6278	0.21286		0.61926	0.59089		0.64815	0.05136		0.64815	0.18939
0.6549	0.29241		0.64221	0.73253		0.64914	0.0469		0.64914	0.19473
0.63429	0.23805		0.68384	0.2559		0.65014	0.04271		0.65014	0.1995
0.58182	0.22746		0.64892	0.98966		0.65113	0.03878		0.65113	0.20367
0.61041	0.25932		0.68063	0.24913		0.65212	0.03513		0.65212	0.20717
0.61917	0.22376		0.65181	0.31982		0.65311	0.03173		0.65311	0.20998
0.61107	0.76337		0.64532	0.2425		0.6541	0.0286		0.6541	0.21207
0.6209	0.45522		0.65178	0.35888		0.655	0.02596		0.655	0.21332
0.60284	0.39788		0.65303	0.3007		0.65509	0.0257		0.65509	0.21341
0.59957	0.48615		0.6488	0.23888		0.65608	0.02305		0.65608	0.21399
0.63677	0.25838		0.70498	0.22282		0.65707	0.02063		0.65707	0.21381
0.63342	0.29214		0.63891	0.2774		0.65806	0.01842		0.65806	0.21286
0.60374	0.25045		0.61356	0.22684		0.65905	0.01642		0.65905	0.21115
0.57449	0.41111		0.66446	0.55335		0.66005	0.01461		0.66005	0.20871
0.70067	0.24017		0.65579	0.30698		0.66104	0.01299		0.66104	0.20556
0.59416	0.24376		0.64931	0.50158		0.66203	0.01153		0.66203	0.20174
0.61781	0.40905		0.66703	0.25325		0.66302	0.01022		0.66302	0.19727
0.63439	0.23502		0.6442	0.34683		0.66401	0.00906		0.66401	0.19222
0.61542	0.22156		0.66023	0.3186		0.665	0.00803		0.665	0.18663
0.53502	0.48688		0.65682	0.50758		0.66599	0.00711		0.66599	0.18055
0.63107	0.41448		0.6617	0.38791		0.66698	0.00631		0.66698	0.17405
0.62005	0.29517		0.66265	0.34323		0.66797	0.00561		0.66797	0.16718
0.60026	0.23954		0.66119	0.44655		0.66896	0.00499		0.66896	0.16001
0.62765	0.61555		0.65216	0.51559		0.66995	0.00445		0.66995	0.15261
0.6247	0.21381		0.68341	0.30693		0.67095	0.00398		0.67095	0.14503
0.65717	0.23166		0.66164	0.24888		0.67194	0.00358		0.67194	0.13733
0.62567	0.27095		0.64241	0.66542		0.67293	0.00323		0.67293	0.12959
0.64667	0.34639		0.65259	1.48807		0.67392	0.00293		0.67392	0.12185
0.6231	0.41803		0.67201	0.33244		0.67491	0.00267		0.67491	0.11417
0.61322	0.49218		0.67461	0.32803		0.675	0.00265		0.675	0.11347
0.59771	0.39452		0.66686	0.49318		0.6759	0.00245		0.6759	0.10659
0.69338	0.20256		0.62583	0.62294		0.67689	0.00227		0.67689	0.09917
0.61228	0.45458		0.65107	0.38968		0.67788	0.00211		0.67788	0.09195
0.60874	0.46341		0.64893	0.22314		0.67887	0.00197		0.67887	0.08495
0.61012	0.23803		0.67548	0.31744		0.67986	0.00186		0.67986	0.07822
0.63173	0.35147		0.65342	0.86749		0.68086	0.00177		0.68086	0.07177
0.6438	0.21496		0.65619	0.50637		0.68185	0.00169		0.68185	0.06563
0.60841	0.22272		0.67064	0.20753		0.68284	0.00162		0.68284	0.05981
0.63449	0.223		0.65368	0.36042		0.68383	0.00157		0.68383	0.05433
0.59912	0.20265		0.66041	0.28961		0.68482	0.00152		0.68482	0.04918
0.6162	0.23421		0.67904	0.23791		0.685	0.00151		0.685	0.04829
0.61241	0.96315		0.65115	0.35834		0.68581	0.00148		0.68581	0.04438
0.62113	0.43225		0.6503	0.30326		0.6868	0.00145		0.6868	0.03992
0.61067	0.48621		0.65877	0.33749		0.68779	0.00143		0.68779	0.03579
0.63752	0.33541		0.67213	0.33443		0.68878	0.00141		0.68878	0.032
0.62086	0.26272		0.67116	0.25479		0.68977	0.00139		0.68977	0.02852
0.57206	0.59495		0.65243	0.84937		0.69077	0.00137		0.69077	0.02534
0.6451	0.20147		0.68798	0.22392		0.69176	0.00136		0.69176	0.02246
0.63475	0.243		0.66874	0.3461		0.69275	0.00135		0.69275	0.01986
0.61202	0.25025		0.50475	0.22852		0.69374	0.00135		0.69374	0.01751
0.60741	0.21086		0.67442	0.21472		0.69473	0.00134		0.69473	0.01541
0.61332	0.50259		0.60922	0.2249		0.695	0.00134		0.695	0.01488
0.62332	0.50761		0.66856	0.46428		0.69572	0.00134		0.69572	0.01353
0.64529	0.33456		0.635	0.34411		0.69671	0.00133		0.69671	0.01187
0.60954	0.71478		0.67347	0.55648		0.6977	0.00133		0.6977	0.01039
0.60546	0.37257		0.39414	0.74804		0.69869	0.00133		0.69869	0.00909
0.58661	0.31959		0.65076	0.20003		0.69968	0.00133		0.69968	0.00795
0.6194	0.50185		0.66992	0.57224		0.70068	0.00133		0.70068	0.00696
0.58109	0.26725		0.65074	0.83606		0.70167	0.00132		0.70167	0.00609
0.62396	0.35027		0.6996	0.22829		0.70266	0.00132		0.70266	0.00534
0.62621	0.73875		0.76821	0.22139		0.70365	0.00132		0.70365	0.00469
0.57224	0.35501		0.64419	0.63851		0.70464	0.00132		0.70464	0.00413
0.61933	0.23194		0.6502	0.33241		0.705	0.00132		0.705	0.00395
0.5881	0.29151		0.66259	0.75327		0.70563	0.00132		0.70563	0.00365
0.62044	0.32693		0.65566	1.03278		0.70662	0.00132		0.70662	0.00325
0.57414	0.41642		0.62782	0.93493		0.70761	0.00132		0.70761	0.0029
0.58104	0.26788		0.62782	0.28261		0.7086	0.00132		0.7086	0.00261
0.63818	0.2187		0.67578	0.21344		0.70959	0.00132		0.70959	0.00236
0.60777	0.2435		0.65464	0.25217		0.71059	0.00132		0.71059	0.00215
0.63445	0.38846		0.64853	0.23533		0.71158	0.00132		0.71158	0.00198
0.60214	0.29794		0.65488	0.44153		0.71257	0.00132		0.71257	0.00184
0.65319	0.20202		0.64991	0.32365		0.71356	0.00132		0.71356	0.00172
0.59593	0.36394		0.651	0.36898		0.71455	0.00132		0.71455	0.00162
0.55147	0.22282		0.66159	0.47564		0.715	0.00132		0.715	0.00158
0.60405	0.38391		0.66535	0.26036		0.71554	0.00132		0.71554	0.00154
0.91369	0.26271		0.67439	0.47302		0.71653	0.00132		0.71653	0.00147
0.6198	0.20662		0.65328	0.3461		0.71752	0.00132		0.71752	0.00142
0.57096	0.21628		0.66823	0.30765		0.71851	0.00132		0.71851	0.00137
0.66946	0.2316		0.65658	0.36106		0.7195	0.00132		0.7195	0.00134
0.6496	0.21866		0.64479	0.28081		0.7205	0.00132		0.7205	0.00131
0.62232	0.37212		0.68715	0.24535		0.72149	0.00132		0.72149	0.00128
0.59967	0.4405		0.31495	0.28637		0.72248	0.00132		0.72248	0.00127
0.63954	0.2279		0.64631	0.64105		0.72347	0.00132		0.72347	0.00125
0.61734	0.36691		0.6553	0.36863		0.72446	0.00132		0.72446	0.00124
0.62081	0.3383		0.65005	0.41007		0.725	0.00132		0.725	0.00123
0.6206	0.30027		0.68052	0.21194		0.72545	0.00132		0.72545	0.00123
0.58172	0.97698		0.60552	0.37206		0.72644	0.00132		0.72644	0.00122
0.61009	0.26615		0.67527	0.27774		0.72743	0.00132		0.72743	0.00122
0.69103	0.22138		0.67036	0.30873		0.72842	0.00132		0.72842	0.00121
0.3698	0.30079		0.66804	0.56813		0.72941	0.00132		0.72941	0.00121
0.63251	0.45429		0.68637	0.21208		0.73041	0.00132		0.73041	0.00121
0.6284	0.26699		0.64539	0.32108		0.7314	0.00132		0.7314	0.0012
0.60827	0.24915		0.66862	0.21549		0.73239	0.00132		0.73239	0.0012
0.6224	0.57192		0.66355	0.29691		0.73338	0.00132		0.73338	0.0012
0.6118	0.26732		0.66187	0.42558		0.73437	0.00132		0.73437	0.0012
0.62714	0.50295		0.6809	0.21346		0.735	0.00132		0.735	0.0012
0.5879	0.3473		0.65216	0.23519		0.73536	0.00132		0.73536	0.0012
0.56324	0.41085		0.6256	0.84544		0.73635	0.00132		0.73635	0.0012
0.6154	0.66404		0.64314	0.51329		0.73734	0.00132		0.73734	0.0012
0.62207	0.2837		0.68566	0.2685		0.73833	0.00132		0.73833	0.0012
0.62066	0.4708		0.66109	0.2147		0.73932	0.00132		0.73932	0.0012
0.61915	0.84689		0.66519	0.34169		0.74032	0.00132		0.74032	0.0012
0.61515	0.46789		0.63574	0.66133		0.74131	0.00132		0.74131	0.0012
0.65781	0.3158		0.65726	0.22201		0.7423	0.00132		0.7423	0.0012
0.58792	0.34424		0.63997	0.64468		0.74329	0.00132		0.74329	0.0012
0.61263	0.55477		0.64474	0.74653		0.74428	0.00132		0.74428	0.0012
0.59861	0.57449		0.64862	1.14805		0.745	0.00132		0.745	0.0012
0.58392	0.95815		0.67039	0.64718		0.74527	0.00132		0.74527	0.0012
0.60126	0.62858		0.68249	0.35794		0.74626	0.00132		0.74626	0.0012
0.61947	0.61194		0.65696	0.31897		0.74725	0.00132		0.74725	0.0012
0.61415	0.91609		0.64294	0.74795		0.74824	0.00132		0.74824	0.0012
0.59697	0.3672		0.65297	0.2473		0.74923	0.00132		0.74923	0.0012
0.62111	0.51208		0.6551	0.67205		0.75023	0.00132		0.75023	0.0012
0.6245	0.80727		0.66354	0.21184		0.75122	0.00132		0.75122	0.0012
0.61659	0.41146		0.61733	0.33525		0.75221	0.00132		0.75221	0.0012
0.62728	0.42172		0.66409	0.20707		0.7532	0.00132		0.7532	0.0012
0.60087	0.26031		0.65598	0.21157		0.75419	0.00132		0.75419	0.0012
0.61305	0.58394		0.66092	0.23252		0.755	0.00132		0.755	0.0012
0.57564	0.22621		0.66926	0.54472		0.75518	0.00132		0.75518	0.0012
0.61563	0.29189		0.65448	0.97809		0.75617	0.00132		0.75617	0.0012
0.61216	0.57971		0.65671	0.37721		0.75716	0.00132		0.75716	0.0012
0.63027	0.25917		0.65509	0.23962		0.75815	0.00132		0.75815	0.0012
0.60796	0.50179		0.66233	0.33926		0.75914	0.00132		0.75914	0.0012
0.59604	0.68303		0.64958	0.24014		0.76014	0.00132		0.76014	0.0012
0.59383	0.35399		0.65151	0.54684		0.76113	0.00132		0.76113	0.0012
0.59948	0.23668		0.63656	0.26285		0.76212	0.00132		0.76212	0.0012
0.61311	0.52754		0.64199	0.35132		0.76311	0.00132		0.76311	0.0012
0.58901	0.35977		0.64149	0.82271		0.7641	0.00132		0.7641	0.0012
0.62819	0.34686		0.66177	0.23618		0.765	0.00132		0.765	0.0012
0.62303	0.7795		0.64774	0.56838		0.76509	0.00132		0.76509	0.0012
0.61515	0.28978		0.61958	0.22336		0.76608	0.00132		0.76608	0.0012
0.61486	0.51358		0.71073	0.20674		0.76707	0.00132		0.76707	0.0012
0.61528	0.50837		0.65049	0.5617		0.76806	0.00132		0.76806	0.0012
0.57115	0.33903		0.6581	0.39212		0.76905	0.00132		0.76905	0.0012
0.60797	0.29011		0.64804	0.94323		0.77005	0.00132		0.77005	0.0012
0.55986	0.24687		0.65385	0.23559		0.77104	0.00132		0.77104	0.0012
0.61022	0.86018		0.64809	1.53446		0.77203	0.00132		0.77203	0.0012
0.75608	0.44353		0.6517	0.50333		0.77302	0.00132		0.77302	0.0012
0.60904	0.20694		0.65195	0.66819		0.77401	0.00132		0.77401	0.0012
0.63399	0.35179		0.65467	0.41209		0.775	0.00132		0.775	0.0012
0.59082	0.64319		0.64947	0.53725		0.77599	0.00132		0.77599	0.0012
0.64697	0.21821		0.63129	0.60385		0.77698	0.00132		0.77698	0.0012
0.61029	0.93867		0.67624	0.28439		0.77797	0.00132		0.77797	0.0012
0.59522	0.44622		0.64635	0.57945		0.77896	0.00132		0.77896	0.0012
0.58748	0.28078		0.67616	0.22705		0.77995	0.00132		0.77995	0.0012
0.62843	0.41111		0.65882	0.44015		0.78095	0.00132		0.78095	0.0012
0.61845	0.42277		0.63581	0.40694		0.78194	0.00132		0.78194	0.0012
0.6062	0.30281		0.64547	1.1401		0.78293	0.00132		0.78293	0.0012
0.59433	0.31467		0.66699	0.2165		0.78392	0.00132		0.78392	0.0012
0.62119	0.25371		0.67276	0.60914		0.78491	0.00132		0.78491	0.0012
0.59209	0.24349		0.62464	0.37175		0.785	0.00132		0.785	0.0012
0.61582	0.30035		0.62549	0.24847		0.7859	0.00132		0.7859	0.0012
0.60282	0.28562		0.6403	0.50474		0.78689	0.00132		0.78689	0.0012
0.62123	0.41615		0.68726	0.27218		0.78788	0.00132		0.78788	0.0012
0.61657	0.43945		0.66709	0.21243		0.78887	0.00132		0.78887	0.0012
0.68715	0.21416		0.64608	0.35139		0.78986	0.00132		0.78986	0.0012
0.60879	0.72921		0.66887	0.36395		0.79086	0.00132		0.79086	0.0012
0.64352	0.23571		0.68558	0.25893		0.79185	0.00132		0.79185	0.0012
0.65967	0.20678		0.6575	0.95282		0.79284	0.00132		0.79284	0.0012
0.59597	0.21984		0.63999	0.58857		0.79383	0.00132		0.79383	0.0012
0.5871	0.21595		0.66849	0.33262		0.79482	0.00132		0.79482	0.0012
0.64892	0.26733		0.66684	0.2073		0.795	0.00132		0.795	0.0012
0.59471	0.43174		0.65709	0.26702		0.79581	0.00132		0.79581	0.0012
0.70655	0.20221		0.63644	0.2546		0.7968	0.00132		0.7968	0.0012
0.67643	0.46667		0.64751	0.47623		0.79779	0.00132		0.79779	0.0012
0.61149	0.44208		0.65103	1.07199		0.79878	0.00132		0.79878	0.0012
0.61396	0.37343		0.65808	0.35351		0.79977	0.00132		0.79977	0.0012
0.57134	0.35828		0.41673	0.23893		0.80077	0.00132		0.80077	0.0012
0.60027	0.44069		0.64873	0.2448		0.80176	0.00132		0.80176	0.0012
0.6184	0.39952		0.64348	1.24761		0.80275	0.00132		0.80275	0.0012
0.59343	0.30997		0.65843	0.4769		0.80374	0.00132		0.80374	0.0012
0.6059	0.29549		0.64997	0.67548		0.80473	0.00132		0.80473	0.0012
0.6178	0.39136		0.66831	0.30938		0.805	0.00132		0.805	0.0012
0.60216	0.74499		0.67832	0.20625		0.80572	0.00132		0.80572	0.0012
0.59783	0.41105		0.65746	0.49394		0.80671	0.00132		0.80671	0.0012
0.6005	0.20157		0.65653	1.17505		0.8077	0.00132		0.8077	0.0012
0.63108	0.32672		0.6664	0.22919		0.80869	0.00132		0.80869	0.0012
0.59948	0.61992		0.66006	0.77492		0.80968	0.00132		0.80968	0.0012
0.63088	0.49443		0.66327	0.43777		0.81068	0.00132		0.81068	0.0012
0.62874	0.54069		0.65512	0.61854		0.81167	0.00132		0.81167	0.0012
0.63773	0.30346		0.35329	0.20671		0.81266	0.00132		0.81266	0.0012
0.61985	0.69861		0.66053	0.3488		0.81365	0.00132		0.81365	0.0012
0.61681	0.31455		0.62013	1.08861		0.81464	0.00132		0.81464	0.0012
0.59106	0.20325		0.64984	0.78101		0.815	0.00132		0.815	0.0012
0.60628	0.3129		0.64136	1.04326		0.81563	0.00132		0.81563	0.0012
0.63252	0.23938		0.65047	0.59469		0.81662	0.00132		0.81662	0.0012
0.63101	0.2147		0.64878	0.38273		0.81761	0.00132		0.81761	0.0012
0.60901	0.2324		0.67696	0.23577		0.8186	0.00132		0.8186	0.0012
0.58297	0.43192		0.63276	0.97601		0.81959	0.00132		0.81959	0.0012
0.60658	0.26276		0.48776	0.25514		0.82059	0.00132		0.82059	0.0012
0.6066	0.52663		0.6767	0.32061		0.82158	0.00132		0.82158	0.0012
0.62263	0.43921		0.66997	0.74788		0.82257	0.00132		0.82257	0.0012
0.93549	0.25978		0.67887	0.3671		0.82356	0.00132		0.82356	0.0012
0.61382	0.39878		0.65929	0.39707		0.82455	0.00132		0.82455	0.0012
0.59822	0.22178		0.67107	0.35678		0.825	0.00132		0.825	0.0012
0.93717	0.28173		0.6273	0.83143		0.82554	0.00132		0.82554	0.0012
0.64028	0.20359		0.63575	0.55112		0.82653	0.00132		0.82653	0.0012
0.62442	0.40738		0.68493	0.22428		0.82752	0.00132		0.82752	0.0012
0.62797	0.39815		0.66983	0.38504		0.82851	0.00132		0.82851	0.0012
0.61078	0.2901		0.68354	0.22546		0.8295	0.00132		0.8295	0.0012
0.62282	0.53666		0.60736	0.21752		0.8305	0.00132		0.8305	0.0012
0.61468	0.25861		0.66297	0.30262		0.83149	0.00132		0.83149	0.0012
0.60738	0.42326		0.61545	0.67505		0.83248	0.00132		0.83248	0.0012
0.62814	0.33915		0.6047	0.82003		0.83347	0.00132		0.83347	0.0012
0.64165	0.283		0.61303	0.34984		0.83446	0.00132		0.83446	0.0012
0.60959	0.23889		0.64925	0.35214		0.835	0.00132		0.835	0.0012
0.63373	0.31846		0.65662	0.20169		0.83545	0.00132		0.83545	0.0012
0.62015	0.35963		0.6732	0.24018		0.83644	0.00132		0.83644	0.0012
0.62524	0.30693		0.57569	0.23994		0.83743	0.00132		0.83743	0.0012
0.6225	0.4193		0.66478	0.49299		0.83842	0.00132		0.83842	0.0012
0.66411	0.24168		0.66396	0.69063		0.83941	0.00132		0.83941	0.0012
0.61456	0.20418		0.65479	0.27995		0.84041	0.00132		0.84041	0.0012
0.6083	0.69174		0.66071	0.26815		0.8414	0.00132		0.8414	0.0012
0.60868	0.80387		0.65625	0.31438		0.84239	0.00132		0.84239	0.0012
0.6351	0.46694		0.62824	0.27964		0.84338	0.00132		0.84338	0.0012
0.61516	0.26041		0.64316	0.34487		0.84437	0.00132		0.84437	0.0012
0.63865	0.27009		0.6415	0.73051		0.845	0.00132		0.845	0.0012
0.61504	0.24631		0.6671	0.64057		0.84536	0.00132		0.84536	0.0012
0.62109	0.24239		0.63573	0.37567		0.84635	0.00132		0.84635	0.0012
0.62328	0.29808		0.62807	0.70844		0.84734	0.00132		0.84734	0.0012
0.58064	0.24262		0.64251	0.332		0.84833	0.00132		0.84833	0.0012
0.66079	0.24378		0.63274	0.41028		0.84932	0.00132		0.84932	0.0012
0.62345	0.23881		0.6765	0.53548		0.85032	0.00132		0.85032	0.0012
0.6101	0.58029		0.67774	0.52058		0.85131	0.00132		0.85131	0.0012
0.62333	0.33155		0.6295	0.2911		0.8523	0.00132		0.8523	0.0012
0.60516	0.41596		0.65898	0.60106		0.85329	0.00132		0.85329	0.0012
0.60854	0.37543		0.68225	0.2069		0.85428	0.00132		0.85428	0.0012
0.62003	0.73954		0.64724	0.20354		0.855	0.00132		0.855	0.0012
0.63433	0.71985		0.65279	0.36749		0.85527	0.00132		0.85527	0.0012
0.55614	0.23942		0.66796	0.27906		0.85626	0.00132		0.85626	0.0012
0.61811	0.49042		0.63994	0.2219		0.85725	0.00132		0.85725	0.0012
0.6237	0.38609		0.66347	0.36101		0.85824	0.00132		0.85824	0.0012
0.62429	0.30925		0.55662	0.20308		0.85923	0.00132		0.85923	0.0012
0.62038	0.29021		0.65027	0.29983		0.86023	0.00132		0.86023	0.0012
0.58579	0.30336		0.69718	0.20432		0.86122	0.00132		0.86122	0.0012
0.62141	0.62055		0.67233	0.33664		0.86221	0.00132		0.86221	0.0012
0.61473	0.71578		0.66953	0.26741		0.8632	0.00132		0.8632	0.0012
0.60195	0.2781		0.65661	0.56811		0.86419	0.00132		0.86419	0.0012
0.50963	0.80919		0.69638	0.22276		0.865	0.00132		0.865	0.0012
0.61872	0.31447		0.66469	0.37237		0.86518	0.00132		0.86518	0.0012
0.59807	0.20641		0.66711	0.23923		0.86617	0.00132		0.86617	0.0012
0.63337	0.51403		0.60167	1.23447		0.86716	0.00132		0.86716	0.0012
0.62532	0.64591		0.6594	0.40315		0.86815	0.00132		0.86815	0.0012
0.6104	0.40559		0.6528	0.57163		0.86914	0.00132		0.86914	0.0012
0.64224	0.21652		0.62587	0.30448		0.87014	0.00132		0.87014	0.0012
0.66425	0.24783		0.64887	0.3466		0.87113	0.00132		0.87113	0.0012
0.5471	0.37831		0.66171	0.25431		0.87212	0.00132		0.87212	0.0012
0.61445	0.21605		0.64389	0.56999		0.87311	0.00132		0.87311	0.0012
0.70937	0.29994		0.66627	0.42472		0.8741	0.00132		0.8741	0.0012
0.64288	0.25487		0.6315	0.29335		0.875	0.00132		0.875	0.0012
0.69043	0.23179		0.65157	0.61576		0.87509	0.00132		0.87509	0.0012
0.6606	0.39564		0.6379	0.56591		0.87608	0.00132		0.87608	0.0012
0.61882	0.48729		0.65584	0.47204		0.87707	0.00132		0.87707	0.0012
0.60487	0.43032		0.6269	0.29353		0.87806	0.00132		0.87806	0.0012
0.61817	0.23323		0.66005	0.26483		0.87905	0.00132		0.87905	0.0012
0.60052	0.66866		0.65916	0.68636		0.88005	0.00132		0.88005	0.0012
0.59813	0.3235		0.60922	0.62167		0.88104	0.00132		0.88104	0.0012
0.6016	0.54819		0.66309	0.387		0.88203	0.00132		0.88203	0.0012
0.63623	0.21258		0.64817	0.43366		0.88302	0.00132		0.88302	0.0012
0.60954	0.59868		0.6676	0.31857		0.88401	0.00132		0.88401	0.0012
0.59977	0.25986		0.64246	0.77159		0.885	0.00132		0.885	0.0012
0.61848	0.42801		0.61211	0.27645		0.885	0.00132		0.885	0.0012
0.62042	0.84976		0.65075	0.32874		0.88599	0.00132		0.88599	0.0012
0.61153	0.29078		0.67694	0.36935		0.88698	0.00132		0.88698	0.0012
0.61914	0.20715		0.65552	0.46749		0.88797	0.00132		0.88797	0.0012
0.61011	0.77435		0.63781	0.28432		0.88896	0.00132		0.88896	0.0012
0.58917	0.26296		0.64554	1.10339		0.88995	0.00132		0.88995	0.0012
0.61767	0.42931		0.6442	0.31039		0.89095	0.00132		0.89095	0.0012
0.59901	0.22762		0.63246	0.23122		0.89194	0.00132		0.89194	0.0012
0.67016	0.20586		0.63455	0.52914		0.89293	0.00132		0.89293	0.0012
0.62993	0.27187		0.66534	0.33696		0.89392	0.00132		0.89392	0.0012
0.8041	0.26229		0.65632	0.32764		0.89491	0.00132		0.89491	0.0012
0.60401	1.31093		0.64979	0.29788		0.895	0.00132		0.895	0.0012
0.62671	0.36611		0.67036	0.71412		0.8959	0.00132		0.8959	0.0012
0.60935	1.06377		0.66835	0.21473		0.89689	0.00132		0.89689	0.0012
0.60697	0.21022		0.66248	0.46864		0.89788	0.00132		0.89788	0.0012
0.64472	0.34967		0.65147	0.46228		0.89887	0.00132		0.89887	0.0012
0.60842	0.37031		0.64474	0.42117		0.89986	0.00132		0.89986	0.0012
0.61536	0.52684		0.64104	0.86053		0.90086	0.00132		0.90086	0.0012
0.56472	0.27829		0.67149	0.4725		0.90185	0.00132		0.90185	0.0012
0.61869	0.25506		0.64367	0.45525		0.905	0.00132		0.905	0.0012
0.57	0.48797		0.65825	0.54654		0.915	0.00132		0.915	0.0012
0.61676	0.26783		0.14782	1.89092		0.925	0.00132		0.925	0.0012
0.56912	0.26287		0.69319	0.20331		0.935	0.00132		0.935	0.0012
0.64883	0.22027		0.64996	0.55398		0.945	0.00132		0.945	0.0012
0.62598	0.23964		0.66268	0.22686		0.955	0.00132		0.955	0.0012
0.57948	0.22806		0.63642	0.32397		0.965	0.00132		0.965	0.0012
0.63088	0.48001		0.65232	0.54975		0.975	0.00132		0.975	0.0012
0.61552	0.29192		0.67664	0.2729		0.985	0.00132		0.985	0.0012
0.65316	0.28736		0.6734	0.43093		0.995	0.00132		0.995	0.0012
0.6339	0.30166		0.66254	0.61154
0.61327	0.20329		0.66849	0.22524
0.6165	0.39462		0.66285	0.3488
0.62349	0.39369		0.67063	0.22062
0.72888	0.20823		0.68071	0.34009
0.61888	0.48366		0.70038	0.2532
0.65547	0.2904		0.6551	0.43505
0.61025	0.46554		0.65473	0.29908
0.59854	0.97339		0.65453	0.48797
0.60268	0.5911		0.63575	0.64762
0.60963	0.73218		0.66823	0.39573
0.638	0.21384		0.64438	0.22786
0.58777	0.2819		0.6382	0.66339
0.6019	0.2548		0.63599	0.2091
0.61158	0.41717		0.65266	1.1874
0.81962	0.24527		0.67821	0.27916
0.61669	0.49996		0.67075	0.23994
0.54538	0.4729		0.67219	0.25287
0.60054	0.30746		0.66505	0.56713
0.57671	0.54401		0.66031	0.3518
0.64271	0.38463		0.66616	0.29114
0.59394	0.36451		0.62776	0.49253
0.50099	0.65928		0.65611	0.39015
0.61182	0.27061		0.6878	0.23209
0.60793	0.28762		0.65624	0.4476
0.62133	0.39185		0.66241	0.4001
0.64996	0.31964		0.62673	0.33145
0.63233	0.22356		0.67678	0.25106
0.60694	0.58183		0.64033	0.4064
0.60721	0.45291		0.64573	0.53226
0.60707	0.22725		0.54961	0.20113
0.58754	0.53278		0.63861	0.69503
0.59467	0.4478		0.67134	0.31944
0.64314	0.26757		0.67388	0.23754
0.5722	0.65225		0.66208	0.49017
0.6555	0.21805		0.62319	0.49499
0.56275	0.51113		0.6601	0.90424
0.62488	0.31801		0.67293	0.22504
0.56107	0.39479		0.63845	0.25264
0.61006	0.20175		0.64775	0.57275
0.63892	0.31009		0.59094	0.65384
0.63195	0.33478		0.64539	0.3044
0.64883	0.20711		0.63456	0.2917
0.64164	0.29278		0.64124	0.3625
0.60862	0.21649		0.65622	0.42163
0.63165	0.29057		0.66311	0.24257
0.62454	0.31911		0.63634	0.54936
0.66657	0.21736		0.6667	0.30165
0.60622	0.42037		0.64704	0.29182
0.60442	0.23036		0.65356	0.21549
0.60592	0.38661		0.64331	0.36457
0.62504	0.28743		0.65769	0.22787
0.62184	0.53073		0.6756	0.23312
0.61176	0.65544		0.64635	1.11061
0.63816	0.2517		0.65163	0.36592
0.59947	0.47149		0.6797	0.26863
0.61287	0.80984		0.67693	0.20199
0.64615	0.23809		0.58386	1.22785
0.60724	0.30733		0.64495	0.35821
0.60764	0.21512		0.57243	0.63552
0.62618	0.26389		0.66877	0.48638
0.61045	0.47264		0.67236	0.7647
0.62643	0.26356		0.66824	0.63293
0.62548	0.71017		0.66216	0.30927
0.60158	0.20466		0.65652	0.36666
0.59735	0.38059		0.66059	0.77129
0.6434	0.25577		0.67846	0.44903
0.6232	0.29814		0.66337	0.51476
0.61282	0.21022		0.68427	0.39883
0.53303	1.00019		0.68875	0.21964
0.61772	0.27682		0.6533	0.77586
0.62595	0.31967		0.6701	0.28319
0.59479	0.52037		0.62113	0.50755
0.62995	0.44093		0.64007	0.50681
0.61292	0.66077		0.68358	0.25349
0.60097	0.47042		0.65899	1.6743
0.63142	0.25077		0.63213	0.28669
0.60842	0.47115		0.65438	0.23321
0.63121	0.34029		0.67076	0.25514
0.61842	0.21536		0.63616	0.2587
0.64545	0.25843		0.65678	0.51883
0.63328	0.24633		0.64144	0.4319
0.63072	0.23564		0.66411	0.34598
0.59174	0.2512		0.40796	0.36674
0.83817	0.43189		0.63309	0.47599
0.61875	0.38692		0.64966	0.51827
0.60781	0.4235		0.66311	0.34614
0.60959	0.53519		0.64797	0.31198
0.63293	0.41974		0.6126	0.38054
0.6456	0.25109		0.64927	0.34093
0.62436	0.26269		0.67954	0.27705
0.56919	0.21204		0.66361	0.36445
0.60939	0.71577		0.62561	0.23157
0.60607	0.31023		0.67837	0.25651
0.598	0.52497		0.67616	0.50778
0.55962	0.25036		0.65862	0.32059
0.62452	0.25169		0.40119	0.43909
0.63745	0.47198		0.65488	0.73094
0.63705	0.22062		0.68772	0.20906
0.61078	0.66646		0.65278	0.27222
0.60472	0.25107		0.66135	0.49555
0.61493	0.54332		0.66598	0.56491
0.61989	0.44349		0.6417	0.21518
0.62061	0.29566		0.67299	0.21901
0.67969	0.20639		0.70162	0.20837
0.60788	0.92307		0.76058	0.22373
0.54071	0.23105		0.66675	0.51326
0.61027	0.39849		0.64877	0.30066
0.60951	0.34571		0.20937	0.50935
0.62567	0.30789		0.65865	0.25653
0.6463	0.21398		0.65006	0.76331
0.61177	0.24868		0.68118	0.46231
0.6148	0.25296		0.63857	0.62929
0.60917	0.39094		0.65833	0.6001
0.63507	0.23573		0.67201	0.29511
0.59377	0.29455		0.66134	0.23105
0.63028	0.32419		0.64658	0.50858
0.62398	0.21041		0.64819	0.23756
0.62016	0.30549		0.63069	0.2391
0.59341	0.25511		0.67828	0.27456
0.6565	0.97454		0.6669	0.36066
0.63879	0.21765		0.64908	0.32879
0.61226	1.19869		0.62713	1.14361
0.60438	0.42141		0.6632	0.57318
0.60721	0.39671		0.63741	0.48364
0.60361	0.51525		0.657	0.59581
0.59938	0.34012		0.65309	0.62678
0.64706	0.38497		0.64368	0.26944
0.62172	0.322		0.6774	0.27204
0.5948	0.33564		0.6424	0.40717
0.60503	0.23363		0.61404	2.25386
0.61478	0.32218		0.66987	0.25029
0.61855	0.40742		0.64504	0.50141
0.61975	0.32254		0.66685	0.27807
0.6318	0.40023		0.64911	0.23869
0.58009	0.44681		0.64051	0.55964
0.78719	0.29748		0.70623	0.24896
0.56671	0.73329		0.65876	0.33
0.60168	0.45966		0.65129	0.33971
0.56627	0.30101		0.55912	0.21446
0.62451	0.2848		0.68158	0.39747
0.56178	0.99287		0.60423	0.33891
0.62169	0.48734		0.64428	0.57593
0.59162	0.30409		0.6455	0.3723
0.63925	0.32764		0.61155	0.27523
0.62336	0.50282		0.6635	0.31238
0.62993	0.3267		0.66836	0.29129
0.6341	0.23494		0.65854	0.23825
0.63394	0.34805		0.67152	0.20751
0.62945	0.45769		0.64033	0.71371
0.61714	0.29413		0.66394	0.48432
0.10946	4.21877		0.66207	0.22438
0.63491	0.31963		0.66702	0.21081
0.62646	0.22717		0.68129	0.23295
0.60586	0.32679		0.65274	0.9079
0.63565	0.28591		0.54151	0.43563
0.74216	0.21044		0.65963	0.31251
0.62209	0.49038		0.66425	0.33855
0.60391	0.32296		0.61495	0.42468
0.60943	0.5152		0.64874	0.20784
0.56263	0.41901		0.6457	0.58017
0.64241	0.29126		0.66582	0.34106
0.5974	0.25106		0.65009	0.53873
0.72076	0.21253		0.63002	0.8468
0.60599	0.27504		0.67271	0.24315
0.59293	0.46751		0.87668	0.22574
0.59723	0.35126		0.69136	0.27298
0.60772	0.4439		0.63512	0.62721
0.6019	0.32161		0.65469	0.27952
0.63813	0.27192		0.64334	0.36667
0.63516	0.20152		0.68622	0.27115
0.60112	0.45584		0.66733	0.23933
0.60471	0.44305		0.66637	0.51475
0.62841	0.20251		0.66572	0.82818
0.52227	0.53869		0.65736	0.90786
0.61365	0.31412		0.67453	0.27186
0.6329	0.26571		0.65372	0.50982
0.61727	0.2223		0.6613	0.51203
0.62677	0.24556		0.62775	0.51838
0.60413	0.29856		0.65152	0.41339
0.62063	0.31355		0.67617	0.30337
0.6259	0.58756		0.66052	0.58753
0.62478	0.33052		0.64772	0.33509
0.62481	0.30143		0.65645	0.34037
0.63253	0.29843		0.64594	0.44008
0.58483	0.21027		0.6691	0.46599
0.62642	0.27863		0.66572	0.27735
0.59829	0.64418		0.65092	0.37185
0.61208	0.54879		0.58785	0.30727
0.59528	0.53273		0.62843	0.30924
0.62024	0.39179		0.65364	0.25158
0.6268	0.45534		0.62332	0.35408
0.60661	0.43541		0.65125	0.24582
0.58211	0.28571		0.66003	0.28244
0.6266	0.43041		0.67175	0.44853
0.63744	0.35355		0.63759	0.37062
0.56104	0.21416		0.66531	0.32678
0.62066	0.3385		0.69115	0.21621
0.57414	0.68335		0.67535	0.26786
0.6336	0.46848		0.64533	0.27933
0.55109	0.25875		0.65563	0.36628
0.60316	0.32488		0.6513	0.43987
0.62264	0.45955		0.64784	0.55268
0.60671	0.25735		0.65176	0.23293
0.62343	0.28292		0.64918	0.22451
0.68138	0.43498		0.65898	0.33692
0.61354	0.25581		0.24244	0.3913
0.72788	0.26467		0.69494	0.25324
0.62255	0.30696		0.6454	0.77387
0.6071	0.33529		0.64144	0.88275
0.61974	0.47195		0.61606	0.84539
0.61314	0.88412		0.65106	0.2361
0.63783	0.27628		0.65816	0.45187
0.62847	0.29581		0.67172	0.45118
0.62664	0.23404		0.64548	0.26642
0.6198	0.51834		0.64758	0.27013
0.61563	0.44909		0.62814	0.27964
0.66584	0.31461		0.6425	0.21926
0.61146	0.29055		0.64861	0.41353
0.52077	0.43025		0.63801	0.67513
0.59417	0.31763		0.6613	0.596
0.61514	0.39267		0.6643	0.71581
0.6416	0.22935		0.66416	0.25046
0.61625	0.53893		0.65204	0.46001
0.60704	0.42246		0.64174	0.89254
0.66162	0.30255		0.63379	0.24188
0.61196	0.34562		0.67549	0.25554
0.61541	0.59124		0.16916	0.49539
0.63192	0.39142		0.34505	0.53053
0.67673	0.45367		0.66541	0.26131
0.61762	0.40163		0.66768	0.38027
0.59416	0.20405		0.68831	0.2188
0.54526	0.22684		0.65324	0.26617
0.61295	0.5006		0.6525	0.68921
0.63868	0.25218		0.6756	0.32655
0.62764	0.37055		0.65231	0.45354
0.61666	1.00025		0.66266	0.50971
0.63776	0.24697		0.66297	0.25222
0.64669	0.22665		0.64584	0.29882
0.61257	0.37208		0.66232	0.29179
0.61325	0.69946		0.65825	0.40772
0.61166	0.22066		0.65063	0.36604
0.56833	0.50189		0.65313	0.28627
0.61681	0.24808		0.66258	0.49994
0.62508	0.28245		0.66446	0.33742
0.62192	0.53089		0.67629	0.28021
0.62811	0.59108		0.66162	0.37559
0.67437	0.24848		0.65033	0.9591
0.6127	0.56626		0.64408	0.85946
0.62201	0.37986		0.63983	0.68079
0.67074	0.21093		0.64383	0.45819
0.60116	0.29837		0.69287	0.27754
0.6359	0.23489		0.64379	0.44944
0.63376	0.43986		0.64885	1.22177
0.62537	0.84747		0.64136	0.21886
0.60807	0.41355		0.67442	0.22133
0.6186	0.33311		0.65408	0.30454
0.63429	0.442		0.55371	0.30239
0.61138	0.40075		0.63152	0.42928
0.62723	0.3433		0.65309	0.70743
0.63116	0.20242		0.63049	0.7455
0.64715	0.28884		0.64542	0.38771
0.60738	0.31643		0.63124	0.54055
0.61966	0.53182		0.66242	0.68642
0.58675	1.76249		0.65687	0.20504
0.55263	0.69937		0.64975	0.43689
0.62237	0.33358		0.63081	0.32256
0.60972	0.37015		0.65271	0.48603
0.5958	0.4365		0.65003	0.49425
0.63061	0.23457		0.6705	0.30416
0.60723	0.23188		0.64933	0.33205
0.61274	0.96665		0.45584	0.5836
0.49535	0.23232		0.65158	0.35225
0.57093	0.6592		0.6273	0.66921
0.56251	0.50795		0.50291	0.29178
0.59596	0.31137		0.65272	0.79885
0.62112	0.25976		0.43196	0.42937
0.57938	0.23165		0.56809	0.42542
0.63233	0.38563		0.38436	0.2149
0.62771	0.3914		0.68317	0.4848
0.61365	0.29962		0.65473	0.62771
0.61997	0.46381		0.64651	0.34228
0.61155	0.28557		0.6318	0.76895
0.63155	0.47869		0.66882	0.26953
0.59341	0.29684		0.64614	0.39657
0.62864	0.26244		0.67038	0.22014
0.61746	0.21945		0.65832	0.21472
0.57035	2.32453		0.6398	0.52856
0.62652	0.20231		0.64008	0.45737
0.60602	0.3079		0.63174	0.67009
0.63341	0.28269		0.63726	0.57568
0.66264	0.27169		0.65444	1.2415
0.63073	0.54668		0.64981	0.57842
0.62579	0.41886		0.64677	0.40068
0.6173	0.27717		0.64948	0.31608
0.62788	0.37655		0.65785	0.25233
0.57544	0.26914		0.68543	0.32198
0.62976	0.311		0.60168	0.62875
0.64576	0.25827		0.66688	0.23612
0.59549	0.22758		0.64224	0.55569
0.60446	0.45675		0.66695	0.26745
0.5976	0.31548		0.63684	0.58036
0.58944	0.23326		0.66703	0.34415
0.62172	0.41994		0.6716	0.31969
0.63538	0.20144		0.6554	0.2043
0.59048	0.20955		0.68524	0.26509
0.61349	0.23053		0.67111	0.43745
0.62138	0.20948		0.60059	1.16596
0.61131	0.48094		0.43972	0.49488
0.57919	1.27035		0.63822	0.44501
0.60939	0.32495		0.6686	0.25382
0.61717	0.22164		0.6523	0.32802
0.61864	0.20755		0.62821	0.20789
0.60879	0.33098		0.67202	0.50047
0.61226	0.24391		0.63416	0.4375
0.67765	0.21181		0.67079	0.21055
0.6274	0.40662		0.64802	0.4431
0.55765	0.83509		0.65578	0.22926
0.64318	0.21747		0.67589	0.36066
0.62709	0.27248		0.63023	0.49448
0.61851	0.734		0.63364	0.36914
0.63053	0.39502		0.68169	0.25214
0.61104	0.24032		0.66287	0.27148
0.61582	0.29991		0.66076	0.27597
0.61342	0.2593		0.63857	0.33316
0.61622	0.59063		0.64897	0.38096
0.62554	0.43809		0.66689	0.34283
0.6177	0.29215		0.65042	0.66703
0.92728	0.25344		0.6436	0.32882
0.62486	0.3394		0.62705	1.74745
0.69176	0.30612		0.67792	0.20805
0.71726	0.23204		0.68448	0.28016
0.63007	0.31645		0.66297	0.47619
0.64489	0.26652		0.68035	0.32336
0.63628	0.42867		0.6719	0.25058
0.61298	0.22318		0.65529	1.02322
0.61252	0.24406		0.63587	0.70084
0.64067	0.24353		0.67752	0.2044
0.62022	0.20416		0.67153	0.21481
0.61563	0.89199		0.66699	0.21721
0.67341	0.20324		0.65277	0.20863
0.6079	0.23691		0.45888	0.3252
0.61061	0.30993		0.63422	0.66524
0.6243	0.7493		0.671	0.22713
0.64185	0.28826		0.63895	0.41361
0.63419	0.24186		0.63996	0.76702
0.61466	0.42153		0.64731	0.88347
0.60092	0.32715		0.62804	0.27092
0.60234	0.2819		0.65329	0.22914
0.60522	0.52969		0.67919	0.28291
0.60774	0.33625		0.65932	0.52498
0.62975	0.42027		0.65703	0.2146
0.62176	0.23291		0.64492	0.40562
0.6048	0.35564		0.60421	0.24582
0.60005	0.53489		0.65961	0.31583
0.62582	0.30284		0.66167	0.315
0.61992	0.22323		0.42286	0.21671
0.61738	0.31419		0.67041	0.50042
0.62327	0.2109		0.65831	0.29433
0.62341	0.21638		0.66734	0.23724
0.68592	0.21558		0.64409	0.47481
0.62683	0.42721		0.66068	0.21218
0.59896	0.48767		0.67911	0.27579
0.60821	0.26368		0.6696	0.25906
0.60418	0.54688		0.66741	0.21224
0.64444	0.24343		0.65631	0.58809
0.59403	0.27527		0.68083	0.2064
0.61745	0.29592		0.64825	0.75982
0.64638	0.21097		0.65546	0.50533
0.62655	0.46704		0.64879	0.83682
0.59307	0.62667		0.67703	0.46471
0.60685	0.2706		0.66828	0.29658
0.59858	0.66795		0.67859	0.33086
0.58212	0.5904		0.61286	0.28207
0.61299	0.20325		0.64206	0.53374
0.63273	0.23178		0.64906	0.20261
0.60892	0.42985		0.65685	0.30702
0.63456	0.28368		0.55957	0.8151
0.60293	0.23611		0.65581	0.48758
0.63417	0.25329		0.58219	0.8628
0.60018	1.01287		0.64538	0.86326
0.61067	0.26583		0.64579	1.69865
0.62943	0.22257		0.65896	0.6683
0.60907	0.54351		0.692	0.29801
0.64577	0.27178		0.6498	0.56837
0.61331	0.31947		0.63456	0.6963
0.64091	0.21994		0.6468	0.35144
0.60827	0.32784		0.67917	0.29833
0.61448	0.22713		0.66378	0.25476
0.61832	0.21409		0.64131	0.28717
0.62277	0.39236		0.66116	0.20393
0.62899	0.41078		0.67308	0.27407
0.62996	0.35155		0.6458	0.27295
0.64539	0.21123		0.66626	0.45161
0.62325	0.38131		0.66402	0.20008
0.55598	0.75896		0.65416	0.31061
0.63191	0.29016		0.63408	0.21524
0.63103	0.4189		0.66715	0.35368
0.57978	0.24901		0.65229	0.62198
0.6001	0.22633		0.6669	0.62467
0.61535	0.36218		0.6513	0.39448
0.60478	0.44006		0.65005	0.51273
0.62743	0.92117		0.65814	0.2215
0.62956	0.21976		0.64159	0.34741
0.62511	0.47637		0.67537	0.35801
0.56635	0.23401		0.62633	0.23927
0.61322	0.57428		0.66082	1.17287
0.61773	0.40486		0.62661	0.54388
0.54018	0.23132		0.64591	0.29436
0.61614	0.48627		0.63046	0.51897
0.61552	0.52305		0.64721	0.29283
0.58916	0.35118		0.66469	0.29251
0.63415	0.36636		0.64037	0.4803
0.60109	0.20422		0.63663	0.36116
0.57822	0.21874		0.65618	0.60539
0.6168	0.31524		0.62219	0.28208
0.59952	0.21866		0.65969	0.29083
0.60521	0.49055		0.67154	0.51538
0.59512	0.27991		0.66095	0.41957
0.75677	0.21071		0.65726	0.76747
0.60895	0.34361		0.65621	0.54006
0.59252	0.25331		0.63124	0.58137
0.63148	0.4261		0.65549	0.30683
0.60266	0.23896		0.66143	0.21083
0.61134	0.29146		0.64281	0.24834
0.59848	0.37958		0.6468	1.18455
0.60673	0.27168		0.62718	0.22346
0.67677	0.21574		0.65005	0.22207
0.60263	0.65593		0.65661	0.76605
0.58549	0.31625		0.66343	0.2869
0.61459	0.25997		0.66117	0.28719
0.66702	0.27824		0.67451	0.34577
0.61609	0.32773		0.62047	0.46438
0.67018	0.2154		0.75264	0.31729
0.43747	0.29465		0.67647	0.3083
0.62535	0.27237		0.65287	0.26042
0.62113	0.23938		0.66814	0.43325
0.6358	0.24631		0.66967	0.28032
0.61704	0.31787		0.63959	0.27178
0.65315	0.21816		0.46443	0.23448
0.63489	0.28723		0.66084	0.35767
0.59338	0.28283		0.66584	0.26479
0.60484	0.35232		0.65736	0.55769
0.61943	0.46561		0.65508	0.23536
0.62248	0.84677		0.69445	0.29036
0.62859	0.23534		0.66729	0.27517
0.56864	1.10731		0.67048	0.23245
0.58111	0.22714		0.66958	0.22092
0.63764	0.58671		0.6637	0.26327
0.61524	0.35882		0.65048	0.20734
0.61864	0.37872		0.65431	0.3016
0.63403	0.49034		0.67162	0.20662
0.60727	0.29974		0.63339	0.65402
0.61868	0.43462		0.64916	0.47567
0.62132	0.33648		0.67165	1.03005
0.60766	0.48282		0.65382	0.8691
0.58093	0.2142		0.64657	0.34369
0.55861	0.37965		0.67911	0.20498
0.67204	0.22967		0.65744	0.29948
0.62333	0.30375		0.63522	0.33318
0.62439	0.21357		0.66446	0.4125
0.62006	0.61968		0.65892	0.38916
0.922	0.20783		0.66095	0.31242
0.62562	0.29631		0.69617	0.22623
0.62518	0.3754		0.63264	0.37536
0.59022	0.36044		0.67326	0.98671
0.62164	0.33919		0.65309	0.25229
0.60288	0.24726		0.66309	0.40682
0.61406	0.20273		0.65643	0.38186
0.6453	0.31014		0.65691	0.38499
0.56349	0.27368		0.67129	0.24281
0.66473	0.24265		0.67161	0.20445
0.63299	0.21106		0.6712	0.23821
0.63571	0.33675		0.62709	0.5202
0.61867	0.33581		0.66373	0.59861
0.6217	0.30265		0.67758	0.37444
0.63684	0.24496		0.66287	0.33301
0.61885	0.20504		0.64865	0.89026
0.6249	0.44246		0.6581	0.43787
0.6323	0.40656		0.64941	0.6209
0.61108	0.2362		0.636	0.67084
0.59821	0.4391		0.63773	0.47913
0.62881	0.21906		0.60938	0.36316
0.61999	0.38325		0.66059	0.30223
0.61633	0.23575		0.65665	0.29462
0.62481	0.29189		0.65401	0.38303
0.61846	0.22629		0.6751	0.58374
0.65645	0.20835		0.68131	0.25154
0.6152	0.45513		0.66029	0.40114
0.62705	0.38723		0.65175	0.32597
0.6501	0.21047		0.65852	0.91453
0.61747	0.28898		0.67252	0.31993
0.62754	0.39166		0.64689	0.61096
0.6301	0.25498		0.66156	0.27018
0.70434	0.35919		0.58882	0.49861
0.65043	0.24371		0.65735	0.25802
0.62375	0.45289		0.66998	0.32989
0.64781	0.25041		0.68371	0.20394
0.61115	0.71528		0.65397	0.42929
0.61487	0.49192		0.66044	0.28961
0.61951	0.93629		0.63354	0.46264
0.61862	0.33509		0.64769	0.44467
0.6176	0.31902		0.66008	0.63899
0.61651	0.24308		0.6472	0.65947
0.59618	0.70603		0.66844	0.20553
0.63875	0.26247		0.67758	0.35248
0.60609	0.37482		0.6843	0.21076
0.55465	0.42743		0.65776	0.39133
0.62122	0.22778		0.67565	0.26708
0.59053	0.28043		0.36403	0.71816
0.63876	0.32017		0.62564	0.2051
0.61777	0.26853		0.50688	0.22363
0.6207	0.4982		0.51048	1.30326
0.61142	0.22771		0.68328	0.22498
0.59593	0.22349		0.6773	0.35057
0.6522	0.29859		0.65194	0.2834
0.61604	0.63955		0.5942	0.70522
0.57024	0.57604		0.6396	0.30874
0.70699	0.25861		0.66916	0.3865
0.55783	0.21405		0.61312	0.31617
0.58938	0.23399		0.64316	0.90585
0.6306	0.23927		0.65536	0.37566
0.65082	0.20435		0.6492	0.50853
0.66141	0.23435		0.69895	0.21526
0.68439	0.28006		0.6482	0.39353
0.62456	0.25003		0.66088	0.39639
0.61561	0.27622		0.67975	0.31897
0.62391	0.32234		0.64923	0.59163
0.62007	0.21087		0.65204	0.48113
0.61653	0.28279		0.66014	0.20047
0.64273	0.27344		0.66837	0.3444
0.83052	0.36734		0.64199	0.47245
0.96149	0.33235		0.61235	0.76838
0.62619	0.21424		0.6888	0.20383
0.6234	0.68693		0.66828	0.44009
0.61154	0.44689		0.66198	0.2989
0.57441	0.23138		0.43127	0.39893
0.95434	0.24403		0.61767	0.39536
0.62558	0.30679		0.67303	0.57602
0.65747	0.24955		0.64565	0.22368
0.65534	0.20832		0.68695	0.44464
0.62985	0.37584		0.66669	0.37213
0.61356	0.40533		0.66925	0.73715
0.63003	0.27507		0.67831	0.22252
0.64671	0.33167		0.67392	0.24097
0.64152	0.20822		0.66561	0.23243
0.62059	0.40925		0.65929	0.40206
0.4932	0.27224		0.60859	0.21936
0.60348	0.21847		0.65349	1.07044
0.61031	0.4304		0.64551	0.34397
0.59588	0.25335		0.64828	0.30686
0.55908	0.50771		0.65821	0.32844
0.60745	0.3763		0.67216	0.30412
0.62453	0.34909		0.64469	1.0275
0.62478	0.3355		0.57345	0.3411
0.56299	0.31845		0.67029	0.2344
0.69249	1.28429		0.65128	0.41289
0.61748	0.70866		0.57235	0.35472
0.65481	0.28685		0.64566	0.63559
0.59397	0.50712		0.63803	0.6137
0.60422	0.2887		0.61098	0.23447
0.60426	0.41466		0.67993	0.24353
0.61668	0.42806		0.65871	0.58339
0.61512	0.56031		0.61806	0.42845
0.62136	0.42075		0.6593	0.45685
0.66039	0.20738		0.65762	0.23305
0.62342	0.25891		0.68698	0.2282
0.61046	0.51288		0.67611	0.23461
0.61311	0.66784		0.67242	0.23669
0.62568	0.33721		0.64921	0.73689
0.66284	0.24256		0.63178	0.33435
0.59731	0.2277		0.65344	0.43823
0.62475	0.2094		0.5616	0.60049
0.59884	0.2952		0.6771	0.26623
0.60629	0.46054		0.67074	0.41205
0.61506	0.28134		0.64718	1.13988
0.61164	0.4998		0.67488	0.20087
0.54302	0.29478		0.64894	0.36941
0.68878	0.31455		0.65008	0.5267
0.60758	0.21483		0.63519	0.38253
0.66744	0.20319		0.65424	0.44205
0.62698	0.35217		0.61593	0.28542
0.60999	0.52098		0.63146	0.24835
0.64039	0.24963		0.65836	0.53491
0.63407	0.37968		0.62949	1.37385
0.64435	0.29063		0.65527	0.4337
0.62778	0.22885		0.14281	13.0273
0.62576	0.31887		0.64418	0.30495
0.67007	0.23842		0.6722	0.34363
0.58073	0.30021		0.64697	0.7161
0.58879	0.29628		0.6364	0.28624
0.62457	0.32269		0.62876	0.38211
0.6433	0.36811		0.62911	0.25974
0.59163	0.35955		0.66289	1.03717
0.64273	0.30801		0.6638	0.21787
0.61439	0.39509		0.66985	0.43703
0.63199	0.20809		0.63423	0.60431
0.61537	0.326		0.64753	0.37897
0.64729	0.37458		0.65004	0.61282
0.5993	0.25768		0.63338	0.62906
0.6131	0.42215		0.62299	0.46132
0.61714	0.2327		0.64722	0.66509
0.6227	0.24012		0.67682	0.36498
0.63425	0.35996		0.65942	0.49772
0.64363	0.3037		0.68797	0.34432
0.59024	0.30687		0.66223	0.39252
0.62728	0.2994		0.66012	0.24256
0.54008	0.28172		0.67933	0.24403
0.60398	0.21972		0.67084	0.29401
0.61573	0.45903		0.6419	0.61717
0.61687	0.37603		0.63641	0.34247
0.5746	0.278		0.65372	0.8501
0.62501	0.25532		0.645	0.29066
0.62649	0.42752		0.65416	0.3409
0.62847	0.2672		0.65459	0.22905
0.59419	0.33369		0.64437	0.2447
0.63617	0.34444		0.60342	1.08498
0.62107	0.24291		0.60997	0.50887
0.63904	0.21567		0.66108	0.33036
0.62239	0.82926		0.65718	0.31291
0.63207	0.32714		0.67179	0.27809
0.68545	0.21008		0.66145	0.47865
0.6375	0.21353		0.64207	0.70059
0.60567	0.38994		0.64911	0.5596
0.59013	0.26362		0.63861	0.26954
0.61338	0.23498		0.62861	1.19261
0.61543	0.48016		0.6489	0.30447
0.61772	0.21883		0.63529	0.26779
0.62982	0.51427		0.66005	0.42197
0.61878	0.251		0.65442	0.20914
0.62484	0.59166		0.6572	0.22136
0.64009	0.28897		0.64771	0.50451
0.61927	0.29099		0.65306	0.54937
0.6873	0.20705		0.65385	0.34542
0.59417	0.41134		0.47101	0.30368
0.61831	0.42327		0.66011	0.69631
0.63274	0.75151		0.47281	0.24538
0.61287	0.23959		0.66849	0.40972
0.63627	0.28256		0.62582	0.65535
0.59475	1.3372
0.63702	0.46648
0.6185	0.28503
0.61011	0.56054
0.58741	0.3315
0.62189	0.7077
0.89266	0.22633
0.62946	0.42778
0.59415	0.8448
0.64005	0.2904
0.56619	0.29642
0.55326	0.39396
0.61134	0.44043
0.63582	0.40356
0.61134	0.64345
0.60072	1.35119
0.63493	0.98095
0.57965	0.23038
0.64356	0.33082
0.59184	0.29492
0.63694	0.41644
0.56098	0.62735
0.66344	1.15674
0.62871	0.29588
0.6306	0.20746
0.63663	0.2264
0.59121	0.20607
0.59598	0.27614
0.62138	0.27471
0.64079	0.25629
0.60771	0.3893
0.62655	0.2479
0.66433	0.25516
0.61857	0.23442
0.60616	0.57999
0.59967	0.31959
0.60227	0.20001
0.6068	0.28278
0.57447	0.3073
0.60755	1.41362
0.6202	0.24834
0.78501	0.20494
0.62844	0.37336
0.60737	0.21499
0.56752	0.21637
0.61381	0.30768
0.6324	0.22615
0.62905	0.25201
0.64929	0.25333
0.6032	0.64011
0.5898	0.44223
0.80046	0.37596
0.62738	0.30025
0.64428	0.34716
0.60926	0.20098
0.64291	0.28619
0.65196	0.22337
0.6217	0.51108
0.62046	0.38017
0.61012	0.24743
0.59767	0.24268
0.62276	0.33241
0.54839	0.3079
0.62297	0.20343
0.6109	0.35556
0.60063	0.23145
0.62076	0.3919
0.60174	0.48301
0.62148	0.81111
0.62597	0.44664
0.61338	0.30697
0.59191	0.28926
0.62808	0.38344
0.65093	0.35763
0.59013	0.87926
0.62228	0.58395
0.62928	0.25028
0.61316	0.69106
0.61205	0.35838
0.61178	0.37345
0.59302	0.27302
0.83688	0.25479
0.61364	0.30401
0.60782	0.34653
0.72996	0.44726
0.60858	1.00798
0.61633	0.54342
0.60054	0.3227
0.60257	1.10328
0.60956	0.36678
0.63866	0.23462
0.92445	0.24266
0.67496	0.20501
0.58937	0.50552
0.61447	0.25584
0.64675	0.4673
0.62314	0.21399
0.62375	0.51572
0.62247	0.47578
0.61211	0.22674
0.65947	0.20768
0.59109	0.53859
0.56927	0.24317
0.60935	0.28752
0.65404	0.30929
0.60714	0.21626
0.63804	0.24293
0.60917	0.44381
0.61355	0.22356
0.59147	0.22286
0.59937	0.29258
0.614	0.37909
0.63366	0.68016
0.60389	0.39151
0.60286	0.28616
0.60022	0.32653
0.55899	0.20402
0.61745	0.56191
0.61612	0.27057
0.62732	0.20265
0.59749	0.29908
0.57164	0.44324
0.89594	0.22643
0.65435	0.27692
0.60968	0.54454
0.5207	0.78598
0.64586	0.2216
0.64343	0.28363
0.63628	0.23837
0.62226	0.47375
0.57489	0.51731
0.64046	0.75425
0.63231	0.37506
0.6304	0.29362
0.53211	0.35644
0.60469	0.34133
0.65574	0.21311
0.59481	0.34152
0.63973	0.24665
0.62387	0.32589
0.61583	0.55206
0.47703	0.30357
0.59734	0.20711
0.62263	0.26111
0.61712	0.27472
0.59975	0.4124
0.65328	0.25101
0.62184	0.70335
0.62347	0.41083
0.63346	0.33056
0.62097	0.20714
0.60019	0.34684
0.62441	0.20325
0.56973	0.24271
0.61108	0.29964
0.60203	0.23122
0.629	0.26718
0.59323	0.40697
0.57297	0.20339
0.62968	0.21036
0.60759	0.42262
0.62412	0.49524
0.62658	0.27453
0.62315	0.31499
0.62147	0.21695
0.61631	0.3476
0.62586	0.2672
0.63113	0.38295
0.61131	0.20683
0.60943	0.41515
0.61339	0.79926
0.60572	0.211
0.63295	0.23476
0.66878	0.3153
0.66038	0.20711
0.62993	0.25162
0.60545	0.55811
0.63978	0.25501
0.61377	0.77432
0.61665	0.35458
0.59973	0.92982
0.61153	0.60183
0.60894	0.42792
0.61372	0.20286
0.60364	0.2672
0.54647	0.27235
0.59523	0.3017
0.62524	0.59458
0.62389	0.20062
0.56762	0.21916
0.62595	0.25892
0.5702	0.25923
0.61872	0.34382
0.60636	0.57456
0.62068	0.43572
0.61999	0.4002
0.60367	0.22948
0.61578	0.89125
0.62892	0.62335
0.61668	0.49162
0.60196	0.23305
0.6101	0.49534
0.65253	0.24675
0.62126	0.30622
0.63429	0.28262
0.60595	0.48431
0.58808	0.34826
0.58842	0.20341
0.61524	0.54911
0.62857	0.44682
0.5882	0.20252
0.54885	0.72765
0.63846	0.21892
0.62713	0.42639
0.5743	0.48766
0.60344	0.49598
0.55756	0.30012
0.622	0.23155
0.62374	0.23134
0.61481	0.364
0.61028	0.61478
0.63152	0.24326
0.58193	0.26261
0.62199	0.34682
0.66881	0.20036
0.60256	0.67679
0.61645	0.24442
0.59286	0.32679
0.60407	0.21082
0.94428	0.20778
0.61086	0.38305
0.63866	0.2185
0.59845	0.36369
0.62393	0.81064
0.61071	0.53924
0.60974	0.24904
0.62018	0.3944
0.62938	0.23088
0.62768	0.20737
0.63483	0.27868
0.54788	0.23018
0.60455	0.38331
0.62459	0.20179
0.54957	0.44293
0.61477	0.237
0.65032	0.24734
0.61723	0.25542
0.6012	0.27571
0.60409	0.64863
0.58691	0.90369
0.56554	0.37692
0.60603	0.31504
0.62646	0.24894
0.64629	0.23228
0.59102	0.24764
0.60087	0.3518
0.62285	0.29798
0.60158	0.36263
0.61346	0.38256
0.6283	0.5533
0.58739	0.48747
0.62596	0.27295
0.63532	0.23261
0.6405	0.28725
0.58626	0.33851
0.64039	0.34678
0.57914	0.23266
0.63045	0.32766
0.62179	0.40826
0.5598	0.24609
0.60569	0.24207
0.61522	0.67604
0.63418	0.2554
0.66	0.2619
0.58692	0.3965
0.61764	0.26637
0.61436	0.3585
0.6112	0.67447
0.57895	0.42285
0.63479	0.30325
0.6222	0.28049
0.62432	0.22536
0.61893	0.47237
0.62093	0.51038
0.63571	0.3397
0.65184	0.22774
0.61603	0.22388
0.65989	0.21584
0.64935	0.24283
0.65215	0.20156
0.61878	0.21124
0.63194	0.27593
0.61984	0.48265
0.63551	0.51353
0.62271	0.31774
0.60969	0.51598
0.62113	0.41203
0.59973	0.43824
0.61505	0.27097
0.57149	0.40211
0.62624	0.52615
0.60472	0.55845
0.61786	0.24506
0.63592	0.2264
0.6071	0.62962
0.60385	0.77607
0.69581	0.2309
0.60848	0.42459
0.61011	0.28207
0.60038	0.97462
0.60556	0.30592
0.62017	0.44971
0.63718	0.21125
0.54384	0.36739
0.60979	0.30589
0.68832	0.27258
0.56869	0.49082
0.62988	0.96706
0.63509	0.43892
0.64218	0.21127
0.61265	0.20318
0.62838	0.38349
0.60333	0.24331
0.79333	0.26855
0.60411	0.38394
0.63436	0.35128
0.62007	0.24092
0.59529	0.41934
0.61782	0.72585
0.56025	0.41473
0.61314	0.5635
0.61952	0.29195
0.59891	0.55765
0.62021	0.21512
0.64142	0.34776
0.62234	0.35573
0.91604	0.20629
0.6008	0.219
0.63588	0.25952
0.56598	0.49953
0.61861	0.41069
0.59376	0.41382
0.62643	0.63955
0.66356	0.27145
0.62846	0.58634
0.61568	0.36247
0.62057	0.31145
0.61068	0.45582
0.66439	0.39816
0.6335	0.95097
0.62645	0.24372
0.61783	0.51872
0.61991	0.71043
0.62985	0.24912
0.62544	0.36243
0.60935	0.74139
0.56341	0.31566
0.5855	0.21882
0.6313	0.22264
[truncated: 2,347 more rows]

## Sheet: Fig. 2g
H41-10			H41-10R3(Cit)			Gaussian-fitting for H41-10			Gaussian-fitting for H41-10R3(Cit)			Mean Ib1/Io	Mean Ib2/Io	W1, h/2	W2, h/2	Rs
BlockDepth	Restime (ms)		BlockDepth	Restime (ms)		BlockDepth	Relative counts		BlockDepth	Relative counts		0.63929	0.66477	0.03004	0.03073	0.49328
0.6286	1.77447		0.66976	0.25586		0.005	0.00156		0.005	0.00123
0.6382	0.41886		0.64978	0.53525		0.00698	0.00156		0.00698	0.00123		K238Q
0.64065	0.72774		0.6382	0.84336		0.00797	0.00156		0.00797	0.00123
0.62889	2.55976		0.62626	1.50712		0.00896	0.00156		0.00896	0.00123
0.62381	0.41499		0.61326	0.35558		0.00995	0.00156		0.00995	0.00123
0.63099	5.59135		0.67066	0.76148		0.01095	0.00156		0.01095	0.00123
0.63032	1.56816		0.657	0.53178		0.01194	0.00156		0.01194	0.00123
0.82581	0.28924		0.48003	0.27136		0.01293	0.00156		0.01293	0.00123
0.6232	1.43219		0.65071	0.66918		0.01392	0.00156		0.01392	0.00123
0.61862	2.40723		0.66958	0.77877		0.01491	0.00156		0.01491	0.00123
0.62529	1.62306		0.61033	0.53575		0.015	0.00156		0.015	0.00123
0.1858	0.95109		0.22846	35.8937		0.0159	0.00156		0.0159	0.00123
0.63893	0.94689		0.68393	0.45468		0.01689	0.00156		0.01689	0.00123
0.55049	1.4132		0.64916	0.97527		0.01788	0.00156		0.01788	0.00123
0.62421	1.124		0.65954	0.37947		0.01887	0.00156		0.01887	0.00123
0.62655	0.50366		0.65628	1.51208		0.01986	0.00156		0.01986	0.00123
0.62426	3.73417		0.66126	0.94825		0.02086	0.00156		0.02086	0.00123
0.61912	2.73823		0.67716	0.21935		0.02185	0.00156		0.02185	0.00123
0.63119	1.20556		0.70672	0.36687		0.02284	0.00156		0.02284	0.00123
0.57632	7.20377		0.67782	0.27754		0.02383	0.00156		0.02383	0.00123
0.6053	0.46744		0.65306	0.67388		0.02482	0.00156		0.02482	0.00123
0.63695	3.40269		0.67636	0.42955		0.025	0.00156		0.025	0.00123
0.62488	2.69455		0.68647	0.83588		0.02581	0.00156		0.02581	0.00123
0.615	3.15993		0.66373	0.83567		0.0268	0.00156		0.0268	0.00123
0.63264	2.54775		0.68337	0.2575		0.02779	0.00156		0.02779	0.00123
0.6336	0.51252		0.35961	0.36303		0.02878	0.00156		0.02878	0.00123
0.63342	1.26982		0.65483	0.29211		0.02977	0.00156		0.02977	0.00123
0.65408	0.42612		0.65213	0.5643		0.03077	0.00156		0.03077	0.00123
0.62449	0.52437		0.64805	1.40047		0.03176	0.00156		0.03176	0.00123
0.64773	0.33507		0.66719	2.23565		0.03275	0.00156		0.03275	0.00123
0.62558	1.96304		0.64652	0.37844		0.03374	0.00156		0.03374	0.00123
0.57556	2.51318		0.64988	2.03382		0.03473	0.00156		0.03473	0.00123
0.62402	0.67582		0.66378	0.83524		0.035	0.00156		0.035	0.00123
0.63249	1.10109		0.68134	0.26711		0.03572	0.00156		0.03572	0.00123
0.63189	1.22891		0.67487	0.20146		0.03671	0.00156		0.03671	0.00123
0.61866	1.93609		0.6524	2.19445		0.0377	0.00156		0.0377	0.00123
0.71344	0.32379		0.65189	0.34592		0.03869	0.00156		0.03869	0.00123
0.63119	0.45525		0.65904	0.91079		0.03968	0.00156		0.03968	0.00123
0.63038	0.32712		0.61821	0.34388		0.04068	0.00156		0.04068	0.00123
0.63514	0.99337		0.61609	0.30285		0.04167	0.00156		0.04167	0.00123
0.61664	1.22153		0.65879	0.28446		0.04266	0.00156		0.04266	0.00123
0.62305	0.38845		0.63886	0.36679		0.04365	0.00156		0.04365	0.00123
0.61978	2.65085		0.65532	0.56288		0.04464	0.00156		0.04464	0.00123
0.65774	0.21498		0.66223	1.06666		0.045	0.00156		0.045	0.00123
0.63942	0.37131		0.65502	0.36985		0.04563	0.00156		0.04563	0.00123
0.65821	0.89704		0.65073	2.29852		0.04662	0.00156		0.04662	0.00123
0.64358	0.22289		0.65095	1.37458		0.04761	0.00156		0.04761	0.00123
0.63208	1.14331		0.64452	0.3038		0.0486	0.00156		0.0486	0.00123
0.62044	0.7191		0.67858	0.35871		0.04959	0.00156		0.04959	0.00123
0.61536	1.39142		0.63003	0.21383		0.05059	0.00156		0.05059	0.00123
0.63405	1.2471		0.6953	0.30747		0.05158	0.00156		0.05158	0.00123
0.57954	1.87979		0.65329	0.5131		0.05257	0.00156		0.05257	0.00123
0.62563	0.94371		0.67713	0.29754		0.05356	0.00156		0.05356	0.00123
0.62635	2.6349		0.65952	0.64809		0.05455	0.00156		0.05455	0.00123
0.6315	0.4614		0.67998	1.76456		0.055	0.00156		0.055	0.00123
0.62096	2.33957		0.65376	0.42126		0.05554	0.00156		0.05554	0.00123
0.61511	0.33677		0.65677	0.89978		0.05653	0.00156		0.05653	0.00123
0.63997	0.53961		0.65261	1.33631		0.05752	0.00156		0.05752	0.00123
0.60746	0.48337		0.6943	0.288		0.05851	0.00156		0.05851	0.00123
0.57981	1.06626		0.65941	0.48734		0.0595	0.00156		0.0595	0.00123
0.62234	0.27994		0.40787	0.3235		0.0605	0.00156		0.0605	0.00123
0.63077	1.7909		0.67522	0.9838		0.06149	0.00156		0.06149	0.00123
0.60064	0.29818		0.37229	0.5915		0.06248	0.00156		0.06248	0.00123
0.64964	0.20618		0.82597	0.21066		0.06347	0.00156		0.06347	0.00123
0.60348	0.40449		0.64447	1.0413		0.06446	0.00156		0.06446	0.00123
0.61894	0.85043		0.66192	0.2023		0.065	0.00156		0.065	0.00123
0.62649	4.24098		0.67733	0.2011		0.06545	0.00156		0.06545	0.00123
0.66885	0.56647		0.68797	0.21906		0.06644	0.00156		0.06644	0.00123
0.62416	1.39988		0.56183	0.32215		0.06743	0.00156		0.06743	0.00123
0.62053	0.48726		0.86765	0.26899		0.06842	0.00156		0.06842	0.00123
0.62665	2.04699		0.65979	1.81533		0.06941	0.00156		0.06941	0.00123
0.60678	0.26259		0.67232	1.06225		0.07041	0.00156		0.07041	0.00123
0.63183	2.78274		0.64061	0.35915		0.0714	0.00156		0.0714	0.00123
0.64179	0.26784		0.66748	0.63411		0.07239	0.00156		0.07239	0.00123
0.63394	3.23958		0.65761	0.35462		0.07338	0.00156		0.07338	0.00123
0.63121	0.85905		0.64216	0.54767		0.07437	0.00156		0.07437	0.00123
0.63539	2.08153		0.65501	0.75124		0.075	0.00156		0.075	0.00123
0.64357	0.56252		0.65642	1.63849		0.07536	0.00156		0.07536	0.00123
0.6674	0.2168		0.66674	0.92789		0.07635	0.00156		0.07635	0.00123
0.6355	1.40193		0.62981	6.86566		0.07734	0.00156		0.07734	0.00123
0.63232	1.31113		0.65623	0.92267		0.07833	0.00156		0.07833	0.00123
0.62881	1.65515		0.66938	0.40306		0.07932	0.00156		0.07932	0.00123
0.63901	0.24263		0.65585	0.56662		0.08032	0.00156		0.08032	0.00123
0.6231	0.40758		0.66047	0.98278		0.08131	0.00156		0.08131	0.00123
0.63012	0.58265		0.67039	1.55939		0.0823	0.00156		0.0823	0.00123
0.60634	0.25035		0.58965	0.49586		0.08329	0.00156		0.08329	0.00123
0.65275	0.35526		0.45192	0.29756		0.08428	0.00156		0.08428	0.00123
0.62129	1.04285		0.60441	0.27456		0.085	0.00156		0.085	0.00123
0.63131	0.49058		0.65949	2.88306		0.08527	0.00156		0.08527	0.00123
0.62022	1.44514		0.72199	2.08688		0.08626	0.00156		0.08626	0.00123
0.63678	1.00692		0.6671	1.12176		0.08725	0.00156		0.08725	0.00123
0.63071	2.77575		0.61967	0.22619		0.08824	0.00156		0.08824	0.00123
0.6301	0.51484		0.76528	0.39136		0.08923	0.00156		0.08923	0.00123
0.66512	0.26299		0.67213	0.63513		0.09023	0.00156		0.09023	0.00123
0.67923	0.20711		0.64267	0.47975		0.09122	0.00156		0.09122	0.00123
0.58458	0.45075		0.68192	0.47949		0.09221	0.00156		0.09221	0.00123
0.62872	0.98387		0.67248	0.2717		0.0932	0.00156		0.0932	0.00123
0.62177	0.94407		0.68	0.25054		0.09419	0.00156		0.09419	0.00123
0.59873	0.83919		0.66157	1.22007		0.095	0.00156		0.095	0.00123
0.62667	2.55889		0.63945	0.20203		0.09518	0.00156		0.09518	0.00123
0.63531	3.41322		0.67914	0.47931		0.09617	0.00156		0.09617	0.00123
0.62823	0.3114		0.65244	0.2053		0.09716	0.00156		0.09716	0.00123
0.62543	0.24338		0.67123	0.36574		0.09815	0.00156		0.09815	0.00123
0.57275	1.21814		0.67837	1.5517		0.09914	0.00156		0.09914	0.00123
0.6376	0.95124		0.65824	0.27125		0.10014	0.00156		0.10014	0.00123
0.63541	1.53563		0.66032	0.22187		0.10113	0.00156		0.10113	0.00123
0.6239	2.45133		0.72579	0.46441		0.10212	0.00156		0.10212	0.00123
0.62316	0.46477		0.70734	0.22703		0.10311	0.00156		0.10311	0.00123
0.62194	1.81577		0.65598	0.73955		0.1041	0.00156		0.1041	0.00123
0.6345	0.63501		0.65907	0.87766		0.105	0.00156		0.105	0.00123
0.63805	0.40701		0.65919	1.16406		0.10509	0.00156		0.10509	0.00123
0.55727	0.62329		0.62072	0.32206		0.10608	0.00156		0.10608	0.00123
0.62358	1.63991		0.66812	0.64448		0.10707	0.00156		0.10707	0.00123
0.6495	0.21442		0.54126	1.01316		0.10806	0.00156		0.10806	0.00123
0.63086	1.42782		0.65012	0.45958		0.10905	0.00156		0.10905	0.00123
0.62999	3.4554		0.66445	0.58163		0.11005	0.00156		0.11005	0.00123
0.62358	0.72214		0.65565	0.71331		0.11104	0.00156		0.11104	0.00123
0.62716	0.41637		0.4864	0.41799		0.11203	0.00156		0.11203	0.00123
0.61938	0.28322		0.65736	1.17536		0.11302	0.00156		0.11302	0.00123
0.61846	0.39818		0.42913	0.42837		0.11401	0.00156		0.11401	0.00123
0.6287	0.55761		0.64837	0.44533		0.115	0.00156		0.115	0.00123
0.63971	1.37608		0.65351	0.26748		0.115	0.00156		0.115	0.00123
0.60935	0.88612		0.6685	0.57122		0.11599	0.00156		0.11599	0.00123
0.62796	1.53841		0.65182	1.28731		0.11698	0.00156		0.11698	0.00123
0.60433	0.36207		0.65247	0.91459		0.11797	0.00156		0.11797	0.00123
0.63632	1.76583		0.62926	0.75306		0.11896	0.00156		0.11896	0.00123
0.61532	0.5157		0.66026	1.36613		0.11995	0.00156		0.11995	0.00123
0.62019	1.46498		0.64706	0.69807		0.12095	0.00156		0.12095	0.00123
0.62519	2.18408		0.66052	1.15363		0.12194	0.00156		0.12194	0.00123
0.60643	0.25098		0.65639	1.17933		0.12293	0.00156		0.12293	0.00123
0.63603	1.14581		0.66015	0.32667		0.12392	0.00156		0.12392	0.00123
0.63868	0.26095		0.27898	1.28374		0.12491	0.00156		0.12491	0.00123
0.6192	2.01134		0.66573	0.63068		0.125	0.00156		0.125	0.00123
0.62834	0.50663		0.66235	3.13411		0.1259	0.00156		0.1259	0.00123
0.61025	2.66425		0.68431	0.65119		0.12689	0.00156		0.12689	0.00123
0.63158	0.48847		0.67026	0.865		0.12788	0.00156		0.12788	0.00123
0.63279	0.26596		0.83274	0.20987		0.12887	0.00156		0.12887	0.00123
0.6386	0.26774		0.65783	0.98369		0.12986	0.00156		0.12986	0.00123
0.61544	0.21629		0.65033	1.80319		0.13086	0.00156		0.13086	0.00123
0.56271	2.69075		0.72165	0.93396		0.13185	0.00156		0.13185	0.00123
0.62633	2.66389		0.66128	1.02797		0.13284	0.00156		0.13284	0.00123
0.63356	0.55889		0.68516	0.43845		0.13383	0.00156		0.13383	0.00123
0.62537	0.58294		0.65952	1.16988		0.13482	0.00156		0.13482	0.00123
0.63844	1.4487		0.65772	0.30945		0.135	0.00156		0.135	0.00123
0.56366	2.01136		0.65886	1.01605		0.13581	0.00156		0.13581	0.00123
0.64662	0.23112		0.67785	0.43587		0.1368	0.00156		0.1368	0.00123
0.6232	0.36417		0.67882	0.34727		0.13779	0.00156		0.13779	0.00123
0.63672	0.60256		0.64683	0.34271		0.13878	0.00156		0.13878	0.00123
0.63043	1.0119		0.65913	0.29511		0.13977	0.00156		0.13977	0.00123
0.63028	0.85688		0.65283	2.93743		0.14077	0.00156		0.14077	0.00123
0.64004	0.95001		0.65411	0.83437		0.14176	0.00156		0.14176	0.00123
0.62182	0.26933		0.67341	0.28607		0.14275	0.00156		0.14275	0.00123
0.62354	1.05186		0.6721	0.24287		0.14374	0.00156		0.14374	0.00123
0.62852	1.54392		0.59308	0.31886		0.14473	0.00156		0.14473	0.00123
0.63816	0.46252		0.67007	0.71921		0.145	0.00156		0.145	0.00123
0.6495	1.18367		0.65259	0.65739		0.14572	0.00156		0.14572	0.00123
0.63125	1.20326		0.68363	0.32817		0.14671	0.00156		0.14671	0.00123
0.62354	0.52413		0.69671	0.22258		0.1477	0.00156		0.1477	0.00123
0.60861	0.70991		0.64699	1.17438		0.14869	0.00156		0.14869	0.00123
0.61324	1.48849		0.6533	1.16599		0.14968	0.00156		0.14968	0.00123
0.63284	0.249		0.66273	0.9058		0.15068	0.00156		0.15068	0.00123
0.64136	0.27583		0.64789	0.75959		0.15167	0.00156		0.15167	0.00123
0.61456	1.8723		0.66685	0.83642		0.15266	0.00156		0.15266	0.00123
0.62012	0.30832		0.6561	0.55871		0.15365	0.00156		0.15365	0.00123
0.63521	0.62313		0.66386	1.52344		0.15464	0.00156		0.15464	0.00123
0.63611	0.87888		0.66087	0.5495		0.155	0.00156		0.155	0.00123
0.64753	0.33045		0.66502	1.12719		0.15563	0.00156		0.15563	0.00123
0.6416	1.03615		0.66111	0.63168		0.15662	0.00156		0.15662	0.00123
0.6164	0.98846		0.6585	0.64691		0.15761	0.00156		0.15761	0.00123
0.64164	0.26604		0.65649	0.98664		0.1586	0.00156		0.1586	0.00123
0.64404	0.48726		0.64999	1.4787		0.15959	0.00156		0.15959	0.00123
0.62928	0.66073		0.68203	0.34268		0.16059	0.00156		0.16059	0.00123
0.62346	0.66675		0.66081	2.57588		0.16158	0.00156		0.16158	0.00123
0.63803	0.72993		0.6884	0.25101		0.16257	0.00156		0.16257	0.00123
0.62236	1.11		0.62472	0.21382		0.16356	0.00156		0.16356	0.00123
0.62382	2.23784		0.66037	0.80714		0.16455	0.00156		0.16455	0.00123
0.62409	1.40431		0.6473	0.82555		0.165	0.00156		0.165	0.00123
0.60976	0.65802		0.65828	0.30636		0.16554	0.00156		0.16554	0.00123
0.63831	0.64594		0.61089	0.22917		0.16653	0.00156		0.16653	0.00123
0.57737	0.45858		0.65196	1.0076		0.16752	0.00156		0.16752	0.00123
0.62396	0.56069		0.65153	2.40378		0.16851	0.00156		0.16851	0.00123
0.66312	0.24714		0.66257	0.96639		0.1695	0.00156		0.1695	0.00123
0.6316	0.46239		0.59002	0.20977		0.1705	0.00156		0.1705	0.00123
0.63412	1.11061		0.65111	0.31083		0.17149	0.00156		0.17149	0.00123
0.63437	1.10737		0.66323	0.36243		0.17248	0.00156		0.17248	0.00123
0.6356	0.78191		0.59941	0.40607		0.17347	0.00156		0.17347	0.00123
0.61517	1.6868		0.6478	0.49133		0.17446	0.00156		0.17446	0.00123
0.64508	0.50094		0.64862	0.86504		0.175	0.00156		0.175	0.00123
0.59225	0.51034		0.61431	0.24275		0.17545	0.00156		0.17545	0.00123
0.626	1.60887		0.61951	1.22364		0.17644	0.00156		0.17644	0.00123
0.64774	0.36467		0.67252	0.69481		0.17743	0.00156		0.17743	0.00123
0.61105	0.39747		0.66948	0.58211		0.17842	0.00156		0.17842	0.00123
0.62633	0.93847		0.66328	0.31059		0.17941	0.00156		0.17941	0.00123
0.63927	0.21043		0.65244	1.09644		0.18041	0.00156		0.18041	0.00123
0.61886	1.52563		0.92818	0.23079		0.1814	0.00156		0.1814	0.00123
0.58602	0.67976		0.64316	0.39934		0.18239	0.00156		0.18239	0.00123
0.62346	1.39284		0.65609	0.61019		0.18338	0.00156		0.18338	0.00123
0.61775	2.38403		0.665	2.27883		0.18437	0.00156		0.18437	0.00123
0.61289	1.70536		0.59697	0.2408		0.185	0.00156		0.185	0.00123
0.66323	0.26988		0.61996	0.75923		0.18536	0.00156		0.18536	0.00123
0.62707	0.33164		0.66388	0.6986		0.18635	0.00156		0.18635	0.00123
0.62504	0.36154		0.67294	0.31027		0.18734	0.00156		0.18734	0.00123
0.58079	1.29617		0.66805	0.35728		0.18833	0.00156		0.18833	0.00123
0.62992	0.31299		0.68238	0.28632		0.18932	0.00156		0.18932	0.00123
0.62094	1.10791		0.68039	0.2667		0.19032	0.00156		0.19032	0.00123
0.64357	0.3235		0.61883	0.37344		0.19131	0.00156		0.19131	0.00123
0.62172	1.36993		0.66215	0.57022		0.1923	0.00156		0.1923	0.00123
0.62007	1.33017		0.63166	0.8991		0.19329	0.00156		0.19329	0.00123
0.62501	1.61432		0.64759	0.79717		0.19428	0.00156		0.19428	0.00123
0.59303	4.81084		0.68311	0.3875		0.195	0.00156		0.195	0.00123
0.6298	0.33552		0.67727	0.21439		0.19527	0.00156		0.19527	0.00123
0.61112	0.30595		0.67085	0.53834		0.19626	0.00156		0.19626	0.00123
0.6223	0.43289		0.67278	0.69042		0.19725	0.00156		0.19725	0.00123
0.63781	1.01927		0.652	1.08642		0.19824	0.00156		0.19824	0.00123
0.5869	0.41523		0.65716	0.38779		0.19923	0.00156		0.19923	0.00123
0.64282	0.65121		0.62299	0.57565		0.20023	0.00156		0.20023	0.00123
0.57085	0.69547		0.66321	0.38569		0.20122	0.00156		0.20122	0.00123
0.64566	0.28425		0.66652	0.68714		0.20221	0.00156		0.20221	0.00123
0.62184	0.21521		0.65827	0.21842		0.2032	0.00156		0.2032	0.00123
0.63011	1.2534		0.65577	0.65759		0.20419	0.00156		0.20419	0.00123
0.61594	1.95541		0.6642	0.45879		0.205	0.00156		0.205	0.00123
0.63159	0.95598		0.67984	0.47539		0.20518	0.00156		0.20518	0.00123
0.63097	0.25862		0.67311	0.76547		0.20617	0.00156		0.20617	0.00123
0.63532	0.67498		0.6358	0.33837		0.20716	0.00156		0.20716	0.00123
0.6198	1.89302		0.64734	0.99591		0.20815	0.00156		0.20815	0.00123
0.63363	0.30732		0.53071	0.20457		0.20914	0.00156		0.20914	0.00123
0.64678	1.05259		0.66322	0.85671		0.21014	0.00156		0.21014	0.00123
0.61721	1.33617		0.67202	0.31231		0.21113	0.00156		0.21113	0.00123
0.61425	0.59051		0.64341	0.4586		0.21212	0.00156		0.21212	0.00123
0.63039	1.62789		0.65987	0.66253		0.21311	0.00156		0.21311	0.00123
0.60238	0.276		0.63243	0.20424		0.2141	0.00156		0.2141	0.00123
0.63187	0.57511		0.66797	0.43891		0.215	0.00156		0.215	0.00123
0.63142	2.79139		0.66734	0.66627		0.21509	0.00156		0.21509	0.00123
0.62899	1.79241		0.67441	0.27209		0.21608	0.00156		0.21608	0.00123
0.63666	0.9871		0.6587	0.46755		0.21707	0.00156		0.21707	0.00123
0.64792	0.33051		0.57728	0.51839		0.21806	0.00156		0.21806	0.00123
0.62552	2.65821		0.66127	0.58108		0.21905	0.00156		0.21905	0.00123
0.64424	0.27357		0.6707	0.33166		0.22005	0.00156		0.22005	0.00123
0.63605	0.62706		0.66532	0.2665		0.22104	0.00156		0.22104	0.00123
0.62139	1.20349		0.68452	0.28204		0.22203	0.00156		0.22203	0.00123
0.6294	0.53527		0.64881	1.22365		0.22302	0.00156		0.22302	0.00123
0.39151	0.26036		0.6599	0.64292		0.22401	0.00156		0.22401	0.00123
0.63137	1.37817		0.64487	1.45576		0.225	0.00156		0.225	0.00123
0.62067	0.70436		0.66896	0.93908		0.225	0.00156		0.225	0.00123
0.62029	2.39106		0.64375	0.46596		0.22599	0.00156		0.22599	0.00123
0.62375	3.19314		0.67079	0.53126		0.22698	0.00156		0.22698	0.00123
0.61708	1.77534		0.66217	0.28333		0.22797	0.00156		0.22797	0.00123
0.91079	0.23928		0.66806	1.83292		0.22896	0.00156		0.22896	0.00123
0.63123	1.02075		0.55899	2.96868		0.22995	0.00156		0.22995	0.00123
0.63066	0.39906		0.37818	1.25867		0.23095	0.00156		0.23095	0.00123
0.64787	0.61306		0.25494	0.80275		0.23194	0.00156		0.23194	0.00123
0.58306	3.08263		0.62467	0.27047		0.23293	0.00156		0.23293	0.00123
0.62848	0.3282		0.65335	0.81602		0.23392	0.00156		0.23392	0.00123
0.63344	0.55324		0.71529	0.81177		0.23491	0.00156		0.23491	0.00123
0.62856	0.72871		0.74037	1.2396		0.235	0.00156		0.235	0.00123
0.62393	0.64098		0.5844	0.60834		0.2359	0.00156		0.2359	0.00123
0.62915	2.26007		0.65631	0.60218		0.23689	0.00156		0.23689	0.00123
0.57252	1.63473		0.66806	0.60654		0.23788	0.00156		0.23788	0.00123
0.63017	1.55535		0.68243	0.87367		0.23887	0.00156		0.23887	0.00123
0.6361	0.71931		0.66995	0.70353		0.23986	0.00156		0.23986	0.00123
0.62422	0.97808		0.66063	1.47656		0.24086	0.00156		0.24086	0.00123
0.64785	0.61043		0.74207	0.35967		0.24185	0.00156		0.24185	0.00123
0.60968	1.10299		0.66327	1.15153		0.24284	0.00156		0.24284	0.00123
0.62094	0.21477		0.60808	0.33732		0.24383	0.00156		0.24383	0.00123
0.62965	1.53567		0.66152	0.4434		0.24482	0.00156		0.24482	0.00123
0.62911	0.91166		0.59307	0.3384		0.245	0.00156		0.245	0.00123
0.6301	0.83966		0.6485	0.60322		0.24581	0.00156		0.24581	0.00123
0.61293	2.85079		0.66653	0.23729		0.2468	0.00156		0.2468	0.00123
0.61614	0.99592		0.65873	0.48741		0.24779	0.00156		0.24779	0.00123
0.62693	0.41947		0.65878	0.31172		0.24878	0.00156		0.24878	0.00123
0.61986	0.99658		0.663	1.64748		0.24977	0.00156		0.24977	0.00123
0.6162	1.90745		0.66317	0.33809		0.25077	0.00156		0.25077	0.00123
0.66128	1.33587		0.6686	0.24764		0.25176	0.00156		0.25176	0.00123
0.64759	1.05928		0.6563	0.94413		0.25275	0.00156		0.25275	0.00123
0.64114	0.41571		0.65691	0.57516		0.25374	0.00156		0.25374	0.00123
0.63211	0.82201		0.66116	0.96842		0.25473	0.00156		0.25473	0.00123
0.64681	0.3542		0.69264	0.23032		0.255	0.00156		0.255	0.00123
0.62082	0.40877		0.65898	0.306		0.25572	0.00156		0.25572	0.00123
0.62538	1.21098		0.74435	0.20791		0.25671	0.00156		0.25671	0.00123
0.62326	1.16837		0.65473	0.58341		0.2577	0.00156		0.2577	0.00123
0.62332	0.33571		0.65284	1.43832		0.25869	0.00156		0.25869	0.00123
0.61153	0.38952		0.60352	1.08942		0.25968	0.00156		0.25968	0.00123
0.63192	0.33055		0.67881	0.39429		0.26068	0.00156		0.26068	0.00123
0.64517	0.97602		0.60549	0.96372		0.26167	0.00156		0.26167	0.00123
0.66399	0.28798		0.79484	0.38736		0.26266	0.00156		0.26266	0.00123
0.63502	0.44842		0.67203	0.30485		0.26365	0.00156		0.26365	0.00123
0.57145	0.39743		0.65002	0.66241		0.26464	0.00156		0.26464	0.00123
0.61911	2.13865		0.67248	0.43861		0.265	0.00156		0.265	0.00123
0.61611	0.97547		0.64504	0.53152		0.26563	0.00156		0.26563	0.00123
0.62987	2.248		0.66114	1.55406		0.26662	0.00156		0.26662	0.00123
0.65313	0.23427		0.64175	0.60895		0.26761	0.00156		0.26761	0.00123
0.62359	0.52329		0.56859	0.4869		0.2686	0.00156		0.2686	0.00123
0.63852	0.98323		0.68486	0.34269		0.26959	0.00156		0.26959	0.00123
0.62124	3.93424		0.66837	0.89559		0.27059	0.00156		0.27059	0.00123
0.61441	0.40302		0.63426	0.25785		0.27158	0.00156		0.27158	0.00123
0.61348	1.15215		0.65027	1.80232		0.27257	0.00156		0.27257	0.00123
0.60789	0.56526		0.65177	1.17946		0.27356	0.00156		0.27356	0.00123
0.62375	1.48962		0.66623	0.40669		0.27455	0.00156		0.27455	0.00123
0.57032	0.21577		0.66822	0.42589		0.275	0.00156		0.275	0.00123
0.62056	3.36434		0.67042	3.21564		0.27554	0.00156		0.27554	0.00123
0.61656	2.12449		0.64369	0.2635		0.27653	0.00156		0.27653	0.00123
0.61979	4.31408		0.68315	0.2365		0.27752	0.00156		0.27752	0.00123
0.62719	1.77454		0.6703	0.46411		0.27851	0.00156		0.27851	0.00123
0.62485	0.57081		0.68525	0.24238		0.2795	0.00156		0.2795	0.00123
0.61673	0.76313		0.66156	0.96201		0.2805	0.00156		0.2805	0.00123
0.62578	0.51646		0.67783	0.42406		0.28149	0.00156		0.28149	0.00123
0.62777	1.50222		0.65269	0.78197		0.28248	0.00156		0.28248	0.00123
0.61807	0.48198		0.65796	0.92959		0.28347	0.00156		0.28347	0.00123
0.57761	0.46513		0.67588	0.94852		0.28446	0.00156		0.28446	0.00123
0.63519	0.62708		0.67933	0.32692		0.285	0.00156		0.285	0.00123
0.57397	0.75023		0.67071	0.59311		0.28545	0.00156		0.28545	0.00123
0.63985	0.36691		0.92767	0.61663		0.28644	0.00156		0.28644	0.00123
0.62875	1.74117		0.94983	0.2094		0.28743	0.00156		0.28743	0.00123
0.58719	0.99359		0.66149	1.85193		0.28842	0.00156		0.28842	0.00123
0.62306	0.41838		0.68131	1.21213		0.28941	0.00156		0.28941	0.00123
0.46888	1.30764		0.65085	0.40298		0.29041	0.00156		0.29041	0.00123
0.6262	1.15568		0.67023	0.83148		0.2914	0.00156		0.2914	0.00123
0.63395	0.61921		0.65093	2.44165		0.29239	0.00156		0.29239	0.00123
0.62259	0.3383		0.66336	1.43871		0.29338	0.00156		0.29338	0.00123
0.62784	0.51636		0.52736	0.22906		0.29437	0.00156		0.29437	0.00123
0.62753	2.75539		0.65065	0.26971		0.295	0.00156		0.295	0.00123
0.62364	1.38804		0.64848	0.29639		0.29536	0.00156		0.29536	0.00123
0.61807	2.79905		0.66164	0.27729		0.29635	0.00156		0.29635	0.00123
0.63458	0.98786		0.64302	0.76833		0.29734	0.00156		0.29734	0.00123
0.58781	0.56662		0.63659	2.02245		0.29833	0.00156		0.29833	0.00123
0.64094	1.07278		0.55377	0.41151		0.29932	0.00156		0.29932	0.00123
0.62636	0.70999		0.64459	0.76796		0.30032	0.00156		0.30032	0.00123
0.61975	1.15861		0.64195	0.20363		0.30131	0.00156		0.30131	0.00123
0.64048	0.33198		0.69024	0.21524		0.3023	0.00156		0.3023	0.00123
0.6302	0.76444		0.66216	0.43057		0.30329	0.00156		0.30329	0.00123
0.61168	0.75138		0.72824	0.33314		0.30428	0.00156		0.30428	0.00123
0.63066	0.27505		0.65186	1.42251		0.305	0.00156		0.305	0.00123
0.62772	1.15952		0.65906	0.48646		0.30527	0.00156		0.30527	0.00123
0.56056	0.94815		0.66939	0.68921		0.30626	0.00156		0.30626	0.00123
0.62556	2.65001		0.63832	0.44984		0.30725	0.00156		0.30725	0.00123
0.62507	2.17094		0.65931	0.25954		0.30824	0.00156		0.30824	0.00123
0.62263	0.89095		0.65182	1.62699		0.30923	0.00156		0.30923	0.00123
0.63498	0.63272		0.64369	0.2758		0.31023	0.00156		0.31023	0.00123
0.62178	2.38673		0.6559	1.03502		0.31122	0.00156		0.31122	0.00123
0.62865	1.38231		0.65168	0.85852		0.31221	0.00156		0.31221	0.00123
0.6146	2.51271		0.57135	3.9915		0.3132	0.00156		0.3132	0.00123
0.63181	0.60286		0.67193	0.9788		0.31419	0.00156		0.31419	0.00123
0.65554	0.25571		0.65129	0.97209		0.315	0.00156		0.315	0.00123
0.629	0.47334		0.65669	1.23939		0.31518	0.00156		0.31518	0.00123
0.62989	1.48506		0.5997	0.37035		0.31617	0.00156		0.31617	0.00123
0.62594	0.76205		0.67133	1.13491		0.31716	0.00156		0.31716	0.00123
0.63159	0.5633		0.68122	0.59215		0.31815	0.00156		0.31815	0.00123
0.62625	1.30416		0.65497	0.53554		0.31914	0.00156		0.31914	0.00123
0.61785	2.15914		0.67282	0.81504		0.32014	0.00156		0.32014	0.00123
0.61995	0.82794		0.64171	0.87828		0.32113	0.00156		0.32113	0.00123
0.65299	0.24752		0.65618	0.52699		0.32212	0.00156		0.32212	0.00123
0.61345	1.7229		0.65478	1.58599		0.32311	0.00156		0.32311	0.00123
0.62093	0.68392		0.68129	0.41014		0.3241	0.00156		0.3241	0.00123
0.61783	0.68391		0.53914	0.23042		0.325	0.00156		0.325	0.00123
0.62776	0.33139		0.65807	0.37378		0.32509	0.00156		0.32509	0.00123
0.63254	0.51679		0.65165	0.57435		0.32608	0.00156		0.32608	0.00123
0.56512	2.79359		0.69724	0.34258		0.32707	0.00156		0.32707	0.00123
0.56538	0.47406		0.65362	0.84385		0.32806	0.00156		0.32806	0.00123
0.64968	0.72435		0.66073	0.46428		0.32905	0.00156		0.32905	0.00123
0.61312	0.35451		0.66511	0.51998		0.33005	0.00156		0.33005	0.00123
0.63951	0.56166		0.64915	1.73509		0.33104	0.00156		0.33104	0.00123
0.58752	0.91087		0.64476	2.42706		0.33203	0.00156		0.33203	0.00123
0.62197	0.93872		0.68232	0.20238		0.33302	0.00156		0.33302	0.00123
0.62357	3.70672		0.66589	0.68758		0.33401	0.00156		0.33401	0.00123
0.62344	0.709		0.66626	0.87789		0.335	0.00156		0.335	0.00123
0.57827	1.06321		0.67587	0.30771		0.33599	0.00156		0.33599	0.00123
0.63293	3.47066		0.65183	0.34905		0.33698	0.00156		0.33698	0.00123
0.61737	1.27116		0.65963	1.02875		0.33797	0.00156		0.33797	0.00123
0.62884	1.14553		0.65573	1.77536		0.33896	0.00156		0.33896	0.00123
0.62246	0.8586		0.66697	1.26796		0.33995	0.00156		0.33995	0.00123
0.64307	0.37633		0.65091	0.2947		0.34095	0.00156		0.34095	0.00123
0.63105	0.23858		0.64397	1.02372		0.34194	0.00156		0.34194	0.00123
0.61855	0.55944		0.66238	0.62802		0.34293	0.00156		0.34293	0.00123
0.62286	1.6651		0.62662	0.41607		0.34392	0.00156		0.34392	0.00123
0.62416	1.03056		0.68831	0.28721		0.34491	0.00156		0.34491	0.00123
0.658	0.22414		0.66446	1.68633		0.345	0.00156		0.345	0.00123
0.63876	0.37305		0.65756	0.5702		0.3459	0.00156		0.3459	0.00123
0.5922	0.839		0.67186	0.41417		0.34689	0.00156		0.34689	0.00123
0.63719	0.43157		0.66162	0.59463		0.34788	0.00156		0.34788	0.00123
0.63389	0.50406		0.68719	0.45844		0.34887	0.00156		0.34887	0.00123
0.60277	0.22734		0.65595	0.45625		0.34986	0.00156		0.34986	0.00123
0.61207	0.34264		0.66331	0.55108		0.35086	0.00156		0.35086	0.00123
0.64104	0.52526		0.61301	0.29919		0.35185	0.00156		0.35185	0.00123
0.62101	0.56052		0.65031	1.09544		0.35284	0.00156		0.35284	0.00123
0.70677	0.24283		0.64599	1.33817		0.35383	0.00156		0.35383	0.00123
0.62541	0.58824		0.65645	0.96658		0.35482	0.00156		0.35482	0.00123
0.62229	0.44315		0.66349	0.51482		0.355	0.00156		0.355	0.00123
0.62303	0.96861		0.66818	0.52716		0.35581	0.00156		0.35581	0.00123
0.57617	1.80699		0.66129	0.94154		0.3568	0.00156		0.3568	0.00123
0.64161	0.38771		0.66088	0.56921		0.35779	0.00156		0.35779	0.00123
0.63159	0.8937		0.66312	0.44338		0.35878	0.00156		0.35878	0.00123
0.6147	0.30048		0.65413	1.8073		0.35977	0.00156		0.35977	0.00123
0.81056	0.20939		0.31546	0.32235		0.36077	0.00156		0.36077	0.00123
0.62771	0.47788		0.71759	0.26295		0.36176	0.00156		0.36176	0.00123
0.6279	0.22425		0.67789	0.21898		0.36275	0.00156		0.36275	0.00123
0.62206	1.70356		0.65198	1.83371		0.36374	0.00156		0.36374	0.00123
0.62737	0.41204		0.60219	0.56276		0.36473	0.00156		0.36473	0.00123
0.61493	0.64768		0.65317	2.12662		0.365	0.00156		0.365	0.00123
0.62785	0.82747		0.6581	0.68689		0.36572	0.00156		0.36572	0.00123
0.57462	0.3515		0.65405	0.20651		0.36671	0.00156		0.36671	0.00123
0.62455	2.93815		0.66489	1.0058		0.3677	0.00156		0.3677	0.00123
0.63698	0.65936		0.65629	0.3424		0.36869	0.00156		0.36869	0.00123
0.58838	0.2791		0.68485	0.20205		0.36968	0.00156		0.36968	0.00123
0.62878	1.02754		0.67588	0.35213		0.37068	0.00156		0.37068	0.00123
0.63878	1.08905		0.61185	0.20491		0.37167	0.00156		0.37167	0.00123
0.60999	0.65938		0.66558	1.04874		0.37266	0.00156		0.37266	0.00123
0.62088	1.14387		0.65873	1.45916		0.37365	0.00156		0.37365	0.00123
0.64173	1.05343		0.69902	0.22778		0.37464	0.00156		0.37464	0.00123
0.6345	1.24716		0.6554	0.80397		0.375	0.00156		0.375	0.00123
0.6313	0.82145		0.57866	1.29769		0.37563	0.00156		0.37563	0.00123
0.62238	0.39381		0.6559	0.8826		0.37662	0.00156		0.37662	0.00123
0.6105	0.64476		0.66495	2.05727		0.37761	0.00156		0.37761	0.00123
0.62424	0.57881		0.3231	0.83091		0.3786	0.00156		0.3786	0.00123
0.61324	0.20346		0.68151	0.37454		0.37959	0.00156		0.37959	0.00123
0.61991	0.91229		0.61314	0.34973		0.38059	0.00156		0.38059	0.00123
0.62403	1.04299		0.64703	0.46766		0.38158	0.00156		0.38158	0.00123
0.64055	0.31097		0.65859	0.24527		0.38257	0.00156		0.38257	0.00123
0.65121	0.23061		0.61201	0.21428		0.38356	0.00156		0.38356	0.00123
0.63472	0.67881		0.6583	0.88507		0.38455	0.00156		0.38455	0.00123
0.62841	0.9264		0.66332	0.58887		0.385	0.00156		0.385	0.00123
0.61406	0.94098		0.66192	1.91849		0.38554	0.00156		0.38554	0.00123
0.61644	0.65595		0.66923	1.09524		0.38653	0.00156		0.38653	0.00123
0.62424	0.80315		0.66191	0.42726		0.38752	0.00156		0.38752	0.00123
0.6162	0.45855		0.64233	1.78233		0.38851	0.00156		0.38851	0.00123
0.6291	0.26516		0.65868	0.61907		0.3895	0.00156		0.3895	0.00123
0.61211	0.43932		0.64829	0.90653		0.3905	0.00156		0.3905	0.00123
0.64552	1.14313		0.67593	0.61519		0.39149	0.00156		0.39149	0.00123
0.64436	0.20678		0.6499	0.96495		0.39248	0.00156		0.39248	0.00123
0.60691	0.37178		0.67269	1.85606		0.39347	0.00156		0.39347	0.00123
0.62839	1.01007		0.91437	0.25486		0.39446	0.00156		0.39446	0.00123
0.66314	0.21435		0.65934	0.96413		0.395	0.00156		0.395	0.00123
0.62079	0.77177		0.65518	0.46853		0.39545	0.00156		0.39545	0.00123
0.60557	0.49472		0.66929	0.25316		0.39644	0.00156		0.39644	0.00123
0.63138	1.80197		0.66563	1.05029		0.39743	0.00156		0.39743	0.00123
0.61928	1.05127		0.64788	2.1434		0.39842	0.00156		0.39842	0.00123
0.63013	0.93619		0.47943	0.58652		0.39941	0.00156		0.39941	0.00123
0.63507	0.69299		0.6694	2.28647		0.40041	0.00156		0.40041	0.00123
0.63991	0.39467		0.66108	0.55094		0.4014	0.00156		0.4014	0.00123
0.62703	1.54218		0.64357	0.94372		0.40239	0.00156		0.40239	0.00123
0.63084	1.76386		0.65388	1.94906		0.40338	0.00156		0.40338	0.00123
0.63687	1.26853		0.18089	0.55955		0.40437	0.00156		0.40437	0.00123
0.61472	0.74074		0.64211	0.5954		0.405	0.00156		0.405	0.00123
0.65627	1.74849		0.6732	0.33102		0.40536	0.00156		0.40536	0.00123
0.6332	1.02727		0.67863	0.30959		0.40635	0.00156		0.40635	0.00123
0.67677	0.21418		0.66607	0.33806		0.40734	0.00156		0.40734	0.00123
0.66615	0.29908		0.66272	1.35095		0.40833	0.00156		0.40833	0.00123
0.63247	0.42241		0.66913	0.51065		0.40932	0.00156		0.40932	0.00123
0.62331	0.42221		0.66049	0.74109		0.41032	0.00156		0.41032	0.00123
0.66623	0.21682		0.61199	0.2618		0.41131	0.00156		0.41131	0.00123
0.64589	0.2304		0.63826	3.35563		0.4123	0.00156		0.4123	0.00123
0.6402	0.35042		0.66534	0.73739		0.41329	0.00156		0.41329	0.00123
0.61854	0.77531		0.67697	0.35292		0.41428	0.00156		0.41428	0.00123
0.62924	1.12767		0.83107	0.27923		0.415	0.00156		0.415	0.00123
0.61461	1.37462		0.72157	0.28655		0.41527	0.00156		0.41527	0.00123
0.62381	0.35092		0.66495	0.35491		0.41626	0.00156		0.41626	0.00123
0.65654	0.55843		0.65785	0.42546		0.41725	0.00156		0.41725	0.00123
0.62423	2.24724		0.72992	0.2577		0.41824	0.00156		0.41824	0.00123
0.63345	3.2934		0.64848	0.96802		0.41923	0.00156		0.41923	0.00123
0.62746	0.77124		0.70639	0.22614		0.42023	0.00156		0.42023	0.00123
0.62837	1.06391		0.66392	1.47235		0.42122	0.00156		0.42122	0.00123
0.63299	0.54002		0.66195	0.70283		0.42221	0.00156		0.42221	0.00123
0.64846	0.26256		0.65517	0.56768		0.4232	0.00156		0.4232	0.00123
0.6243	0.98256		0.64636	21.7231		0.42419	0.00156		0.42419	0.00123
0.42922	0.30817		0.68853	0.27894		0.425	0.00156		0.425	0.00123
0.63116	0.912		0.65766	1.0241		0.42518	0.00156		0.42518	0.00123
0.6065	0.29837		0.64283	0.89521		0.42617	0.00156		0.42617	0.00123
0.6307	0.9397		0.68149	0.28641		0.42716	0.00156		0.42716	0.00123
0.62464	1.60397		0.68324	0.21137		0.42815	0.00156		0.42815	0.00123
0.61974	0.29951		0.65657	1.92658		0.42914	0.00156		0.42914	0.00123
0.61718	0.70291		0.60215	0.48791		0.43014	0.00156		0.43014	0.00123
0.56105	1.38703		0.65399	1.06211		0.43113	0.00156		0.43113	0.00123
0.63661	3.10664		0.66396	0.47482		0.43212	0.00156		0.43212	0.00123
0.641	0.24664		0.66239	0.47101		0.43311	0.00156		0.43311	0.00123
0.61234	1.04111		0.65811	0.51048		0.4341	0.00156		0.4341	0.00123
0.63308	0.44388		0.67665	0.24278		0.435	0.00156		0.435	0.00123
0.62071	0.76952		0.66274	0.95691		0.43509	0.00156		0.43509	0.00123
0.61895	0.28915		0.60052	0.44513		0.43608	0.00156		0.43608	0.00123
0.63351	0.29393		0.47874	0.25798		0.43707	0.00156		0.43707	0.00123
0.63085	2.32324		0.66031	1.59508		0.43806	0.00156		0.43806	0.00123
0.61623	0.26769		0.66137	0.66766		0.43905	0.00156		0.43905	0.00123
0.62598	0.83914		0.66008	0.69804		0.44005	0.00156		0.44005	0.00123
0.62845	1.8305		0.66989	1.0823		0.44104	0.00156		0.44104	0.00123
0.60974	2.01316		0.62935	0.21311		0.44203	0.00156		0.44203	0.00123
0.60002	2.50299		0.65724	1.00944		0.44302	0.00156		0.44302	0.00123
0.62215	0.95946		0.65583	0.84746		0.44401	0.00156		0.44401	0.00123
0.63186	1.18573		0.64766	1.21101		0.445	0.00156		0.445	0.00123
0.63833	1.16283		0.68642	0.84643		0.445	0.00156		0.445	0.00123
0.61418	0.30687		0.66305	0.20264		0.44599	0.00156		0.44599	0.00123
0.63922	0.66347		0.64947	1.56337		0.44698	0.00156		0.44698	0.00123
0.61874	1.31214		0.67523	0.20192		0.44797	0.00156		0.44797	0.00123
0.62454	0.3425		0.71367	0.54077		0.44896	0.00156		0.44896	0.00123
0.63159	0.36714		0.66671	0.36851		0.44995	0.00156		0.44995	0.00123
0.64977	0.27141		0.66847	0.31489		0.45095	0.00156		0.45095	0.00123
0.63515	0.60053		0.68269	0.26534		0.45194	0.00156		0.45194	0.00123
0.61337	0.76246		0.65579	1.56967		0.45293	0.00156		0.45293	0.00123
0.64248	0.58426		0.65721	0.29879		0.45392	0.00156		0.45392	0.00123
0.62676	1.34654		0.66608	0.34997		0.45491	0.00156		0.45491	0.00123
0.64026	0.21922		0.64208	1.16583		0.455	0.00156		0.455	0.00123
0.61895	1.41945		0.68797	0.22217		0.4559	0.00156		0.4559	0.00123
0.62422	0.90366		0.67206	0.58774		0.45689	0.00156		0.45689	0.00123
0.63969	1.35997		0.66029	0.61807		0.45788	0.00156		0.45788	0.00123
0.62651	0.61996		0.65833	0.7858		0.45887	0.00156		0.45887	0.00123
0.631	0.30807		0.63749	3.03962		0.45986	0.00156		0.45986	0.00123
0.61619	0.93937		0.6541	1.46498		0.46086	0.00156		0.46086	0.00123
0.62615	0.7903		0.62342	0.7741		0.46185	0.00156		0.46185	0.00123
0.57907	0.88087		0.6593	1.13508		0.46284	0.00156		0.46284	0.00123
0.61654	0.3358		0.68151	0.34359		0.46383	0.00156		0.46383	0.00123
0.62456	1.77196		0.65335	1.10748		0.46482	0.00156		0.46482	0.00123
0.63164	0.21497		0.65634	3.67433		0.465	0.00156		0.465	0.00123
0.63025	1.33204		0.66561	0.83525		0.46581	0.00156		0.46581	0.00123
0.6253	2.63462		0.64774	1.90563		0.4668	0.00156		0.4668	0.00123
0.61878	0.45832		0.66091	2.15346		0.46779	0.00156		0.46779	0.00123
0.64359	0.92771		0.66616	1.48759		0.46878	0.00156		0.46878	0.00123
0.6589	0.20282		0.64937	1.09503		0.46977	0.00156		0.46977	0.00123
0.68741	0.20216		0.66187	0.67858		0.47077	0.00156		0.47077	0.00123
0.62514	1.58547		0.65342	0.22097		0.47176	0.00156		0.47176	0.00123
0.60554	0.23687		0.66374	2.00516		0.47275	0.00156		0.47275	0.00123
0.64195	0.30419		0.64101	1.16445		0.47374	0.00156		0.47374	0.00123
0.55895	0.62432		0.5645	2.68253		0.47473	0.00156		0.47473	0.00123
0.59647	0.82819		0.65257	0.27062		0.475	0.00156		0.475	0.00123
0.61818	0.59695		0.63961	2.39489		0.47572	0.00156		0.47572	0.00123
0.61851	0.21563		0.67035	0.35174		0.47671	0.00156		0.47671	0.00123
0.62004	0.51016		0.60579	0.22675		0.4777	0.00156		0.4777	0.00123
0.64237	0.9298		0.57153	0.43176		0.47869	0.00156		0.47869	0.00123
0.60304	0.91735		0.61989	0.41555		0.47968	0.00156		0.47968	0.00123
0.62153	0.5455		0.64199	0.42761		0.48068	0.00156		0.48068	0.00123
0.64286	0.54433		0.6632	1.09943		0.48167	0.00156		0.48167	0.00123
0.62763	0.69851		0.63755	0.35428		0.48266	0.00156		0.48266	0.00123
0.60179	0.21045		0.66516	0.27541		0.48365	0.00156		0.48365	0.00123
0.61231	0.26124		0.66075	0.76291		0.48464	0.00156		0.48464	0.00123
0.61407	0.56997		0.64466	0.2836		0.485	0.00156		0.485	0.00123
0.62432	0.37931		0.66995	0.52876		0.48563	0.00156		0.48563	0.00123
0.62348	2.11913		0.60969	0.44328		0.48662	0.00156		0.48662	0.00123
0.67973	0.2314		0.66782	0.32115		0.48761	0.00156		0.48761	0.00123
0.62424	1.44326		0.65391	0.57857		0.4886	0.00156		0.4886	0.00123
0.64177	0.23054		0.61604	0.63274		0.48959	0.00156		0.48959	0.00123
0.64316	0.26613		0.66867	0.89629		0.49059	0.00156		0.49059	0.00123
0.6535	0.51571		0.67278	0.87335		0.49158	0.00156		0.49158	0.00123
0.63889	0.65141		0.65943	0.57604		0.49257	0.00156		0.49257	0.00123
0.62774	0.25551		0.61564	0.21986		0.49356	0.00156		0.49356	0.00123
0.61639	0.49496		0.66802	0.26799		0.49455	0.00156		0.49455	0.00123
0.62163	2.35883		0.58749	0.25812		0.495	0.00156		0.495	0.00123
0.62645	0.47625		0.66864	1.46988		0.49554	0.00156		0.49554	0.00123
0.632	0.343		0.66558	0.90562		0.49653	0.00156		0.49653	0.00123
0.59808	0.28384		0.65351	0.64741		0.49752	0.00156		0.49752	0.00123
0.62407	0.63973		0.65702	2.00553		0.49851	0.00156		0.49851	0.00123
0.62612	0.32969		0.59704	0.28249		0.4995	0.00156		0.4995	0.00123
0.63528	0.42681		0.64641	0.78211		0.5005	0.00156		0.5005	0.00123
0.65176	0.24308		0.66414	0.28485		0.50149	0.00156		0.50149	0.00123
0.63202	0.22391		0.44215	0.37142		0.50248	0.00156		0.50248	0.00123
0.62104	1.98329		0.68653	0.34609		0.50347	0.00156		0.50347	0.00123
0.5856	0.29131		0.66593	0.23906		0.50446	0.00156		0.50446	0.00123
0.62759	0.3263		0.60029	0.48723		0.505	0.00156		0.505	0.00123
0.62903	0.90773		0.69856	0.294		0.50545	0.00156		0.50545	0.00123
0.62686	0.76221		0.61063	0.24781		0.50644	0.00156		0.50644	0.00123
0.62291	1.91583		0.65334	0.45957		0.50743	0.00156		0.50743	0.00123
0.63461	0.4657		0.6001	0.22295		0.50842	0.00156		0.50842	0.00123
0.61289	0.45232		0.63557	0.32956		0.50941	0.00156		0.50941	0.00123
0.61487	1.88051		0.51228	0.38629		0.51041	0.00156		0.51041	0.00123
0.61754	0.71365		0.62595	0.62259		0.5114	0.00156		0.5114	0.00123
0.6314	0.29124		0.65598	0.30404		0.51239	0.00156		0.51239	0.00123
0.61664	0.41209		0.65929	0.79047		0.51338	0.00156		0.51338	0.00123
0.6653	0.21919		0.65512	1.27724		0.51437	0.00156		0.51437	0.00123
0.57437	1.28695		0.65586	0.96385		0.515	0.00156		0.515	0.00123
0.62847	1.4995		0.64525	1.9692		0.51536	0.00156		0.51536	0.00123
0.63629	0.55462		0.67065	0.51865		0.51635	0.00156		0.51635	0.00123
0.63404	0.23789		0.66152	0.26305		0.51734	0.00156		0.51734	0.00123
0.63928	0.58015		0.65611	1.3873		0.51833	0.00156		0.51833	0.00123
0.65585	0.3324		0.67485	0.45928		0.51932	0.00156		0.51932	0.00123
0.6288	0.33608		0.66902	0.2436		0.52032	0.00156		0.52032	0.00123
0.64014	1.00629		0.61322	0.43361		0.52131	0.00156		0.52131	0.00123
0.62622	0.46999		0.65761	1.50141		0.5223	0.00156		0.5223	0.00123
0.62737	1.31134		0.66045	0.62421		0.52329	0.00156		0.52329	0.00123
0.61924	1.74053		0.66405	0.25788		0.52428	0.00156		0.52428	0.00123
0.57462	2.76491		0.55412	0.37799		0.525	0.00156		0.525	0.00123
0.61184	2.75475		0.70045	0.22358		0.52527	0.00156		0.52527	0.00123
0.6498	0.36661		0.63163	0.41464		0.52626	0.00156		0.52626	0.00123
0.6236	1.63151		0.6021	1.01869		0.52725	0.00156		0.52725	0.00123
0.61666	1.38112		0.67636	0.23489		0.52824	0.00156		0.52824	0.00123
0.62534	1.13567		0.6667	0.65136		0.52923	0.00156		0.52923	0.00123
0.6447	0.44324		0.52379	0.27348		0.53023	0.00156		0.53023	0.00123
0.62077	0.47108		0.66072	1.0059		0.53122	0.00156		0.53122	0.00123
0.62098	1.03599		0.65706	1.72596		0.53221	0.00156		0.53221	0.00123
0.61999	0.62314		0.65697	1.60924		0.5332	0.00156		0.5332	0.00123
0.63702	0.57804		0.64277	0.87838		0.53419	0.00156		0.53419	0.00123
0.62621	1.06587		0.60566	0.77492		0.535	0.00156		0.535	0.00123
0.64049	0.27968		0.67797	0.32513		0.53518	0.00156		0.53518	0.00123
0.56605	0.33353		0.67908	0.22281		0.53617	0.00156		0.53617	0.00123
0.62771	0.88228		0.61165	0.24714		0.53716	0.00156		0.53716	0.00123
0.62596	0.75503		0.60239	0.60298		0.53815	0.00156		0.53815	0.00123
0.62917	2.76726		0.61913	0.25914		0.53914	0.00156		0.53914	0.00123
0.6234	0.38586		0.66016	0.89401		0.54014	0.00156		0.54014	0.00123
0.64265	0.2902		0.64443	1.27838		0.54113	0.00156		0.54113	0.00123
0.64214	0.48873		0.65266	0.67654		0.54212	0.00156		0.54212	0.00123
0.6309	0.22636		0.67828	0.29802		0.54311	0.00156		0.54311	0.00123
0.62721	0.99554		0.66899	0.82		0.5441	0.00156		0.5441	0.00123
0.61894	1.25156		0.67559	0.20407		0.545	0.00156		0.545	0.00123
0.62853	1.03574		0.65606	1.30739		0.54509	0.00156		0.54509	0.00123
0.61816	0.30611		0.68047	0.25704		0.54608	0.00156		0.54608	0.00123
0.57931	0.61352		0.71124	0.68364		0.54707	0.00156		0.54707	0.00123
0.62275	0.6217		0.69547	0.25854		0.54806	0.00156		0.54806	0.00123
0.63664	0.34573		0.67333	0.27542		0.54905	0.00156		0.54905	0.00123
0.62404	0.32837		0.65018	0.83688		0.55005	0.00156		0.55005	0.00123
0.63891	1.00412		0.65639	0.26405		0.55104	0.00156		0.55104	0.00123
0.62069	0.74348		0.64862	1.96328		0.55203	0.00156		0.55203	0.00123
0.62752	1.17616		0.67945	0.37452		0.55302	0.00156		0.55302	0.00123
0.63961	0.72029		0.67675	0.22581		0.55401	0.00156		0.55401	0.00123
0.617	2.03984		0.44747	0.20272		0.555	0.00156		0.555	0.00123
0.62239	1.05432		0.66234	0.42205		0.55599	0.00156		0.55599	0.00123
0.63632	0.2467		0.66513	1.58534		0.55698	0.00156		0.55698	0.00123
0.62227	1.02151		0.64901	0.82607		0.55797	0.00156		0.55797	0.00123
0.62694	0.45555		0.67275	0.51155		0.55896	0.00156		0.55896	0.00123
0.62449	0.4434		0.62289	0.37788		0.55995	0.00156		0.55995	0.00123
0.64345	0.2646		0.66246	1.5827		0.56095	0.00156		0.56095	0.00123
0.62006	0.36316		0.66666	0.85967		0.56194	0.00156		0.56194	0.00123
0.61514	1.26647		0.65898	0.65968		0.56293	0.00156		0.56293	0.00123
0.62354	1.40662		0.64528	0.66602		0.56392	0.00156		0.56392	0.00123
0.63075	0.62233		0.62609	0.75285		0.56491	0.00156		0.56491	0.00123
0.6299	1.05996		0.67513	0.24542		0.565	0.00156		0.565	0.00123
0.61695	1.90794		0.61802	0.92822		0.5659	0.00156		0.5659	0.00123
0.63645	0.65371		0.6532	0.30981		0.56689	0.00156		0.56689	0.00123
0.66533	0.31853		0.68292	0.36757		0.56788	0.00156		0.56788	0.00123
0.65382	0.46603		0.50756	0.22812		0.56887	0.00156		0.56887	0.00123
0.64843	0.34222		0.61194	0.27025		0.56986	0.00156		0.56986	0.00123
0.62041	1.83764		0.65729	0.44169		0.57086	0.00156		0.57086	0.00123
0.68359	1.55237		0.6841	0.25413		0.57185	0.00156		0.57185	0.00123
0.62607	0.97372		0.63865	0.47641		0.57284	0.00156		0.57284	0.00123
0.629	0.54634		0.65824	0.91859		0.57383	0.00156		0.57383	0.00123
0.63909	0.35539		0.66329	0.68673		0.57482	0.00156		0.57482	0.00123
0.62121	0.33862		0.66875	0.48412		0.575	0.00156		0.575	0.00123
0.64977	0.22918		0.65859	0.75766		0.57581	0.00156		0.57581	0.00123
0.63007	0.71011		0.67609	0.83718		0.5768	0.00156		0.5768	0.00123
0.60566	0.44386		0.59149	1.61087		0.57779	0.00157		0.57779	0.00123
0.64997	1.04771		0.6289	0.63614		0.57878	0.00157		0.57878	0.00123
0.62842	0.74596		0.13634	0.24965		0.57977	0.00157		0.57977	0.00123
0.62294	0.77035		0.64819	0.7703		0.58077	0.00157		0.58077	0.00123
0.6373	0.83874		0.64789	1.23959		0.58176	0.00157		0.58176	0.00123
0.63871	0.56002		0.65048	0.75525		0.58275	0.00158		0.58275	0.00123
0.6297	2.48259		0.67371	0.28125		0.58374	0.00158		0.58374	0.00123
0.65499	0.20134		0.65817	0.54836		0.58473	0.00159		0.58473	0.00123
0.65509	0.25475		0.64322	0.23097		0.585	0.00159		0.585	0.00123
0.63632	0.79475		0.66061	1.03214		0.58572	0.0016		0.58572	0.00123
0.62614	0.78308		0.67021	0.4083		0.58671	0.00162		0.58671	0.00123
0.62719	0.22678		0.64542	0.72437		0.5877	0.00164		0.5877	0.00123
0.61839	0.25975		0.61572	0.39821		0.58869	0.00166		0.58869	0.00123
0.62605	1.0988		0.66416	1.84068		0.58968	0.0017		0.58968	0.00123
0.57475	0.90812		0.67168	0.67008		0.59068	0.00175		0.59068	0.00123
0.56261	0.8323		0.65865	0.27867		0.59167	0.00181		0.59167	0.00123
0.62126	1.02761		0.66482	0.50421		0.59266	0.00189		0.59266	0.00123
0.62894	0.63966		0.6678	0.53658		0.59365	0.002		0.59365	0.00123
0.60533	0.31343		0.66602	0.25598		0.59464	0.00214		0.59464	0.00123
0.62006	0.61002		0.68096	0.36751		0.595	0.0022		0.595	0.00123
0.63142	1.09222		0.63597	0.37596		0.59563	0.00232		0.59563	0.00123
0.64854	0.37052		0.66068	0.38411		0.59662	0.00254		0.59662	0.00123
0.61727	0.81146		0.6746	0.45802		0.59761	0.00283		0.59761	0.00123
0.6296	0.55773		0.67183	0.96395		0.5986	0.00319		0.5986	0.00123
0.61904	0.60285		0.64458	0.51229		0.59959	0.00364		0.59959	0.00123
0.62701	0.26403		0.5926	6.82187		0.60059	0.00421		0.60059	0.00123
0.62276	0.35934		0.65317	2.05722		0.60158	0.0049		0.60158	0.00123
0.64307	0.63085		0.64443	0.6524		0.60257	0.00575		0.60257	0.00123
0.61966	1.23904		0.70329	0.26008		0.60356	0.00678		0.60356	0.00123
0.58337	1.02322		0.61099	0.41782		0.60455	0.00803		0.60455	0.00123
0.6382	0.98348		0.66998	1.20508		0.605	0.00867		0.605	0.00123
0.62708	3.17943		0.65778	0.98434		0.60554	0.00953		0.60554	0.00124
0.61904	2.01936		0.62567	0.25107		0.60653	0.01131		0.60653	0.00124
0.62209	0.81653		0.62434	0.2625		0.60752	0.01343		0.60752	0.00124
0.62636	0.68439		0.61337	0.57549		0.60851	0.01592		0.60851	0.00125
0.62351	2.00573		0.66874	1.03142		0.6095	0.01883		0.6095	0.00126
0.58358	1.13086		0.69933	1.36587		0.6105	0.0222		0.6105	0.00127
0.57587	3.96877		0.65922	0.74996		0.61149	0.02608		0.61149	0.00129
0.61219	0.57006		0.66097	0.97432		0.61248	0.03052		0.61248	0.00131
0.68076	0.46277		0.66135	0.51099		0.61347	0.03555		0.61347	0.00135
0.63859	0.20686		0.65432	0.52165		0.61446	0.04122		0.61446	0.00139
0.62678	0.72309		0.64464	1.65936		0.615	0.0446		0.615	0.00141
0.61864	0.22529		0.65724	0.31138		0.61545	0.04756		0.61545	0.00144
0.62334	0.41511		0.65867	1.37902		0.61644	0.05459		0.61644	0.00151
0.61821	1.55109		0.64657	1.49011		0.61743	0.06232		0.61743	0.0016
0.63706	1.94405		0.61089	0.26628		0.61842	0.07077		0.61842	0.00172
0.63559	1.84233		0.65472	0.39095		0.61941	0.07991		0.61941	0.00187
0.633	0.68663		0.65486	0.29856		0.62041	0.08973		0.62041	0.00206
0.6279	0.30177		0.64535	1.36743		0.6214	0.10017		0.6214	0.0023
0.62454	1.26664		0.65184	0.62816		0.62239	0.1112		0.62239	0.0026
0.64615	0.2832		0.65842	1.23684		0.62338	0.12272		0.62338	0.00298
0.62352	0.68811		0.65815	1.13117		0.62437	0.13465		0.62437	0.00345
0.61348	0.93604		0.64074	0.23152		0.625	0.1424		0.625	0.00381
0.63084	0.34006		0.62299	0.42434		0.62536	0.14687		0.62536	0.00403
0.62917	1.56078		0.72793	0.33397		0.62635	0.15927		0.62635	0.00475
0.62254	4.30893		0.65577	0.84702		0.62734	0.17169		0.62734	0.00562
0.61486	2.58015		0.66217	2.18815		0.62833	0.18398		0.62833	0.00667
0.63154	1.24844		0.65171	0.92399		0.62932	0.19598		0.62932	0.00793
0.61641	2.09602		0.68563	0.26543		0.63032	0.20753		0.63032	0.00945
0.61634	0.75962		0.65729	0.75866		0.63131	0.21845		0.63131	0.01124
0.63603	1.46511		0.46202	0.35173		0.6323	0.22857		0.6323	0.01336
0.57785	2.35113		0.66351	0.86337		0.63329	0.23774		0.63329	0.01584
0.62972	1.69184		0.66441	0.37302		0.63428	0.2458		0.63428	0.01873
0.63433	0.23866		0.66131	0.39357		0.635	0.25089		0.635	0.02111
0.62196	0.36484		0.66368	1.41651		0.63527	0.25262		0.63527	0.02207
0.62441	0.92234		0.66235	1.25157		0.63626	0.25807		0.63626	0.0259
0.67793	0.24257		0.66999	0.5		0.63725	0.26207		0.63725	0.03027
0.61597	0.29542		0.65849	1.08217		0.63824	0.26453		0.63824	0.03521
0.62046	0.92218		0.67104	0.2156		0.63923	0.26542		0.63923	0.04077
0.62009	0.87632		0.65241	0.35307		0.64023	0.26472		0.64023	0.04697
0.63635	0.29897		0.68651	0.46433		0.64122	0.26245		0.64122	0.05384
0.61363	0.56864		0.65947	0.56816		0.64221	0.25863		0.64221	0.0614
0.64252	1.41163		0.66515	0.41127		0.6432	0.25335		0.6432	0.06964
0.62388	0.32689		0.66762	0.28643		0.64419	0.24669		0.64419	0.07857
0.61687	1.22059		0.66712	0.27855		0.645	0.24031		0.645	0.08636
0.61822	2.52335		0.65894	2.49708		0.64518	0.23878		0.64518	0.08815
0.61565	0.43044		0.65889	1.32271		0.64617	0.22974		0.64617	0.09837
0.44209	1.69427		0.65843	1.55552		0.64716	0.21972		0.64716	0.10916
0.60322	0.40857		0.68723	0.20793		0.64815	0.20889		0.64815	0.12046
0.61797	0.20317		0.64429	0.31582		0.64914	0.19741		0.64914	0.13218
0.62369	0.47781		0.65242	0.59062		0.65014	0.18545		0.65014	0.14424
0.609	0.6752		0.65545	1.07572		0.65113	0.17318		0.65113	0.1565
0.65699	0.32591		0.65595	1.2772		0.65212	0.16077		0.65212	0.16884
0.62384	0.98778		0.6658	0.68639		0.65311	0.14837		0.65311	0.18113
0.62009	0.4702		0.70496	0.21022		0.6541	0.13611		0.6541	0.19321
0.63581	1.46363		0.67952	0.22956		0.655	0.12522		0.655	0.20387
0.62231	0.26314		0.73841	0.29029		0.65509	0.12414		0.65509	0.20492
0.63114	2.52655		0.65227	1.33619		0.65608	0.11257		0.65608	0.2161
0.65191	0.41166		0.66257	1.39843		0.65707	0.10148		0.65707	0.22659
0.6557	0.30582		0.66991	0.3563		0.65806	0.09095		0.65806	0.23624
0.64031	0.3017		0.65227	0.64522		0.65905	0.08106		0.65905	0.24488
0.62066	6.60426		0.66552	0.53259		0.66005	0.07183		0.66005	0.2524
0.5884	0.26943		0.64319	0.64751		0.66104	0.06331		0.66104	0.25866
0.63908	1.37054		0.68925	0.2353		0.66203	0.05549		0.66203	0.26355
0.65408	0.87491		0.66499	0.73583		0.66302	0.04837		0.66302	0.26701
0.62532	0.27425		0.66748	1.81179		0.66401	0.04195		0.66401	0.26896
0.60254	0.2823		0.65515	0.38557		0.665	0.03621		0.665	0.26937
0.59065	2.11488		0.66228	1.86761		0.66599	0.0311		0.66599	0.26824
0.56884	1.43502		0.23218	1.94497		0.66698	0.02659		0.66698	0.26559
0.63476	0.61384		0.66985	0.33379		0.66797	0.02264		0.66797	0.26145
0.62176	0.44934		0.66469	0.38202		0.66896	0.01921		0.66896	0.25591
0.62724	1.21564		0.65458	0.57854		0.66995	0.01625		0.66995	0.24906
0.63121	0.7523		0.66872	0.36902		0.67095	0.01371		0.67095	0.241
0.62705	0.74415		0.64464	0.25024		0.67194	0.01155		0.67194	0.23187
0.62719	0.28379		0.66711	0.48273		0.67293	0.00973		0.67293	0.22181
0.63441	0.57246		0.66563	0.36724		0.67392	0.00819		0.67392	0.21098
0.57357	2.78711		0.60298	0.65633		0.67491	0.00692		0.67491	0.19953
0.61561	1.93987		0.66926	0.96226		0.675	0.00681		0.675	0.19847
0.55638	0.50265		0.66329	0.37993		0.6759	0.00586		0.6759	0.18763
0.63543	0.49689		0.64777	0.70746		0.67689	0.00499		0.67689	0.17544
0.62451	1.67512		0.68729	0.39705		0.67788	0.00428		0.67788	0.16311
0.64496	0.25305		0.58114	0.26181		0.67887	0.00371		0.67887	0.15078
0.63129	1.68614		0.6489	0.30282		0.67986	0.00324		0.67986	0.1386
0.61583	1.4365		0.65777	0.31916		0.68086	0.00287		0.68086	0.12669
0.63069	0.58132		0.6679	0.85594		0.68185	0.00257		0.68185	0.11515
0.64018	0.41396		0.54517	0.31449		0.68284	0.00234		0.68284	0.10408
0.62882	0.67932		0.68964	0.20804		0.68383	0.00216		0.68383	0.09355
0.61778	1.22116		0.64554	0.49539		0.68482	0.00202		0.68482	0.08362
0.63162	0.72377		0.6766	0.35788		0.685	0.00199		0.685	0.08188
0.63808	0.76021		0.66357	2.07563		0.68581	0.0019		0.68581	0.07433
0.62944	1.60562		0.68258	0.25296		0.6868	0.00182		0.6868	0.06572
0.64025	0.99094		0.65745	0.32947		0.68779	0.00175		0.68779	0.0578
0.62974	1.09087		0.65393	0.94594		0.68878	0.00171		0.68878	0.05056
0.62189	1.05604		0.66325	1.73171		0.68977	0.00167		0.68977	0.04401
0.63923	0.83604		0.65178	0.23895		0.69077	0.00164		0.69077	0.03811
0.61403	0.86833		0.66537	1.50756		0.69176	0.00162		0.69176	0.03284
0.62988	1.68995		0.66404	0.47736		0.69275	0.0016		0.69275	0.02817
0.62401	0.46332		0.65995	0.44294		0.69374	0.00159		0.69374	0.02405
0.62386	0.3407		0.67398	0.32209		0.69473	0.00158		0.69473	0.02046
0.6289	0.21435		0.18124	6.29406		0.695	0.00158		0.695	0.01956
0.62667	0.94436		0.65344	0.61124		0.69572	0.00158		0.69572	0.01733
0.61748	0.78413		0.65116	1.06215		0.69671	0.00157		0.69671	0.01464
0.6138	0.43586		0.66461	3.05563		0.6977	0.00157		0.6977	0.01233
0.66924	0.42247		0.64273	0.39983		0.69869	0.00157		0.69869	0.01037
0.62111	2.29152		0.67167	0.66762		0.69968	0.00157		0.69968	0.00871
0.63114	0.552		0.67646	0.70278		0.70068	0.00157		0.70068	0.00732
0.63439	0.46225		0.64162	0.31061		0.70167	0.00156		0.70167	0.00616
0.62978	1.37212		0.6503	0.26578		0.70266	0.00156		0.70266	0.00519
0.62834	1.00828		0.65784	0.61486		0.70365	0.00156		0.70365	0.0044
0.64902	0.39513		0.6568	0.4624		0.70464	0.00156		0.70464	0.00375
0.61994	0.2959		0.65014	1.49982		0.705	0.00156		0.705	0.00354
0.63349	0.3845		0.65609	2.24997		0.70563	0.00156		0.70563	0.00322
0.62096	1.19954		0.62893	0.38954		0.70662	0.00156		0.70662	0.00279
0.61965	0.3668		0.82474	0.23354		0.70761	0.00156		0.70761	0.00245
0.62249	2.73873		0.64716	1.27671		0.7086	0.00156		0.7086	0.00218
0.59242	1.07394		0.6616	0.57092		0.70959	0.00156		0.70959	0.00196
0.62214	0.80444		0.64949	1.63372		0.71059	0.00156		0.71059	0.00179
0.62074	2.02327		0.65419	1.82097		0.71158	0.00156		0.71158	0.00166
0.61439	1.37078		0.67089	0.91544		0.71257	0.00156		0.71257	0.00155
0.62468	1.399		0.73122	0.25414		0.71356	0.00156		0.71356	0.00147
0.63334	0.43637		0.64653	0.51639		0.71455	0.00156		0.71455	0.00141
0.6548	0.56583		0.61734	0.63892		0.715	0.00156		0.715	0.00139
0.61842	0.44761		0.66706	0.34275		0.71554	0.00156		0.71554	0.00137
0.63103	1.34346		0.56784	0.48785		0.71653	0.00156		0.71653	0.00133
0.61552	1.79046		0.66353	0.35023		0.71752	0.00156		0.71752	0.0013
0.60598	1.69225		0.66927	0.88776		0.71851	0.00156		0.71851	0.00128
0.62403	0.87011		0.65358	0.97829		0.7195	0.00156		0.7195	0.00127
0.57756	1.63471		0.67718	0.31105		0.7205	0.00156		0.7205	0.00126
0.63278	3.12288		0.66487	1.02734		0.72149	0.00156		0.72149	0.00125
0.63083	0.30784		0.59694	0.37854		0.72248	0.00156		0.72248	0.00124
0.6357	0.71171		0.65647	1.94443		0.72347	0.00156		0.72347	0.00124
0.62899	0.7694		0.6755	0.42288		0.72446	0.00156		0.72446	0.00123
0.61491	1.21598		0.6349	0.88452		0.725	0.00156		0.725	0.00123
0.63019	1.83669		0.73231	0.32775		0.72545	0.00156		0.72545	0.00123
0.80123	0.38012		0.65787	1.38355		0.72644	0.00156		0.72644	0.00123
0.61732	0.22977		0.65555	0.22234		0.72743	0.00156		0.72743	0.00123
0.64862	0.47876		0.66408	0.42362		0.72842	0.00156		0.72842	0.00123
0.6541	0.29204		0.66221	0.29445		0.72941	0.00156		0.72941	0.00123
0.63539	0.40414		0.6044	0.2983		0.73041	0.00156		0.73041	0.00123
0.65708	0.3506		0.66376	0.76521		0.7314	0.00156		0.7314	0.00123
0.65173	0.37873		0.3411	0.29399		0.73239	0.00156		0.73239	0.00123
0.61869	2.69819		0.65762	1.11516		0.73338	0.00156		0.73338	0.00123
0.57293	0.71908		0.6683	1.00373		0.73437	0.00156		0.73437	0.00123
0.62628	2.9344		0.64917	2.46299		0.735	0.00156		0.735	0.00123
0.62161	0.94731		0.66506	0.71891		0.73536	0.00156		0.73536	0.00123
0.62872	1.75107		0.64353	0.89289		0.73635	0.00156		0.73635	0.00123
0.62045	1.34131		0.61874	0.26942		0.73734	0.00156		0.73734	0.00123
0.63217	2.14424		0.6467	1.83145		0.73833	0.00156		0.73833	0.00123
0.625	1.17587		0.65366	0.22703		0.73932	0.00156		0.73932	0.00123
0.62	3.67514		0.35087	0.46691		0.74032	0.00156		0.74032	0.00123
0.61511	2.03463		0.64242	0.44625		0.74131	0.00156		0.74131	0.00123
0.62988	1.15231		0.66311	1.41099		0.7423	0.00156		0.7423	0.00123
0.63762	0.21904		0.68113	0.25766		0.74329	0.00156		0.74329	0.00123
0.63312	0.71172		0.6598	0.32304		0.74428	0.00156		0.74428	0.00123
0.63145	0.34578		0.6573	1.04517		0.745	0.00156		0.745	0.00123
0.63513	1.46502		0.66276	0.86372		0.74527	0.00156		0.74527	0.00123
0.62274	1.14807		0.66178	1.17136		0.74626	0.00156		0.74626	0.00123
0.62801	0.45567		0.67718	0.42098		0.74725	0.00156		0.74725	0.00123
0.63081	1.29781		0.66836	0.61758		0.74824	0.00156		0.74824	0.00123
0.61956	0.32819		0.67107	0.42503		0.74923	0.00156		0.74923	0.00123
0.62021	2.2526		0.63289	0.28305		0.75023	0.00156		0.75023	0.00123
0.61724	0.33166		0.68692	0.4463		0.75122	0.00156		0.75122	0.00123
0.62387	1.81164		0.63059	0.78425		0.75221	0.00156		0.75221	0.00123
0.6253	2.0839		0.64687	0.47447		0.7532	0.00156		0.7532	0.00123
0.63979	0.6589		0.6597	0.43861		0.75419	0.00156		0.75419	0.00123
0.63802	0.3352		0.65543	0.43712		0.755	0.00156		0.755	0.00123
0.63097	0.84721		0.67092	2.8605		0.75518	0.00156		0.75518	0.00123
0.63226	0.73894		0.68	0.32316		0.75617	0.00156		0.75617	0.00123
0.82393	0.28377		0.6314	0.4951		0.75716	0.00156		0.75716	0.00123
0.62334	1.65538		0.64119	0.94908		0.75815	0.00156		0.75815	0.00123
0.61959	1.54482		0.67059	0.84748		0.75914	0.00156		0.75914	0.00123
0.62244	0.68064		0.65692	0.30706		0.76014	0.00156		0.76014	0.00123
0.63675	0.26739		0.65612	0.27243		0.76113	0.00156		0.76113	0.00123
0.6329	0.61741		0.6492	1.05011		0.76212	0.00156		0.76212	0.00123
0.62878	1.25494		0.67095	0.39229		0.76311	0.00156		0.76311	0.00123
0.68227	0.37165		0.65966	0.33076		0.7641	0.00156		0.7641	0.00123
0.61408	0.54784		0.67787	0.84607		0.765	0.00156		0.765	0.00123
0.64177	0.79535		0.64165	0.27022		0.76509	0.00156		0.76509	0.00123
0.62359	2.38623		0.66054	0.41074		0.76608	0.00156		0.76608	0.00123
0.633	1.07587		0.6277	0.69514		0.76707	0.00156		0.76707	0.00123
0.60429	0.43078		0.65321	2.22817		0.76806	0.00156		0.76806	0.00123
0.62256	1.02748		0.67483	0.4038		0.76905	0.00156		0.76905	0.00123
0.63205	0.7621		0.66839	0.22777		0.77005	0.00156		0.77005	0.00123
0.6436	0.20633		0.66748	1.58256		0.77104	0.00156		0.77104	0.00123
0.61903	0.72726		0.63104	0.85834		0.77203	0.00156		0.77203	0.00123
0.74002	0.42607		0.66277	0.23707		0.77302	0.00156		0.77302	0.00123
0.6164	0.52357		0.65317	0.91531		0.77401	0.00156		0.77401	0.00123
0.59379	0.75501		0.67122	0.67272		0.775	0.00156		0.775	0.00123
0.62047	0.62726		0.68334	0.21612		0.77599	0.00156		0.77599	0.00123
0.641	0.36423		0.65447	0.92783		0.77698	0.00156		0.77698	0.00123
0.63953	0.92433		0.56764	0.41356		0.77797	0.00156		0.77797	0.00123
0.62786	0.50644		0.65108	1.6033		0.77896	0.00156		0.77896	0.00123
0.66356	0.21557		0.641	0.93166		0.77995	0.00156		0.77995	0.00123
0.63971	0.81203		0.66497	1.14059		0.78095	0.00156		0.78095	0.00123
0.62639	1.55334		0.641	1.7365		0.78194	0.00156		0.78194	0.00123
0.62348	4.03461		0.65796	0.81602		0.78293	0.00156		0.78293	0.00123
0.57869	1.10956		0.65738	0.68262		0.78392	0.00156		0.78392	0.00123
0.70545	1.49857		0.65284	0.66853		0.78491	0.00156		0.78491	0.00123
0.64094	0.38186		0.67602	1.80392		0.785	0.00156		0.785	0.00123
0.63846	1.49543		0.68852	0.50297		0.7859	0.00156		0.7859	0.00123
0.60822	0.49407		0.65963	0.61487		0.78689	0.00156		0.78689	0.00123
0.64032	0.60383		0.65629	0.73944		0.78788	0.00156		0.78788	0.00123
0.63703	0.3217		0.61839	1.0435		0.78887	0.00156		0.78887	0.00123
0.65199	0.64873		0.65702	1.99133		0.78986	0.00156		0.78986	0.00123
0.62224	0.64458		0.57157	0.74182		0.79086	0.00156		0.79086	0.00123
0.61842	0.41965		0.6393	3.18528		0.79185	0.00156		0.79185	0.00123
0.62652	1.25991		0.6842	0.90333		0.79284	0.00156		0.79284	0.00123
0.6354	1.29832		0.65429	0.75548		0.79383	0.00156		0.79383	0.00123
0.61544	0.41554		0.65701	1.04669		0.79482	0.00156		0.79482	0.00123
0.63962	0.2124		0.6778	0.27497		0.795	0.00156		0.795	0.00123
0.62835	0.84645		0.63802	0.79596		0.79581	0.00156		0.79581	0.00123
0.85618	0.31555		0.66786	0.36506		0.7968	0.00156		0.7968	0.00123
0.63978	0.81054		0.66295	0.54728		0.79779	0.00156		0.79779	0.00123
0.62401	0.22217		0.65366	0.45061		0.79878	0.00156		0.79878	0.00123
0.6306	0.26608		0.78325	0.32519		0.79977	0.00156		0.79977	0.00123
0.58449	0.39963		0.62787	0.2712		0.80077	0.00156		0.80077	0.00123
0.61401	0.38804		0.66296	0.89811		0.80176	0.00156		0.80176	0.00123
0.64771	0.3067		0.6665	0.53345		0.80275	0.00156		0.80275	0.00123
0.61828	1.34531		0.65103	0.59848		0.80374	0.00156		0.80374	0.00123
0.88241	0.23787		0.66317	0.26751		0.80473	0.00156		0.80473	0.00123
0.61395	1.84429		0.65979	1.17472		0.805	0.00156		0.805	0.00123
0.57978	0.61936		0.65935	0.45883		0.80572	0.00156		0.80572	0.00123
0.62591	0.61126		0.68211	0.23728		0.80671	0.00156		0.80671	0.00123
0.62312	1.70808		0.67309	0.31469		0.8077	0.00156		0.8077	0.00123
0.61961	0.62238		0.67523	0.25629		0.80869	0.00156		0.80869	0.00123
0.53536	0.23575		0.64991	0.48648		0.80968	0.00156		0.80968	0.00123
0.62003	1.16293		0.65099	0.65761		0.81068	0.00156		0.81068	0.00123
0.62763	1.53293		0.67012	1.02509		0.81167	0.00156		0.81167	0.00123
0.63054	0.71355		0.70484	0.51039		0.81266	0.00156		0.81266	0.00123
0.79651	1.46381		0.6313	1.04736		0.81365	0.00156		0.81365	0.00123
0.6089	0.24735		0.68977	0.25992		0.81464	0.00156		0.81464	0.00123
0.64192	0.27182		0.66283	0.56131		0.815	0.00156		0.815	0.00123
0.62503	2.40964		0.65301	1.38666		0.81563	0.00156		0.81563	0.00123
0.63344	0.81957		0.65405	0.22632		0.81662	0.00156		0.81662	0.00123
0.61674	0.72387		0.61461	0.92932		0.81761	0.00156		0.81761	0.00123
0.62018	1.48287		0.66268	0.23345		0.8186	0.00156		0.8186	0.00123
0.61594	0.69582		0.65621	1.74767		0.81959	0.00156		0.81959	0.00123
0.63882	0.57849		0.61204	0.24234		0.82059	0.00156		0.82059	0.00123
0.62898	0.30722		0.67652	0.34696		0.82158	0.00156		0.82158	0.00123
0.61635	0.50681		0.66365	0.66551		0.82257	0.00156		0.82257	0.00123
0.63077	0.27132		0.65674	0.79775		0.82356	0.00156		0.82356	0.00123
0.63784	0.92679		0.6063	0.52428		0.82455	0.00156		0.82455	0.00123
0.61988	0.98573		0.68557	0.28954		0.825	0.00156		0.825	0.00123
0.82765	0.26781		0.68197	0.23389		0.82554	0.00156		0.82554	0.00123
0.63739	1.73024		0.66574	0.56328		0.82653	0.00156		0.82653	0.00123
0.61704	1.35047		0.64664	0.41828		0.82752	0.00156		0.82752	0.00123
0.59155	3.31568		0.65051	0.58736		0.82851	0.00156		0.82851	0.00123
0.63272	1.13113		0.64849	0.53447		0.8295	0.00156		0.8295	0.00123
0.63247	0.62992		0.66121	0.78555		0.8305	0.00156		0.8305	0.00123
0.90882	0.23786		0.67502	0.29917		0.83149	0.00156		0.83149	0.00123
0.62877	0.55461		0.65334	0.73327		0.83248	0.00156		0.83248	0.00123
0.62336	2.30245		0.58732	1.39731		0.83347	0.00156		0.83347	0.00123
0.62301	0.92204		0.67515	0.59992		0.83446	0.00156		0.83446	0.00123
0.6361	1.074		0.65929	0.24291		0.835	0.00156		0.835	0.00123
0.61626	1.68853		0.60707	0.28855		0.83545	0.00156		0.83545	0.00123
0.58752	0.43441		0.6614	1.10635		0.83644	0.00156		0.83644	0.00123
0.64795	0.54345		0.65652	1.27796		0.83743	0.00156		0.83743	0.00123
0.62984	1.76306		0.65282	1.63426		0.83842	0.00156		0.83842	0.00123
0.59001	0.6134		0.67906	0.52854		0.83941	0.00156		0.83941	0.00123
0.62475	1.50974		0.70535	0.23379		0.84041	0.00156		0.84041	0.00123
0.62948	0.41857		0.60632	0.59933		0.8414	0.00156		0.8414	0.00123
0.63197	1.19553		0.50466	0.33514		0.84239	0.00156		0.84239	0.00123
0.61928	0.57697		0.42722	0.35156		0.84338	0.00156		0.84338	0.00123
0.63379	1.68785		0.6576	0.76332		0.84437	0.00156		0.84437	0.00123
0.61375	0.43448		0.65514	2.90793		0.845	0.00156		0.845	0.00123
0.8496	0.32802		0.66543	0.21204		0.84536	0.00156		0.84536	0.00123
0.62163	0.34796		0.65998	1.28625		0.84635	0.00156		0.84635	0.00123
0.63681	0.24802		0.66571	0.64696		0.84734	0.00156		0.84734	0.00123
0.57366	1.98409		0.6335	0.26392		0.84833	0.00156		0.84833	0.00123
0.61015	0.732		0.61451	0.38248		0.84932	0.00156		0.84932	0.00123
0.62124	0.47524		0.6609	1.19931		0.85032	0.00156		0.85032	0.00123
0.62029	0.78052		0.6165	0.32865		0.85131	0.00156		0.85131	0.00123
0.63249	4.91677		0.70587	0.28966		0.8523	0.00156		0.8523	0.00123
0.60332	0.32033		0.64979	0.87046		0.85329	0.00156		0.85329	0.00123
0.62884	0.86754		0.661	0.51602		0.85428	0.00156		0.85428	0.00123
0.6314	0.72243		0.66218	0.21468		0.855	0.00156		0.855	0.00123
0.64443	0.69194		0.55544	3.00158		0.85527	0.00156		0.85527	0.00123
0.64089	1.16456		0.68496	0.28654		0.85626	0.00156		0.85626	0.00123
0.62448	0.80127		0.65602	0.41668		0.85725	0.00156		0.85725	0.00123
0.62878	0.53887		0.68064	0.47066		0.85824	0.00156		0.85824	0.00123
0.62474	1.92421		0.67622	0.31519		0.85923	0.00156		0.85923	0.00123
0.62254	1.63865		0.66531	0.25429		0.86023	0.00156		0.86023	0.00123
0.62896	0.92363		0.63645	0.34992		0.86122	0.00156		0.86122	0.00123
0.63036	0.89754		0.67782	0.25251		0.86221	0.00156		0.86221	0.00123
0.63511	1.41462		0.65963	0.36961		0.8632	0.00156		0.8632	0.00123
0.61838	5.46341		0.66861	1.10603		0.86419	0.00156		0.86419	0.00123
0.62478	0.50839		0.68046	0.31221		0.865	0.00156		0.865	0.00123
0.62623	0.4657		0.64337	2.60013		0.86518	0.00156		0.86518	0.00123
0.62095	0.39966		0.65489	1.04617		0.86617	0.00156		0.86617	0.00123
0.611	0.23258		0.72112	0.25329		0.86716	0.00156		0.86716	0.00123
0.62203	0.53521		0.66556	0.38644		0.86815	0.00156		0.86815	0.00123
0.61619	0.30227		0.62677	0.99782		0.86914	0.00156		0.86914	0.00123
0.57968	0.56093		0.65903	0.90311		0.87014	0.00156		0.87014	0.00123
0.62947	1.25844		0.63942	0.40185		0.87113	0.00156		0.87113	0.00123
0.62796	0.71892		0.71097	0.26054		0.87212	0.00156		0.87212	0.00123
0.63303	2.63192		0.66047	1.36319		0.87311	0.00156		0.87311	0.00123
0.64988	0.33149		0.64907	0.44841		0.8741	0.00156		0.8741	0.00123
0.91303	0.21773		0.76221	0.22727		0.875	0.00156		0.875	0.00123
0.64346	0.41753		0.66595	0.90927		0.87509	0.00156		0.87509	0.00123
0.57401	0.56344		0.65275	0.90681		0.87608	0.00156		0.87608	0.00123
0.63381	1.93251		0.66213	0.61443		0.87707	0.00156		0.87707	0.00123
0.62684	0.76652		0.64463	0.22562		0.87806	0.00156		0.87806	0.00123
0.63452	1.5636		0.66489	0.60736		0.87905	0.00156		0.87905	0.00123
0.70166	0.25383		0.65194	0.77149		0.88005	0.00156		0.88005	0.00123
0.58449	1.15803		0.66882	0.25254		0.88104	0.00156		0.88104	0.00123
0.94914	0.20707		0.6693	0.408		0.88203	0.00156		0.88203	0.00123
0.63592	0.39591		0.66592	0.75062		0.88302	0.00156		0.88302	0.00123
0.59984	0.54064		0.29092	0.21845		0.88401	0.00156		0.88401	0.00123
0.65792	0.27819		0.64892	0.84337		0.885	0.00156		0.885	0.00123
0.62366	2.4645		0.62607	0.42643		0.885	0.00156		0.885	0.00123
0.59386	0.28155		0.65889	0.27366		0.88599	0.00156		0.88599	0.00123
0.57672	0.82796		0.66142	3.34838		0.88698	0.00156		0.88698	0.00123
0.61772	0.23969		0.65309	0.79522		0.88797	0.00156		0.88797	0.00123
0.62585	0.93474		0.65505	0.64076		0.88896	0.00156		0.88896	0.00123
0.62098	0.66763		0.66799	0.5387		0.88995	0.00156		0.88995	0.00123
0.5933	0.59801		0.6615	0.9294		0.89095	0.00156		0.89095	0.00123
0.64182	0.43174		0.6656	0.93227		0.89194	0.00156		0.89194	0.00123
0.61892	4.12584		0.63822	0.26543		0.89293	0.00156		0.89293	0.00123
0.62831	0.70389		0.6569	0.40214		0.89392	0.00156		0.89392	0.00123
0.63144	0.94149		0.14068	0.3299		0.89491	0.00156		0.89491	0.00123
0.62865	1.78447		0.79075	0.20473		0.895	0.00156		0.895	0.00123
0.63754	0.41596		0.54175	0.41943		0.8959	0.00156		0.8959	0.00123
0.604	1.0559		0.65643	0.79217		0.89689	0.00156		0.89689	0.00123
0.66909	0.74156		0.6682	0.66256		0.89788	0.00156		0.89788	0.00123
0.62711	2.16334		0.62955	0.88193		0.89887	0.00156		0.89887	0.00123
0.629	1.51159		0.67812	0.67488		0.89986	0.00156		0.89986	0.00123
0.69503	0.20439		0.66404	0.6435		0.90086	0.00156		0.90086	0.00123
0.61856	1.14355		0.68251	0.41824		0.90185	0.00156		0.90185	0.00123
0.55127	0.90753		0.67248	0.83426		0.905	0.00156		0.905	0.00123
0.5825	0.59585		0.65705	0.75049		0.915	0.00156		0.915	0.00123
0.59887	0.24761		0.65818	0.37916		0.925	0.00156		0.925	0.00123
0.62547	1.52327		0.66472	0.45463		0.935	0.00156		0.935	0.00123
0.62164	1.06868		0.65985	0.36993		0.945	0.00156		0.945	0.00123
0.61427	0.46488		0.65597	0.67985		0.955	0.00156		0.955	0.00123
0.63234	0.93016		0.65898	0.24345		0.965	0.00156		0.965	0.00123
0.62339	0.676		0.6634	0.4824		0.975	0.00156		0.975	0.00123
0.58457	0.51507		0.64656	1.03986		0.985	0.00156		0.985	0.00123
0.62291	0.82618		0.67567	0.20747		0.995	0.00156		0.995	0.00123
0.70768	0.48848		0.6419	0.23193
0.64782	0.30438		0.68059	0.66746
0.60942	1.00396		0.48381	0.24488
0.70909	0.52998		0.66624	0.23081
0.63493	0.5195		0.64342	1.05699
0.66608	0.37672		0.65529	0.33128
0.63643	1.04033		0.66104	0.63607
0.65364	0.28267		0.6573	0.91488
0.63126	0.54285		0.64818	1.02175
0.62195	0.86273		0.64182	0.50386
0.62403	0.55675		0.66732	0.54099
0.62078	0.41245		0.65147	1.49904
0.61521	0.59293		0.60277	0.33008
0.53689	0.8204		0.65527	0.84222
0.62632	1.35138		0.66826	0.35079
0.6448	0.51058		0.68763	0.57331
0.62797	1.2939		0.6807	0.22396
0.63187	1.30008		0.71239	0.22448
0.6112	0.21605		0.67139	0.74294
0.63498	0.72288		0.91958	0.25074
0.63033	1.62489		0.64896	0.23836
0.62385	0.81706		0.33264	0.28006
0.63645	2.5337		0.67694	1.41166
0.57577	0.70432		0.6674	0.55835
0.66748	0.21795		0.65505	0.41459
0.60291	0.49166		0.65552	0.73957
0.62107	0.34768		0.67112	0.44145
0.62605	1.26554		0.65117	0.74441
0.61348	1.03876		0.65856	1.47408
0.62807	0.33334		0.66676	1.30086
0.62234	0.85111		0.65392	0.25744
0.56319	1.85934		0.66518	0.931
0.65601	0.21275		0.6726	0.46314
0.75331	0.25117		0.66893	0.24034
0.64392	0.26684		0.66091	0.45539
0.63853	0.48045		0.65857	0.70827
0.63664	1.62128		0.68614	0.30253
0.62625	0.41528		0.65734	0.38111
0.62729	1.15039		0.64635	0.34315
0.64863	0.32015		0.44508	0.20656
0.63713	0.63524		0.6632	0.8309
0.58699	0.47999		0.73368	0.53314
0.61928	0.44909		0.62968	1.37083
0.63234	1.31656		0.66957	0.30225
0.63596	0.5226		0.65416	0.96205
0.63	0.6063		0.67215	0.47645
0.63788	0.22702		0.66178	3.23196
0.63172	2.6104		0.66415	0.37466
0.36999	0.70809		0.66421	2.13334
0.62455	1.46888		0.61073	0.25427
0.5816	0.34336		0.652	0.39218
0.61504	1.39776		0.64993	0.60025
0.65486	1.76365		0.6639	0.82976
0.62365	1.99645		0.63789	0.2306
0.60329	1.20958		0.66782	0.72805
0.62035	3.5194		0.65945	0.27345
0.66197	0.21133		0.66002	0.74191
0.65784	0.2346		0.63694	0.96416
0.64508	1.00393		0.65933	0.42617
0.81448	0.75663		0.66212	1.05882
0.57557	0.65493		0.66946	0.20624
0.58301	0.2143		0.66052	0.64795
0.61621	0.33475		0.66735	0.76555
0.64437	0.29997		0.65379	0.49629
0.64203	0.67807		0.66016	0.82291
0.62453	1.12682		0.68742	0.22204
0.63105	0.21987		0.65943	0.55598
0.62061	1.3223		0.6911	0.36997
0.64486	0.5653		0.67865	0.56774
0.61832	1.29036		0.66254	1.61986
0.62636	0.54568		0.65977	0.60162
0.63206	0.33448		0.65684	0.59794
0.63117	0.27235		0.68532	0.27812
0.61918	1.02858		0.73097	0.63929
0.62405	0.61518		0.66056	0.32886
0.63914	0.45002		0.64983	1.48114
0.63503	2.2435		0.65974	0.45112
0.64331	1.91585		0.67674	0.35899
0.82428	0.28563		0.67607	0.21419
0.62804	2.81098		0.70899	0.21298
0.59371	0.32333		0.43957	0.42752
0.62319	0.41679		0.73871	0.3099
0.63615	1.19793		0.6629	0.33623
0.6275	2.48771		0.66662	0.2198
0.93467	0.23089		0.64225	1.58485
0.61938	0.68668		0.65325	0.50559
0.63655	0.33077		0.67541	0.7837
0.64139	1.3139		0.68065	0.42146
0.81365	0.23423		0.64088	0.27228
0.85203	0.20038		0.6588	0.67507
0.62396	0.48657		0.65699	0.76631
0.62949	0.53551		0.65572	0.46362
0.60298	0.53719		0.65418	1.58642
0.84043	0.21914		0.64754	0.39473
0.59452	0.86721		0.66382	0.56709
0.63379	0.75918		0.67637	0.44554
0.61937	0.71114		0.66672	0.9644
0.32399	0.47575		0.65866	1.12626
0.63194	0.53575		0.65513	2.19926
0.63499	0.43546		0.65909	0.87983
0.63703	1.40646		0.68684	0.21167
0.66102	0.3051		0.69916	0.20245
0.63784	0.29466		0.65872	1.94215
0.60136	0.28365		0.65824	2.4784
0.61821	0.46295		0.64494	1.12708
0.61901	1.15246		0.67087	0.69249
0.62007	2.07119		0.68371	0.30474
0.60112	0.94715		0.66349	1.45579
0.39672	2.17984		0.65821	0.90128
0.63065	0.73587		0.67546	0.39802
0.6335	0.58473		0.69133	0.3081
0.62462	0.64634		0.65421	2.21205
0.62492	2.25291		0.65035	0.46738
0.63491	0.57355		0.65872	0.5225
0.62377	1.34649		0.62651	0.25731
0.64613	0.23066		0.67056	0.21156
0.61233	0.54917		0.67134	1.53805
0.61729	0.96173		0.66034	0.25036
0.62386	1.26349		0.65021	0.31024
0.89604	0.21543		0.66271	1.74622
0.64093	1.44048		0.65974	1.45081
0.59381	3.70454		0.65935	0.32061
0.66979	0.21488		0.64305	0.99728
0.6256	2.71303		0.65885	0.68736
0.63018	0.74352		0.65997	0.3983
0.63034	0.21173		0.63984	0.22994
0.62585	0.76505		0.6164	0.27104
0.61671	3.71494		0.63339	0.2139
0.63639	0.44699		0.6961	0.21214
0.77887	0.64362		0.73787	0.39317
0.65323	0.35635		0.62578	1.10649
0.6263	0.31485		0.64972	1.04278
0.63543	1.30037		0.66769	0.53462
0.62853	0.77672		0.65691	0.81038
0.63441	0.59391		0.57784	1.60588
0.60561	0.46537		0.67227	0.53787
0.57168	0.4042		0.66478	0.39771
0.56939	0.93634		0.66063	0.51874
0.61924	0.85396		0.64903	0.8732
0.78385	1.00216		0.67881	0.79857
0.6503	0.21777		0.66738	0.6383
0.61864	0.93077		0.63606	0.25174
0.63284	1.08157		0.65058	0.54447
0.63474	0.68762		0.66844	0.30709
0.63513	0.48841		0.67919	0.72313
0.63459	1.61988		0.64637	0.39322
0.67427	0.7343		0.66015	1.53062
0.59506	0.6227		0.62352	0.28216
0.64238	0.24413		0.65137	0.27421
0.66096	0.22314		0.44063	0.22729
0.65461	0.29498		0.66438	0.7235
0.6169	0.44096		0.64451	0.9498
0.61371	1.16762		0.66204	0.99803
0.60841	2.84284		0.64755	0.58964
0.64336	0.56301		0.65278	0.57769
0.64237	0.32691		0.66475	0.41677
0.61745	0.73228		0.66583	0.92468
0.58231	0.87579		0.66459	0.68165
0.70185	0.32559		0.66005	0.34205
0.63291	0.47886		0.65763	0.3265
0.6528	0.78837		0.69593	0.2313
0.66074	0.21246		0.6591	0.26528
0.62876	0.81848		0.63422	2.22632
0.62087	2.17383		0.66876	0.57483
0.58727	2.19116		0.66914	0.62412
0.61814	0.43573		0.58139	1.99762
0.62609	0.46533		0.67819	0.6609
0.60125	0.21033		0.66103	1.23525
0.6205	2.5707		0.656	0.30342
0.69734	2.37301		0.66854	0.52744
0.58949	0.33262		0.67226	1.33958
0.62268	0.64401		0.6633	0.59027
0.60297	0.36263		0.67952	0.44063
0.66107	0.20376		0.668	0.25553
0.63628	2.45016		0.64234	0.50127
0.62148	2.40836		0.67003	0.45205
0.62933	0.86546		0.65574	0.21216
0.58718	0.46853		0.66384	0.37118
0.58139	0.85072		0.65723	2.07525
0.6055	0.35568		0.69894	0.35486
0.63568	1.35532		0.67772	0.44166
0.61957	2.31938		0.60306	0.2067
0.61803	0.44293		0.67545	0.46642
0.6258	0.96005		0.64191	0.70391
0.80987	0.59686		0.65614	1.30839
0.64327	0.44698		0.65179	1.01364
0.61879	0.31179		0.62963	0.63407
0.6277	0.46674		0.65052	0.3728
0.64972	0.53427		0.64774	1.14367
0.63059	1.44477		0.65868	2.1539
0.6345	1.03793		0.68598	0.34909
0.62327	0.86779		0.64862	0.76266
0.63954	0.92782		0.64771	0.26266
0.61669	0.31242		0.6527	1.14015
0.81916	0.29653		0.67021	0.95471
0.64063	1.37841		0.66196	1.97405
0.72833	0.24151		0.65077	0.93802
0.62034	0.38291		0.61702	0.42459
0.77531	1.36979		0.69187	0.29343
0.89991	0.2132		0.66334	1.99948
0.65327	0.24297		0.65309	1.48254
0.62913	1.42786		0.66801	0.55996
0.63333	0.90299		0.69025	0.26188
0.63067	1.89206		0.65887	0.84241
0.6486	1.5255		0.66994	0.331
0.7278	0.56124		0.68718	0.30095
0.63456	1.08905		0.67413	0.56277
0.30556	0.34375		0.66308	0.27108
0.63022	0.53063		0.65177	0.38144
0.58486	0.52237		0.67767	0.53091
0.62564	3.57581		0.6455	0.22137
0.59703	0.29849		0.64772	0.45732
0.62086	0.719		0.66204	0.31262
0.63825	0.68342		0.66866	0.41391
0.607	0.23698		0.67432	0.72423
0.62381	0.382		0.67069	0.32944
0.38744	0.4771		0.65239	1.30311
0.63767	0.90853		0.66878	0.62615
0.59471	0.36457		0.64751	0.68585
0.62424	1.54124		0.66688	0.36795
0.82622	0.25002		0.6636	0.27768
0.57174	1.69881		0.66234	1.19012
0.58018	0.91992		0.66752	0.35835
0.61217	0.60767		0.6228	0.49117
0.6278	1.51795		0.70286	0.22685
0.8105	0.40767		0.66244	0.8012
0.62769	1.0476		0.61546	0.37896
0.61428	1.02144		0.66243	0.79959
0.64011	0.49488		0.69877	0.21251
0.61514	0.2584		0.69384	0.21995
0.31744	0.25558		0.6751	1.10744
0.62515	1.10855		0.65749	0.62014
0.33141	0.56023		0.65344	0.66763
0.63329	0.57232		0.64969	0.53027
0.62992	0.40505		0.6675	1.30192
0.63471	3.92358		0.66725	0.68826
0.65251	0.45115		0.68006	0.25293
0.63148	3.20185		0.65135	1.96417
0.6095	1.75979		0.66874	1.01627
0.63485	0.47878		0.66784	0.49849
0.67611	0.78252		0.65564	0.89633
0.63153	0.46348		0.64564	0.60726
0.58003	2.08394		0.67297	0.23979
0.62724	0.29946		0.71297	0.23885
0.62478	0.75643		0.6452	0.54519
0.64837	0.43984		0.66549	1.56655
0.63273	0.38712		0.65425	0.59478
0.6215	0.27666		0.67079	0.71041
0.64961	0.31588		0.67434	0.8922
0.6181	1.04432		0.67536	0.38278
0.62466	1.14836		0.65951	0.57848
0.83707	0.20272		0.65593	0.93869
0.60309	0.31716		0.66131	1.07367
0.59098	0.24416		0.63977	0.56612
0.6226	2.9406		0.66275	1.04745
0.63669	0.32348		0.63992	0.24265
0.6384	0.55952		0.66294	0.36883
0.63666	1.03708		0.6684	0.29755
0.61143	0.55298		0.67749	0.33815
0.62653	1.28827		0.66601	0.33956
0.62018	1.27472		0.57055	0.41062
0.83916	0.21334		0.57923	0.50096
0.6295	0.85301		0.70735	0.98337
0.63707	0.52029		0.63886	0.28591
0.63308	0.76415		0.67387	0.436
0.65271	0.26633		0.66866	0.5698
0.61487	0.38596		0.6774	0.26017
0.57752	0.70779		0.65852	1.82421
0.62797	0.57833		0.66621	0.49963
0.63111	2.88699		0.62918	0.79643
0.63355	0.24192		0.66763	1.92661
0.62447	1.06408		0.69268	0.44434
0.63108	0.77047		0.68815	0.34307
0.62575	1.62078		0.65708	0.60485
0.63744	0.41897		0.66518	0.21304
0.61746	0.81742		0.68027	0.38034
0.65587	0.63496		0.70572	0.2009
0.62217	3.40909		0.65623	0.87736
0.62607	1.45426		0.66542	0.56658
0.63237	1.25888		0.65892	1.18526
0.62739	1.771		0.66307	0.54837
0.58619	0.66115		0.66517	0.56731
0.63344	1.67162		0.67919	0.35245
0.62831	1.87932		0.68517	0.32995
0.58643	0.32204		0.67544	0.47014
0.6512	0.26325		0.66482	2.11306
0.60678	0.54116		0.66874	2.52925
0.64135	0.24269		0.65887	0.2879
0.62912	1.46826		0.65887	1.549
0.64289	0.95937		0.67549	0.71735
0.62167	1.26125		0.65955	0.47534
0.59916	0.25531		0.66179	0.64951
0.63177	1.51208		0.70504	0.27152
0.63983	0.24688		0.69035	0.22285
0.65805	0.38156		0.65205	1.16713
0.61843	0.65502		0.63713	0.20609
0.26069	0.92169		0.66602	0.51313
0.81647	0.29043		0.65266	0.57836
0.62031	3.85956		0.67715	0.30779
0.63829	0.54435		0.65907	0.39188
0.62668	0.51872		0.58343	0.69495
0.63679	1.43914		0.65997	1.61361
0.56874	0.60163		0.66529	0.33058
0.66813	0.23826		0.65612	0.59433
0.63566	1.4552		0.65622	0.23881
0.61926	2.54298		0.65857	0.91759
0.5742	1.15926		0.68696	0.30828
0.58333	0.8332		0.65501	0.50352
0.62531	1.7638		0.67206	0.25516
0.6301	1.00527		0.66749	0.68414
0.59776	0.3087		0.65176	0.73602
0.70776	1.67978		0.66133	0.32158
0.60921	0.73979		0.71274	0.23059
0.65423	0.27444		0.66875	1.35064
0.62365	0.26791		0.63619	0.27424
0.62009	0.29251		0.67138	0.51363
0.64107	0.40412		0.65909	1.29634
0.62526	1.85534		0.69728	0.24208
0.61969	0.40952		0.65272	0.43335
0.61823	0.63138		0.6714	0.6618
0.6196	1.03608		0.50488	0.57446
0.57786	1.19513		0.67319	0.42247
0.70706	1.74519		0.67548	0.73077
0.62616	2.9225		0.67239	0.54684
0.62564	0.43097		0.66049	0.39117
0.62903	0.39733		0.63369	0.54683
0.70777	0.39242		0.56133	0.87066
0.62352	0.4315		0.65185	1.2183
0.64286	0.26868		0.64796	0.37218
0.62005	1.70193		0.68037	0.33518
0.62271	2.42321		0.65237	0.98431
0.62991	0.87635		0.65986	0.2792
0.63737	0.2953		0.66812	0.70424
0.59252	0.43259		0.65799	0.67984
0.62892	0.22216		0.67166	0.76364
0.57433	8.06568		0.66952	0.20256
0.83056	0.35797		0.65743	1.08707
0.62651	0.43514		0.66399	1.12826
0.62241	0.32915		0.59993	0.31479
0.63483	3.3991		0.65283	0.69804
0.63386	1.44357		0.64823	0.5935
0.77078	0.32423		0.6828	0.63007
0.63388	1.39152		0.65043	0.69784
0.63087	1.34548		0.65906	0.26141
0.62456	0.91058		0.60273	2.00937
0.56901	1.13224		0.67671	0.21199
0.63369	0.80908		0.67822	0.40173
0.57606	2.09608		0.6668	0.91484
0.62779	0.60828		0.66334	0.26832
0.60726	0.34332		0.64561	0.51802
0.75913	1.44811		0.65148	1.17187
0.63335	0.67979		0.6662	0.65106
0.6311	4.5228		0.67735	0.58242
0.68514	0.87821		0.64692	0.38595
0.6198	1.39817		0.65381	1.32858
0.63817	1.67093		0.66761	0.60615
0.57468	3.91463		0.67044	0.54183
0.62475	2.02427		0.64399	0.30453
0.62522	1.645		0.67059	0.95055
0.71086	0.36648		0.6654	0.38699
0.63386	1.26353		0.68503	0.45621
0.62081	2.22797		0.65632	0.28062
0.64855	0.46694		0.65797	0.38321
0.63635	0.68771		0.62949	0.20143
0.65474	0.56484		0.66021	0.33838
0.64716	0.58678		0.66231	1.299
0.61943	0.64221		0.67295	0.25488
0.5656	0.50186		0.64672	0.67431
0.63445	0.35215		0.66549	0.40405
0.55982	0.20382		0.64154	0.35896
0.63517	2.64332		0.59469	0.33199
0.63085	0.75706		0.6525	1.18786
0.61233	0.94481		0.66653	0.46819
0.63896	1.01065		0.65254	0.86353
0.6223	0.64842		0.66385	0.30337
0.63373	1.39422		0.66053	1.68817
0.61873	0.31914		0.67476	0.25062
0.64872	0.45969		0.6641	1.38622
0.89051	0.20594		0.64967	0.2171
0.79619	0.47724		0.66275	0.67883
0.6225	0.71742		0.67997	0.55394
0.63544	1.96399		0.64237	0.32408
0.62371	0.8146		0.67745	0.32979
0.62645	0.90904		0.66162	0.82755
0.62413	1.47138		0.67769	1.07661
0.63671	1.00159		0.63235	0.85338
0.56868	1.64221		0.66925	0.2304
0.62847	1.99008		0.67395	0.2549
0.60872	1.27809		0.6882	0.25404
0.55533	0.60727		0.67275	0.65136
0.59373	0.45466		0.67043	0.75632
0.62757	0.96635		0.68005	0.30398
0.58393	1.25921		0.71266	0.21334
0.60833	1.07725		0.65532	2.16131
0.62608	3.1973		0.69104	0.33981
0.62874	0.4844		0.66859	0.45864
0.62008	1.02246		0.68454	0.27408
0.62286	0.51935		0.66967	0.33892
0.63174	0.39069		0.67284	0.45796
0.63946	0.37942		0.6711	0.26297
0.63724	1.24313		0.65951	2.62106
0.65441	0.38172		0.6603	0.33108
0.61556	0.82095		0.65267	1.30924
0.64007	0.67729		0.65228	0.88337
0.62959	0.8256		0.67009	0.4625
0.58057	0.51958		0.66785	1.02497
0.65829	0.26171		0.67029	0.47459
0.54066	0.29848		0.67586	0.24121
0.62706	0.66055		0.66586	0.69685
0.63837	0.50321		0.62194	0.22181
0.63251	1.17631		0.6898	0.20158
0.6362	1.13103		0.65128	0.68389
0.63056	0.54093		0.62196	1.85056
0.63536	0.55866		0.66482	0.43147
0.72116	0.80028		0.67044	0.78676
0.63303	0.815		0.66083	0.98645
0.62878	1.646		0.66244	1.08126
0.61457	0.22054		0.67307	0.21144
0.63872	0.37367		0.65603	0.5836
0.71901	0.5159		0.63386	0.27523
0.64779	0.66368		0.65315	1.53114
0.63437	0.96455		0.6479	0.81677
0.63074	1.46311		0.66225	0.40322
0.62593	0.31973		0.67169	0.512
0.66922	0.27287		0.33883	0.39931
0.62406	0.68308		0.69379	0.31667
0.63913	1.46279		0.5493	0.32844
0.62816	1.13858		0.64711	1.61498
0.71269	0.89437		0.67702	0.46381
0.60675	0.24589		0.66894	0.94609
0.51091	0.41843		0.66969	0.33655
0.64902	0.42407		0.6565	0.94676
0.6192	0.9686		0.65013	0.5746
0.64594	0.85007		0.67417	0.23003
0.58051	0.82506		0.67081	0.54491
0.62506	0.43306		0.67546	0.23728
0.62205	0.38107		0.67094	0.68775
0.63003	1.95696		0.65593	0.73127
0.63405	0.36418		0.64606	0.98334
0.49578	0.2149		0.66307	1.21135
0.83468	0.20287		0.65133	0.33156
0.60894	0.23191		0.62546	1.73087
0.6688	0.29571		0.66841	0.91004
0.62776	1.43406		0.65606	1.14711
0.6346	0.44771		0.66974	0.52213
0.64317	0.24361		0.67051	0.60533
0.54599	0.20103		0.67569	0.2488
0.63341	0.27225		0.62309	0.28647
0.62888	3.48714		0.66565	1.69367
0.64076	0.73516		0.67251	0.44794
0.61547	0.33194		0.62363	1.72236
0.63024	0.62289		0.66793	0.28256
0.35546	0.46026		0.67434	0.83955
0.6377	1.03283		0.66091	2.52688
0.66289	0.27894		0.65921	0.75912
0.64221	0.45131		0.65918	1.09353
0.64074	1.23434		0.66581	0.64579
0.64189	0.34009		0.65074	0.83402
0.64701	0.276		0.66451	0.63057
0.64143	0.63039		0.66656	1.40268
0.5784	4.37764		0.66378	0.89439
0.63131	2.51039		0.66675	0.99241
0.62371	0.43132		0.68876	0.26796
0.63803	0.3859		0.5712	0.53111
0.64379	0.42355		0.67028	0.60814
0.66567	0.559		0.65278	0.81524
0.57746	0.43302		0.6675	0.40272
0.62535	1.25893		0.65163	0.45341
0.64349	0.30282		0.65212	0.42761
0.64777	0.33836		0.65252	1.61883
0.5962	0.35866		0.65685	0.49011
0.64224	1.03178		0.63815	0.58759
0.64305	0.80258		0.65842	0.71252
0.60793	0.49545		0.63838	2.09633
0.63074	1.68653		0.65968	2.19108
0.62168	0.25047		0.65806	0.25532
0.6162	0.30798		0.66665	0.48147
0.63435	0.2712		0.7421	0.2136
0.61677	1.66376		0.66172	1.65995
0.63676	1.69306		0.65619	1.57048
0.63917	1.68687		0.67284	0.40605
0.63067	0.85717		0.66106	0.70793
0.61527	1.5314		0.66631	0.39085
0.61584	0.56067		0.64148	0.54491
0.63353	1.43047		0.66069	0.74773
0.62794	0.35511		0.66381	0.70716
0.62317	1.96595		0.65406	1.68775
0.63967	0.59973		0.66574	1.28393
0.61133	0.33067		0.64527	0.96549
0.63267	0.63904		0.6705	0.32707
0.63062	1.2879		0.65956	0.84009
0.65105	0.43341		0.6653	0.26086
0.63298	0.74452		0.65951	0.75125
0.63949	0.49906		0.66417	0.75961
0.59074	0.20849		0.6806	0.55595
0.63519	0.66731		0.66448	1.53625
0.61461	2.85675		0.60871	1.17174
0.62613	0.84788		0.6733	1.12697
0.62152	8.10522		0.66942	0.87918
0.61674	0.5593		0.65328	0.656
0.6195	0.33887		0.67324	1.30705
0.59023	0.83238		0.65839	0.59767
0.63426	0.43537		0.65526	0.31422
0.63294	1.41252		0.65427	0.96989
0.63433	2.75072		0.65386	0.84289
0.59412	2.85558		0.69215	0.23971
0.6272	0.3695		0.71074	0.21042
0.6392	0.33692		0.65382	0.55497
0.57078	0.73853		0.6329	0.60295
0.62381	0.79251		0.67249	0.29896
0.62843	0.33267		0.67221	0.99028
0.60737	0.21778		0.65915	0.35749
0.57515	0.38836		0.72216	0.26574
0.64591	0.3557		0.64518	0.66099
0.58179	0.43811		0.67808	0.30285
0.57342	0.31445		0.6507	0.27757
0.63197	0.24858		0.62009	3.21215
0.65258	0.43639		0.68273	0.43793
0.62194	1.42234		0.68706	0.27162
0.62588	0.98755		0.68075	0.41083
0.62535	0.21517		0.67104	0.85917
0.59573	0.48373		0.66265	0.74357
0.62704	1.10458		0.68475	0.23803
0.61769	0.41048		0.6604	0.61231
0.6213	1.35094		0.73272	0.20343
0.63411	0.25401		0.66154	1.02834
0.57732	2.52324		0.66205	1.08628
0.59427	0.24253		0.68628	0.41465
0.59479	0.56336		0.65441	0.31587
0.57483	1.8798		0.66876	0.72735
0.62354	0.48477		0.65391	0.91154
0.60607	0.73578		0.65878	0.29126
0.63054	1.37547		0.6987	0.28109
0.62537	0.29488		0.67501	0.20998
0.62774	0.32482		0.63801	0.39889
0.62329	0.75761		0.67902	0.33394
0.64309	0.55687		0.68905	0.21617
0.65975	0.50758		0.66426	0.97349
0.63086	1.16427		0.6635	1.45469
0.63383	0.53014		0.65578	3.09452
0.62338	0.78251		0.6572	1.76002
0.6229	0.4265		0.65198	0.39129
0.6123	0.44179		0.66733	0.20819
0.59939	0.21074		0.66139	1.12253
0.60564	0.43436		0.71528	0.20383
0.65072	0.8556		0.66492	0.30395
0.62665	0.39508		0.62906	0.59895
0.612	0.33388		0.65796	0.51366
0.65614	0.24093		0.67621	0.34344
0.63641	0.6067		0.66651	0.8612
0.62795	0.78353		0.77391	0.30914
0.64094	0.87576		0.62979	0.55343
0.63369	0.81162		0.66251	1.63587
0.78928	0.24915		0.67287	0.29116
0.88723	0.21251		0.64997	2.22836
0.62639	1.1823		0.6534	1.71244
0.60557	1.26487		0.65407	0.86352
0.64053	0.45601		0.64472	0.67882
0.64262	0.50859		0.6589	0.79139
0.6385	1.67183		0.60518	0.69455
0.63143	0.68701		0.68069	0.35943
0.61967	1.96232		0.62149	1.10357
0.64	1.00403		0.65744	1.6055
0.63336	0.53064		0.57923	0.42928
0.64231	2.43113		0.65444	1.88935
0.61933	0.26448		0.67631	0.244
0.63599	0.80114		0.6605	0.20927
0.63578	1.75129		0.67092	0.31376
0.62938	0.57841		0.66203	1.82631
0.59838	0.38784		0.66281	0.60373
0.32304	10.0037		0.69493	0.33634
0.65294	0.31424		0.66114	0.81461
0.6267	0.34352		0.65333	0.30562
0.64635	1.55252		0.6673	0.50558
0.61688	0.28148		0.65114	0.36236
0.66046	0.23093		0.65255	1.15037
0.60656	0.22631		0.65567	0.78485
0.6356	0.78453		0.64286	1.50044
0.63586	1.21309		0.66137	0.25048
0.63352	1.7671		0.68001	0.20193
0.62929	2.47602		0.64049	1.92327
0.63516	1.40619		0.6702	0.24248
0.64471	0.39828		0.66765	0.98291
0.62404	1.77453		0.59235	0.25464
0.62934	0.87914		0.66625	0.25913
0.49105	1.16712		0.72286	0.20985
0.63587	0.86104		0.66202	0.33146
0.62081	0.27525		0.66165	0.28174
0.62309	0.49585		0.66934	0.95794
0.90547	0.25818		0.58521	0.62623
0.63682	1.00176		0.69765	0.2395
0.63611	0.26395		0.69612	0.40938
0.61475	0.22287		0.65873	0.74058
0.63812	0.33472		0.65667	0.52713
0.64461	0.5199		0.6669	0.53098
0.62012	2.14726		0.65077	1.2112
0.62898	0.51538		0.64647	0.24315
0.62358	1.42482		0.68368	0.31534
0.61871	0.37573		0.65607	1.77077
0.62466	1.42054		0.6716	1.03276
0.60747	0.22901		0.67785	0.46563
0.64947	0.4287		0.66722	0.37833
0.62726	3.92176		0.66473	0.9623
0.62679	0.50665		0.67014	0.25474
0.62426	1.09903		0.67598	0.428
0.59426	0.24708		0.65939	1.19937
0.62522	2.02301		0.66106	0.2982
0.63113	0.74006		0.66401	0.8386
0.6345	0.38138		0.65725	0.39304
0.61079	0.22338		0.64891	0.32761
0.60262	0.27861		0.64499	1.15753
0.63338	1.20701		0.66923	0.3967
0.87675	0.25941		0.69449	0.20523
0.82071	0.26335		0.63941	0.69116
0.57276	0.24772		0.66156	1.16222
0.63441	1.03546		0.66136	0.92192
0.62578	0.35404		0.67406	0.29043
0.61955	0.87545		0.65471	1.1947
0.62872	0.81374		0.64362	0.87016
0.61991	0.6543		0.67002	0.69899
0.62222	4.42415		0.6525	0.31677
0.63716	0.81338		0.65608	0.93107
0.63674	0.54634		0.65554	0.97561
0.65324	0.37978		0.67916	0.20389
0.63377	1.10342		0.65495	0.51939
0.62263	0.38949		0.58633	0.49094
0.35705	0.31081		0.65223	0.29383
0.63966	1.44675		0.67521	0.2001
0.64125	1.53159		0.66715	0.79746
0.6083	0.29098		0.66352	0.2577
0.63176	0.6072		0.65868	0.84277
0.63458	1.08056		0.66144	1.18529
0.64876	0.35842		0.64326	0.55117
0.62338	1.05719		0.66118	0.63593
0.6298	2.00513		0.65791	0.35167
0.63416	0.30606		0.62989	0.37097
0.6213	0.97074		0.67949	0.21285
0.63391	0.9253		0.67495	1.29598
0.63365	0.34212		0.67707	0.24638
0.63039	0.57055		0.65559	0.41609
0.62744	0.62459		0.67114	0.27121
0.59339	0.44833		0.63285	1.43622
0.63008	0.84378		0.6515	0.31454
0.64504	0.22617		0.65966	0.34992
0.61487	0.66486		0.67929	0.40884
0.62431	1.18396		0.61805	0.32718
0.63531	1.38574		0.66508	0.55179
0.65797	0.55182		0.65951	2.32602
0.63124	0.5178		0.66589	0.57341
0.61846	1.7086		0.66638	0.40736
0.73289	0.21604		0.6751	0.2589
0.63292	0.81849		0.67097	0.28283
0.6233	0.67356		0.6511	0.69859
0.63263	0.27999		0.65115	0.49899
0.87554	0.20304		0.65303	2.378
0.60656	0.61189		0.66863	0.31665
0.65441	0.22866		0.6684	0.37169
0.62869	0.52824		0.64292	0.2282
0.62431	0.84483		0.67005	1.15546
0.64959	0.47576		0.64078	0.33349
0.65021	0.58654		0.65328	0.6266
0.72497	0.95124		0.65929	0.45462
0.66213	0.25145		0.63535	0.24
0.6257	3.81544		0.66922	0.70717
0.63633	1.41134		0.66335	0.39825
0.63175	0.54797		0.66276	0.54025
0.63021	0.42015		0.64596	2.5441
0.63857	0.73944		0.65767	0.40767
0.71205	0.80528		0.67931	0.20328
0.62958	0.44832		0.65339	2.47941
0.65566	0.36193		0.67073	0.56694
0.63007	0.49935		0.68523	0.46451
0.68158	0.21578		0.66214	0.33024
0.63151	0.86335		0.67901	0.35332
0.63683	2.12552		0.68178	0.31653
0.62013	0.2802		0.65042	0.50897
0.63659	1.6821		0.38945	0.31888
0.62165	2.52419		0.66809	0.69882
0.62697	1.30101		0.68033	0.2026
0.64461	1.11556		0.66716	0.51964
0.62319	0.97789		0.66078	0.55142
0.6256	1.71344		0.66069	0.96607
0.90168	0.21078		0.15122	0.24554
0.63433	0.71968		0.6749	0.38335
0.60471	0.45496		0.68027	0.38161
0.61588	0.27852		0.66144	0.96423
0.62417	1.45673		0.70947	0.20242
0.659	0.28394		0.66967	0.32849
0.6319	1.53119		0.66714	0.38421
0.61284	0.46732		0.6892	0.28212
0.61631	0.78358		0.66578	0.65156
0.63737	0.46505		0.6617	0.21491
0.89806	0.22944		0.64966	1.12036
0.63042	1.6559		0.54558	0.3561
0.59651	0.79519		0.67354	0.38095
0.61783	0.33545		0.67135	0.43856
0.63053	0.60798		0.68715	0.77608
0.63109	1.31231		0.70277	0.24301
0.62562	0.56077		0.66951	0.72335
0.60998	1.69181		0.65408	1.13274
0.8524	0.20637		0.66759	1.22337
0.6265	1.15484		0.65389	2.02208
0.56778	0.39777		0.69468	0.20848
0.63836	0.69673		0.18455	0.57038
0.62847	1.64368		0.65248	0.47086
0.6397	1.25574		0.67718	0.45444
0.65645	0.23339		0.6602	0.98203
0.6424	0.90513		0.70987	0.21621
0.62621	1.38798		0.66565	1.40217
0.62871	1.20056		0.68903	0.23132
0.63486	1.623		0.65429	0.7058
0.65088	0.79538		0.66881	0.45914
0.64149	0.33921		0.65262	0.48191
0.65481	0.38381		0.72707	0.22821
0.64107	0.25813		0.66397	1.54879
0.69207	0.25053		0.67954	1.75626
0.669	0.28258		0.65945	0.93519
0.63315	2.43067		0.65153	1.89588
0.68917	0.23057		0.65817	0.8676
0.62077	1.47346		0.52398	0.36271
0.65462	0.45466		0.66722	0.24602
0.64192	1.85293		0.69015	0.30381
0.60987	0.29723		0.65998	0.24622
0.6473	0.24985		0.64474	0.27858
0.61385	0.30153		0.6471	1.28201
0.63695	1.24718		0.64266	0.53762
0.74593	0.49653		0.66428	0.45039
0.63855	0.41871		0.68196	0.24635
0.60421	1.05394		0.63486	0.42555
0.63188	0.54682		0.65892	2.46717
0.63588	1.70322		0.65902	0.45088
0.6401	0.24323		0.6601	0.67119
0.64207	0.32753		0.66454	0.982
0.52793	0.25095		0.70405	0.23892
0.63522	0.55609		0.6684	0.57615
0.57654	0.64988		0.65007	2.73505
0.58769	0.86532		0.65454	1.23259
0.63681	1.69581		0.6691	1.56677
0.66726	0.33318		0.67564	0.34689
0.65984	0.51345		0.6512	0.73476
0.64618	0.84931		0.65102	0.74229
0.66848	1.16752		0.66044	0.50448
0.63667	0.82372		0.66738	0.49139
0.62384	0.22788		0.39695	0.24199
0.66297	0.30821		0.66381	0.28328
0.62753	0.23232		0.67477	0.64652
0.63724	0.48093		0.66979	0.283
0.66102	4.25899		0.66206	0.28644
0.64898	0.33611		0.65379	0.4314
0.68213	0.45681		0.65896	0.33608
0.65951	2.64605		0.65687	0.72554
0.62806	0.30501		0.6649	0.53149
0.66252	1.24029		0.65525	0.44435
0.56136	0.45696		0.62493	2.07922
0.67075	0.66654		0.63953	1.725
0.64965	1.01681		0.65098	0.79085
0.67378	0.84349		0.66574	0.45732
0.67344	1.66714		0.65905	1.23722
0.69478	0.47602		0.66203	0.38502
0.66823	1.01176		0.33995	0.23824
0.57135	0.75319		0.71811	0.50384
0.67408	0.41213		0.63885	2.12497
0.67593	0.24244		0.66606	1.16438
0.69207	0.46236		0.68259	0.21249
0.67058	2.72963		0.68176	0.78538
0.6292	0.4483		0.66597	0.53928
0.66583	1.28614		0.67213	0.34669
0.65372	1.20687		0.65158	0.64292
0.66993	0.42133		0.56204	2.15361
0.61784	0.45981		0.6614	0.99901
0.61629	2.59085		0.65758	0.9875
0.52056	0.24337		0.68014	0.39755
0.6651	1.10596		0.64749	0.90197
0.6682	0.98027		0.66099	0.63801
0.66287	0.92724		0.65353	0.53479
0.66509	0.45928		0.66146	0.89151
0.66228	0.97174		0.66241	0.35783
0.62001	0.50171		0.56858	0.45039
0.67678	0.44761		0.68551	0.3894
0.67478	0.37516		0.65406	0.62463
0.66695	0.79542		0.66014	1.50079
0.61607	0.96017		0.65513	0.88516
0.66218	1.30247		0.63771	0.71493
0.66408	1.65008		0.66004	0.3713
0.67281	1.16322		0.66408	0.24302
0.67041	0.68778		0.67694	0.30595
0.60857	0.27446		0.66112	0.78737
0.66839	1.02787		0.66549	0.79508
0.84653	0.64046		0.65251	0.83666
0.67121	1.11387		0.67584	0.24594
0.66538	1.06372		0.67892	0.37686
0.68248	0.94367		0.66793	0.25424
0.68909	0.29433		0.67042	1.24351
0.65757	2.60647		0.66116	1.27115
0.68382	0.25178		0.65283	2.49037
0.65593	0.55582		0.67086	0.50321
0.66486	0.78985		0.63689	0.33683
0.7223	0.38281		0.66944	1.30768
0.65486	0.78011		0.65789	0.49153
0.65157	0.90512		0.62002	0.59133
0.61867	0.20155		0.67244	0.33121
0.6658	0.47511		0.67528	0.45962
0.6541	0.51077		0.67664	0.43713
0.61117	1.07427		0.67844	0.26324
0.8806	0.21903		0.66922	0.51287
0.81202	0.36111		0.67514	0.22496
0.66898	0.40537		0.65382	0.69478
0.63323	0.51089		0.65512	1.09132
0.79276	0.21212		0.65288	1.24911
0.65667	1.52317		0.6551	1.44309
0.66429	0.4787		0.6631	1.65455
0.65987	0.94454		0.74401	0.20154
0.66574	0.86354		0.67229	0.24976
0.64454	0.24651		0.7119	0.24304
0.61867	0.211		0.6721	0.49996
0.64858	0.57372		0.67091	0.27507
0.63528	0.20272		0.67326	0.22568
0.66738	0.32302		0.65893	1.43355
0.65869	0.73233		0.73551	0.22282
0.67869	0.23328		0.65734	0.87542
0.65231	0.36634		0.65533	2.66263
0.65175	0.46025		0.59334	0.62314
0.61906	0.29347		0.65487	0.31499
0.64226	0.25597		0.65255	0.54329
0.68434	0.30754		0.5788	0.40251
0.70725	0.51926		0.66427	0.67935
0.66987	0.65771		0.65965	0.71356
0.81788	0.23511		0.65348	0.6449
0.66141	1.08372		0.5746	0.29802
0.67866	0.45279		0.66241	0.50795
0.66468	0.34846		0.66209	1.11109
0.68386	0.25633		0.65664	2.2157
0.70137	0.55206		0.66382	0.87468
0.65731	0.36517		0.65673	1.01414
0.66993	0.61546		0.53449	0.27962
0.66065	0.54719		0.67307	0.25163
0.66132	4.54773		0.67435	0.5357
0.65357	2.08842		0.67196	1.57676
0.97417	0.23583		0.68437	0.30632
0.63215	0.87897		0.66725	1.88336
0.6861	0.50155		0.66022	0.65589
0.63498	0.49605		0.66899	0.62692
0.66005	2.12177		0.65794	0.4183
0.65381	1.83622		0.64855	0.46885
0.65628	1.38703		0.68281	0.22859
0.72584	0.20386		0.66765	0.39492
0.67867	0.20044		0.65243	0.23374
0.66634	0.58594		0.67133	0.33947
0.58242	0.3414		0.66579	0.97738
0.42536	0.43638		0.64904	1.35196
0.53575	0.23271		0.65381	0.39738
0.63999	0.31142		0.65855	0.8635
0.63482	0.64224		0.67843	0.52894
0.65066	0.61567		0.6208	0.35351
0.62999	0.81958		0.67089	0.45223
0.62878	0.56387		0.65616	0.88738
0.64354	0.49028		0.67118	1.57924
0.63866	0.3831		0.66093	0.46645
0.62652	1.27258		0.64928	0.97337
0.61235	1.14591		0.66881	0.36672
0.62761	1.02581		0.67152	0.61597
0.63608	0.92275		0.65662	1.09442
0.62981	1.50323		0.67205	0.6007
0.63442	0.73432		0.66509	0.68587
0.62412	0.31577		0.67114	0.96339
0.62644	0.39016		0.67772	0.71615
0.68523	0.73457		0.65397	0.55083
0.6381	0.82054		0.6632	0.7823
0.63482	2.57514		0.65745	0.79489
0.63251	0.2332		0.65394	1.1791
0.64724	0.40479		0.67035	0.55537
0.63201	1.02782		0.47069	1.00812
0.6208	0.69557		0.67583	0.40652
0.62184	1.02938		0.65897	0.49587
0.6306	1.27806		0.63141	0.88705
0.64076	0.32927		0.65969	1.82717
0.64003	0.83767		0.68009	0.3096
0.62623	0.3599		0.66939	0.69505
0.56613	2.07264		0.6709	1.00378
0.64076	1.09404		0.67485	0.36162
0.62696	0.86573		0.54717	0.38806
0.63261	1.03601		0.67288	0.71293
0.6217	0.26302		0.67127	0.46264
0.62929	0.84829		0.65316	0.33782
0.62616	0.91825		0.66792	0.79946
0.64919	0.53949		0.64952	1.29835
0.64013	0.29654		0.67278	0.57208
0.64548	0.53525		0.66358	1.36311
0.64061	0.52642		0.65593	0.75886
0.64801	0.44404		0.51034	0.45978
0.729	0.2752		0.48259	0.32894
0.61723	0.43147		0.648	0.49853
0.6223	1.07996		0.68465	0.42979
0.63863	0.81497		0.66277	0.42483
0.6381	0.87243		0.658	0.73476
0.64407	0.34076		0.64279	1.05068
0.63073	1.73741		0.66113	0.73036
0.58298	0.24346		0.62736	0.25767
0.62761	0.68155		0.65149	1.6985
0.6305	0.73955		0.64242	0.54088
0.64228	1.15645		0.66098	1.23268
0.63508	0.32258		0.70853	0.67445
0.64358	0.38041		0.62874	1.93069
0.6263	0.49467		0.66777	1.25202
0.57127	0.95019		0.59804	0.40603
0.63041	0.37433		0.67457	0.73292
0.62311	0.448		0.6581	0.37089
0.62665	0.49474		0.66	1.05201
0.6422	0.25903		0.6576	0.76849
0.6299	0.6944		0.67284	0.29261
0.64801	0.61937		0.65313	0.20147
0.62135	0.43328		0.66612	0.36117
0.62488	0.79832		0.65739	0.66657
0.63954	0.6152		0.68927	0.30817
0.635	2.39932		0.66006	1.53668
0.64203	0.61535		0.67108	0.27155
0.6426	0.97061		0.65508	1.16952
0.63254	1.40976		0.67243	1.41939
0.61026	0.35681		0.63223	2.27221
0.56278	1.50026		0.65985	0.40003
0.63326	0.67983		0.68435	0.29075
0.63643	1.46324		0.66589	0.5797
0.9293	0.21092		0.65849	0.94029
0.55145	0.20242		0.67049	0.29604
0.60217	0.40986		0.67521	0.7426
0.65765	0.2739		0.67156	0.41967
0.63412	2.84726		0.64716	0.34797
0.79642	0.87102		0.6626	0.66627
0.63627	0.70233		0.66072	0.44969
0.61219	1.27167		0.66272	1.33379
0.6289	3.63545		0.66016	0.66242
0.62995	1.59904		0.64946	1.34176
0.62717	2.22258		0.67949	0.85911
0.63582	1.3362		0.65919	0.7339
0.64208	0.24263		0.64764	0.65285
0.65926	0.21695		0.66775	0.20617
0.62601	0.60851		0.68757	0.45536
0.6372	0.6335		0.66357	0.74877
0.62159	0.30783		0.70249	0.29539
0.63369	0.51627		0.6825	0.3304
0.62408	0.61662		0.65291	0.40993
0.63232	2.56754		0.67084	1.27993
0.61327	0.27429		0.66303	0.77036
0.63851	0.82432		0.67793	0.21165
0.62887	1.1797		0.6654	0.30777
0.72115	0.48259		0.66166	0.77037
0.61995	0.55341		0.67394	0.28313
0.73037	0.64436		0.6643	1.29249
0.64251	3.13989		0.66614	0.29024
0.62458	0.27917		0.652	0.59351
0.59479	0.73502		0.68764	0.24334
0.6385	0.79091		0.65569	0.75533
0.63131	0.31282		0.65367	1.61068
0.62114	0.43272		0.66227	1.03888
0.63958	0.38388		0.65135	1.25771
0.62186	0.46678		0.65849	1.66718
0.6307	0.23083		0.61748	0.76533
0.57671	0.86643		0.66212	0.65901
0.616	1.40745		0.65811	1.30703
0.65363	0.33993		0.66397	1.15103
0.67143	0.28149		0.66302	0.72945
0.62694	0.35172		0.66726	0.39847
0.63486	1.01281		0.65593	0.35072
0.62807	0.47063		0.66458	0.52827
0.65603	0.46749		0.65842	1.03156
0.64631	0.39465		0.64702	0.33519
0.62128	0.32592		0.64875	0.37413
0.62862	0.71461		0.6533	0.34452
0.60223	0.36922		0.68412	0.77592
0.64063	4.15599		0.67279	0.3094
0.63201	0.67936		0.65601	0.34426
0.62432	0.73333		0.6195	2.21108
0.62385	0.35431		0.68811	0.4739
0.62336	0.20979		0.65388	0.48714
0.61248	1.51268		0.63205	0.44637
0.61911	1.11572		0.6575	1.05556
0.64416	0.98629		0.67598	0.35848
0.62988	0.64236		0.66611	1.22167
0.65068	0.20189		0.69544	0.20024
0.63305	0.60767		0.66162	0.85051
0.84537	0.23359		0.68768	0.22722
0.6351	0.78969		0.6552	0.92026
0.6266	0.38867		0.62709	0.23657
0.62336	1.1951		0.66804	0.2287
0.63314	1.41487		0.6465	0.82889
0.65962	0.40389		0.65741	1.07711
0.6291	0.7172		0.67172	1.06728
0.62195	0.58862		0.65509	0.76794
0.63869	0.72275		0.6516	0.71876
0.62777	0.37915		0.66291	0.34662
0.64699	0.4122		0.6599	1.59042
0.63551	0.40347		0.67814	0.29863
0.6333	0.55596		0.66048	1.29372
0.63092	1.07118		0.67146	0.54683
0.65002	0.27901		0.65483	0.36068
0.64355	1.61587		0.66303	0.83096
0.6254	0.84063		0.6638	0.7284
0.62908	0.90492		0.66147	0.52953
[truncated: 14,078 more rows]

## Sheet: Fig. 2h
H41-10			H41-10R3(Cit)			Gaussian-fitting for H41-10			Gaussian-fitting for H41-10R3(Cit)			Mean Ib1/Io	Mean Ib2/Io	W1, h/2	W2, h/2	Rs
BlockDepth	Restime (ms)		BlockDepth	Restime (ms)		BlockDepth	Relative counts		BlockDepth	Relative counts		0.47072	0.61867	0.1201	0.08708	0.84013
0.51721	0.81962		0.6213	0.31005		0.005	9.78935E-4		0.005	0.00184
0.45665	0.32969		0.657	0.20567		0.015	9.78935E-4		0.00698	0.00184		K238C
0.59461	0.2328		0.66693	0.44277		0.02482	9.78935E-4		0.00797	0.00184
0.50577	0.85879		0.66429	0.99943		0.025	9.78935E-4		0.00896	0.00184
0.58901	0.20963		0.60471	0.42308		0.02878	9.78935E-4		0.00995	0.00184
0.55503	0.33043		0.65023	0.49456		0.02977	9.78935E-4		0.01095	0.00184
0.51509	1.30876		0.67427	0.2663		0.03077	9.78935E-4		0.01194	0.00184
0.46275	0.22295		0.67314	0.30972		0.03176	9.78935E-4		0.01293	0.00184
0.53368	0.34595		0.6413	0.54938		0.03275	9.78935E-4		0.01392	0.00184
0.50611	1.12288		0.69565	0.34293		0.03374	9.78935E-4		0.01491	0.00184
0.49881	0.22809		0.63811	0.35522		0.03473	9.78935E-4		0.015	0.00184
0.50175	1.21761		0.63954	0.40111		0.035	9.78935E-4		0.0159	0.00184
0.5588	0.55027		0.63962	0.21837		0.03572	9.78935E-4		0.01689	0.00184
0.49691	0.8647		0.6536	0.5246		0.03671	9.78935E-4		0.01788	0.00184
0.51397	0.26919		0.64912	0.95358		0.0377	9.78935E-4		0.01887	0.00184
0.52094	0.83105		0.65356	1.17531		0.03869	9.78935E-4		0.01986	0.00184
0.5369	0.49414		0.64218	0.78201		0.03968	9.78935E-4		0.02086	0.00184
0.48474	1.11646		0.64776	1.23778		0.04068	9.78935E-4		0.02185	0.00184
0.5055	0.81604		0.66413	1.15961		0.04167	9.78935E-4		0.02284	0.00184
0.47914	1.0404		0.63408	1.50773		0.04266	9.78935E-4		0.02383	0.00184
0.49535	1.39631		0.65644	0.56591		0.04365	9.78935E-4		0.02482	0.00184
0.48913	1.50969		0.70722	0.24325		0.04464	9.78935E-4		0.025	0.00184
0.49871	1.26863		0.67714	0.45182		0.045	9.78935E-4		0.02581	0.00184
0.49544	0.33856		0.62243	1.26974		0.04563	9.78935E-4		0.0268	0.00184
0.55849	0.21923		0.64265	1.05513		0.04662	9.78935E-4		0.02779	0.00184
0.50523	1.32119		0.6736	0.33189		0.04761	9.78935E-4		0.02878	0.00184
0.53627	0.29349		0.68024	0.20274		0.0486	9.78935E-4		0.02977	0.00184
0.54325	0.30533		0.6474	0.36957		0.04959	9.78935E-4		0.03077	0.00184
0.49617	0.45396		0.64192	0.32713		0.05059	9.78935E-4		0.03176	0.00184
0.53181	0.60377		0.67515	0.24114		0.05158	9.78935E-4		0.03275	0.00184
0.52538	0.47603		0.65236	2.05755		0.05257	9.78935E-4		0.03374	0.00184
0.51804	2.44351		0.65049	0.75813		0.05356	9.78935E-4		0.03473	0.00184
0.51953	1.81029		0.6654	0.32819		0.05455	9.78935E-4		0.035	0.00184
0.52214	0.49562		0.65082	1.90293		0.055	9.78935E-4		0.03572	0.00184
0.52789	1.15235		0.63425	0.3719		0.05554	9.78935E-4		0.03671	0.00184
0.50601	1.11548		0.66285	1.61778		0.05653	9.78935E-4		0.0377	0.00184
0.54052	0.29394		0.54127	4.43196		0.05752	9.78935E-4		0.03869	0.00184
0.44596	0.26295		0.6555	1.15776		0.05851	9.78935E-4		0.03968	0.00184
0.50721	0.28155		0.64819	0.94841		0.0595	9.78935E-4		0.04068	0.00184
0.49397	0.4327		0.65071	0.80594		0.0605	9.78935E-4		0.04167	0.00184
0.48052	0.86033		0.66055	0.92817		0.06149	9.78935E-4		0.04266	0.00184
0.50458	0.49742		0.92651	0.20616		0.06248	9.78935E-4		0.04365	0.00184
0.45797	0.58764		0.65738	1.60161		0.06347	9.78935E-4		0.04464	0.00184
0.48301	2.34371		0.80674	0.26241		0.06446	9.78935E-4		0.045	0.00184
0.49535	0.64359		0.95645	0.6006		0.065	9.78935E-4		0.04959	0.00184
0.51297	0.62697		0.71649	0.23178		0.06545	9.78935E-4		0.05455	0.00184
0.48202	1.26389		0.64733	0.44819		0.06644	9.78935E-4		0.055	0.00184
0.50216	1.174		0.66055	0.41863		0.06743	9.78935E-4		0.05554	0.00184
0.48705	0.75031		0.65678	0.20283		0.06842	9.78935E-4		0.065	0.00184
0.52461	0.88264		0.76806	0.2444		0.06941	9.78935E-4		0.075	0.00184
0.51481	1.52694		0.65076	1.6397		0.07041	9.78935E-4		0.085	0.00184
0.48576	0.71921		0.6397	1.14843		0.0714	9.78935E-4		0.095	0.00184
0.51897	0.29151		0.6462	0.36584		0.07239	9.78935E-4		0.10014	0.00184
0.46667	0.42166		0.65127	0.23605		0.07338	9.78935E-4		0.10113	0.00184
0.50365	1.97914		0.6465	7.94969		0.07437	9.78935E-4		0.10212	0.00184
0.47361	0.37078		0.64998	0.64484		0.075	9.78935E-4		0.10311	0.00184
0.49871	1.34826		0.64127	0.37659		0.07536	9.78935E-4		0.1041	0.00184
0.51884	1.23167		0.68436	0.25547		0.07635	9.78935E-4		0.105	0.00184
0.53944	0.32576		0.63919	1.30859		0.07734	9.78935E-4		0.10509	0.00184
0.51401	3.01825		0.67777	0.2264		0.07833	9.78935E-4		0.10608	0.00184
0.4871	0.52714		0.46178	5.29222		0.07932	9.78935E-4		0.10707	0.00184
0.49509	0.57438		0.63924	0.79147		0.08032	9.78935E-4		0.10806	0.00184
0.50063	1.21991		0.65048	1.82666		0.08131	9.78935E-4		0.10905	0.00184
0.52939	0.47614		0.63566	0.47861		0.0823	9.78935E-4		0.11005	0.00184
0.51549	3.08961		0.64319	0.9551		0.08329	9.78935E-4		0.11104	0.00184
0.50087	1.18852		0.66252	0.5349		0.08428	9.78935E-4		0.11203	0.00184
0.48628	0.62441		0.64459	0.58002		0.085	9.78935E-4		0.11302	0.00184
0.51802	0.41664		0.67738	0.34938		0.08527	9.78935E-4		0.11401	0.00184
0.49682	0.84807		0.65434	0.45582		0.08626	9.78935E-4		0.115	0.00184
0.4489	1.80692		0.63998	0.22658		0.08725	9.78935E-4		0.115	0.00184
0.49502	0.66601		0.63371	0.56209		0.08824	9.78935E-4		0.11599	0.00184
0.51404	0.23493		0.67129	0.27738		0.08923	9.78935E-4		0.11698	0.00184
0.5283	0.25658		0.66902	0.37945		0.09023	9.78935E-4		0.11797	0.00184
0.54233	0.38667		0.63654	1.05961		0.09122	9.78935E-4		0.11896	0.00184
0.52987	0.22704		0.64319	0.61643		0.09221	9.78935E-4		0.11995	0.00184
0.50512	0.58507		0.642	1.03826		0.0932	9.78935E-4		0.12095	0.00184
0.51572	3.36626		0.95615	0.67543		0.09419	9.78935E-4		0.12194	0.00184
0.50636	1.15613		0.95747	0.27628		0.095	9.78935E-4		0.12293	0.00184
0.50021	0.26567		0.38404	0.44827		0.09518	9.78935E-4		0.12392	0.00184
0.67369	0.27973		0.63418	0.73579		0.09617	9.78935E-4		0.12491	0.00184
0.49071	1.32885		0.53633	0.25983		0.09716	9.78935E-4		0.125	0.00184
0.58342	0.2157		0.65796	1.69705		0.09815	9.78935E-4		0.1259	0.00184
0.51352	0.67389		0.62038	0.23575		0.09914	9.78935E-4		0.12689	0.00184
0.48982	1.09985		0.62958	0.39847		0.10014	9.78935E-4		0.12788	0.00184
0.51813	0.37652		0.64858	1.57439		0.10113	9.78935E-4		0.12887	0.00184
0.49664	0.82707		0.93671	0.23503		0.10212	9.78935E-4		0.12986	0.00184
0.48309	1.69633		0.64173	0.72244		0.10311	9.78935E-4		0.13086	0.00184
0.49631	0.4058		0.64401	1.25542		0.1041	9.78935E-4		0.13185	0.00184
0.55449	0.23354		0.67369	0.51874		0.105	9.78935E-4		0.13284	0.00184
0.515	0.44668		0.65094	2.31951		0.10509	9.78935E-4		0.13383	0.00184
0.48324	0.87708		0.07081	0.42769		0.10608	9.78935E-4		0.13482	0.00184
0.45643	0.59205		0.65524	0.45519		0.10707	9.78935E-4		0.135	0.00184
0.46823	0.27237		0.65948	0.276		0.10806	9.78935E-4		0.13581	0.00184
0.50288	1.21622		0.6143	1.6202		0.10905	9.78935E-4		0.1368	0.00184
0.44465	1.10854		0.63767	0.87367		0.11005	9.78935E-4		0.13779	0.00184
0.49761	0.42721		0.64006	0.45084		0.11104	9.78935E-4		0.13878	0.00184
0.40129	0.22358		0.65702	0.53184		0.11203	9.78935E-4		0.13977	0.00184
0.52465	0.83878		0.64761	0.52239		0.11302	9.78935E-4		0.14077	0.00184
0.51265	0.68223		0.62618	0.31888		0.11401	9.78935E-4		0.14176	0.00184
0.50145	1.0438		0.46533	0.60405		0.115	9.78935E-4		0.14275	0.00184
0.49024	0.7524		0.64755	0.24108		0.115	9.78935E-4		0.14374	0.00184
0.44115	0.25024		0.67065	0.23399		0.11599	9.78935E-4		0.14473	0.00184
0.52551	2.96814		0.65077	0.98831		0.11698	9.78935E-4		0.145	0.00184
0.55584	0.31501		0.1361	1.26165		0.11797	9.78935E-4		0.14572	0.00184
0.48015	1.17113		0.65965	0.64654		0.11896	9.78935E-4		0.14671	0.00184
0.52045	1.89516		0.68555	0.20008		0.11995	9.78935E-4		0.1477	0.00184
0.49256	0.62743		0.65735	0.79796		0.12095	9.78935E-4		0.14869	0.00184
0.53674	1.06904		0.6534	0.64355		0.12194	9.78935E-4		0.14968	0.00184
0.51668	0.41385		0.42541	0.31894		0.12293	9.78935E-4		0.15068	0.00184
0.49899	0.66712		0.52972	0.34003		0.12392	9.78935E-4		0.15167	0.00184
0.49414	1.62323		0.64995	0.54366		0.12491	9.78935E-4		0.15266	0.00184
0.51345	1.19527		0.65656	1.54515		0.125	9.78935E-4		0.15365	0.00184
0.49571	1.08359		0.64379	1.25152		0.1259	9.78935E-4		0.15464	0.00184
0.51004	0.39555		0.6586	1.67064		0.12689	9.78935E-4		0.155	0.00184
0.51358	0.42242		0.65137	0.33542		0.12788	9.78935E-4		0.15563	0.00184
0.52086	0.38733		0.58566	0.28962		0.12887	9.78935E-4		0.15662	0.00184
0.49212	0.57896		0.68992	0.2187		0.12986	9.78935E-4		0.15761	0.00184
0.48658	1.26739		0.6808	0.38169		0.13086	9.78935E-4		0.1586	0.00184
0.52009	1.26383		0.63696	1.1405		0.13185	9.78935E-4		0.15959	0.00184
0.46425	1.03548		0.31814	0.63154		0.13284	9.78935E-4		0.16059	0.00184
0.52035	0.58034		0.56986	0.74127		0.13383	9.78935E-4		0.16158	0.00184
0.50973	0.45054		0.6485	0.53151		0.13482	9.78935E-4		0.16257	0.00184
0.51135	3.44714		0.64749	0.79223		0.135	9.78935E-4		0.16356	0.00184
0.59307	0.34569		0.56771	0.21062		0.13581	9.78935E-4		0.16455	0.00184
0.52705	0.32073		0.75282	0.2039		0.1368	9.78935E-4		0.165	0.00184
0.4993	0.32095		0.69041	0.24283		0.13779	9.78935E-4		0.16554	0.00184
0.52635	0.69079		0.66866	0.37702		0.13878	9.78935E-4		0.16653	0.00184
0.52323	3.02967		0.64467	0.7727		0.13977	9.78935E-4		0.16752	0.00184
0.48078	0.65711		0.64897	0.28697		0.14077	9.78935E-4		0.16851	0.00184
0.50507	2.56685		0.4164	0.52407		0.14176	9.78935E-4		0.1695	0.00184
0.50266	1.55839		0.64909	0.69616		0.14275	9.78935E-4		0.1705	0.00184
0.50085	0.25724		0.65412	0.41602		0.14374	9.78935E-4		0.17149	0.00184
0.51988	1.00976		0.51668	0.44324		0.14473	9.78935E-4		0.17248	0.00184
0.49959	0.28677		0.67119	0.3481		0.145	9.78935E-4		0.17347	0.00184
0.4372	0.49932		0.64427	1.65442		0.14572	9.78935E-4		0.17446	0.00184
0.37419	2.94392		0.62022	1.92794		0.14671	9.78935E-4		0.175	0.00184
0.51154	0.83491		0.63512	0.66239		0.1477	9.78935E-4		0.17545	0.00184
0.50109	2.77793		0.66063	0.29139		0.14869	9.78936E-4		0.17644	0.00184
0.5113	2.1971		0.642	0.67124		0.14968	9.78936E-4		0.17743	0.00184
0.47659	2.87885		0.65292	0.22746		0.15068	9.78936E-4		0.17842	0.00184
0.47878	0.27648		0.64787	1.19655		0.15167	9.78936E-4		0.17941	0.00184
0.5854	0.20918		0.75594	0.23503		0.15266	9.78936E-4		0.18041	0.00184
0.51905	1.00913		0.65289	1.00894		0.15365	9.78936E-4		0.1814	0.00184
0.50198	0.36498		0.66063	0.53974		0.15464	9.78936E-4		0.18239	0.00184
0.4712	0.93104		0.64056	2.29398		0.155	9.78936E-4		0.18338	0.00184
0.50704	2.31725		0.64684	0.5409		0.15563	9.78936E-4		0.18437	0.00184
0.52179	0.84639		0.6482	0.80312		0.15662	9.78936E-4		0.185	0.00184
0.51412	0.79223		0.70717	0.56413		0.15761	9.78936E-4		0.18536	0.00184
0.50807	1.91852		0.61385	0.94746		0.1586	9.78936E-4		0.18635	0.00184
0.52749	0.43555		0.68337	0.34851		0.15959	9.78936E-4		0.18734	0.00184
0.50727	0.51128		0.67182	0.28668		0.16059	9.78936E-4		0.18833	0.00184
0.51953	0.61417		0.63253	1.33822		0.16158	9.78936E-4		0.18932	0.00184
0.52831	1.83416		0.52039	0.57123		0.16257	9.78936E-4		0.19032	0.00184
0.50277	0.71155		0.62731	0.57104		0.16356	9.78936E-4		0.19131	0.00184
0.49426	1.82918		0.649	0.34633		0.16455	9.78936E-4		0.1923	0.00184
0.53835	0.32066		0.67109	0.24347		0.165	9.78936E-4		0.19329	0.00184
0.54814	0.26296		0.65856	0.67754		0.16554	9.78937E-4		0.19428	0.00184
0.53526	1.00778		0.71311	0.52555		0.16653	9.78937E-4		0.195	0.00184
0.52136	2.00997		0.65709	0.79809		0.16752	9.78937E-4		0.19527	0.00184
0.50137	1.05596		0.6343	1.33697		0.16851	9.78937E-4		0.19626	0.00184
0.504	0.76644		0.65714	0.4703		0.1695	9.78937E-4		0.19725	0.00184
0.50315	3.68331		0.652	0.55354		0.1705	9.78937E-4		0.19824	0.00184
0.49677	0.79565		0.68953	0.23886		0.17149	9.78938E-4		0.19923	0.00184
0.51467	1.22219		0.64251	2.4217		0.17248	9.78938E-4		0.20023	0.00184
0.51999	0.60588		0.6868	0.28632		0.17347	9.78938E-4		0.20122	0.00184
0.49462	1.31986		0.6623	0.74134		0.17446	9.78939E-4		0.20221	0.00184
0.4956	0.46022		0.64102	0.48272		0.175	9.78939E-4		0.2032	0.00184
0.51143	0.72341		0.64993	1.63274		0.17545	9.78939E-4		0.20419	0.00184
0.49087	0.25489		0.65691	0.24667		0.17644	9.7894E-4		0.205	0.00184
0.51492	0.68603		0.63038	0.4303		0.17743	9.7894E-4		0.20518	0.00184
0.5063	0.97117		0.64596	0.2022		0.17842	9.78941E-4		0.20617	0.00184
0.54823	0.40223		0.65682	0.20056		0.17941	9.78941E-4		0.20716	0.00184
0.56295	0.23453		0.64933	0.28918		0.18041	9.78942E-4		0.20815	0.00184
0.45268	0.79106		0.64882	0.34368		0.1814	9.78943E-4		0.20914	0.00184
0.4853	0.70218		0.64397	0.57446		0.18239	9.78943E-4		0.21014	0.00184
0.46793	0.90207		0.56927	0.27162		0.18338	9.78944E-4		0.21113	0.00184
0.46125	0.89065		0.64879	0.24418		0.18437	9.78945E-4		0.21212	0.00184
0.51395	0.78858		0.66111	1.02296		0.185	9.78946E-4		0.21311	0.00184
0.49118	0.4067		0.67581	0.23083		0.18536	9.78947E-4		0.2141	0.00184
0.52802	0.8577		0.59373	0.25778		0.18635	9.78948E-4		0.215	0.00184
0.50408	0.53965		0.68041	1.12801		0.18734	9.78949E-4		0.21509	0.00184
0.51183	0.65339		0.65593	0.41878		0.18833	9.78951E-4		0.21608	0.00184
0.50795	6.08476		0.63286	1.1403		0.18932	9.78953E-4		0.21707	0.00184
0.48928	0.86502		0.61246	0.33091		0.19032	9.78955E-4		0.21806	0.00184
0.50176	2.79703		0.64567	1.0154		0.19131	9.78957E-4		0.21905	0.00184
0.45021	1.21364		0.66532	0.37806		0.1923	9.78959E-4		0.22005	0.00184
0.5151	0.41502		0.69635	0.20919		0.19329	9.78962E-4		0.22104	0.00184
0.5008	0.52323		0.65409	0.86653		0.19428	9.78965E-4		0.22203	0.00184
0.49596	1.44605		0.55988	0.73951		0.195	9.78967E-4		0.22302	0.00184
0.51515	0.57628		0.47808	0.2141		0.19527	9.78968E-4		0.22401	0.00184
0.50373	0.47209		0.7048	0.47186		0.19626	9.78972E-4		0.225	0.00184
0.53752	0.30679		0.65899	0.57474		0.19725	9.78976E-4		0.225	0.00184
0.50491	1.34321		0.6844	0.45479		0.19824	9.7898E-4		0.22599	0.00184
0.554	0.31044		0.35097	1.49662		0.19923	9.78985E-4		0.22698	0.00184
0.50401	0.90696		0.6829	0.39012		0.20023	9.7899E-4		0.22797	0.00184
0.522	0.66726		0.63973	0.77991		0.20122	9.78996E-4		0.22896	0.00184
0.49637	0.61081		0.62604	1.24347		0.20221	9.79003E-4		0.22995	0.00184
0.49872	0.91179		0.69591	0.29964		0.2032	9.7901E-4		0.23095	0.00184
0.52419	0.62947		0.64737	0.76244		0.20419	9.79018E-4		0.23194	0.00184
0.49465	1.31814		0.67218	0.80936		0.205	9.79025E-4		0.23293	0.00184
0.51971	0.93665		0.65649	0.26752		0.20518	9.79027E-4		0.23392	0.00184
0.5236	0.56752		0.64493	0.50036		0.20617	9.79037E-4		0.23491	0.00184
0.51442	1.78439		0.64872	0.92829		0.20716	9.79048E-4		0.235	0.00184
0.51968	0.40723		0.5183	1.6043		0.20815	9.79059E-4		0.2359	0.00184
0.52057	0.63665		0.6483	0.96574		0.20914	9.79072E-4		0.23689	0.00184
0.48355	1.56537		0.65771	1.42179		0.21014	9.79087E-4		0.23788	0.00184
0.50366	0.68143		0.66542	0.25129		0.21113	9.79102E-4		0.23887	0.00184
0.50272	0.90289		0.64223	0.30467		0.21212	9.7912E-4		0.23986	0.00184
0.5433	0.26646		0.6474	0.89535		0.21311	9.79139E-4		0.24086	0.00184
0.49967	1.85578		0.67443	0.32175		0.2141	9.7916E-4		0.24185	0.00184
0.51705	0.24398		0.6447	0.63751		0.215	9.79181E-4		0.24284	0.00184
0.50145	0.4666		0.64448	0.96216		0.21509	9.79183E-4		0.24383	0.00184
0.50749	0.42567		0.65033	0.43402		0.21608	9.79208E-4		0.24482	0.00184
0.31755	0.54314		0.64886	0.81937		0.21707	9.79236E-4		0.245	0.00184
0.53211	0.71733		0.64177	0.43934		0.21806	9.79266E-4		0.24581	0.00184
0.521	0.80523		0.7263	0.48858		0.21905	9.793E-4		0.2468	0.00184
0.51723	1.33595		0.70049	0.2349		0.22005	9.79336E-4		0.24779	0.00184
0.50485	0.63213		0.58742	0.78644		0.22104	9.79376E-4		0.24878	0.00184
0.50732	1.6827		0.66575	0.44652		0.22203	9.7942E-4		0.24977	0.00184
0.50793	1.28815		0.64026	0.75083		0.22302	9.79468E-4		0.25077	0.00184
0.50226	0.25639		0.65662	0.43943		0.22401	9.79521E-4		0.25176	0.00184
0.52088	1.18742		0.74656	0.8034		0.225	9.79579E-4		0.25275	0.00184
0.49779	1.36434		0.64548	0.80074		0.225	9.79579E-4		0.25374	0.00184
0.52634	0.54754		0.6444	0.33086		0.22599	9.79641E-4		0.25473	0.00184
0.48131	3.609		0.62051	0.35882		0.22698	9.7971E-4		0.255	0.00184
0.46522	0.69901		0.6555	1.69761		0.22797	9.79786E-4		0.25572	0.00184
0.51561	1.20072		0.64341	0.49786		0.22896	9.79868E-4		0.25671	0.00184
0.51403	1.78367		0.66288	0.77464		0.22995	9.79958E-4		0.2577	0.00184
0.54636	0.42768		0.66005	0.67187		0.23095	9.80056E-4		0.25869	0.00184
0.50599	1.02224		0.68052	0.71677		0.23194	9.80162E-4		0.25968	0.00184
0.51964	0.82227		0.66837	0.27941		0.23293	9.80279E-4		0.26068	0.00184
0.53032	0.23949		0.89878	0.24108		0.23392	9.80406E-4		0.26167	0.00184
0.50411	0.31331		0.65572	0.64046		0.23491	9.80545E-4		0.26266	0.00184
0.61756	0.43497		0.65107	0.3455		0.235	9.80558E-4		0.26365	0.00184
0.47955	0.93722		0.66724	0.28787		0.2359	9.80696E-4		0.26464	0.00184
0.67619	0.28703		0.62913	0.6662		0.23689	9.8086E-4		0.265	0.00184
0.50159	1.56732		0.65372	1.08301		0.23788	9.81039E-4		0.26563	0.00184
0.49675	0.88744		0.60358	0.21365		0.23887	9.81234E-4		0.26662	0.00184
0.50723	2.02284		0.65784	1.09217		0.23986	9.81445E-4		0.26761	0.00184
0.51065	0.34043		0.65882	0.35581		0.24086	9.81676E-4		0.2686	0.00184
0.47989	1.2873		0.82978	0.25008		0.24185	9.81926E-4		0.26959	0.00184
0.55334	0.26581		0.62287	0.9553		0.24284	9.82198E-4		0.27059	0.00184
0.50379	0.73842		0.65522	1.54729		0.24383	9.82493E-4		0.27158	0.00184
0.50418	0.48358		0.66204	0.48785		0.24482	9.82813E-4		0.27257	0.00184
0.54313	0.44711		0.65968	0.57659		0.245	9.82875E-4		0.27356	0.00184
0.51363	0.71984		0.89924	0.2051		0.24581	9.83161E-4		0.27455	0.00184
0.48977	3.08583		0.64412	2.5841		0.2468	9.83538E-4		0.275	0.00184
0.50624	1.41644		0.64779	1.29541		0.24779	9.83947E-4		0.27554	0.00184
0.51888	0.26292		0.6535	1.12326		0.24878	9.84391E-4		0.27653	0.00184
0.5363	0.2511		0.58057	0.37678		0.24977	9.84871E-4		0.27752	0.00184
0.52178	0.70232		0.65924	0.28265		0.25077	9.85391E-4		0.27851	0.00184
0.48616	0.35192		0.64101	0.6206		0.25176	9.85954E-4		0.2795	0.00184
0.51278	0.48349		0.65148	0.55815		0.25275	9.86563E-4		0.2805	0.00184
0.50278	0.3545		0.63439	0.40656		0.25374	9.87222E-4		0.28149	0.00184
0.48991	0.64759		0.64524	0.20876		0.25473	9.87934E-4		0.28248	0.00184
0.51388	1.26805		0.68881	0.21224		0.255	9.88138E-4		0.28347	0.00184
0.53077	0.57031		0.66339	0.46252		0.25572	9.88704E-4		0.28446	0.00184
0.51845	0.2155		0.59914	0.20214		0.25671	9.89536E-4		0.285	0.00184
0.66864	0.26543		0.6506	1.48268		0.2577	9.90434E-4		0.28545	0.00184
0.49553	0.8424		0.64581	1.09743		0.25869	9.91404E-4		0.28644	0.00184
0.49585	1.89794		0.63516	0.44255		0.25968	9.9245E-4		0.28743	0.00184
0.50791	0.31966		0.65137	2.17717		0.26068	9.93579E-4		0.28842	0.00184
0.47689	0.82844		0.64789	1.61813		0.26167	9.94796E-4		0.28941	0.00184
0.48374	0.81832		0.65385	1.53537		0.26266	9.96107E-4		0.29041	0.00184
0.48922	1.00705		0.67291	0.29381		0.26365	9.9752E-4		0.2914	0.00184
0.50628	0.30496		0.42495	0.80663		0.26464	9.99042E-4		0.29239	0.00184
0.49015	0.34237		0.6488	0.85232		0.265	9.99624E-4		0.29338	0.00184
0.5118	0.53042		0.63646	0.40313		0.26563	0.001		0.29437	0.00184
0.5134	1.63346		0.64801	0.80828		0.26662	0.001		0.295	0.00184
0.50642	0.86702		0.58172	0.20145		0.26761	0.001		0.29536	0.00184
0.52951	0.30225		0.64542	0.52725		0.2686	0.00101		0.29635	0.00184
0.51757	0.9217		0.6438	0.28417		0.26959	0.00101		0.29734	0.00184
0.49958	1.95904		0.656	0.66704		0.27059	0.00101		0.29833	0.00184
0.52699	2.26509		0.6305	0.99355		0.27158	0.00101		0.29932	0.00184
0.51302	1.44675		0.64009	0.99715		0.27257	0.00102		0.30032	0.00184
0.51375	0.53147		0.63744	0.23023		0.27356	0.00102		0.30131	0.00184
0.47566	1.25379		0.61366	1.10748		0.27455	0.00102		0.3023	0.00184
0.49392	2.46856		0.67211	0.32666		0.275	0.00102		0.30329	0.00184
0.39112	0.48336		0.63615	0.76321		0.27554	0.00103		0.30428	0.00184
0.51961	0.72754		0.65505	0.40758		0.27653	0.00103		0.305	0.00184
0.52504	0.21625		0.64245	2.0444		0.27752	0.00103		0.30527	0.00184
0.52202	0.56504		0.64903	1.20381		0.27851	0.00104		0.30626	0.00184
0.50501	1.23756		0.63637	0.81843		0.2795	0.00104		0.30725	0.00184
0.51132	0.56865		0.65406	1.30631		0.2805	0.00105		0.30824	0.00184
0.49641	1.2028		0.64095	0.30869		0.28149	0.00105		0.30923	0.00184
0.4672	1.06431		0.67249	0.4693		0.28248	0.00106		0.31023	0.00184
0.49957	0.93896		0.64926	1.47122		0.28347	0.00106		0.31122	0.00184
0.52892	0.239		0.65122	0.83879		0.28446	0.00107		0.31221	0.00184
0.50615	2.53282		0.70651	0.38163		0.285	0.00107		0.3132	0.00184
0.49131	0.21521		0.6458	0.25993		0.28545	0.00108		0.31419	0.00184
0.60243	0.22471		0.65123	0.8338		0.28644	0.00108		0.315	0.00184
0.5022	1.62819		0.65359	0.92071		0.28743	0.00109		0.31518	0.00184
0.50548	1.12982		0.63865	0.47626		0.28842	0.0011		0.31617	0.00184
0.48095	0.73534		0.65612	0.49972		0.28941	0.00111		0.31716	0.00184
0.52336	0.48669		0.66692	0.32267		0.29041	0.00112		0.31815	0.00184
0.53075	0.45872		0.5985	0.31916		0.2914	0.00112		0.31914	0.00184
0.52785	0.48963		0.64189	0.20707		0.29239	0.00114		0.32014	0.00184
0.52766	0.45915		0.63407	0.33938		0.29338	0.00115		0.32113	0.00184
0.51015	0.56777		0.69249	0.42188		0.29437	0.00116		0.32212	0.00184
0.49697	0.28172		0.64819	0.41394		0.295	0.00117		0.32311	0.00184
0.50274	0.68245		0.6425	0.9907		0.29536	0.00117		0.3241	0.00184
0.49968	1.38194		0.65105	0.69733		0.29635	0.00118		0.325	0.00184
0.50201	0.51423		0.66595	0.87423		0.29734	0.0012		0.32509	0.00184
0.50606	1.03047		0.65092	0.96703		0.29833	0.00121		0.32608	0.00184
0.48599	3.10169		0.65663	0.8437		0.29932	0.00123		0.32707	0.00184
0.51769	0.7756		0.62956	0.25364		0.30032	0.00124		0.32806	0.00184
0.47485	1.67576		0.67298	0.20742		0.30131	0.00126		0.32905	0.00184
0.66232	0.4221		0.66407	0.51165		0.3023	0.00128		0.33005	0.00184
0.53147	0.47426		0.64066	0.76908		0.30329	0.0013		0.33104	0.00184
0.48544	0.61173		0.65024	0.46285		0.30428	0.00132		0.33203	0.00184
0.50873	1.94259		0.66688	0.55891		0.305	0.00134		0.33302	0.00184
0.51133	0.49753		0.64346	0.672		0.30527	0.00134		0.33401	0.00184
0.50873	0.7597		0.65325	1.0171		0.30626	0.00137		0.335	0.00184
0.51077	3.59939		0.65452	1.05968		0.30725	0.00139		0.33599	0.00184
0.51119	0.5909		0.64891	0.3676		0.30824	0.00142		0.33698	0.00184
0.52226	0.50336		0.58331	0.43229		0.30923	0.00145		0.33797	0.00184
0.49781	0.67471		0.63986	0.42415		0.31023	0.00148		0.33896	0.00184
0.49091	1.25618		0.82089	0.26608		0.31122	0.00151		0.33995	0.00184
0.5441	0.68998		0.64243	0.34493		0.31221	0.00154		0.34095	0.00184
0.62111	0.20684		0.66006	0.37037		0.3132	0.00158		0.34194	0.00184
0.50081	1.15163		0.70313	0.32202		0.31419	0.00161		0.34293	0.00184
0.50447	1.00194		0.6263	1.06455		0.315	0.00165		0.34392	0.00184
0.49908	0.73092		0.62986	0.23136		0.31518	0.00165		0.34491	0.00184
0.4953	1.00754		0.53529	0.30879		0.31617	0.00169		0.345	0.00184
0.50075	1.55977		0.63809	0.90699		0.31716	0.00174		0.3459	0.00184
0.52133	0.32498		0.60384	0.61235		0.31815	0.00178		0.34689	0.00184
0.51297	1.13966		0.65208	0.81217		0.31914	0.00183		0.34788	0.00184
0.52648	0.38648		0.65505	1.13979		0.32014	0.00188		0.34887	0.00184
0.47187	0.3579		0.64273	2.25811		0.32113	0.00193		0.34986	0.00184
0.49527	0.69186		0.59163	0.70703		0.32212	0.00199		0.35086	0.00184
0.50501	0.32852		0.65761	0.26742		0.32311	0.00205		0.35185	0.00184
0.51563	0.92416		0.57759	0.40707		0.3241	0.00211		0.35284	0.00184
0.482	0.52289		0.57258	0.52489		0.325	0.00217		0.35383	0.00184
0.49959	0.57922		0.67126	0.29273		0.32509	0.00218		0.35482	0.00184
0.51289	0.33885		0.62804	0.20667		0.32608	0.00224		0.355	0.00184
0.52721	0.81523		0.66973	0.46803		0.32707	0.00232		0.35581	0.00184
0.54555	0.30486		0.66942	0.44279		0.32806	0.00239		0.3568	0.00184
0.48998	0.3991		0.66825	0.43055		0.32905	0.00247		0.35779	0.00184
0.51151	0.49307		0.64538	0.99283		0.33005	0.00255		0.35878	0.00184
0.52532	0.41141		0.65618	1.45696		0.33104	0.00264		0.35977	0.00184
0.51933	0.62257		0.68484	0.33866		0.33203	0.00273		0.36077	0.00184
0.52783	0.39081		0.69964	0.20118		0.33302	0.00282		0.36176	0.00184
0.50908	0.29923		0.63232	1.14215		0.33401	0.00292		0.36275	0.00184
0.48255	0.55062		0.6539	0.42569		0.335	0.00302		0.36374	0.00184
0.35345	0.28853		0.64732	0.99214		0.33599	0.00313		0.36473	0.00184
0.49841	1.45732		0.40599	0.32419		0.33698	0.00325		0.365	0.00184
0.48935	0.38264		0.7541	0.27518		0.33797	0.00336		0.36572	0.00184
0.51669	0.32508		0.6179	0.31683		0.33896	0.00349		0.36671	0.00184
0.50188	1.36515		0.66846	0.33921		0.33995	0.00362		0.3677	0.00184
0.54283	0.43022		0.62081	0.29328		0.34095	0.00375		0.36869	0.00184
0.52979	0.46982		0.62503	0.91492		0.34194	0.00389		0.36968	0.00184
0.52582	0.81359		0.64675	2.81322		0.34293	0.00404		0.37068	0.00184
0.63067	0.45784		0.61581	0.21332		0.34392	0.00419		0.37167	0.00184
0.48374	1.39034		0.6506	1.67573		0.34491	0.00435		0.37266	0.00184
0.49348	1.09561		0.64131	0.3364		0.345	0.00436		0.37365	0.00184
0.50705	0.39978		0.60475	0.33924		0.3459	0.00451		0.37464	0.00184
0.51552	1.18244		0.66352	0.54375		0.34689	0.00468		0.375	0.00184
0.50595	0.71583		0.65659	1.35003		0.34788	0.00486		0.37563	0.00184
0.61697	0.31895		0.65432	0.27389		0.34887	0.00505		0.37662	0.00184
0.49176	1.97459		0.68071	0.39118		0.34986	0.00524		0.37761	0.00184
0.48194	0.23568		0.64851	0.93111		0.35086	0.00544		0.3786	0.00184
0.52731	0.29108		0.66249	0.40439		0.35185	0.00565		0.37959	0.00184
0.54687	0.20175		0.65832	0.6029		0.35284	0.00586		0.38059	0.00184
0.49451	0.44059		0.63465	1.01227		0.35383	0.00608		0.38158	0.00184
0.54878	0.22176		0.80418	0.24448		0.35482	0.00632		0.38257	0.00184
0.50728	1.33934		0.64224	0.4193		0.355	0.00636		0.38356	0.00184
0.51723	1.55453		0.64639	0.4197		0.35581	0.00655		0.38455	0.00184
0.56493	0.21618		0.63031	0.26817		0.3568	0.0068		0.385	0.00184
0.49119	1.15489		0.5447	1.57374		0.35779	0.00706		0.38554	0.00184
0.51085	2.91091		0.65964	0.79439		0.35878	0.00733		0.38653	0.00184
0.50895	0.51524		0.41914	0.8896		0.35977	0.0076		0.38752	0.00184
0.50571	1.85894		0.6471	2.1495		0.36077	0.00789		0.38851	0.00184
0.51375	2.03926		0.63101	0.25691		0.36176	0.00818		0.3895	0.00184
0.50708	0.70802		0.67719	0.63926		0.36275	0.00848		0.3905	0.00184
0.48827	0.43403		0.65561	0.2676		0.36374	0.0088		0.39149	0.00184
0.55077	0.28971		0.6115	0.34068		0.36473	0.00912		0.39248	0.00184
0.50553	1.46218		0.26985	0.79077		0.365	0.00921		0.39347	0.00184
0.5143	0.3174		0.6669	0.24121		0.36572	0.00946		0.39446	0.00184
0.55457	0.37535		0.66062	0.23039		0.36671	0.0098		0.395	0.00184
0.45107	0.77116		0.98995	0.20402		0.3677	0.01016		0.39545	0.00184
0.5387	0.35214		0.43941	0.39425		0.36869	0.01052		0.39644	0.00184
0.49218	0.42691		0.63957	1.13484		0.36968	0.0109		0.39743	0.00184
0.50781	0.36005		0.65019	1.08789		0.37068	0.01128		0.39842	0.00184
0.56936	1.13735		0.65329	1.84649		0.37167	0.01168		0.39941	0.00184
0.59617	0.35094		0.29439	0.28308		0.37266	0.01209		0.40041	0.00184
0.55973	0.62717		0.66207	0.48823		0.37365	0.01251		0.4014	0.00184
0.5286	0.41143		0.55084	0.57017		0.37464	0.01295		0.40239	0.00184
0.58703	0.2139		0.65421	0.27096		0.375	0.01311		0.40338	0.00184
0.54821	0.74479		0.65932	0.69031		0.37563	0.01339		0.40437	0.00184
0.6041	0.38364		0.69305	0.46973		0.37662	0.01384		0.405	0.00184
0.63317	0.25759		0.75331	0.33194		0.37761	0.01431		0.40536	0.00184
0.60988	0.23377		0.5113	0.34642		0.3786	0.01479		0.40635	0.00184
0.5654	0.48377		0.65718	0.48659		0.37959	0.01528		0.40734	0.00184
0.55106	0.97107		0.61275	0.35541		0.38059	0.01578		0.40833	0.00184
0.55619	2.37549		0.63815	0.74741		0.38158	0.0163		0.40932	0.00184
0.60806	0.29096		0.61803	0.42151		0.38257	0.01682		0.41032	0.00184
0.57078	0.80684		0.66752	0.3145		0.38356	0.01736		0.41131	0.00184
0.5306	3.23267		0.76359	0.37954		0.38455	0.01791		0.4123	0.00184
0.51817	0.28348		0.67497	0.30714		0.385	0.01817		0.41329	0.00184
0.54312	0.24725		0.65125	0.30064		0.38554	0.01847		0.41428	0.00184
0.58053	0.55885		0.31769	0.40244		0.38653	0.01905		0.415	0.00184
0.6109	0.20116		0.65059	0.26082		0.38752	0.01963		0.41527	0.00184
0.59877	0.25086		0.64434	0.23163		0.38851	0.02023		0.41626	0.00184
0.57794	1.25132		0.64666	2.35945		0.3895	0.02084		0.41725	0.00184
0.61169	0.44709		0.68714	0.20659		0.3905	0.02146		0.41824	0.00184
0.69814	0.20047		0.64785	0.56204		0.39149	0.02209		0.41923	0.00184
0.5651	0.89412		0.58221	1.40101		0.39248	0.02273		0.42023	0.00184
0.59931	0.59598		0.66114	0.61133		0.39347	0.02339		0.42122	0.00184
0.60997	0.34271		0.67935	0.3068		0.39446	0.02405		0.42221	0.00184
0.56321	0.43292		0.64465	0.65946		0.395	0.02442		0.4232	0.00184
0.56315	0.66986		0.63236	1.21301		0.39545	0.02473		0.42419	0.00184
0.62303	0.23328		0.6508	0.20346		0.39644	0.02541		0.425	0.00184
0.56069	0.95219		0.69886	0.23482		0.39743	0.02611		0.42518	0.00184
0.5423	1.38584		0.67205	0.21597		0.39842	0.02682		0.42617	0.00184
0.55489	1.29883		0.6294	0.25043		0.39941	0.02753		0.42716	0.00184
0.74165	0.28024		0.63205	0.52972		0.40041	0.02826		0.42815	0.00184
0.56228	0.77463		0.63712	1.57206		0.4014	0.02899		0.42914	0.00184
0.57346	0.48622		0.95046	0.47032		0.40239	0.02974		0.43014	0.00184
0.55678	0.49666		0.48515	0.40226		0.40338	0.03049		0.43113	0.00184
0.56002	3.732		0.91593	0.83817		0.40437	0.03125		0.43212	0.00184
0.30067	0.88964		0.51376	0.36722		0.405	0.03174		0.43311	0.00184
0.58043	0.21126		0.91855	0.43523		0.40536	0.03202		0.4341	0.00184
0.57684	0.72326		0.93463	1.11797		0.40635	0.0328		0.435	0.00184
0.5604	0.28996		0.90088	0.2259		0.40734	0.03358		0.43509	0.00184
0.56376	0.25944		0.90035	2.4803		0.40833	0.03437		0.43608	0.00184
0.5871	0.78716		0.91087	0.97419		0.40932	0.03517		0.43707	0.00184
0.58507	0.22016		0.89461	0.51162		0.41032	0.03597		0.43806	0.00184
0.56419	0.70678		0.7368	1.68799		0.41131	0.03678		0.43905	0.00184
0.56085	0.27383		0.88803	1.34062		0.4123	0.03759		0.44005	0.00184
0.57198	0.38726		0.95093	0.34424		0.41329	0.03841		0.44104	0.00184
0.58361	1.3225		0.95511	0.23845		0.41428	0.03923		0.44203	0.00184
0.54599	0.21357		0.92084	0.33921		0.415	0.03983		0.44302	0.00184
0.6275	0.23876		0.91895	0.53737		0.41527	0.04005		0.44401	0.00184
0.51282	0.78093		0.91382	0.51386		0.41626	0.04088		0.445	0.00184
0.41131	1.8848		0.94634	0.49942		0.41725	0.04171		0.445	0.00184
0.47712	1.2315		0.93067	0.35948		0.41824	0.04254		0.44599	0.00184
0.4951	0.45605		0.82251	0.2492		0.41923	0.04337		0.44698	0.00184
0.49925	2.48879		0.55086	0.57295		0.42023	0.0442		0.44797	0.00184
0.50993	0.52287		0.63307	0.23387		0.42122	0.04503		0.44896	0.00185
0.45714	0.47878		0.66017	0.29283		0.42221	0.04586		0.44995	0.00185
0.49859	0.30521		0.6384	0.54848		0.4232	0.04669		0.45095	0.00185
0.56296	0.202		0.60669	0.54406		0.42419	0.04752		0.45194	0.00185
0.56012	0.4698		0.62061	0.23019		0.425	0.04819		0.45293	0.00185
0.46826	0.31904		0.60845	0.23281		0.42518	0.04834		0.45392	0.00185
0.49441	0.46187		0.76448	0.37201		0.42617	0.04916		0.45491	0.00185
0.50218	0.67415		0.64114	1.20929		0.42716	0.04998		0.455	0.00185
0.53058	0.42895		0.66257	0.27536		0.42815	0.05079		0.4559	0.00185
0.51311	0.42328		0.64364	0.35085		0.42914	0.05159		0.45689	0.00185
0.42084	0.3704		0.63667	1.60316		0.43014	0.05239		0.45788	0.00185
0.55928	0.62258		0.43419	0.32739		0.43113	0.05318		0.45887	0.00185
0.50931	1.06835		0.6016	0.31939		0.43212	0.05397		0.45986	0.00185
0.5044	2.85831		0.58831	0.50384		0.43311	0.05474		0.46086	0.00185
0.52816	0.62572		0.69273	0.77509		0.4341	0.05551		0.46185	0.00185
0.48719	0.47562		0.63406	0.55907		0.435	0.05619		0.46284	0.00186
0.48104	1.18414		0.58178	2.16818		0.43509	0.05626		0.46383	0.00186
0.53848	0.25475		0.77155	0.20234		0.43608	0.05701		0.46482	0.00186
0.56826	0.28675		0.58887	0.43922		0.43707	0.05774		0.465	0.00186
0.49127	2.5454		0.6536	0.24831		0.43806	0.05846		0.46581	0.00186
0.56223	0.52778		0.64812	0.27085		0.43905	0.05917		0.4668	0.00186
0.49135	1.02638		0.58648	0.35919		0.44005	0.05987		0.46779	0.00186
0.49891	0.45696		0.54502	0.33692		0.44104	0.06055		0.46878	0.00187
0.49364	2.85085		0.82473	0.22936		0.44203	0.06121		0.46977	0.00187
0.5066	1.11043		0.69579	0.22017		0.44302	0.06186		0.47077	0.00187
0.52293	0.50539		0.49469	0.23489		0.44401	0.0625		0.47176	0.00188
0.52682	0.77064		0.57438	0.28701		0.445	0.06312		0.47275	0.00188
0.51154	0.66243		0.6287	1.4469		0.445	0.06312		0.47374	0.00188
0.50244	0.38143		0.73186	0.31476		0.44599	0.06372		0.47473	0.00189
0.50414	0.31104		0.78645	0.24705		0.44698	0.0643		0.475	0.00189
0.51358	0.80392		0.61472	0.26678		0.44797	0.06486		0.47572	0.00189
0.53006	0.30277		0.82043	0.22409		0.44896	0.06541		0.47671	0.0019
0.51922	1.59853		0.64391	1.38282		0.44995	0.06593		0.4777	0.0019
0.52224	1.03155		0.99462	0.24906		0.45095	0.06643		0.47869	0.00191
0.48753	1.60002		0.59587	0.2933		0.45194	0.06692		0.47968	0.00192
0.51015	1.27495		0.94674	0.24075		0.45293	0.06738		0.48068	0.00193
0.51876	0.56329		0.62005	0.5012		0.45392	0.06782		0.48167	0.00193
0.49687	0.25198		0.69059	0.27477		0.45491	0.06823		0.48266	0.00194
0.47244	0.37897		0.62212	2.90502		0.455	0.06827		0.48365	0.00195
0.50538	2.25272		0.66354	0.28189		0.4559	0.06863		0.48464	0.00197
0.49428	0.3183		0.65901	0.98175		0.45689	0.069		0.485	0.00197
0.52267	3.84675		0.64055	0.96215		0.45788	0.06934		0.48563	0.00198
0.49754	1.39971		0.60622	2.71744		0.45887	0.06966		0.48662	0.00199
0.50134	0.63855		0.74137	2.04423		0.45986	0.06996		0.48761	0.00201
0.53148	0.31666		0.67536	0.46457		0.46086	0.07023		0.4886	0.00202
0.50133	0.68692		0.62578	0.94477		0.46185	0.07048		0.48959	0.00204
0.50797	1.71032		0.64734	0.43297		0.46284	0.0707		0.49059	0.00206
0.5389	0.74869		0.45156	0.23163		0.46383	0.0709		0.49158	0.00208
0.51249	2.94705		0.64023	0.43548		0.46482	0.07107		0.49257	0.00211
0.48091	0.23205		0.65958	0.52216		0.465	0.0711		0.49356	0.00213
0.53711	0.50235		0.67453	0.30728		0.46581	0.07122		0.49455	0.00216
0.62629	0.53092		0.62231	1.37138		0.4668	0.07133		0.495	0.00217
0.48375	1.60515		0.52494	0.5959		0.46779	0.07143		0.49554	0.00219
0.37591	0.99257		0.91537	0.21722		0.46878	0.07149		0.49653	0.00222
0.54749	0.41445		0.79818	0.29328		0.46977	0.07153		0.49752	0.00225
0.50891	2.70219		0.94415	0.58856		0.47077	0.07154		0.49851	0.00229
0.50329	1.5741		0.56796	0.30366		0.47176	0.07153		0.4995	0.00233
0.61665	0.22176		0.6362	0.46161		0.47275	0.07149		0.5005	0.00238
0.59082	0.20743		0.68902	0.82973		0.47374	0.07142		0.50149	0.00242
0.51762	0.426		0.72368	0.52687		0.47473	0.07132		0.50248	0.00247
0.51731	0.54285		0.57181	0.21117		0.475	0.07129		0.50347	0.00253
0.52347	0.85243		0.92871	0.27057		0.47572	0.0712		0.50446	0.00259
0.56001	0.26024		0.61359	0.22412		0.47671	0.07106		0.505	0.00262
0.49236	0.81306		0.65203	0.49373		0.4777	0.07088		0.50545	0.00265
0.50949	1.04342		0.60541	0.96822		0.47869	0.07068		0.50644	0.00272
0.49095	2.24011		0.67966	0.73519		0.47968	0.07046		0.50743	0.0028
0.53703	0.59118		0.63996	0.27044		0.48068	0.07021		0.50842	0.00288
0.52948	0.97879		0.70377	1.42134		0.48167	0.06994		0.50941	0.00296
0.49406	0.36215		0.68013	0.27912		0.48266	0.06964		0.51041	0.00305
0.48612	0.43627		0.55484	0.31162		0.48365	0.06931		0.5114	0.00315
0.52677	1.57339		0.60793	1.30036		0.48464	0.06896		0.51239	0.00326
0.56149	0.29281		0.6777	0.27302		0.485	0.06883		0.51338	0.00337
0.46549	0.99795		0.64775	0.52685		0.48563	0.06859		0.51437	0.00349
0.51381	1.22606		0.4999	0.81027		0.48662	0.06819		0.515	0.00357
0.53258	0.26174		0.65426	0.43198		0.48761	0.06778		0.51536	0.00362
0.50469	0.3458		0.6357	0.29452		0.4886	0.06733		0.51635	0.00376
0.50593	0.69672		0.62999	0.58363		0.48959	0.06687		0.51734	0.0039
0.49524	0.27941		0.42318	0.99212		0.49059	0.06639		0.51833	0.00406
0.50904	0.92611		0.64945	0.34738		0.49158	0.06588		0.51932	0.00423
0.50219	0.61847		0.63086	0.55192		0.49257	0.06536		0.52032	0.0044
0.48739	1.0393		0.6317	0.75506		0.49356	0.06481		0.52131	0.00459
0.48883	0.2191		0.61093	0.25365		0.49455	0.06425		0.5223	0.00479
0.50305	1.23031		0.59425	0.28968		0.495	0.06398		0.52329	0.005
0.53506	0.42518		0.49262	0.4338		0.49554	0.06366		0.52428	0.00523
0.51016	0.67801		0.61644	0.33699		0.49653	0.06306		0.525	0.0054
0.52331	0.46675		0.61762	0.57186		0.49752	0.06244		0.52527	0.00547
0.50921	0.6637		0.63535	1.16986		0.49851	0.06181		0.52626	0.00572
0.51194	0.4237		0.62263	1.0686		0.4995	0.06115		0.52725	0.00599
0.49841	2.12008		0.62819	0.40177		0.5005	0.06049		0.52824	0.00627
0.51733	2.40117		0.68491	0.39534		0.50149	0.0598		0.52923	0.00657
0.50664	0.23082		0.63506	0.23052		0.50248	0.05911		0.53023	0.00688
0.50179	0.41804		0.73076	0.26198		0.50347	0.0584		0.53122	0.00721
0.52535	0.21052		0.64209	1.16435		0.50446	0.05767		0.53221	0.00756
0.50373	4.87527		0.6231	0.30815		0.505	0.05728		0.5332	0.00793
0.48767	0.48779		0.63157	0.52299		0.50545	0.05694		0.53419	0.00832
0.49794	0.21936		0.62145	0.69909		0.50644	0.05619		0.535	0.00865
0.4761	0.88402		0.63845	0.61627		0.50743	0.05544		0.53518	0.00872
0.49308	0.35326		0.49963	0.23495		0.50842	0.05467		0.53617	0.00915
0.57612	0.2132		0.61401	0.2311		0.50941	0.0539		0.53716	0.0096
0.50216	0.95541		0.62874	1.11526		0.51041	0.05311		0.53815	0.01006
0.48313	1.12392		0.61737	1.44238		0.5114	0.05232		0.53914	0.01056
0.52234	0.90048		0.6398	2.41748		0.51239	0.05152		0.54014	0.01107
0.4965	0.975		0.64617	0.25467		0.51338	0.05071		0.54113	0.01161
0.51189	0.83261		0.76018	0.23174		0.51437	0.0499		0.54212	0.01217
0.48994	0.76565		0.636	0.94475		0.515	0.04939		0.54311	0.01275
0.50828	0.70421		0.66922	0.26741		0.51536	0.04909		0.5441	0.01336
0.5528	0.23271		0.59464	1.83022		0.51635	0.04827		0.545	0.01394
0.51017	1.67703		0.62497	0.78402		0.51734	0.04744		0.54509	0.014
0.50728	1.37625		0.64018	0.53128		0.51833	0.04662		0.54608	0.01466
0.53633	0.63091		0.6588	0.58979		0.51932	0.04579		0.54707	0.01535
0.48988	0.33843		0.61753	0.73411		0.52032	0.04496		0.54806	0.01606
0.56318	0.63337		0.64456	0.35139		0.52131	0.04413		0.54905	0.0168
0.46982	0.63809		0.63535	0.29701		0.5223	0.0433		0.55005	0.01757
0.65631	0.21235		0.61396	0.33476		0.52329	0.04246		0.55104	0.01837
0.48067	0.78394		0.65684	0.44468		0.52428	0.04163		0.55203	0.01919
0.49935	0.69066		0.8097	0.21054		0.525	0.04103		0.55302	0.02004
0.49842	0.34482		0.64302	0.50646		0.52527	0.04081		0.55401	0.02092
0.49522	0.58799		0.64762	1.54731		0.52626	0.03998		0.555	0.02183
0.50227	1.22786		0.63466	0.44399		0.52725	0.03916		0.55599	0.02277
0.48463	0.25456		0.62039	0.31952		0.52824	0.03833		0.55698	0.02373
0.5081	0.8704		0.63849	1.32114		0.52923	0.03752		0.55797	0.02472
0.51124	0.95169		0.63953	0.30202		0.53023	0.03671		0.55896	0.02574
0.50801	1.63801		0.58577	0.49843		0.53122	0.0359		0.55995	0.02679
0.50191	1.09378		0.60318	1.55675		0.53221	0.0351		0.56095	0.02787
0.50357	0.23178		0.64484	0.40416		0.5332	0.0343		0.56194	0.02897
0.50241	3.74147		0.60519	0.31904		0.53419	0.03351		0.56293	0.0301
0.91289	0.27095		0.27511	2.18963		0.535	0.03287		0.56392	0.03125
0.50347	2.40627		0.65927	0.46762		0.53518	0.03273		0.56491	0.03243
0.51594	2.33953		0.65621	0.40221		0.53617	0.03195		0.565	0.03254
0.53199	0.50647		0.10467	0.37284		0.53716	0.03118		0.5659	0.03363
0.52729	0.48716		0.62833	0.49785		0.53815	0.03042		0.56689	0.03486
0.5027	2.88519		0.6254	0.70429		0.53914	0.02967		0.56788	0.03611
0.47393	1.78792		0.64484	1.26555		0.54014	0.02893		0.56887	0.03738
0.49963	0.3866		0.64072	1.19894		0.54113	0.02819		0.56986	0.03868
0.50572	0.8526		0.64397	1.52682		0.54212	0.02747		0.57086	0.03999
0.48732	1.4157		0.61444	0.69057		0.54311	0.02675		0.57185	0.04132
0.51197	0.88021		0.69405	0.25853		0.5441	0.02605		0.57284	0.04267
0.50562	0.21206		0.90599	0.22661		0.545	0.02541		0.57383	0.04403
0.51716	0.74092		0.82188	0.20066		0.54509	0.02535		0.57482	0.04541
0.48782	0.56425		0.99293	0.23549		0.54608	0.02466		0.575	0.04566
0.49694	0.31811		0.88316	0.21865		0.54707	0.02399		0.57581	0.0468
0.52077	0.96372		0.53054	5.12415		0.54806	0.02333		0.5768	0.0482
0.49238	0.21445		0.8542	0.29076		0.54905	0.02267		0.57779	0.04961
0.43613	0.424		0.92126	0.22527		0.55005	0.02203		0.57878	0.05103
0.50353	2.05513		0.54364	1.0117		0.55104	0.0214		0.57977	0.05246
0.511	0.39054		0.58962	1.26644		0.55203	0.02078		0.58077	0.05388
0.51655	1.42866		0.56149	0.69597		0.55302	0.02017		0.58176	0.05531
0.51178	0.2828		0.54828	0.81311		0.55401	0.01958		0.58275	0.05674
0.47757	3.28276		0.56335	0.28784		0.555	0.01899		0.58374	0.05817
0.56112	0.33547		0.58025	0.59913		0.55599	0.01842		0.58473	0.0596
0.49352	1.28978		0.63722	0.20037		0.55698	0.01786		0.585	0.05998
0.4933	1.21942		0.53305	0.84317		0.55797	0.01731		0.58572	0.06101
0.52037	0.28117		0.55207	1.9151		0.55896	0.01677		0.58671	0.06242
0.51398	0.50118		0.56057	0.40242		0.55995	0.01625		0.5877	0.06382
0.49963	2.61426		0.58385	0.46807		0.56095	0.01574		0.58869	0.0652
0.49335	0.49881		0.51974	1.3055		0.56194	0.01523		0.58968	0.06657
0.53916	0.24875		0.47457	0.22601		0.56293	0.01475		0.59068	0.06792
0.53031	1.56782		0.582	1.61294		0.56392	0.01427		0.59167	0.06925
0.49619	1.4684		0.57007	2.95945		0.56491	0.0138		0.59266	0.07056
0.51111	1.24534		0.54256	0.27398		0.565	0.01376		0.59365	0.07184
0.46473	0.75243		0.65763	1.11909		0.5659	0.01335		0.59464	0.0731
0.47943	0.87508		0.62468	0.59303		0.56689	0.0129		0.595	0.07355
0.50645	0.22289		0.66901	0.48		0.56788	0.01247		0.59563	0.07432
0.48551	0.37068		0.63221	0.23139		0.56887	0.01205		0.59662	0.07552
0.47641	3.38486		0.64815	2.01227		0.56986	0.01165		0.59761	0.07668
0.51824	1.13922		0.64008	1.21415		0.57086	0.01125		0.5986	0.0778
0.53007	0.39168		0.67984	0.28662		0.57185	0.01086		0.59959	0.07888
0.52365	0.23474		0.66988	0.61969		0.57284	0.01049		0.60059	0.07993
0.47215	1.62232		0.5801	0.30545		0.57383	0.01012		0.60158	0.08093
0.53082	1.76398		0.58376	0.20218		0.57482	0.00977		0.60257	0.08189
0.51239	1.54686		0.65264	1.06895		0.575	0.0097		0.60356	0.0828
0.50197	1.62601		0.61986	0.85773		0.57581	0.00942		0.60455	0.08366
0.5167	0.60665		0.6676	0.85066		0.5768	0.00909		0.605	0.08404
0.51482	0.62116		0.56165	0.24945		0.57779	0.00877		0.60554	0.08447
0.53043	0.25963		0.6595	0.26886		0.57878	0.00846		0.60653	0.08523
0.50721	1.38682		0.60489	0.4004		0.57977	0.00815		0.60752	0.08594
0.4823	2.26692		0.62413	1.42411		0.58077	0.00786		0.60851	0.08659
0.47387	0.38255		0.61745	0.24739		0.58176	0.00758		0.6095	0.08719
0.51236	1.02287		0.6221	1.02687		0.58275	0.0073		0.6105	0.08772
0.49669	0.49556		0.62716	2.30601		0.58374	0.00704		0.61149	0.0882
0.48549	0.30282		0.65239	0.37273		0.58473	0.00678		0.61248	0.08862
0.51247	1.38695		0.64428	0.80856		0.585	0.00671		0.61347	0.08898
0.52148	1.16151		0.65226	0.34577		0.58572	0.00653		0.61446	0.08928
0.47986	1.59944		0.66054	1.29881		0.58671	0.00629		0.615	0.08942
0.4921	1.04712		0.63632	0.77675		0.5877	0.00606		0.61545	0.08952
0.50482	1.57229		0.62309	1.14832		0.58869	0.00584		0.61644	0.08969
0.5742	0.23894		0.61867	0.40229		0.58968	0.00563		0.61743	0.0898
0.52035	0.25757		0.61944	0.24072		0.59068	0.00542		0.61842	0.08985
0.50946	2.37742		0.62542	0.35583		0.59167	0.00522		0.61941	0.08983
0.48391	0.74643		0.6571	1.17584		0.59266	0.00503		0.62041	0.08975
0.52511	0.4668		0.65691	1.61304		0.59365	0.00484		0.6214	0.08961
0.5084	1.11593		0.67035	0.99508		0.59464	0.00467		0.62239	0.0894
0.53684	0.2981		0.65065	1.18874		0.595	0.0046		0.62338	0.08914
0.51528	0.29153		0.68324	0.20341		0.59563	0.0045		0.62437	0.08881
0.53592	0.29013		0.64929	0.5		0.59662	0.00433		0.625	0.08857
0.53563	1.01503		0.63422	1.65155		0.59761	0.00417		0.62536	0.08842
0.44979	0.22821		0.6453	0.36004		0.5986	0.00402		0.62635	0.08797
0.47344	0.41717		0.6576	0.2385		0.59959	0.00388		0.62734	0.08746
0.49256	0.92486		0.64231	0.34528		0.60059	0.00374		0.62833	0.08689
0.55759	0.25906		0.5189	1.67123		0.60158	0.0036		0.62932	0.08627
0.69163	3.57791		0.48557	0.53924		0.60257	0.00348		0.63032	0.08559
0.52477	0.25384		0.59487	4.18667		0.60356	0.00335		0.63131	0.08486
0.50104	1.00988		0.96787	0.25461		0.60455	0.00324		0.6323	0.08407
0.5229	0.55622		0.47887	0.2957		0.605	0.00318		0.63329	0.08323
0.5071	0.32242		0.5972	1.37062		0.60554	0.00312		0.63428	0.08235
0.49876	0.77862		0.77915	0.26567		0.60653	0.00302		0.635	0.08167
0.48236	0.33664		0.5971	0.86649		0.60752	0.00291		0.63527	0.08141
0.48007	2.37805		0.61829	2.67306		0.60851	0.00281		0.63626	0.08043
0.4798	0.51329		0.65367	0.85148		0.6095	0.00272		0.63725	0.07941
0.51491	0.58017		0.61398	3.63535		0.6105	0.00263		0.63824	0.07834
0.47765	0.77764		0.66265	0.65207		0.61149	0.00254		0.63923	0.07724
0.52742	0.47912		0.66775	0.31572		0.61248	0.00246		0.64023	0.0761
0.52058	1.30641		0.60625	0.83532		0.61347	0.00238		0.64122	0.07492
0.52062	0.77993		0.63073	1.56322		0.61446	0.00231		0.64221	0.07371
0.48302	0.4741		0.6221	0.32311		0.615	0.00227		0.6432	0.07247
0.50568	1.73461		0.62996	2.27144		0.61545	0.00224		0.64419	0.0712
0.45273	0.36146		0.63111	1.60245		0.61644	0.00217		0.645	0.07014
0.52038	2.92953		0.59048	0.30289		0.61743	0.00211		0.64518	0.0699
0.51125	0.80184		0.6062	0.84544		0.61842	0.00204		0.64617	0.06858
0.51524	0.99872		0.65112	0.83912		0.61941	0.00199		0.64716	0.06724
0.50077	0.36639		0.64238	0.80061		0.62041	0.00193		0.64815	0.06588
0.53405	0.28267		0.62472	0.26026		0.6214	0.00188		0.64914	0.06451
0.5982	0.24174		0.64117	0.95827		0.62239	0.00183		0.65014	0.06312
0.51539	1.87811		0.6594	2.0468		0.62338	0.00178		0.65113	0.06171
0.4991	0.72539		0.66076	0.20406		0.62437	0.00173		0.65212	0.0603
0.48202	2.37673		0.61783	1.93994		0.625	0.00171		0.65311	0.05888
0.49985	0.34033		0.24964	0.69453		0.62536	0.00169		0.6541	0.05745
0.51136	1.33536		0.98637	0.21639		0.62635	0.00165		0.655	0.05616
0.49325	0.57253		0.61912	0.80727		0.62734	0.00161		0.65509	0.05603
0.53177	0.49767		0.66428	0.4261		0.62833	0.00157		0.65608	0.05459
0.49302	0.73764		0.67471	0.24057		0.62932	0.00154		0.65707	0.05317
0.42308	0.91582		0.64223	0.75583		0.63032	0.00151		0.65806	0.05174
0.53965	0.29032		0.65506	0.24706		0.63131	0.00148		0.65905	0.05032
0.38811	0.87016		0.63334	1.80598		0.6323	0.00145		0.66005	0.0489
0.52577	0.45051		0.65746	0.47678		0.63329	0.00142		0.66104	0.0475
0.44352	0.23557		0.59241	0.91959		0.63428	0.00139		0.66203	0.0461
0.51916	1.76825		0.60785	1.00841		0.635	0.00137		0.66302	0.04471
0.43362	0.20556		0.57353	0.22559		0.63527	0.00137		0.66401	0.04334
0.57649	0.22215		0.628	1.43899		0.63626	0.00134		0.665	0.04199
0.48177	0.37544		0.64943	0.86808		0.63725	0.00132		0.66599	0.04065
0.5352	0.21485		0.66403	0.23599		0.63824	0.0013		0.66698	0.03933
0.50661	0.69671		0.68617	0.28788		0.63923	0.00128		0.66797	0.03802
0.48652	1.78986		0.63095	0.24354		0.64023	0.00126		0.66896	0.03674
0.49016	0.71966		0.60036	0.54783		0.64122	0.00124		0.66995	0.03548
0.51011	0.36762		0.20592	0.52207		0.64221	0.00123		0.67095	0.03424
0.54241	0.62329		0.54518	0.21966		0.6432	0.00121		0.67194	0.03303
0.503	0.88601		0.62266	0.55483		0.64419	0.0012		0.67293	0.03183
0.51248	0.32321		0.67211	0.35341		0.645	0.00118		0.67392	0.03067
0.54259	0.31854		0.63846	0.20663		0.64518	0.00118		0.67491	0.02953
0.44156	2.84673		0.64136	0.32143		0.64617	0.00117		0.675	0.02942
0.50343	0.7276		0.48561	2.87177		0.64716	0.00116		0.6759	0.02841
0.48802	0.26333		0.62293	0.56581		0.64815	0.00115		0.67689	0.02732
0.52402	1.10784		0.64944	0.31434		0.64914	0.00113		0.67788	0.02626
0.52001	0.48565		0.66329	0.48283		0.65014	0.00112		0.67887	0.02523
0.51341	2.48188		0.6196	0.95539		0.65113	0.00111		0.67986	0.02422
0.55372	0.52297		0.66618	0.51815		0.65212	0.00111		0.68086	0.02324
0.54662	0.20597		0.63047	0.37942		0.65311	0.0011		0.68185	0.02229
0.51351	1.17064		0.59849	0.22773		0.6541	0.00109		0.68284	0.02137
0.51244	1.65873		0.66662	0.60866		0.655	0.00108		0.68383	0.02047
0.46877	0.67168		0.64215	1.79706		0.65509	0.00108		0.68482	0.01961
0.49361	0.68296		0.64838	0.60353		0.65608	0.00107		0.685	0.01945
0.53452	0.35658		0.65178	0.7114		0.65707	0.00107		0.68581	0.01877
0.49678	0.89624		0.59164	0.44818		0.65806	0.00106		0.6868	0.01796
0.55595	0.61327		0.64485	0.24251		0.65905	0.00106		0.68779	0.01718
0.52833	0.52384		0.64461	0.84016		0.66005	0.00105		0.68878	0.01642
0.50449	2.4725		0.61217	0.54508		0.66104	0.00105		0.68977	0.0157
0.50143	1.89069		0.63868	0.69987		0.66203	0.00104		0.69077	0.015
0.52037	0.54732		0.62468	1.35138		0.66302	0.00104		0.69176	0.01432
0.51904	0.59547		0.66779	0.39122		0.66401	0.00103		0.69275	0.01367
0.50415	0.24763		0.64093	0.96465		0.665	0.00103		0.69374	0.01305
0.49981	0.2415		0.59276	0.91134		0.66599	0.00103		0.69473	0.01245
0.51016	0.36459		0.58894	0.82452		0.66698	0.00102		0.695	0.0123
0.50784	0.59466		0.64436	0.96236		0.66797	0.00102		0.69572	0.01188
0.50358	0.25811		0.63383	1.94788		0.66896	0.00102		0.69671	0.01133
0.51209	0.25162		0.63139	1.00592		0.66995	0.00101		0.6977	0.01081
0.51618	0.31622		0.64291	1.62897		0.67095	0.00101		0.69869	0.01031
0.49657	0.42244		0.64943	0.84336		0.67194	0.00101		0.69968	0.00983
0.554	0.26195		0.6377	0.5732		0.67293	0.00101		0.70068	0.00937
0.5145	1.86368		0.65864	1.04365		0.67392	0.001		0.70167	0.00893
0.51489	0.81665		0.5855	0.55481		0.67491	0.001		0.70266	0.00852
0.4911	4.30361		0.64706	0.76591		0.675	0.001		0.70365	0.00812
0.52256	1.17486		0.64333	1.14905		0.6759	0.001		0.70464	0.00774
0.50754	0.99346		0.66959	0.20674		0.67689	9.98897E-4		0.705	0.00761
0.49758	1.39852		0.64937	0.88879		0.67788	9.97386E-4		0.70563	0.00738
0.494	0.7376		0.66219	0.62626		0.67887	9.95982E-4		0.70662	0.00704
0.46769	0.90448		0.98254	0.21826		0.67986	9.9468E-4		0.70761	0.00672
0.49222	0.70343		0.65552	1.23749		0.68086	9.93471E-4		0.7086	0.00641
0.5288	1.24952		0.5904	0.28829		0.68185	9.9235E-4		0.70959	0.00612
0.50033	2.90271		0.7451	0.38173		0.68284	9.91311E-4		0.71059	0.00585
0.55906	0.20397		0.63998	0.38385		0.68383	9.90348E-4		0.71158	0.00559
0.50888	0.95601		0.08961	0.21369		0.68482	9.89456E-4		0.71257	0.00534
0.53855	0.21288		0.9788	0.25562		0.685	9.89302E-4		0.71356	0.00511
0.60079	0.29987		0.99572	0.21655		0.68581	9.88631E-4		0.71455	0.00489
0.5241	1.17105		0.84461	0.26829		0.6868	9.87866E-4		0.715	0.0048
0.37062	0.58653		0.98523	0.23774		0.68779	9.87159E-4		0.71554	0.00469
0.51587	1.32566		0.65299	0.21094		0.68878	9.86505E-4		0.71653	0.0045
0.49676	0.23467		0.63241	0.35327		0.68977	9.859E-4		0.71752	0.00431
0.50326	0.24914		0.63331	0.40952		0.69077	9.85341E-4		0.71851	0.00414
0.53895	0.73123		0.66218	0.42685		0.69176	9.84825E-4		0.7195	0.00398
0.52364	0.45379		0.62901	0.8796		0.69275	9.84348E-4		0.7205	0.00383
0.47311	1.20819		0.77136	0.34827		0.69374	9.83908E-4		0.72149	0.00369
0.52557	0.39491		0.65467	0.91286		0.69473	9.83502E-4		0.72248	0.00355
0.48008	0.35751		0.64467	0.48219		0.695	9.83397E-4		0.72347	0.00343
0.51229	0.24889		0.63207	0.4453		0.69572	9.83128E-4		0.72446	0.00331
0.51311	3.17672		0.11944	0.70301		0.69671	9.82783E-4		0.725	0.00325
0.54522	0.31959		0.76077	0.27195		0.6977	9.82465E-4		0.72545	0.0032
0.48238	0.59354		0.59128	0.31433		0.69869	9.82172E-4		0.72644	0.0031
0.52921	0.62266		0.4402	0.6033		0.69968	9.81902E-4		0.72743	0.00301
0.49279	0.55535		0.66437	0.38803		0.70068	9.81654E-4		0.72842	0.00292
0.51673	0.33598		0.64627	0.43924		0.70167	9.81425E-4		0.72941	0.00284
0.5002	1.69734		0.60899	0.78855		0.70266	9.81215E-4		0.73041	0.00276
0.49816	1.04387		0.59877	0.62173		0.70365	9.81022E-4		0.7314	0.00269
0.5212	0.81811		0.62534	0.32172		0.70464	9.80844E-4		0.73239	0.00262
0.51707	1.26678		0.73741	0.21046		0.705	9.80783E-4		0.73338	0.00256
0.52432	0.66312		0.58816	3.7748		0.70563	9.80681E-4		0.73437	0.0025
0.50742	1.01051		0.63133	0.64289		0.70662	9.80532E-4		0.735	0.00247
0.4699	2.18491		0.40024	0.25245		0.70761	9.80394E-4		0.73536	0.00245
0.5038	0.54668		0.62775	0.92403		0.7086	9.80268E-4		0.73635	0.0024
0.51296	0.30677		0.61326	0.5437		0.70959	9.80152E-4		0.73734	0.00235
0.40348	0.2824		0.64452	0.64289		0.71059	9.80046E-4		0.73833	0.00231
0.46909	2.13106		0.66039	0.27665		0.71158	9.79949E-4		0.73932	0.00227
0.51907	0.5228		0.65935	1.05181		0.71257	9.7986E-4		0.74032	0.00224
0.48264	1.04644		0.64708	2.59195		0.71356	9.79778E-4		0.74131	0.0022
0.48234	0.43669		0.64157	0.92698		0.71455	9.79704E-4		0.7423	0.00217
0.50602	0.21027		0.63292	0.78731		0.715	9.79672E-4		0.74329	0.00214
0.51342	1.84245		0.64044	0.45523		0.71554	9.79635E-4		0.74428	0.00212
0.53867	0.49235		0.87451	0.21472		0.71653	9.79573E-4		0.745	0.0021
0.48186	0.6031		0.63932	0.3307		0.71752	9.79516E-4		0.74527	0.00209
0.52498	0.70748		0.61054	0.99521		0.71851	9.79464E-4		0.74626	0.00207
0.4857	0.74707		0.64888	0.6809		0.7195	9.79416E-4		0.74725	0.00205
0.51516	0.22699		0.6367	0.97171		0.7205	9.79372E-4		0.74824	0.00203
0.50635	1.53709		0.61588	0.39582		0.72149	9.79333E-4		0.74923	0.00202
0.52288	0.31355		0.60545	0.9365		0.72248	9.79296E-4		0.75023	0.002
0.50273	0.26971		0.62471	0.2429		0.72347	9.79263E-4		0.75122	0.00199
0.50791	0.82701		0.60739	1.11299		0.72446	9.79233E-4		0.75221	0.00197
0.45553	0.78374		0.65883	0.71044		0.725	9.79218E-4		0.7532	0.00196
0.48784	1.13944		0.72685	0.27944		0.72545	9.79206E-4		0.75419	0.00195
0.47299	0.66288		0.55648	1.25612		0.72644	9.79181E-4		0.755	0.00194
0.48532	0.50336		0.64712	1.0016		0.72743	9.79158E-4		0.75518	0.00194
0.57892	1.26457		0.57791	1.20243		0.72842	9.79137E-4		0.75617	0.00193
0.51609	1.15397		0.59454	0.49076		0.72941	9.79118E-4		0.75716	0.00192
0.5453	0.23851		0.63544	0.52481		0.73041	9.79101E-4		0.75815	0.00191
0.53681	0.44997		0.60588	2.53606		0.7314	9.79085E-4		0.75914	0.00191
0.50886	0.41953		0.59718	1.41537		0.73239	9.79071E-4		0.76014	0.0019
0.52202	0.38802		0.62827	0.30373		0.73338	9.79058E-4		0.76113	0.0019
0.52478	0.61331		0.64384	0.21495		0.73437	9.79047E-4		0.76212	0.00189
0.51774	3.06417		0.54942	1.26557		0.735	9.7904E-4		0.76311	0.00189
0.54152	0.53108		0.71029	0.27966		0.73536	9.79036E-4		0.7641	0.00188
0.50837	0.43503		0.64104	1.66692		0.73635	9.79026E-4		0.765	0.00188
0.50946	1.68668		0.64583	1.77204		0.73734	9.79017E-4		0.76509	0.00188
0.49029	0.84617		0.68184	0.36535		0.73833	9.7901E-4		0.76608	0.00187
0.50165	2.1908		0.63469	0.47436		0.73932	9.79002E-4		0.76707	0.00187
0.50706	0.50464		0.62907	0.45728		0.74032	9.78996E-4		0.76806	0.00187
0.52562	2.21236		0.62982	0.34822		0.74131	9.7899E-4		0.76905	0.00187
0.49427	0.66635		0.63536	0.8379		0.7423	9.78985E-4		0.77005	0.00186
0.49668	0.86291		0.62483	0.34662		0.74329	9.7898E-4		0.77104	0.00186
0.50142	4.67986		0.62142	1.23176		0.74428	9.78975E-4		0.77203	0.00186
0.52041	0.23416		0.60507	2.01214		0.745	9.78972E-4		0.77302	0.00186
0.47954	2.25534		0.83536	0.24642		0.74527	9.78971E-4		0.77401	0.00186
0.50331	3.13488		0.64211	0.7833		0.74626	9.78968E-4		0.775	0.00185
0.5424	0.85083		0.59741	0.3579		0.74725	9.78965E-4		0.77599	0.00185
0.51569	0.27506		0.59359	0.42		0.74824	9.78962E-4		0.77698	0.00185
0.52244	0.49831		0.63081	1.35873		0.74923	9.78959E-4		0.77797	0.00185
0.52142	1.14587		0.65882	0.53383		0.75023	9.78957E-4		0.77896	0.00185
0.48247	0.63181		0.63164	0.24079		0.75122	9.78954E-4		0.77995	0.00185
0.51395	0.49952		0.59307	0.7438		0.75221	9.78953E-4		0.78095	0.00185
0.50135	1.51276		0.61454	0.67483		0.7532	9.78951E-4		0.78194	0.00185
0.52648	0.50121		0.68995	0.23506		0.75419	9.78949E-4		0.78293	0.00185
0.51552	0.49908		0.66222	0.35224		0.755	9.78948E-4		0.78392	0.00185
0.45426	0.34971		0.63143	0.25487		0.75518	9.78948E-4		0.78491	0.00185
0.49944	2.24104		0.64031	3.17486		0.75617	9.78946E-4		0.785	0.00185
0.50554	0.42787		0.66975	0.63163		0.75716	9.78945E-4		0.7859	0.00185
0.49042	1.60666		0.63789	0.57901		0.75815	9.78944E-4		0.78689	0.00185
0.47477	0.83106		0.61108	1.34744		0.75914	9.78943E-4		0.78788	0.00185
0.64806	0.33891		0.5918	0.56722		0.76014	9.78943E-4		0.78887	0.00185
0.52187	0.44647		0.6287	0.30321		0.76113	9.78942E-4		0.78986	0.00184
0.4779	0.62697		0.65152	0.60657		0.76212	9.78941E-4		0.79086	0.00184
0.52019	0.38115		0.66889	0.54241		0.76311	9.78941E-4		0.79185	0.00184
0.52771	0.33522		0.61922	1.31573		0.7641	9.7894E-4		0.79284	0.00184
0.51139	0.57694		0.67831	0.26579		0.765	9.7894E-4		0.79383	0.00184
0.51181	0.8351		0.97075	0.20219		0.76509	9.78939E-4		0.79482	0.00184
0.49617	1.90059		0.89405	0.28217		0.76608	9.78939E-4		0.795	0.00184
0.51101	2.07298		0.60912	0.68236		0.76707	9.78939E-4		0.79581	0.00184
0.49983	0.8509		0.58188	0.36721		0.76806	9.78938E-4		0.7968	0.00184
0.49576	3.88402		0.61855	0.50612		0.76905	9.78938E-4		0.79779	0.00184
0.51646	1.81728		0.64446	0.30559		0.77005	9.78938E-4		0.79878	0.00184
0.50341	0.74631		0.63748	0.90774		0.77104	9.78937E-4		0.79977	0.00184
0.49351	1.03385		0.62305	0.41391		0.77203	9.78937E-4		0.80077	0.00184
0.5104	1.86367		0.60463	0.28643		0.77302	9.78937E-4		0.80176	0.00184
0.4813	0.36675		0.5879	1.27059		0.77401	9.78937E-4		0.80275	0.00184
0.49792	1.30062		0.66919	0.24789		0.775	9.78937E-4		0.80374	0.00184
0.5273	0.79145		0.6178	0.69123		0.77599	9.78937E-4		0.80473	0.00184
0.49997	1.75841		0.602	10.6256		0.77698	9.78936E-4		0.805	0.00184
0.50139	0.52556		0.69082	0.27897		0.77797	9.78936E-4		0.80572	0.00184
0.5076	0.4107		0.6409	0.77228		0.77896	9.78936E-4		0.80671	0.00184
0.49041	0.79638		0.63171	0.4142		0.77995	9.78936E-4		0.8077	0.00184
0.50903	2.59613		0.58795	1.97281		0.78095	9.78936E-4		0.80869	0.00184
0.52173	0.55859		0.67252	0.43933		0.78194	9.78936E-4		0.80968	0.00184
0.47492	1.45438		0.6283	0.94312		0.78293	9.78936E-4		0.81068	0.00184
0.67821	0.45724		0.64099	0.59983		0.78392	9.78936E-4		0.81167	0.00184
0.52718	0.223		0.67603	0.44734		0.78491	9.78936E-4		0.81266	0.00184
0.50283	0.43713		0.63822	0.28764		0.785	9.78936E-4		0.81365	0.00184
0.55893	0.20897		0.63529	0.36363		0.7859	9.78936E-4		0.81464	0.00184
0.47686	1.03804		0.60819	0.71623		0.78689	9.78936E-4		0.815	0.00184
0.50457	0.84092		0.66797	0.25838		0.78788	9.78936E-4		0.81563	0.00184
0.53797	0.79604		0.70167	0.20683		0.78887	9.78936E-4		0.81662	0.00184
0.51581	0.20738		0.65119	0.2015		0.78986	9.78936E-4		0.81761	0.00184
0.46264	0.48084		0.69508	0.21212		0.79086	9.78936E-4		0.8186	0.00184
0.49064	0.37534		0.62048	0.94051		0.79185	9.78936E-4		0.81959	0.00184
0.4915	3.10603		0.63491	0.34868		0.79284	9.78936E-4		0.82059	0.00184
0.5205	0.28747		0.62409	1.95365		0.79383	9.78935E-4		0.82158	0.00184
0.54997	0.5558		0.66267	0.638		0.79482	9.78935E-4		0.82257	0.00184
0.49851	1.19601		0.59869	0.29454		0.795	9.78935E-4		0.82356	0.00184
0.45137	0.30538		0.24796	0.29583		0.79581	9.78935E-4		0.82455	0.00184
0.49575	1.19534		0.63174	1.98976		0.7968	9.78935E-4		0.825	0.00184
0.52809	0.31545		0.61837	0.88417		0.79779	9.78935E-4		0.82554	0.00184
0.48197	0.73982		0.63261	0.57371		0.79878	9.78935E-4		0.82653	0.00184
0.50328	1.62815		0.65654	0.93307		0.79977	9.78935E-4		0.82752	0.00184
0.50231	0.63856		0.64913	4.8454		0.80077	9.78935E-4		0.82851	0.00184
0.53078	0.3743		0.67906	0.21595		0.80176	9.78935E-4		0.8295	0.00184
0.50125	0.65027		0.65356	0.22419		0.80275	9.78935E-4		0.8305	0.00184
0.5214	0.56307		0.65376	0.55496		0.80374	9.78935E-4		0.83149	0.00184
0.52599	1.2255		0.63075	0.96895		0.80473	9.78935E-4		0.83248	0.00184
0.52268	0.34596		0.39082	0.21909		0.805	9.78935E-4		0.83347	0.00184
0.51475	0.34279		0.671	0.42751		0.80572	9.78935E-4		0.83446	0.00184
0.50792	1.894		0.66603	0.30999		0.80671	9.78935E-4		0.835	0.00184
0.52687	1.56524		0.65226	0.67037		0.8077	9.78935E-4		0.83545	0.00184
0.5338	0.40263		0.74266	0.28009		0.80869	9.78935E-4		0.83644	0.00184
0.51348	1.21118		0.65941	0.47826		0.80968	9.78935E-4		0.83743	0.00184
0.51074	1.77385		0.57477	1.02839		0.81068	9.78935E-4		0.83842	0.00184
0.50629	0.25579		0.66776	0.60361		0.81167	9.78935E-4		0.83941	0.00184
0.50384	1.10946		0.61347	0.31398		0.81266	9.78935E-4		0.84041	0.00184
0.49183	1.17993		0.59284	1.00425		0.81365	9.78935E-4		0.8414	0.00184
0.50928	0.42579		0.65732	0.50449		0.81464	9.78935E-4		0.84239	0.00184
0.51593	0.33444		0.66005	0.55172		0.815	9.78935E-4		0.84338	0.00184
0.51309	0.32838		0.65341	0.26289		0.81563	9.78935E-4		0.84437	0.00184
0.52209	0.30964		0.4585	0.83368		0.81662	9.78935E-4		0.845	0.00184
0.50527	0.95438		0.66318	0.73825		0.81761	9.78935E-4		0.84536	0.00184
0.48927	0.22573		0.62353	0.54885		0.8186	9.78935E-4		0.84635	0.00184
0.5225	1.66815		0.64078	0.83155		0.81959	9.78935E-4		0.84734	0.00184
0.52048	0.69019		0.65123	0.50253		0.82059	9.78935E-4		0.84833	0.00184
0.5213	0.69037		0.60148	0.46416		0.82158	9.78935E-4		0.84932	0.00184
0.49906	1.97867		0.63028	0.60783		0.82257	9.78935E-4		0.85032	0.00184
0.50765	0.3423		0.66567	0.33304		0.82356	9.78935E-4		0.85131	0.00184
0.50783	2.34464		0.593	0.23941		0.82455	9.78935E-4		0.8523	0.00184
0.53222	0.40202		0.64475	1.44497		0.825	9.78935E-4		0.85329	0.00184
0.69294	0.21585		0.70286	0.25832		0.82554	9.78935E-4		0.85428	0.00184
0.51273	0.41963		0.61635	3.71499		0.82653	9.78935E-4		0.855	0.00184
0.51355	2.46833		0.67937	0.70842		0.82752	9.78935E-4		0.85527	0.00184
0.51511	0.63496		0.60342	0.75855		0.82851	9.78935E-4		0.85626	0.00184
0.50056	1.77212		0.62601	0.59531		0.8295	9.78935E-4		0.85725	0.00184
0.53037	0.23809		0.31215	0.93086		0.8305	9.78935E-4		0.85824	0.00184
0.47485	1.03126		0.60008	0.45431		0.83149	9.78935E-4		0.85923	0.00184
0.53301	0.62717		0.65047	0.20371		0.83248	9.78935E-4		0.86023	0.00184
0.50471	0.81555		0.61698	1.13183		0.83347	9.78935E-4		0.86122	0.00184
0.53127	0.34748		0.67246	0.52036		0.83446	9.78935E-4		0.86221	0.00184
0.51134	1.14676		0.53369	3.53551		0.835	9.78935E-4		0.8632	0.00184
0.51245	0.903		0.61975	1.05342		0.83545	9.78935E-4		0.86419	0.00184
0.53529	0.98137		0.67973	0.31525		0.83644	9.78935E-4		0.865	0.00184
0.50292	1.78178		0.56414	1.64213		0.83743	9.78935E-4		0.86518	0.00184
0.50001	1.69857		0.63557	0.51219		0.83842	9.78935E-4		0.86617	0.00184
0.65005	0.30765		0.63035	0.66462		0.83941	9.78935E-4		0.86716	0.00184
0.52078	0.95465		0.73419	0.44059		0.84041	9.78935E-4		0.86815	0.00184
0.53388	0.74568		0.93887	0.20067		0.8414	9.78935E-4		0.86914	0.00184
0.52583	0.71976		0.35997	0.20779		0.84239	9.78935E-4		0.87014	0.00184
0.47404	2.5925		0.63555	0.95001		0.84338	9.78935E-4		0.87113	0.00184
0.50445	2.3366		0.60411	0.61049		0.84437	9.78935E-4		0.87212	0.00184
0.53116	0.38264		0.66251	0.38418		0.845	9.78935E-4		0.87311	0.00184
0.48814	1.48052		0.61505	0.7635		0.84536	9.78935E-4		0.8741	0.00184
0.52103	0.64848		0.66248	2.12647		0.84635	9.78935E-4		0.875	0.00184
0.50348	1.71464		0.59729	1.99467		0.84734	9.78935E-4		0.87509	0.00184
0.49968	1.76319		0.59092	1.91401		0.84833	9.78935E-4		0.87608	0.00184
0.4977	0.39466		0.61374	1.30097		0.84932	9.78935E-4		0.87707	0.00184
0.51565	0.5233		0.62483	0.25142		0.85032	9.78935E-4		0.87806	0.00184
0.50648	0.97137		0.6592	0.34039		0.85131	9.78935E-4		0.87905	0.00184
0.496	0.26939		0.62716	0.47201		0.8523	9.78935E-4		0.88005	0.00184
0.50403	0.86401		0.58242	1.42832		0.85329	9.78935E-4		0.88104	0.00184
0.51698	0.39536		0.64727	0.23382		0.85428	9.78935E-4		0.88203	0.00184
0.52893	0.2508		0.59444	0.40121		0.855	9.78935E-4		0.88302	0.00184
0.50096	0.82664		0.6382	0.73689		0.85527	9.78935E-4		0.88401	0.00184
0.47439	1.46978		0.59422	1.45559		0.85626	9.78935E-4		0.885	0.00184
0.49772	0.43832		0.64063	0.4532		0.85725	9.78935E-4		0.885	0.00184
0.56015	0.26982		0.68062	0.37096		0.85824	9.78935E-4		0.88599	0.00184
0.41078	4.4589		0.7364	0.45208		0.85923	9.78935E-4		0.88698	0.00184
0.71874	0.51412		0.62894	1.10322		0.86023	9.78935E-4		0.88797	0.00184
0.50911	0.46445		0.62249	0.26957		0.86122	9.78935E-4		0.88896	0.00184
0.49912	0.28311		0.59991	0.45588		0.86221	9.78935E-4		0.88995	0.00184
0.50174	4.03941		0.64437	0.32737		0.8632	9.78935E-4		0.89095	0.00184
0.49485	0.33437		0.65888	1.40866		0.86419	9.78935E-4		0.89194	0.00184
0.50216	1.61901		0.64521	0.72791		0.865	9.78935E-4		0.89293	0.00184
0.48316	1.36682		0.6469	0.21905		0.86518	9.78935E-4		0.89392	0.00184
0.4921	0.79617		0.63654	0.43848		0.86617	9.78935E-4		0.89491	0.00184
0.5043	0.56663		0.6189	1.49866		0.86716	9.78935E-4		0.895	0.00184
0.4783	0.54318		0.65815	1.88491		0.86815	9.78935E-4		0.8959	0.00184
0.50806	0.26343		0.63334	0.32445		0.86914	9.78935E-4		0.89689	0.00184
0.51602	0.67511		0.60852	0.26707		0.87014	9.78935E-4		0.89788	0.00184
0.5179	0.32071		0.61904	1.37709		0.87113	9.78935E-4		0.89887	0.00184
0.51975	0.4121		0.58031	0.64755		0.87212	9.78935E-4		0.89986	0.00184
0.5172	0.48448		0.60733	0.98962		0.87311	9.78935E-4		0.90086	0.00184
0.49402	0.29645		0.54563	1.62024		0.8741	9.78935E-4		0.90185	0.00184
0.49225	1.23471		0.64854	0.36203		0.875	9.78935E-4		0.90284	0.00184
0.5032	0.29837		0.65629	0.74737		0.87509	9.78935E-4		0.90383	0.00184
0.49552	1.68306		0.60058	0.63892		0.87608	9.78935E-4		0.90482	0.00184
0.47386	4.44734		0.68569	0.25886		0.87707	9.78935E-4		0.905	0.00184
0.48493	0.6505		0.6323	0.23028		0.87806	9.78935E-4		0.90581	0.00184
0.51877	0.73434		0.63846	0.34326		0.87905	9.78935E-4		0.9068	0.00184
0.49881	2.29439		0.64973	1.35508		0.88005	9.78935E-4		0.90779	0.00184
0.52019	0.68634		0.64198	0.59514		0.88104	9.78935E-4		0.90878	0.00184
0.55554	0.20276		0.65181	1.068		0.88203	9.78935E-4		0.90977	0.00184
0.51188	0.76127		0.64903	0.9429		0.88302	9.78935E-4		0.91077	0.00184
0.54463	0.27694		0.62841	0.84802		0.88401	9.78935E-4		0.91176	0.00184
0.49955	0.66647		0.64503	0.98447		0.885	9.78935E-4		0.91275	0.00184
0.50329	2.06413		0.64593	1.67048		0.885	9.78935E-4		0.91374	0.00184
0.49631	1.73592		0.63858	0.34285		0.88599	9.78935E-4		0.91473	0.00184
0.64136	0.45291		0.63151	0.35405		0.88698	9.78935E-4		0.915	0.00184
0.49362	0.7038		0.63375	1.67798		0.88797	9.78935E-4		0.91572	0.00184
0.57273	0.55092		0.61473	0.46981		0.88896	9.78935E-4		0.91671	0.00184
0.47539	1.97879		0.67455	0.21296		0.88995	9.78935E-4		0.9177	0.00184
0.51391	1.56858		0.6068	0.8324		0.89095	9.78935E-4		0.91869	0.00184
0.49787	3.82264		0.66254	0.23968		0.89194	9.78935E-4		0.91968	0.00184
0.4885	0.67959		0.63886	1.5039		0.89293	9.78935E-4		0.92068	0.00184
0.4823	3.29084		0.65045	0.97187		0.89392	9.78935E-4		0.92167	0.00184
0.56939	1.34514		0.62721	0.56557		0.89491	9.78935E-4		0.92266	0.00184
0.64832	0.31888		0.66553	0.23561		0.895	9.78935E-4		0.92365	0.00184
0.45304	5.73121		0.63484	1.00127		0.8959	9.78935E-4		0.92464	0.00184
0.52253	0.22697		0.59448	0.41954		0.89689	9.78935E-4		0.925	0.00184
0.51094	0.51901		0.59967	0.28048		0.89788	9.78935E-4		0.92563	0.00184
0.51836	0.30734		0.6492	0.21043		0.89887	9.78935E-4		0.92662	0.00184
0.62502	0.31656		0.65216	1.0661		0.89986	9.78935E-4		0.92761	0.00184
0.57305	0.30299		0.61698	0.52571		0.90086	9.78935E-4		0.9286	0.00184
0.51045	1.67898		0.62504	1.56178		0.90185	9.78935E-4		0.92959	0.00184
0.47184	0.91919		0.77945	0.20593		0.90284	9.78935E-4		0.93059	0.00184
0.52746	0.63494		0.62696	0.53098		0.90383	9.78935E-4		0.93158	0.00184
0.51481	1.55409		0.71759	0.22121		0.90482	9.78935E-4		0.93257	0.00184
0.50538	0.34817		0.64485	0.36661		0.905	9.78935E-4		0.93356	0.00184
0.51623	0.33203		0.60003	0.76431		0.90581	9.78935E-4		0.93455	0.00184
0.50116	3.32387		0.76558	0.36556		0.9068	9.78935E-4		0.935	0.00184
0.50924	0.26109		0.66529	0.66063		0.90779	9.78935E-4		0.93554	0.00184
0.48501	0.78834		0.65953	0.46012		0.90878	9.78935E-4		0.93653	0.00184
0.46593	3.41186		0.778	0.34672		0.90977	9.78935E-4		0.93752	0.00184
0.51054	1.89948		0.5987	1.02141		0.91077	9.78935E-4		0.93851	0.00184
0.46215	0.22569		0.64182	0.7269		0.91275	9.78935E-4		0.9395	0.00184
0.51525	0.77693		0.62795	0.28353		0.91374	9.78935E-4		0.9405	0.00184
0.47217	3.16159		0.66714	0.41035		0.91473	9.78935E-4		0.94149	0.00184
0.52087	1.06784		0.65585	0.90292		0.915	9.78935E-4		0.94248	0.00184
0.52416	0.62335		0.59127	1.2839		0.92068	9.78935E-4		0.94347	0.00184
0.54475	0.21047		0.67209	0.3785		0.92167	9.78935E-4		0.94446	0.00184
0.50603	1.05075		0.65715	0.35107		0.92365	9.78935E-4		0.945	0.00184
0.51086	0.92437		0.64618	1.23611		0.925	9.78935E-4		0.94545	0.00184
0.50137	1.26073		0.64014	0.41042		0.92563	9.78935E-4		0.94842	0.00184
0.50308	1.53971		0.65618	0.58729		0.92662	9.78935E-4		0.94941	0.00184
0.51982	1.14639		0.19393	1.61362		0.92761	9.78935E-4		0.95041	0.00184
0.49515	0.87869		0.63558	0.20717		0.93257	9.78935E-4		0.9514	0.00184
0.29507	0.2405		0.77855	0.30293		0.93356	9.78935E-4		0.95338	0.00184
0.58561	0.62403		0.66628	0.53672		0.93455	9.78935E-4		0.95437	0.00184
0.66931	0.27893		0.62671	0.27296		0.935	9.78935E-4		0.955	0.00184
0.5195	0.66064		0.62849	0.50947		0.945	9.78935E-4		0.95536	0.00184
0.55927	0.2976		0.6055	1.93392		0.955	9.78935E-4		0.95635	0.00184
0.49281	0.96403		0.57902	0.44354		0.965	9.78935E-4		0.965	0.00184
0.46328	0.34422		0.62051	0.22688		0.975	9.78935E-4		0.975	0.00184
0.51592	1.20691		0.77856	0.24034		0.985	9.78935E-4		0.985	0.00184
0.75248	0.24447		0.6425	3.86811		0.995	9.78935E-4		0.995	0.00184
0.52626	0.78036		0.66038	0.47259
0.49724	1.00341		0.13795	3.71285
0.53426	0.32411		0.96176	0.20518
0.52941	0.75485		0.9897	0.24496
0.49023	0.29591		0.91731	0.27267
0.48251	1.46732		0.92771	0.22125
0.52811	0.21129		0.58431	2.50781
0.51276	1.00611		0.62301	0.21074
0.54973	0.53021		0.61899	0.2026
0.49768	3.26697		0.64846	1.9588
0.50853	0.47149		0.6246	2.16502
0.52498	0.88345		0.64302	1.1062
0.51513	1.67251		0.65879	2.52859
0.4843	2.04364		0.6661	0.21271
0.53239	1.10289		0.61799	0.60783
0.5056	1.07073		0.56795	1.33494
0.50215	0.644		0.60837	1.56981
0.70161	0.20718		0.63279	0.90273
0.5297	1.19593		0.63168	0.75338
0.46756	0.77189		0.97971	0.22616
0.50407	3.02227		0.99583	0.29846
0.50899	0.65496		0.98718	0.26075
0.55036	0.43828		0.90209	0.22936
0.50519	0.53771		0.98422	0.25271
0.52556	0.48941		0.6447	0.21898
0.43444	0.34904		0.66799	0.32296
0.51079	1.58011		0.66452	0.76949
0.51402	1.63395		0.8758	0.25074
0.51665	2.39935		0.64486	0.31072
0.49174	4.60519		0.64219	0.61997
0.52093	0.34021		0.66417	1.50383
0.50422	1.53084		0.63706	0.83308
0.49324	0.32937		0.63372	0.30576
0.51493	2.57109		0.63814	2.08095
0.75402	0.60059		0.63778	1.42806
0.51742	1.67911		0.61809	1.76276
0.50554	0.52978		0.6508	0.53905
0.5231	0.52201		0.63362	1.19878
0.5044	0.41975		0.59777	0.22135
0.4848	0.84496		0.65397	0.592
0.48683	1.17156		0.68375	0.22035
0.49973	1.74419		0.64872	0.37829
0.51389	1.95564		0.59288	0.54109
0.53007	0.54789		0.64733	0.57629
0.50333	0.96169		0.62327	0.23266
0.51792	1.44668		0.62032	2.31497
0.52342	0.93859		0.63051	0.61101
0.42711	4.47494		0.61049	0.46391
0.50647	2.0523		0.56606	0.3539
0.49546	0.99516		0.58438	1.26629
0.60804	0.23205		0.73715	0.24827
0.51696	0.87536		0.64168	0.46607
0.52468	0.47505		0.69124	0.25965
0.49098	1.2473		0.63726	0.2159
0.49807	0.28352		0.67804	0.27903
0.54782	0.24704		0.64681	0.69693
0.47214	0.38349		0.62921	0.40703
0.47472	0.59527		0.45377	0.37256
0.53314	0.3715		0.65819	0.40705
0.51692	0.92469		0.61316	0.63926
0.47835	0.75721		0.61858	1.71947
0.53057	0.21509		0.60895	18.2497
0.45865	1.83459		0.65106	1.05899
0.52114	1.54373		0.63634	0.96005
0.52875	0.76242		0.66736	0.43705
0.48772	0.40006		0.62985	0.23023
0.49479	1.30141		0.63271	0.29489
0.5194	1.75455		0.61575	0.20275
0.52626	0.39554		0.57422	3.62773
0.52675	0.47724		0.65125	0.46243
0.50875	0.63291		0.65159	1.08269
0.50366	3.38381		0.60417	0.66526
0.46831	0.48318		0.71541	0.23622
0.51026	1.61238		0.63814	0.34356
0.45928	0.70074		0.64566	0.4629
0.38721	2.26586		0.64973	0.21568
0.49135	0.86225		0.59626	1.55356
0.50616	0.8956		0.42504	0.34477
0.49632	1.72816		0.62597	0.58647
0.46858	3.61956		0.58819	1.31769
0.51238	0.58324		0.60425	0.78645
0.4766	1.09873		0.66418	0.409
0.54972	0.22534		0.63122	1.87574
0.5556	1.18952		0.6513	0.36459
0.51002	1.62334		0.62658	2.56434
0.52179	0.89166		0.62933	0.73486
0.40541	0.69283		0.70268	1.58421
0.49626	2.95989		0.63788	0.61371
0.49184	0.48965		0.61606	0.46975
0.51413	0.224		0.63861	0.22201
0.47788	1.98966		0.6186	2.81807
0.50443	1.90783		0.6469	0.46229
0.61678	0.21944		0.65554	1.07907
0.51542	2.27503		0.6796	0.21881
0.51198	0.71637		0.5925	0.77888
0.68864	0.83164		0.53661	0.22768
0.46949	3.53031		0.65288	0.49045
0.49735	1.21266		0.67162	0.46692
0.48802	0.57505		0.61241	0.52649
0.50408	1.58071		0.64274	0.33208
0.50601	2.30188		0.57586	1.60731
0.4914	0.67034		0.65398	1.11952
0.51479	1.2301		0.61284	0.5509
0.46004	1.48241		0.60647	0.98495
0.52796	1.08627		0.60995	1.04917
0.50303	0.75748		0.63615	0.92787
0.50724	0.49133		0.62258	0.80896
0.6787	1.50986		0.61715	0.21057
0.49328	0.54598		0.63723	0.30933
0.50575	1.2059		0.65844	1.54116
0.51531	1.56594		0.66508	0.23121
0.51823	1.81455		0.62638	1.16663
0.49167	0.37815		0.65389	0.70628
0.5377	0.56537		0.62652	0.88623
0.4782	1.30522		0.61288	0.51163
0.53479	0.96091		0.62884	0.49119
0.51366	2.56215		0.61903	1.20222
0.52178	0.28208		0.66089	0.51406
0.50386	0.9744		0.56467	0.20364
0.54474	0.77604		0.60236	1.22256
0.55383	0.22909		0.62902	0.63141
0.50373	1.13628		0.65831	0.56699
0.51865	0.45534		0.58806	8.28231
0.51626	1.89038		0.20136	0.42895
0.46906	0.82753		0.58354	0.90808
0.58705	0.4387		0.64342	0.3307
0.49784	0.6602		0.60039	2.24422
0.50862	1.67733		0.64772	0.56682
0.4072	0.99416		0.59421	1.05172
0.52972	0.86123		0.61009	2.93535
0.51499	1.83603		0.64106	0.73439
0.51289	0.77151		0.63402	1.11588
0.5036	0.98187		0.59881	10.7118
0.51084	2.34279		0.61252	0.8417
0.51109	0.44064		0.64458	1.40963
0.39414	0.20362		0.63831	2.01552
0.29511	0.21042		0.47371	0.71965
0.51139	0.36324		0.61756	0.41551
0.47428	2.22406		0.63323	0.43497
0.53575	0.38967		0.61185	0.60478
0.47986	0.71066		0.58878	1.12609
0.61256	0.20097		0.65431	0.39811
0.49485	0.80784		0.62486	2.09091
0.50108	0.36629		0.62081	0.36508
0.5561	2.61592		0.65991	1.48412
0.48278	3.69893		0.60799	0.68004
0.51943	0.39438		0.61303	0.69316
0.4974	1.00216		0.66588	0.22209
0.49167	1.23148		0.26686	0.21892
0.51524	0.47124		0.6383	0.62632
0.52581	0.28084		0.66621	0.24569
0.53049	0.25792		0.59145	1.40771
0.48964	0.25263		0.64027	2.02119
0.51897	0.6453		0.62012	1.18971
0.56158	0.59787		0.59353	2.26486
0.49598	0.77938		0.64684	2.96586
0.49104	0.90592		0.61835	0.29182
0.514	1.30898		0.6235	1.26414
0.50496	1.51487		0.63556	0.26016
0.51478	1.62988		0.65492	0.37537
0.51998	0.45362		0.7155	0.42159
0.49127	0.94676		0.71717	0.3148
0.50107	0.8903		0.62695	1.39922
0.50792	1.19982		0.65667	0.55807
0.50845	0.30732		0.62569	0.50386
0.51065	0.67968		0.73535	0.28232
0.50082	1.18744		0.65864	0.64326
0.49198	0.97404		0.60642	0.23541
0.50871	0.70211		0.9722	0.21758
0.51671	2.21533		0.57691	0.23447
0.50794	1.07694		0.59002	0.56398
0.50975	0.73379		0.67929	0.35085
0.50278	0.78151		0.46838	0.21305
0.69803	0.25012		0.6492	0.92016
0.53857	0.25837		0.64437	0.34767
0.52316	0.34746		0.58029	0.31484
0.49599	0.80403		0.62333	0.89992
0.52128	0.49789		0.6218	1.52185
0.5113	0.66361		0.58927	1.05135
0.5014	0.32283		0.63502	1.99291
0.54768	0.50739		0.61284	0.22586
0.49417	1.39119		0.67911	0.27597
0.48183	1.30367		0.62778	0.37497
0.50645	2.17912		0.62763	0.25702
0.50448	1.23692		0.65454	0.3967
0.72897	0.30985		0.61059	0.37048
0.58142	1.93083		0.72352	0.82475
0.46403	0.206		0.65336	0.22496
0.51877	0.45093		0.55259	0.83834
0.52791	0.61261		0.64901	0.31601
0.52104	1.42303		0.6283	1.19099
0.50576	3.57215		0.70383	0.73195
0.54611	0.47686		0.61451	2.67656
0.50826	1.73185		0.66362	1.17901
0.5229	1.22688		0.61307	0.53472
0.48697	0.71383		0.6019	0.29229
0.50454	0.65635		0.63924	0.418
0.508	1.73538		0.68254	0.27218
0.55451	0.31526		0.63938	3.02521
0.56584	0.2301		0.68625	0.35069
0.47936	0.514		0.66155	0.37572
0.51528	0.32638		0.63703	0.26517
0.75306	0.58319		0.31613	0.77731
0.57379	0.21828		0.61319	0.33729
0.49354	2.25287		0.60654	0.97993
0.49296	0.82693		0.69501	0.2436
0.50443	1.24415		0.69002	0.20761
0.55327	0.21406		0.67108	0.25126
0.46349	2.7591		0.68113	0.29793
0.50765	0.5315		0.63969	1.23952
0.51233	0.37084		0.64083	1.44177
0.51337	1.68409		0.64322	2.7671
0.52107	1.22663		0.64228	0.40418
0.52004	1.18268		0.66141	0.82206
0.51445	0.52649		0.63417	0.79628
0.47999	0.28717		0.6593	0.76404
0.50411	2.29617		0.67204	1.29681
0.52097	0.58732		0.65135	1.50777
0.51259	0.27045		0.64054	0.9101
0.48823	0.45108		0.5882	2.58338
0.5015	2.64296		0.64579	0.39394
0.51437	0.52017		0.63489	0.57501
0.53954	0.36625		0.67675	1.0765
0.3769	0.5067		0.59877	2.46115
0.53348	0.32436		0.60948	1.35092
0.46107	1.3842		0.64075	0.73698
0.57183	0.24725		0.38454	0.56656
0.4592	0.73305		0.63065	1.07329
0.49039	2.5675		0.6768	0.23916
0.49292	0.92062		0.62952	1.15076
0.52012	1.82783		0.55458	0.58402
0.50618	1.0094		0.44652	0.37702
0.50853	0.46141		0.6807	0.2797
0.50946	0.65418		0.65527	1.07986
0.43601	0.29396		0.62358	0.89165
0.48727	7.3755		0.6426	0.57853
0.52625	0.32247		0.62906	0.51357
0.50218	0.66406		0.55054	0.43203
0.51474	0.8835		0.95895	0.23551
0.49656	2.24846		0.94847	0.21684
0.49853	0.52445		0.614	0.96116
0.4602	0.94583		0.58833	0.52969
0.43529	2.58119		0.66476	0.40514
0.52512	0.35931		0.59809	1.79506
0.51729	0.25788		0.64349	0.33475
0.46734	1.05653		0.63907	0.54234
0.52374	1.20476		0.66527	0.26711
0.47063	1.01795		0.58841	0.71511
0.47721	4.18112		0.62609	0.52474
0.49802	1.59754		0.44192	0.24257
0.50816	0.41125		0.62056	0.34657
0.47911	1.0832		0.57301	0.66901
0.47775	0.20564		0.54532	0.64642
0.50359	1.59207		0.65264	0.34271
0.52589	0.22241		0.54832	0.24683
0.50274	0.41889		0.6255	0.44932
0.50776	1.88179		0.67492	0.23999
0.45979	1.46404		0.60172	2.11798
0.51287	1.24661		0.62242	0.62013
0.51926	0.22171		0.64937	1.03315
0.48671	0.40754		0.28444	0.39104
0.56487	0.91907		0.61662	0.63889
0.45728	0.453		0.63135	0.32763
0.49647	1.23135		0.63774	0.75921
0.50494	1.49027		0.6041	0.3544
0.50296	0.4997		0.1872	0.30606
0.51234	1.61839		0.6487	0.21776
0.48623	0.35651		0.41284	0.23824
0.499	0.65246		0.6181	0.56221
0.5077	1.4024		0.59805	0.26002
0.47177	2.81612		0.6485	0.38992
0.48393	0.36295		0.63151	2.18691
0.51895	0.55816		0.6206	0.63913
0.62014	0.22232		0.88273	0.21803
0.49724	1.73338		0.64607	1.41811
0.51047	0.89704		0.67339	0.27538
0.49766	0.48814		0.6701	0.2915
0.5004	0.53307		0.65616	0.23094
0.50347	0.38363		0.65412	0.51925
0.52543	2.1641		0.61597	0.4599
0.49848	1.11366		0.59681	0.31049
0.40658	4.64243		0.63505	1.44629
0.52859	0.35068		0.61075	0.36171
0.54362	0.84995		0.66253	0.45161
0.48707	0.63159		0.62572	0.77155
0.50428	0.42086		0.7083	0.35744
0.704	0.37999		0.67325	0.36635
0.5026	0.84519		0.71184	0.21136
0.50779	0.92282		0.62896	0.71883
0.51228	1.25494		0.60256	1.22392
0.52129	0.57452		0.57203	1.35072
0.46799	0.29123		0.96811	0.25717
0.51722	1.21566		0.91807	0.29683
0.50147	1.27129		0.56571	0.696
0.50058	0.767		0.61798	2.51311
0.49419	0.31638		0.66135	1.4177
0.4974	1.20356		0.46859	1.60681
0.46176	1.51948		0.6283	1.67076
0.51794	1.81153		0.6722	0.48529
0.48572	1.90994		0.63486	1.14363
0.54449	0.54957		0.64309	0.95356
0.49297	2.87877		0.61531	1.80405
0.60413	0.49174		0.65576	0.49582
0.50301	1.29904		0.64194	0.28848
0.49435	0.61743		0.59587	1.05175
0.507	0.81913		0.62143	0.82796
0.53792	3.20797		0.60634	0.75438
0.51279	1.15402		0.67565	1.39776
0.505	0.45823		0.67021	0.36067
0.47384	1.44916		0.69833	0.22726
0.505	0.21957		0.73899	0.29087
0.52714	0.64027		0.60572	1.75877
0.51672	1.10312		0.62949	0.22931
0.49975	1.26278		0.6389	0.63299
0.48958	0.40217		0.60486	0.78778
0.57647	0.24947		0.58053	0.49545
0.53496	0.37441		0.63473	1.35197
0.50069	0.42596		0.60576	0.8648
0.53237	0.26677		0.68252	0.24695
0.51356	2.733		0.66066	0.23104
0.52761	1.02447		0.58695	0.30901
0.52938	0.21063		0.59679	0.30283
0.50569	0.76875		0.57098	1.23553
0.52584	0.9412		0.56288	1.07923
0.547	0.26168		0.61962	0.80828
0.5649	0.28175		0.58285	0.25647
0.49306	1.17985		0.61951	0.49399
0.50313	0.92579		0.63743	0.82633
0.48653	0.94966		0.62511	0.65348
0.45223	0.70793		0.64781	0.25332
0.49259	3.92201		0.69334	0.22671
0.49372	1.67079		0.47653	0.83885
0.47576	1.14916		0.65714	0.81904
0.49396	1.40093		0.61395	1.95019
0.5053	3.68945		0.62384	2.05124
0.48814	1.54431		0.66904	0.34645
0.45068	0.43943		0.59857	0.34452
0.49589	1.463		0.64653	1.25931
0.52818	0.72324		0.63281	1.40638
0.49722	1.42359		0.61164	0.9222
0.52711	0.85985		0.65513	0.73321
0.52728	0.38246		0.6446	0.21693
0.51322	0.32326		0.56898	0.41975
0.49861	0.41971		0.62919	0.29599
0.50096	3.22803		0.57244	0.95557
0.49837	0.48503		0.65733	0.78231
0.48193	3.32516		0.6221	0.29447
0.54724	0.21278		0.65209	0.79774
0.52296	0.28327		0.63864	0.29889
0.51118	0.46053		0.59647	1.17558
0.53245	0.62284		0.63198	0.64484
0.65751	1.71365		0.53484	0.35396
0.52968	0.48452		0.60504	0.33934
0.51239	2.41501		0.6095	0.89729
0.50389	0.46682		0.62871	1.85847
0.51673	1.3606		0.6634	0.34714
0.50139	0.58336		0.60551	0.21606
0.5184	1.41163		0.61999	1.87256
0.51161	0.26781		0.62123	0.47334
0.4906	0.48375		0.56254	0.2591
0.51591	2.55937		0.59641	0.47724
0.49003	0.70998		0.61527	0.53106
0.44809	0.46705		0.68427	0.29046
0.50508	0.82177		0.59993	0.93455
0.49609	0.95621		0.73636	0.2554
0.54028	0.76979		0.62577	0.74309
0.51035	0.38366		0.63502	1.24387
0.49479	3.74667		0.62447	2.34839
0.52519	0.21009		0.64699	1.37365
0.49427	1.50632		0.64961	0.32121
0.49587	0.82152		0.65462	0.40178
0.50109	2.67463		0.59218	0.24582
0.49075	0.5223		0.66961	1.0786
0.54525	0.21639		0.61282	0.5473
0.48934	0.28733		0.618	0.51066
0.52216	0.39045		0.72547	1.56271
0.5442	0.98555		0.56582	0.97163
0.51504	0.62258		0.72642	1.38418
0.52251	0.32704		0.63496	0.99213
0.47578	0.87846		0.62502	2.0403
0.47579	0.2812		0.63796	0.92266
0.54883	0.33113		0.63488	0.37503
0.53709	0.44766		0.64051	0.39442
0.49472	1.21598		0.60791	1.23786
0.49533	1.7477		0.61679	1.21087
0.52371	0.32298		0.62509	0.28416
0.50208	0.96047		0.61088	0.72887
0.54663	0.38165		0.63258	0.20311
0.50542	0.7187		0.58774	1.56637
0.49659	0.38337		0.61754	1.07527
0.51562	0.37459		0.66009	0.25963
0.52116	0.37538		0.62858	1.14971
0.52132	0.44941		0.63821	1.82959
0.46813	3.08048		0.66111	0.35779
0.51064	1.06374		0.65241	0.3909
0.51865	0.91042		0.59873	0.41039
0.49561	0.31674		0.63833	0.61375
0.51346	1.44882		0.30623	0.25144
0.53362	0.26252		0.69031	0.41156
0.50129	0.74769		0.64675	0.76751
0.51388	1.63787		0.63217	1.76096
0.4955	0.5249		0.68266	0.21897
0.37116	2.60347		0.61442	0.48716
0.52351	0.3774		0.58554	2.77443
0.51549	1.85574		0.60351	0.93133
0.7735	0.73026		0.65318	0.28659
0.50352	1.40669		0.64539	0.51527
0.51631	0.75288		0.59789	0.25893
0.4954	0.68539		0.58778	0.25168
0.47591	0.53142		0.59939	1.89995
0.49055	0.86517		0.76048	0.23834
0.55607	0.57009		0.60933	0.31929
0.49972	0.42165		0.60258	0.30384
0.52833	1.38258		0.63933	0.3452
0.60182	0.3681		0.59661	0.24736
0.51487	0.25853		0.65829	0.21264
0.46651	0.71048		0.96074	0.26588
0.67859	0.5128		0.61208	0.59212
0.4894	0.23969		0.63084	0.27596
0.51844	1.82718		0.58968	0.41666
0.50736	1.51037		0.61498	0.33094
0.51127	2.0467		0.63478	0.37798
0.52407	0.57403		0.60948	0.29243
0.5017	0.43001		0.59187	0.41812
0.51025	2.03056		0.62761	0.53956
0.50341	1.6946		0.64957	0.66126
0.51921	1.21149		0.62785	0.46399
0.51595	1.14683		0.45152	2.3181
0.48655	0.31548		0.6355	1.2847
0.36858	1.99513		0.55335	0.64288
0.48801	0.27975		0.65404	1.02686
0.5238	2.25779		0.62734	3.64224
0.50367	3.25103		0.66139	0.44197
0.49457	0.44749		0.63181	0.50342
0.52472	0.3146		0.32656	0.60495
0.51466	0.93303		0.61664	0.43147
0.41012	1.10638		0.56456	2.78108
0.50791	0.6151		0.67544	0.22886
0.48921	0.60294		0.61233	0.91548
0.5033	0.99607		0.62737	0.54686
0.46051	0.23179		0.63253	0.28698
0.53462	0.7867		0.70342	0.35907
0.4942	1.2324		0.65484	0.24349
0.52334	1.01708		0.62869	0.29854
0.4884	0.5565		0.61958	0.49091
0.49435	0.97085		0.62	0.83372
0.51697	2.00603		0.62692	0.26927
0.50938	3.78397		0.68649	0.20353
0.50061	0.24634		0.638	0.82366
0.54955	0.56784		0.56334	0.51939
0.52035	0.37099		0.61476	0.25363
0.50105	4.49788		0.64657	0.35055
0.4946	0.75755		0.6284	0.77503
0.52542	0.95016		0.61483	0.70017
0.5059	0.41827		0.60434	1.30142
0.55876	0.6266		0.63221	0.46233
0.23242	0.40358		0.55779	0.59916
0.65592	0.46502		0.64302	0.31189
0.57695	0.27532		0.66738	0.37605
0.59655	0.74513		0.72944	0.32461
0.49003	1.98822		0.58253	1.54519
0.49981	2.185		0.57504	2.29602
0.50607	1.4329		0.60657	1.76307
0.52543	0.42789		0.60169	1.9553
0.50225	4.17926		0.61741	0.50682
0.41033	0.4135		0.62936	0.70882
0.75222	0.20612		0.61139	0.86244
0.50097	0.28241		0.66161	0.3667
0.51611	0.56405		0.61229	0.86383
0.53099	0.44686		0.63121	1.56473
0.51647	0.64154		0.63383	0.71758
0.5038	0.97456		0.61	1.31799
0.53917	0.56265		0.59976	2.22669
0.52254	1.53597		0.59241	0.95638
0.42437	0.37023		0.47627	0.81672
0.50709	5.12638		0.61299	1.17045
0.5325	0.35631		0.59738	0.28339
0.49586	0.80724		0.63066	0.2671
0.41027	0.76369		0.69219	0.27808
0.46715	0.53093		0.632	0.68642
0.50614	0.67653		0.4586	0.44661
0.44876	0.79879		0.57913	2.47816
0.51618	0.4152		0.67918	0.20566
0.56282	0.2184		0.63212	0.45745
0.47894	2.90703		0.62735	0.46842
0.54169	0.69146		0.61822	1.28527
0.47388	2.04697		0.63789	0.40745
0.62816	0.48499		0.61122	0.39465
0.51947	0.41151		0.62252	0.47875
0.49534	3.02373		0.66436	0.25061
0.58175	0.3907		0.60504	1.20899
0.49327	0.55088		0.61726	0.35359
0.49027	0.55185		0.6148	0.90137
0.51351	0.80873		0.62861	0.63502
0.47591	2.29518		0.6321	0.25027
0.49981	1.77858		0.63504	0.80192
0.50419	2.11884		0.5388	3.12674
0.54298	0.24684		0.63255	0.58664
0.49888	2.49476		0.64443	2.22846
0.45199	2.51786		0.61723	1.08622
0.51223	2.55187		0.57117	0.75164
0.4888	0.7552		0.62525	0.21896
0.49557	1.0762		0.55733	1.73469
0.52271	0.25065		0.58528	0.37042
0.59024	0.25587		0.55676	3.67419
0.50309	1.08614		0.61273	0.74605
0.46557	0.42424		0.60972	0.40047
0.5319	0.3365		0.56977	4.85717
0.55359	0.20521		0.59364	0.76561
0.5436	0.28805		0.39842	0.60778
0.49418	0.41523		0.61801	0.89068
0.52218	1.75094		0.63426	1.17814
0.48769	4.36918		0.61479	0.35084
0.49075	0.3869		0.57141	0.76459
0.47472	1.48215		0.61058	4.10319
0.5006	0.30986		0.65459	0.45425
0.50825	0.25281		0.67185	0.45497
0.49059	1.3467		0.64067	0.34744
0.50987	1.35731		0.6115	0.47926
0.47768	3.77918		0.66384	0.28613
0.4955	0.60229		0.61112	0.64458
0.56186	0.35529		0.6594	0.26568
0.492	1.76748		0.63376	0.84334
0.47085	0.29866		0.63815	0.89143
0.52782	0.32352		0.61543	0.45789
0.49462	3.5554		0.64051	0.50361
0.49432	0.8019		0.70175	0.29236
0.51153	1.87994		0.6052	0.57764
0.46538	0.73137		0.66526	2.27083
0.54613	0.26782		0.60601	1.38882
0.49959	2.31857		0.60631	3.59186
0.50811	0.83152		0.60349	2.99565
0.5137	1.08303		0.71805	0.3801
0.51733	0.56352		0.61507	0.35786
0.45671	1.42716		0.60021	1.04938
0.59142	0.20519		0.5996	3.2109
0.4844	2.49813		0.64982	0.7484
0.48683	0.36386		0.60256	0.81655
0.50793	0.33014		0.63176	0.68972
0.48197	1.21573		0.63319	0.74698
0.5527	0.20027		0.61036	1.23113
0.47711	2.059		0.69744	0.84002
0.49752	1.15901		0.6039	1.13457
0.48725	1.80437		0.66138	0.54845
0.9087	0.25492		0.6165	0.3899
0.48614	1.28208		0.63601	0.81159
0.48824	0.82104		0.62176	0.28654
0.4048	2.00135		0.54625	0.34268
0.50711	0.39633		0.63988	0.46491
0.47371	0.77826		0.63875	1.30459
0.49397	2.81896		0.62374	0.27323
0.51768	1.09641		0.69589	0.33549
0.64195	0.31143		0.66088	0.53911
0.48806	2.53381		0.64797	1.11781
0.53323	0.55455		0.63552	0.39768
0.49855	1.63621		0.67228	0.237
0.96184	0.22523		0.60745	0.73225
0.5128	0.31907		0.6497	0.74155
0.4858	8.31371		0.64932	0.24585
0.53873	0.58245		0.68521	0.37185
0.52603	0.86508		0.64465	0.65885
0.57032	0.20599		0.61864	0.24223
0.49633	0.32582		0.62098	1.5709
0.49991	1.87832		0.58262	3.3374
0.51211	0.43138		0.55573	1.35709
0.52888	0.3674		0.63134	0.21223
0.49186	0.48393		0.59016	0.52783
0.50878	2.01067		0.6527	7.03995
0.57136	0.29543		0.68601	0.27836
0.48976	1.47492		0.65293	0.21511
0.5077	1.28624		0.65197	0.34968
0.50466	0.6142		0.64933	1.55822
0.51797	2.78319		0.61683	2.53183
0.4972	0.51522		0.63087	0.61367
0.49353	0.69581		0.66179	2.2758
0.51854	1.00234		0.62836	1.0222
0.58912	0.55495		0.62326	2.81579
0.46486	0.2152		0.58026	0.99844
0.50624	2.05897		0.64567	0.2919
0.45688	0.5169		0.98173	0.208
0.52398	0.50515		0.5042	0.37982
0.46274	1.00748		0.63671	0.3308
0.4419	3.18205		0.66224	0.31011
0.60569	0.48995		0.58863	0.25176
0.48915	0.3546		0.65107	0.84865
0.49653	0.45484		0.63375	4.72354
0.49673	1.61114		0.6065	0.21597
0.47716	0.95942		0.62915	1.96772
0.59454	0.35182		0.37585	2.20351
0.44283	1.37694		0.63294	0.8794
0.4976	1.20433		0.6175	0.71381
0.51667	0.52416		0.65379	0.76632
0.5812	0.35631		0.61894	0.58489
0.53215	0.24847		0.64212	0.3022
0.53351	0.64188		0.62751	0.88019
0.48613	0.36023		0.66192	0.21703
0.51416	0.98409		0.63165	0.60723
0.51117	0.48578		0.67034	0.2998
0.5364	0.2056		0.62976	1.70992
0.51264	0.33837		0.26086	1.6381
0.51245	1.28505		0.63518	0.79114
0.52085	1.30434		0.65771	0.2783
0.51725	2.70737		0.63146	0.63098
0.50564	0.97243		0.64111	0.32259
0.48597	0.78877		0.62466	0.86534
0.50994	0.28638		0.63382	0.71552
0.61379	0.20457		0.56426	1.62799
0.55279	0.31449		0.64844	0.54309
0.53316	0.27495		0.6354	0.39155
0.49709	1.83683		0.63968	0.24198
0.54521	0.21796		0.65427	0.29049
0.51832	0.60156		0.56265	0.28243
0.4957	0.21691		0.63426	1.91168
0.49881	1.50068		0.60719	2.30109
0.51853	0.66816		0.58834	0.27528
0.5923	0.418		0.66333	0.33759
0.45693	0.75963		0.66154	0.72349
0.5115	0.69837		0.59484	0.69467
0.51222	0.54745		0.61787	1.03484
0.49325	0.61694		0.63042	1.33697
0.45209	0.31528		0.63201	1.44142
0.45835	3.19083		0.64089	0.2583
0.60929	0.21235		0.6173	0.58473
0.49124	0.58915		0.49546	0.57855
0.45302	0.84404		0.59401	0.68995
0.46773	1.44432		0.63534	5.7986
0.51824	0.64255		0.7114	0.79726
0.53791	0.3425		0.62174	2.18597
0.5078	0.4168		0.61835	0.40348
0.51267	1.17178		0.66149	0.34103
0.53382	0.26159		0.60085	1.8602
0.50837	0.52357		0.62669	0.43393
0.51011	0.62378		0.64776	0.30294
0.47229	0.51146		0.64963	0.72354
0.57626	0.39166		0.66797	0.65495
0.34193	0.63949		0.61289	0.69906
0.52063	0.86074		0.55667	6.99889
0.50987	1.97568		0.73433	0.20829
0.50779	0.28736		0.60999	1.63825
0.59481	0.3107		0.45364	0.35285
0.50097	0.77145		0.61575	0.24285
0.48347	3.43119		0.62777	0.87496
0.46473	0.26219		0.63251	0.76878
0.53771	0.43036		0.66939	0.31431
0.50764	1.05124		0.62919	1.74128
0.51464	0.80705		0.60951	0.66838
0.65034	0.26522		0.5808	1.31455
0.54324	0.22434		0.60255	0.24436
0.49795	0.49516		0.65859	0.36482
0.51043	0.87433		0.61275	0.36387
0.68186	0.31313		0.71634	2.1645
0.45549	1.7004		0.65478	1.22921
0.61513	0.22711		0.61328	0.482
0.53789	1.07142		0.68872	0.35436
0.62397	0.23376		0.56011	0.37352
0.48945	2.26622		0.61749	0.49653
0.53046	0.20662		0.60996	1.18652
0.5019	1.20582		0.56148	3.29079
0.25901	0.20073		0.61434	0.65774
0.47806	0.56313		0.63709	1.0621
0.78108	0.2796		0.71255	0.28743
0.50584	0.84162		0.57857	0.69285
0.52642	0.93387		0.10855	3.37639
0.51053	1.69398		0.62555	0.43052
0.48985	0.9203		0.68124	0.21874
0.5233	1.251		0.62895	0.32211
0.52242	0.63425		0.6088	0.79189
0.48353	0.29728		0.62834	0.75922
0.50998	2.22296		0.64238	1.20058
0.14385	1.77366		0.67447	0.84111
0.52228	0.48441		0.66837	0.39735
0.51154	1.53325		0.60325	0.607
0.52419	0.35344		0.60602	1.51684
0.47981	1.54223		0.50138	0.31905
0.49104	1.85963		0.53524	2.74669
0.55048	0.2938		0.67498	0.42291
0.49062	0.84459		0.65518	0.35863
0.36436	3.78899		0.60592	0.69141
0.56481	0.29068		0.63633	0.25248
0.50136	2.3736		0.65249	0.3069
0.52311	1.33088		0.59776	2.38748
0.45702	0.84752		0.60661	0.91406
0.46887	0.59511		0.66593	0.25104
0.52423	0.22737		0.65213	1.2798
0.48118	0.36592		0.6207	1.93035
0.49744	0.96352		0.58601	2.74159
0.49664	0.61389		0.66694	0.67893
0.46093	0.23719		0.57633	2.10103
0.74703	0.58052		0.64912	0.25586
0.4353	1.531		0.11682	0.20146
0.51946	0.34489		0.65516	0.34179
0.49721	0.68433		0.65484	0.26334
0.49274	0.4514		0.63979	0.29143
0.65661	0.21028		0.60595	0.21829
0.47895	0.48056		0.59346	0.78705
0.4925	1.57857		0.642	0.23007
0.5242	0.56181		0.60904	1.68756
0.5085	0.86777		0.67612	0.31673
0.50201	0.20672		0.60701	0.31736
0.4659	0.53727		0.57654	0.47827
0.52908	0.56879		0.61956	0.43221
0.7864	0.29029		0.63376	0.20314
0.56805	0.84317		0.73724	0.2032
0.45398	1.00468		0.61753	0.9191
0.52159	0.7116		0.52854	0.21345
0.56517	0.20232		0.64581	0.93369
0.51131	0.25487		0.6251	0.35519
0.42944	0.77687		0.55408	0.23061
0.48929	0.72122		0.31865	0.20527
0.557	0.22487		0.60785	2.00247
0.49749	0.55127		0.55631	1.99608
0.70386	0.30804		0.59414	1.71867
0.48794	3.78934		0.60812	0.48299
0.52571	0.278		0.60745	0.75994
0.51351	0.84295		0.58244	1.94366
0.49969	0.39177		0.6147	0.25549
0.58808	0.30609		0.608	1.687
0.5148	0.58353		0.60735	0.6743
0.51753	1.36561		0.56667	0.34241
0.43217	0.43412		0.64719	0.3799
0.5014	0.32611		0.61851	0.77677
0.53629	0.49181		0.69955	1.7302
0.49707	0.79738		0.64217	0.2795
0.4945	0.758		0.63199	1.0965
0.69346	0.21543		0.59203	0.61428
0.50685	1.54718		0.60231	0.507
0.56241	0.31343		0.57267	0.29821
0.50368	0.85828		0.62308	0.49041
0.51227	1.2394		0.59441	0.99987
0.51629	0.6228		0.39045	0.97898
0.50006	1.36347		0.63677	1.22696
0.71377	0.43562		0.73143	0.43213
0.50338	2.53121		0.63347	0.81835
0.50226	2.09597		0.636	1.25954
0.53402	0.57819		0.62967	0.45272
0.51867	0.98431		0.62079	2.50821
0.38966	0.21161		0.58743	2.15095
0.5923	0.39068		0.61688	1.4763
0.5453	0.29454		0.61697	0.51021
0.5146	0.4111		0.63463	4.79064
0.48637	0.33117		0.61487	0.90401
0.75761	0.56513		0.67792	0.75583
0.53471	0.7111		0.64406	1.17343
0.50289	0.55216		0.74015	0.74807
0.50522	5.53595		0.58959	0.34368
0.52454	0.86643		0.63876	1.03645
0.50405	1.21561		0.61164	1.70454
0.5204	0.74302		0.66128	0.54609
0.51424	0.63403		0.62732	1.48699
0.4737	0.64498		0.65596	0.97111
0.63124	1.16245		0.64905	1.51533
0.69557	0.34227		0.60325	0.41185
0.50023	1.6861		0.5995	0.51112
0.70849	0.83145		0.59549	0.98551
0.45819	0.84407		0.66305	0.76816
0.57528	0.26919		0.60029	2.66439
0.47979	0.9223		0.61088	0.35564
0.54656	0.28332		0.56275	2.26047
0.47493	1.19854		0.63649	0.42559
0.56203	0.27065		0.57984	1.22373
0.50923	1.30064		0.64982	0.32561
0.53906	0.35725		0.62069	0.67048
0.50327	0.94225		0.59577	0.20001
0.51853	0.57157		0.60197	0.55554
0.51363	1.036		0.51712	0.86004
0.50634	0.55009		0.56277	4.86726
0.49945	0.50926		0.52316	1.49588
0.53488	0.73345		0.56308	0.37424
0.61184	0.59412		0.51354	1.825
0.50869	1.59763		0.52508	0.44768
0.43584	0.95502		0.63828	0.3969
0.50272	2.19855		0.84315	0.34407
0.67205	0.92933		0.59463	0.46275
0.50278	1.29051		0.52377	1.81851
0.51395	0.70855		0.56524	2.27913
0.47093	1.57967		0.54968	0.63124
0.48908	2.29545		0.53094	0.90009
0.49428	1.44221		0.772	1.04713
0.58047	0.21049		0.56451	0.23154
0.7324	0.21288		0.64713	1.41105
0.46961	2.43081		0.59219	1.22316
0.50134	0.35566		0.61457	2.11888
0.51208	1.11833		0.59072	3.54019
0.5145	0.79464		0.58704	1.05971
0.48903	0.20273		0.51655	1.43091
0.53565	0.21886		0.63883	0.26258
0.49729	0.72023		0.66263	0.51837
0.49176	0.67137		0.61827	2.3519
0.5012	0.52377		0.61346	1.06875
0.50096	1.24678		0.62966	0.29508
0.53029	0.87048		0.48687	0.31815
0.54376	0.42172		0.67588	0.7824
0.49553	0.64425		0.61366	0.27043
0.50063	0.41461		0.63008	0.4289
0.42702	2.58314		0.61054	1.09148
0.46993	0.42735		0.60132	0.41541
0.50345	0.4143		0.65103	2.25402
0.48883	0.35192		0.59744	1.11437
0.53569	1.05863		0.54846	1.30933
0.51674	0.87471		0.55019	0.20268
0.5352	0.29182		0.61727	0.92142
0.51408	0.674		0.63154	0.74623
0.45106	0.48138		0.70129	0.90533
0.50614	1.72229		0.64611	0.23099
0.48011	0.33448		0.96691	0.20201
0.4845	0.27075		0.92673	0.22016
0.62174	1.06098		0.95662	0.20133
0.46328	0.44359		0.94246	0.23437
0.52935	0.43934		0.97513	0.21081
0.50336	1.58392		0.90562	0.20201
0.49903	3.5994		0.98946	0.25884
0.51854	1.15973		0.96238	0.21825
0.45081	1.81015		0.91438	0.29031
0.50516	3.0427		0.88535	0.25726
0.52408	0.54683		0.91966	0.23384
0.51137	0.7656		0.33419	0.22672
0.49755	0.56384		0.95539	0.26145
0.51614	0.9349		0.81423	1.31862
0.45402	0.44688		0.46932	0.22956
0.46424	1.05696		0.93933	0.24617
0.52108	1.18627		0.96967	0.2128
0.48435	0.30692		0.98833	0.21352
0.49568	0.24363		0.92083	0.8067
0.48101	0.45225		0.91925	0.25677
0.49466	0.55771		0.93211	0.31335
0.49536	0.68242		0.95125	0.38033
0.53758	0.34317		0.92323	0.38809
0.45349	0.21633		0.96225	0.40564
0.464	2.3304		0.93134	0.33589
0.51326	0.92569		0.95665	0.21429
0.49646	0.68222		0.96912	0.2435
0.55219	0.31841		0.94622	0.63107
0.52737	0.54169		0.94491	0.27161
0.48514	1.4991		0.93948	0.35149
0.54272	0.24849		0.98979	0.23608
0.48077	1.30873		0.92926	0.34497
0.50616	0.99846		0.96637	0.32462
0.55876	0.51731		0.95164	0.2109
0.46951	0.45419		0.96024	0.26256
0.48466	2.27954		0.93142	0.39587
0.49128	0.29704		0.93567	0.25013
0.50756	0.23145		0.952	0.2918
0.47927	0.27446		0.95193	0.30748
0.53167	0.28973		0.90246	0.20713
0.4577	1.42006		0.94345	0.35969
0.50235	2.88564		0.9888	0.25606
0.5069	2.10682		0.98807	0.23018
0.46162	0.62251		0.98346	0.28044
0.5188	0.91644		0.85505	0.20875
0.45789	1.82674		0.89299	0.26753
0.52341	1.12414		0.95565	0.21401
0.46258	0.85146		0.94086	0.38542
0.58866	0.2238		0.99005	0.24516
0.48542	0.43717		0.94101	0.60571
0.51239	0.32243		0.97356	0.22651
0.51461	0.31759		0.89929	0.22807
0.49051	0.98524		0.98758	0.24447
0.45667	0.2101		0.99666	0.24555
0.4733	3.21032		0.95088	0.22734
0.48879	0.63014		0.92916	0.56525
0.42947	1.39261		0.89849	0.35653
0.51444	0.39849		0.96945	0.36379
0.48421	2.36458		0.90147	0.32949
0.55982	0.22711		0.94491	0.47697
0.48882	1.95963		0.96482	0.44689
0.49811	0.4093		0.94976	0.2755
0.51872	1.57401		0.83442	0.23611
0.53787	0.31979		0.93077	0.42074
0.48095	0.6261		0.89635	0.24775
0.50599	0.85894		0.95692	0.21471
0.49338	1.36694		0.95303	0.20482
0.49259	0.38491		0.95708	0.41112
0.42276	0.69216		0.92391	0.21224
0.50328	2.7395		0.98989	0.25183
0.50164	1.38928		0.93349	0.22426
0.49454	0.61758		0.90663	0.20459
0.49642	1.19181		0.74249	0.33116
0.4965	0.70027		0.55845	0.99995
0.30856	0.90329		0.63268	0.66091
0.48582	1.19948		0.67826	0.47427
0.4971	0.52665		0.60515	1.45289
0.51778	0.6348		0.54961	3.01865
0.55613	0.2471		0.54455	0.76757
0.5075	0.5573		0.60875	0.2107
0.51292	1.83094		0.6004	0.20082
0.48369	3.18035		0.54139	0.37984
0.49268	0.91832		0.60653	1.08681
0.6844	0.4118		0.59388	0.65028
0.6305	0.23467		0.62851	0.36367
0.4795	1.62412		0.64937	0.24761
0.66089	0.39101		0.61708	0.31165
0.4969	1.00441		0.6369	2.18824
0.55653	0.41501		0.6389	0.59127
0.50731	0.35906		0.69704	0.39246
0.47482	2.08224		0.64772	0.22667
0.51487	1.24728		0.65687	0.75634
0.46134	0.69552		0.66889	0.31786
0.50769	1.95278		0.61505	0.88106
0.48754	1.30218		0.64755	1.73018
0.47318	1.29091		0.72704	0.27339
0.4628	0.20371		0.6344	0.5143
0.47054	1.01571		0.60711	0.34465
0.51122	0.49083		0.60675	0.26006
0.52321	1.10695		0.64132	0.20405
0.43261	0.28527		0.66462	0.5192
0.48841	0.41605		0.62202	0.21894
0.39425	0.56733		0.61066	0.83811
0.4924	1.68454		0.61001	0.66734
0.48759	0.35852		0.64035	0.28279
0.5082	1.13129		0.6303	0.77877
0.50332	1.18542		0.59466	0.33639
0.48365	0.23604		0.6971	0.26461
0.52518	0.67384		0.64191	0.25462
0.70654	0.93751		0.47796	0.23353
0.48476	0.28828		0.63894	1.01851
0.49901	1.61649		0.4607	0.35418
0.44245	1.67516		0.59791	2.60247
0.45433	0.80503		0.62985	1.43889
0.48366	0.63437		0.65889	0.77481
0.4679	1.88345		0.60304	2.67902
0.5235	0.32755		0.61966	0.50782
0.46991	1.28661		0.89873	0.22827
0.4575	0.66597		0.65179	0.46644
0.51862	0.72057		0.58656	0.21405
0.47234	0.41304		0.67828	0.23648
0.45058	0.36409		0.6168	2.0978
0.53555	0.91534		0.60196	2.19498
0.55794	0.46717		0.61152	3.38666
0.51588	1.03148		0.66276	0.42588
0.52191	0.30596		0.63557	3.0855
0.45733	0.49607		0.60586	0.25466
0.49438	0.67877		0.67128	0.21401
0.48147	0.77339		0.65023	0.22701
0.50989	1.11824		0.68156	0.20965
0.51802	0.59504		0.61195	0.89167
0.61889	0.79524		0.60972	0.59164
0.4766	0.52586		0.57313	0.79991
0.49046	0.2419		0.64204	0.80804
0.48938	1.18002		0.56257	2.23503
0.59828	0.97089		0.50958	0.93854
0.61643	0.2741		0.55248	5.38309
0.44454	1.01622		0.6176	0.64465
0.51144	0.3591		0.59935	3.10564
0.4629	0.23237		0.54216	0.78681
0.48774	3.43438		0.54884	0.42544
0.51113	1.59629		0.54802	1.00805
0.4996	1.62576		0.62168	0.21023
0.49255	2.09422		0.59963	0.35997
0.57342	1.23082		0.64104	0.28024
0.42098	1.23064		0.60553	0.40713
0.4989	1.82017		0.6159	2.41783
0.68458	0.21546		0.63139	0.30713
0.50141	2.24632		0.60353	1.93819
0.47823	1.16186		0.68569	0.2867
0.51996	0.27761		0.59244	0.2836
0.53193	1.84978		0.59509	1.99268
0.53223	0.29242		0.69143	1.13813
0.53363	0.32337		0.61778	1.70684
0.50565	0.82399		0.6333	0.31036
0.51032	2.95837		0.70459	1.34577
0.59094	0.31952		0.57537	0.3511
0.40831	0.33519		0.6219	2.01315
0.50472	0.3197		0.5878	2.79485
0.48619	0.45395		0.67603	0.40583
0.52457	0.2942		0.63177	0.34056
0.47779	0.55624		0.61766	0.71447
0.47389	0.50226		0.64386	0.25551
0.49507	1.06683		0.98994	0.265
0.57474	0.78956		0.93943	0.21864
0.50683	0.9479		0.92894	0.48289
0.56408	3.60615		0.96284	0.29814
0.69648	1.4447		0.96403	0.26136
0.48202	4.56055		0.94674	0.22702
0.51204	0.62987		0.95569	0.35985
0.57653	0.24347		0.92946	0.20301
0.64746	1.63696		0.92837	0.38772
0.36713	1.96764		0.9504	0.71832
0.49735	4.17948		0.94204	0.92792
0.51335	0.69239		0.96021	0.25684
0.45081	0.89762		0.93248	0.26046
0.46037	0.20978		0.94309	0.38786
0.50481	0.20214		0.90117	1.45255
0.56574	0.32863		0.95033	0.51343
0.49716	2.05644		0.59881	0.34117
0.4913	1.5536		0.70616	1.18912
0.57642	0.47916		0.60119	0.66637
0.48843	0.44618		0.58041	1.06623
0.5119	0.55727		0.50969	0.98009
0.45604	0.70588		0.62382	1.02182
0.47631	0.8228		0.62519	0.712
0.51204	0.83593		0.64037	1.11902
0.48212	2.59228		0.66384	1.0714
0.513	0.65163		0.63669	0.79002
0.50423	0.4963		0.62826	1.17001
0.55354	0.24256		0.61296	1.6202
0.56415	0.34569		0.61497	0.29249
0.44153	1.11012		0.65051	0.44286
0.47837	0.58458		0.61351	0.96259
[truncated: 13,582 more rows]

## Sheet: Fig. 2i
H41-10			H41-10R3(Cit)			Gaussian-fitting for H41-10			Gaussian-fitting for H41-10R3(Cit)			Mean Ib1/Io	Mean Ib2/Io	W1, h/2	W2, h/2	Rs
BlockDepth	Restime (ms)		BlockDepth	Restime (ms)		BlockDepth	Relative counts		BlockDepth	Relative counts		0.29951	0.34781	0.04293	0.04848	0.62163
0.58749	0.20188		0.44302	2.68707		0.005	0.00301		0.005	0.00251
0.63041	0.46586		0.54166	0.24277		0.00698	0.00301		0.00698	0.00251		K238Y
0.87444	0.20492		0.44691	0.34888		0.00797	0.00301		0.00797	0.00251
0.56858	0.29826		0.52438	0.2058		0.00896	0.00301		0.00896	0.00251
0.63779	0.39381		0.55073	0.42546		0.00995	0.00301		0.00995	0.00251
0.60591	0.32611		0.68483	0.2754		0.01095	0.00301		0.01095	0.00251
0.6175	0.38752		0.34576	1.21473		0.01194	0.00301		0.01194	0.00251
0.61387	0.20888		0.41897	0.27912		0.01293	0.00301		0.01293	0.00251
0.66032	0.22437		0.69459	0.20138		0.01392	0.00301		0.01392	0.00251
0.62449	0.28771		0.54102	0.20277		0.01491	0.00301		0.01491	0.00251
0.63663	0.32628		0.50384	0.85916		0.015	0.00301		0.015	0.00251
0.62912	0.57459		0.67042	0.27976		0.0159	0.00301		0.0159	0.00251
0.61123	0.3709		0.67168	0.24049		0.01689	0.00301		0.01689	0.00251
0.61993	0.39182		0.72167	0.25335		0.01788	0.00301		0.01788	0.00251
0.68045	0.24868		0.91584	0.25897		0.01887	0.00301		0.01887	0.00251
0.62184	0.40486		0.55013	0.60785		0.01986	0.00301		0.01986	0.00251
0.6353	0.55212		0.45354	0.26623		0.02086	0.00301		0.02086	0.00251
0.59467	0.20638		0.2804	1.0127		0.02185	0.00301		0.02185	0.00251
0.62655	0.36777		0.63499	0.21548		0.02284	0.00301		0.02284	0.00251
0.61273	0.44133		0.68237	9.08121		0.02383	0.00301		0.02383	0.00251
0.62545	0.41661		0.51051	0.21978		0.02482	0.00301		0.02482	0.00251
0.61743	0.30205		0.3283	0.36666		0.025	0.00301		0.025	0.00251
0.59518	0.33		0.45085	0.40418		0.02581	0.00301		0.02581	0.00251
0.85483	0.23526		0.71141	0.27022		0.0268	0.00301		0.0268	0.00251
0.62806	0.57405		0.73522	0.21976		0.02779	0.00301		0.02779	0.00251
0.62483	0.42805		0.66501	7.91765		0.02878	0.00301		0.02878	0.00251
0.66809	0.24483		0.67716	0.21717		0.02977	0.00301		0.02977	0.00251
0.56719	0.4061		0.60855	1.12095		0.03077	0.00301		0.03077	0.00251
0.63812	0.27224		0.66043	0.20098		0.03176	0.00301		0.03176	0.00251
0.78272	0.24447		0.36525	1.29784		0.03275	0.00301		0.03275	0.00251
0.6182	0.39304		0.61105	0.50651		0.03374	0.00301		0.03374	0.00251
0.82039	0.27922		0.68846	0.28148		0.03473	0.00301		0.03473	0.00251
0.6155	0.2988		0.44535	0.806		0.035	0.00301		0.035	0.00251
0.25791	1.02887		0.55712	0.47313		0.03572	0.00301		0.03572	0.00251
0.59707	0.3405		0.33306	2.21702		0.03671	0.00301		0.03671	0.00251
0.40666	0.55098		0.67908	0.26721		0.0377	0.00301		0.0377	0.00251
0.44542	0.44432		0.50326	1.96372		0.03869	0.00301		0.03869	0.00251
0.60191	0.35136		0.42652	0.50014		0.03968	0.00301		0.03968	0.00251
0.81761	0.53456		0.36155	1.15441		0.04068	0.00301		0.04068	0.00251
0.59713	0.3563		0.57154	0.31434		0.04167	0.00301		0.04167	0.00251
0.86636	0.6302		0.71494	0.4915		0.04266	0.00301		0.04266	0.00251
0.63914	0.20637		0.68717	0.22229		0.04365	0.00301		0.04365	0.00251
0.63684	0.50328		0.53392	0.21447		0.04464	0.00301		0.04464	0.00251
0.61403	1.00947		0.42888	4.8355		0.045	0.00301		0.045	0.00251
0.75379	0.21618		0.44987	0.50412		0.04563	0.00301		0.04563	0.00251
0.70779	0.22538		0.71377	0.25122		0.04662	0.00301		0.04662	0.00251
0.62023	0.3003		0.57534	0.44701		0.04761	0.00301		0.04761	0.00251
0.36838	0.62191		0.55418	0.51094		0.0486	0.00301		0.0486	0.00251
0.5879	0.25093		0.50254	0.71954		0.04959	0.00301		0.04959	0.00251
0.52403	0.24279		0.5327	0.21003		0.05059	0.00301		0.05059	0.00251
0.61895	0.21751		0.62453	0.44953		0.05158	0.00301		0.05158	0.00251
0.65033	0.42011		0.4907	0.93442		0.05257	0.00301		0.05257	0.00251
0.77883	0.38691		0.56441	0.21356		0.05356	0.00301		0.05356	0.00251
0.69931	0.5144		0.2775	2.98277		0.05455	0.00301		0.05455	0.00251
0.60372	0.32339		0.60739	0.21586		0.055	0.00301		0.055	0.00251
0.59572	0.38874		0.45618	2.25843		0.05554	0.00301		0.05554	0.00251
0.59327	0.20293		0.56996	0.23479		0.05653	0.00301		0.05653	0.00251
0.82943	0.6245		0.21931	0.41898		0.05752	0.00301		0.05752	0.00251
0.74839	0.34006		0.35838	0.29204		0.05851	0.00301		0.05851	0.00251
0.23005	1240.95		0.67963	0.24363		0.0595	0.00301		0.0595	0.00251
0.46897	0.72971		0.69066	0.21757		0.0605	0.00301		0.0605	0.00251
0.60246	1.66774		0.5948	1.26834		0.06149	0.00301		0.06149	0.00251
0.72973	1.40959		0.51658	0.45418		0.06248	0.00301		0.06248	0.00251
0.72553	3.2117		0.64545	0.50582		0.06347	0.00301		0.06347	0.00251
0.72915	0.96293		0.44441	0.4754		0.06446	0.00301		0.06446	0.00251
0.62623	0.54187		0.62535	0.31465		0.065	0.00301		0.065	0.00251
0.64988	0.32742		0.55282	0.86634		0.06545	0.00301		0.06545	0.00251
0.59442	0.27028		0.88786	0.25964		0.06644	0.00301		0.06644	0.00251
0.84735	0.21552		0.37407	0.32657		0.06743	0.00301		0.06743	0.00251
0.61406	0.47448		0.58377	0.6157		0.06842	0.00301		0.06842	0.00251
0.88687	0.20397		0.41509	2.8151		0.06941	0.00301		0.06941	0.00251
0.71158	0.26449		0.39417	0.30196		0.07041	0.00301		0.07041	0.00251
0.66189	0.25918		0.72291	0.66258		0.0714	0.00301		0.0714	0.00251
0.54987	0.46172		0.4947	0.92766		0.07239	0.00301		0.07239	0.00251
0.36767	0.33317		0.68853	0.24971		0.07338	0.00301		0.07338	0.00251
0.79042	0.31138		0.25913	2.05025		0.07437	0.00301		0.07437	0.00251
0.63688	1.5065		0.6819	0.42565		0.075	0.00301		0.075	0.00251
0.82271	0.77391		0.39655	0.4957		0.07536	0.00301		0.07536	0.00251
0.89136	0.21646		0.6495	0.2985		0.07635	0.00301		0.07635	0.00251
0.58824	1.90655		0.504	0.32682		0.07734	0.00301		0.07734	0.00251
0.8658	2.9259		0.43483	2.79894		0.07833	0.00301		0.07833	0.00251
0.83008	0.21969		0.66817	0.27037		0.07932	0.00301		0.07932	0.00251
0.83187	0.81359		0.54009	1.5265		0.08032	0.00301		0.08032	0.00251
0.88543	0.459		0.67119	0.266		0.08131	0.00301		0.08131	0.00251
0.82636	0.49606		0.33421	3.78862		0.0823	0.00301		0.0823	0.00251
0.77969	1.03105		0.38779	3.9156		0.08329	0.00301		0.08329	0.00251
0.8283	0.20387		0.26878	0.54026		0.08428	0.00301		0.08428	0.00251
0.71908	26.9967		0.47259	0.39497		0.085	0.00301		0.085	0.00251
0.66883	0.63693		0.62505	0.33252		0.08527	0.00301		0.08527	0.00251
0.8442	0.21259		0.56089	0.53596		0.08626	0.00301		0.08626	0.00251
0.85203	0.23447		0.47774	0.86811		0.08725	0.00301		0.08725	0.00251
0.70961	0.32755		0.75629	0.53166		0.08824	0.00301		0.08824	0.00251
0.77534	0.44392		0.73312	0.31662		0.08923	0.00301		0.08923	0.00251
0.56883	0.2856		0.55948	0.27415		0.09023	0.00301		0.09023	0.00251
0.7967	3.85282		0.63838	0.2272		0.09122	0.00301		0.09122	0.00251
0.67663	0.22085		0.57288	0.43074		0.09221	0.00301		0.09221	0.00251
0.52314	0.22789		0.54754	0.41812		0.0932	0.00301		0.0932	0.00251
0.72614	0.32484		0.354	0.66519		0.09419	0.00301		0.09419	0.00251
0.17906	0.22278		0.3386	0.58662		0.095	0.00301		0.095	0.00251
0.72813	9.93458		0.10989	15.1392		0.09518	0.00301		0.09518	0.00251
0.68468	0.58316		0.39047	2.5173		0.09617	0.00301		0.09617	0.00251
0.608	0.20006		0.64176	0.6574		0.09716	0.00301		0.09716	0.00251
0.75465	0.46106		0.67701	0.24153		0.09815	0.00301		0.09815	0.00251
0.71519	2.6815		0.46266	0.48207		0.09914	0.00301		0.09914	0.00251
0.90213	0.45275		0.63284	0.25047		0.10014	0.00301		0.10014	0.00251
0.9814	0.71617		0.36424	1.30618		0.10113	0.00301		0.10113	0.00251
0.56243	0.21127		0.64475	0.22534		0.10212	0.00301		0.10212	0.00251
0.79682	0.22704		0.63969	0.68819		0.10311	0.00301		0.10311	0.00251
0.85891	0.64412		0.47369	0.39489		0.1041	0.00301		0.1041	0.00251
0.63765	0.58616		0.35884	0.23788		0.105	0.00301		0.105	0.00251
0.70936	0.54968		0.43193	0.53963		0.10509	0.00301		0.10509	0.00251
0.87013	0.21991		0.64876	0.27495		0.10608	0.00301		0.10608	0.00251
0.85652	0.30285		0.50671	0.31802		0.10707	0.00301		0.10707	0.00251
0.8743	0.35099		0.70343	0.43509		0.10806	0.00301		0.10806	0.00251
0.39852	0.29559		0.6937	0.3107		0.10905	0.00301		0.10905	0.00251
0.52436	0.30303		0.61527	0.85476		0.11005	0.00301		0.11005	0.00251
0.82722	0.90031		0.70385	0.21399		0.11104	0.00301		0.11104	0.00251
0.82285	0.42709		0.32846	0.23072		0.11203	0.00301		0.11203	0.00251
0.71912	0.88718		0.62833	0.48964		0.11302	0.00301		0.11302	0.00251
0.85975	0.21938		0.31654	0.51585		0.11401	0.00301		0.11401	0.00251
0.88123	0.25275		0.35462	2.64663		0.115	0.00301		0.115	0.00251
0.87312	0.21478		0.45445	0.25563		0.115	0.00301		0.115	0.00251
0.68981	0.25186		0.64591	0.33889		0.11599	0.00301		0.11599	0.00251
0.83952	0.30147		0.34109	0.3898		0.11698	0.00301		0.11698	0.00251
0.86806	0.22513		0.33962	0.39209		0.11797	0.00301		0.11797	0.00251
0.37857	2.73828		0.35001	0.57021		0.11896	0.00301		0.11896	0.00251
0.87215	0.20607		0.59605	0.21167		0.11995	0.00301		0.11995	0.00251
0.79374	7.05702		0.49123	0.26376		0.12095	0.00301		0.12095	0.00251
0.81901	1.66448		0.38462	0.41425		0.12194	0.00301		0.12194	0.00251
0.70029	0.31057		0.71489	0.23641		0.12293	0.00301		0.12293	0.00251
0.82321	0.25555		0.6289	0.37194		0.12392	0.00301		0.12392	0.00251
0.87055	0.43927		0.31545	0.90189		0.12491	0.00301		0.12491	0.00251
0.8275	0.34813		0.38314	0.35932		0.125	0.00301		0.125	0.00251
0.88258	10.4062		0.59429	1.39195		0.1259	0.00301		0.1259	0.00251
0.13346	2.68243		0.65518	0.29813		0.12689	0.00301		0.12689	0.00251
0.77108	11.3394		0.36165	1.96217		0.12788	0.00301		0.12788	0.00251
0.75058	0.46461		0.64877	0.20935		0.12887	0.00301		0.12887	0.00251
0.86597	0.23717		0.25858	0.29074		0.12986	0.00301		0.12986	0.00251
0.75644	2.05109		0.36512	0.7388		0.13086	0.00301		0.13086	0.00251
0.75104	5.4022		0.42982	0.56483		0.13185	0.00301		0.13185	0.00251
0.65995	0.24602		0.33379	0.66613		0.13284	0.00301		0.13284	0.00251
0.79784	0.95559		0.59781	0.30726		0.13383	0.00301		0.13383	0.00251
0.77002	2.36129		0.57476	0.51027		0.13482	0.00301		0.13482	0.00251
0.78439	0.38461		0.5264	0.98314		0.135	0.00301		0.135	0.00251
0.69553	21.6283		0.32046	1.18111		0.13581	0.00301		0.13581	0.00251
0.84317	0.61126		0.33271	1.83734		0.1368	0.00301		0.1368	0.00251
0.80491	31.7588		0.56969	0.58347		0.13779	0.00301		0.13779	0.00251
0.87822	0.2013		0.58696	4.29381		0.13878	0.00301		0.13878	0.00251
0.68628	0.20408		0.26774	3.17124		0.13977	0.00301		0.13977	0.00251
0.82451	0.20511		0.33797	0.82686		0.14077	0.00301		0.14077	0.00251
0.71747	0.27648		0.65495	0.22756		0.14176	0.00301		0.14176	0.00251
0.72001	0.25469		0.62904	0.45357		0.14275	0.00301		0.14275	0.00251
0.78956	0.84774		0.6398	0.59614		0.14374	0.00301		0.14374	0.00251
0.80846	13.8971		0.34851	1.30207		0.14473	0.00301		0.14473	0.00251
0.81245	2.14185		0.50319	0.70186		0.145	0.00301		0.145	0.00251
0.55884	0.20325		0.46332	0.65391		0.14572	0.00301		0.14572	0.00251
0.73814	0.25867		0.41619	0.50369		0.14671	0.00301		0.14671	0.00251
0.83424	0.59786		0.34553	0.85016		0.1477	0.00301		0.1477	0.00251
0.66781	0.2503		0.36526	0.79858		0.14869	0.00301		0.14869	0.00251
0.71857	0.44489		0.66685	0.52097		0.14968	0.00301		0.14968	0.00251
0.776	0.30417		0.70641	0.21925		0.15068	0.00301		0.15068	0.00251
0.0757	0.22354		0.63309	0.52664		0.15167	0.00301		0.15167	0.00251
0.68141	1.87881		0.55159	0.23034		0.15266	0.00301		0.15266	0.00251
0.83081	0.86225		0.37847	1.02611		0.15365	0.00301		0.15365	0.00251
0.5519	0.26276		0.41605	0.25454		0.15464	0.00301		0.15464	0.00251
0.78253	0.59205		0.48396	0.58438		0.155	0.00301		0.155	0.00251
0.76414	0.62173		0.60879	0.48522		0.15563	0.00301		0.15563	0.00251
0.86127	0.22805		0.52735	1.25016		0.15662	0.00301		0.15662	0.00251
0.77504	2.58077		0.38433	1.36223		0.15761	0.00301		0.15761	0.00251
0.80924	0.20851		0.30345	0.27898		0.1586	0.00301		0.1586	0.00251
0.83607	0.21407		0.70991	0.37129		0.15959	0.00301		0.15959	0.00251
0.70131	0.5629		0.36827	1.02201		0.16059	0.00301		0.16059	0.00251
0.78438	0.26801		0.32951	0.24286		0.16158	0.00301		0.16158	0.00251
0.79276	0.74396		0.36778	0.71801		0.16257	0.00301		0.16257	0.00251
0.63707	0.20217		0.36509	0.31674		0.16356	0.00301		0.16356	0.00251
0.55791	60.169		0.31618	0.7528		0.16455	0.00301		0.16455	0.00251
0.72602	0.37074		0.37628	0.39492		0.165	0.00301		0.165	0.00251
0.77234	127.083		0.35256	0.38075		0.16554	0.00301		0.16554	0.00251
0.85813	0.97904		0.34131	1.15183		0.16653	0.00301		0.16653	0.00251
0.84976	0.21538		0.33671	2.59997		0.16752	0.00301		0.16752	0.00251
0.76061	1.4899		0.32824	0.33932		0.16851	0.00301		0.16851	0.00251
0.7752	0.23298		0.35632	2.63414		0.1695	0.00301		0.1695	0.00251
0.66249	0.20327		0.4429	0.40184		0.1705	0.00301		0.1705	0.00251
0.06025	0.54061		0.32911	0.93408		0.17149	0.00301		0.17149	0.00251
0.79398	5.91819		0.60961	0.95163		0.17248	0.00301		0.17248	0.00251
0.73086	0.21541		0.68399	0.37251		0.17347	0.00301		0.17347	0.00251
0.76875	4.01522		0.35232	0.70186		0.17446	0.00301		0.17446	0.00251
0.66759	0.20535		0.61622	0.33383		0.175	0.00301		0.175	0.00251
0.95054	0.21663		0.52137	0.61998		0.17545	0.00301		0.17545	0.00251
0.71941	0.78015		0.45172	0.35296		0.17644	0.00301		0.17644	0.00251
0.85609	0.59905		0.32821	0.87496		0.17743	0.00301		0.17743	0.00251
0.62582	0.44447		0.31647	0.59504		0.17842	0.00301		0.17842	0.00251
0.82522	0.26856		0.31649	0.21895		0.17941	0.00301		0.17941	0.00251
0.8447	0.57524		0.68245	0.22519		0.18041	0.00301		0.18041	0.00251
0.82508	0.76188		0.35833	0.29114		0.1814	0.00301		0.1814	0.00251
0.71144	1.80065		0.28416	10.6834		0.18239	0.00301		0.18239	0.00251
0.6998	0.20032		0.42525	0.3782		0.18338	0.00301		0.18338	0.00251
0.81661	0.69965		0.43769	1.56759		0.18437	0.00301		0.18437	0.00251
0.74489	0.26049		0.36392	0.68646		0.185	0.00301		0.185	0.00251
0.84257	0.65706		0.40288	0.44793		0.18536	0.00301		0.18536	0.00251
0.29646	0.23294		0.34165	0.59158		0.18635	0.00301		0.18635	0.00251
0.71516	0.26765		0.35936	0.77013		0.18734	0.00301		0.18734	0.00251
0.56218	0.20699		0.3573	1.16194		0.18833	0.00301		0.18833	0.00251
0.78025	0.43827		0.67575	0.45009		0.18932	0.00301		0.18932	0.00251
0.72151	2.60735		0.68426	0.23251		0.19032	0.00301		0.19032	0.00251
0.85837	0.274		0.24759	0.59104		0.19131	0.00301		0.19131	0.00251
0.73032	1.64397		0.64575	0.30993		0.1923	0.00301		0.1923	0.00251
0.60282	0.39955		0.36174	1.35841		0.19329	0.00301		0.19329	0.00251
0.36592	0.27759		0.51987	0.34163		0.19428	0.00301		0.19428	0.00251
0.65628	4.02895		0.1585	0.65477		0.195	0.00301		0.195	0.00251
0.81995	0.62442		0.42051	1.30329		0.19527	0.00301		0.19527	0.00251
0.7834	0.69314		0.0886	0.26751		0.19626	0.00301		0.19626	0.00251
0.85835	0.21161		0.33002	0.4805		0.19725	0.00301		0.19725	0.00251
0.8024	0.95514		0.60099	0.31862		0.19824	0.00301		0.19824	0.00251
0.69949	0.61356		0.25885	0.92456		0.19923	0.00301		0.19923	0.00251
0.73187	0.22076		0.32306	0.21403		0.20023	0.00301		0.20023	0.00251
0.80067	1.4212		0.35108	1.35186		0.20122	0.00301		0.20122	0.00251
0.74428	0.28193		0.35606	0.24303		0.20221	0.00301		0.20221	0.00251
0.66933	0.20732		0.37331	0.49373		0.2032	0.00301		0.2032	0.00251
0.76524	0.92109		0.50795	0.79118		0.20419	0.00301		0.20419	0.00251
0.75619	0.71531		0.60744	0.20392		0.205	0.00301		0.205	0.00251
0.85056	0.20235		0.62143	1.20885		0.20518	0.00301		0.20518	0.00251
0.84899	0.24564		0.35362	1.21729		0.20617	0.00301		0.20617	0.00251
0.54742	0.29595		0.40229	0.35721		0.20716	0.00301		0.20716	0.00251
0.63193	0.83981		0.34948	0.42054		0.20815	0.00301		0.20815	0.00251
0.63826	0.39679		0.36153	0.76806		0.20914	0.00301		0.20914	0.00251
0.64894	0.22695		0.33062	0.68504		0.21014	0.00301		0.21014	0.00251
0.6136	0.30695		0.38521	0.30985		0.21113	0.00301		0.21113	0.00251
0.62865	0.47088		0.33242	2.81769		0.21212	0.00301		0.21212	0.00251
0.62195	0.2106		0.43656	0.51236		0.21311	0.00301		0.21311	0.00251
0.57084	0.44402		0.34684	1.46942		0.2141	0.00301		0.2141	0.00251
0.64887	0.36436		0.67867	0.32962		0.215	0.00302		0.215	0.00251
0.64728	0.25489		0.37322	0.90467		0.21509	0.00302		0.21509	0.00251
0.6303	0.37159		0.37778	0.29814		0.21608	0.00302		0.21608	0.00251
0.61878	0.31655		0.64594	0.31733		0.21707	0.00302		0.21707	0.00251
0.61313	0.38371		0.52421	0.23129		0.21806	0.00302		0.21806	0.00251
0.60908	0.21882		0.33948	0.66768		0.21905	0.00302		0.21905	0.00251
0.62312	0.79705		0.34357	0.8275		0.22005	0.00302		0.22005	0.00251
0.6473	0.27907		0.32846	0.757		0.22104	0.00303		0.22104	0.00251
0.63635	0.23399		0.3638	0.25445		0.22203	0.00303		0.22203	0.00251
0.62197	0.55357		0.59667	0.20821		0.22302	0.00304		0.22302	0.00251
0.61158	0.24868		0.50541	0.31213		0.22401	0.00304		0.22401	0.00251
0.78875	0.49198		0.39107	0.38744		0.225	0.00305		0.225	0.00251
0.63261	0.2399		0.59109	1.23852		0.225	0.00305		0.225	0.00251
0.62479	0.6572		0.37285	0.49046		0.22599	0.00306		0.22599	0.00251
0.51369	1.22837		0.34176	0.34106		0.22698	0.00307		0.22698	0.00251
0.48814	0.45896		0.36105	0.76332		0.22797	0.00308		0.22797	0.00251
0.80686	0.30114		0.48329	0.62288		0.22896	0.0031		0.22896	0.00251
0.65112	0.37409		0.31309	0.33585		0.22995	0.00312		0.22995	0.00251
0.62275	0.33519		0.66074	0.25803		0.23095	0.00314		0.23095	0.00251
0.60131	0.24134		0.34636	1.01077		0.23194	0.00317		0.23194	0.00251
0.61557	0.26779		0.63046	0.26579		0.23293	0.00321		0.23293	0.00251
0.64857	0.49265		0.39004	0.21871		0.23392	0.00325		0.23392	0.00251
0.61624	0.39602		0.33303	1.0412		0.23491	0.0033		0.23491	0.00251
0.55454	0.22692		0.3514	1.29805		0.235	0.0033		0.235	0.00251
0.83025	0.25864		0.32627	2.00986		0.2359	0.00336		0.2359	0.00251
0.61164	0.3538		0.33054	0.85994		0.23689	0.00343		0.23689	0.00251
0.61248	0.32706		0.67477	0.39947		0.23788	0.00352		0.23788	0.00251
0.62604	0.36086		0.33622	0.56857		0.23887	0.00362		0.23887	0.00251
0.60411	0.20686		0.34834	1.43118		0.23986	0.00374		0.23986	0.00251
0.64554	0.23036		0.59783	0.22532		0.24086	0.00388		0.24086	0.00251
0.62804	0.21165		0.35574	0.22721		0.24185	0.00404		0.24185	0.00251
0.65752	0.47652		0.38443	0.37449		0.24284	0.00423		0.24284	0.00251
0.66553	0.21718		0.35217	0.37916		0.24383	0.00445		0.24383	0.00251
0.58198	0.36464		0.36808	0.34677		0.24482	0.00471		0.24482	0.00251
0.6185	0.31442		0.3262	0.94462		0.245	0.00476		0.245	0.00251
0.62024	0.22413		0.30954	0.5543		0.24581	0.00501		0.24581	0.00251
[truncated: 10,649 more rows]

## Sheet: Fig. 2j
H41-10			H41-10R3(Cit)			Gaussian-fitting for H41-10			Gaussian-fitting for H41-10R3(Cit)			Mean Ib1/Io	Mean Ib2/Io	W1, h/2	W2, h/2	Rs
[truncated: 12,106 more rows]

[truncated: 6 more sheets: Fig. 2k, Fig. 2o, Fig. 2q, Fig. 2r, Fig. 2s, Fig. 2t]
