# Supplementary material
Source: Research Square preprint supplement (doi:10.21203/rs.3.rs-9607376/v1)
Supplement: Supplementary file 6 [file d47728069f81c86441aa9cdf.xlsx]

## Sheet: Fig. 6b
Scatter			Peak Fitting 1			Peak Fitting 2
BlockDepth	Restime (ms)		BlockDepth	Relative counts		BlockDepth	Relative counts
0.70417	0.14635		0.0025	0.00267		0.0025	0.00267
0.63977	0.23691		0.00449	0.00267		0.00449	0.00267
0.723	0.10524		0.00549	0.00267		0.00549	0.00267
0.76521	0.08377		0.00648	0.00267		0.00648	0.00267
0.76661	0.13457		0.00748	0.00267		0.00748	0.00267
0.79397	0.08627		0.0075	0.00267		0.0075	0.00267
0.6199	0.14104		0.00848	0.00267		0.00848	0.00267
0.7056	0.10283		0.00947	0.00267		0.00947	0.00267
0.73721	0.0931		0.01047	0.00267		0.01047	0.00267
0.76138	0.0723		0.01146	0.00267		0.01146	0.00267
0.79957	0.05324		0.01246	0.00267		0.01246	0.00267
0.68169	0.20469		0.0125	0.00267		0.0125	0.00267
0.69825	0.08316		0.01346	0.00267		0.01346	0.00267
0.71419	0.10593		0.01445	0.00267		0.01445	0.00267
0.30825	0.07932		0.01545	0.00267		0.01545	0.00267
0.44236	0.155		0.01644	0.00267		0.01644	0.00267
0.6881	0.10699		0.01744	0.00267		0.01744	0.00267
0.78433	0.07745		0.0175	0.00267		0.0175	0.00267
0.71886	0.1214		0.01844	0.00267		0.01844	0.00267
0.68598	0.11887		0.01943	0.00267		0.01943	0.00267
0.76521	0.08145		0.02043	0.00267		0.02043	0.00267
0.81751	0.08812		0.02142	0.00267		0.02142	0.00267
0.74776	0.0855		0.02242	0.00267		0.02242	0.00267
0.68154	0.12821		0.0225	0.00267		0.0225	0.00267
0.74391	0.10661		0.02342	0.00267		0.02342	0.00267
0.62099	0.16524		0.02441	0.00267		0.02441	0.00267
0.66563	0.16093		0.02541	0.00267		0.02541	0.00267
0.79989	0.09089		0.0264	0.00267		0.0264	0.00267
0.69888	0.09494		0.0274	0.00267		0.0274	0.00267
0.70231	0.12352		0.0275	0.00267		0.0275	0.00267
0.66932	0.17299		0.0284	0.00267		0.0284	0.00267
0.6323	0.23102		0.02939	0.00267		0.02939	0.00267
0.6264	0.21045		0.03039	0.00267		0.03039	0.00267
0.33674	0.19749		0.03138	0.00267		0.03138	0.00267
0.79788	0.05346		0.03238	0.00267		0.03238	0.00267
0.54838	0.10545		0.0325	0.00267		0.0325	0.00267
0.70281	0.11914		0.03338	0.00267		0.03338	0.00267
0.59902	0.34092		0.03437	0.00267		0.03437	0.00267
0.74146	0.1504		0.03537	0.00267		0.03537	0.00267
0.50389	1.40572		0.03636	0.00267		0.03636	0.00267
0.68033	0.11904		0.03736	0.00267		0.03736	0.00267
0.72765	0.08703		0.0375	0.00267		0.0375	0.00267
0.69076	0.13519		0.03836	0.00267		0.03836	0.00267
0.76673	0.0843		0.03935	0.00267		0.03935	0.00267
0.78033	0.06409		0.04035	0.00267		0.04035	0.00267
0.43877	1.93695		0.04134	0.00267		0.04134	0.00267
0.75247	0.0822		0.04234	0.00267		0.04234	0.00267
0.6019	0.31028		0.0425	0.00267		0.0425	0.00267
0.55655	0.09823		0.04334	0.00267		0.04334	0.00267
0.72141	0.08976		0.04433	0.00267		0.04433	0.00267
0.43421	0.11852		0.04533	0.00267		0.04533	0.00267
0.71811	0.10283		0.04632	0.00267		0.04632	0.00267
0.73431	0.07734		0.04732	0.00267		0.04732	0.00267
0.77955	0.082		0.0475	0.00267		0.0475	0.00267
0.7628	0.09113		0.04832	0.00267		0.04832	0.00267
0.76988	0.13347		0.04931	0.00267		0.04931	0.00267
0.866	0.10404		0.05031	0.00267		0.05031	0.00267
0.72193	0.1471		0.0513	0.00267		0.0513	0.00267
0.76282	0.13061		0.0523	0.00267		0.0523	0.00267
0.63643	0.267		0.0525	0.00267		0.0525	0.00267
0.58426	0.23072		0.0533	0.00267		0.0533	0.00267
0.50581	2.47072		0.05429	0.00267		0.05429	0.00267
0.79968	0.10531		0.05529	0.00267		0.05529	0.00267
0.5998	0.38908		0.05628	0.00267		0.05628	0.00267
0.80038	0.07378		0.05728	0.00267		0.05728	0.00267
0.76826	0.08038		0.0575	0.00267		0.0575	0.00267
0.71322	0.14394		0.05828	0.00267		0.05828	0.00267
0.79941	0.07373		0.05927	0.00267		0.05927	0.00267
0.45979	0.09788		0.06027	0.00267		0.06027	0.00267
0.49368	2.15966		0.06126	0.00267		0.06126	0.00267
0.73031	0.10631		0.06226	0.00267		0.06226	0.00267
0.66797	0.09153		0.0625	0.00267		0.0625	0.00267
0.50383	2.5361		0.06326	0.00267		0.06326	0.00267
0.77639	0.07618		0.06425	0.00267		0.06425	0.00267
0.73518	0.08345		0.06525	0.00267		0.06525	0.00267
0.44702	0.42351		0.06624	0.00267		0.06624	0.00267
0.55555	0.24814		0.06724	0.00267		0.06724	0.00267
0.69848	0.10768		0.0675	0.00267		0.0675	0.00267
0.63621	0.09451		0.06824	0.00267		0.06824	0.00267
0.63517	0.17774		0.06923	0.00267		0.06923	0.00267
0.72935	0.10911		0.07023	0.00267		0.07023	0.00267
0.67599	0.14153		0.07122	0.00267		0.07122	0.00267
0.47651	0.12212		0.07222	0.00267		0.07222	0.00267
0.51718	0.2466		0.0725	0.00267		0.0725	0.00267
0.64043	0.50483		0.07322	0.00267		0.07322	0.00267
0.76708	0.09418		0.07421	0.00267		0.07421	0.00267
0.74622	0.08308		0.07521	0.00267		0.07521	0.00267
0.50052	0.50029		0.0762	0.00267		0.0762	0.00267
0.45309	0.54212		0.0772	0.00267		0.0772	0.00267
0.64256	0.12679		0.0775	0.00267		0.0775	0.00267
0.61534	0.10101		0.0782	0.00267		0.0782	0.00267
0.64001	0.55233		0.07919	0.00267		0.07919	0.00267
0.75643	0.07622		0.08019	0.00267		0.08019	0.00267
0.63131	0.36219		0.08118	0.00267		0.08118	0.00267
0.6814	0.14196		0.08218	0.00267		0.08218	0.00267
0.67648	0.15908		0.0825	0.00267		0.0825	0.00267
0.62001	0.17838		0.08318	0.00267		0.08318	0.00267
0.64743	0.17013		0.08417	0.00267		0.08417	0.00267
0.7034	0.33058		0.08517	0.00267		0.08517	0.00267
0.75504	0.09269		0.08616	0.00267		0.08616	0.00267
0.51121	0.13053		0.08716	0.00267		0.08716	0.00267
0.4982	0.83553		0.0875	0.00267		0.0875	0.00267
0.45782	0.11877		0.08816	0.00267		0.08816	0.00267
0.64987	0.36999		0.08915	0.00267		0.08915	0.00267
0.58506	0.24769		0.09015	0.00267		0.09015	0.00267
0.80776	0.06526		0.09114	0.00267		0.09114	0.00267
0.69207	0.15502		0.09214	0.00267		0.09214	0.00267
0.44698	1.00758		0.0925	0.00267		0.0925	0.00267
0.59314	0.56258		0.09314	0.00267		0.09314	0.00267
0.71139	0.11201		0.09413	0.00267		0.09413	0.00267
0.82707	0.09345		0.09513	0.00267		0.09513	0.00267
0.64838	0.11535		0.09612	0.00267		0.09612	0.00267
0.54705	0.13412		0.09712	0.00267		0.09712	0.00267
0.43087	0.13737		0.0975	0.00267		0.0975	0.00267
0.77119	0.08833		0.09812	0.00267		0.09812	0.00267
0.61362	0.17101		0.09911	0.00267		0.09911	0.00267
0.79661	0.05694		0.10011	0.00267		0.10011	0.00267
0.66865	0.10795		0.1011	0.00267		0.1011	0.00267
0.77441	0.11168		0.1021	0.00267		0.1021	0.00267
0.70718	0.12377		0.1025	0.00267		0.1025	0.00267
0.69917	0.17129		0.1031	0.00267		0.1031	0.00267
0.48965	3.52696		0.10409	0.00267		0.10409	0.00267
0.72044	0.08221		0.10509	0.00267		0.10509	0.00267
0.74488	0.08898		0.10608	0.00267		0.10608	0.00267
0.71766	0.12418		0.10708	0.00267		0.10708	0.00267
0.7686	0.07532		0.1075	0.00267		0.1075	0.00267
0.65101	0.10659		0.10808	0.00267		0.10808	0.00267
0.78034	0.08545		0.10907	0.00267		0.10907	0.00267
0.70068	0.11478		0.11007	0.00267		0.11007	0.00267
0.682	0.08662		0.11106	0.00267		0.11106	0.00267
0.7009	0.21899		0.11206	0.00267		0.11206	0.00267
0.68983	0.14528		0.1125	0.00267		0.1125	0.00267
0.80297	0.10382		0.11306	0.00267		0.11306	0.00267
0.60789	0.14312		0.11405	0.00267		0.11405	0.00267
0.4994	3.05788		0.11505	0.00267		0.11505	0.00267
0.44322	0.16664		0.11604	0.00267		0.11604	0.00267
0.66151	0.15919		0.11704	0.00267		0.11704	0.00267
0.72888	0.11564		0.1175	0.00267		0.1175	0.00267
0.4977	1.39567		0.11804	0.00267		0.11804	0.00267
0.92847	0.15099		0.11903	0.00267		0.11903	0.00267
0.59372	0.10251		0.12003	0.00267		0.12003	0.00267
0.4959	0.93217		0.12102	0.00267		0.12102	0.00267
0.63841	0.17277		0.12202	0.00267		0.12202	0.00267
0.45828	0.29054		0.1225	0.00267		0.1225	0.00267
0.56299	0.16232		0.12302	0.00267		0.12302	0.00267
0.55549	0.20404		0.12401	0.00267		0.12401	0.00267
0.75966	0.08449		0.12501	0.00267		0.12501	0.00267
0.70472	0.09397		0.126	0.00267		0.126	0.00267
0.75304	0.05815		0.127	0.00267		0.127	0.00267
0.72771	0.10208		0.1275	0.00267		0.1275	0.00267
0.69716	0.14576		0.128	0.00267		0.128	0.00267
0.53694	0.37095		0.12899	0.00267		0.12899	0.00267
0.81483	0.07656		0.12999	0.00267		0.12999	0.00267
0.74544	0.0772		0.13098	0.00267		0.13098	0.00267
0.2564	0.1504		0.13198	0.00267		0.13198	0.00267
0.46049	1.09748		0.1325	0.00267		0.1325	0.00267
0.65529	0.29418		0.13298	0.00267		0.13298	0.00267
0.62026	0.10553		0.13397	0.00267		0.13397	0.00267
0.72009	0.17322		0.13497	0.00267		0.13497	0.00267
0.662	0.12257		0.13596	0.00267		0.13596	0.00267
0.49222	0.34568		0.13696	0.00267		0.13696	0.00267
0.51991	0.24381		0.1375	0.00267		0.1375	0.00267
0.68556	0.09274		0.13796	0.00267		0.13796	0.00267
0.44191	1.16705		0.13895	0.00267		0.13895	0.00267
0.64915	0.13301		0.13995	0.00267		0.13995	0.00267
0.57244	0.10274		0.14094	0.00267		0.14094	0.00267
0.57287	0.10311		0.14194	0.00267		0.14194	0.00267
0.73204	0.07668		0.1425	0.00267		0.1425	0.00267
0.72837	0.11657		0.14294	0.00267		0.14294	0.00267
0.46086	1.02408		0.14393	0.00267		0.14393	0.00267
0.69389	0.08746		0.14493	0.00267		0.14493	0.00267
0.55229	0.59954		0.14592	0.00267		0.14592	0.00267
0.61816	0.09959		0.14692	0.00267		0.14692	0.00267
0.80109	0.05918		0.1475	0.00267		0.1475	0.00267
0.63029	0.13319		0.14792	0.00267		0.14792	0.00267
0.66661	0.19776		0.14891	0.00267		0.14891	0.00267
0.5007	3.78689		0.14991	0.00267		0.14991	0.00267
0.77927	0.07493		0.1509	0.00267		0.1509	0.00267
0.49253	1.42298		0.1519	0.00267		0.1519	0.00267
0.73357	0.09024		0.1525	0.00267		0.1525	0.00267
0.50214	0.25479		0.1529	0.00267		0.1529	0.00267
0.50653	1.39196		0.15389	0.00267		0.15389	0.00267
0.80136	0.06527		0.15489	0.00267		0.15489	0.00267
0.56132	0.18264		0.15588	0.00267		0.15588	0.00267
0.77977	0.10079		0.15688	0.00267		0.15688	0.00267
0.75042	0.07134		0.1575	0.00267		0.1575	0.00267
0.65541	0.09598		0.15788	0.00267		0.15788	0.00267
0.51241	0.59558		0.15887	0.00267		0.15887	0.00267
0.71879	0.12131		0.15987	0.00267		0.15987	0.00267
0.65942	0.0855		0.16086	0.00267		0.16086	0.00267
0.71911	0.1408		0.16186	0.00267		0.16186	0.00267
0.77594	0.08199		0.1625	0.00267		0.1625	0.00267
0.70169	0.11879		0.16286	0.00267		0.16286	0.00267
0.45569	0.38178		0.16385	0.00267		0.16385	0.00267
0.46184	0.43404		0.16485	0.00267		0.16485	0.00267
0.45034	0.69183		0.16584	0.00267		0.16584	0.00267
0.49903	1.70386		0.16684	0.00267		0.16684	0.00267
0.56417	0.10138		0.1675	0.00267		0.1675	0.00267
0.79925	0.0991		0.16784	0.00267		0.16784	0.00267
0.77614	0.07998		0.16883	0.00267		0.16883	0.00267
0.49439	0.6494		0.16983	0.00267		0.16983	0.00267
0.50614	2.17422		0.17082	0.00267		0.17082	0.00267
0.78871	0.06077		0.17182	0.00267		0.17182	0.00267
0.73935	0.20371		0.1725	0.00267		0.1725	0.00267
0.50037	1.3913		0.17282	0.00267		0.17282	0.00267
0.64857	0.16701		0.17381	0.00267		0.17381	0.00267
0.68334	0.09358		0.17481	0.00267		0.17481	0.00267
0.64672	0.10699		0.1758	0.00267		0.1758	0.00267
0.78061	0.10441		0.1768	0.00267		0.1768	0.00267
0.75931	0.10815		0.1775	0.00267		0.1775	0.00267
0.67718	0.08765		0.1778	0.00267		0.1778	0.00267
0.72488	0.08189		0.17879	0.00267		0.17879	0.00267
0.73327	0.09774		0.17979	0.00267		0.17979	0.00267
0.75647	0.09494		0.18078	0.00267		0.18078	0.00267
0.50077	1.18368		0.18178	0.00267		0.18178	0.00267
0.50756	0.56874		0.1825	0.00267		0.1825	0.00267
0.78614	0.07914		0.18278	0.00267		0.18278	0.00267
0.65989	0.15524		0.18377	0.00267		0.18377	0.00267
0.48936	0.78685		0.18477	0.00267		0.18477	0.00267
0.67279	0.09481		0.18576	0.00267		0.18576	0.00267
0.49696	1.85251		0.18676	0.00267		0.18676	0.00267
0.70264	0.11577		0.1875	0.00267		0.1875	0.00267
0.50446	1.20351		0.18776	0.00267		0.18776	0.00267
0.77269	0.2433		0.18875	0.00267		0.18875	0.00267
0.49266	0.1259		0.18975	0.00267		0.18975	0.00267
0.49598	1.11132		0.19074	0.00267		0.19074	0.00267
0.64785	0.1147		0.19174	0.00267		0.19174	0.00267
0.52673	0.56506		0.1925	0.00267		0.1925	0.00267
0.50211	2.85856		0.19274	0.00267		0.19274	0.00267
0.66056	0.18206		0.19373	0.00267		0.19373	0.00267
0.73674	0.11068		0.19473	0.00267		0.19473	0.00267
0.54995	0.75878		0.19572	0.00267		0.19572	0.00267
0.49574	1.44736		0.19672	0.00267		0.19672	0.00267
0.61061	0.31001		0.1975	0.00267		0.1975	0.00267
0.59273	0.3195		0.19772	0.00267		0.19772	0.00267
0.6235	0.2164		0.19871	0.00267		0.19871	0.00267
0.60852	0.16604		0.19971	0.00267		0.19971	0.00267
0.67118	0.17772		0.2007	0.00267		0.2007	0.00267
0.57661	0.2355		0.2017	0.00267		0.2017	0.00267
0.77822	0.12093		0.2025	0.00267		0.2025	0.00267
0.74987	0.07923		0.2027	0.00267		0.2027	0.00267
0.39378	0.13816		0.20369	0.00267		0.20369	0.00267
0.73821	0.07484		0.20469	0.00267		0.20469	0.00267
0.68029	0.14166		0.20568	0.00267		0.20568	0.00267
0.69348	0.09549		0.20668	0.00267		0.20668	0.00267
0.77834	0.06545		0.2075	0.00267		0.2075	0.00267
0.76171	0.12401		0.20768	0.00267		0.20768	0.00267
0.60207	0.18557		0.20867	0.00267		0.20867	0.00267
0.72407	0.10628		0.20967	0.00267		0.20967	0.00267
0.75211	0.11352		0.21066	0.00267		0.21066	0.00267
0.50178	0.63896		0.21166	0.00267		0.21166	0.00267
0.45872	0.14499		0.2125	0.00267		0.2125	0.00267
0.43517	0.44672		0.21266	0.00267		0.21266	0.00267
0.66659	0.09933		0.21365	0.00267		0.21365	0.00267
0.65964	0.12629		0.21465	0.00267		0.21465	0.00267
0.74114	0.08725		0.21564	0.00267		0.21564	0.00267
0.50523	0.56281		0.21664	0.00267		0.21664	0.00267
0.49744	2.59316		0.2175	0.00267		0.2175	0.00267
0.68883	0.12014		0.21764	0.00267		0.21764	0.00267
0.80747	0.07728		0.21863	0.00267		0.21863	0.00267
0.61945	0.09409		0.21963	0.00267		0.21963	0.00267
0.55126	0.18136		0.22062	0.00267		0.22062	0.00267
0.71264	0.14558		0.22162	0.00267		0.22162	0.00267
0.65764	0.11435		0.2225	0.00267		0.2225	0.00267
0.59721	0.16177		0.22262	0.00267		0.22262	0.00267
0.78499	0.07656		0.22361	0.00267		0.22361	0.00267
0.51515	3.29398		0.22461	0.00267		0.22461	0.00267
0.71703	0.12322		0.2256	0.00267		0.2256	0.00267
0.38799	1.26893		0.2266	0.00267		0.2266	0.00267
0.71013	0.20071		0.2275	0.00267		0.2275	0.00267
0.43351	0.75368		0.2276	0.00267		0.2276	0.00267
0.79811	0.06483		0.22859	0.00267		0.22859	0.00267
0.53585	0.15408		0.22959	0.00267		0.22959	0.00267
0.71214	0.12283		0.23058	0.00267		0.23058	0.00267
0.72507	0.13429		0.23158	0.00267		0.23158	0.00267
0.77185	0.07304		0.2325	0.00267		0.2325	0.00267
0.64172	0.25075		0.23258	0.00267		0.23258	0.00267
0.80194	0.06139		0.23357	0.00267		0.23357	0.00267
0.59854	0.24353		0.23457	0.00267		0.23457	0.00267
0.65276	0.16779		0.23556	0.00267		0.23556	0.00267
0.66174	0.1464		0.23656	0.00267		0.23656	0.00267
0.50209	0.19185		0.2375	0.00267		0.2375	0.00267
0.71057	0.11317		0.23756	0.00267		0.23756	0.00267
0.48739	2.08228		0.23855	0.00267		0.23855	0.00267
0.7334	0.11551		0.23955	0.00267		0.23955	0.00267
0.76627	0.07609		0.24054	0.00267		0.24054	0.00267
0.5138	0.13698		0.24154	0.00267		0.24154	0.00267
0.68828	0.09529		0.2425	0.00267		0.2425	0.00267
0.58902	0.33829		0.24254	0.00267		0.24254	0.00267
0.61756	0.28465		0.24353	0.00267		0.24353	0.00267
0.69731	0.12399		0.24453	0.00267		0.24453	0.00267
0.71017	0.11838		0.24552	0.00267		0.24552	0.00267
0.63968	0.09142		0.24652	0.00267		0.24652	0.00267
0.74886	0.10231		0.2475	0.00267		0.2475	0.00267
0.60683	0.22708		0.24752	0.00267		0.24752	0.00267
0.41152	5.40258		0.24851	0.00267		0.24851	0.00267
0.4937	7.30682		0.24951	0.00267		0.24951	0.00267
0.48251	1.74217		0.2505	0.00267		0.2505	0.00267
0.47165	0.81946		0.2515	0.00267		0.2515	0.00267
0.46379	1.35306		0.25249	0.00267		0.25249	0.00267
0.78458	0.1		0.2525	0.00267		0.2525	0.00267
0.62272	0.17368		0.25349	0.00267		0.25349	0.00267
0.44667	0.3532		0.25449	0.00267		0.25449	0.00267
0.77687	0.08092		0.25548	0.00267		0.25548	0.00267
0.68295	0.12144		0.25648	0.00267		0.25648	0.00267
0.75659	0.06489		0.25747	0.00267		0.25747	0.00267
0.51	0.17299		0.2575	0.00267		0.2575	0.00267
0.50482	3.53291		0.25847	0.00267		0.25847	0.00267
0.71686	0.1539		0.25947	0.00267		0.25947	0.00267
0.44643	1.81515		0.26046	0.00267		0.26046	0.00267
0.72321	0.11257		0.26146	0.00267		0.26146	0.00267
0.47775	0.27113		0.26245	0.00267		0.26245	0.00267
0.68902	0.08627		0.2625	0.00267		0.2625	0.00267
0.46638	0.65023		0.26345	0.00267		0.26345	0.00267
0.6428	0.09808		0.26445	0.00267		0.26445	0.00267
0.60829	0.09853		0.26544	0.00267		0.26544	0.00267
0.76952	0.07438		0.26644	0.00267		0.26644	0.00267
0.72744	0.13703		0.26743	0.00267		0.26743	0.00267
0.43319	0.9047		0.2675	0.00267		0.2675	0.00267
0.75637	0.08031		0.26843	0.00267		0.26843	0.00267
0.72413	0.09984		0.26943	0.00267		0.26943	0.00267
0.70898	0.15627		0.27042	0.00267		0.27042	0.00267
0.43573	0.67301		0.27142	0.00267		0.27142	0.00267
0.68261	0.18725		0.27241	0.00267		0.27241	0.00267
0.74485	0.12883		0.2725	0.00267		0.2725	0.00267
0.72728	0.10046		0.27341	0.00267		0.27341	0.00267
0.50233	2.9943		0.27441	0.00267		0.27441	0.00267
0.73773	0.08317		0.2754	0.00267		0.2754	0.00267
0.57023	0.14841		0.2764	0.00267		0.2764	0.00267
0.60418	0.13946		0.27739	0.00267		0.27739	0.00267
0.49675	2.57873		0.2775	0.00267		0.2775	0.00267
0.68674	0.1389		0.27839	0.00267		0.27839	0.00267
0.65655	0.09819		0.27939	0.00267		0.27939	0.00267
0.7729	0.11616		0.28038	0.00267		0.28038	0.00267
0.63252	0.25775		0.28138	0.00267		0.28138	0.00267
0.44315	1.73765		0.28237	0.00267		0.28237	0.00267
0.56988	0.11323		0.2825	0.00267		0.2825	0.00267
0.74796	0.12921		0.28337	0.00267		0.28337	0.00267
0.75187	0.07567		0.28437	0.00267		0.28437	0.00267
0.56058	0.15828		0.28536	0.00267		0.28536	0.00267
0.49389	2.39554		0.28636	0.00267		0.28636	0.00267
0.72636	0.08498		0.28735	0.00267		0.28735	0.00267
0.50616	3.32494		0.2875	0.00267		0.2875	0.00267
0.75589	0.07431		0.28835	0.00267		0.28835	0.00267
0.629	0.11824		0.28935	0.00267		0.28935	0.00267
0.80233	0.072		0.29034	0.00267		0.29034	0.00267
0.45015	0.21444		0.29134	0.00267		0.29134	0.00267
0.50081	0.96075		0.29233	0.00267		0.29233	0.00267
0.73749	0.1088		0.2925	0.00267		0.2925	0.00267
0.77681	0.08403		0.29333	0.00267		0.29333	0.00267
0.49382	0.11426		0.29433	0.00267		0.29433	0.00267
0.62896	0.09782		0.29532	0.00267		0.29532	0.00267
0.69345	0.09759		0.29632	0.00267		0.29632	0.00267
0.50388	0.11814		0.29731	0.00267		0.29731	0.00267
0.68731	0.12734		0.2975	0.00267		0.2975	0.00267
0.48114	0.26139		0.29831	0.00267		0.29831	0.00267
0.44625	1.09208		0.29931	0.00267		0.29931	0.00267
0.74754	0.07565		0.3003	0.00267		0.3003	0.00267
0.49382	0.14595		0.3013	0.00267		0.3013	0.00267
0.79793	0.05351		0.30229	0.00267		0.30229	0.00267
0.50611	1.25494		0.3025	0.00267		0.3025	0.00267
0.5625	0.19918		0.30329	0.00267		0.30329	0.00267
0.78986	0.07691		0.30429	0.00267		0.30429	0.00267
0.7822	0.06196		0.30528	0.00267		0.30528	0.00267
0.64369	1.47823		0.30628	0.00267		0.30628	0.00267
0.67687	0.13282		0.30727	0.00267		0.30727	0.00267
0.64659	0.13858		0.3075	0.00267		0.3075	0.00267
0.73814	0.14496		0.30827	0.00267		0.30827	0.00267
0.66705	0.09936		0.30927	0.00267		0.30927	0.00267
0.72814	0.0968		0.31026	0.00267		0.31026	0.00267
0.61721	0.17118		0.31126	0.00267		0.31126	0.00267
0.44934	0.18689		0.31225	0.00267		0.31225	0.00267
0.49085	0.68296		0.3125	0.00267		0.3125	0.00267
0.45553	0.68901		0.31325	0.00267		0.31325	0.00267
0.7797	0.07916		0.31425	0.00267		0.31425	0.00267
0.67009	0.11081		0.31524	0.00267		0.31524	0.00267
0.69923	0.10379		0.31624	0.00267		0.31624	0.00267
0.34818	0.10002		0.31723	0.00267		0.31723	0.00267
0.5032	0.82969		0.3175	0.00267		0.3175	0.00267
0.73254	0.08279		0.31823	0.00267		0.31823	0.00267
0.73989	0.10377		0.31923	0.00267		0.31923	0.00267
0.76635	0.13152		0.32022	0.00267		0.32022	0.00267
0.6798	0.1053		0.32122	0.00267		0.32122	0.00267
0.77505	0.06319		0.32221	0.00267		0.32221	0.00267
0.76265	0.06874		0.3225	0.00267		0.3225	0.00267
0.68271	0.10748		0.32321	0.00267		0.32321	0.00267
0.74922	0.06842		0.32421	0.00267		0.32421	0.00267
0.65946	0.12974		0.3252	0.00267		0.3252	0.00267
0.62683	0.25909		0.3262	0.00267		0.3262	0.00267
0.76054	0.08437		0.32719	0.00267		0.32719	0.00267
0.75519	0.16716		0.3275	0.00267		0.3275	0.00267
0.64512	0.19182		0.32819	0.00267		0.32819	0.00267
0.68596	0.10263		0.32919	0.00267		0.32919	0.00267
0.65523	0.2354		0.33018	0.00267		0.33018	0.00267
0.63049	0.21112		0.33118	0.00267		0.33118	0.00267
0.68913	0.10019		0.33217	0.00267		0.33217	0.00267
0.67432	0.13192		0.3325	0.00267		0.3325	0.00267
0.65039	0.11007		0.33317	0.00267		0.33317	0.00267
0.75798	0.09087		0.33417	0.00267		0.33417	0.00267
0.66798	0.09301		0.33516	0.00267		0.33516	0.00267
0.43703	0.96632		0.33616	0.00267		0.33616	0.00267
0.65355	0.20771		0.33715	0.00267		0.33715	0.00267
0.50982	0.46328		0.3375	0.00267		0.3375	0.00267
0.50075	0.23538		0.33815	0.00267		0.33815	0.00267
0.7459	0.07306		0.33915	0.00267		0.33915	0.00267
0.72525	0.15277		0.34014	0.00267		0.34014	0.00267
0.49872	2.91027		0.34114	0.00267		0.34114	0.00267
0.74002	0.10468		0.34213	0.00267		0.34213	0.00267
0.64273	0.10731		0.3425	0.00267		0.3425	0.00267
0.7341	0.12474		0.34313	0.00267		0.34313	0.00267
0.65835	0.13821		0.34413	0.00267		0.34413	0.00267
0.63316	0.16599		0.34512	0.00267		0.34512	0.00267
0.78935	0.06549		0.34612	0.00267		0.34612	0.00267
0.74131	0.07118		0.34711	0.00267		0.34711	0.00267
0.44161	0.1019		0.3475	0.00267		0.3475	0.00267
0.76973	0.08137		0.34811	0.00267		0.34811	0.00267
0.50952	1.53832		0.34911	0.00267		0.34911	0.00267
0.45964	0.12244		0.3501	0.00267		0.3501	0.00267
0.5148	0.13462		0.3511	0.00267		0.3511	0.00267
0.44479	1.05998		0.35209	0.00267		0.35209	0.00267
0.67838	0.28246		0.3525	0.00267		0.3525	0.00267
0.75593	0.07297		0.35309	0.00267		0.35309	0.00267
0.628	0.10539		0.35409	0.00267		0.35409	0.00267
0.49996	4.42888		0.35508	0.00267		0.35508	0.00267
0.71442	0.13719		0.35608	0.00267		0.35608	0.00267
0.6225	0.62349		0.35707	0.00267		0.35707	0.00267
0.71133	0.15116		0.3575	0.00267		0.3575	0.00267
0.72366	0.09549		0.35807	0.00267		0.35807	0.00267
0.66564	0.11152		0.35907	0.00267		0.35907	0.00267
0.6969	0.11348		0.36006	0.00267		0.36006	0.00267
0.70506	0.08114		0.36106	0.00267		0.36106	0.00267
0.49457	2.58102		0.36205	0.00267		0.36205	0.00267
0.74141	0.12387		0.3625	0.00267		0.3625	0.00267
0.63348	0.08763		0.36305	0.00267		0.36305	0.00267
0.70024	0.08998		0.36405	0.00267		0.36405	0.00267
0.77551	0.07345		0.36504	0.00267		0.36504	0.00267
0.46577	0.31219		0.36604	0.00267		0.36604	0.00267
0.50273	0.35082		0.36703	0.00267		0.36703	0.00267
0.49152	0.6291		0.3675	0.00267		0.3675	0.00267
0.61177	0.16629		0.36803	0.00267		0.36803	0.00267
0.73897	0.12331		0.36903	0.00267		0.36903	0.00267
0.52585	0.51498		0.37002	0.00267		0.37002	0.00267
0.44984	0.85622		0.37102	0.00267		0.37102	0.00267
0.73932	0.12852		0.37201	0.00267		0.37201	0.00267
0.66662	0.13869		0.3725	0.00267		0.3725	0.00267
0.7703	0.06949		0.37301	0.00267		0.37301	0.00267
0.74001	0.08127		0.37401	0.00267		0.37401	0.00267
0.32375	0.08199		0.375	0.00267		0.375	0.00267
0.64526	0.25693		0.376	0.00267		0.376	0.00267
0.74167	0.09674		0.37699	0.00267		0.37699	0.00267
0.43444	0.35783		0.3775	0.00267		0.3775	0.00267
0.71363	0.16652		0.37799	0.00267		0.37799	0.00267
0.44178	0.17808		0.37899	0.00267		0.37899	0.00267
0.6975	0.232		0.37998	0.00267		0.37998	0.00267
0.45551	0.53103		0.38098	0.00267		0.38098	0.00267
0.63414	0.19049		0.38197	0.00267		0.38197	0.00267
0.46311	0.73679		0.3825	0.00267		0.3825	0.00267
0.76853	0.06673		0.38297	0.00267		0.38297	0.00267
0.7471	0.0978		0.38397	0.00267		0.38397	0.00267
0.70825	0.11581		0.38496	0.00267		0.38496	0.00267
0.45193	1.5288		0.38596	0.00267		0.38596	0.00267
0.6199	0.1722		0.38695	0.00267		0.38695	0.00267
0.50733	2.69426		0.3875	0.00267		0.3875	0.00267
0.54746	0.13846		0.38795	0.00267		0.38795	0.00267
0.74689	0.10741		0.38895	0.00267		0.38895	0.00267
0.71706	0.07936		0.38994	0.00267		0.38994	0.00267
0.70969	0.10043		0.39094	0.00267		0.39094	0.00267
0.7593	0.08749		0.39193	0.00267		0.39193	0.00267
0.67936	0.1666		0.3925	0.00267		0.3925	0.00267
0.69383	0.11909		0.39293	0.00267		0.39293	0.00267
0.66421	0.3817		0.39393	0.00267		0.39393	0.00267
0.75716	0.08923		0.39492	0.00268		0.39492	0.00267
0.47878	0.25421		0.39592	0.00268		0.39592	0.00267
0.54666	0.10617		0.39691	0.00268		0.39691	0.00267
0.64836	0.09632		0.3975	0.00268		0.3975	0.00267
0.71241	0.11041		0.39791	0.00269		0.39791	0.00267
0.63357	0.1314		0.39891	0.00269		0.39891	0.00267
0.65477	0.1511		0.3999	0.0027		0.3999	0.00267
0.42434	0.69732		0.4009	0.00271		0.4009	0.00267
0.75558	0.07566		0.40189	0.00272		0.40189	0.00267
0.65607	0.4505		0.4025	0.00273		0.4025	0.00267
0.61532	0.36333		0.40289	0.00274		0.40289	0.00267
0.4881	4.60005		0.40389	0.00276		0.40389	0.00267
0.68326	0.17293		0.40488	0.00279		0.40488	0.00267
0.78513	0.06559		0.40588	0.00283		0.40588	0.00267
0.65706	0.31064		0.40687	0.00288		0.40687	0.00267
0.2898	0.09479		0.4075	0.00291		0.4075	0.00267
0.67285	0.19307		0.40787	0.00293		0.40787	0.00267
0.77017	0.10047		0.40887	0.003		0.40887	0.00267
0.74784	0.10671		0.40986	0.00309		0.40986	0.00267
0.73966	0.08863		0.41086	0.0032		0.41086	0.00267
0.45634	0.54943		0.41185	0.00333		0.41185	0.00267
0.626	0.1657		0.4125	0.00343		0.4125	0.00267
0.73945	0.094		0.41285	0.00348		0.41285	0.00267
0.71363	0.10416		0.41385	0.00367		0.41385	0.00267
0.71957	0.1106		0.41484	0.00389		0.41484	0.00267
0.44933	0.69873		0.41584	0.00416		0.41584	0.00267
0.49413	0.66732		0.41683	0.00447		0.41683	0.00267
0.56752	0.10557		0.4175	0.0047		0.4175	0.00267
0.51458	0.50308		0.41783	0.00483		0.41783	0.00267
0.52416	0.12689		0.41883	0.00524		0.41883	0.00267
0.55267	0.44957		0.41982	0.00572		0.41982	0.00267
0.63163	0.11566		0.42082	0.00626		0.42082	0.00267
0.67999	0.13178		0.42181	0.00687		0.42181	0.00267
0.43918	0.83417		0.4225	0.00734		0.4225	0.00267
0.50883	0.43518		0.42281	0.00756		0.42281	0.00267
0.78328	0.07691		0.42381	0.00833		0.42381	0.00267
0.75478	0.07639		0.4248	0.00917		0.4248	0.00267
0.56718	0.14157		0.4258	0.01009		0.4258	0.00267
0.74297	0.08599		0.42679	0.0111		0.42679	0.00267
0.63439	0.14995		0.4275	0.01185		0.4275	0.00267
0.69256	0.0891		0.42779	0.01217		0.42779	0.00267
0.49998	0.66927		0.42879	0.01333		0.42879	0.00267
0.71101	0.14345		0.42978	0.01454		0.42978	0.00267
0.63879	0.17164		0.43078	0.01582		0.43078	0.00267
0.74082	0.13757		0.43177	0.01714		0.43177	0.00267
0.69228	0.11578		0.4325	0.01813		0.4325	0.00267
0.45779	0.2828		0.43277	0.0185		0.43277	0.00267
0.63267	0.2665		0.43377	0.01988		0.43377	0.00267
0.63321	0.11263		0.43476	0.02126		0.43476	0.00267
0.47859	0.10952		0.43576	0.02263		0.43576	0.00267
0.72422	0.13174		0.43675	0.02397		0.43675	0.00267
0.7389	0.08408		0.4375	0.02494		0.4375	0.00267
0.58578	0.2984		0.43775	0.02526		0.43775	0.00267
0.50396	7.4953		0.43875	0.02648		0.43875	0.00267
0.75149	0.08122		0.43974	0.02761		0.43974	0.00267
0.60942	0.15788		0.44074	0.02863		0.44074	0.00267
0.60609	0.10334		0.44173	0.02953		0.44173	0.00267
0.70662	0.09923		0.4425	0.03013		0.4425	0.00267
0.68147	0.11981		0.44273	0.03029		0.44273	0.00267
0.52513	0.18793		0.44373	0.0309		0.44373	0.00267
0.74562	0.07291		0.44472	0.03134		0.44472	0.00267
0.65597	0.23048		0.44572	0.03161		0.44572	0.00267
0.64705	0.14928		0.44671	0.0317		0.44671	0.00267
0.63249	0.10595		0.4475	0.03165		0.4475	0.00267
0.57528	0.23969		0.44771	0.03161		0.44771	0.00267
0.67069	0.12096		0.44871	0.03135		0.44871	0.00267
0.70863	0.10803		0.4497	0.03091		0.4497	0.00267
0.63565	0.09565		0.4507	0.03031		0.4507	0.00267
0.49854	2.79709		0.45169	0.02955		0.45169	0.00267
0.749	0.1087		0.4525	0.02884		0.4525	0.00267
0.66696	0.17042		0.45269	0.02866		0.45269	0.00267
0.31444	0.20717		0.45369	0.02764		0.45369	0.00267
0.72686	0.15262		0.45468	0.02651		0.45468	0.00267
0.45166	0.56137		0.45568	0.02529		0.45568	0.00267
0.70218	0.11947		0.45667	0.02401		0.45667	0.00267
0.70477	0.12061		0.4575	0.0229		0.4575	0.00267
0.496	5.26486		0.45767	0.02267		0.45767	0.00267
0.61319	0.08753		0.45867	0.0213		0.45867	0.00268
0.45532	0.55217		0.45966	0.01992		0.45966	0.00268
0.7626	0.06815		0.46066	0.01854		0.46066	0.00269
0.60802	0.15101		0.46165	0.01718		0.46165	0.0027
0.50276	0.25402		0.4625	0.01605		0.4625	0.00271
0.46337	0.22572		0.46265	0.01586		0.46265	0.00272
0.72647	0.12251		0.46365	0.01458		0.46365	0.00274
0.46193	0.23922		0.46464	0.01336		0.46464	0.00277
0.72734	0.07241		0.46564	0.01221		0.46564	0.00281
0.72592	0.11721		0.46663	0.01112		0.46663	0.00287
0.77172	0.06519		0.4675	0.01025		0.4675	0.00294
0.51641	0.77969		0.46763	0.01012		0.46763	0.00296
0.67603	0.22804		0.46863	0.00919		0.46863	0.00307
0.50083	0.78674		0.46962	0.00835		0.46962	0.00321
0.74983	0.07991		0.47062	0.00758		0.47062	0.00341
0.76445	0.08518		0.47161	0.00689		0.47161	0.00366
0.0964	0.54337		0.4725	0.00634		0.4725	0.00395
0.7209	0.07247		0.47261	0.00628		0.47261	0.00399
0.66701	0.14863		0.47361	0.00573		0.47361	0.00441
0.49077	0.14164		0.4746	0.00525		0.4746	0.00493
0.64357	0.17705		0.4756	0.00484		0.4756	0.00559
0.77178	0.07487		0.47659	0.00448		0.47659	0.00639
0.63713	0.09407		0.4775	0.00419		0.4775	0.00727
0.68893	0.11846		0.47759	0.00417		0.47759	0.00737
0.51054	1.5356		0.47859	0.0039		0.47859	0.00854
0.55599	0.34406		0.47958	0.00368		0.47958	0.00993
0.5097	0.16045		0.48058	0.00349		0.48058	0.01155
0.67762	0.19143		0.48157	0.00333		0.48157	0.01342
0.45695	0.54554		0.4825	0.00321		0.4825	0.0154
0.4913	3.0676		0.48257	0.0032		0.48257	0.01556
0.69376	0.16351		0.48357	0.00309		0.48357	0.01796
0.64567	0.28292		0.48456	0.00301		0.48456	0.02062
0.7159	0.16779		0.48556	0.00293		0.48556	0.02353
0.64538	0.11897		0.48655	0.00288		0.48655	0.02666
0.75335	0.07424		0.4875	0.00283		0.4875	0.0298
0.49675	0.61535		0.48755	0.00283		0.48755	0.02997
0.44603	1.0466		0.48855	0.00279		0.48855	0.03342
0.68291	0.08868		0.48954	0.00277		0.48954	0.03695
0.67825	0.07594		0.49054	0.00274		0.49054	0.04049
0.7289	0.06784		0.49153	0.00272		0.49153	0.04397
0.50863	1.66455		0.4925	0.00271		0.4925	0.0472
0.76792	0.0775		0.49253	0.00271		0.49253	0.0473
0.49999	7.22565		0.49353	0.0027		0.49353	0.0504
0.59302	0.1843		0.49452	0.00269		0.49452	0.05319
0.60787	0.18963		0.49552	0.00269		0.49552	0.05559
0.67905	0.11081		0.49651	0.00268		0.49651	0.05754
0.78011	0.0797		0.4975	0.00268		0.4975	0.05896
0.72267	0.10054		0.49751	0.00268		0.49751	0.05897
0.48327	0.34817		0.49851	0.00268		0.49851	0.05984
0.75822	0.07431		0.4995	0.00267		0.4995	0.06013
0.57638	0.31865		0.5005	0.00267		0.5005	0.05982
0.50255	2.1274		0.50149	0.00267		0.50149	0.05893
0.45403	0.90044		0.50249	0.00267		0.50249	0.05749
0.45552	0.10541		0.5025	0.00267		0.5025	0.05747
0.64864	0.18877		0.50349	0.00267		0.50349	0.05553
0.648	0.14004		0.50448	0.00267		0.50448	0.05311
0.46952	0.23321		0.50548	0.00267		0.50548	0.05031
0.68871	0.15709		0.50647	0.00267		0.50647	0.0472
0.65221	0.08302		0.50747	0.00267		0.50747	0.04386
0.72408	0.07426		0.5075	0.00267		0.5075	0.04376
0.71753	0.09606		0.50847	0.00267		0.50847	0.04038
0.77534	0.08074		0.50946	0.00267		0.50946	0.03684
0.48874	1.64665		0.51046	0.00267		0.51046	0.03331
0.7502	0.06227		0.51145	0.00267		0.51145	0.02987
0.50247	0.43885		0.51245	0.00267		0.51245	0.02656
0.72843	0.09548		0.5125	0.00267		0.5125	0.0264
0.61014	0.41581		0.51345	0.00267		0.51345	0.02344
0.801	0.07315		0.51444	0.00267		0.51444	0.02054
0.68175	0.17067		0.51544	0.00267		0.51544	0.01788
0.749	0.06844		0.51643	0.00267		0.51643	0.01549
0.65595	0.11024		0.51743	0.00267		0.51743	0.01336
0.1398	0.06845		0.5175	0.00267		0.5175	0.01322
0.47634	0.20688		0.51843	0.00267		0.51843	0.01149
0.65952	0.15209		0.51942	0.00267		0.51942	0.00988
0.65118	0.18972		0.52042	0.00267		0.52042	0.0085
0.7167	0.18358		0.52141	0.00267		0.52141	0.00733
0.48852	4.28946		0.52241	0.00267		0.52241	0.00636
0.72018	0.06832		0.5225	0.00267		0.5225	0.00628
0.63501	0.1269		0.52341	0.00267		0.52341	0.00556
0.57711	0.16188		0.5244	0.00267		0.5244	0.00491
0.62813	0.09033		0.5254	0.00267		0.5254	0.00439
0.4675	0.28131		0.52639	0.00267		0.52639	0.00398
0.73409	0.06535		0.52739	0.00267		0.52739	0.00365
0.49154	0.69403		0.5275	0.00267		0.5275	0.00362
0.50938	0.17103		0.52839	0.00267		0.52839	0.0034
0.58835	0.11333		0.52938	0.00267		0.52938	0.00321
0.55897	0.19175		0.53038	0.00267		0.53038	0.00306
0.53075	0.25971		0.53137	0.00267		0.53137	0.00295
0.65058	0.12964		0.53237	0.00267		0.53237	0.00287
0.50251	0.1975		0.5325	0.00267		0.5325	0.00286
0.74543	0.07627		0.53337	0.00267		0.53337	0.00281
0.74791	0.0674		0.53436	0.00267		0.53436	0.00277
0.7248	0.13646		0.53536	0.00267		0.53536	0.00274
0.44489	0.77178		0.53635	0.00267		0.53635	0.00272
0.69241	0.12488		0.53735	0.00267		0.53735	0.0027
0.44867	0.37105		0.5375	0.00267		0.5375	0.0027
0.61186	0.43076		0.53835	0.00267		0.53835	0.00269
0.66601	0.11113		0.53934	0.00267		0.53934	0.00268
0.73726	0.11178		0.54034	0.00267		0.54034	0.00268
0.46024	0.26123		0.54133	0.00267		0.54133	0.00267
0.69872	0.14716		0.54233	0.00267		0.54233	0.00267
0.56276	0.28919		0.5425	0.00267		0.5425	0.00267
0.67812	0.16142		0.54333	0.00267		0.54333	0.00267
0.56373	0.17914		0.54432	0.00267		0.54432	0.00267
0.73014	0.13965		0.54532	0.00267		0.54532	0.00267
0.7112	0.08417		0.54631	0.00267		0.54631	0.00267
0.64005	0.11061		0.54731	0.00267		0.54731	0.00267
0.76535	0.06763		0.5475	0.00267		0.5475	0.00267
0.45739	0.32989		0.54831	0.00267		0.54831	0.00267
0.46871	0.10612		0.5493	0.00267		0.5493	0.00267
0.61513	0.23887		0.5503	0.00267		0.5503	0.00267
0.78434	0.0978		0.55129	0.00267		0.55129	0.00267
0.6819	0.15723		0.55229	0.00267		0.55229	0.00267
0.40591	0.13444		0.5525	0.00267		0.5525	0.00267
0.72846	0.1198		0.55329	0.00267		0.55329	0.00267
0.43144	0.19909		0.55428	0.00267		0.55428	0.00267
0.43846	0.81551		0.55528	0.00267		0.55528	0.00267
0.49465	0.25		0.55627	0.00267		0.55627	0.00267
0.58907	0.13697		0.55727	0.00267		0.55727	0.00267
0.47461	0.10257		0.5575	0.00267		0.5575	0.00267
0.42384	0.1308		0.55827	0.00267		0.55827	0.00267
0.53492	0.13875		0.55926	0.00267		0.55926	0.00267
0.49284	2.70896		0.56026	0.00267		0.56026	0.00267
0.75857	0.08436		0.56125	0.00267		0.56125	0.00267
0.73119	0.0966		0.56225	0.00267		0.56225	0.00267
0.70173	0.10761		0.5625	0.00267		0.5625	0.00267
0.71899	0.07542		0.56325	0.00267		0.56325	0.00267
0.49111	0.39936		0.56424	0.00267		0.56424	0.00267
0.69817	0.07359		0.56524	0.00267		0.56524	0.00267
0.50116	1.6237		0.56623	0.00267		0.56623	0.00267
0.75909	0.09455		0.56723	0.00267		0.56723	0.00267
0.74734	0.08251		0.5675	0.00267		0.5675	0.00267
0.49973	4.3138		0.56823	0.00267		0.56823	0.00267
0.75984	0.07416		0.56922	0.00267		0.56922	0.00267
0.69681	0.15945		0.57022	0.00267		0.57022	0.00267
0.49712	2.71854		0.57121	0.00267		0.57121	0.00267
0.53608	0.15841		0.57221	0.00267		0.57221	0.00267
0.66746	0.21066		0.5725	0.00267		0.5725	0.00267
0.70788	0.08818		0.57321	0.00267		0.57321	0.00267
0.45282	0.66335		0.5742	0.00267		0.5742	0.00267
0.62066	0.18949		0.5752	0.00267		0.5752	0.00267
0.47371	0.31904		0.57619	0.00267		0.57619	0.00267
0.73923	0.10069		0.57719	0.00267		0.57719	0.00267
0.43964	0.61251		0.5775	0.00267		0.5775	0.00267
0.58746	0.11001		0.57819	0.00267		0.57819	0.00267
0.75511	0.06984		0.57918	0.00267		0.57918	0.00267
0.68776	0.08778		0.58018	0.00267		0.58018	0.00267
0.51009	0.37277		0.58117	0.00267		0.58117	0.00267
0.69768	0.12256		0.58217	0.00267		0.58217	0.00267
0.70398	0.09561		0.5825	0.00267		0.5825	0.00267
0.70885	0.08979		0.58317	0.00267		0.58317	0.00267
0.60062	0.32914		0.58416	0.00267		0.58416	0.00267
0.67349	0.12657		0.58516	0.00267		0.58516	0.00267
0.69975	0.10795		0.58615	0.00267		0.58615	0.00267
0.5022	0.6597		0.58715	0.00267		0.58715	0.00267
0.49342	1.36167		0.5875	0.00267		0.5875	0.00267
0.72638	0.10806		0.58815	0.00267		0.58815	0.00267
0.41066	0.18262		0.58914	0.00267		0.58914	0.00267
0.44664	0.6785		0.59014	0.00267		0.59014	0.00267
0.72489	0.10308		0.59113	0.00267		0.59113	0.00267
0.43406	1.36144		0.59213	0.00267		0.59213	0.00267
0.69257	0.10942		0.5925	0.00267		0.5925	0.00267
0.64825	0.17591		0.59313	0.00267		0.59313	0.00267
0.67828	0.09582		0.59412	0.00267		0.59412	0.00267
0.51989	0.55413		0.59512	0.00267		0.59512	0.00267
0.7935	0.05726		0.59611	0.00267		0.59611	0.00267
0.4676	0.11365		0.59711	0.00267		0.59711	0.00267
0.63409	0.3035		0.5975	0.00267		0.5975	0.00267
0.76319	0.09356		0.59811	0.00267		0.59811	0.00267
0.73563	0.06493		0.5991	0.00267		0.5991	0.00267
0.6669	0.09474		0.6001	0.00267		0.6001	0.00267
0.66563	0.09697		0.60109	0.00267		0.60109	0.00267
0.74852	0.09198		0.60209	0.00267		0.60209	0.00267
0.78121	0.0696		0.6025	0.00267		0.6025	0.00267
0.50778	1.18726		0.60309	0.00267		0.60309	0.00267
0.75857	0.09507		0.60408	0.00267		0.60408	0.00267
0.63691	0.13912		0.60508	0.00267		0.60508	0.00267
0.50799	0.1743		0.60607	0.00267		0.60607	0.00267
0.49217	2.77991		0.60707	0.00267		0.60707	0.00267
0.72873	0.08358		0.6075	0.00267		0.6075	0.00267
0.45649	0.94907		0.60807	0.00267		0.60807	0.00267
0.48232	0.09761		0.60906	0.00267		0.60906	0.00267
0.7475	0.0888		0.61006	0.00267		0.61006	0.00267
0.50417	1.0065		0.61105	0.00267		0.61105	0.00267
0.82776	0.1257		0.61205	0.00267		0.61205	0.00267
0.40639	0.28724		0.6125	0.00267		0.6125	0.00267
0.50068	1.26505		0.61305	0.00267		0.61305	0.00267
0.46214	0.37153		0.61404	0.00267		0.61404	0.00267
0.67071	0.24551		0.61504	0.00267		0.61504	0.00267
0.74982	0.08987		0.61603	0.00267		0.61603	0.00267
0.44675	0.4629		0.61703	0.00267		0.61703	0.00267
0.50202	2.91045		0.6175	0.00267		0.6175	0.00267
0.44552	0.33205		0.61803	0.00267		0.61803	0.00267
0.73734	0.07223		0.61902	0.00267		0.61902	0.00267
0.67207	0.08886		0.62002	0.00267		0.62002	0.00267
0.49982	1.95553		0.62101	0.00267		0.62101	0.00267
0.62691	0.09418		0.62201	0.00267		0.62201	0.00267
0.62638	0.12365		0.6225	0.00267		0.6225	0.00267
0.76017	0.06226		0.62301	0.00267		0.62301	0.00267
0.44828	0.66746		0.624	0.00267		0.624	0.00267
0.77491	0.06041		0.625	0.00267		0.625	0.00267
0.69046	0.10103		0.62599	0.00267		0.62599	0.00267
0.53323	0.34695		0.62699	0.00267		0.62699	0.00267
0.77864	0.06148		0.6275	0.00267		0.6275	0.00267
0.71633	0.08832		0.62799	0.00267		0.62799	0.00267
0.76301	0.06592		0.62898	0.00267		0.62898	0.00267
0.74641	0.12291		0.62998	0.00267		0.62998	0.00267
0.70722	0.08419		0.63097	0.00267		0.63097	0.00267
0.61263	0.41441		0.63197	0.00267		0.63197	0.00267
0.65053	0.09554		0.6325	0.00267		0.6325	0.00267
0.46393	0.11242		0.63297	0.00267		0.63297	0.00267
0.75863	0.07211		0.63396	0.00267		0.63396	0.00267
0.53049	0.21826		0.63496	0.00267		0.63496	0.00267
0.47764	0.33904		0.63595	0.00267		0.63595	0.00267
0.58797	0.26917		0.63695	0.00267		0.63695	0.00267
0.65847	0.12758		0.6375	0.00267		0.6375	0.00267
0.71937	0.07194		0.63795	0.00267		0.63795	0.00267
0.52189	0.19416		0.63894	0.00267		0.63894	0.00267
0.50155	3.34573		0.63994	0.00267		0.63994	0.00267
0.66723	0.17461		0.64093	0.00267		0.64093	0.00267
0.47326	0.26643		0.64193	0.00267		0.64193	0.00267
0.66587	0.31141		0.6425	0.00267		0.6425	0.00267
0.48383	0.39493		0.64293	0.00267		0.64293	0.00267
0.48874	1.61976		0.64392	0.00267		0.64392	0.00267
0.43645	1.11731		0.64492	0.00267		0.64492	0.00267
0.71823	0.09509		0.64591	0.00267		0.64591	0.00267
0.44286	0.27464		0.64691	0.00267		0.64691	0.00267
0.73117	0.09017		0.6475	0.00267		0.6475	0.00267
0.75321	0.10647		0.64791	0.00267		0.64791	0.00267
0.45468	0.55142		0.6489	0.00267		0.6489	0.00267
0.66678	0.13931		0.6499	0.00267		0.6499	0.00267
0.498	1.71129		0.65089	0.00267		0.65089	0.00267
0.4412	1.09543		0.65189	0.00267		0.65189	0.00267
0.44234	2.23475		0.6525	0.00267		0.6525	0.00267
0.72445	0.08486		0.65289	0.00267		0.65289	0.00267
0.53087	0.18555		0.65388	0.00267		0.65388	0.00267
0.74474	0.07695		0.65488	0.00267		0.65488	0.00267
0.75549	0.08426		0.65587	0.00267		0.65587	0.00267
0.58785	0.09775		0.65687	0.00267		0.65687	0.00267
0.48613	5.4429		0.6575	0.00267		0.6575	0.00267
0.50278	0.89039		0.65787	0.00267		0.65787	0.00267
0.74227	0.08463		0.65886	0.00267		0.65886	0.00267
0.67182	0.14206		0.65986	0.00267		0.65986	0.00267
0.49235	1.23579		0.66085	0.00267		0.66085	0.00267
0.66343	0.22633		0.66185	0.00267		0.66185	0.00267
0.54812	0.55522		0.6625	0.00267		0.6625	0.00267
0.57642	0.48578		0.66285	0.00267		0.66285	0.00267
0.71963	0.08502		0.66384	0.00267		0.66384	0.00267
0.43991	2.34564		0.66484	0.00267		0.66484	0.00267
0.71339	0.14091		0.66583	0.00267		0.66583	0.00267
0.48854	7.35209		0.66683	0.00267		0.66683	0.00267
0.75491	0.12059		0.6675	0.00267		0.6675	0.00267
0.738	0.07547		0.66783	0.00267		0.66783	0.00267
0.43852	1.62869		0.66882	0.00267		0.66882	0.00267
0.64837	0.1642		0.66982	0.00267		0.66982	0.00267
0.63934	0.20704		0.67081	0.00267		0.67081	0.00267
0.60141	0.23359		0.67181	0.00267		0.67181	0.00267
0.76545	0.07583		0.6725	0.00267		0.6725	0.00267
0.57466	0.23075		0.67281	0.00267		0.67281	0.00267
0.72092	0.0754		0.6738	0.00267		0.6738	0.00267
0.49733	0.67464		0.6748	0.00267		0.6748	0.00267
0.69485	0.09743		0.67579	0.00267		0.67579	0.00267
0.56129	0.10245		0.67679	0.00267		0.67679	0.00267
0.74145	0.13612		0.6775	0.00267		0.6775	0.00267
0.66829	0.11249		0.67779	0.00267		0.67779	0.00267
0.65041	0.16716		0.67878	0.00267		0.67878	0.00267
0.53592	0.28969		0.67978	0.00267		0.67978	0.00267
0.44261	0.61205		0.68077	0.00267		0.68077	0.00267
0.74568	0.06999		0.68177	0.00267		0.68177	0.00267
0.72723	0.09398		0.6825	0.00267		0.6825	0.00267
0.66707	0.15467		0.68277	0.00267		0.68277	0.00267
0.49988	2.49482		0.68376	0.00267		0.68376	0.00267
0.71772	0.12505		0.68476	0.00267		0.68476	0.00267
0.56996	0.22739		0.68575	0.00267		0.68575	0.00267
0.49935	0.50663		0.68675	0.00267		0.68675	0.00267
0.71007	0.10193		0.6875	0.00267		0.6875	0.00267
0.75764	0.05808		0.68775	0.00267		0.68775	0.00267
0.8098	0.0728		0.68874	0.00267		0.68874	0.00267
0.73962	0.11317		0.68974	0.00267		0.68974	0.00267
0.74599	0.06872		0.69073	0.00267		0.69073	0.00267
0.66614	0.11931		0.69173	0.00267		0.69173	0.00267
0.45064	2.15012		0.6925	0.00267		0.6925	0.00267
0.70666	0.10767		0.69273	0.00267		0.69273	0.00267
0.65565	0.18604		0.69372	0.00267		0.69372	0.00267
0.08116	0.6945		0.69472	0.00267		0.69472	0.00267
0.49697	7.07645		0.69571	0.00267		0.69571	0.00267
0.44415	2.37983		0.69671	0.00267		0.69671	0.00267
0.62277	0.10294		0.6975	0.00267		0.6975	0.00267
0.42332	0.77025		0.69771	0.00267		0.69771	0.00267
0.73391	0.0998		0.6987	0.00267		0.6987	0.00267
0.66489	0.32862		0.6997	0.00267		0.6997	0.00267
0.6539	0.09637		0.70069	0.00267		0.70069	0.00267
0.493	0.13694		0.70169	0.00267		0.70169	0.00267
0.63329	0.11827		0.7025	0.00267		0.7025	0.00267
0.51064	0.96485		0.70269	0.00267		0.70269	0.00267
0.4988	2.66181		0.70368	0.00267		0.70368	0.00267
0.48628	0.66355		0.70468	0.00267		0.70468	0.00267
0.49773	5.60722		0.70567	0.00267		0.70567	0.00267
0.49697	0.32872		0.70667	0.00267		0.70667	0.00267
0.49357	2.11187		0.7075	0.00267		0.7075	0.00267
0.50071	1.435		0.70767	0.00267		0.70767	0.00267
0.48331	3.43903		0.70866	0.00267		0.70866	0.00267
0.50021	1.63075		0.70966	0.00267		0.70966	0.00267
0.63266	0.22639		0.71065	0.00267		0.71065	0.00267
0.50922	2.36077		0.71165	0.00267		0.71165	0.00267
0.44918	0.8033		0.7125	0.00267		0.7125	0.00267
0.73268	0.10014		0.71265	0.00267		0.71265	0.00267
0.50559	0.37378		0.71364	0.00267		0.71364	0.00267
0.4326	1.02129		0.71464	0.00267		0.71464	0.00267
0.63803	0.1416		0.71563	0.00267		0.71563	0.00267
0.4928	1.46993		0.71663	0.00267		0.71663	0.00267
0.49536	1.09904		0.7175	0.00267		0.7175	0.00267
0.51723	0.22039		0.71763	0.00267		0.71763	0.00267
0.66896	0.12851		0.71862	0.00267		0.71862	0.00267
0.45866	1.61135		0.71962	0.00267		0.71962	0.00267
0.7491	0.08025		0.72061	0.00267		0.72061	0.00267
0.67159	0.17643		0.72161	0.00267		0.72161	0.00267
0.48712	3.26383		0.7225	0.00267		0.7225	0.00267
0.49086	1.4483		0.72261	0.00267		0.72261	0.00267
0.67065	0.10794		0.7236	0.00267		0.7236	0.00267
0.4837	0.40405		0.7246	0.00267		0.7246	0.00267
0.54378	0.17823		0.72559	0.00267		0.72559	0.00267
0.49548	2.65008		0.72659	0.00267		0.72659	0.00267
0.43837	0.98024		0.7275	0.00267		0.7275	0.00267
0.48495	0.10159		0.72759	0.00267		0.72759	0.00267
0.65351	0.09093		0.72858	0.00267		0.72858	0.00267
0.49068	0.55871		0.72958	0.00267		0.72958	0.00267
0.68974	0.18978		0.73057	0.00267		0.73057	0.00267
0.48443	6.79447		0.73157	0.00267		0.73157	0.00267
0.70928	0.09094		0.7325	0.00267		0.7325	0.00267
0.45518	0.27008		0.73257	0.00267		0.73257	0.00267
0.65869	0.09693		0.73356	0.00267		0.73356	0.00267
0.75426	0.09627		0.73456	0.00267		0.73456	0.00267
0.54196	0.1201		0.73555	0.00267		0.73555	0.00267
0.68988	0.09998		0.73655	0.00267		0.73655	0.00267
0.43852	0.53908		0.7375	0.00267		0.7375	0.00267
0.50269	1.48796		0.73755	0.00267		0.73755	0.00267
0.5069	1.11035		0.73854	0.00267		0.73854	0.00267
0.43053	0.78013		0.73954	0.00267		0.73954	0.00267
0.49432	1.99253		0.74053	0.00267		0.74053	0.00267
0.44308	1.25014		0.74153	0.00267		0.74153	0.00267
0.66623	0.12134		0.7425	0.00267		0.7425	0.00267
0.48964	2.54901		0.74253	0.00267		0.74253	0.00267
0.54895	0.14995		0.74352	0.00267		0.74352	0.00267
0.45062	0.21353		0.74452	0.00267		0.74452	0.00267
0.42712	1.98634		0.74551	0.00267		0.74551	0.00267
0.49323	3.23973		0.74651	0.00267		0.74651	0.00267
0.51454	1.92176		0.7475	0.00267		0.7475	0.00267
0.47689	0.68482		0.74751	0.00267		0.74751	0.00267
0.47302	0.18779		0.7485	0.00267		0.7485	0.00267
0.4879	0.22176		0.7495	0.00267		0.7495	0.00267
0.59293	0.16905		0.75049	0.00267		0.75049	0.00267
0.68752	0.0988		0.75149	0.00267		0.75149	0.00267
0.62463	0.20754		0.75248	0.00267		0.75248	0.00267
0.44826	0.59944		0.7525	0.00267		0.7525	0.00267
0.45215	0.11317		0.75348	0.00267		0.75348	0.00267
0.75683	0.08537		0.75448	0.00267		0.75448	0.00267
0.69067	0.10376		0.75547	0.00267		0.75547	0.00267
0.60215	0.11333		0.75647	0.00267		0.75647	0.00267
0.74155	0.06486		0.75746	0.00267		0.75746	0.00267
0.43247	1.02829		0.7575	0.00267		0.7575	0.00267
0.49616	0.61224		0.75846	0.00267		0.75846	0.00267
0.49673	0.81896		0.75946	0.00267		0.75946	0.00267
0.67026	0.08431		0.76045	0.00267		0.76045	0.00267
0.6913	0.16288		0.76145	0.00267		0.76145	0.00267
0.48896	1.34312		0.76244	0.00267		0.76244	0.00267
0.47471	0.19434		0.7625	0.00267		0.7625	0.00267
0.47147	0.50091		0.76344	0.00267		0.76344	0.00267
0.68766	0.1357		0.76444	0.00267		0.76444	0.00267
0.49782	5.68393		0.76543	0.00267		0.76543	0.00267
0.52183	0.46326		0.76643	0.00267		0.76643	0.00267
0.45874	0.73897		0.76742	0.00267		0.76742	0.00267
0.46903	0.36254		0.7675	0.00267		0.7675	0.00267
0.67131	0.14635		0.76842	0.00267		0.76842	0.00267
0.42915	0.46278		0.76942	0.00267		0.76942	0.00267
0.65321	0.08412		0.77041	0.00267		0.77041	0.00267
0.7152	0.10781		0.77141	0.00267		0.77141	0.00267
0.49177	2.07774		0.7724	0.00267		0.7724	0.00267
0.64783	0.18932		0.7725	0.00267		0.7725	0.00267
0.41913	0.54958		0.7734	0.00267		0.7734	0.00267
0.62197	0.2329		0.7744	0.00267		0.7744	0.00267
0.49964	3.58703		0.77539	0.00267		0.77539	0.00267
0.5062	0.13951		0.77639	0.00267		0.77639	0.00267
0.50455	0.62986		0.77738	0.00267		0.77738	0.00267
0.45245	1.5599		0.7775	0.00267		0.7775	0.00267
0.47244	3.68686		0.77838	0.00267		0.77838	0.00267
0.44581	0.88655		0.77938	0.00267		0.77938	0.00267
0.6156	0.59429		0.78037	0.00267		0.78037	0.00267
0.50904	0.22107		0.78137	0.00267		0.78137	0.00267
0.44277	0.56621		0.78236	0.00267		0.78236	0.00267
0.71568	0.23717		0.7825	0.00267		0.7825	0.00267
0.44699	0.32219		0.78336	0.00267		0.78336	0.00267
0.49162	0.30757		0.78436	0.00267		0.78436	0.00267
0.50028	1.11101		0.78535	0.00267		0.78535	0.00267
0.49486	1.02675		0.78635	0.00267		0.78635	0.00267
0.441	0.60532		0.78734	0.00267		0.78734	0.00267
0.4439	0.27051		0.7875	0.00267		0.7875	0.00267
0.48882	3.35496		0.78834	0.00267		0.78834	0.00267
0.51561	0.23729		0.78934	0.00267		0.78934	0.00267
0.49513	4.40445		0.79033	0.00267		0.79033	0.00267
0.56862	0.10189		0.79133	0.00267		0.79133	0.00267
0.52725	0.13573		0.79232	0.00267		0.79232	0.00267
0.51116	0.76573		0.7925	0.00267		0.7925	0.00267
0.45489	0.43103		0.79332	0.00267		0.79332	0.00267
0.43161	0.67961		0.79432	0.00267		0.79432	0.00267
0.47055	0.23055		0.79531	0.00267		0.79531	0.00267
0.4093	1.70629		0.79631	0.00267		0.79631	0.00267
0.4757	0.56697		0.7973	0.00267		0.7973	0.00267
0.45278	0.59607		0.7975	0.00267		0.7975	0.00267
0.515	0.35808		0.7983	0.00267		0.7983	0.00267
0.44227	0.4783		0.7993	0.00267		0.7993	0.00267
0.51606	0.69918		0.80029	0.00267		0.80029	0.00267
0.72206	0.10504		0.8025	0.00267		0.8025	0.00267
0.42876	2.47888		0.8075	0.00267		0.8075	0.00267
0.62636	0.46947		0.8125	0.00267		0.8125	0.00267
0.51882	0.66424		0.8175	0.00267		0.8175	0.00267
0.73859	0.10923		0.8225	0.00267		0.8225	0.00267
0.65875	0.49348		0.8275	0.00267		0.8275	0.00267
0.48913	3.67068		0.8325	0.00267		0.8325	0.00267
0.75388	0.08524		0.8375	0.00267		0.8375	0.00267
0.43923	0.75866		0.8425	0.00267		0.8425	0.00267
0.45866	2.99943		0.8475	0.00267		0.8475	0.00267
0.47625	0.2103		0.8525	0.00267		0.8525	0.00267
0.53123	0.17506		0.8575	0.00267		0.8575	0.00267
0.49692	4.99104		0.8625	0.00267		0.8625	0.00267
0.63467	0.22983		0.8675	0.00267		0.8675	0.00267
0.5151	0.74384		0.8725	0.00267		0.8725	0.00267
0.49197	3.07186		0.8775	0.00267		0.8775	0.00267
0.61265	0.1383		0.8825	0.00267		0.8825	0.00267
0.6384	0.55551		0.8875	0.00267		0.8875	0.00267
0.49288	2.19053		0.8925	0.00267		0.8925	0.00267
0.74609	0.06938		0.8975	0.00267		0.8975	0.00267
0.49606	0.99457		0.9025	0.00267		0.9025	0.00267
0.47544	0.32889		0.9075	0.00267		0.9075	0.00267
0.50432	2.4235		0.9125	0.00267		0.9125	0.00267
0.49437	3.50206		0.9175	0.00267		0.9175	0.00267
0.54864	0.12169		0.9225	0.00267		0.9225	0.00267
0.42711	2.68043		0.9275	0.00267		0.9275	0.00267
0.69775	0.15021		0.9325	0.00267		0.9325	0.00267
0.5156	0.49545		0.9375	0.00267		0.9375	0.00267
0.42805	2.13303		0.9425	0.00267		0.9425	0.00267
0.46044	0.43859		0.9475	0.00267		0.9475	0.00267
0.59807	0.10878		0.9525	0.00267		0.9525	0.00267
0.71538	0.08163		0.9575	0.00267		0.9575	0.00267
0.49186	3.22613		0.9625	0.00267		0.9625	0.00267
0.53697	0.22238		0.9675	0.00267		0.9675	0.00267
0.44692	0.30379		0.9725	0.00267		0.9725	0.00267
0.42683	0.63249		0.9775	0.00267		0.9775	0.00267
0.43705	2.16774		0.9825	0.00267		0.9825	0.00267
0.4331	0.64498		0.9875	0.00267		0.9875	0.00267
0.44198	1.51505		0.9925	0.00267		0.9925	0.00267
0.48672	5.17243		0.9975	0.00267		0.9975	0.00267
0.48758	4.06887
0.57543	0.13833
0.48739	0.63629
0.4396	2.68316
0.45169	0.68506
0.6244	0.11826
0.64934	0.334
0.50911	0.434
0.67906	0.14224
0.5043	1.37377
0.48883	6.42283
0.49353	0.15859
0.43738	1.33914
0.64453	0.17115
0.4984	3.47838
0.60096	0.10175
0.49663	0.23065
0.70977	0.08565
0.64134	0.3689
0.4464	0.30646
0.60924	0.27442
0.68093	0.11089
0.49832	0.80549
0.6719	0.08726
0.49037	3.68845
0.65668	0.28411
0.41625	1.94696
0.66322	0.07957
0.66803	0.08843
0.64942	0.29976
0.671	0.10364
0.46539	0.25844
0.59892	0.25478
0.68322	0.07789
0.68134	0.14441
0.49233	5.2123
0.48577	7.49915
0.66329	0.08722
0.72522	0.09296
0.50083	1.08688
0.46325	0.17036
0.45802	0.69514
0.64195	0.11103
0.44766	0.9213
0.63126	0.10382
0.7348	0.0823
0.67522	0.07717
0.44874	0.98601
0.71302	0.07838
0.6829	0.112
0.48442	0.40386
0.49341	7.9073
0.44127	0.23458
0.49169	0.19702
0.50464	2.08035
0.45557	0.35135
0.48015	5.78636
0.47828	0.94834
0.67805	0.08337
0.44347	0.69509
0.50113	0.47916
0.50455	1.56308
0.49982	1.20696
0.49792	2.17825
0.31792	0.24702
0.58499	0.16613
0.49901	1.71901
0.49548	1.41812
0.51398	0.13947
0.44999	2.32161
0.52718	0.27921
0.48186	0.20639
0.70982	0.06558
0.50781	1.94541
0.45496	0.29429
0.5443	0.26386
0.49593	0.20194
0.45478	0.30258
0.44304	2.18102
0.48862	3.16723
0.50236	0.18983
0.49669	2.58045
0.556	0.1781
0.5304	0.17135
0.62749	0.11478
0.50504	3.83473
0.51227	0.11463
0.61041	0.10743
0.48849	8.64976
0.50096	1.29566
0.49184	5.35612
0.49421	1.93516
0.44736	2.8478
0.44824	0.80978
0.52091	0.24702
0.56166	0.10734
0.66959	0.09209
0.45509	2.04371
0.7088	0.16644
0.4953	1.68724
0.4431	0.46684
0.53111	0.15165
0.4964	2.33058
0.45065	0.70443
0.41049	0.59113
0.50756	1.08728
0.50604	0.12274
0.70732	0.08121
0.43644	0.65806
0.52237	0.33376
0.48855	3.22812
0.43909	7.91587
0.52026	0.20289
0.73973	0.10548
0.75917	0.07202
0.44092	1.43513
0.4511	0.35443
0.44935	0.37002
0.48737	1.0545
0.66616	0.14326
0.66776	0.10935
0.49796	0.21509
0.49392	1.9336
0.4377	4.49994
0.48335	1.95892
0.4176	2.85141
0.49686	1.53356
0.51911	0.39233
0.50614	1.96735
0.44019	0.13901
0.55275	0.13199
0.55865	2.43473
0.51348	1.01854
0.50256	1.66842
0.43667	1.24566
0.4353	0.28693
0.46026	1.08392
0.68877	0.0961
0.48902	4.95471
0.43106	4.08364
0.44553	0.54283
0.4569	0.6012
0.69721	0.14408
0.4983	3.40766
0.42934	0.93487
0.50595	1.66308
0.48374	1.91421
0.62107	0.14672
0.44176	1.22869
0.6523	0.13412
0.44819	0.21813
0.62825	0.12922
0.72449	0.12529
0.64874	0.14271
0.53521	0.11485
0.49695	0.82281
0.5886	0.12405
0.51767	0.12866
0.50021	0.63837
0.47963	0.30241
0.52378	1.08767
0.49204	2.53119
0.48683	2.72328
0.70976	0.15022
0.63971	0.12261
0.49506	3.61452
0.43614	0.45549
0.48541	1.41511
0.44372	0.25797
0.50283	0.6069
0.43797	0.21896
0.70186	0.07195
0.49926	1.688
0.44332	0.36729
0.56837	4.20394
0.50213	3.94884
0.48973	0.12626
0.42549	0.90184
0.44784	0.2291
0.4997	3.25181
0.45993	0.42047
0.73278	0.08575
0.41416	0.60754
0.69907	0.13125
0.50227	0.19526
0.44453	0.83332
0.7372	0.06568
0.44238	0.35308
0.49213	0.26173
0.45531	0.5725
0.57828	0.2717
0.55638	0.16568
0.50402	2.11047
0.50468	7.53109
0.49871	1.82411
0.40558	0.33536
0.52962	0.25211
0.44397	0.82536
0.42028	0.31367
0.55357	0.15615
0.65629	0.10556
0.54975	0.12216
0.61074	0.31443
0.5047	1.63479
0.43951	0.80392
0.44196	0.61419
0.61688	0.13225
0.49471	6.71555
0.62418	0.09409
0.14867	0.0897
0.64849	0.12486
0.48145	2.125
0.68313	0.12267
0.51651	0.28743
0.65544	0.12922
0.44121	0.4022
0.42105	0.71165
0.49203	1.84211
0.63186	0.10891
0.71139	0.08048
0.48944	1.09785
0.42627	0.97558
0.48826	1.71481
0.51295	2.7912
0.49719	1.00718
0.74953	0.06077
0.70348	0.21956
0.45903	0.27541
0.52508	0.20653
0.45345	0.50955
0.47034	0.20972
0.49946	0.99966
0.48951	1.35761
0.48553	2.4467
0.75543	0.09471
0.50831	0.42563
0.72964	0.09861
0.48965	1.87883
0.5028	3.21312
0.50091	3.32334
0.48906	0.18713
0.5105	0.44197
0.44442	2.19337
0.49276	3.33987
0.65474	0.10262
0.69583	0.08241
0.48342	0.9343
0.45157	0.38635
0.49892	1.51251
0.47875	3.74196
0.44261	0.46653
0.43684	0.70458
0.73729	0.06565
0.43342	0.37689
0.48907	3.2258
0.68631	0.07757
0.68028	0.20726
0.7226	0.08082
0.43566	0.58394
0.49647	1.3163
0.72936	0.08409
0.50124	0.36746
0.6944	0.11336
0.7025	0.07263
0.44196	0.51818
0.69885	0.07847
0.50669	1.4973
0.49614	0.63355
0.50627	0.17882
0.51622	1.7172
0.56112	0.15852
0.48292	4.00597
0.44061	1.20984
0.49698	1.66748
0.62975	0.09136
0.73339	0.08552
0.50483	0.94799
0.49764	1.33024
0.61861	0.13552
0.53923	0.12634
0.60525	0.10116
0.66987	0.12346
0.48745	0.81932
0.7299	0.06316
0.71726	0.12453
0.44775	0.38144
0.45108	0.26415
0.47322	0.38008
0.4277	1.05859
0.45846	0.50167
0.50497	0.53513
0.68805	0.0835
0.65442	0.10698
0.65343	0.16043
0.45131	0.23019
0.49648	4.30531
0.49507	0.96913
0.72635	0.12494
0.47971	0.91548
0.49946	0.17389
0.43597	0.24259
0.68579	0.08796
0.49985	1.84896
0.70417	0.09206
0.48883	1.9672
0.46954	0.20613
0.75496	0.10048
0.71852	0.14229
0.50714	0.16219
0.44104	0.37687
0.67211	0.15766
0.49768	1.70736
0.5501	0.35073
0.73539	0.0692
0.48989	0.87515
0.75905	0.08041
0.44811	0.21047
0.49936	2.3086
0.48772	3.25943
0.57432	0.13813
0.5285	0.39053
0.73467	0.09279
0.47701	3.15277
0.6351	0.1394
0.49537	2.09057
0.49316	1.15298
0.51412	1.49182
0.5022	2.71493
0.70447	0.14248
0.66335	0.08232
0.4807	0.34185
0.57584	0.21831
0.49988	3.29826
0.50502	0.31942
0.50471	0.4949
0.72827	0.09751
0.47733	2.59099
0.70991	0.12242
0.49851	2.33643
0.6311	0.09811
0.58857	0.33793
0.68198	0.09226
0.60438	0.17229
0.69601	0.0898
0.58317	0.2312
0.48634	0.56759
0.49831	4.39823
0.43814	0.80658
0.7114	0.11698
0.52769	0.54245
0.48551	0.5477
0.49164	1.31975
0.45184	1.54734
0.66832	0.11547
0.49359	0.23234
0.49275	7.17822
0.48839	5.97401
0.50512	1.13139
0.50332	1.21419
0.68127	0.13934
0.68488	0.18761
0.63905	0.0937
0.46315	0.26242
0.64864	0.20657
0.49836	3.5753
0.61351	0.11458
0.52871	0.26193
0.57059	0.18384
0.43318	0.46793
0.68457	0.17259
0.50036	0.58155
0.72234	0.08112
0.44903	0.43431
0.68879	0.08176
0.72806	0.0929
0.43636	0.95586
0.52513	0.30784
0.68989	0.14136
0.66741	0.16688
0.71125	0.07264
0.4947	1.41342
0.37751	0.1943
0.46146	0.47856
0.74265	0.07635
0.45926	0.42901
0.71515	0.07437
0.49594	0.51241
0.62759	0.09533
0.74096	0.09685
0.44152	0.81756
0.67997	0.08444
0.46904	0.2347
0.4432	0.37903
0.45647	3.71293
0.64439	0.20284
0.50605	0.39945
0.73776	0.10551
0.52	0.15474
0.49818	1.98772
0.49682	4.08047
0.71812	0.07946
0.69473	0.21293
0.68855	0.17005
0.69458	0.07711
0.48366	2.79493
0.58629	0.1431
0.66445	0.15176
0.44304	0.93871
0.61324	0.14349
0.49322	2.21694
0.50064	2.96962
0.49673	1.8742
0.50212	1.01262
0.49415	0.57278
0.51786	0.74008
0.48368	1.08603
0.71192	0.08965
0.49833	4.16429
0.66816	0.08748
0.50368	2.02674
0.52784	0.1752
0.49427	1.30905
0.50692	0.81108
0.45491	0.28258
0.42763	1.44006
0.49829	2.82993
0.65442	0.13478
0.45701	0.66969
0.69459	0.15181
0.50358	0.71531
0.49003	3.09316
0.45618	0.27206
0.48977	2.94696
0.7248	0.07886
0.68549	0.25271
0.54339	0.09879
0.4398	0.82632
0.66794	0.09375
0.52703	0.17292
0.44039	1.23071
0.44011	0.47519
0.60271	0.19148
0.50882	0.57396
0.60672	0.1343
0.72799	0.11256
0.6641	0.18281
0.63272	0.2169
0.49096	0.51505
0.49447	0.1516
0.44566	0.89961
0.51077	0.38837
0.51735	0.72809
0.69712	0.09458
0.73861	0.07017
0.61231	0.10148
0.75007	0.08423
0.58425	0.11464
0.44222	0.60068
0.54182	0.17134
0.68351	0.20788
0.46408	0.20565
0.42846	0.25773
0.4957	1.16776
0.50503	0.49131
0.49089	0.73919
0.45631	0.28364
0.49315	2.2078
0.44035	1.40953
0.50075	1.3888
0.68989	0.13041
0.5091	2.39489
0.53265	0.1058
0.60557	0.97759
0.49943	1.84249
0.50305	0.32997
0.72857	0.08625
0.4942	5.06171
0.6826	0.17263
0.49971	0.65398
0.43521	1.59514
0.44685	1.09086
0.45902	0.33566
0.50005	4.79829
0.49553	1.77189
0.49468	1.10407
0.425	0.15065
0.50513	4.12716
0.43392	0.51606
0.49099	1.08243
0.50822	0.65448
0.68161	0.08291
0.5248	0.23393
0.5161	1.21872
0.57279	0.12483
0.50022	1.26288
0.49011	3.8102
0.74826	0.10089
0.43873	0.68733
0.39165	0.13783
0.74782	0.09469
0.66212	0.10094
0.59543	0.13109
0.50574	0.13843
0.4273	2.31972
0.70639	0.12868
0.72217	0.07561
0.43848	0.65127
0.45409	0.34718
0.50695	0.4517
0.44575	0.61128
0.29249	0.08271
0.44345	0.22917
0.50804	3.82733
0.54496	0.12692
0.73686	0.10097
0.61205	0.20676
0.50887	0.40494
0.66776	0.15827
0.44184	0.86436
0.72924	0.09845
0.50493	1.80775
0.4309	1.2951
0.62285	0.23921
0.42408	1.71902
0.46236	0.60205
0.4438	0.97349
0.43924	0.6305
0.50022	2.86859
0.59451	0.11378
0.71557	0.09945
0.46859	0.21174
0.48991	0.14575
0.48378	4.75168
0.49142	0.16245
0.65051	0.21634
0.44862	1.19293
0.62365	0.21319
0.75006	0.0652
0.55682	0.44757
0.42779	0.64462
0.49624	8.21894
0.48385	2.01169
0.45258	0.49781
0.68167	0.14711
0.72263	0.12662
0.60994	0.12547
0.4508	1.31051
0.5034	1.06808
0.5053	0.20085
0.56871	0.14347
0.43469	0.87725
0.49574	1.66368
0.57677	1.04301
0.4407	0.6715
0.50523	0.76671
0.62323	0.10279
0.47178	0.26189
0.68599	0.09661
0.43098	0.7381
0.4892	4.50963
0.44486	1.56388
0.48023	0.25472
0.45296	0.53862
0.56363	0.19851
0.50449	1.2896
0.72006	0.08172
0.74036	0.09541
0.50481	0.91436
0.43342	0.80389
0.4406	1.19442
0.7482	0.09846
0.49849	1.92264
0.70863	0.12923
0.68557	0.08865
0.70887	0.08239
0.46951	0.58949
0.51943	0.42396
0.59912	0.19665
0.73579	0.06526
0.48855	1.71534
0.50109	3.48002
0.66194	0.14774
0.49272	2.48544
0.49441	1.37721
0.47099	0.15467
0.55553	0.14719
0.50659	0.72826
0.50859	0.83846
0.5123	0.13451
0.72616	0.07344
0.43444	1.03269
0.71825	0.20341
0.68568	0.12368
0.51181	0.59805
0.46036	0.37157
0.67038	0.18606
0.43486	1.93092
0.49273	2.73616
0.69909	0.11393
0.49761	2.46772
0.51581	2.77594
0.73037	0.06891
0.42367	0.3426
0.4323	1.50725
0.48246	2.69747
0.60991	0.16833
0.63285	0.38428
0.5044	4.99193
0.50438	1.29703
0.49239	4.88295
0.68177	0.10632
0.48669	2.07817
0.49551	0.51741
0.4297	0.6178
0.49888	0.58121
0.70275	0.07336
0.71028	0.07615
0.61815	0.09988
0.51048	0.71013
0.68128	0.09151
0.44254	0.7604
0.46433	0.36138
0.44756	1.40361
0.72094	0.05912
0.69197	0.09393
0.60671	0.1833
0.50104	1.14601
0.41562	0.34249
0.50507	3.74887
0.46811	0.29854
0.53201	0.19453
0.51315	0.14102
0.51745	1.53217
0.52427	0.63217
0.44083	1.45052
0.43929	2.02307
0.45766	0.118
0.48337	3.54251
0.49813	3.58004
0.49204	1.09462
0.61937	0.37008
0.51529	0.8649
0.62181	0.1665
0.44265	1.29634
0.74061	0.06887
0.65771	0.15236
0.66678	0.22721
0.44014	0.19433
0.4379	2.37203
0.65191	0.12382
0.52182	0.34756
0.44428	0.52141
0.49989	0.6484
0.50167	0.67456
0.70424	0.0794
0.50823	1.66496
0.44899	0.40013
0.4926	0.79033
0.67862	0.08682
0.61809	0.11151
0.51112	1.34919
0.44117	2.04452
0.63812	0.14044
0.51276	0.36464
0.41711	0.92632
0.66979	0.20417
0.44467	1.30935
0.54856	0.10717
0.4933	5.38723
0.45041	0.45773
0.43446	0.47536
0.74482	0.11446
0.51343	1.75959
0.4217	1.05786
0.67108	0.13246
0.4257	1.6745
0.55154	0.18216
0.47794	0.43816
0.49717	7.35957
0.54119	0.11057
0.69423	0.14829
0.45048	0.53163
0.4479	1.38992
0.45341	0.33121
0.49336	2.37053
0.42869	0.69303
0.50544	0.79871
0.47445	0.23131
0.5002	1.727
0.50087	1.89633
0.48119	0.28271
0.44577	0.99906
0.70964	0.10067
0.60043	0.14254
0.53221	0.23185
0.49532	1.14719
0.70783	0.09817
0.51633	0.17566
0.50145	0.93732
0.62185	0.16289
0.49587	2.83326
0.689	0.0725
0.71255	0.11337
0.63478	0.234
0.32254	0.20098
0.65946	0.15036
0.44789	0.47492
0.61937	0.3547
0.56866	0.23414
0.44232	0.7418
0.51778	1.16894
0.5162	0.30628
0.50566	1.37555
0.66511	0.17685
0.48671	4.12813
0.75984	0.0991
0.37932	1.86871
0.44805	0.49513
0.71188	0.13546
0.52174	0.19095
0.50413	2.69993
0.47214	0.23981
0.62322	0.15621
0.43179	1.82541
0.48499	1.36123
0.65249	0.09911
0.44978	1.00649
0.69532	0.21572
0.49166	1.74632
0.51062	0.83023
0.67529	0.09064
0.45539	0.77945
0.51793	0.4147
0.42856	0.8368
0.51032	0.96059
0.49003	0.72038
0.4997	1.35034
0.50362	0.99838
0.7339	0.12177
0.4492	2.85179
0.65901	0.14331
0.63537	0.08701
0.49858	0.38711
0.49278	3.58651
0.66503	0.10492
0.74052	0.09437
0.50258	2.4639
0.4373	0.11475
0.54283	0.13382
0.51371	0.60713
0.57234	0.42019
0.52006	0.14652
0.62089	0.19154
0.497	0.53743
0.44214	2.2075
0.71192	0.07113
0.74101	0.06567
0.4454	0.3478
0.49549	1.42312
0.46339	0.41498
0.65705	0.12862
0.76023	0.13362
0.6402	0.19924
0.68158	0.19998
0.73513	0.0756
0.49138	0.91735
0.45262	0.44697
0.46076	0.49519
0.46459	0.18233
0.48471	0.39995
0.75678	0.08934
0.7075	0.07137
0.7588	0.08029
0.50121	0.54327
0.50187	1.75899
0.75394	0.09215
0.50736	0.29097
0.49514	0.67499
0.70579	0.13671
0.50842	1.14444
0.61213	0.12727
0.6827	0.14427
0.49883	3.97171
0.48741	0.61053
0.42775	0.98869
0.46424	0.49683
0.67695	0.15775
0.67942	0.14499
0.44217	0.95485
0.74544	0.07351
0.72608	0.1755
0.42903	0.80438
0.44187	0.38918
0.55166	0.60717
0.66254	0.11113
0.4814	0.41028
0.47555	0.53139
0.70472	0.27104
0.51352	1.33873
0.74199	0.08056
0.58775	0.12238
0.43613	1.59891
0.46589	0.90939
0.69615	0.18674
0.69663	0.19074
0.42923	1.0267
0.71463	0.13468
0.45758	0.54225
0.48837	2.69535
0.73414	0.0747
0.53741	0.10195
0.72094	0.10137
0.54401	0.16621
0.45107	0.5239
0.70696	0.08465
0.33795	0.12225
0.51395	0.70603
0.58966	0.31232
0.72871	0.13574
0.49703	2.63392
0.49166	0.43078
0.78608	0.08115
0.42455	0.54755
0.50176	2.82313
0.54921	0.37925
0.66754	0.14441
0.6556	0.08645
0.44221	0.77731
0.56776	0.09847
0.67387	0.11609
0.50696	0.63697
0.49004	2.64729
0.50951	0.40645
0.52531	0.26208
0.49268	1.95349
0.45589	0.56112
0.64732	0.12719
0.41706	1.03037
0.50033	1.94659
0.62088	0.11552
0.52769	0.47515
0.48992	6.93302
0.70988	0.1356
0.76026	0.07683
0.44295	1.06072
0.49349	1.38737
0.76587	0.06541
0.50683	0.66319
0.50469	2.05087
0.45565	0.44678
0.49384	4.01367
0.43817	0.50367
0.49648	0.38002
0.48036	0.13013
0.50513	1.18136
0.45441	1.26446
0.71874	0.21245
0.6554	0.11392
0.66431	0.08097
0.74469	0.06135
0.49859	2.16656
0.49221	3.49479
0.52163	0.14983
0.49592	2.27542
0.49489	0.51459
0.48727	2.06536
0.51758	0.3504
0.49079	1.19671
0.76389	0.06136
0.50117	0.79898
0.71652	0.23209
0.51989	0.27193
0.77109	0.13367
0.52045	0.77473
0.49315	3.15801
0.66889	0.14758
0.50903	1.12647
0.43988	0.6403
0.45632	0.6186
0.491	2.35977
0.65847	0.09873
0.75077	0.13397
0.51966	0.6723
0.51756	0.4109
0.42071	0.47902
0.58402	0.11019
0.73	0.10041
0.52708	0.12148
0.43573	1.33525
0.44658	0.16669
0.42707	1.00168
0.50726	1.00406
0.69933	0.09455
0.80659	0.14449
0.48542	3.23942
0.5041	1.04244
0.43654	0.54271
0.73164	0.06534
0.49571	5.43173
0.51628	0.49495
0.44908	1.9476
0.41602	0.27594
0.508	0.53295
0.44176	0.73935
0.48761	3.20222
0.48735	4.44708
0.50695	0.25708
0.49806	2.83221
0.65261	0.10567
0.49665	2.9434
0.44082	0.90747
0.43634	0.54613
0.49387	2.15776
0.7364	0.06197
0.51572	0.37963
0.51147	1.44318
0.7404	0.06193
0.6013	0.19813
0.49776	2.84315
0.50435	0.30904
0.45244	0.50149
0.48329	0.47811
0.45697	0.1358
0.71161	0.11048
0.43727	1.41438
0.51406	0.31873
0.66861	0.20234
0.41088	0.79035
0.43455	0.675
0.50245	0.70206
0.45837	0.27085
0.45673	0.27412
0.49343	3.01671
0.51971	0.60892
0.49327	0.14558
0.51796	0.22116
0.48796	5.92136
0.44259	0.75063
0.44374	0.75493
0.439	3.04646
0.71002	0.07901
0.67775	0.10517
0.7098	0.14665
0.6633	0.11028
0.60124	0.10279
0.50185	6.59
0.42938	1.70289
0.52402	0.17856
0.49454	3.88767
0.51617	0.64207
0.17559	0.20701
0.45034	0.25965
0.50584	0.57905
0.445	0.46485
0.57064	0.15448
0.44947	1.03649
0.50809	2.17579
0.73495	0.09478
0.43143	1.4031
0.44038	2.43185
0.64505	0.08842
0.48833	6.28158
0.44947	0.45458
0.43211	2.51943
0.49013	3.48844
0.75523	0.10549
0.74398	0.08451
0.44857	2.35728
0.63018	0.10993
0.70423	0.11833
0.47897	0.75582
0.5007	4.37065
0.49546	1.09209
0.64017	0.23181
0.42313	1.61994
0.39259	7.65039
0.52735	0.23484
0.492	1.01879
0.49053	0.27906
0.49395	0.6335
0.49595	1.72261
0.43805	1.38764
0.50077	0.75913
0.7566	0.06843
0.49162	4.29129
0.43574	0.43911
0.70919	0.14528
0.45003	1.33922
0.42799	0.5458
0.50002	0.35942
0.74269	0.12872
0.21851	0.17077
0.50241	0.85977
0.43808	0.80688
0.44348	1.10815
0.44173	0.54631
0.49354	3.3426
0.46698	0.21008
[truncated: 4,009 more rows]

## Sheet: Fig. 6c
H31-10R2(Cit) Scatter			H31-10R8(Cit) Scatter			Gaussian-fitting for H31-10R2(Cit)			Gaussian-fitting for H31-10R8(Cit)
BlockDepth	Restime (ms)		BlockDepth	Restime (ms)		BlockDepth	Relative counts		BlockDepth	Relative counts
0.45314	1.33581		0.47961	3.89117		0.3015	0.00127		0.005	0.0014
0.47219	0.28504		0.48865	0.74441		0.30209	0.00127		0.00698	0.0014
0.45066	0.68531		0.49386	2.72747		0.30239	0.00127		0.00797	0.0014
0.4242	0.778		0.48697	1.24633		0.30269	0.00127		0.00896	0.0014
0.47488	0.48641		0.4466	2.02402		0.30299	0.00127		0.00995	0.0014
0.4593	2.37156		0.5484	1.03515		0.30328	0.00127		0.01095	0.0014
0.4486	0.45836		0.50344	1.04622		0.30358	0.00127		0.01194	0.0014
0.46643	0.2848		0.5021	9.83153		0.30388	0.00127		0.01293	0.0014
0.44904	0.54877		0.49292	24.5509		0.30418	0.00127		0.01392	0.0014
0.45899	0.86271		0.47573	2.47862		0.30447	0.00127		0.01491	0.0014
0.46449	0.74474		0.36841	0.70347		0.3045	0.00127		0.015	0.0014
0.44921	1.07181		0.49431	3.96145		0.30477	0.00127		0.0159	0.0014
0.50189	1.53196		0.49276	2.49104		0.30507	0.00127		0.01689	0.0014
0.4698	2.04983		0.48667	5.14213		0.30536	0.00127		0.01788	0.0014
0.4549	2.30625		0.49266	4.24431		0.30566	0.00127		0.01887	0.0014
0.47497	0.25577		0.49072	4.48708		0.30596	0.00127		0.01986	0.0014
0.44857	0.70027		0.51206	0.25418		0.30626	0.00127		0.02086	0.0014
0.47117	0.37374		0.4986	0.26229		0.30655	0.00127		0.02185	0.0014
0.50377	0.21356		0.48799	6.62282		0.30685	0.00127		0.02284	0.0014
0.44993	0.67567		0.48141	4.37607		0.30715	0.00127		0.02383	0.0014
0.45837	0.32366		0.40433	2.73215		0.30745	0.00127		0.02482	0.0014
0.49704	0.22489		0.48717	5.24148		0.3075	0.00127		0.025	0.0014
0.47914	0.26209		0.5125	0.38088		0.30774	0.00127		0.02581	0.0014
0.45659	1.93666		0.50591	0.82488		0.30804	0.00127		0.0268	0.0014
0.45961	0.37454		0.49913	1.22831		0.30834	0.00127		0.02779	0.0014
0.4233	1.31966		0.50193	0.23516		0.30864	0.00127		0.02878	0.0014
0.46937	0.35626		0.49986	0.83253		0.30893	0.00127		0.02977	0.0014
0.47042	0.78399		0.50224	1.15991		0.30923	0.00127		0.03077	0.0014
0.4725	0.29913		0.50094	0.61311		0.30953	0.00127		0.03176	0.0014
0.45127	0.78551		0.49058	1.05413		0.30982	0.00127		0.03275	0.0014
0.44627	0.50232		0.50257	0.7878		0.31012	0.00127		0.03374	0.0014
0.46523	0.34659		0.49734	0.73915		0.31042	0.00127		0.03473	0.0014
0.46762	1.08702		0.48748	0.25052		0.3105	0.00127		0.035	0.0014
0.46137	2.95412		0.49458	6.00513		0.31072	0.00127		0.03572	0.0014
0.45453	0.91982		0.50142	1.18681		0.31101	0.00127		0.03671	0.0014
0.46461	0.66205		0.41955	1.60698		0.31131	0.00127		0.0377	0.0014
0.4419	0.67391		0.48736	6.57112		0.31161	0.00127		0.03869	0.0014
0.42555	1.02166		0.49038	4.20767		0.31191	0.00127		0.03968	0.0014
0.45491	0.27074		0.49798	0.95625		0.3122	0.00127		0.04068	0.0014
0.44873	1.34371		0.49638	2.39784		0.3125	0.00127		0.04167	0.0014
0.45612	0.73149		0.49119	1.18397		0.3128	0.00127		0.04266	0.0014
0.45268	0.65513		0.49007	1.20713		0.31309	0.00127		0.04365	0.0014
0.41256	1.54723		0.4665	3.98411		0.31339	0.00127		0.04464	0.0014
0.4418	2.98754		0.48084	0.93754		0.3135	0.00127		0.045	0.0014
0.46795	0.4407		0.49846	3.74342		0.31369	0.00127		0.04563	0.0014
0.45602	0.90712		0.49364	3.61081		0.31399	0.00127		0.04662	0.0014
0.48054	0.20998		0.47737	0.75379		0.31428	0.00127		0.04761	0.0014
0.44624	1.47392		0.46638	5.53125		0.31458	0.00127		0.0486	0.0014
0.45428	1.30403		0.48889	7.27978		0.31488	0.00127		0.04959	0.0014
0.44525	5.15421		0.49388	2.21395		0.31518	0.00127		0.05059	0.0014
0.47437	0.48489		0.49544	2.17466		0.31547	0.00127		0.05158	0.0014
0.45235	1.79281		0.50382	0.71081		0.31577	0.00127		0.05257	0.0014
0.44913	0.60283		0.49339	3.13379		0.31607	0.00127		0.05356	0.0014
0.45395	0.39127		0.48776	3.28043		0.31636	0.00127		0.05455	0.0014
0.39963	0.26978		0.47356	8.84151		0.3165	0.00127		0.055	0.0014
0.46796	1.2478		0.48753	1.47867		0.31666	0.00127		0.05554	0.0014
0.46546	0.24761		0.49598	3.37115		0.31696	0.00127		0.05653	0.0014
0.43872	2.24416		0.49679	1.69131		0.31726	0.00127		0.05752	0.0014
0.48081	0.21458		0.51342	0.20286		0.31755	0.00127		0.05851	0.0014
0.47593	0.31095		0.49336	5.91825		0.31785	0.00127		0.0595	0.0014
0.45916	0.45653		0.50295	0.65003		0.31815	0.00127		0.0605	0.0014
0.46284	0.38601		0.48781	4.12415		0.31845	0.00127		0.06149	0.0014
0.4415	0.60726		0.49045	2.83901		0.31874	0.00127		0.06248	0.0014
0.44371	4.05425		0.5006	0.24199		0.31904	0.00127		0.06347	0.0014
0.45654	3.51019		0.48577	1.16695		0.31934	0.00127		0.06446	0.0014
0.45723	0.38307		0.51362	0.64269		0.3195	0.00127		0.065	0.0014
0.46824	0.4531		0.50947	0.35811		0.31964	0.00127		0.06545	0.0014
0.45285	0.95907		0.49482	4.38631		0.31993	0.00127		0.06644	0.0014
0.44519	1.66683		0.49095	0.86484		0.32023	0.00127		0.06743	0.0014
0.454	0.75881		0.5254	0.31902		0.32053	0.00127		0.06842	0.0014
0.44877	0.46198		0.50887	0.39374		0.32082	0.00127		0.06941	0.0014
0.46052	1.26312		0.49451	10.9791		0.32112	0.00127		0.07041	0.0014
0.44682	2.72292		0.50192	0.92708		0.32142	0.00127		0.0714	0.0014
0.47458	0.2582		0.48911	0.43163		0.32172	0.00127		0.07239	0.0014
0.45734	1.70048		0.49739	2.22631		0.32201	0.00127		0.07338	0.0014
0.44542	3.84968		0.49448	2.35443		0.32231	0.00127		0.07437	0.0014
0.34671	3.66568		0.49467	2.24473		0.3225	0.00127		0.075	0.0014
0.47294	0.34287		0.49271	0.33941		0.32261	0.00127		0.07536	0.0014
0.44683	0.89164		0.49623	1.51851		0.32291	0.00127		0.07635	0.0014
0.49276	0.34211		0.49794	2.89798		0.3232	0.00127		0.07734	0.0014
0.44167	0.57795		0.49356	8.11589		0.3235	0.00127		0.07833	0.0014
0.44823	0.61689		0.4853	4.438		0.3238	0.00127		0.07932	0.0014
0.44774	2.83083		0.39724	0.81393		0.32409	0.00127		0.08032	0.0014
0.46304	0.20551		0.4909	2.50268		0.32439	0.00127		0.08131	0.0014
0.45299	0.67094		0.4929	3.85186		0.32469	0.00127		0.0823	0.0014
0.47635	0.39524		0.48857	12.5592		0.32499	0.00127		0.08329	0.0014
0.48181	1.26162		0.49398	0.68784		0.32528	0.00127		0.08428	0.0014
0.44785	2.15441		0.49207	0.4381		0.3255	0.00127		0.085	0.0014
0.44597	0.66305		0.49823	0.35387		0.32558	0.00127		0.08527	0.0014
0.44249	1.83609		0.49386	7.2788		0.32588	0.00127		0.08626	0.0014
0.45735	0.88962		0.48972	2.71193		0.32618	0.00127		0.08725	0.0014
0.48002	0.26245		0.4829	0.30466		0.32647	0.00127		0.08824	0.0014
0.44086	0.95004		0.48862	5.78082		0.32677	0.00127		0.08923	0.0014
0.45256	0.80064		0.49771	1.22413		0.32707	0.00127		0.09023	0.0014
0.44053	0.32168		0.49462	5.68354		0.32736	0.00127		0.09122	0.0014
0.45706	0.73586		0.71453	0.49127		0.32766	0.00127		0.09221	0.0014
0.45242	0.83082		0.50358	0.88557		0.32796	0.00127		0.0932	0.0014
0.44441	0.83895		0.50151	0.45663		0.32826	0.00127		0.09419	0.0014
0.44712	0.73053		0.505	0.35759		0.3285	0.00127		0.095	0.0014
0.44755	1.14313		0.48663	0.64251		0.32855	0.00127		0.09518	0.0014
0.46702	1.01887		0.49558	1.35109		0.32885	0.00127		0.09617	0.0014
0.46017	0.3406		0.49157	0.8785		0.32915	0.00127		0.09716	0.0014
0.46378	0.43079		0.49546	0.67286		0.32945	0.00127		0.09815	0.0014
0.45678	0.95542		0.50378	1.50354		0.32974	0.00127		0.09914	0.0014
0.46783	1.02993		0.49666	0.55166		0.33004	0.00127		0.10014	0.0014
0.43483	0.78998		0.46365	1.27182		0.33034	0.00127		0.10113	0.0014
0.44857	1.53647		0.49011	0.6322		0.33064	0.00127		0.10212	0.0014
0.43913	0.73463		0.55002	0.20462		0.33093	0.00127		0.10311	0.0014
0.47018	1.74785		0.49306	3.71355		0.33123	0.00127		0.1041	0.0014
0.45962	0.96247		0.49117	0.70631		0.3315	0.00127		0.105	0.0014
0.45238	1.38673		0.48679	1.41522		0.33153	0.00127		0.10509	0.0014
0.44248	0.78401		0.50451	1.69073		0.33182	0.00127		0.10608	0.0014
0.46258	1.73221		0.4813	6.66668		0.33212	0.00127		0.10707	0.0014
0.47239	0.3708		0.49157	0.67842		0.33242	0.00127		0.10806	0.0014
0.4522	2.07879		0.49561	0.56733		0.33272	0.00127		0.10905	0.0014
0.45979	1.34623		0.49791	0.46423		0.33301	0.00127		0.11005	0.0014
0.46277	0.70995		0.49512	1.09841		0.33331	0.00127		0.11104	0.0014
0.49168	0.26764		0.49081	0.90884		0.33361	0.00127		0.11203	0.0014
0.46065	0.3985		0.50938	0.86445		0.33391	0.00127		0.11302	0.0014
0.47077	0.61585		0.49084	1.09243		0.3342	0.00127		0.11401	0.0014
0.43463	1.68386		0.50078	3.53885		0.3345	0.00127		0.115	0.0014
0.4419	1.15038		0.53723	0.22716		0.3348	0.00127		0.115	0.0014
0.45367	0.80262		0.50335	0.7917		0.33509	0.00127		0.11599	0.0014
0.44887	0.74655		0.49097	1.51698		0.33539	0.00127		0.11698	0.0014
0.44769	2.53426		0.47485	0.43888		0.33569	0.00127		0.11797	0.0014
0.44159	0.73487		0.49058	1.00613		0.33599	0.00127		0.11896	0.0014
0.44714	0.95557		0.50307	2.65146		0.33628	0.00127		0.11995	0.0014
0.45074	4.02052		0.49507	5.74328		0.33658	0.00127		0.12095	0.0014
0.42824	2.36567		0.48591	4.23848		0.33688	0.00127		0.12194	0.0014
0.46773	0.52367		0.49372	0.60271		0.33718	0.00127		0.12293	0.0014
0.453	0.69378		0.49659	0.25543		0.33747	0.00127		0.12392	0.0014
0.45293	0.27621		0.49957	1.60701		0.3375	0.00127		0.12491	0.0014
0.45707	1.3181		0.50102	1.87942		0.33777	0.00127		0.125	0.0014
0.45385	0.72321		0.494	2.73858		0.33807	0.00127		0.1259	0.0014
0.44951	3.64738		0.49984	1.01502		0.33836	0.00127		0.12689	0.0014
0.43973	0.86781		0.49055	1.92751		0.33866	0.00127		0.12788	0.0014
0.43699	0.82653		0.49296	0.69691		0.33896	0.00127		0.12887	0.0014
0.45374	0.7942		0.49122	1.05072		0.33926	0.00127		0.12986	0.0014
0.44052	2.43523		0.49767	0.48712		0.33955	0.00127		0.13086	0.0014
0.48409	0.21728		0.49675	2.59367		0.33985	0.00127		0.13185	0.0014
0.46302	0.29434		0.4961	2.23073		0.34015	0.00127		0.13284	0.0014
0.46914	0.42463		0.51349	0.22784		0.34045	0.00127		0.13383	0.0014
0.42922	0.40275		0.49062	2.14379		0.3405	0.00127		0.13482	0.0014
0.48307	0.35313		0.4926	3.09107		0.34074	0.00127		0.135	0.0014
0.47071	0.24364		0.48842	5.9265		0.34104	0.00127		0.13581	0.0014
0.45008	1.17422		0.4775	0.3195		0.34134	0.00127		0.1368	0.0014
0.44342	0.55129		0.49671	1.52239		0.34164	0.00127		0.13779	0.0014
0.43707	0.24968		0.49471	5.07831		0.34193	0.00127		0.13878	0.0014
0.44221	1.064		0.49072	1.45769		0.34223	0.00127		0.13977	0.0014
0.46619	0.20661		0.49772	1.27949		0.34253	0.00127		0.14077	0.0014
0.46123	0.36591		0.49221	1.76962		0.34282	0.00127		0.14176	0.0014
0.48481	0.20201		0.49632	6.82583		0.34312	0.00127		0.14275	0.0014
0.4403	0.45668		0.49421	5.9301		0.34342	0.00127		0.14374	0.0014
0.49599	0.20546		0.48755	0.3086		0.3435	0.00127		0.14473	0.0014
0.45411	2.236		0.49713	1.03994		0.34372	0.00127		0.145	0.0014
0.45491	0.24048		0.49631	2.01719		0.34401	0.00127		0.14572	0.0014
0.47214	0.68679		0.49095	1.55562		0.34431	0.00127		0.14671	0.0014
0.47884	0.31054		0.50855	0.56635		0.34461	0.00127		0.1477	0.0014
0.44955	1.74774		0.50273	0.60346		0.34491	0.00127		0.14869	0.0014
0.07772	2.38344		0.48547	3.97901		0.3452	0.00127		0.14968	0.0014
0.44365	0.43384		0.49532	1.37957		0.3455	0.00127		0.15068	0.0014
0.44579	1.51827		0.49808	0.83949		0.3458	0.00127		0.15167	0.0014
0.45875	3.10343		0.4904	0.77022		0.34609	0.00127		0.15266	0.0014
0.45232	3.95169		0.49951	1.47383		0.34639	0.00127		0.15365	0.0014
0.45971	1.18733		0.48438	0.88466		0.3465	0.00127		0.15464	0.0014
0.4435	0.46291		0.48821	2.69382		0.34669	0.00127		0.155	0.0014
0.46858	0.29368		0.495	4.1004		0.34699	0.00127		0.15563	0.0014
0.4642	0.50443		0.50091	1.46086		0.34728	0.00127		0.15662	0.0014
0.46095	2.0061		0.48589	6.42381		0.34758	0.00127		0.15761	0.0014
0.46669	0.76426		0.48445	2.7634		0.34788	0.00127		0.1586	0.0014
0.43745	0.41268		0.49287	0.43923		0.34818	0.00127		0.15959	0.0014
0.44392	0.60846		0.49021	0.44243		0.34847	0.00127		0.16059	0.0014
0.45939	1.72966		0.50365	0.41077		0.34877	0.00127		0.16158	0.0014
0.47199	0.4626		0.48991	1.27124		0.34907	0.00127		0.16257	0.0014
0.43763	0.24737		0.51112	1.72604		0.34936	0.00127		0.16356	0.0014
0.45002	0.95236		0.32653	5.58264		0.3495	0.00127		0.16455	0.0014
0.44983	0.91059		0.48257	3.94417		0.34966	0.00127		0.165	0.0014
0.45834	1.1719		0.48755	2.90404		0.34996	0.00127		0.16554	0.0014
0.41685	2.46671		0.49727	1.33068		0.35026	0.00127		0.16653	0.0014
0.44499	1.57515		0.49245	1.2551		0.35055	0.00127		0.16752	0.0014
0.46082	0.61273		0.50022	1.43891		0.35085	0.00127		0.16851	0.0014
0.45006	0.81124		0.46654	4.03322		0.35115	0.00127		0.1695	0.0014
0.52489	0.21412		0.52161	0.46698		0.35145	0.00127		0.1705	0.0014
0.47511	0.37628		0.4926	0.88374		0.35174	0.00127		0.17149	0.0014
0.45227	0.49343		0.4933	0.48219		0.35204	0.00127		0.17248	0.0014
0.45974	0.20437		0.49021	4.25675		0.35234	0.00127		0.17347	0.0014
0.45454	0.33787		0.49114	5.63427		0.3525	0.00127		0.17446	0.0014
0.44747	0.58595		0.48924	1.33499		0.35264	0.00127		0.175	0.0014
0.4463	0.53694		0.49159	2.44951		0.35293	0.00127		0.17545	0.0014
0.46761	0.42579		0.51014	4.03686		0.35323	0.00127		0.17644	0.0014
0.45317	0.7749		0.49973	1.16296		0.35353	0.00127		0.17743	0.0014
0.45634	0.97334		0.4843	3.89624		0.35382	0.00127		0.17842	0.0014
0.45234	2.92408		0.49235	7.867		0.35412	0.00127		0.17941	0.0014
0.45927	1.27619		0.31014	10.0496		0.35442	0.00127		0.18041	0.0014
0.48444	0.2456		0.49404	6.76058		0.35472	0.00127		0.1814	0.0014
0.45371	2.87126		0.49673	0.96739		0.35501	0.00127		0.18239	0.0014
0.44771	0.70778		0.48124	0.72867		0.35531	0.00127		0.18338	0.0014
0.44825	0.33944		0.48952	0.93064		0.3555	0.00127		0.18437	0.0014
0.45995	0.34277		0.49012	4.50281		0.35561	0.00127		0.185	0.0014
0.46472	2.11938		0.51332	0.2228		0.35591	0.00127		0.18536	0.0014
0.45774	1.03203		0.49257	0.70263		0.3562	0.00127		0.18635	0.0014
0.45072	1.17893		0.49191	4.68588		0.3565	0.00127		0.18734	0.0014
0.47173	0.72626		0.49891	0.86056		0.3568	0.00127		0.18833	0.0014
0.51057	0.20217		0.48988	2.87158		0.35709	0.00127		0.18932	0.0014
0.46115	0.74329		0.48556	0.69586		0.35739	0.00127		0.19032	0.0014
0.49374	0.27456		0.49166	1.91831		0.35769	0.00127		0.19131	0.0014
0.43506	0.50348		0.48737	3.20876		0.35799	0.00127		0.1923	0.0014
0.45516	0.49835		0.49095	4.15555		0.35828	0.00127		0.19329	0.0014
0.45254	1.17222		0.48795	3.96347		0.3585	0.00127		0.19428	0.0014
0.44723	1.55869		0.4899	0.53935		0.35858	0.00127		0.195	0.0014
0.45081	0.72114		0.49264	2.58259		0.35888	0.00127		0.19527	0.0014
0.45017	0.81829		0.4986	2.26706		0.35918	0.00127		0.19626	0.0014
0.44289	1.2151		0.47877	1.31136		0.35947	0.00127		0.19725	0.0014
0.45992	0.69651		0.49319	3.3706		0.35977	0.00127		0.19824	0.0014
0.44232	0.34015		0.47986	0.29896		0.36007	0.00127		0.19923	0.0014
0.4561	1.28265		0.48862	1.56044		0.36036	0.00127		0.20023	0.0014
0.39826	0.2179		0.4686	1.98747		0.36066	0.00127		0.20122	0.0014
0.46712	0.48641		0.49389	1.45113		0.36096	0.00127		0.20221	0.0014
0.47363	0.30725		0.49591	5.33851		0.36126	0.00127		0.2032	0.0014
0.44561	0.38385		0.51034	0.21484		0.3615	0.00127		0.20419	0.0014
0.46028	0.32336		0.4902	4.24878		0.36155	0.00127		0.205	0.0014
0.4526	1.67771		0.48747	4.38118		0.36185	0.00127		0.20518	0.0014
0.44947	0.31548		0.50279	0.69552		0.36215	0.00127		0.20617	0.0014
0.42102	0.83026		0.46823	5.6072		0.36245	0.00127		0.20716	0.0014
0.4543	0.64676		0.50472	0.38471		0.36274	0.00127		0.20815	0.0014
0.44399	0.26035		0.51691	0.30621		0.36304	0.00127		0.20914	0.0014
0.45124	0.36664		0.49051	8.13006		0.36334	0.00127		0.21014	0.0014
0.45243	0.70642		0.49012	2.05858		0.36364	0.00127		0.21113	0.0014
0.45265	0.97805		0.48927	0.65718		0.36393	0.00127		0.21212	0.0014
0.45272	3.2786		0.49536	2.43377		0.36423	0.00127		0.21311	0.0014
0.4414	1.0752		0.49253	1.70455		0.3645	0.00127		0.2141	0.0014
0.4582	1.1154		0.49269	2.20253		0.36453	0.00127		0.215	0.0014
0.42171	1.52827		0.49614	4.5908		0.36482	0.00127		0.21509	0.0014
0.4521	1.07459		0.47728	1.93632		0.36512	0.00127		0.21608	0.0014
0.45264	2.32402		0.48981	5.96465		0.36542	0.00127		0.21707	0.0014
0.45095	0.31354		0.49708	1.73212		0.36572	0.00127		0.21806	0.0014
0.45101	2.48135		0.49621	0.25959		0.36601	0.00127		0.21905	0.0014
0.46935	0.70371		0.48835	8.98685		0.36631	0.00127		0.22005	0.0014
0.4462	0.89324		0.49719	4.03438		0.36661	0.00127		0.22104	0.0014
0.44766	2.25099		0.49848	1.44335		0.36691	0.00127		0.22203	0.0014
0.4637	2.81529		0.49708	2.39633		0.3672	0.00127		0.22302	0.0014
0.46209	1.0936		0.50048	3.3236		0.3675	0.00127		0.22401	0.0014
0.45662	0.40233		0.49458	3.08606		0.3678	0.00127		0.225	0.0014
0.47294	0.3524		0.77402	0.23446		0.36809	0.00127		0.225	0.0014
0.42904	0.43071		0.49166	2.34386		0.36839	0.00127		0.22599	0.0014
0.49599	0.22521		0.48237	0.66449		0.36869	0.00127		0.22698	0.0014
0.47537	2.05169		0.49209	2.07715		0.36899	0.00127		0.22797	0.0014
0.47006	0.24247		0.49865	5.83399		0.36928	0.00127		0.22896	0.0014
0.46152	0.25893		0.52258	2.14325		0.36958	0.00127		0.22995	0.0014
0.44144	0.99565		0.48748	7.91588		0.36988	0.00127		0.23095	0.0014
0.47159	0.31217		0.50142	0.24205		0.37018	0.00127		0.23194	0.0014
0.45188	0.66797		0.50317	1.11176		0.37047	0.00127		0.23293	0.0014
0.52132	0.21171		0.49692	0.92901		0.3705	0.00127		0.23392	0.0014
0.50467	0.203		0.4877	4.87456		0.37077	0.00127		0.23491	0.0014
0.44854	3.7346		0.50369	1.31474		0.37107	0.00127		0.235	0.0014
0.45286	0.31526		0.51507	0.6055		0.37136	0.00127		0.2359	0.0014
0.47327	0.33895		0.48819	0.85494		0.37166	0.00127		0.23689	0.0014
0.44947	0.41367		0.4915	0.96078		0.37196	0.00127		0.23788	0.0014
0.46277	0.87382		0.49367	3.0982		0.37226	0.00127		0.23887	0.0014
0.45993	0.35551		0.36444	4.89891		0.37255	0.00127		0.23986	0.0014
0.44554	1.05884		0.4912	1.82163		0.37285	0.00127		0.24086	0.0014
0.45135	1.06296		0.49893	0.62556		0.37315	0.00127		0.24185	0.0014
0.4345	0.88123		0.48736	4.44841		0.37345	0.00127		0.24284	0.0014
0.45686	1.37848		0.44775	1.93369		0.3735	0.00127		0.24383	0.0014
0.45471	0.58978		0.50273	0.80727		0.37374	0.00127		0.24482	0.0014
0.39152	0.30243		0.49502	1.51977		0.37404	0.00127		0.245	0.0014
0.44216	4.77402		0.49214	2.11794		0.37434	0.00127		0.24581	0.0014
0.45429	0.24689		0.48773	1.98908		0.37464	0.00127		0.2468	0.0014
0.45392	1.59308		0.48454	0.40502		0.37493	0.00127		0.24779	0.0014
0.4493	1.50892		0.48568	0.20261		0.37523	0.00127		0.24878	0.0014
0.45388	1.65253		0.49049	3.14249		0.37553	0.00127		0.24977	0.0014
0.46018	0.60965		0.52682	18.6507		0.37582	0.00127		0.25077	0.0014
0.4684	0.35949		0.4945	2.3898		0.37612	0.00127		0.25176	0.0014
0.47949	0.33992		0.48906	5.41731		0.37642	0.00127		0.25275	0.0014
0.43047	0.66194		0.50627	0.25487		0.3765	0.00127		0.25374	0.0014
0.45574	0.75931		0.50439	3.53912		0.37672	0.00127		0.25473	0.0014
0.47781	0.27718		0.48754	0.23814		0.37701	0.00127		0.255	0.0014
0.4504	0.40605		0.48151	0.93399		0.37731	0.00127		0.25572	0.0014
0.45886	0.93965		0.48628	1.83479		0.37761	0.00127		0.25671	0.0014
0.45599	0.95362		0.49684	2.72789		0.37791	0.00127		0.2577	0.0014
0.47634	0.31796		0.49708	0.51323		0.3782	0.00127		0.25869	0.0014
0.43707	0.65447		0.48911	1.82914		0.3785	0.00127		0.25968	0.0014
0.46568	0.65208		0.49727	2.38006		0.3788	0.00127		0.26068	0.0014
0.45268	1.16546		0.29015	1.88353		0.37909	0.00127		0.26167	0.0014
0.46093	0.60374		0.52354	2.49944		0.37939	0.00127		0.26266	0.0014
0.45343	0.80662		0.49509	3.50433		0.3795	0.00127		0.26365	0.0014
0.43984	2.88218		0.48577	0.23363		0.37969	0.00127		0.26464	0.0014
0.45637	0.74771		0.34206	2.55046		0.37999	0.00127		0.265	0.0014
0.46177	0.33838		0.48231	5.60451		0.38028	0.00127		0.26563	0.0014
0.45657	0.69575		0.49745	0.24769		0.38058	0.00127		0.26662	0.0014
0.44225	0.61525		0.42421	3.46125		0.38088	0.00127		0.26761	0.0014
0.46399	0.91056		0.49518	0.50682		0.38118	0.00127		0.2686	0.0014
0.43943	1.29078		0.50348	0.40334		0.38147	0.00127		0.26959	0.0014
0.47892	0.4947		0.49508	1.29134		0.38177	0.00127		0.27059	0.0014
0.45343	1.17801		0.47516	0.61558		0.38207	0.00127		0.27158	0.0014
0.44843	0.61844		0.49922	0.83991		0.38236	0.00127		0.27257	0.0014
0.43793	0.81931		0.49104	14.1943		0.3825	0.00127		0.27356	0.0014
0.45123	1.98388		0.48743	6.94614		0.38266	0.00127		0.27455	0.0014
0.45209	0.79064		0.48503	13.353		0.38296	0.00127		0.275	0.0014
0.46635	0.78614		0.48096	3.22732		0.38326	0.00127		0.27554	0.0014
0.4431	0.75195		0.49044	0.69048		0.38355	0.00127		0.27653	0.0014
0.44023	2.60326		0.49617	1.86111		0.38385	0.00127		0.27752	0.0014
0.44169	2.87603		0.50418	1.25801		0.38415	0.00127		0.27851	0.0014
0.46271	0.29458		0.49535	0.46672		0.38445	0.00127		0.2795	0.0014
0.44896	1.14769		0.49542	0.44947		0.38474	0.00127		0.2805	0.0014
0.46826	0.32684		0.49447	0.69135		0.38504	0.00127		0.28149	0.0014
0.44944	0.68867		0.4956	0.76123		0.38534	0.00127		0.28248	0.0014
0.4522	1.45172		0.50067	0.48726		0.3855	0.00127		0.28347	0.0014
0.45381	0.88823		0.48577	0.83126		0.38564	0.00127		0.28446	0.0014
0.44834	0.6631		0.48071	3.83594		0.38593	0.00127		0.285	0.0014
0.46564	0.27915		0.48903	5.20655		0.38623	0.00127		0.28545	0.0014
0.45845	0.56811		0.49407	0.4752		0.38653	0.00127		0.28644	0.0014
0.4458	1.55049		0.49738	1.03161		0.38682	0.00127		0.28743	0.0014
0.45864	0.63689		0.48196	9.31559		0.38712	0.00127		0.28842	0.0014
0.44341	0.96948		0.49257	7.61438		0.38742	0.00127		0.28941	0.0014
0.45498	1.23491		0.50061	0.62619		0.38772	0.00127		0.29041	0.0014
0.46969	0.20731		0.49947	0.43303		0.38801	0.00127		0.2914	0.0014
0.46811	1.116		0.49451	1.56666		0.38831	0.00127		0.29239	0.0014
0.43923	1.69022		0.63268	0.48695		0.3885	0.00127		0.29338	0.0014
0.39591	0.39738		0.48624	2.86691		0.38861	0.00127		0.29437	0.0014
0.50138	0.21784		0.497	1.17561		0.38891	0.00127		0.295	0.0014
0.46709	0.46405		0.50176	1.09896		0.3892	0.00127		0.29536	0.0014
0.45716	1.45078		0.49084	1.86679		0.3895	0.00127		0.29635	0.0014
0.46428	0.69827		0.50155	0.57869		0.3898	0.00127		0.29734	0.0014
0.45091	0.61192		0.48527	1.08		0.39009	0.00127		0.29833	0.0014
0.48009	0.30325		0.48897	10.031		0.39039	0.00127		0.29932	0.0014
0.46326	1.07005		0.4862	3.85202		0.39069	0.00127		0.30032	0.0014
0.45245	1.30209		0.46091	14.3815		0.39099	0.00127		0.30131	0.0014
0.452	0.59113		0.45816	1.77943		0.39128	0.00127		0.3023	0.0014
0.38489	5.60444		0.49704	1.27849		0.3915	0.00127		0.30329	0.0014
0.4584	1.26589		0.4931	2.44799		0.39158	0.00127		0.30428	0.0014
0.45172	1.26595		0.50148	2.29068		0.39188	0.00127		0.305	0.0014
0.45216	0.3858		0.48708	5.78962		0.39218	0.00127		0.30527	0.0014
0.45906	0.72239		0.48297	1.63338		0.39247	0.00127		0.30626	0.0014
0.45412	0.25294		0.48732	0.27809		0.39277	0.00127		0.30725	0.0014
0.44723	1.28759		0.48925	5.46863		0.39307	0.00127		0.30824	0.0014
0.45184	0.94002		0.49267	1.77159		0.39336	0.00127		0.30923	0.0014
0.44779	0.82506		0.49236	2.7869		0.39366	0.00127		0.31023	0.0014
0.46373	0.55332		0.49891	3.39437		0.39396	0.00127		0.31122	0.0014
0.50216	0.27152		0.50301	0.68234		0.39426	0.00127		0.31221	0.0014
0.49341	0.26469		0.51021	0.34015		0.3945	0.00127		0.3132	0.0014
0.48012	0.24397		0.49129	1.72176		0.39455	0.00127		0.31419	0.0014
0.45488	0.34911		0.49206	1.02536		0.39485	0.00127		0.315	0.0014
0.41847	0.27193		0.49587	0.66941		0.39515	0.00127		0.31518	0.0014
0.45413	0.52383		0.36651	0.94939		0.39545	0.00127		0.31617	0.0014
0.45813	0.73177		0.49065	3.69008		0.39574	0.00127		0.31716	0.0014
0.44933	0.6438		0.50693	0.63128		0.39604	0.00127		0.31815	0.0014
0.46068	0.60635		0.49913	1.09956		0.39634	0.00127		0.31914	0.0014
0.44642	0.70377		0.4955	1.27688		0.39664	0.00127		0.32014	0.0014
0.46505	0.37632		0.53633	0.91608		0.39693	0.00127		0.32113	0.0014
0.4546	1.41474		0.49398	0.70985		0.39723	0.00127		0.32212	0.0014
0.46016	0.69474		0.49523	3.89301		0.3975	0.00127		0.32311	0.0014
0.44385	2.47605		0.48926	8.15809		0.39753	0.00127		0.3241	0.0014
0.45186	0.78003		0.499	0.61031		0.39782	0.00127		0.325	0.0014
0.45315	0.58582		0.4953	1.94726		0.39812	0.00127		0.32509	0.0014
0.44584	0.60097		0.50207	0.4492		0.39842	0.00127		0.32608	0.0014
0.43557	0.21972		0.49534	0.68109		0.39872	0.00127		0.32707	0.0014
0.45454	1.42308		0.48866	4.46742		0.39901	0.00127		0.32806	0.0014
0.44737	1.10666		0.50311	1.34688		0.39931	0.00127		0.32905	0.0014
0.43142	0.47837		0.48704	4.94599		0.39961	0.00127		0.33005	0.0014
0.47435	0.24488		0.50038	2.05392		0.39991	0.00127		0.33104	0.0014
0.46692	0.41788		0.47365	10.316		0.4002	0.00127		0.33203	0.0014
0.44428	1.23175		0.49422	3.31143		0.4005	0.00127		0.33302	0.0014
0.45025	0.97214		0.49347	3.82237		0.4008	0.00127		0.33401	0.0014
0.45908	1.64651		0.49271	1.85119		0.40109	0.00127		0.335	0.0014
0.44848	0.99688		0.49268	1.9779		0.40139	0.00127		0.33599	0.0014
0.45905	1.06967		0.48548	0.24238		0.40169	0.00127		0.33698	0.0014
0.46698	1.37654		0.48945	0.29517		0.40199	0.00127		0.33797	0.0014
0.46617	0.32386		0.49384	2.07591		0.40228	0.00127		0.33896	0.0014
0.48395	0.31164		0.48607	3.71609		0.40258	0.00127		0.33995	0.0014
0.46088	1.08297		0.47149	9.36969		0.40288	0.00127		0.34095	0.0014
0.45383	2.94874		0.45128	2.89254		0.40318	0.00127		0.34194	0.0014
0.46143	0.55101		0.50412	0.54263		0.40347	0.00127		0.34293	0.0014
0.46885	0.24294		0.64144	0.48893		0.4035	0.00127		0.34392	0.0014
0.08777	0.46329		0.49229	1.71472		0.40377	0.00127		0.34491	0.0014
0.45051	1.10414		0.51029	0.32281		0.40407	0.00127		0.345	0.0014
0.45421	3.82749		0.48674	2.00544		0.40436	0.00127		0.3459	0.0014
0.47606	0.33426		0.45077	5.28788		0.40466	0.00127		0.34689	0.0014
0.46271	1.09653		0.5219	0.47535		0.40496	0.00127		0.34788	0.0014
0.49151	0.27027		0.49413	2.3642		0.40526	0.00127		0.34887	0.0014
0.46639	0.82725		0.49753	2.36495		0.40555	0.00127		0.34986	0.0014
0.45009	0.25951		0.48856	1.2357		0.40585	0.00127		0.35086	0.0014
0.44817	0.68268		0.49663	1.17448		0.40615	0.00127		0.35185	0.0014
0.44731	1.95129		0.4865	0.77157		0.40645	0.00127		0.35284	0.0014
0.44712	1.27748		0.49142	1.68018		0.4065	0.00127		0.35383	0.0014
0.47599	0.33102		0.49163	1.01527		0.40674	0.00127		0.35482	0.0014
0.44281	1.03291		0.48312	1.86784		0.40704	0.00127		0.355	0.0014
0.46792	1.07682		0.52732	0.39995		0.40734	0.00127		0.35581	0.0014
0.46864	0.23858		0.48701	2.00044		0.40764	0.00127		0.3568	0.0014
0.45691	0.82856		0.48264	1.74803		0.40793	0.00127		0.35779	0.0014
0.45307	0.47134		0.48753	3.65541		0.40823	0.00127		0.35878	0.0014
0.46543	0.82361		0.48632	3.11983		0.40853	0.00127		0.35977	0.0014
0.43793	0.44201		0.49148	2.53555		0.40882	0.00127		0.36077	0.0014
0.47626	0.22922		0.49032	0.87428		0.40912	0.00127		0.36176	0.0014
0.46674	0.78953		0.48578	0.78369		0.40942	0.00127		0.36275	0.0014
0.45799	0.31051		0.48831	1.02849		0.4095	0.00127		0.36374	0.0014
0.48566	0.21126		0.4895	0.68646		0.40972	0.00127		0.36473	0.0014
0.45649	0.62823		0.50241	0.81665		0.41001	0.00127		0.365	0.0014
0.45308	0.48747		0.50841	0.25399		0.41031	0.00127		0.36572	0.0014
0.48145	0.366		0.50677	0.46786		0.41061	0.00127		0.36671	0.0014
0.4582	0.67753		0.50145	4.61154		0.41091	0.00127		0.3677	0.0014
0.44815	0.92654		0.49305	0.36964		0.4112	0.00127		0.36869	0.0014
0.45017	1.31552		0.50295	0.65033		0.4115	0.00127		0.36968	0.0014
0.46584	1.06993		0.46886	8.13553		0.4118	0.00128		0.37068	0.0014
0.4394	3.03825		0.49558	1.09059		0.41209	0.00128		0.37167	0.0014
0.46247	0.42356		0.49805	1.80865		0.41239	0.00128		0.37266	0.0014
0.45234	0.35051		0.48226	3.86659		0.4125	0.00128		0.37365	0.0014
0.46059	1.78983		0.47828	1.22983		0.41269	0.00128		0.37464	0.0014
0.43252	0.43713		0.48529	2.28977		0.41299	0.00128		0.375	0.0014
0.4767	0.28193		0.49487	2.11721		0.41328	0.00128		0.37563	0.0014
0.45254	0.49441		0.48551	0.80036		0.41358	0.00128		0.37662	0.0014
0.44427	0.80801		0.49835	3.99641		0.41388	0.00128		0.37761	0.0014
0.44391	0.34311		0.4974	3.65122		0.41418	0.00128		0.3786	0.0014
0.45528	0.75714		0.48748	0.54289		0.41447	0.00129		0.37959	0.0014
0.44946	1.06602		0.49061	1.78569		0.41477	0.00129		0.38059	0.0014
0.45705	0.28657		0.48984	1.78437		0.41507	0.00129		0.38158	0.0014
0.46962	0.57892		0.47503	3.03599		0.41536	0.00129		0.38257	0.0014
0.46475	0.60715		0.5025	1.65008		0.4155	0.00129		0.38356	0.0014
0.44977	1.564		0.49978	0.251		0.41566	0.00129		0.38455	0.0014
0.44524	1.54802		0.48919	2.85104		0.41596	0.0013		0.385	0.0014
0.43829	1.31525		0.48614	8.52193		0.41626	0.0013		0.38554	0.0014
0.45766	1.27316		0.49341	2.0857		0.41655	0.0013		0.38653	0.0014
0.46578	0.57658		0.48581	1.63327		0.41685	0.00131		0.38752	0.0014
0.46306	0.49946		0.48332	1.50788		0.41715	0.00131		0.38851	0.0014
0.4498	2.51312		0.49134	0.77262		0.41745	0.00132		0.3895	0.0014
0.4601	1.0514		0.48791	2.12178		0.41774	0.00132		0.3905	0.0014
0.44862	1.01232		0.50626	0.62211		0.41804	0.00133		0.39149	0.0014
0.47429	0.35906		0.50186	1.02065		0.41834	0.00134		0.39248	0.0014
0.45009	2.72725		0.49449	8.03224		0.4185	0.00134		0.39347	0.0014
0.46279	0.84697		0.52408	0.27395		0.41864	0.00134		0.39446	0.0014
0.45822	0.81634		0.48975	1.09295		0.41893	0.00135		0.395	0.0014
0.44555	1.89676		0.48414	1.30224		0.41923	0.00136		0.39545	0.0014
0.44727	2.41055		0.31119	0.22094		0.41953	0.00137		0.39644	0.0014
0.45546	1.10646		0.50684	1.0012		0.41982	0.00138		0.39743	0.0014
0.46683	0.45338		0.49263	1.02969		0.42012	0.00139		0.39842	0.0014
0.45255	2.58003		0.49687	6.05428		0.42042	0.00141		0.39941	0.0014
0.47755	0.32899		0.50045	1.0998		0.42072	0.00142		0.40041	0.0014
0.4563	0.28688		0.49999	0.30742		0.42101	0.00144		0.4014	0.0014
0.48293	0.30158		0.50389	0.69358		0.42131	0.00146		0.40239	0.0014
0.4658	0.45458		0.50101	0.70364		0.4215	0.00147		0.40338	0.0014
0.44798	1.99846		0.48475	4.53006		0.42161	0.00148		0.40437	0.0014
0.45408	0.29477		0.51395	0.49731		0.42191	0.0015		0.405	0.0014
0.45471	0.73415		0.49513	0.39877		0.4222	0.00152		0.40536	0.0014
0.47507	0.20261		0.4913	1.86989		0.4225	0.00155		0.40635	0.0014
0.45651	0.55809		0.48583	1.9187		0.4228	0.00158		0.40734	0.0014
0.44738	1.4323		0.50689	0.37858		0.42309	0.00161		0.40833	0.0014
0.46397	0.57544		0.49213	1.05386		0.42339	0.00164		0.40932	0.0014
0.45459	2.17031		0.49398	1.66308		0.42369	0.00168		0.41032	0.0014
0.45891	1.88942		0.49077	1.27353		0.42399	0.00172		0.41131	0.0014
0.46577	0.2378		0.48621	3.72135		0.42428	0.00176		0.4123	0.0014
0.44913	1.41252		0.49405	0.7973		0.4245	0.0018		0.41329	0.0014
0.4573	0.48139		0.71266	0.64632		0.42458	0.00181		0.41428	0.0014
0.45039	0.25075		0.49562	1.58974		0.42488	0.00186		0.415	0.0014
0.45914	1.13986		0.49144	1.32629		0.42518	0.00192		0.41527	0.0014
0.45461	2.09039		0.51714	0.22883		0.42547	0.00198		0.41626	0.0014
0.4492	0.78753		0.49377	4.59817		0.42577	0.00205		0.41725	0.0014
0.44585	1.58271		0.4923	1.59088		0.42607	0.00212		0.41824	0.0014
0.45143	0.50671		0.49566	1.03806		0.42636	0.00219		0.41923	0.0014
0.43615	0.27874		0.48433	2.20232		0.42666	0.00228		0.42023	0.0014
0.46026	0.3261		0.48722	2.81541		0.42696	0.00237		0.42122	0.0014
0.45194	1.35907		0.4554	3.79833		0.42726	0.00247		0.42221	0.0014
0.45602	0.77284		0.50334	0.52563		0.4275	0.00255		0.4232	0.0014
0.43757	1.57933		0.48876	6.39055		0.42755	0.00257		0.42419	0.0014
0.44192	0.95529		0.50339	4.15295		0.42785	0.00269		0.425	0.0014
0.43876	1.37356		0.50363	1.20361		0.42815	0.00281		0.42518	0.0014
0.47305	0.29555		0.50137	1.01878		0.42845	0.00294		0.42617	0.0014
0.46835	0.52654		0.48899	3.53106		0.42874	0.00308		0.42716	0.0014
0.46364	0.61626		0.47042	2.66749		0.42904	0.00324		0.42815	0.0014
0.482	0.4054		0.49747	0.60714		0.42934	0.0034		0.42914	0.0014
0.45951	1.49394		0.49827	1.98041		0.42964	0.00357		0.43014	0.0014
0.444	0.66352		0.48516	3.14896		0.42993	0.00376		0.43113	0.0014
0.44527	0.86165		0.48037	6.22351		0.43023	0.00396		0.43212	0.0014
0.51064	0.26448		0.49555	0.92707		0.4305	0.00415		0.43311	0.0014
0.44132	1.88168		0.49194	3.93736		0.43053	0.00417		0.4341	0.0014
0.45084	1.35466		0.50218	1.04033		0.43082	0.0044		0.435	0.0014
0.44708	1.47185		0.50845	0.39263		0.43112	0.00465		0.43509	0.0014
0.44868	0.86065		0.48689	3.56048		0.43142	0.0049		0.43608	0.0014
0.44121	0.74622		0.49998	0.2872		0.43172	0.00518		0.43707	0.0014
0.46855	0.22597		0.47853	3.6776		0.43201	0.00547		0.43806	0.0014
0.49531	0.27128		0.48767	13.9376		0.43231	0.00579		0.43905	0.0014
0.4433	3.96978		0.37022	3.06773		0.43261	0.00612		0.44005	0.0014
0.4515	1.10333		0.49501	1.36255		0.43291	0.00647		0.44104	0.0014
0.45549	0.45858		0.48568	1.03424		0.4332	0.00684		0.44203	0.0014
0.45816	0.39203		0.48949	4.88651		0.4335	0.00723		0.44302	0.0014
0.46214	0.67791		0.48971	0.72382		0.4338	0.00765		0.44401	0.0014
0.42851	1.11597		0.49441	0.59199		0.43409	0.00809		0.445	0.0014
0.41419	2.90954		0.48849	2.42892		0.43439	0.00855		0.445	0.0014
0.46535	1.03946		0.49243	3.73544		0.43469	0.00904		0.44599	0.0014
0.46186	0.4865		0.48346	0.90476		0.43499	0.00956		0.44698	0.0014
0.45312	0.99309		0.48993	2.60264		0.43528	0.0101		0.44797	0.0014
0.4621	3.38287		0.51095	2.77494		0.43558	0.01067		0.44896	0.00141
0.45553	0.48581		0.47567	15.1733		0.43588	0.01127		0.44995	0.00141
0.4537	0.34161		0.49903	3.22154		0.43618	0.0119		0.45095	0.00141
0.45954	1.11329		0.49751	0.62694		0.43647	0.01256		0.45194	0.00141
0.47164	0.21748		0.49378	2.86308		0.4365	0.01262		0.45293	0.00142
0.4589	1.0744		0.49038	2.39407		0.43677	0.01325		0.45392	0.00144
0.44202	1.22811		0.35631	2.30409		0.43707	0.01397		0.45491	0.00146
0.45104	0.50717		0.49992	2.86448		0.43736	0.01472		0.455	0.00146
0.45302	1.60627		0.47854	3.49082		0.43766	0.01551		0.4559	0.00149
0.46081	0.60331		0.48914	1.13115		0.43796	0.01633		0.45689	0.00154
0.46071	0.38766		0.49375	0.44076		0.43826	0.01719		0.45788	0.00162
0.45462	0.53834		0.4967	1.89149		0.43855	0.01808		0.45887	0.00174
0.45467	1.1301		0.50413	1.41621		0.43885	0.019		0.45986	0.00191
0.45328	1.75549		0.49504	0.4148		0.43915	0.01996		0.46086	0.00217
0.46602	0.62742		0.50037	0.56332		0.43945	0.02096		0.46185	0.00255
0.44962	0.50083		0.49185	2.70094		0.4395	0.02115		0.46284	0.00309
0.46301	0.54322		0.49239	5.15173		0.43974	0.02199		0.46383	0.00385
0.47615	0.50307		0.49945	0.57184		0.44004	0.02306		0.46482	0.00491
0.44576	1.16956		0.4972	1.41432		0.44034	0.02417		0.465	0.00514
0.44273	0.59069		0.50207	1.12971		0.44064	0.02531		0.46581	0.00636
0.43451	1.54659		0.49714	2.19146		0.44093	0.02649		0.4668	0.00832
0.46104	0.40132		0.45044	0.22267		0.44123	0.02771		0.46779	0.01092
0.45459	0.25468		0.47957	0.98143		0.44153	0.02896		0.46878	0.01433
0.45937	0.57792		0.4868	1.00702		0.44182	0.03025		0.46977	0.01874
0.46434	1.24564		0.45721	1.16863		0.44212	0.03157		0.47077	0.02434
0.46169	1.41139		0.51735	0.24302		0.44242	0.03293		0.47176	0.03136
0.44873	0.65127		0.47873	1.38766		0.4425	0.03331		0.47275	0.04002
0.46198	0.60646		0.75228	0.22866		0.44272	0.03432		0.47374	0.05053
0.44159	1.14728		0.5112	0.42018		0.44301	0.03575		0.47473	0.06309
0.45634	0.94383		0.50199	1.13816		0.44331	0.0372		0.475	0.06689
0.43515	2.99544		0.48264	0.45109		0.44361	0.03869		0.47572	0.07785
0.41486	3.94606		0.48156	0.65007		0.44391	0.04021		0.47671	0.0949
0.46345	0.75282		0.48649	0.33763		0.4442	0.04176		0.4777	0.11427
0.46077	0.50058		0.50082	3.96477		0.4445	0.04333		0.47869	0.13587
0.47258	0.71973		0.49866	0.67837		0.4448	0.04493		0.47968	0.15951
0.4973	0.23952		0.49114	1.03654		0.44509	0.04655		0.48068	0.18488
0.45371	2.82701		0.49604	1.70998		0.44539	0.04819		0.48167	0.21155
0.4541	0.57159		0.48899	4.01981		0.4455	0.0488		0.48266	0.23896
0.43323	0.58187		0.49561	0.96678		0.44569	0.04986		0.48365	0.26644
0.42859	2.86357		0.4988	1.6159		0.44599	0.05154		0.48464	0.29323
0.44626	0.72351		0.50052	1.83409		0.44628	0.05324		0.485	0.30265
0.44897	1.11628		0.50178	0.34578		0.44658	0.05495		0.48563	0.31855
0.46835	2.27334		0.45812	3.79029		0.44688	0.05668		0.48662	0.34156
0.45668	0.5941		0.51513	0.22591		0.44718	0.05841		0.48761	0.36148
0.43953	1.91427		0.48772	4.80766		0.44747	0.06015		0.4886	0.3776
0.43065	0.92425		0.50151	6.80278		0.44777	0.06189		0.48959	0.38932
0.44539	0.37083		0.49088	2.50939		0.44807	0.06363		0.49059	0.39618
0.46051	1.29808		0.48984	9.63448		0.44836	0.06537		0.49158	0.39792
0.46988	0.42673		0.48335	2.51968		0.4485	0.06616		0.49257	0.39447
0.44833	0.86347		0.48738	3.54249		0.44866	0.0671		0.49356	0.38597
0.46274	1.12828		0.49524	2.84835		0.44896	0.06883		0.49455	0.37274
0.44474	0.7591		0.49444	0.81753		0.44926	0.07055		0.495	0.3653
0.44963	1.50711		0.49844	3.11977		0.44955	0.07225		0.49554	0.3553
0.48829	0.24278		0.48241	4.70673		0.44985	0.07393		0.49653	0.33427
0.49192	0.34265		0.50125	4.53968		0.45015	0.07559		0.49752	0.31041
0.45629	1.13842		0.47993	0.23178		0.45045	0.07723		0.49851	0.28451
0.44892	0.53507		0.49051	1.39791		0.45074	0.07884		0.4995	0.25741
0.47126	0.30284		0.48722	0.74626		0.45104	0.08042		0.5005	0.22987
0.45567	0.53905		0.49256	2.01686		0.45134	0.08197		0.50149	0.20264
0.44807	1.24069		0.49692	1.35599		0.4515	0.0828		0.50248	0.17634
0.43585	0.767		0.48364	1.23692		0.45164	0.08348		0.50347	0.1515
0.45847	1.56281		0.47554	0.55883		0.45193	0.08495		0.50446	0.1285
0.44416	1.00329		0.48946	5.8056		0.45223	0.08638		0.505	0.11684
0.45763	1.07712		0.48739	1.59683		0.45253	0.08776		0.50545	0.10763
0.46287	0.26744		0.49077	1.49956		0.45282	0.0891		0.50644	0.08902
0.48396	0.21425		0.4924	1.03779		0.45312	0.09038		0.50743	0.07273
0.43364	1.16779		0.49348	0.35372		0.45342	0.0916		0.50842	0.05871
0.45877	1.25904		0.49274	1.19135		0.45372	0.09277		0.50941	0.04685
0.40745	0.85095		0.47652	6.83928		0.45401	0.09388		0.51041	0.03697
0.45914	1.25605		0.48586	2.32826		0.45431	0.09492		0.5114	0.02888
0.47792	0.38154		0.4366	8.36051		0.4545	0.09555		0.51239	0.02235
0.49293	0.28062		0.45879	12.4772		0.45461	0.0959		0.51338	0.01716
0.48166	0.45468		0.53857	2.9856		0.45491	0.09681		0.51437	0.0131
0.45561	0.41915		0.5037	0.81829		0.4552	0.09765		0.515	0.01102
0.49168	0.27695		0.49121	0.53833		0.4555	0.09842		0.51536	0.00998
0.44668	0.29411		0.51128	0.58666		0.4558	0.09911		0.51635	0.00761
0.44382	0.79186		0.49526	5.60813		0.45609	0.09973		0.51734	0.00583
0.45202	0.95808		0.48613	2.72176		0.45639	0.10028		0.51833	0.00452
0.43127	0.62299		0.49097	6.13943		0.45669	0.10074		0.51932	0.00357
0.47393	0.28718		0.49984	0.75399		0.45699	0.10113		0.52032	0.00289
0.48569	0.211		0.47727	0.90617		0.45728	0.10143		0.52131	0.00241
0.44867	1.61162		0.48708	7.2918		0.4575	0.10161		0.5223	0.00208
0.4392	0.5279		0.56817	0.57867		0.45758	0.10166		0.52329	0.00185
0.46617	1.00057		0.50034	0.99756		0.45788	0.1018		0.52428	0.00169
0.45518	2.02584		0.52026	0.41268		0.45818	0.10186		0.525	0.00161
0.45635	0.44116		0.48305	0.97314		0.45847	0.10184		0.52527	0.00159
0.41098	2.33368		0.49176	1.1342		0.45877	0.10174		0.52626	0.00152
0.46942	0.25529		0.49529	0.68887		0.45907	0.10155		0.52725	0.00148
0.46108	0.73105		0.48584	1.01239		0.45936	0.10129		0.52824	0.00145
0.46401	0.73379		0.49326	4.50814		0.45966	0.10094		0.52923	0.00143
0.44565	0.83894		0.49564	1.80328		0.45996	0.10052		0.53023	0.00142
0.45511	0.58412		0.48566	6.05779		0.46026	0.10001		0.53122	0.00141
0.47288	0.23079		0.49392	3.23476		0.4605	0.09954		0.53221	0.00141
0.44325	1.31834		0.48889	0.37394		0.46055	0.09943		0.5332	0.00141
0.46456	0.32845		0.4886	0.73638		0.46085	0.09877		0.53419	0.0014
0.42562	2.29037		0.48257	1.83343		0.46115	0.09804		0.535	0.0014
0.47506	0.7509		0.49257	2.60567		0.46145	0.09723		0.53518	0.0014
0.45655	2.20222		0.49149	1.34193		0.46174	0.09636		0.53617	0.0014
0.46023	0.24665		0.51042	1.02194		0.46204	0.09541		0.53716	0.0014
0.46471	0.31457		0.50278	0.75923		0.46234	0.0944		0.53815	0.0014
0.41881	0.25551		0.4882	1.49783		0.46264	0.09332		0.53914	0.0014
0.44939	0.33774		0.49334	2.18609		0.46293	0.09218		0.54014	0.0014
0.68811	0.32378		0.49086	1.50671		0.46323	0.09099		0.54113	0.0014
0.48473	0.33384		0.48787	5.88707		0.4635	0.08985		0.54212	0.0014
0.45509	1.05025		0.49576	1.81893		0.46353	0.08973		0.54311	0.0014
0.44451	2.63914		0.50052	1.19431		0.46382	0.08843		0.5441	0.0014
0.46952	0.2994		0.4863	5.01991		0.46412	0.08707		0.545	0.0014
0.44886	0.42028		0.49601	5.45149		0.46442	0.08566		0.54509	0.0014
0.45334	0.28757		0.51361	0.24352		0.46472	0.08421		0.54608	0.0014
0.46692	0.52598		0.48613	3.50423		0.46501	0.08272		0.54707	0.0014
0.46078	0.62076		0.49391	0.92376		0.46531	0.08119		0.54806	0.0014
0.45792	1.46259		0.49012	2.58759		0.46561	0.07963		0.54905	0.0014
0.44496	1.74649		0.49107	7.27289		0.46591	0.07803		0.55005	0.0014
0.45269	1.11355		0.48749	0.39089		0.4662	0.0764		0.55104	0.0014
0.44747	1.86014		0.48106	2.62593		0.4665	0.07475		0.55203	0.0014
0.45546	1.08803		0.50048	0.76299		0.4668	0.07308		0.55302	0.0014
0.48388	0.38319		0.49128	3.44587		0.46709	0.07138		0.55401	0.0014
0.43549	0.42209		0.4762	1.3471		0.46739	0.06968		0.555	0.0014
0.45018	0.66558		0.50733	0.62844		0.46769	0.06795		0.55599	0.0014
0.47048	0.22351		0.48423	1.69212		0.46799	0.06622		0.55698	0.0014
0.45025	1.3954		0.48639	1.7735		0.46828	0.06449		0.55797	0.0014
0.4406	0.71985		0.4892	3.70917		0.46858	0.06274		0.55896	0.0014
0.44736	1.95157		0.48266	1.00661		0.46888	0.061		0.55995	0.0014
0.44659	0.76702		0.48733	4.31842		0.46918	0.05926		0.56095	0.0014
0.44017	0.5029		0.496	3.96413		0.46947	0.05753		0.56194	0.0014
0.44578	1.13416		0.49222	2.10896		0.4695	0.05737		0.56293	0.0014
0.48944	0.25939		0.49721	4.38575		0.46977	0.0558		0.56392	0.0014
0.46648	0.268		0.48451	0.68615		0.47007	0.05408		0.56491	0.0014
0.43864	1.74314		0.4956	1.69034		0.47036	0.05238		0.565	0.0014
0.48768	0.31662		0.49209	1.59828		0.47066	0.05069		0.5659	0.0014
0.46241	0.64444		0.50645	2.35199		0.47096	0.04901		0.56689	0.0014
0.46082	1.92705		0.48674	0.44873		0.47126	0.04736		0.56788	0.0014
0.49255	0.20544		0.48288	2.19531		0.47155	0.04572		0.56887	0.0014
0.6433	0.3386		0.4906	3.95401		0.47185	0.04411		0.56986	0.0014
0.33847	0.43342		0.59417	0.71187		0.47215	0.04253		0.57086	0.0014
0.4512	1.1036		0.48521	2.30113		0.47245	0.04097		0.57185	0.0014
0.45117	2.2363		0.4976	1.76458		0.4725	0.04069		0.57284	0.0014
0.45333	0.42033		0.49657	2.21278		0.47274	0.03944		0.57383	0.0014
0.45012	2.52409		0.48278	0.45645		0.47304	0.03793		0.57482	0.0014
0.45064	1.3797		0.49118	0.56183		0.47334	0.03646		0.575	0.0014
0.45361	1.36104		0.52053	0.33086		0.47364	0.03502		0.57581	0.0014
0.54122	0.29367		0.51775	0.30496		0.47393	0.03361		0.5768	0.0014
0.48917	0.21957		0.50833	0.49906		0.47423	0.03224		0.57779	0.0014
0.50594	0.22685		0.48302	27.024		0.47453	0.0309		0.57878	0.0014
0.4545	1.4068		0.4842	1.55938		0.47482	0.02959		0.57977	0.0014
0.47914	0.27443		0.48234	0.57921		0.47512	0.02832		0.58077	0.0014
0.45742	1.01951		0.49272	1.21062		0.47542	0.02709		0.58176	0.0014
0.46308	0.56262		0.50342	1.74335		0.4755	0.02676		0.58275	0.0014
0.44905	0.87865		0.49357	6.02266		0.47572	0.02589		0.58374	0.0014
0.46484	0.30059		0.50777	0.26295		0.47601	0.02473		0.58473	0.0014
0.45457	0.45225		0.48772	5.4002		0.47631	0.0236		0.585	0.0014
0.45933	1.40958		0.49871	2.75522		0.47661	0.02252		0.58572	0.0014
0.46886	0.3601		0.48743	7.39817		0.47691	0.02146		0.58671	0.0014
0.45214	1.9157		0.50006	1.13616		0.4772	0.02045		0.5877	0.0014
0.45147	1.34199		0.4881	3.24036		0.4775	0.01947		0.58869	0.0014
0.44543	0.85144		0.49234	1.50411		0.4778	0.01853		0.58968	0.0014
0.45595	0.79418		0.49866	0.41515		0.47809	0.01762		0.59068	0.0014
0.44373	0.88257		0.49127	2.05434		0.47839	0.01675		0.59167	0.0014
0.46459	0.25217		0.49635	2.09412		0.4785	0.01644		0.59266	0.0014
0.44488	1.1471		0.52012	1.59967		0.47869	0.01591		0.59365	0.0014
0.4907	0.2144		0.4908	2.38746		0.47899	0.01511		0.59464	0.0014
0.46293	1.74634		0.45606	0.57918		0.47928	0.01434		0.595	0.0014
0.47315	0.591		0.48536	2.08076		0.47958	0.0136		0.59563	0.0014
0.4861	0.45864		0.49248	0.68253		0.47988	0.01289		0.59662	0.0014
0.44659	0.58935		0.50082	0.45976		0.48018	0.01222		0.59761	0.0014
0.44843	2.44478		0.48564	2.32286		0.48047	0.01158		0.5986	0.0014
0.45181	0.37787		0.50408	0.26236		0.48077	0.01096		0.59959	0.0014
0.46502	0.96057		0.4922	2.00767		0.48107	0.01038		0.60059	0.0014
0.48235	1.16089		0.48633	2.92882		0.48136	0.00982		0.60158	0.0014
0.45819	0.32311		0.49913	0.50283		0.4815	0.00958		0.60257	0.0014
0.44914	1.67506		0.49684	6.08343		0.48166	0.00929		0.60356	0.0014
0.47411	0.46393		0.49917	3.10812		0.48196	0.00879		0.60455	0.0014
0.45422	0.57396		0.49156	2.93353		0.48226	0.00831		0.605	0.0014
0.48753	0.817		0.49164	2.34419		0.48255	0.00786		0.60554	0.0014
0.4444	0.39166		0.50687	0.32		0.48285	0.00744		0.60653	0.0014
0.44801	1.63101		0.50133	0.52396		0.48315	0.00703		0.60752	0.0014
0.46469	0.51185		0.49396	3.57401		0.48345	0.00665		0.60851	0.0014
0.45124	0.72079		0.48437	0.82678		0.48374	0.00629		0.6095	0.0014
0.44694	0.51393		0.4928	1.58147		0.48404	0.00595		0.6105	0.0014
0.44689	4.03107		0.53254	0.24283		0.48434	0.00562		0.61149	0.0014
0.46045	0.83533		0.49436	5.05342		0.4845	0.00546		0.61248	0.0014
0.45489	0.38943		0.48579	4.29678		0.48464	0.00532		0.61347	0.0014
0.44667	0.54303		0.48233	7.40948		0.48493	0.00504		0.61446	0.0014
0.45377	1.24277		0.5491	6.87523		0.48523	0.00477		0.615	0.0014
0.44705	0.72243		0.50015	0.49118		0.48553	0.00452		0.61545	0.0014
0.47145	0.38737		0.48404	4.45069		0.48582	0.00428		0.61644	0.0014
0.46482	0.69903		0.48992	14.2476		0.48612	0.00406		0.61743	0.0014
0.46111	0.89881		0.48886	13.3954		0.48642	0.00386		0.61842	0.0014
0.45925	0.67305		0.48887	5.31182		0.48672	0.00366		0.61941	0.0014
0.45205	0.59817		0.49137	2.77385		0.48701	0.00348		0.62041	0.0014
0.4457	0.6014		0.4925	1.70687		0.48731	0.00331		0.6214	0.0014
0.47131	0.2721		0.48261	6.23533		0.4875	0.00321		0.62239	0.0014
0.45364	0.84071		0.49317	0.40351		0.48761	0.00316		0.62338	0.0014
0.45049	2.55217		0.49858	1.46904		0.48791	0.00301		0.62437	0.0014
0.44212	2.26926		0.50033	0.40248		0.4882	0.00287		0.625	0.0014
0.45642	0.75159		0.48847	1.8322		0.4885	0.00275		0.62536	0.0014
0.43906	1.61686		0.49709	6.16411		0.4888	0.00263		0.62635	0.0014
0.46022	0.27154		0.49921	0.4908		0.48909	0.00252		0.62734	0.0014
0.4453	0.57134		0.48517	1.24647		0.48939	0.00242		0.62833	0.0014
0.45631	1.48243		0.43848	0.70661		0.48969	0.00232		0.62932	0.0014
0.45041	0.97836		0.49942	0.4178		0.48999	0.00224		0.63032	0.0014
0.46176	0.27982		0.48344	4.17138		0.49028	0.00215		0.63131	0.0014
0.46248	0.69134		0.49317	1.68354		0.4905	0.0021		0.6323	0.0014
0.45428	0.67199		0.50897	1.24683		0.49058	0.00208		0.63329	0.0014
0.45847	0.87878		0.48404	2.21071		0.49088	0.00201		0.63428	0.0014
0.4548	1.01442		0.48428	0.31143		0.49118	0.00195		0.635	0.0014
0.49409	0.23475		0.49502	1.40786		0.49147	0.00189		0.63527	0.0014
0.47894	2.05853		0.49644	0.85112		0.49177	0.00183		0.63626	0.0014
0.46552	0.52224		0.49165	2.31249		0.49207	0.00178		0.63725	0.0014
0.46893	0.25016		0.48965	2.65257		0.49236	0.00174		0.63824	0.0014
0.48072	0.26761		0.53451	2.66419		0.49266	0.0017		0.63923	0.0014
0.48394	0.22715		0.49419	1.61408		0.49296	0.00166		0.64023	0.0014
0.46024	0.33645		0.47384	0.87426		0.49326	0.00162		0.64122	0.0014
0.44759	0.52366		0.49787	0.91532		0.4935	0.0016		0.64221	0.0014
0.42926	0.52102		0.4863	3.35161		0.49355	0.00159		0.6432	0.0014
0.41286	0.42291		0.50313	1.127		0.49385	0.00156		0.64419	0.0014
0.44772	2.0282		0.4819	0.59421		0.49415	0.00153		0.645	0.0014
0.46936	0.37212		0.49734	1.06719		0.49445	0.00151		0.64518	0.0014
0.45509	0.80713		0.52184	0.23039		0.49474	0.00149		0.64617	0.0014
0.46532	1.62749		0.4954	11.164		0.49504	0.00147		0.64716	0.0014
0.4726	0.35542		0.51079	0.49216		0.49534	0.00145		0.64815	0.0014
0.49272	0.24036		0.46816	5.574		0.49564	0.00143		0.64914	0.0014
0.45058	1.87563		0.48998	1.28722		0.49593	0.00141		0.65014	0.0014
0.44497	2.05363		0.50069	1.34364		0.49623	0.0014		0.65113	0.0014
0.45045	0.23768		0.48707	4.48264		0.4965	0.00139		0.65212	0.0014
0.4399	1.77698		0.40983	3.39339		0.49653	0.00139		0.65311	0.0014
0.44955	1.9952		0.4944	5.18393		0.49682	0.00138		0.6541	0.0014
0.44412	5.96866		0.47492	0.36801		0.49712	0.00136		0.655	0.0014
0.51912	0.20347		0.5066	0.70786		0.49742	0.00136		0.65509	0.0014
0.46734	1.88428		0.49252	2.27652		0.49772	0.00135		0.65608	0.0014
0.45225	1.14171		0.48847	2.23559		0.49801	0.00134		0.65707	0.0014
0.45535	0.28376		0.50619	12.0695		0.49831	0.00133		0.65806	0.0014
0.45395	1.12661		0.50874	3.3848		0.49861	0.00133		0.65905	0.0014
0.45672	0.77938		0.49636	19.9749		0.49891	0.00132		0.66005	0.0014
0.46708	0.30339		0.49795	1.53268		0.4992	0.00131		0.66104	0.0014
0.46007	0.89214		0.49705	1.88365		0.4995	0.00131		0.66203	0.0014
0.48249	0.24488		0.50787	0.43531		0.4998	0.00131		0.66302	0.0014
0.45179	0.79104		0.49535	2.45786		0.50009	0.0013		0.66401	0.0014
0.46826	0.83784		0.51424	0.20019		0.50039	0.0013		0.665	0.0014
0.45127	1.50374		0.48917	1.93315		0.50069	0.0013		0.66599	0.0014
0.46181	0.92325		0.50361	0.78637		0.50099	0.00129		0.66698	0.0014
0.45	2.8373		0.49545	2.4499		0.50128	0.00129		0.66797	0.0014
0.5699	0.35228		0.4958	2.95813		0.50158	0.00129		0.66896	0.0014
0.46505	0.62371		0.49994	0.22507		0.50188	0.00129		0.66995	0.0014
0.50619	0.21995		0.50112	0.24387		0.50218	0.00128		0.67095	0.0014
0.44638	0.32911		0.48278	1.37518		0.50247	0.00128		0.67194	0.0014
0.45342	0.63106		0.68046	0.20539		0.5025	0.00128		0.67293	0.0014
0.45695	0.48251		0.49317	0.67936		0.50277	0.00128		0.67392	0.0014
0.42402	1.46836		0.49042	2.60398		0.50307	0.00128		0.67491	0.0014
0.45167	1.59485		0.49712	1.11343		0.50336	0.00128		0.675	0.0014
0.46117	0.48048		0.48999	1.85561		0.50366	0.00128		0.6759	0.0014
0.46802	0.37126		0.51525	0.21443		0.50396	0.00128		0.67689	0.0014
0.43079	0.82764		0.48353	1.2437		0.50426	0.00128		0.67788	0.0014
0.45229	3.05149		0.49505	7.04981		0.50455	0.00128		0.67887	0.0014
0.46084	0.48792		0.49662	1.38908		0.50485	0.00127		0.67986	0.0014
0.45262	0.55376		0.39478	0.714		0.50515	0.00127		0.68086	0.0014
0.45053	0.90299		0.48174	17.4161		0.50545	0.00127		0.68185	0.0014
0.48235	0.24319		0.48604	4.51206		0.5055	0.00127		0.68284	0.0014
0.45128	0.59971		0.4915	3.84246		0.50574	0.00127		0.68383	0.0014
0.45748	0.37275		0.48413	2.66574		0.50604	0.00127		0.68482	0.0014
0.43367	0.56001		0.49829	2.24184		0.50634	0.00127		0.685	0.0014
0.45059	0.2448		0.4734	0.29641		0.50664	0.00127		0.68581	0.0014
0.45909	1.78374		0.49635	0.29019		0.50693	0.00127		0.6868	0.0014
0.45542	1.20039		0.47862	0.39042		0.50723	0.00127		0.68779	0.0014
0.45344	1.19379		0.50023	1.7544		0.50753	0.00127		0.68878	0.0014
0.47789	0.36721		0.4977	0.88534		0.50782	0.00127		0.68977	0.0014
0.47392	0.24276		0.49651	1.03274		0.50812	0.00127		0.69077	0.0014
0.48278	0.2469		0.48744	1.88819		0.50842	0.00127		0.69176	0.0014
0.45791	0.57231		0.50871	0.73557		0.5085	0.00127		0.69275	0.0014
0.4504	1.6149		0.49783	0.40536		0.50872	0.00127		0.69374	0.0014
0.45253	1.68635		0.48935	1.11532		0.50901	0.00127		0.69473	0.0014
0.45812	4.11973		0.4821	1.78328		0.50931	0.00127		0.695	0.0014
0.45899	1.16995		0.52477	1.17397		0.50961	0.00127		0.69572	0.0014
0.46431	1.12159		0.48554	2.21209		0.50991	0.00127		0.69671	0.0014
0.43168	2.08863		0.49011	4.13872		0.5102	0.00127		0.6977	0.0014
0.38402	0.91534		0.49244	0.79802		0.5105	0.00127		0.69869	0.0014
0.4575	0.72583		0.45581	1.0583		0.5108	0.00127		0.69968	0.0014
0.46357	0.31699		0.49892	1.16716		0.51109	0.00127		0.70068	0.0014
0.49453	0.23753		0.47848	1.03596		0.51139	0.00127		0.70167	0.0014
0.4342	0.22375		0.50013	1.02824		0.5115	0.00127		0.70266	0.0014
0.46817	0.27209		0.49667	2.50712		0.51169	0.00127		0.70365	0.0014
0.43727	1.76904		0.48788	2.11172		0.51199	0.00127		0.70464	0.0014
0.45844	1.15393		0.49264	1.81254		0.51228	0.00127		0.705	0.0014
0.4583	0.41697		0.53038	0.23242		0.51258	0.00127		0.70563	0.0014
0.45352	0.90653		0.48887	3.03238		0.51288	0.00127		0.70662	0.0014
0.45815	0.45881		0.49526	1.15485		0.51318	0.00127		0.70761	0.0014
0.4395	0.71486		0.497	0.898		0.51347	0.00127		0.7086	0.0014
0.55324	0.23869		0.47915	3.14986		0.51377	0.00127		0.70959	0.0014
0.45543	1.57159		0.48747	3.21444		0.51407	0.00127		0.71059	0.0014
0.46613	0.53554		0.48904	3.66283		0.51436	0.00127		0.71158	0.0014
0.46732	0.39412		0.48536	2.22457		0.5145	0.00127		0.71257	0.0014
0.48022	0.22671		0.49392	0.93802		0.51466	0.00127		0.71356	0.0014
0.45207	0.55327		0.49082	1.49946		0.51496	0.00127		0.71455	0.0014
0.45875	1.01115		0.49191	1.19184		0.51526	0.00127		0.715	0.0014
0.47067	0.70731		0.4921	2.0228		0.51555	0.00127		0.71554	0.0014
0.44278	0.69454		0.49827	0.82754		0.51585	0.00127		0.71653	0.0014
0.4536	1.66366		0.48166	0.42646		0.51615	0.00127		0.71752	0.0014
0.4475	1.52828		0.49571	0.69874		0.51645	0.00127		0.71851	0.0014
0.42867	0.32965		0.49461	1.74535		0.51674	0.00127		0.7195	0.0014
0.45852	1.57654		0.49824	1.30819		0.51704	0.00127		0.7205	0.0014
0.4774	0.20653		0.51031	0.25625		0.51734	0.00127		0.72149	0.0014
0.47717	0.33995		0.49777	0.49943		0.5175	0.00127		0.72248	0.0014
0.46837	0.28731		0.48529	2.91146		0.51764	0.00127		0.72347	0.0014
0.4284	0.62762		0.48969	0.40114		0.51793	0.00127		0.72446	0.0014
0.44988	0.75556		0.4622	2.29065		0.51823	0.00127		0.725	0.0014
0.45147	0.27556		0.49542	0.24705		0.51853	0.00127		0.72545	0.0014
0.43588	0.82415		0.49904	2.21026		0.51882	0.00127		0.72644	0.0014
0.43888	0.9402		0.48897	1.20709		0.51912	0.00127		0.72743	0.0014
0.45242	0.47424		0.48864	0.59176		0.51942	0.00127		0.72842	0.0014
0.43075	0.69894		0.47958	5.13048		0.51972	0.00127		0.72941	0.0014
0.43949	0.2698		0.49573	0.49464		0.52001	0.00127		0.73041	0.0014
0.48191	0.74435		0.49061	1.00224		0.52031	0.00127		0.7314	0.0014
0.45117	2.15041		0.50515	2.86622		0.5205	0.00127		0.73239	0.0014
0.48508	0.28604		0.49777	0.69016		0.52061	0.00127		0.73338	0.0014
0.43531	1.13795		0.48071	1.48659		0.52091	0.00127		0.73437	0.0014
0.4631	0.62309		0.50289	0.68672		0.5212	0.00127		0.735	0.0014
0.48052	0.20975		0.50974	0.56789		0.5215	0.00127		0.73536	0.0014
0.46024	0.31764		0.48562	5.54665		0.5218	0.00127		0.73635	0.0014
0.4883	0.2787		0.49177	3.80272		0.52209	0.00127		0.73734	0.0014
0.46015	0.68301		0.49227	0.51248		0.52239	0.00127		0.73833	0.0014
0.47232	0.33563		0.50301	0.704		0.52269	0.00127		0.73932	0.0014
0.4562	0.77014		0.49158	1.36447		0.52299	0.00127		0.74032	0.0014
0.43293	0.81427		0.53404	0.2223		0.52328	0.00127		0.74131	0.0014
0.44777	0.67846		0.41126	0.31015		0.5235	0.00127		0.7423	0.0014
0.44921	1.86594		0.50733	0.44246		0.52358	0.00127		0.74329	0.0014
0.44805	1.11439		0.49173	1.50542		0.52388	0.00127		0.74428	0.0014
0.45403	0.57413		0.47831	1.74366		0.52418	0.00127		0.745	0.0014
0.46587	1.22751		0.47898	1.30537		0.52447	0.00127		0.74527	0.0014
0.45498	1.0131		0.4829	1.03751		0.52477	0.00127		0.74626	0.0014
0.45551	2.83779		0.50765	0.90513		0.52507	0.00127		0.74725	0.0014
0.44712	1.39648		0.48929	6.16548		0.52536	0.00127		0.74824	0.0014
0.45004	0.82363		0.49152	3.98268		0.52566	0.00127		0.74923	0.0014
0.47871	0.20125		0.50392	0.23784		0.52596	0.00127		0.75023	0.0014
0.45403	1.60676		0.49666	3.62517		0.52626	0.00127		0.75122	0.0014
0.46103	0.38709		0.50256	1.62865		0.5265	0.00127		0.75221	0.0014
0.44643	2.22309		0.49936	0.55936		0.52655	0.00127		0.7532	0.0014
0.46702	0.55244		0.51158	0.45121		0.52685	0.00127		0.75419	0.0014
0.45843	1.68312		0.47983	1.53058		0.52715	0.00127		0.755	0.0014
0.44708	0.39512		0.48275	0.94439		0.52745	0.00127		0.75518	0.0014
0.45713	1.27573		0.5083	0.47375		0.52774	0.00127		0.75617	0.0014
0.44685	0.38618		0.63398	0.46248		0.52804	0.00127		0.75716	0.0014
0.46089	1.15161		0.49316	8.65216		0.52834	0.00127		0.75815	0.0014
0.45951	0.48204		0.48469	3.57123		0.52864	0.00127		0.75914	0.0014
0.4677	0.72375		0.47384	7.35812		0.52893	0.00127		0.76014	0.0014
0.452	1.74283		0.48098	5.01191		0.52923	0.00127		0.76113	0.0014
0.46684	0.56839		0.51818	0.48672		0.5295	0.00127		0.76212	0.0014
0.4556	0.79663		0.49008	1.74849		0.52953	0.00127		0.76311	0.0014
0.46312	0.59899		0.50849	0.41427		0.52982	0.00127		0.7641	0.0014
0.44492	0.59577		0.49912	0.51799		0.53012	0.00127		0.765	0.0014
0.48351	0.3761		0.48182	0.8972		0.53042	0.00127		0.76509	0.0014
0.47687	0.37037		0.49507	0.45382		0.53072	0.00127		0.76608	0.0014
0.44385	0.73395		0.49948	1.44691		0.53101	0.00127		0.76707	0.0014
0.4528	2.36602		0.48487	2.02033		0.53131	0.00127		0.76806	0.0014
0.46379	0.97961		0.49164	0.81528		0.53161	0.00127		0.76905	0.0014
0.44331	0.891		0.48694	2.23276		0.53191	0.00127		0.77005	0.0014
0.4846	0.29069		0.49583	2.78993		0.5322	0.00127		0.77104	0.0014
0.45482	0.34648		0.48386	5.41468		0.5325	0.00127		0.77203	0.0014
0.44524	1.27209		0.48033	6.07275		0.5328	0.00127		0.77302	0.0014
0.46106	0.63719		0.50203	1.45471		0.53309	0.00127		0.77401	0.0014
0.44656	1.62094		0.48622	1.81213		0.53339	0.00127		0.775	0.0014
0.45442	1.68579		0.62658	0.20428		0.53369	0.00127		0.77599	0.0014
0.4394	0.55054		0.49609	0.58282		0.53399	0.00127		0.77698	0.0014
0.45133	1.71525		0.66462	0.54568		0.53428	0.00127		0.77797	0.0014
0.44874	2.23027		0.47977	0.80849		0.53458	0.00127		0.77896	0.0014
0.4508	0.36812		0.49362	1.39065		0.53488	0.00127		0.77995	0.0014
0.47745	0.42947		0.493	2.63478		0.53518	0.00127		0.78095	0.0014
0.4709	0.77813		0.50539	0.30951		0.53547	0.00127		0.78194	0.0014
0.45532	0.34584		0.59575	3.13031		0.5355	0.00127		0.78293	0.0014
0.45854	1.23829		0.49838	0.26792		0.53577	0.00127		0.78392	0.0014
0.45517	0.37439		0.48013	4.23532		0.53607	0.00127		0.78491	0.0014
0.46931	0.34679		0.18946	0.23513		0.53636	0.00127		0.785	0.0014
0.45391	0.67376		0.49082	1.08058		0.53666	0.00127		0.7859	0.0014
0.47215	0.34907		0.50319	0.67818		0.53696	0.00127		0.78689	0.0014
0.45066	1.94193		0.48417	1.16277		0.53726	0.00127		0.78788	0.0014
0.43491	0.46149		0.49976	1.28681		0.53755	0.00127		0.78887	0.0014
0.63702	0.24663		0.46491	1.42671		0.53785	0.00127		0.78986	0.0014
0.41404	0.26952		0.4955	7.91669		0.53815	0.00127		0.79086	0.0014
0.44994	0.92309		0.50263	1.70892		0.53845	0.00127		0.79185	0.0014
0.45884	0.98822		0.49601	1.43456		0.5385	0.00127		0.79284	0.0014
0.44079	1.47366		0.48877	2.99089		0.53874	0.00127		0.79383	0.0014
0.44241	2.33779		0.49573	1.12034		0.53904	0.00127		0.79482	0.0014
0.44714	1.11614		0.48659	1.62222		0.53934	0.00127		0.795	0.0014
0.45307	1.40548		0.48257	2.83455		0.53964	0.00127		0.79581	0.0014
0.44868	1.08353		0.49355	3.15376		0.53993	0.00127		0.7968	0.0014
0.42631	0.35082		0.49466	2.98003		0.54023	0.00127		0.79779	0.0014
0.45063	1.86016		0.48839	4.1651		0.54053	0.00127		0.79878	0.0014
0.41608	1.8624		0.49434	1.29569		0.54082	0.00127		0.79977	0.0014
0.42887	0.6676		0.48553	0.4993		0.54112	0.00127		0.80077	0.0014
0.45509	1.16028		0.49444	0.76528		0.54142	0.00127		0.80176	0.0014
0.4528	0.76712		0.52109	0.2755		0.5415	0.00127		0.80275	0.0014
0.44424	1.55188		0.49543	0.80332		0.54172	0.00127		0.80374	0.0014
0.45058	1.13159		0.48881	1.45892		0.54201	0.00127		0.80473	0.0014
0.44541	1.47591		0.48738	6.77246		0.54231	0.00127		0.805	0.0014
0.44069	1.43757		0.50266	0.66514		0.54261	0.00127		0.80572	0.0014
0.44738	1.89484		0.49712	0.97549		0.54291	0.00127		0.80671	0.0014
0.44456	0.6042		0.50204	0.23042		0.5432	0.00127		0.8077	0.0014
0.45884	0.79521		0.49176	1.36358		0.5435	0.00127		0.80869	0.0014
0.50339	0.25033		0.48727	3.16048		0.5438	0.00127		0.80968	0.0014
0.4388	0.3802		0.47509	0.50184		0.54409	0.00127		0.81068	0.0014
0.44217	2.55028		0.49144	2.58162		0.54439	0.00127		0.81167	0.0014
0.45536	0.80224		0.48304	0.37503		0.5445	0.00127		0.81266	0.0014
0.46627	1.68371		0.49755	4.12665		0.54469	0.00127		0.81365	0.0014
0.45826	0.69479		0.48556	1.65709		0.54499	0.00127		0.81464	0.0014
0.44474	1.64781		0.47616	13.9082		0.54528	0.00127		0.815	0.0014
0.44849	0.92159		0.50015	0.3777		0.54558	0.00127		0.81563	0.0014
0.3983	0.20265		0.49425	3.6463		0.54588	0.00127		0.81662	0.0014
0.44596	1.03176		0.48508	0.49126		0.54618	0.00127		0.81761	0.0014
0.46028	0.48882		0.49396	1.36999		0.54647	0.00127		0.8186	0.0014
0.4481	1.87118		0.4959	1.99532		0.54677	0.00127		0.81959	0.0014
0.45182	0.85495		0.49127	0.26695		0.54707	0.00127		0.82059	0.0014
0.45297	0.51873		0.49213	2.83367		0.54736	0.00127		0.82158	0.0014
0.45313	0.92216		0.50938	1.55533		0.5475	0.00127		0.82257	0.0014
0.46924	1.29346		0.50795	1.35713		0.54766	0.00127		0.82356	0.0014
0.46191	1.49983		0.49551	2.74118		0.54796	0.00127		0.82455	0.0014
0.50115	0.25053		0.4932	0.24866		0.54826	0.00127		0.825	0.0014
0.46949	2.12659		0.49967	0.81865		0.54855	0.00127		0.82554	0.0014
0.44637	1.49461		0.49999	0.9868		0.54885	0.00127		0.82653	0.0014
0.45622	0.48752		0.47978	2.84245		0.54915	0.00127		0.82752	0.0014
0.45241	1.01221		0.49213	0.97946		0.54945	0.00127		0.82851	0.0014
0.463	0.86254		0.4858	0.77405		0.54974	0.00127		0.8295	0.0014
0.4404	0.49931		0.49409	1.5949		0.55004	0.00127		0.8305	0.0014
0.43758	1.68339		0.4927	0.52749		0.55034	0.00127		0.83149	0.0014
0.46246	0.49718		0.48771	1.68196		0.5505	0.00127		0.83248	0.0014
0.47234	0.26148		0.54339	0.30606		0.55064	0.00127		0.83347	0.0014
0.45243	2.74265		0.49277	1.97136		0.55093	0.00127		0.83446	0.0014
0.48055	0.33086		0.48588	4.30449		0.55123	0.00127		0.835	0.0014
0.44082	1.41898		0.51144	0.2748		0.55153	0.00127		0.83545	0.0014
0.45214	0.61661		0.4924	0.62257		0.55182	0.00127		0.83644	0.0014
0.44571	0.55142		0.48848	0.48342		0.55212	0.00127		0.83743	0.0014
0.45046	2.69505		0.48856	1.60947		0.55242	0.00127		0.83842	0.0014
0.45519	0.36983		0.48541	3.77151		0.55272	0.00127		0.83941	0.0014
0.46186	0.59545		0.48524	3.00471		0.55301	0.00127		0.84041	0.0014
0.44715	2.25793		0.48261	1.54901		0.55331	0.00127		0.8414	0.0014
0.45454	1.43391		0.48599	1.54404		0.5535	0.00127		0.84239	0.0014
0.4531	4.50569		0.47708	1.58542		0.55361	0.00127		0.84338	0.0014
0.45248	0.35498		0.49484	0.74515		0.55391	0.00127		0.84437	0.0014
0.4495	0.51322		0.49652	1.25601		0.5542	0.00127		0.845	0.0014
0.45851	0.79045		0.49495	0.43038		0.5545	0.00127		0.84536	0.0014
0.43963	0.46103		0.5336	0.20978		0.5548	0.00127		0.84635	0.0014
0.44505	1.05192		0.49406	2.60034		0.55509	0.00127		0.84734	0.0014
0.45667	1.25132		0.49416	3.76286		0.55539	0.00127		0.84833	0.0014
0.46132	0.41005		0.48838	1.63377		0.55569	0.00127		0.84932	0.0014
0.45223	1.0239		0.48561	4.46519		0.55599	0.00127		0.85032	0.0014
0.4926	0.59847		0.51882	0.58088		0.55628	0.00127		0.85131	0.0014
0.44489	0.57868		0.48981	5.93826		0.5565	0.00127		0.8523	0.0014
0.46352	0.5209		0.49398	4.41683		0.55658	0.00127		0.85329	0.0014
0.44978	0.28308		0.48562	2.7536		0.55688	0.00127		0.85428	0.0014
0.46705	0.38354		0.49477	0.87005		0.55718	0.00127		0.855	0.0014
0.45451	1.40087		0.48523	3.22982		0.55747	0.00127		0.85527	0.0014
0.45366	0.31054		0.51186	5.89143		0.55777	0.00127		0.85626	0.0014
0.44352	1.43432		0.49915	0.80291		0.55807	0.00127		0.85725	0.0014
0.46732	0.84732		0.49594	1.5676		0.55836	0.00127		0.85824	0.0014
0.48708	0.3219		0.50959	1.32994		0.55866	0.00127		0.85923	0.0014
0.45559	1.14395		0.48616	2.37047		0.55896	0.00127		0.86023	0.0014
0.47322	0.28359		0.49242	4.9705		0.55926	0.00127		0.86122	0.0014
0.45725	1.21214		0.60212	0.25993		0.5595	0.00127		0.86221	0.0014
0.45438	2.1462		0.5757	6.00238		0.55955	0.00127		0.8632	0.0014
0.44849	1.07983		0.50195	1.22024		0.55985	0.00127		0.86419	0.0014
0.45568	1.09584		0.51308	0.36301		0.56015	0.00127		0.865	0.0014
0.4647	0.47883		0.49286	2.03392		0.56045	0.00127		0.86518	0.0014
0.45208	2.70099		0.50419	2.16727		0.56074	0.00127		0.86617	0.0014
0.4557	0.52223		0.49439	1.53538		0.56104	0.00127		0.86716	0.0014
0.45548	0.22169		0.49384	1.23216		0.56134	0.00127		0.86815	0.0014
0.46679	1.0762		0.4999	1.49693		0.56164	0.00127		0.86914	0.0014
0.44337	1.52961		0.49232	0.52608		0.56193	0.00127		0.87014	0.0014
0.46475	0.38534		0.47826	1.87543		0.56223	0.00127		0.87113	0.0014
0.42128	0.23056		0.51458	0.43967		0.5625	0.00127		0.87212	0.0014
0.47096	0.44763		0.47666	2.88001		0.56253	0.00127		0.87311	0.0014
0.46213	0.55243		0.497	0.77391		0.56282	0.00127		0.8741	0.0014
0.45398	1.6465		0.5004	1.18263		0.56312	0.00127		0.875	0.0014
0.4473	0.96322		0.48882	0.39056		0.56342	0.00127		0.87509	0.0014
0.46675	0.59665		0.49183	3.52992		0.56372	0.00127		0.87608	0.0014
0.46814	0.5245		0.52629	0.44422		0.56401	0.00127		0.87707	0.0014
0.45978	0.44915		0.49831	2.15715		0.56431	0.00127		0.87806	0.0014
0.46669	0.83953		0.50378	0.4233		0.56461	0.00127		0.87905	0.0014
0.43103	0.93002		0.49717	1.22201		0.56491	0.00127		0.88005	0.0014
0.45827	1.2313		0.49361	1.46333		0.5652	0.00127		0.88104	0.0014
0.46183	1.06763		0.49473	1.55383		0.5655	0.00127		0.88203	0.0014
0.68721	0.41198		0.48848	0.49438		0.5658	0.00127		0.88302	0.0014
0.46431	0.79838		0.50564	0.31301		0.56609	0.00127		0.88401	0.0014
0.44885	1.48097		0.49592	9.21465		0.56639	0.00127		0.885	0.0014
0.45657	1.00183		0.47574	6.05505		0.56669	0.00127		0.885	0.0014
0.42869	0.78559		0.50972	0.33536		0.56699	0.00127		0.88599	0.0014
0.45978	0.77818		0.48754	0.88278		0.56728	0.00127		0.88698	0.0014
0.46382	0.9608		0.49354	1.96732		0.56758	0.00127		0.88797	0.0014
0.4513	2.18873		0.49523	1.00124		0.56788	0.00127		0.88896	0.0014
0.49148	1.30606		0.48363	5.26514		0.56818	0.00127		0.88995	0.0014
0.4514	1.15587		0.50547	0.56111		0.56847	0.00127		0.89095	0.0014
0.45025	1.62282		0.49203	2.5788		0.5685	0.00127		0.89194	0.0014
0.44027	0.66944		0.48979	1.36421		0.56877	0.00127		0.89293	0.0014
0.46113	0.63844		0.47538	1.5467		0.56907	0.00127		0.89392	0.0014
0.4501	0.27031		0.49074	1.87075		0.56936	0.00127		0.89491	0.0014
0.44458	1.06286		0.49077	0.56728		0.56966	0.00127		0.895	0.0014
0.45651	4.26637		0.49777	1.21101		0.56996	0.00127		0.8959	0.0014
0.49742	1.93708		0.49226	2.21911		0.57026	0.00127		0.89689	0.0014
0.45814	0.30735		0.49958	4.05793		0.57055	0.00127		0.89788	0.0014
0.46448	0.94273		0.48871	4.34442		0.57085	0.00127		0.89887	0.0014
0.45555	0.79142		0.50802	1.59487		0.57115	0.00127		0.89986	0.0014
0.44546	1.32438		0.49487	2.56624		0.57145	0.00127		0.90086	0.0014
0.45333	1.84341		0.48893	0.36798		0.5715	0.00127		0.90185	0.0014
0.44519	1.00389		0.50101	0.65914		0.57174	0.00127		0.905	0.0014
0.42935	0.27683		0.4816	4.78292		0.5745	0.00127		0.915	0.0014
0.50365	0.37487		0.36072	0.35019		0.5775	0.00127		0.925	0.0014
0.45458	1.45148		0.42027	0.61369		0.5805	0.00127		0.935	0.0014
0.46252	0.27821		0.5033	0.64116		0.5835	0.00127		0.945	0.0014
0.46888	0.57868		0.49895	1.27417		0.5865	0.00127		0.955	0.0014
0.46186	2.30093		0.49053	4.35731		0.5895	0.00127		0.965	0.0014
0.45796	0.33007		0.49513	1.73208		0.5925	0.00127		0.975	0.0014
0.46135	2.04078		0.48791	1.59169		0.5955	0.00127		0.985	0.0014
0.45476	0.87531		0.48511	1.86568		0.5985	0.00127		0.995	0.0014
0.44404	0.3943		0.48222	3.69917
0.44273	1.37976		0.48702	1.92657
0.44798	1.91763		0.48633	3.13884
0.46631	0.36984		0.48917	10.0983
0.45146	0.54537		0.49349	0.75504
0.49208	0.33075		0.49469	0.84992
0.44828	0.2977		0.4895	7.69162
0.4534	1.41891		0.48028	9.30742
0.45968	0.75788		0.49753	0.54895
0.44779	1.60257		0.49583	1.12657
0.45292	1.0149		0.48984	1.06708
0.44956	0.33149		0.50782	0.85521
0.45492	0.41393		0.49506	1.47132
0.4755	0.37608		0.23488	0.41432
0.44437	0.71502		0.50048	1.11764
0.46646	0.78481		0.48926	2.54663
0.46264	0.8931		0.49871	2.28064
0.4586	1.12766		0.49774	1.30754
0.40722	0.68412		0.49538	3.6232
0.46431	0.86409		0.49666	0.42936
0.45558	1.11639		0.47677	0.61233
0.45521	0.48664		0.49476	1.2583
0.45533	0.99847		0.48586	0.56312
0.44681	1.70818		0.4941	1.83057
0.45453	0.97964		0.48535	1.01028
0.47781	0.28777		0.55158	1.45112
0.43677	1.08171		0.47689	0.5618
0.45415	0.53333		0.51335	0.76322
0.45546	0.69662		0.49097	0.46664
0.43781	0.50081		0.48622	1.75558
0.45928	1.084		0.49493	2.72698
0.44771	0.46268		0.49976	0.78609
0.49276	0.20201		0.38414	1.81927
0.45097	0.89982		0.50174	1.02161
0.43225	2.20859		0.48439	2.73548
0.45769	2.08371		0.48967	1.51795
0.4718	0.51112		0.48108	3.58093
0.4775	0.43162		0.44786	0.22067
0.45612	0.51367		0.47697	1.97104
0.44089	0.34183		0.49998	0.74956
0.46926	0.34426		0.49534	0.23885
0.45197	0.40625		0.49569	3.52743
0.21768	0.43852		0.50511	0.49264
0.51085	0.35043		0.50041	0.73837
0.45343	1.07064		0.49019	0.84732
0.49469	0.23046		0.48751	3.16451
0.44652	0.46031		0.493	6.23875
0.45594	0.2184		0.49533	0.65022
0.46827	0.34199		0.52786	6.09301
0.46713	0.72195		0.49228	0.55404
0.48641	0.2228		0.49356	1.09945
0.46453	0.78953		0.53594	0.20295
0.44357	0.52615		0.49668	1.23449
0.46345	0.30675		0.48087	3.6291
0.45902	0.73726		0.49752	2.03873
0.4413	1.80228		0.48673	0.56862
0.43749	0.85897		0.49532	1.12606
0.44963	0.22554		0.5013	1.94306
0.4534	0.78621		0.49317	3.17856
0.44347	2.24376		0.48687	0.30274
0.44203	0.22706		0.49257	0.6439
0.43592	0.47883		0.48978	5.89918
0.44622	1.0849		0.49716	1.18302
0.44611	2.29091		0.48756	0.66298
0.47079	0.90006		0.47266	10.7622
0.45013	1.26547		0.47126	4.65601
0.43901	0.56266		0.48708	0.4781
0.45702	2.45093		0.48859	0.41385
0.45764	0.31474		0.49882	0.45452
0.46763	1.3171		0.48531	0.9938
0.4601	0.37471		0.48127	2.3345
0.4563	1.04803		0.49746	7.47637
0.4372	1.41977		0.48722	0.69274
0.44369	0.51389		0.49225	6.42944
0.44715	1.18867		0.49461	1.84712
0.44971	1.03029		0.48347	2.78531
0.4488	1.7098		0.49878	0.5362
0.47425	0.26646		0.48813	21.383
0.44805	2.78089		0.48838	8.8838
0.44373	0.84859		0.49145	2.21975
0.47341	0.32209		0.48677	1.97463
0.49445	0.60506		0.48453	2.63935
0.44344	1.78993		0.49241	3.0494
0.46812	0.23766		0.49053	0.40629
0.44717	1.31138		0.48469	2.07701
0.44987	0.2821		0.49841	3.43852
0.47473	0.24222		0.49919	1.46356
0.44594	0.71868		0.50703	0.34247
0.45014	0.25494		0.51417	0.31481
0.46935	1.6808		0.49648	0.87109
0.46041	0.85236		0.48739	3.83469
0.48742	0.2631		0.49527	1.72552
0.456	1.34405		0.48354	1.16854
0.45107	3.24617		0.49921	1.88006
0.46297	1.42194		0.50199	3.44399
0.47092	0.24313		0.48601	2.91461
0.45167	0.21063		0.49553	1.14261
0.41337	0.71525		0.49962	0.65274
0.45689	1.77079		0.49146	5.96671
0.43458	1.37659		0.48471	5.70731
0.46402	0.88565		0.48918	5.30421
0.4525	1.38828		0.48705	0.25005
0.4958	0.23524		0.48493	2.12716
0.44357	0.62935		0.48063	0.72164
0.43223	0.33026		0.48424	5.18248
0.4596	1.98605		0.48821	1.42856
0.45377	0.74797		0.4837	1.59127
0.45254	0.63456		0.48443	0.77917
0.44929	1.55542		0.50064	0.93645
0.44707	1.69714		0.49682	1.26705
0.44516	0.97116		0.49391	1.23815
0.46643	0.61433		0.49561	7.47292
0.47301	0.24326		0.48825	6.28819
0.48841	0.77593		0.51435	0.29846
0.45927	0.29867		0.49864	2.64478
0.45498	0.41021		0.46834	1.03347
0.4506	0.4268		0.49515	0.91741
0.46732	0.29557		0.49292	2.18752
0.48572	0.22645		0.5059	0.35103
0.45179	1.10147		0.49664	2.49492
0.45713	2.38225		0.48842	3.06708
0.4645	0.81494		0.48811	2.03559
0.45632	0.66508		0.48918	0.95055
0.4511	2.29659		0.49987	2.13885
0.45147	0.7972		0.49112	0.93481
0.46428	0.40468		0.49727	0.92712
0.45821	0.3138		0.49057	3.70754
0.47079	0.7007		0.48482	4.62081
0.44059	1.2358		0.49112	9.5547
0.46052	1.12727		0.49639	1.12235
0.42538	0.72708		0.48898	1.41152
0.45775	1.52283		0.48989	3.20543
0.41564	0.30905		0.49402	1.58675
0.45471	0.43564		0.49879	1.74725
0.43941	1.01197		0.48956	1.2083
0.44599	0.21843		0.48828	6.6067
0.45504	1.52023		0.48555	4.97792
0.45785	0.63805		0.47876	0.47118
0.47181	0.29566		0.45452	1.31402
0.44998	1.62257		0.48788	3.93076
0.45344	1.34587		0.48869	1.88274
0.45623	1.25125		0.50811	0.24801
0.45324	1.35185		0.48037	2.08595
0.45776	0.70561		0.50178	2.79342
0.44525	1.42804		0.50142	1.75223
0.45397	0.62309		0.48423	0.34516
0.45448	2.05633		0.48898	1.78013
0.44942	1.27488		0.48923	0.85555
0.45064	1.26431		0.49163	2.94493
0.45242	1.57424		0.49823	0.78754
0.43707	1.30412		0.49637	1.20868
0.45874	2.01227		0.49654	0.84274
0.45226	1.32605		0.48984	0.67761
0.45019	1.21614		0.50003	1.03904
0.43906	0.5872		0.49057	2.99848
0.4702	0.51043		0.51085	0.23784
0.25242	0.38339		0.41978	19.0697
0.44928	1.12348		0.48613	0.44288
0.47687	0.35017		0.47959	1.12468
0.44625	0.48827		0.48889	6.50592
0.44709	0.57363		0.49328	1.57779
0.45804	0.66052		0.49613	1.37567
0.45262	1.10156		0.49067	1.13593
0.45232	0.72901		0.4893	0.67931
0.46216	0.46513		0.48643	8.65647
0.45209	2.12377		0.55516	1.5237
0.45391	0.7393		0.49344	1.58399
0.44404	2.39097		0.48819	3.01598
0.45072	1.84274		0.48001	1.0664
0.47677	0.20262		0.49876	0.3665
0.45659	0.68631		0.51182	0.3348
0.45676	0.98833		0.50084	2.88583
0.44734	1.94751		0.50009	0.80567
0.44843	0.54593		0.48454	2.78296
0.46072	1.04388		0.4956	0.79444
0.40062	2.59363		0.49568	5.50232
0.45161	0.95016		0.48751	4.52531
0.48521	0.29574		0.47889	10.1314
0.46202	2.31555		0.48903	0.84001
0.37484	0.45149		0.48915	1.11365
0.43772	1.12272		0.48512	2.0654
0.47523	0.2224		0.48897	5.97923
0.45995	0.878		0.49956	1.51343
0.44904	1.12477		0.48497	2.95186
0.56642	0.5033		0.49153	3.53996
0.44321	2.12618		0.50282	1.02321
0.46923	0.40369		0.48756	4.73682
0.45668	0.78177		0.48846	4.75978
0.45273	0.34741		0.48744	1.55846
0.4437	0.85244		0.49008	0.76324
0.45698	0.52805		0.48554	18.9501
0.45162	2.1673		0.48293	2.64018
0.48092	0.40913		0.4858	7.36962
0.45878	3.02508		0.48816	4.93425
0.45279	0.74746		0.52558	4.45896
0.46247	0.38279		0.53225	0.23441
0.47515	0.25034		0.4901	2.57588
0.44538	1.17928		0.50901	0.36321
0.43332	0.93931		0.49059	4.15067
0.45235	4.15253		0.49918	6.81018
0.44719	0.82305		0.49498	0.29559
0.44304	2.02559		0.52907	0.6745
0.46965	0.51704		0.49413	0.74239
0.45702	0.7665		0.46606	4.64461
0.4521	0.21811		0.61456	0.87848
0.4759	0.24126		0.49724	0.96802
0.4829	0.22535		0.4916	1.24746
0.45426	1.24129		0.39754	1.61925
0.45833	0.79985		0.50413	4.21612
0.44412	1.39797		0.49192	4.49812
0.44168	1.04062		0.60348	0.36643
0.458	0.34993		0.48285	4.7602
0.43964	0.52671		0.50554	0.29729
0.45777	1.03805		0.4875	1.78992
0.50325	0.58231		0.50148	0.43567
0.45494	1.34459		0.48967	0.93997
0.44151	0.78283		0.5006	0.31099
0.60072	1.80859		0.48354	1.68497
0.4558	1.6746		0.49086	3.53472
0.44392	6.03823		0.49595	1.51017
0.4478	2.6311		0.57398	3.20457
0.44858	1.36884		0.48464	2.27182
0.43371	1.29877		0.48918	1.94034
0.46948	0.63094		0.50455	0.30607
0.45649	1.41268		0.49128	0.93009
0.45095	1.8532		0.48915	5.18974
0.46597	0.71532		0.48961	3.09981
0.46579	0.62692		0.50056	1.05388
0.46232	0.27037		0.48745	0.51051
0.4511	0.65604		0.49863	3.05944
0.4587	0.74397		0.48342	5.92378
0.45597	0.87795		0.51483	0.20124
0.47373	0.29437		0.49556	2.67013
0.44558	0.30972		0.48785	2.88797
0.45472	1.19802		0.49073	1.47094
0.45711	0.92391		0.50241	1.00634
0.45654	0.71051		0.49127	1.63989
0.47511	0.37529		0.50021	3.04743
0.46877	0.35758		0.50098	0.78687
0.45975	0.71		0.49271	2.14757
0.44385	1.31254		0.48456	2.73806
0.4567	0.63864		0.47412	0.3569
0.45393	1.36108		0.47176	0.2987
0.46829	0.74935		0.49732	0.35943
0.4741	0.60764		0.49796	4.00462
0.47942	0.49196		0.49231	18.2963
0.46255	0.80274		0.49627	10.9634
0.50863	0.24068		0.48429	1.46637
0.45927	0.98236		0.50833	0.67385
0.46172	0.43346		0.50047	1.79446
0.44312	1.18953		0.49211	2.37439
0.44914	1.3127		0.49439	1.88927
0.44939	0.66442		0.49513	1.30064
0.45111	1.00588		0.50259	0.53961
0.46631	1.88893		0.4871	0.33963
0.45907	1.30523		0.49096	2.20122
0.46108	1.5565		0.48943	4.68667
0.4407	0.4033		0.48694	1.46567
0.45715	0.77891		0.50015	3.57909
0.44832	1.54859		0.49999	1.25213
0.45169	0.38382		0.49298	0.48791
0.46941	0.25002		0.51246	0.76257
0.46106	0.28222		0.59608	0.43613
0.44936	0.88646		0.49144	1.00773
0.45789	1.14335		0.49719	1.20815
0.40347	0.39607		0.4926	7.79679
0.45217	1.4226		0.45104	25.0993
0.48904	0.20699		0.48857	1.45544
0.46077	0.65213		0.48904	1.7405
0.45917	1.01752		0.50192	0.6565
0.47494	0.2628		0.49036	2.1873
0.4493	0.25714		0.48415	10.5944
0.45807	1.38992		0.47877	4.12797
0.45456	0.74258		0.49344	2.19497
0.4482	0.90345		0.65956	0.22775
0.47521	0.30714		0.48583	0.8543
0.45457	0.33524		0.49112	0.98199
0.44354	4.55455		0.51627	0.39811
0.45929	1.22526		0.49071	2.76836
0.45032	0.93125		0.498	1.89087
0.46829	0.24206		0.50078	0.91313
0.4611	0.82744		0.48327	3.74158
0.45376	1.64606		0.482	0.50835
0.46789	0.24752		0.53221	0.21853
0.45502	0.97853		0.48603	0.88541
0.65706	0.38966		0.48659	1.62929
0.45696	1.61778		0.4885	3.7438
0.44836	0.57458		0.50432	1.16848
0.44424	4.44777		0.48708	3.29208
0.46205	1.28305		0.57419	0.40455
0.44448	0.41215		0.48142	1.09232
0.48224	0.38607		0.49233	1.73474
0.43854	2.95206		0.49798	0.73272
0.44058	2.20242		0.77779	0.31176
0.45786	1.14249		0.52215	0.31138
0.43241	0.54764		0.48851	2.38054
0.47727	0.27931		0.47836	2.40221
0.45245	2.50809		0.48697	1.9389
0.45081	0.92894		0.50748	0.21151
0.40017	0.21471		0.49534	0.84653
0.46155	0.95377		0.48851	2.37725
0.44577	1.07305		0.5007	2.83202
0.46231	0.56527		0.49419	0.59308
0.4609	1.01035		0.4853	0.99877
0.45766	0.47706		0.45347	3.60975
0.46117	0.30966		0.46648	4.59437
0.46071	1.38663		0.51379	0.4638
0.4463	1.69566		0.48582	1.10808
0.46102	1.10432		0.48392	1.58975
0.4523	0.41357		0.49238	2.58282
0.45764	0.55612		0.5013	5.48531
0.48473	0.33165		0.49647	1.12244
0.46866	0.3841		0.50123	0.66808
0.45274	1.07888		0.50157	2.23366
0.45088	0.585		0.5094	4.18193
0.4509	0.36687		0.50224	0.69705
0.46589	0.84215		0.48655	4.4168
0.46384	0.30178		0.48631	0.87738
0.48224	0.24977		0.50202	1.0404
0.46335	0.28643		0.49041	0.96791
0.41725	0.53282		0.49127	2.34084
0.45717	0.79405		0.49953	1.24035
0.45475	0.76316		0.4989	0.89037
0.49758	0.27362		0.49001	1.20204
0.44478	0.50584		0.49051	0.79144
0.45721	0.28422		0.49361	1.28347
0.47295	0.22553		0.48084	0.24834
0.44782	2.91446		0.48524	3.52853
0.47356	0.24615		0.48835	3.73774
0.49209	0.3198		0.47416	2.33934
0.44956	0.86601		0.48542	1.28326
0.45377	2.48945		0.49743	1.27178
0.46848	0.36399		0.51361	0.59593
0.47037	0.32701		0.49315	1.61897
0.45659	0.76116		0.49711	1.59451
0.4644	0.50555		0.48093	5.15037
0.45076	0.7931		0.48805	2.57416
0.48243	0.37158		0.49427	5.92888
0.42574	0.54822		0.46077	3.02767
0.46114	0.35048		0.49463	15.6337
0.46056	2.74792		0.49895	0.25523
0.46829	0.31463		0.45403	2.51093
0.46656	0.36419		0.51303	0.2889
0.47743	0.63035		0.49635	1.55567
0.46603	0.39805		0.38844	0.36567
0.45824	2.75928		0.3473	2.88291
0.44191	0.62409		0.49113	4.2389
0.47495	0.49137		0.38393	2.26572
0.45245	0.72597		0.48338	3.57472
0.4475	0.60679		0.49551	1.04167
0.44565	0.88731		0.50658	0.47979
0.49243	0.20576		0.50046	1.03516
0.4727	0.21465		0.50583	0.37532
0.45297	1.2557		0.49355	1.4696
0.42432	0.23266		0.50253	1.52703
0.49433	0.251		0.49209	1.12903
0.46728	0.66949		0.4855	1.68901
0.46166	0.92303		0.48893	4.13949
0.46991	0.46613		0.48065	2.04067
0.45493	3.15784		0.49551	1.0669
0.447	0.8065		0.48353	0.96771
0.46801	0.48322		0.48799	2.73449
0.48592	0.31824		0.50032	3.42857
0.44227	0.56055		0.49608	0.86768
0.49177	0.49569		0.48994	0.72614
0.46401	0.73591		0.50552	0.81793
0.4488	3.46556		0.49982	1.56665
0.45357	0.87178		0.49425	1.91587
0.46187	0.34371		0.50937	0.22965
0.44255	0.53236		0.49961	1.90493
0.44644	0.73004		0.49141	1.33765
0.47382	0.32383		0.49337	2.17437
0.4526	0.47971		0.54793	1.42348
0.41966	1.02414		0.4984	1.2156
0.45029	2.82937		0.49617	3.25848
0.46221	1.05732		0.49155	1.19883
0.46919	0.31962		0.50496	1.66678
0.45187	0.45397		0.50609	0.28143
0.46378	0.25046		0.50129	1.24202
0.46219	0.80612		0.48299	3.61994
0.4628	1.04105		0.48228	0.95629
0.43981	1.509		0.34388	0.54133
0.47142	0.77627		0.5051	0.49741
0.4803	0.22629		0.4915	1.87812
0.47091	0.30879		0.48607	0.87493
0.48323	0.28045		0.50297	1.23513
0.43051	2.78687		0.44651	2.04339
0.46209	0.42753		0.4835	3.04974
0.45461	0.60281		0.4808	10.5754
0.4557	0.26071		0.4924	2.84493
0.45811	2.8798		0.48804	6.68339
0.4444	0.38647		0.48129	5.48134
0.45941	0.77929		0.52285	0.34187
0.47172	0.34604		0.50329	0.6466
0.45648	2.24798		0.50681	0.90477
0.46563	0.33045		0.48307	1.1969
0.47077	0.47091		0.49078	1.8353
0.43444	0.29775		0.55322	0.49884
0.49754	0.22665		0.48889	8.06024
0.4956	0.24208		0.47329	0.71733
0.46233	2.23114		0.49603	0.75802
0.43779	1.27388		0.51189	0.3755
0.44647	0.8535		0.49357	2.63643
0.46566	0.90875		0.49467	1.19842
0.46042	0.93838		0.49048	0.55378
0.15663	14.9774		0.48485	3.16784
0.44659	3.50119		0.49067	4.70125
0.4754	0.24798		0.49742	2.0747
0.45143	2.07738		0.49322	2.24363
0.49655	0.20703		0.49545	1.14445
0.45366	0.63563		0.51032	0.50369
0.45767	0.47689		0.52691	5.89247
0.44186	0.47945		0.48517	6.2167
0.47553	0.95952		0.49013	0.42673
0.4459	1.25412		0.48854	2.70013
0.44922	1.55591		0.50356	0.33515
0.4524	0.75507		0.5082	0.84958
0.47274	0.42062		0.49251	1.30674
0.44798	0.3261		0.46701	28.2554
0.47127	0.70563		0.48193	1.20083
0.46354	0.87903		0.49368	1.10423
0.44145	2.01486		0.49043	4.10482
0.45554	3.38244		0.49234	1.18712
0.43513	2.03215		0.48779	3.33377
0.45408	1.55776		0.48746	2.99853
0.45483	0.52705		0.52347	0.24279
0.44394	0.93915		0.4947	8.19033
0.44841	1.41873		0.4805	2.18921
0.45218	0.50715		0.48119	0.58717
0.45763	0.81056		0.48874	0.5825
0.46475	0.28322		0.50741	0.80326
0.44632	1.10902		0.49756	0.37525
0.4581	0.9182		0.51466	0.46111
0.41414	2.51183		0.48904	1.17583
0.45258	0.91187		0.4981	1.75475
0.45301	0.82971		0.49146	0.94806
0.46163	0.34512		0.49388	1.60689
0.43635	0.86966		0.4969	0.47389
0.46747	1.0257		0.49724	1.16654
0.46448	0.33805		0.49126	1.59457
0.45737	0.77413		0.49371	0.27865
0.46888	0.36729		0.49074	0.33814
0.44582	2.20651		0.49358	0.82497
0.4672	0.49024		0.47406	0.33128
0.45399	0.57437		0.48743	3.64303
0.4495	1.45699		0.51074	0.48686
0.44907	2.11007		0.49267	4.38329
0.43402	0.35656		0.48605	3.09859
0.47382	0.30173		0.4798	9.09836
0.45296	0.46286		0.49544	1.85044
0.44689	1.10408		0.45253	6.39065
0.45261	1.21111		0.49268	3.13562
0.45214	1.02045		0.48631	1.04417
0.45585	1.04427		0.49121	4.93448
0.44818	0.8543		0.48938	6.00842
0.44916	1.41935		0.50115	1.46586
0.47074	0.32324		0.5107	0.53247
0.46552	1.99954		0.48299	0.55322
0.45881	0.52102		0.49495	0.62182
0.46201	0.84634		0.53951	0.86279
0.4614	0.61769		0.50995	0.28287
0.4544	0.52644		0.49107	1.04473
0.47197	0.54609		0.48926	2.64096
0.46672	0.24719		0.50709	0.7794
0.44772	2.04711		0.50006	1.39581
0.4302	0.23758		0.49469	1.43462
0.4608	0.51894		0.48789	5.29241
0.48366	0.23832		0.48525	0.47943
0.46687	0.67044		0.49234	2.07077
0.4426	0.78758		0.48844	3.98286
0.5081	0.25817		0.4998	2.51122
0.46314	0.83341		0.5564	0.31706
0.47257	0.40082		0.3676	4.12789
0.44226	2.00029		0.50111	1.07003
0.45081	0.59852		0.50651	0.9616
0.44755	0.27929		0.48111	1.11581
0.44539	0.61139		0.49879	1.38154
0.4495	0.62724		0.49278	1.19217
0.44433	0.27912		0.48997	3.01766
0.46061	1.85123		0.47138	0.2553
0.44823	0.4692		0.49768	0.40296
0.47484	0.22303		0.50482	1.38295
0.4516	1.19808		0.47566	0.45884
0.45791	0.30085		0.48598	3.53329
0.45951	0.91343		0.49842	1.30754
0.45563	1.76162		0.4875	4.50085
0.44631	1.24606		0.47848	6.18329
0.45451	0.49793		0.54147	0.45682
0.46393	0.78619		0.47496	5.9713
0.46885	0.41701		0.4883	0.57105
0.45996	0.24317		0.49855	1.83915
0.44662	0.62282		0.49807	1.72192
0.46185	1.05166		0.49159	0.84329
0.45248	0.8807		0.4874	4.29496
0.44304	3.33221		0.4987	2.47133
0.47436	0.27779		0.49988	0.55445
0.44607	2.53167		0.49622	1.18603
0.45863	0.79654		0.54357	0.47522
0.45515	0.54255		0.48726	12.6156
0.46544	1.65539		0.49339	2.61573
0.46953	0.50684		0.47669	9.12475
0.44875	0.48673		0.50635	1.00352
0.45558	1.26345		0.48814	0.75824
0.48178	0.50533		0.50401	0.36417
0.44241	2.22718		0.49113	1.57894
0.4601	0.21842		0.49077	0.29593
0.45592	0.4157		0.48977	2.2626
0.44509	2.32659		0.48513	3.44186
0.45969	0.65819		0.5065	0.54236
0.43507	0.45451		0.49295	1.75456
0.44629	1.39061		0.48331	1.22454
0.43611	1.78775		0.47587	0.37172
0.4982	0.21908		0.48457	2.06995
0.45273	0.70726		0.49848	0.97072
0.44673	1.23936		0.48249	1.01463
0.45053	0.80464		0.48303	5.10449
0.44082	1.3841		0.50245	2.4669
0.45697	0.84733		0.48958	3.586
0.45443	2.09631		0.48872	1.63914
0.45308	0.82778		0.47319	0.43299
0.45784	0.50796		0.48412	2.69238
0.45771	0.6401		0.49661	0.39429
0.44777	0.88687		0.61013	0.32874
0.44564	1.20679		0.48833	1.6049
0.45012	0.38123		0.50786	0.35775
0.45605	0.27471		0.50008	1.35303
0.44799	0.20744		0.4844	2.30738
0.44968	1.9689		0.49355	1.85101
0.45496	0.63875		0.48459	2.98367
0.45746	3.66701		0.48592	21.7097
0.4404	1.49336		0.49668	5.95727
0.45171	0.70623		0.61468	0.21931
0.46071	0.379		0.49563	2.51387
0.45113	1.1435		0.49796	0.61145
0.48938	0.20247		0.47951	1.47325
0.43538	0.83597		0.48545	3.67251
0.50489	0.25977		0.49502	5.90472
0.44869	1.37804		0.49594	2.32208
0.441	1.61577		0.48092	5.35155
0.45225	1.53945		0.48466	4.10818
0.471	0.23743		0.50047	1.81955
0.45954	1.82648		0.45059	2.1311
0.47497	0.31151		0.489	1.51309
0.4624	0.86692		0.48135	3.10667
0.46489	0.83518		0.49414	0.5784
0.43841	1.00881		0.47885	2.46532
0.44324	0.80757		0.49004	3.74787
0.45331	0.67329		0.50566	0.30872
0.47023	0.47916		0.48366	1.75901
0.49303	0.23154		0.50292	2.73187
0.46777	0.25645		0.48667	7.53151
0.45229	1.17945		0.50013	3.10274
0.46708	0.64918		0.48731	2.62879
0.45473	0.52193		0.49768	0.43002
0.46396	0.35461		0.48334	3.24995
0.4379	0.77826		0.48279	2.48592
0.44845	0.84369		0.48799	1.25553
0.45658	0.36036		0.41807	4.36046
0.4423	1.11888		0.48601	1.49348
0.44755	0.67786		0.48287	1.31711
0.43631	1.87843		0.49383	1.98803
0.45007	0.77573		0.50693	0.65025
0.45312	0.27842		0.49	4.36735
0.44895	1.70323		0.49532	1.50777
0.46842	0.34313		0.49599	1.94928
0.42608	0.35146		0.51408	0.23345
0.44839	0.98263		0.48785	0.58612
0.54918	0.31386		0.32392	0.8538
0.43608	1.76131		0.5147	2.57292
0.45476	0.60767		0.49028	0.87188
0.45373	0.52066		0.49755	1.26062
0.45206	3.91828		0.50177	0.89675
0.45121	0.36824		0.4991	1.59697
0.45289	1.51724		0.49023	3.30187
0.47495	0.56746		0.48495	2.2374
0.49682	0.2354		0.48859	3.8284
0.47197	0.25926		0.48532	0.45394
0.45572	1.41151		0.49983	0.58035
0.44628	1.68148		0.49207	4.45469
0.45288	2.23557		0.49346	2.20141
0.44838	0.77498		0.44168	0.304
0.45898	0.96789		0.49317	1.68768
0.46114	1.16483		0.49553	4.40727
0.47422	0.6232		0.50381	0.6379
0.46889	0.39915		0.4895	2.22625
0.46573	0.35026		0.4892	1.75166
0.45493	1.38253		0.48859	0.89001
0.47937	0.27104		0.51364	0.50993
0.46909	0.58067		0.49436	6.32933
0.46343	0.85682		0.49181	2.65923
0.45517	0.3667		0.49158	4.11125
0.44846	1.24059		0.48107	1.2674
0.48215	0.53094		0.49674	0.9599
0.48431	0.26734		0.50403	0.22623
0.44458	0.33049		0.49574	3.48423
0.44518	0.53403		0.49193	6.37339
0.46515	0.61727		0.50002	0.81835
0.47766	0.52818		0.49214	6.1707
0.43967	1.1735		0.49468	5.56751
0.46009	1.40749		0.49317	4.83091
0.44273	0.46669		0.49369	6.09457
0.47051	0.40723		0.50613	0.62252
0.49252	0.20161		0.48862	2.589
0.49586	0.21822		0.49761	4.02549
0.44867	4.94359		0.48254	2.83876
0.47664	0.50701		0.49296	2.36422
0.47012	0.77947		0.48321	2.20277
0.47339	0.31151		0.50319	0.65002
0.455	1.36878		0.49665	0.26161
0.45947	0.60961		0.48783	0.57931
0.70979	12.5275		0.49082	2.52183
0.45795	0.21094		0.49457	1.05549
0.44779	1.83711		0.51435	0.34292
0.47293	0.48751		0.48788	4.77364
0.46088	1.21257		0.49729	2.00595
0.43663	0.24707		0.48849	0.39543
0.44168	0.27122		0.48421	3.01742
0.45876	0.21924		0.49314	3.66239
0.45315	1.79861		0.48293	1.61746
0.44778	1.77454		0.49117	5.16908
0.452	1.02023		0.47728	0.46419
0.451	0.68996		0.49143	4.68252
0.45131	1.82772		0.48943	1.99426
0.44839	1.69912		0.4897	3.96421
0.44666	1.1125		0.48643	3.29564
0.45069	0.78705		0.48849	1.64202
0.48698	0.35827		0.34446	10.1444
0.47217	0.23303		0.49487	1.19625
0.45077	1.03556		0.49545	1.09834
0.4458	1.14855		0.51107	0.95984
0.45804	0.28982		0.48399	2.72657
0.45298	2.51069		0.4991	1.9801
0.46011	0.79485		0.47323	0.67502
0.47078	0.35254		0.49878	2.22786
0.46224	1.31942		0.48226	1.51272
0.47548	0.23672		0.49976	4.53547
0.41373	2.60365		0.51597	0.2905
0.46141	1.50347		0.49498	4.11347
0.46063	2.05106		0.49568	1.16767
0.42584	1.87143		0.49262	2.89095
0.4672	1.62057		0.48845	5.59922
0.47866	0.44346		0.50393	0.74446
0.45167	0.55072		0.44652	3.8275
0.45523	0.24838		0.4644	5.17257
0.45227	0.45793		0.39675	1.30599
0.45559	0.49401		0.49143	3.34881
0.45892	0.88642		0.4939	2.95891
0.46432	0.71563		0.49729	0.21457
0.44677	0.77555		0.48746	1.49004
0.4404	1.77438		0.48794	1.15841
0.4477	1.07393		0.49282	3.31514
0.45015	0.77888		0.49692	1.86735
0.9146	0.20958		0.49419	2.77729
0.42114	1.98961		0.501	0.67877
0.4539	0.67384		0.49316	0.3628
0.43279	0.96743		0.48254	1.83567
0.44892	0.52709		0.48333	24.7598
0.46342	0.32684		0.48572	8.08285
0.4537	2.13978		0.4863	2.18983
0.50587	0.21977		0.48414	0.7339
0.47064	0.50997		0.48701	9.9986
0.46674	0.20252		0.40989	18.3062
0.41844	0.71169		0.49303	0.93087
0.44626	0.57563		0.48081	1.32604
0.46499	0.28658		0.48643	2.07135
0.45264	1.14327		0.49129	0.63623
0.44772	1.76244		0.43016	4.17123
0.46283	0.59476		0.49274	1.44261
0.46538	0.41021		0.48727	1.59865
0.45109	0.77521		0.46954	0.72829
0.45497	1.48026		0.50117	0.53447
0.45355	1.22327		0.48763	7.61921
0.44668	2.82821		0.48988	4.71828
0.45287	1.28317		0.48933	1.23651
0.40816	3.87206		0.46766	1.37847
0.45112	0.39864		0.49625	2.08269
0.44854	0.90369		0.48679	1.44883
0.44423	0.81718		0.48806	0.67552
0.45307	0.61233		0.4918	1.69173
0.46217	0.98635		0.49039	1.12269
0.4499	2.89315		0.49479	0.9131
0.45946	0.6956		0.49124	3.57474
0.45293	1.40573		0.50016	1.55154
0.4655	0.6205		0.49085	5.2146
0.45125	1.08625		0.49383	6.02191
0.44331	0.23646		0.48358	3.32507
0.46188	0.67463		0.4832	0.82356
0.45471	0.99509		0.47975	0.477
0.48208	0.30632		0.49905	0.59345
0.48596	0.36285		0.48809	3.24384
0.46588	1.05044		0.49211	1.57599
0.46672	2.17262		0.48844	0.38202
0.45796	0.57134		0.49375	3.28429
0.45833	1.14094		0.46646	5.36655
0.44237	1.45628		0.54724	4.46956
0.49211	0.31862		0.50068	1.93489
0.44409	1.31032		0.49056	0.91774
0.45037	0.55048		0.3872	0.78304
0.47847	0.29546		0.49167	4.61454
0.47231	0.41092		0.49398	1.83077
0.45945	0.68866		0.48965	1.10786
0.44586	1.66701		0.49316	5.72373
0.4563	1.06822		0.50784	0.23868
0.45154	1.19989		0.47777	3.45969
0.46192	0.71205		0.48653	4.80397
0.45671	1.73887		0.49434	3.5807
0.4774	0.35211		0.48841	0.28762
0.44909	0.7379		0.39682	3.29551
0.47614	0.29148		0.48871	22.8975
0.4353	1.1697		0.51543	0.49427
0.47159	0.48034		0.49824	3.62665
0.43573	0.36316		0.50112	1.36617
0.46825	0.47375		0.49773	0.21002
0.43121	1.55567		0.49918	0.58316
0.45693	0.71873		0.4913	2.84223
0.46985	1.26742		0.5023	0.75219
0.43544	0.95873		0.43533	0.84617
0.43657	0.34764		0.4833	0.57276
0.48992	0.30155		0.49932	1.85164
0.44894	0.81194		0.4948	1.51175
0.4553	0.47819		0.4901	5.13373
0.4531	0.6968		0.48886	8.50067
0.46129	0.42626		0.50503	0.48685
0.45455	0.39663		0.49837	4.19425
0.45372	1.16627		0.49207	1.01878
0.44248	1.48692		0.50289	1.46287
0.45677	0.99152		0.50675	0.49022
0.47694	0.81333		0.4954	0.29046
0.45161	1.59627		0.49511	0.42655
0.44795	0.59173		0.4488	2.45436
0.46019	0.89859		0.49162	0.56306
0.45073	0.78637		0.49474	3.74968
0.46291	0.77806		0.49097	1.22361
0.46877	0.54639		0.50013	0.42054
0.45693	0.5592		0.4927	3.29914
0.49593	0.63864		0.55515	1.73355
0.45837	0.90302		0.49048	3.69941
0.44806	1.23636		0.49632	1.84904
0.45388	0.40197		0.50133	2.57943
0.44917	0.27153		0.50961	1.08285
0.45952	1.85368		0.49368	11.6263
0.47884	0.58283		0.4856	5.92632
0.44759	0.49047		0.48845	1.24242
0.46301	0.90269		0.4998	1.92029
0.38415	1.35257		0.4958	0.91433
0.45576	0.65262		0.49783	1.13958
0.46554	0.33067		0.4932	1.84695
0.45133	0.28727		0.4897	4.50608
0.45745	0.70575		0.52956	0.24287
0.44585	0.87425		0.43181	0.26361
0.47814	0.20993		0.48321	2.47671
0.45592	0.9659		0.49377	4.59109
0.43182	0.65031		0.48409	0.84056
0.44783	0.63564		0.50531	0.75963
0.45456	1.37903		0.48936	0.35017
0.44994	1.23238		0.50784	0.31522
0.44588	0.6164		0.48218	4.6272
0.47333	0.50663		0.49158	0.8833
0.45398	1.07771		0.5433	1.05564
0.45033	1.24972		0.46833	1.62999
0.45415	1.30115		0.48797	1.1871
0.45855	0.32463		0.48503	0.65484
0.47363	0.38649		0.47979	4.24905
0.4704	0.31228		0.48809	3.79549
0.4564	0.56271		0.48896	3.71525
0.45699	2.93257		0.50658	0.38002
0.41236	0.20802		0.34769	5.04556
0.45394	2.19148		0.48371	1.42653
0.45623	1.55557		0.48447	4.80335
0.37848	0.23742		0.48912	1.16879
0.45222	1.8569		0.48509	5.50391
0.4487	0.76035		0.49337	0.95457
0.47154	0.44976		0.48793	2.83883
0.44554	1.85826		0.48694	0.70176
0.46464	0.47484		0.49987	0.61571
0.4543	2.16352		0.49579	2.4889
0.46834	0.50017		0.50041	0.51318
0.46056	0.53859		0.49343	0.73692
0.49513	1.21076		0.48351	0.52057
0.50421	0.34656		0.44878	0.8036
0.45797	0.43785		0.5014	0.94401
0.4532	0.83529		0.4958	0.44728
0.4522	0.67099		0.48655	1.24309
0.45209	0.23623		0.49007	1.28018
0.45772	1.78301		0.49319	1.12645
0.41067	4.66032		0.46469	8.52012
0.48775	0.25695		0.47907	1.05138
0.45375	1.14508		0.47991	1.53472
0.46089	0.98764		0.48512	3.83029
0.45291	1.27121		0.49038	1.50588
0.46861	0.80845		0.489	3.31923
0.45144	0.56814		0.50101	1.52276
0.48567	0.22407		0.49831	0.99068
0.46014	0.52446		0.47589	3.55079
0.46113	0.61539		0.49365	1.18722
0.4669	0.25016		0.50206	0.53015
0.4469	3.88621		0.48451	2.18283
0.46198	0.77667		0.48626	4.35901
0.43888	0.38838		0.50142	0.6118
0.36348	0.54739		0.47991	10.524
0.44441	0.29262		0.49834	1.05377
0.44947	1.19198		0.49043	2.62311
0.45546	1.12024		0.48116	3.31372
0.45269	1.90696		0.49244	2.7319
0.48206	0.20938		0.49551	4.21091
0.46632	0.38014		0.48368	2.53875
0.46994	0.40525		0.48047	2.69437
0.45287	2.55045		0.50143	0.29475
0.44485	1.48965		0.49475	0.90601
0.44653	1.74052		0.48901	0.82949
0.46153	1.22728		0.4904	1.53567
0.46336	1.3061		0.50114	0.39972
0.46434	0.71396		0.49584	0.40628
0.47286	1.29816		0.31273	0.63093
0.46685	0.3311		0.502	0.95456
0.45166	0.82821		0.48008	2.2342
0.46612	0.86198		0.49654	0.21443
0.45654	1.451		0.48921	6.22699
0.43941	2.82695		0.48667	6.73419
0.45535	0.46731		0.48985	0.6937
0.4964	0.25013		0.49343	4.66092
0.45696	0.39977		0.47127	0.57132
0.45014	1.32889		0.49455	1.09735
0.45471	1.70429		0.51252	0.4644
0.44863	0.49802		0.51371	0.63253
0.68	0.22646		0.48871	3.25874
0.46269	0.84147		0.4911	15.8719
0.45545	0.5744		0.4927	5.26271
0.46291	0.94509		0.49329	3.86881
0.46145	1.32883		0.49552	3.48747
0.46526	0.42492		0.49597	0.33077
0.44979	2.69794		0.47958	0.93757
0.4394	0.60248		0.48314	4.36009
0.4557	1.55587		0.3332	3.74561
0.45375	0.619		0.49923	0.45826
0.4542	1.28192		0.49166	5.39469
0.45428	1.09688		0.49456	0.53448
0.44802	0.67381		0.50162	0.6999
0.45302	0.87985		0.49827	0.38577
0.46448	0.60382		0.47421	0.91431
0.46159	0.84166		0.49394	3.03153
0.45898	0.61135		0.46577	0.30214
0.46385	0.74377		0.51077	0.38194
0.43634	1.10723		0.48635	3.52908
0.47157	0.30667		0.52814	6.27112
0.45819	0.40337		0.49383	4.63455
0.47254	0.26693		0.50449	0.45778
0.45535	1.05162		0.50282	0.2713
0.45706	0.77566		0.4939	1.10823
0.49192	0.22402		0.49627	0.52405
0.46046	0.50793		0.49815	3.05889
0.48048	0.26706		0.50193	1.72071
0.45203	0.81092		0.57325	19.4163
0.46752	1.43603		0.49755	4.22754
0.45499	0.23175		0.49274	4.28704
0.4513	0.87942		0.48898	0.74225
0.45272	0.94355		0.48693	3.44666
0.46083	0.49569		0.48383	4.06074
0.45043	1.53727		0.50748	0.53923
0.4989	0.20177		0.49705	1.33376
0.46222	1.21557		0.48379	2.16167
0.44665	1.32969		0.48618	1.27643
0.39834	0.21687		0.48915	5.68354
0.46814	0.43805		0.51403	1.98375
0.44125	0.48993		0.48085	0.79808
0.45693	1.90773		0.49154	0.27679
0.4637	0.57494		0.48391	4.98553
0.44952	0.44237		0.49371	1.23521
0.42176	0.41385		0.48895	1.71135
0.48828	0.28593		0.49292	2.59419
0.45394	1.31487		0.50499	1.18602
0.45285	0.53758		0.49684	0.90339
0.41783	1.30827		0.47881	1.26522
0.45033	1.58845		0.48163	5.02364
0.47358	0.32039		0.49065	1.71429
0.45529	0.91602		0.50414	0.93591
0.45442	0.76922		0.48756	0.36085
0.46721	0.31823		0.48328	4.06279
0.45477	2.29797		0.49516	4.34859
0.45334	0.74126		0.50063	1.21046
0.46067	0.37044		0.4811	10.0421
0.48194	0.31666		0.49522	0.77181
0.44347	1.7985		0.49684	1.06924
0.46209	0.98661		0.50455	5.12503
0.46489	1.54616		0.46301	4.85928
0.46301	2.23023		0.53783	2.29039
0.40965	1.13469		0.48935	2.42833
0.45144	3.37022		0.49915	1.40602
0.45978	1.00563		0.42511	1.36097
0.45183	0.83343		0.49505	3.56648
0.71081	0.26362		0.49022	2.65842
0.47198	0.26987		0.4943	3.04648
0.4488	0.87496		0.48091	1.15399
0.4845	0.25044		0.48857	3.44388
0.44603	0.61749		0.49339	0.49045
0.46033	0.23931		0.45377	2.81144
0.45951	1.00178		0.48353	2.33495
0.44907	0.70199		0.47386	7.28264
0.45636	1.4823		0.49477	19.2873
0.45579	1.48876		0.35805	3.17017
0.46373	0.22564		0.47718	10.3137
0.45161	2.40246		0.50209	6.9646
0.46923	0.98336		0.48133	30.9263
0.45702	1.03917		0.48812	12.8825
0.43035	1.37155		0.43235	14.4889
0.45394	0.67855		0.48795	2.03442
0.45907	0.4709		0.46099	4.58896
0.46444	0.86974		0.45281	3.80815
0.45077	1.04815		0.47373	4.28461
0.46892	0.84952		0.48591	16.9224
0.46307	0.6594		0.48425	8.31145
0.49286	0.26738		0.48613	3.29537
0.4431	0.91598		0.4909	0.96599
0.46376	1.03376		0.49657	1.97283
0.46395	0.35319		0.49586	2.17917
0.47278	0.26697		0.49485	2.58344
0.24357	0.23996		0.49777	5.52082
0.45686	0.35277		0.48567	6.13189
0.46407	0.45085		0.49645	3.60746
0.45738	1.02388		0.49407	4.38346
0.47689	0.31542		0.49516	6.34866
0.45778	1.53101		0.48754	1.51716
0.46029	0.59836		0.51133	0.24784
0.47431	0.29514		0.49268	4.27084
0.46452	0.39991		0.49325	4.52777
0.48957	0.30561		0.49866	1.60447
0.44542	0.88972		0.494	3.93918
0.44133	0.99969		0.49738	1.6706
0.43823	2.43556		0.50192	1.54643
0.41459	0.80833		0.49386	0.73479
0.45896	0.98183		0.4918	5.85162
0.44912	1.03206		0.40974	1.49518
0.4642	0.76835		0.5002	0.23544
0.45018	1.40325		0.48717	6.62906
0.46478	0.8945		0.48653	2.13292
0.46482	0.27115		0.48874	35.7593
0.45448	3.05546		0.46344	7.81979
0.47048	0.2835		0.48125	6.50376
0.46605	1.10834		0.49154	4.77708
0.45907	2.00433		0.50019	0.27863
0.45583	0.3502		0.48961	0.91101
0.47428	0.46564		0.4949	2.34203
0.45528	0.87116		0.49221	5.28327
0.44769	1.4791		0.50012	8.32247
0.45871	0.36567		0.48497	3.36918
0.47796	0.21398		0.48726	3.98632
0.46634	0.33838		0.49627	1.56913
0.46144	0.99202		0.46183	1.22037
0.44064	1.03446		0.49255	1.67845
0.466	1.25154		0.50547	0.68839
0.45382	0.90945		0.49172	3.9868
0.46578	0.2352		0.49176	1.74697
0.45529	0.45419		0.47648	0.46834
0.44165	4.71375		0.99003	0.25814
0.44591	0.37223		0.94991	0.2684
0.44714	0.42761		0.98951	0.23576
0.45611	1.38884		0.95084	0.23849
0.40783	0.20991		0.99246	0.22897
0.45787	0.94594		0.86132	0.203
0.49387	0.37252		0.50416	0.90484
0.47043	0.40236		0.48532	1.59449
0.4535	1.08498		0.49763	1.03641
0.45502	0.62651		0.51237	1.61484
0.47359	0.2184		0.49949	1.11651
0.46761	0.47921		0.5631	0.35436
0.47651	0.29038		0.48914	3.85476
0.4403	1.11863		0.43591	0.68098
0.46083	0.30977		0.47056	6.85071
0.45532	0.55206		0.48197	2.41041
0.47381	0.52809		0.49892	1.19157
0.44772	1.28689		0.45268	0.41892
0.45648	0.3677		0.48768	4.50781
0.4519	1.01436		0.49296	2.89479
0.45219	0.73567		0.52896	0.36872
0.41147	1.54635		0.49205	5.25653
0.52319	0.20171		0.49426	0.31151
0.48552	0.23163		0.49136	1.22819
0.4518	1.21477		0.4872	3.90165
0.48286	0.23352		0.49882	1.12385
0.41447	7.80517		0.49184	0.44148
0.45318	0.66879		0.48635	2.35089
0.46278	0.31776		0.48753	1.05213
0.46818	0.60363		0.49785	0.27614
0.45166	0.64382		0.47097	1.55551
0.44466	0.87401		0.49067	0.67889
0.48061	0.21864		0.49556	0.69548
0.43799	0.95596		0.61972	0.58175
0.44922	1.84379		0.49054	1.83765
0.46132	0.52835		0.48802	0.55313
0.46003	0.39467		0.49794	0.57538
0.45223	0.59409		0.50966	0.43274
0.46987	0.28726		0.49373	1.83816
0.47291	0.37578		0.49001	2.04708
0.70764	0.25636		0.49417	1.86223
0.43912	1.25187		0.48326	0.49664
0.47068	0.61365		0.49862	0.46584
0.45796	0.74465		0.51176	1.17435
0.45342	0.78298		0.50361	1.99889
[truncated: 24,372 more rows]

## Sheet: Fig. 6e
Scatter			Peak Fitting 1			Peak Fitting 2
BlockDepth	Restime (ms)		BlockDepth	Relative counts		BlockDepth	Relative counts
0.69666	0.16245		0.0025	0.00284		0.0025	0.00284
0.29916	0.13417		0.00449	0.00284		0.00449	0.00284
0.60007	0.17857		0.00549	0.00284		0.00549	0.00284
0.64422	0.20673		0.00648	0.00284		0.00648	0.00284
0.68437	0.12813		0.00748	0.00284		0.00748	0.00284
0.67585	0.15122		0.0075	0.00284		0.0075	0.00284
0.66168	0.12339		0.00848	0.00284		0.00848	0.00284
0.54193	0.1023		0.00947	0.00284		0.00947	0.00284
0.79958	0.11357		0.01047	0.00284		0.01047	0.00284
0.55987	0.10215		0.01146	0.00284		0.01146	0.00284
0.18202	534.054		0.01246	0.00284		0.01246	0.00284
0.65609	0.12617		0.0125	0.00284		0.0125	0.00284
0.78877	0.13701		0.01346	0.00284		0.01346	0.00284
0.69179	0.13833		0.01445	0.00284		0.01445	0.00284
0.8853	0.18563		0.01545	0.00284		0.01545	0.00284
0.62521	0.24884		0.01644	0.00284		0.01644	0.00284
0.596	0.27289		0.01744	0.00284		0.01744	0.00284
0.64601	0.10367		0.0175	0.00284		0.0175	0.00284
0.62779	0.18854		0.01844	0.00284		0.01844	0.00284
0.70211	0.1489		0.01943	0.00284		0.01943	0.00284
0.73029	0.10113		0.02043	0.00284		0.02043	0.00284
0.71039	0.1703		0.02142	0.00284		0.02142	0.00284
0.67037	0.19215		0.02242	0.00284		0.02242	0.00284
0.59164	0.21031		0.0225	0.00284		0.0225	0.00284
0.64023	0.18671		0.02342	0.00284		0.02342	0.00284
0.69395	0.10312		0.02441	0.00284		0.02441	0.00284
0.6693	0.11988		0.02541	0.00284		0.02541	0.00284
0.63759	0.10203		0.0264	0.00284		0.0264	0.00284
0.683	0.11948		0.0274	0.00284		0.0274	0.00284
0.54885	0.15752		0.0275	0.00284		0.0275	0.00284
0.68501	0.21776		0.0284	0.00284		0.0284	0.00284
0.67575	0.10302		0.02939	0.00284		0.02939	0.00284
0.41517	11.0355		0.03039	0.00284		0.03039	0.00284
0.6619	0.26574		0.03138	0.00284		0.03138	0.00284
0.91162	0.10444		0.03238	0.00284		0.03238	0.00284
0.87852	0.10676		0.0325	0.00284		0.0325	0.00284
0.63251	0.13102		0.03338	0.00284		0.03338	0.00284
0.35996	0.1313		0.03437	0.00284		0.03437	0.00284
0.55772	0.10164		0.03537	0.00284		0.03537	0.00284
0.66027	0.10216		0.03636	0.00284		0.03636	0.00284
0.68853	0.16758		0.03736	0.00284		0.03736	0.00284
0.71156	0.11453		0.0375	0.00284		0.0375	0.00284
0.76794	0.12048		0.03836	0.00284		0.03836	0.00284
0.69288	0.10901		0.03935	0.00284		0.03935	0.00284
0.40817	0.15032		0.04035	0.00284		0.04035	0.00284
0.58768	0.27872		0.04134	0.00284		0.04134	0.00284
0.62351	0.15799		0.04234	0.00284		0.04234	0.00284
0.73001	0.15744		0.0425	0.00284		0.0425	0.00284
0.62662	0.27441		0.04334	0.00284		0.04334	0.00284
0.44158	0.11374		0.04433	0.00284		0.04433	0.00284
0.62849	0.17753		0.04533	0.00284		0.04533	0.00284
0.56788	0.17999		0.04632	0.00284		0.04632	0.00284
0.5776	0.22485		0.04732	0.00284		0.04732	0.00284
0.69077	0.11874		0.0475	0.00284		0.0475	0.00284
0.77197	0.14755		0.04832	0.00284		0.04832	0.00284
0.58025	0.17077		0.04931	0.00284		0.04931	0.00284
0.6187	0.16073		0.05031	0.00284		0.05031	0.00284
0.68493	0.11589		0.0513	0.00284		0.0513	0.00284
0.60678	0.20293		0.0523	0.00284		0.0523	0.00284
0.69297	0.10925		0.0525	0.00284		0.0525	0.00284
0.41507	4.016		0.0533	0.00284		0.0533	0.00284
0.36369	0.14693		0.05429	0.00284		0.05429	0.00284
0.65282	0.11942		0.05529	0.00284		0.05529	0.00284
0.65455	0.11874		0.05628	0.00284		0.05628	0.00284
0.63148	0.14981		0.05728	0.00284		0.05728	0.00284
0.7022	0.11229		0.0575	0.00284		0.0575	0.00284
0.4154	7.38601		0.05828	0.00284		0.05828	0.00284
0.70401	0.14688		0.05927	0.00284		0.05927	0.00284
0.63891	0.1786		0.06027	0.00284		0.06027	0.00284
0.63268	0.11909		0.06126	0.00284		0.06126	0.00284
0.57526	0.10664		0.06226	0.00284		0.06226	0.00284
0.58676	0.30875		0.0625	0.00284		0.0625	0.00284
0.61929	0.12122		0.06326	0.00284		0.06326	0.00284
0.76169	0.10599		0.06425	0.00284		0.06425	0.00284
0.73204	0.13293		0.06525	0.00284		0.06525	0.00284
0.73042	0.10614		0.06624	0.00284		0.06624	0.00284
0.65118	0.2702		0.06724	0.00284		0.06724	0.00284
0.41674	0.55034		0.0675	0.00284		0.0675	0.00284
0.55131	0.11817		0.06824	0.00284		0.06824	0.00284
0.54348	0.1059		0.06923	0.00284		0.06923	0.00284
0.72793	0.12309		0.07023	0.00284		0.07023	0.00284
0.6502	0.21539		0.07122	0.00284		0.07122	0.00284
0.3536	0.15094		0.07222	0.00284		0.07222	0.00284
0.28841	0.16202		0.0725	0.00284		0.0725	0.00284
0.51932	0.63621		0.07322	0.00284		0.07322	0.00284
0.62602	0.21444		0.07421	0.00284		0.07421	0.00284
0.68182	0.13615		0.07521	0.00284		0.07521	0.00284
0.42847	3.9145		0.0762	0.00284		0.0762	0.00284
0.67575	0.16903		0.0772	0.00284		0.0772	0.00284
0.66343	0.25639		0.0775	0.00284		0.0775	0.00284
0.53182	0.18328		0.0782	0.00284		0.0782	0.00284
0.66913	0.13524		0.07919	0.00284		0.07919	0.00284
0.72447	0.17664		0.08019	0.00284		0.08019	0.00284
0.48371	0.12275		0.08118	0.00284		0.08118	0.00284
0.6343	0.14069		0.08218	0.00284		0.08218	0.00284
0.45858	1.36301		0.0825	0.00284		0.0825	0.00284
0.65599	0.14644		0.08318	0.00284		0.08318	0.00284
0.63819	0.11694		0.08417	0.00284		0.08417	0.00284
0.67054	0.14339		0.08517	0.00284		0.08517	0.00284
0.41923	0.70465		0.08616	0.00284		0.08616	0.00284
0.27917	0.24606		0.08716	0.00284		0.08716	0.00284
0.43758	0.12264		0.0875	0.00284		0.0875	0.00284
0.6575	0.10322		0.08816	0.00284		0.08816	0.00284
0.47104	0.11752		0.08915	0.00284		0.08915	0.00284
0.41015	4.57535		0.09015	0.00284		0.09015	0.00284
0.25639	0.14665		0.09114	0.00284		0.09114	0.00284
0.75243	0.1288		0.09214	0.00284		0.09214	0.00284
0.0962	1.77486		0.0925	0.00284		0.0925	0.00284
0.70999	0.20393		0.09314	0.00284		0.09314	0.00284
0.70328	0.1165		0.09413	0.00284		0.09413	0.00284
0.4139	1.23392		0.09513	0.00284		0.09513	0.00284
0.59861	0.20468		0.09612	0.00284		0.09612	0.00284
0.70659	0.1996		0.09712	0.00284		0.09712	0.00284
0.66127	0.234		0.0975	0.00284		0.0975	0.00284
0.75298	0.11416		0.09812	0.00284		0.09812	0.00284
0.46825	2.06413		0.09911	0.00284		0.09911	0.00284
0.42033	2.32568		0.10011	0.00284		0.10011	0.00284
0.88196	0.22217		0.1011	0.00284		0.1011	0.00284
0.42537	1.11806		0.1021	0.00284		0.1021	0.00284
0.6673	0.2035		0.1025	0.00284		0.1025	0.00284
0.59571	0.46281		0.1031	0.00284		0.1031	0.00284
0.67956	0.11339		0.10409	0.00284		0.10409	0.00284
0.66723	0.19163		0.10509	0.00284		0.10509	0.00284
0.61752	0.14342		0.10608	0.00284		0.10608	0.00284
0.51198	0.10139		0.10708	0.00284		0.10708	0.00284
0.70969	0.13065		0.1075	0.00284		0.1075	0.00284
0.48721	0.10121		0.10808	0.00284		0.10808	0.00284
0.28891	0.17113		0.10907	0.00284		0.10907	0.00284
0.66128	0.17474		0.11007	0.00284		0.11007	0.00284
0.59064	0.15038		0.11106	0.00284		0.11106	0.00284
0.35067	0.16771		0.11206	0.00284		0.11206	0.00284
0.54803	0.23971		0.1125	0.00284		0.1125	0.00284
0.56569	0.29598		0.11306	0.00284		0.11306	0.00284
0.63091	0.1236		0.11405	0.00284		0.11405	0.00284
0.6494	0.13882		0.11505	0.00284		0.11505	0.00284
0.60326	0.25509		0.11604	0.00284		0.11604	0.00284
0.59966	0.11483		0.11704	0.00284		0.11704	0.00284
0.66455	0.11875		0.1175	0.00284		0.1175	0.00284
0.11342	0.11703		0.11804	0.00284		0.11804	0.00284
0.43843	0.162		0.11903	0.00284		0.11903	0.00284
0.67149	0.26249		0.12003	0.00284		0.12003	0.00284
0.5688	0.10596		0.12102	0.00284		0.12102	0.00284
0.71126	0.17338		0.12202	0.00284		0.12202	0.00284
0.65589	0.15145		0.1225	0.00284		0.1225	0.00284
0.73841	0.10114		0.12302	0.00284		0.12302	0.00284
0.66925	0.11909		0.12401	0.00284		0.12401	0.00284
0.66609	0.20599		0.12501	0.00284		0.12501	0.00284
0.68733	0.10967		0.126	0.00284		0.126	0.00284
0.65221	0.1513		0.127	0.00284		0.127	0.00284
0.3918	0.14262		0.1275	0.00284		0.1275	0.00284
0.68349	0.15458		0.128	0.00284		0.128	0.00284
0.6184	0.1651		0.12899	0.00284		0.12899	0.00284
0.67251	0.11254		0.12999	0.00284		0.12999	0.00284
0.45809	9.79974		0.13098	0.00284		0.13098	0.00284
0.60913	0.16259		0.13198	0.00284		0.13198	0.00284
0.42471	5.05676		0.1325	0.00284		0.1325	0.00284
0.41278	0.11477		0.13298	0.00284		0.13298	0.00284
0.46975	1.47942		0.13397	0.00284		0.13397	0.00284
0.67558	0.15599		0.13497	0.00284		0.13497	0.00284
0.68599	0.19368		0.13596	0.00284		0.13596	0.00284
0.63673	0.14274		0.13696	0.00284		0.13696	0.00284
0.70161	0.11425		0.1375	0.00284		0.1375	0.00284
0.52935	0.14246		0.13796	0.00284		0.13796	0.00284
0.72178	0.17431		0.13895	0.00284		0.13895	0.00284
0.56244	0.19103		0.13995	0.00284		0.13995	0.00284
0.62647	0.17365		0.14094	0.00284		0.14094	0.00284
0.68264	0.19588		0.14194	0.00284		0.14194	0.00284
0.63737	0.14408		0.1425	0.00284		0.1425	0.00284
0.42676	0.98328		0.14294	0.00284		0.14294	0.00284
0.22998	0.20713		0.14393	0.00284		0.14393	0.00284
0.61846	0.33749		0.14493	0.00284		0.14493	0.00284
0.70131	0.14273		0.14592	0.00284		0.14592	0.00284
0.42159	0.52792		0.14692	0.00284		0.14692	0.00284
0.75233	0.14444		0.1475	0.00284		0.1475	0.00284
0.71745	0.14892		0.14792	0.00284		0.14792	0.00284
0.44657	0.12326		0.14891	0.00284		0.14891	0.00284
0.29815	0.29993		0.14991	0.00284		0.14991	0.00284
0.60807	0.22108		0.1509	0.00284		0.1509	0.00284
0.65186	0.23963		0.1519	0.00284		0.1519	0.00284
0.43914	0.35347		0.1525	0.00284		0.1525	0.00284
0.56634	0.11098		0.1529	0.00284		0.1529	0.00284
0.65448	0.12889		0.15389	0.00284		0.15389	0.00284
0.67086	0.15954		0.15489	0.00284		0.15489	0.00284
0.61253	0.2137		0.15588	0.00284		0.15588	0.00284
0.68015	0.20193		0.15688	0.00284		0.15688	0.00284
0.44527	0.16266		0.1575	0.00284		0.1575	0.00284
0.73722	0.13537		0.15788	0.00284		0.15788	0.00284
0.72975	0.14159		0.15887	0.00284		0.15887	0.00284
0.58383	0.16161		0.15987	0.00284		0.15987	0.00284
0.92494	0.36404		0.16086	0.00284		0.16086	0.00284
0.48222	0.13827		0.16186	0.00284		0.16186	0.00284
0.60235	0.40685		0.1625	0.00284		0.1625	0.00284
0.65888	0.13849		0.16286	0.00284		0.16286	0.00284
0.61716	0.24315		0.16385	0.00284		0.16385	0.00284
0.41346	1.06095		0.16485	0.00284		0.16485	0.00284
0.64654	0.11053		0.16584	0.00284		0.16584	0.00284
0.61116	0.1252		0.16684	0.00284		0.16684	0.00284
0.48716	0.18547		0.1675	0.00284		0.1675	0.00284
0.42692	4.0262		0.16784	0.00284		0.16784	0.00284
0.48293	0.2182		0.16883	0.00284		0.16883	0.00284
0.86833	0.15003		0.16983	0.00284		0.16983	0.00284
0.62834	0.1559		0.17082	0.00284		0.17082	0.00284
0.47406	0.20245		0.17182	0.00284		0.17182	0.00284
0.54339	0.11764		0.1725	0.00284		0.1725	0.00284
0.58318	0.44726		0.17282	0.00284		0.17282	0.00284
0.4933	0.11789		0.17381	0.00284		0.17381	0.00284
0.41626	9.8986		0.17481	0.00284		0.17481	0.00284
0.64568	0.12589		0.1758	0.00284		0.1758	0.00284
0.43123	0.10946		0.1768	0.00284		0.1768	0.00284
0.56686	0.10921		0.1775	0.00284		0.1775	0.00284
0.42717	1.00041		0.1778	0.00284		0.1778	0.00284
0.79064	0.12895		0.17879	0.00284		0.17879	0.00284
0.59898	0.19889		0.17979	0.00284		0.17979	0.00284
0.43635	11.3355		0.18078	0.00284		0.18078	0.00284
0.4179	0.43151		0.18178	0.00284		0.18178	0.00284
0.28593	0.16284		0.1825	0.00284		0.1825	0.00284
0.4203	11.3179		0.18278	0.00284		0.18278	0.00284
0.57836	0.1301		0.18377	0.00284		0.18377	0.00284
0.67582	0.10779		0.18477	0.00284		0.18477	0.00284
0.63876	0.39548		0.18576	0.00284		0.18576	0.00284
0.30727	0.21959		0.18676	0.00284		0.18676	0.00284
0.70605	0.1495		0.1875	0.00284		0.1875	0.00284
0.67514	0.1226		0.18776	0.00284		0.18776	0.00284
0.7575	0.11396		0.18875	0.00284		0.18875	0.00284
0.6144	0.16917		0.18975	0.00284		0.18975	0.00284
0.66748	0.20584		0.19074	0.00284		0.19074	0.00284
0.61698	0.36038		0.19174	0.00284		0.19174	0.00284
0.41923	3.52833		0.1925	0.00284		0.1925	0.00284
0.59739	0.22005		0.19274	0.00284		0.19274	0.00284
0.55763	0.23478		0.19373	0.00284		0.19373	0.00284
0.71155	0.13134		0.19473	0.00284		0.19473	0.00284
0.66162	0.18596		0.19572	0.00284		0.19572	0.00284
0.44565	0.11384		0.19672	0.00284		0.19672	0.00284
0.59584	0.20694		0.1975	0.00284		0.1975	0.00284
0.69972	0.16059		0.19772	0.00284		0.19772	0.00284
0.41087	6.39949		0.19871	0.00284		0.19871	0.00284
0.6537	0.19379		0.19971	0.00284		0.19971	0.00284
0.43182	1.44292		0.2007	0.00284		0.2007	0.00284
0.41762	0.9837		0.2017	0.00284		0.2017	0.00284
0.42433	6.5612		0.2025	0.00284		0.2025	0.00284
0.42625	0.61416		0.2027	0.00284		0.2027	0.00284
0.68074	0.10951		0.20369	0.00284		0.20369	0.00284
0.5983	0.11088		0.20469	0.00284		0.20469	0.00284
0.42003	2.80127		0.20568	0.00284		0.20568	0.00284
0.44056	0.61813		0.20668	0.00284		0.20668	0.00284
0.42739	1.32888		0.2075	0.00284		0.2075	0.00284
0.41174	6.11498		0.20768	0.00284		0.20768	0.00284
0.41736	5.69361		0.20867	0.00284		0.20867	0.00284
0.42427	6.78065		0.20967	0.00284		0.20967	0.00284
0.42418	11.5154		0.21066	0.00284		0.21066	0.00284
0.41813	4.41851		0.21166	0.00284		0.21166	0.00284
0.64412	0.16999		0.2125	0.00284		0.2125	0.00284
0.73017	0.12221		0.21266	0.00284		0.21266	0.00284
0.40683	4.69859		0.21365	0.00284		0.21365	0.00284
0.42116	0.38685		0.21465	0.00284		0.21465	0.00284
0.43398	11.5239		0.21564	0.00284		0.21564	0.00284
0.42639	10.0634		0.21664	0.00284		0.21664	0.00284
0.42855	4.59023		0.2175	0.00284		0.2175	0.00284
0.42662	0.55121		0.21764	0.00284		0.21764	0.00284
0.41394	1.49914		0.21863	0.00284		0.21863	0.00284
0.43533	1.12739		0.21963	0.00284		0.21963	0.00284
0.41589	0.38551		0.22062	0.00284		0.22062	0.00284
0.40457	4.93172		0.22162	0.00284		0.22162	0.00284
0.64998	0.11093		0.2225	0.00284		0.2225	0.00284
0.41804	6.11084		0.22262	0.00284		0.22262	0.00284
0.41238	2.71597		0.22361	0.00284		0.22361	0.00284
0.41945	1.43432		0.22461	0.00284		0.22461	0.00284
0.67612	0.11763		0.2256	0.00284		0.2256	0.00284
0.41749	4.4159		0.2266	0.00284		0.2266	0.00284
0.44126	0.69787		0.2275	0.00284		0.2275	0.00284
0.41687	6.59982		0.2276	0.00284		0.2276	0.00284
0.4131	2.37915		0.22859	0.00284		0.22859	0.00284
0.416	4.20946		0.22959	0.00284		0.22959	0.00284
0.42896	0.32568		0.23058	0.00284		0.23058	0.00284
0.36784	2.55522		0.23158	0.00284		0.23158	0.00284
0.4027	0.13044		0.2325	0.00284		0.2325	0.00284
0.43048	1.10121		0.23258	0.00284		0.23258	0.00284
0.65004	0.14207		0.23357	0.00284		0.23357	0.00284
0.90581	0.313		0.23457	0.00284		0.23457	0.00284
0.9741	0.13006		0.23556	0.00284		0.23556	0.00284
0.90736	0.12626		0.23656	0.00284		0.23656	0.00284
0.93	0.19614		0.2375	0.00284		0.2375	0.00284
0.90331	0.51551		0.23756	0.00284		0.23756	0.00284
0.8694	0.33403		0.23855	0.00284		0.23855	0.00284
0.94261	0.11602		0.23955	0.00284		0.23955	0.00284
0.83036	0.10171		0.24054	0.00284		0.24054	0.00284
0.4168	2.01674		0.24154	0.00284		0.24154	0.00284
0.40955	0.83644		0.2425	0.00284		0.2425	0.00284
0.44086	0.52824		0.24254	0.00284		0.24254	0.00284
0.43512	0.59394		0.24353	0.00284		0.24353	0.00284
0.74387	0.11202		0.24453	0.00284		0.24453	0.00284
0.6489	2.25491		0.24552	0.00284		0.24552	0.00284
0.41154	0.42745		0.24652	0.00284		0.24652	0.00284
0.41734	2.18928		0.2475	0.00284		0.2475	0.00284
0.40485	3.17823		0.24752	0.00284		0.24752	0.00284
0.46925	0.21431		0.24851	0.00284		0.24851	0.00284
0.40651	1.7798		0.24951	0.00284		0.24951	0.00284
0.41131	0.21579		0.2505	0.00284		0.2505	0.00284
0.41918	3.88171		0.2515	0.00284		0.2515	0.00284
0.47512	3.21143		0.25249	0.00284		0.25249	0.00284
0.42012	2.26256		0.2525	0.00284		0.2525	0.00284
0.42254	0.74299		0.25349	0.00284		0.25349	0.00284
0.36856	0.15138		0.25449	0.00284		0.25449	0.00284
0.42525	4.83915		0.25548	0.00284		0.25548	0.00284
0.22536	0.21071		0.25648	0.00284		0.25648	0.00284
0.47654	0.1868		0.25747	0.00284		0.25747	0.00284
0.70413	0.25579		0.2575	0.00284		0.2575	0.00284
0.90655	0.41621		0.25847	0.00284		0.25847	0.00284
0.42912	0.25857		0.25947	0.00284		0.25947	0.00284
0.42352	0.65295		0.26046	0.00284		0.26046	0.00284
0.42924	0.32888		0.26146	0.00284		0.26146	0.00284
0.41576	5.75973		0.26245	0.00284		0.26245	0.00284
0.4195	4.25094		0.2625	0.00284		0.2625	0.00284
0.42537	11.4818		0.26345	0.00284		0.26345	0.00284
0.44492	0.11945		0.26445	0.00284		0.26445	0.00284
0.42815	4.79467		0.26544	0.00284		0.26544	0.00284
0.42634	2.69461		0.26644	0.00284		0.26644	0.00284
0.59575	0.12164		0.26743	0.00284		0.26743	0.00284
0.41716	1.4521		0.2675	0.00284		0.2675	0.00284
0.57481	0.31867		0.26843	0.00284		0.26843	0.00284
0.4155	7.88235		0.26943	0.00284		0.26943	0.00284
0.42841	1.17339		0.27042	0.00284		0.27042	0.00284
0.4203	4.41564		0.27142	0.00284		0.27142	0.00284
0.4183	3.67007		0.27241	0.00284		0.27241	0.00284
0.42589	5.55834		0.2725	0.00284		0.2725	0.00284
0.4155	2.9234		0.27341	0.00284		0.27341	0.00284
0.41703	12.4272		0.27441	0.00284		0.27441	0.00284
0.42179	23.2116		0.2754	0.00284		0.2754	0.00284
0.41926	2.53429		0.2764	0.00284		0.2764	0.00284
0.41763	6.67174		0.27739	0.00284		0.27739	0.00284
0.41155	10.5258		0.2775	0.00284		0.2775	0.00284
0.41485	11.3892		0.27839	0.00284		0.27839	0.00284
0.42783	4.77057		0.27939	0.00284		0.27939	0.00284
0.46867	0.20645		0.28038	0.00284		0.28038	0.00284
0.41727	2.9822		0.28138	0.00284		0.28138	0.00284
0.4125	1.33056		0.28237	0.00284		0.28237	0.00284
0.4197	3.67191		0.2825	0.00284		0.2825	0.00284
0.41894	0.96652		0.28337	0.00284		0.28337	0.00284
0.71744	0.13364		0.28437	0.00284		0.28437	0.00284
0.46479	0.50808		0.28536	0.00284		0.28536	0.00284
0.41441	7.31225		0.28636	0.00284		0.28636	0.00284
0.43531	1.78141		0.28735	0.00284		0.28735	0.00284
0.41901	2.63632		0.2875	0.00284		0.2875	0.00284
0.69675	0.12454		0.28835	0.00284		0.28835	0.00284
0.40364	0.14627		0.28935	0.00284		0.28935	0.00284
0.45962	11.2845		0.29034	0.00284		0.29034	0.00284
0.41667	1.19484		0.29134	0.00284		0.29134	0.00284
0.40969	3.69509		0.29233	0.00284		0.29233	0.00284
0.46129	10.7504		0.2925	0.00284		0.2925	0.00284
0.41376	11.318		0.29333	0.00284		0.29333	0.00284
0.42347	3.21951		0.29433	0.00284		0.29433	0.00284
0.61151	0.14636		0.29532	0.00284		0.29532	0.00284
0.4333	0.63345		0.29632	0.00284		0.29632	0.00284
0.59809	0.13059		0.29731	0.00284		0.29731	0.00284
0.42111	3.76752		0.2975	0.00284		0.2975	0.00284
0.46569	4.74977		0.29831	0.00284		0.29831	0.00284
0.4722	0.13947		0.29931	0.00284		0.29931	0.00284
0.30734	0.24595		0.3003	0.00284		0.3003	0.00284
0.43368	0.32239		0.3013	0.00284		0.3013	0.00284
0.42085	26.7789		0.30229	0.00284		0.30229	0.00284
0.41517	5.64713		0.3025	0.00284		0.3025	0.00284
0.41776	7.23549		0.30329	0.00284		0.30329	0.00284
0.4027	5.08649		0.30429	0.00284		0.30429	0.00284
0.42985	0.61455		0.30528	0.00284		0.30528	0.00284
0.21789	0.27381		0.30628	0.00284		0.30628	0.00284
0.72336	0.19798		0.30727	0.00284		0.30727	0.00284
0.41862	13.1962		0.3075	0.00284		0.3075	0.00284
0.41225	15.1515		0.30827	0.00284		0.30827	0.00284
0.41164	6.37403		0.30927	0.00284		0.30927	0.00284
0.4082	3.81694		0.31026	0.00284		0.31026	0.00284
0.41924	16.031		0.31126	0.00284		0.31126	0.00284
0.41574	3.66648		0.31225	0.00284		0.31225	0.00284
0.53289	0.14606		0.3125	0.00284		0.3125	0.00284
0.41967	10.3396		0.31325	0.00284		0.31325	0.00284
0.42076	2.24024		0.31425	0.00284		0.31425	0.00284
0.43018	6.68966		0.31524	0.00284		0.31524	0.00284
0.42185	2.99952		0.31624	0.00284		0.31624	0.00284
0.43462	0.40679		0.31723	0.00284		0.31723	0.00284
0.6738	0.12141		0.3175	0.00284		0.3175	0.00284
0.42179	4.68822		0.31823	0.00284		0.31823	0.00284
0.41528	3.08988		0.31923	0.00284		0.31923	0.00284
0.42202	4.32261		0.32022	0.00284		0.32022	0.00284
0.57693	0.72744		0.32122	0.00284		0.32122	0.00284
0.43299	0.81975		0.32221	0.00284		0.32221	0.00284
0.41447	10.2954		0.3225	0.00284		0.3225	0.00284
0.42206	0.33922		0.32321	0.00284		0.32321	0.00284
0.41578	13.6296		0.32421	0.00284		0.32421	0.00284
0.45406	0.27481		0.3252	0.00284		0.3252	0.00284
0.455	4.63932		0.3262	0.00284		0.3262	0.00284
0.40674	3.28516		0.32719	0.00284		0.32719	0.00284
0.42768	1.01025		0.3275	0.00284		0.3275	0.00284
0.44391	0.39458		0.32819	0.00284		0.32819	0.00284
0.43091	0.35916		0.32919	0.00284		0.32919	0.00284
0.41149	0.50114		0.33018	0.00284		0.33018	0.00284
0.42515	6.86028		0.33118	0.00284		0.33118	0.00284
0.40137	0.50006		0.33217	0.00284		0.33217	0.00284
0.69618	0.11979		0.3325	0.00284		0.3325	0.00284
0.47839	1.91894		0.33317	0.00284		0.33317	0.00284
0.41941	5.68205		0.33417	0.00284		0.33417	0.00284
0.41948	0.22216		0.33516	0.00284		0.33516	0.00284
0.71732	0.13365		0.33616	0.00284		0.33616	0.00284
0.42322	9.4068		0.33715	0.00284		0.33715	0.00284
0.42518	17.1846		0.3375	0.00284		0.3375	0.00284
0.42503	1.46993		0.33815	0.00284		0.33815	0.00284
0.42907	2.10287		0.33915	0.00284		0.33915	0.00284
0.43626	0.53357		0.34014	0.00284		0.34014	0.00284
0.44057	0.89354		0.34114	0.00284		0.34114	0.00284
0.41084	2.03262		0.34213	0.00284		0.34213	0.00284
0.56532	0.11326		0.3425	0.00284		0.3425	0.00284
0.41241	11.1107		0.34313	0.00284		0.34313	0.00284
0.42944	1.48577		0.34413	0.00284		0.34413	0.00284
0.42264	1.6102		0.34512	0.00284		0.34512	0.00284
0.41381	1.95376		0.34612	0.00284		0.34612	0.00284
0.41161	1.64973		0.34711	0.00284		0.34711	0.00284
0.74961	0.10469		0.3475	0.00284		0.3475	0.00284
0.41133	2.21452		0.34811	0.00284		0.34811	0.00284
0.43069	1.60126		0.34911	0.00284		0.34911	0.00284
0.4205	0.45545		0.3501	0.00284		0.3501	0.00284
0.4204	0.6786		0.3511	0.00284		0.3511	0.00284
0.43758	1.70341		0.35209	0.00284		0.35209	0.00284
0.42559	0.98463		0.3525	0.00284		0.3525	0.00284
0.4269	3.64185		0.35309	0.00284		0.35309	0.00284
0.42272	7.36554		0.35409	0.00284		0.35409	0.00284
0.43067	0.88709		0.35508	0.00284		0.35508	0.00284
0.47197	0.49936		0.35608	0.00284		0.35608	0.00284
0.41739	7.89445		0.35707	0.00284		0.35707	0.00284
0.4141	1.63115		0.3575	0.00284		0.3575	0.00284
0.65778	0.14406		0.35807	0.00284		0.35807	0.00284
0.42744	2.89653		0.35907	0.00284		0.35907	0.00284
0.42211	5.49576		0.36006	0.00284		0.36006	0.00284
0.4251	7.43523		0.36106	0.00284		0.36106	0.00284
0.42604	4.0984		0.36205	0.00284		0.36205	0.00284
0.41971	5.88926		0.3625	0.00284		0.3625	0.00284
0.41814	5.2637		0.36305	0.00284		0.36305	0.00284
0.41714	5.18983		0.36405	0.00284		0.36405	0.00284
0.42515	2.07161		0.36504	0.00284		0.36504	0.00284
0.48446	9.20004		0.36604	0.00284		0.36604	0.00284
0.48272	0.17478		0.36703	0.00284		0.36703	0.00284
0.42537	2.93634		0.3675	0.00284		0.3675	0.00284
0.70221	0.12879		0.36803	0.00284		0.36803	0.00284
0.70609	0.16141		0.36903	0.00284		0.36903	0.00284
0.39562	0.45556		0.37002	0.00284		0.37002	0.00284
0.42473	9.42096		0.37102	0.00284		0.37102	0.00284
0.4215	1.37891		0.37201	0.00284		0.37201	0.00284
0.43804	0.80001		0.3725	0.00284		0.3725	0.00284
0.43956	0.58461		0.37301	0.00284		0.37301	0.00284
0.42874	0.92654		0.37401	0.00284		0.37401	0.00284
0.41269	8.23576		0.375	0.00284		0.375	0.00284
0.39666	8.95816		0.376	0.00284		0.376	0.00284
0.43347	4.68319		0.37699	0.00284		0.37699	0.00284
0.41351	11.2382		0.3775	0.00284		0.3775	0.00284
0.4142	2.20551		0.37799	0.00284		0.37799	0.00284
0.40862	8.3619		0.37899	0.00284		0.37899	0.00284
0.34397	0.17467		0.37998	0.00284		0.37998	0.00284
0.41536	6.08893		0.38098	0.00284		0.38098	0.00284
0.52117	0.13839		0.38197	0.00284		0.38197	0.00284
0.422	6.25853		0.3825	0.00284		0.3825	0.00284
0.41558	1.41876		0.38297	0.00284		0.38297	0.00284
0.42611	1.24077		0.38397	0.00284		0.38397	0.00284
0.41166	1.18447		0.38496	0.00284		0.38496	0.00284
0.57786	0.10283		0.38596	0.00284		0.38596	0.00284
0.3902	2.50072		0.38695	0.00284		0.38695	0.00284
0.42194	12.6899		0.3875	0.00284		0.3875	0.00284
0.40449	10.676		0.38795	0.00284		0.38795	0.00284
0.41925	7.16297		0.38895	0.00285		0.38895	0.00284
0.41884	8.79913		0.38994	0.00285		0.38994	0.00284
0.41699	12.1017		0.39094	0.00285		0.39094	0.00284
0.41473	0.59986		0.39193	0.00286		0.39193	0.00284
0.42896	0.62833		0.3925	0.00287		0.3925	0.00284
0.71401	0.12429		0.39293	0.00288		0.39293	0.00284
0.41924	1.70489		0.39393	0.00291		0.39393	0.00284
0.64659	0.11951		0.39492	0.00295		0.39492	0.00284
0.65203	0.11184		0.39592	0.00302		0.39592	0.00284
0.44055	0.64202		0.39691	0.00314		0.39691	0.00284
0.44717	0.54004		0.3975	0.00323		0.3975	0.00284
0.42228	3.55636		0.39791	0.00332		0.39791	0.00284
0.37588	0.14613		0.39891	0.00358		0.39891	0.00284
0.47099	4.13868		0.3999	0.00398		0.3999	0.00284
0.40816	5.54815		0.4009	0.00456		0.4009	0.00284
0.41863	7.75459		0.40189	0.00538		0.40189	0.00284
0.42445	8.84224		0.4025	0.00603		0.4025	0.00284
0.40843	3.00661		0.40289	0.00652		0.40289	0.00284
0.69185	0.49972		0.40389	0.00808		0.40389	0.00284
0.40331	6.02581		0.40488	0.01015		0.40488	0.00284
0.41432	3.29774		0.40588	0.01284		0.40588	0.00284
0.19523	0.34815		0.40687	0.01626		0.40687	0.00284
0.42322	1.341		0.4075	0.01883		0.4075	0.00284
0.49361	13.2636		0.40787	0.02052		0.40787	0.00284
0.42119	2.93984		0.40887	0.02567		0.40887	0.00284
0.4199	1.71113		0.40986	0.03178		0.40986	0.00284
0.41811	7.678		0.41086	0.03881		0.41086	0.00284
0.42424	5.15131		0.41185	0.0467		0.41185	0.00284
0.41239	0.78121		0.4125	0.0522		0.4125	0.00284
0.42705	9.03139		0.41285	0.0553		0.41285	0.00284
0.4132	6.53009		0.41385	0.06439		0.41385	0.00284
0.45731	28.8671		0.41484	0.07368		0.41484	0.00284
0.42052	5.45922		0.41584	0.08283		0.41584	0.00284
0.46736	11.036		0.41683	0.09143		0.41683	0.00284
0.44172	0.39863		0.4175	0.09668		0.4175	0.00284
0.50457	0.15402		0.41783	0.09909		0.41783	0.00284
0.42334	0.69021		0.41883	0.10541		0.41883	0.00284
0.4681	0.18248		0.41982	0.11007		0.41982	0.00284
0.40397	1.44198		0.42082	0.11281		0.42082	0.00284
0.57421	0.26063		0.42181	0.11347		0.42181	0.00284
0.42665	0.12204		0.4225	0.11269		0.4225	0.00284
0.69737	0.12018		0.42281	0.11201		0.42281	0.00284
0.46083	3.37102		0.42381	0.10852		0.42381	0.00284
0.41031	1.93823		0.4248	0.10319		0.4248	0.00284
0.43491	1.75587		0.4258	0.09631		0.4258	0.00284
0.46212	0.15789		0.42679	0.08824		0.42679	0.00284
0.42407	7.87631		0.4275	0.08203		0.4275	0.00284
0.41649	3.90741		0.42779	0.07939		0.42779	0.00284
0.41851	3.20791		0.42879	0.07015		0.42879	0.00284
0.41617	9.57316		0.42978	0.06089		0.42978	0.00284
0.42619	9.11737		0.43078	0.05195		0.43078	0.00284
0.59346	4.41338		0.43177	0.0436		0.43177	0.00284
0.41804	2.11443		0.4325	0.038		0.4325	0.00284
0.41594	8.26067		0.43277	0.03602		0.43277	0.00284
0.47499	0.83169		0.43377	0.02934		0.43377	0.00284
0.42242	0.89434		0.43476	0.0236		0.43476	0.00284
0.46981	1.8318		0.43576	0.01879		0.43576	0.00284
0.42577	10.1945		0.43675	0.01487		0.43675	0.00284
0.42116	5.20853		0.4375	0.01245		0.4375	0.00284
0.4731	0.26327		0.43775	0.01173		0.43775	0.00284
0.42576	0.80614		0.43875	0.00929		0.43875	0.00284
0.46701	11.9838		0.43974	0.00743		0.43974	0.00284
0.71517	0.14798		0.44074	0.00605		0.44074	0.00284
0.40814	7.3114		0.44173	0.00504		0.44173	0.00284
0.47606	0.22643		0.4425	0.00446		0.4425	0.00284
0.41965	9.92307		0.44273	0.00431		0.44273	0.00284
0.41339	13.6425		0.44373	0.00381		0.44373	0.00285
0.46065	8.85495		0.44472	0.00347		0.44472	0.00285
0.42481	6.83551		0.44572	0.00324		0.44572	0.00286
0.42513	0.40749		0.44671	0.00309		0.44671	0.00288
0.41752	6.12784		0.4475	0.00301		0.4475	0.0029
0.42019	9.37724		0.44771	0.00299		0.44771	0.0029
0.42619	4.1424		0.44871	0.00293		0.44871	0.00294
0.59769	0.12999		0.4497	0.00289		0.4497	0.00301
0.4164	7.01071		0.4507	0.00287		0.4507	0.00311
0.42623	4.33164		0.45169	0.00286		0.45169	0.00325
0.43715	1.08832		0.4525	0.00285		0.4525	0.00342
0.46119	4.23642		0.45269	0.00285		0.45269	0.00346
0.4266	2.26683		0.45369	0.00285		0.45369	0.00375
0.41577	15.0844		0.45468	0.00284		0.45468	0.00414
0.37855	0.20325		0.45568	0.00284		0.45568	0.00465
0.39733	4.31526		0.45667	0.00284		0.45667	0.00529
0.42788	0.8474		0.4575	0.00284		0.4575	0.00592
0.41267	3.99533		0.45767	0.00284		0.45767	0.00606
0.42545	8.57349		0.45867	0.00284		0.45867	0.00696
0.46159	1.98254		0.45966	0.00284		0.45966	0.00797
0.41296	0.95221		0.46066	0.00284		0.46066	0.00905
0.41646	0.96601		0.46165	0.00284		0.46165	0.01016
0.40735	14.1659		0.4625	0.00284		0.4625	0.01108
0.41344	3.01205		0.46265	0.00284		0.46265	0.01123
0.43166	0.48772		0.46365	0.00284		0.46365	0.0122
0.44141	0.18761		0.46464	0.00284		0.46464	0.013
0.497	0.11813		0.46564	0.00284		0.46564	0.01356
0.3974	6.89901		0.46663	0.00284		0.46663	0.01385
0.41304	6.45456		0.4675	0.00284		0.4675	0.01386
0.41356	9.12498		0.46763	0.00284		0.46763	0.01384
0.42447	9.89957		0.46863	0.00284		0.46863	0.01354
0.68356	0.11623		0.46962	0.00284		0.46962	0.01295
0.41359	3.71401		0.47062	0.00284		0.47062	0.01214
0.41461	8.67158		0.47161	0.00284		0.47161	0.01117
0.46715	0.5838		0.4725	0.00284		0.4725	0.01021
0.42432	7.72949		0.47261	0.00284		0.47261	0.01009
0.42332	0.58785		0.47361	0.00284		0.47361	0.00898
0.42184	8.61575		0.4746	0.00284		0.4746	0.0079
0.44727	0.40401		0.4756	0.00284		0.4756	0.0069
0.42425	0.6397		0.47659	0.00284		0.47659	0.006
0.42896	1.92267		0.4775	0.00284		0.4775	0.0053
0.41461	1.13496		0.47759	0.00284		0.47759	0.00524
0.42712	3.71947		0.47859	0.00284		0.47859	0.00461
0.41464	3.04239		0.47958	0.00284		0.47958	0.00411
0.61239	0.12218		0.48058	0.00284		0.48058	0.00373
0.4111	0.23384		0.48157	0.00284		0.48157	0.00345
0.42317	3.5926		0.4825	0.00284		0.4825	0.00325
0.42828	1.19478		0.48257	0.00284		0.48257	0.00324
0.45573	5.56375		0.48357	0.00284		0.48357	0.0031
0.48343	0.13756		0.48456	0.00284		0.48456	0.003
0.40823	0.90255		0.48556	0.00284		0.48556	0.00294
0.42699	0.42283		0.48655	0.00284		0.48655	0.0029
0.40884	7.72671		0.4875	0.00284		0.4875	0.00288
0.42447	10.6115		0.48755	0.00284		0.48755	0.00288
0.41668	4.00405		0.48855	0.00284		0.48855	0.00286
0.41937	3.22706		0.48954	0.00284		0.48954	0.00285
0.39368	0.11425		0.49054	0.00284		0.49054	0.00285
0.42257	9.91107		0.49153	0.00284		0.49153	0.00284
0.45994	5.44903		0.4925	0.00284		0.4925	0.00284
0.43292	0.65612		0.49253	0.00284		0.49253	0.00284
0.42572	0.73436		0.49353	0.00284		0.49353	0.00284
0.42756	2.42315		0.49452	0.00284		0.49452	0.00284
0.40888	2.44738		0.49552	0.00284		0.49552	0.00284
0.42426	1.70992		0.49651	0.00284		0.49651	0.00284
0.42431	6.95023		0.4975	0.00284		0.4975	0.00284
0.40172	1.64189		0.49751	0.00284		0.49751	0.00284
0.43137	3.05384		0.49851	0.00284		0.49851	0.00284
0.40684	1.57482		0.4995	0.00284		0.4995	0.00284
0.40555	3.28231		0.5005	0.00284		0.5005	0.00284
0.46504	0.15844		0.50149	0.00284		0.50149	0.00284
0.42347	1.23611		0.50249	0.00284		0.50249	0.00284
0.41621	3.29464		0.5025	0.00284		0.5025	0.00284
0.42647	5.69324		0.50349	0.00284		0.50349	0.00284
0.42123	6.10672		0.50448	0.00284		0.50448	0.00284
0.41362	3.84799		0.50548	0.00284		0.50548	0.00284
0.42289	3.80872		0.50647	0.00284		0.50647	0.00284
0.50975	0.11687		0.50747	0.00284		0.50747	0.00284
0.43267	0.14602		0.5075	0.00284		0.5075	0.00284
0.41394	1.17277		0.50847	0.00284		0.50847	0.00284
0.4218	4.07821		0.50946	0.00284		0.50946	0.00284
0.41931	6.2108		0.51046	0.00284		0.51046	0.00284
0.48229	39.5283		0.51145	0.00284		0.51145	0.00284
0.35319	5.18142		0.51245	0.00284		0.51245	0.00284
0.46241	1.23538		0.5125	0.00284		0.5125	0.00284
0.16469	0.2513		0.51345	0.00284		0.51345	0.00284
0.47186	6.40853		0.51444	0.00284		0.51444	0.00284
0.59302	0.32811		0.51544	0.00284		0.51544	0.00284
0.41142	2.12108		0.51643	0.00284		0.51643	0.00284
0.43078	7.81981		0.51743	0.00284		0.51743	0.00284
0.65196	0.20697		0.5175	0.00284		0.5175	0.00284
0.4256	1.40294		0.51843	0.00284		0.51843	0.00284
0.42469	1.26923		0.51942	0.00284		0.51942	0.00284
0.41885	18.0125		0.52042	0.00284		0.52042	0.00284
0.40902	14.2057		0.52141	0.00284		0.52141	0.00284
0.42099	9.25931		0.52241	0.00284		0.52241	0.00284
0.41561	6.82153		0.5225	0.00284		0.5225	0.00284
0.70938	0.13108		0.52341	0.00284		0.52341	0.00284
0.36503	5.14412		0.5244	0.00284		0.5244	0.00284
0.42217	1.55074		0.5254	0.00284		0.5254	0.00284
0.68954	0.16713		0.52639	0.00284		0.52639	0.00284
0.4236	3.22201		0.52739	0.00284		0.52739	0.00284
0.42851	3.30089		0.5275	0.00284		0.5275	0.00284
0.59125	0.20168		0.52839	0.00284		0.52839	0.00284
0.42735	1.10599		0.52938	0.00284		0.52938	0.00284
0.67156	0.21902		0.53038	0.00284		0.53038	0.00284
0.42926	7.72498		0.53137	0.00284		0.53137	0.00284
0.41777	6.50695		0.53237	0.00284		0.53237	0.00284
0.40087	0.50152		0.5325	0.00284		0.5325	0.00284
0.66942	0.33267		0.53337	0.00284		0.53337	0.00284
0.41119	3.41872		0.53436	0.00284		0.53436	0.00284
0.65642	0.12369		0.53536	0.00284		0.53536	0.00284
0.42369	15.9276		0.53635	0.00284		0.53635	0.00284
0.41906	3.24204		0.53735	0.00284		0.53735	0.00284
0.42665	1.588		0.5375	0.00284		0.5375	0.00284
0.41702	9.47766		0.53835	0.00284		0.53835	0.00284
0.40974	2.4914		0.53934	0.00284		0.53934	0.00284
0.42337	6.13452		0.54034	0.00284		0.54034	0.00284
0.41596	3.09569		0.54133	0.00284		0.54133	0.00284
0.41073	1.25369		0.54233	0.00284		0.54233	0.00284
0.65511	0.15745		0.5425	0.00284		0.5425	0.00284
0.42205	5.58982		0.54333	0.00284		0.54333	0.00284
0.41852	7.039		0.54432	0.00284		0.54432	0.00284
0.41607	1.15241		0.54532	0.00284		0.54532	0.00284
0.4285	13.2126		0.54631	0.00284		0.54631	0.00284
0.58125	0.11755		0.54731	0.00284		0.54731	0.00284
0.32186	6.09204		0.5475	0.00284		0.5475	0.00284
0.43012	0.72577		0.54831	0.00284		0.54831	0.00284
0.42322	0.64748		0.5493	0.00284		0.5493	0.00284
0.41376	11.9784		0.5503	0.00284		0.5503	0.00284
0.42169	11.0317		0.55129	0.00284		0.55129	0.00284
0.42464	6.03568		0.55229	0.00284		0.55229	0.00284
0.41005	4.06316		0.5525	0.00284		0.5525	0.00284
0.43383	0.48022		0.55329	0.00284		0.55329	0.00284
0.4198	2.72725		0.55428	0.00284		0.55428	0.00284
0.46023	1.23088		0.55528	0.00284		0.55528	0.00284
0.42131	8.96239		0.55627	0.00284		0.55627	0.00284
0.4162	4.95868		0.55727	0.00284		0.55727	0.00284
0.41238	0.5919		0.5575	0.00284		0.5575	0.00284
0.42171	11.9524		0.55827	0.00284		0.55827	0.00284
0.42154	11.0387		0.55926	0.00284		0.55926	0.00284
0.5013	0.11792		0.56026	0.00284		0.56026	0.00284
0.46583	1.8053		0.56125	0.00284		0.56125	0.00284
0.41791	4.91171		0.56225	0.00284		0.56225	0.00284
0.42432	0.45039		0.5625	0.00284		0.5625	0.00284
0.42212	4.2159		0.56325	0.00284		0.56325	0.00284
0.41852	8.81255		0.56424	0.00284		0.56424	0.00284
0.42488	6.76982		0.56524	0.00284		0.56524	0.00284
0.4223	4.82757		0.56623	0.00284		0.56623	0.00284
0.41512	2.07683		0.56723	0.00284		0.56723	0.00284
0.46668	0.61098		0.5675	0.00284		0.5675	0.00284
0.66046	0.10396		0.56823	0.00284		0.56823	0.00284
0.42325	6.97955		0.56922	0.00284		0.56922	0.00284
0.41173	3.14724		0.57022	0.00284		0.57022	0.00284
0.45862	0.40515		0.57121	0.00284		0.57121	0.00284
0.42737	3.1334		0.57221	0.00284		0.57221	0.00284
0.4265	0.64345		0.5725	0.00284		0.5725	0.00284
0.41336	3.72262		0.57321	0.00284		0.57321	0.00284
0.49601	0.21473		0.5742	0.00284		0.5742	0.00284
0.42986	8.23559		0.5752	0.00284		0.5752	0.00284
0.42249	17.606		0.57619	0.00284		0.57619	0.00284
0.42911	0.33521		0.57719	0.00284		0.57719	0.00284
0.42753	0.63921		0.5775	0.00284		0.5775	0.00284
0.4494	0.36822		0.57819	0.00284		0.57819	0.00284
0.39833	0.10311		0.57918	0.00284		0.57918	0.00284
0.45522	12.3108		0.58018	0.00284		0.58018	0.00284
0.41447	2.60815		0.58117	0.00284		0.58117	0.00284
0.40126	3.96411		0.58217	0.00284		0.58217	0.00284
0.4275	1.05041		0.5825	0.00284		0.5825	0.00284
0.42404	1.13048		0.58317	0.00284		0.58317	0.00284
0.42624	3.65221		0.58416	0.00284		0.58416	0.00284
0.4238	9.53016		0.58516	0.00284		0.58516	0.00284
0.44825	1.48436		0.58615	0.00284		0.58615	0.00284
0.40938	1.63214		0.58715	0.00284		0.58715	0.00284
0.46881	0.95504		0.5875	0.00284		0.5875	0.00284
0.41515	3.85146		0.58815	0.00284		0.58815	0.00284
0.42317	0.78332		0.58914	0.00284		0.58914	0.00284
0.41195	1.48392		0.59014	0.00284		0.59014	0.00284
0.41199	3.61524		0.59113	0.00284		0.59113	0.00284
0.54029	0.7701		0.59213	0.00284		0.59213	0.00284
0.41569	11.8614		0.5925	0.00284		0.5925	0.00284
0.41755	1.29415		0.59313	0.00284		0.59313	0.00284
0.41706	9.71719		0.59412	0.00284		0.59412	0.00284
0.60674	0.35611		0.59512	0.00284		0.59512	0.00284
0.42101	1.45916		0.59611	0.00284		0.59611	0.00284
0.41882	0.94599		0.59711	0.00284		0.59711	0.00284
0.71559	0.11008		0.5975	0.00284		0.5975	0.00284
0.46439	12.8333		0.59811	0.00284		0.59811	0.00284
0.72249	0.10413		0.5991	0.00284		0.5991	0.00284
0.42794	14.7091		0.6001	0.00284		0.6001	0.00284
0.42435	3.47874		0.60109	0.00284		0.60109	0.00284
0.42009	1.90297		0.60209	0.00284		0.60209	0.00284
0.43686	2.54518		0.6025	0.00284		0.6025	0.00284
0.42508	1.81758		0.60309	0.00284		0.60309	0.00284
0.59346	0.35409		0.60408	0.00284		0.60408	0.00284
0.44125	0.54303		0.60508	0.00284		0.60508	0.00284
0.6293	0.26881		0.60607	0.00284		0.60607	0.00284
0.43019	5.71966		0.60707	0.00284		0.60707	0.00284
0.42767	12.0345		0.6075	0.00284		0.6075	0.00284
0.4137	10.1706		0.60807	0.00284		0.60807	0.00284
0.41717	2.40337		0.60906	0.00284		0.60906	0.00284
0.42438	2.67138		0.61006	0.00284		0.61006	0.00284
0.41748	1.8023		0.61105	0.00284		0.61105	0.00284
0.42266	7.67465		0.61205	0.00284		0.61205	0.00284
0.63714	0.15119		0.6125	0.00284		0.6125	0.00284
0.45932	5.86431		0.61305	0.00284		0.61305	0.00284
0.41474	4.41634		0.61404	0.00284		0.61404	0.00284
0.43533	0.79745		0.61504	0.00284		0.61504	0.00284
0.43506	1.90976		0.61603	0.00284		0.61603	0.00284
0.41714	1.19081		0.61703	0.00284		0.61703	0.00284
0.41238	5.82369		0.6175	0.00284		0.6175	0.00284
0.42088	6.60733		0.61803	0.00284		0.61803	0.00284
0.41497	3.048		0.61902	0.00284		0.61902	0.00284
0.43182	1.51558		0.62002	0.00284		0.62002	0.00284
0.42148	8.30301		0.62101	0.00284		0.62101	0.00284
0.42659	12.5079		0.62201	0.00284		0.62201	0.00284
0.42301	0.38815		0.6225	0.00284		0.6225	0.00284
0.4178	9.25889		0.62301	0.00284		0.62301	0.00284
0.46886	9.21929		0.624	0.00284		0.624	0.00284
0.42909	0.41869		0.625	0.00284		0.625	0.00284
0.41814	4.72247		0.62599	0.00284		0.62599	0.00284
0.41537	8.61601		0.62699	0.00284		0.62699	0.00284
0.40263	1.79287		0.6275	0.00284		0.6275	0.00284
0.46263	0.43527		0.62799	0.00284		0.62799	0.00284
0.41556	3.66242		0.62898	0.00284		0.62898	0.00284
0.42039	5.56335		0.62998	0.00284		0.62998	0.00284
0.43296	0.62014		0.63097	0.00284		0.63097	0.00284
0.42965	2.14521		0.63197	0.00284		0.63197	0.00284
0.29504	0.15556		0.6325	0.00284		0.6325	0.00284
0.42023	11.6475		0.63297	0.00284		0.63297	0.00284
0.41168	4.59254		0.63396	0.00284		0.63396	0.00284
0.40665	5.22703		0.63496	0.00284		0.63496	0.00284
0.4189	1.60584		0.63595	0.00284		0.63595	0.00284
0.42394	0.9508		0.63695	0.00284		0.63695	0.00284
0.41012	7.65169		0.6375	0.00284		0.6375	0.00284
0.41419	11.1282		0.63795	0.00284		0.63795	0.00284
0.42423	1.21155		0.63894	0.00284		0.63894	0.00284
0.42895	6.73111		0.63994	0.00284		0.63994	0.00284
0.41748	6.20979		0.64093	0.00284		0.64093	0.00284
0.46502	6.33049		0.64193	0.00284		0.64193	0.00284
0.41785	11.0798		0.6425	0.00284		0.6425	0.00284
0.42997	2.55222		0.64293	0.00284		0.64293	0.00284
0.68408	0.14428		0.64392	0.00284		0.64392	0.00284
0.4177	2.47923		0.64492	0.00284		0.64492	0.00284
0.41878	1.3913		0.64591	0.00284		0.64591	0.00284
0.41605	1.84094		0.64691	0.00284		0.64691	0.00284
0.41586	12.5677		0.6475	0.00284		0.6475	0.00284
0.42115	5.9301		0.64791	0.00284		0.64791	0.00284
0.64908	0.31649		0.6489	0.00284		0.6489	0.00284
0.4289	0.75637		0.6499	0.00284		0.6499	0.00284
0.40031	0.26672		0.65089	0.00284		0.65089	0.00284
0.42118	28.9475		0.65189	0.00284		0.65189	0.00284
0.41163	10.5141		0.6525	0.00284		0.6525	0.00284
0.42515	3.29678		0.65289	0.00284		0.65289	0.00284
0.76233	0.19582		0.65388	0.00284		0.65388	0.00284
0.42162	0.67884		0.65488	0.00284		0.65488	0.00284
0.41683	3.6831		0.65587	0.00284		0.65587	0.00284
0.63486	0.13371		0.65687	0.00284		0.65687	0.00284
0.66271	0.14627		0.6575	0.00284		0.6575	0.00284
0.42208	10.907		0.65787	0.00284		0.65787	0.00284
0.37375	1.30889		0.65886	0.00284		0.65886	0.00284
0.4243	7.12384		0.65986	0.00284		0.65986	0.00284
0.6509	0.12644		0.66085	0.00284		0.66085	0.00284
0.41514	11.8191		0.66185	0.00284		0.66185	0.00284
0.30889	0.18124		0.6625	0.00284		0.6625	0.00284
0.41073	6.28586		0.66285	0.00284		0.66285	0.00284
0.41199	4.915		0.66384	0.00284		0.66384	0.00284
0.41325	13.3001		0.66484	0.00284		0.66484	0.00284
0.66383	0.12344		0.66583	0.00284		0.66583	0.00284
0.44659	6.45557		0.66683	0.00284		0.66683	0.00284
0.41842	4.01072		0.6675	0.00284		0.6675	0.00284
0.4751	7.47577		0.66783	0.00284		0.66783	0.00284
0.41535	2.2323		0.66882	0.00284		0.66882	0.00284
0.42332	3.22416		0.66982	0.00284		0.66982	0.00284
0.43866	0.56525		0.67081	0.00284		0.67081	0.00284
0.42071	3.69256		0.67181	0.00284		0.67181	0.00284
0.41784	10.0242		0.6725	0.00284		0.6725	0.00284
0.42326	1.31268		0.67281	0.00284		0.67281	0.00284
0.42306	0.53811		0.6738	0.00284		0.6738	0.00284
0.4095	9.30545		0.6748	0.00284		0.6748	0.00284
0.46459	0.39402		0.67579	0.00284		0.67579	0.00284
0.65297	0.13027		0.67679	0.00284		0.67679	0.00284
0.41274	6.45541		0.6775	0.00284		0.6775	0.00284
0.42444	8.81303		0.67779	0.00284		0.67779	0.00284
0.40922	1.63844		0.67878	0.00284		0.67878	0.00284
0.41801	11.5717		0.67978	0.00284		0.67978	0.00284
0.41403	5.0522		0.68077	0.00284		0.68077	0.00284
0.62153	0.19228		0.68177	0.00284		0.68177	0.00284
0.42872	0.79549		0.6825	0.00284		0.6825	0.00284
0.61041	0.22315		0.68277	0.00284		0.68277	0.00284
0.42203	9.50336		0.68376	0.00284		0.68376	0.00284
0.39759	10.9023		0.68476	0.00284		0.68476	0.00284
0.42639	1.61494		0.68575	0.00284		0.68575	0.00284
0.47584	1.24646		0.68675	0.00284		0.68675	0.00284
0.45005	0.31048		0.6875	0.00284		0.6875	0.00284
0.60007	0.10528		0.68775	0.00284		0.68775	0.00284
0.69634	0.12242		0.68874	0.00284		0.68874	0.00284
0.41975	12.22		0.68974	0.00284		0.68974	0.00284
0.46878	0.20303		0.69073	0.00284		0.69073	0.00284
0.42862	1.33419		0.69173	0.00284		0.69173	0.00284
0.42448	6.93122		0.6925	0.00284		0.6925	0.00284
0.46542	10.8492		0.69273	0.00284		0.69273	0.00284
0.68277	0.14646		0.69372	0.00284		0.69372	0.00284
0.40559	2.36815		0.69472	0.00284		0.69472	0.00284
0.42545	0.43035		0.69571	0.00284		0.69571	0.00284
0.63504	0.19111		0.69671	0.00284		0.69671	0.00284
0.42094	4.64842		0.6975	0.00284		0.6975	0.00284
0.40521	6.583		0.69771	0.00284		0.69771	0.00284
0.40964	1.79197		0.6987	0.00284		0.6987	0.00284
0.41865	2.26938		0.6997	0.00284		0.6997	0.00284
0.61376	0.13058		0.70069	0.00284		0.70069	0.00284
0.52625	0.13081		0.70169	0.00284		0.70169	0.00284
0.4158	1.19518		0.7025	0.00284		0.7025	0.00284
0.41978	12.9958		0.70269	0.00284		0.70269	0.00284
0.41395	4.73114		0.70368	0.00284		0.70368	0.00284
0.41564	12.1912		0.70468	0.00284		0.70468	0.00284
0.41383	1.81346		0.70567	0.00284		0.70567	0.00284
0.42476	4.89101		0.70667	0.00284		0.70667	0.00284
0.42082	3.52655		0.7075	0.00284		0.7075	0.00284
0.41888	1.20703		0.70767	0.00284		0.70767	0.00284
0.41196	0.89869		0.70866	0.00284		0.70866	0.00284
0.41884	7.86614		0.70966	0.00284		0.70966	0.00284
0.43531	0.75889		0.71065	0.00284		0.71065	0.00284
0.41832	5.42016		0.71165	0.00284		0.71165	0.00284
0.45928	3.93397		0.7125	0.00284		0.7125	0.00284
0.42135	5.05863		0.71265	0.00284		0.71265	0.00284
0.42572	2.99168		0.71364	0.00284		0.71364	0.00284
0.42418	0.79605		0.71464	0.00284		0.71464	0.00284
0.7128	0.15398		0.71563	0.00284		0.71563	0.00284
0.43001	2.46614		0.71663	0.00284		0.71663	0.00284
0.4181	2.55657		0.7175	0.00284		0.7175	0.00284
0.40659	0.66326		0.71763	0.00284		0.71763	0.00284
0.41959	22.29		0.71862	0.00284		0.71862	0.00284
0.41583	3.2544		0.71962	0.00284		0.71962	0.00284
0.41552	5.55485		0.72061	0.00284		0.72061	0.00284
0.42106	6.15644		0.72161	0.00284		0.72161	0.00284
0.42055	4.91004		0.7225	0.00284		0.7225	0.00284
0.42076	5.41563		0.72261	0.00284		0.72261	0.00284
0.42561	8.04052		0.7236	0.00284		0.7236	0.00284
0.41727	2.10627		0.7246	0.00284		0.7246	0.00284
0.50661	0.10131		0.72559	0.00284		0.72559	0.00284
0.42004	1.1146		0.72659	0.00284		0.72659	0.00284
0.57916	0.21383		0.7275	0.00284		0.7275	0.00284
0.43207	0.53695		0.72759	0.00284		0.72759	0.00284
0.4152	2.23682		0.72858	0.00284		0.72858	0.00284
0.43545	0.60426		0.72958	0.00284		0.72958	0.00284
0.42004	4.74825		0.73057	0.00284		0.73057	0.00284
0.42082	0.95395		0.73157	0.00284		0.73157	0.00284
0.43375	1.5885		0.7325	0.00284		0.7325	0.00284
0.41301	7.46378		0.73257	0.00284		0.73257	0.00284
0.42718	0.25583		0.73356	0.00284		0.73356	0.00284
0.4514	17.4936		0.73456	0.00284		0.73456	0.00284
0.42656	5.34677		0.73555	0.00284		0.73555	0.00284
0.42956	10.268		0.73655	0.00284		0.73655	0.00284
0.41272	6.84575		0.7375	0.00284		0.7375	0.00284
0.45243	0.32735		0.73755	0.00284		0.73755	0.00284
0.42977	0.67385		0.73854	0.00284		0.73854	0.00284
0.46675	8.54841		0.73954	0.00284		0.73954	0.00284
0.66303	0.1312		0.74053	0.00284		0.74053	0.00284
0.46648	1.98039		0.74153	0.00284		0.74153	0.00284
0.42158	2.38389		0.7425	0.00284		0.7425	0.00284
0.42475	16.0047		0.74253	0.00284		0.74253	0.00284
0.42362	2.55712		0.74352	0.00284		0.74352	0.00284
0.42132	3.97875		0.74452	0.00284		0.74452	0.00284
0.41891	12.3532		0.74551	0.00284		0.74551	0.00284
0.41426	6.3018		0.74651	0.00284		0.74651	0.00284
0.42137	15.8404		0.7475	0.00284		0.7475	0.00284
0.42191	10.2064		0.74751	0.00284		0.74751	0.00284
0.46078	1.73213		0.7485	0.00284		0.7485	0.00284
0.41007	5.34312		0.7495	0.00284		0.7495	0.00284
0.41799	7.54435		0.75049	0.00284		0.75049	0.00284
0.51683	0.19768		0.75149	0.00284		0.75149	0.00284
0.41881	2.73188		0.75248	0.00284		0.75248	0.00284
0.42061	5.73608		0.7525	0.00284		0.7525	0.00284
0.61125	0.17421		0.75348	0.00284		0.75348	0.00284
0.42699	15.1188		0.75448	0.00284		0.75448	0.00284
0.42626	4.12953		0.75547	0.00284		0.75547	0.00284
0.40586	7.30909		0.75647	0.00284		0.75647	0.00284
0.42613	4.9042		0.75746	0.00284		0.75746	0.00284
0.42206	5.61094		0.7575	0.00284		0.7575	0.00284
0.42399	2.85241		0.75846	0.00284		0.75846	0.00284
0.4105	3.08072		0.75946	0.00284		0.75946	0.00284
0.42352	15.0411		0.76045	0.00284		0.76045	0.00284
0.60707	0.33445		0.76145	0.00284		0.76145	0.00284
0.6176	0.15243		0.76244	0.00284		0.76244	0.00284
0.66119	0.18789		0.7625	0.00284		0.7625	0.00284
0.42001	4.95061		0.76344	0.00284		0.76344	0.00284
0.46681	0.1867		0.76444	0.00284		0.76444	0.00284
0.39602	2.86633		0.76543	0.00284		0.76543	0.00284
0.41962	6.17706		0.76643	0.00284		0.76643	0.00284
0.42761	1.80708		0.76742	0.00284		0.76742	0.00284
0.42247	7.11099		0.7675	0.00284		0.7675	0.00284
0.4223	1.10792		0.76842	0.00284		0.76842	0.00284
0.4205	2.96194		0.76942	0.00284		0.76942	0.00284
0.4174	5.59539		0.77041	0.00284		0.77041	0.00284
0.42526	2.11907		0.77141	0.00284		0.77141	0.00284
0.41835	17.2425		0.7724	0.00284		0.7724	0.00284
0.4092	7.55628		0.7725	0.00284		0.7725	0.00284
0.4215	1.42726		0.7734	0.00284		0.7734	0.00284
0.49923	0.10626		0.7744	0.00284		0.7744	0.00284
0.47052	9.15061		0.77539	0.00284		0.77539	0.00284
0.42227	2.91085		0.77639	0.00284		0.77639	0.00284
0.373	0.17069		0.77738	0.00284		0.77738	0.00284
0.42334	2.26338		0.7775	0.00284		0.7775	0.00284
0.78316	0.10939		0.77838	0.00284		0.77838	0.00284
0.62771	0.14332		0.77938	0.00284		0.77938	0.00284
0.41592	5.10387		0.78037	0.00284		0.78037	0.00284
0.41306	10.1469		0.78137	0.00284		0.78137	0.00284
0.42138	2.03147		0.78236	0.00284		0.78236	0.00284
0.42233	1.20336		0.7825	0.00284		0.7825	0.00284
0.16573	0.21864		0.78336	0.00284		0.78336	0.00284
0.55992	0.12945		0.78436	0.00284		0.78436	0.00284
0.60496	0.10681		0.78535	0.00284		0.78535	0.00284
0.4261	1.45842		0.78635	0.00284		0.78635	0.00284
0.42726	1.97694		0.78734	0.00284		0.78734	0.00284
0.41122	2.88733		0.7875	0.00284		0.7875	0.00284
0.4203	8.32963		0.78834	0.00284		0.78834	0.00284
0.43304	1.3195		0.78934	0.00284		0.78934	0.00284
0.42188	3.79328		0.79033	0.00284		0.79033	0.00284
0.46472	7.84801		0.79133	0.00284		0.79133	0.00284
0.76932	0.10162		0.79232	0.00284		0.79232	0.00284
0.72994	0.11722		0.7925	0.00284		0.7925	0.00284
0.41562	0.54551		0.79332	0.00284		0.79332	0.00284
0.4661	11.6904		0.79432	0.00284		0.79432	0.00284
0.61098	0.10198		0.79531	0.00284		0.79531	0.00284
0.42121	1.23934		0.79631	0.00284		0.79631	0.00284
0.41765	1.29764		0.7973	0.00284		0.7973	0.00284
0.43466	1.65798		0.7975	0.00284		0.7975	0.00284
0.74084	0.11592		0.7983	0.00284		0.7983	0.00284
0.42555	2.58701		0.7993	0.00284		0.7993	0.00284
0.5055	0.18619		0.80029	0.00284		0.80029	0.00284
0.5203	0.11921		0.8025	0.00284		0.8025	0.00284
0.6572	0.12153		0.8075	0.00284		0.8075	0.00284
0.40738	13.011		0.8125	0.00284		0.8125	0.00284
0.42229	2.94635		0.8175	0.00284		0.8175	0.00284
0.41973	1.87776		0.8225	0.00284		0.8225	0.00284
0.41093	3.68256		0.8275	0.00284		0.8275	0.00284
0.40547	0.68447		0.8325	0.00284		0.8325	0.00284
0.4131	1.74647		0.8375	0.00284		0.8375	0.00284
0.42091	5.30372		0.8425	0.00284		0.8425	0.00284
0.44384	0.10271		0.8475	0.00284		0.8475	0.00284
0.45692	0.21398		0.8525	0.00284		0.8525	0.00284
0.59979	0.11277		0.8575	0.00284		0.8575	0.00284
0.7502	0.14088		0.8625	0.00284		0.8625	0.00284
0.42841	2.63355		0.8675	0.00284		0.8675	0.00284
0.42553	20.4554		0.8725	0.00284		0.8725	0.00284
0.66916	0.1831		0.8775	0.00284		0.8775	0.00284
0.41963	0.48069		0.8825	0.00284		0.8825	0.00284
0.40221	3.49112		0.8875	0.00284		0.8875	0.00284
0.41976	4.65807		0.8925	0.00284		0.8925	0.00284
0.42117	0.77211		0.8975	0.00284		0.8975	0.00284
0.61034	0.14572		0.9025	0.00284		0.9025	0.00284
0.45813	14.9557		0.9075	0.00284		0.9075	0.00284
0.42506	3.0275		0.9125	0.00284		0.9125	0.00284
0.47135	2.49062		0.9175	0.00284		0.9175	0.00284
0.42055	1.36682		0.9225	0.00284		0.9225	0.00284
0.42211	0.43964		0.9275	0.00284		0.9275	0.00284
0.42807	1.16507		0.9325	0.00284		0.9325	0.00284
0.43975	0.71849		0.9375	0.00284		0.9375	0.00284
0.45133	0.13692		0.9425	0.00284		0.9425	0.00284
0.41851	3.24037		0.9475	0.00284		0.9475	0.00284
0.41272	3.96623		0.9525	0.00284		0.9525	0.00284
0.42507	2.38513		0.9575	0.00284		0.9575	0.00284
0.41636	0.12134		0.9625	0.00284		0.9625	0.00284
0.41617	4.01553		0.9675	0.00284		0.9675	0.00284
0.42643	2.44779		0.9725	0.00284		0.9725	0.00284
0.4311	2.63953		0.9775	0.00284		0.9775	0.00284
0.42621	14.744		0.9825	0.00284		0.9825	0.00284
0.43709	1.15017		0.9875	0.00284		0.9875	0.00284
0.41833	5.77106		0.9925	0.00284		0.9925	0.00284
0.4213	7.11608		0.9975	0.00284		0.9975	0.00284
0.7287	0.12754
0.40924	3.18645
0.40366	2.27386
0.42033	2.83978
0.53532	0.12623
0.41346	0.86898
0.41145	3.35833
0.41474	5.17379
0.41713	3.90757
0.42072	6.04568
0.3567	0.23008
0.42992	2.35474
0.41816	17.7064
0.41309	1.67918
0.4292	5.90712
0.40535	6.27398
0.47029	0.68116
0.41785	4.35685
0.41557	6.00723
0.60987	0.15454
0.41795	4.25787
0.422	4.91668
0.41286	1.29982
0.42352	0.33425
0.72108	0.20738
0.40898	1.34821
0.64746	0.23311
0.42047	5.85083
0.70421	0.11332
0.64456	0.25686
0.42014	2.12352
0.4187	17.579
0.42262	2.31621
0.42766	7.18399
0.41922	2.52779
0.43539	0.54915
0.41838	6.57905
0.45063	0.67063
0.41322	1.49082
0.45216	19.5775
0.42449	1.08228
0.65907	0.12336
0.41088	2.24911
0.41404	2.11541
0.6358	0.13446
0.70017	0.10827
0.43333	0.65198
0.4195	5.23255
0.4293	14.8916
0.465	2.51342
0.66233	0.10685
0.4187	7.48219
0.45269	0.37181
0.42026	4.18013
0.42242	15.1669
0.41045	3.82867
0.41667	10.3921
0.42677	2.68295
0.46383	0.12279
0.41977	3.50337
0.43452	1.40213
0.42563	3.73798
0.42526	0.40676
0.41486	0.65496
0.41712	5.65611
0.47019	19.8986
0.41313	5.89188
0.4185	6.93106
0.42146	1.2504
0.4145	12.0222
0.41388	10.2347
0.3994	17.4706
0.43035	0.31949
0.70661	0.1127
0.42824	1.65303
0.39565	0.44769
0.4985	0.14543
0.42492	5.14737
0.41764	1.68285
0.42187	0.49633
0.42101	1.82784
0.42984	3.56189
0.41247	7.55137
0.40932	3.30757
0.41775	8.06426
0.41763	3.56379
0.46742	2.39737
0.42662	15.8094
0.66102	0.12967
0.59438	0.39218
0.54825	0.1259
0.46869	2.1356
0.4276	0.77448
0.43484	13.3157
0.42247	3.89806
0.39426	0.33517
0.41336	2.82798
0.4257	7.72306
0.41558	3.7706
0.42236	7.27919
0.42046	4.3499
0.47491	2.68299
0.41592	1.93135
0.42121	4.06802
0.42099	0.75874
0.42843	0.38461
0.28541	0.13915
0.43265	0.515
0.41244	0.44308
0.42052	7.30812
0.41594	5.4772
0.41934	1.50706
0.62775	0.10602
0.44861	2.0711
0.66876	0.12997
0.4379	1.08917
0.47134	1.51604
0.6113	0.10402
0.41093	6.0746
0.39841	7.71149
0.68558	0.18877
0.42046	3.65043
0.6262	0.14609
0.40893	1.99765
0.60496	0.2503
0.42549	0.92214
0.41303	12.1092
0.65011	0.13597
0.41994	1.74321
0.41611	3.53216
0.41313	7.22226
0.69183	0.16351
0.43632	0.1019
0.40489	4.9021
0.46159	5.59667
0.73676	0.12775
0.4386	0.1337
0.41386	2.70191
0.46969	8.47414
0.45876	1.89034
0.42132	7.43596
0.42372	1.91149
0.42401	2.16072
0.4268	20.5966
0.41776	1.52331
0.43841	0.50223
0.43123	15.484
0.41498	0.87764
0.40311	7.73088
0.43099	0.71614
0.46958	2.15557
0.42322	7.23665
0.46156	8.05063
0.31239	0.17471
0.5612	0.10135
0.42346	3.92086
0.45936	0.30129
0.43077	0.83887
0.42968	7.01101
0.46344	4.63529
0.44911	0.47582
0.42249	7.81373
0.40831	0.64034
0.43399	0.5179
0.40731	1.59543
0.42856	0.50511
0.42697	0.23947
0.41551	1.31918
0.42605	7.78883
0.40655	7.93893
0.45654	0.14182
0.45154	0.20623
0.43066	1.65583
0.42446	1.86598
0.41308	7.01556
0.41593	5.53569
0.42789	1.61088
0.42061	13.0924
0.43137	2.85516
0.76108	0.16253
0.42038	5.10576
0.42025	13.6666
0.42411	1.30547
0.3607	0.2116
0.41138	2.77041
0.47831	0.53304
0.4272	1.27602
0.42901	4.1249
0.41439	3.4255
0.4681	8.16029
0.64978	0.11798
0.4205	2.42437
0.41209	0.51035
0.42052	6.00508
0.43888	0.99293
0.43729	0.65849
0.42344	0.33915
0.42085	3.07552
0.44976	0.25831
0.42493	3.68432
0.65435	0.10619
0.41276	4.1862
0.42004	7.49178
0.43635	0.49875
0.42942	0.41248
0.45531	0.11697
0.43019	0.90254
0.46155	7.01911
0.63997	0.10424
0.41996	2.32327
0.46695	4.31867
0.42186	2.17986
0.41778	1.10051
0.42878	0.99903
0.47108	14.4447
0.4214	2.37777
0.43479	0.98586
0.4255	0.57473
0.43673	0.43207
0.4192	24.3993
0.42084	2.41434
0.41586	7.70882
0.78037	0.12539
0.42161	2.91478
0.42411	7.06818
0.4653	11.7842
0.41184	3.77481
0.43939	0.65106
0.42527	0.9752
0.41301	3.44443
0.417	4.92968
0.41711	1.2158
0.41034	1.04139
0.42043	2.48412
0.65487	0.1279
0.46747	0.68643
0.42424	0.89442
0.66299	0.90913
0.42574	5.97714
0.4729	3.35878
0.42075	6.94009
0.42387	5.18318
0.42994	0.89515
0.47241	4.9645
0.70951	0.14929
0.43105	0.98984
0.42631	2.44922
0.43001	1.1477
0.4256	7.72333
0.42868	2.06318
0.42735	11.4069
0.42149	0.9044
0.42268	2.24315
0.43922	0.53597
0.59176	0.12749
0.43158	0.74658
0.42508	1.13337
0.42243	1.59667
0.47214	13.2767
0.42403	0.26726
0.45995	2.85749
0.70343	0.13022
0.40427	1.27422
0.71819	0.12737
0.48874	0.23503
0.41426	2.63877
0.42916	4.81547
0.41082	1.55966
0.4222	9.41901
0.61023	0.15976
0.40919	0.31841
0.42038	2.57338
0.60184	0.21497
0.42498	3.74648
0.41477	4.22283
0.3779	6.6151
0.4215	3.17739
0.40774	1.71065
0.41897	0.84103
0.70949	0.15178
0.61576	0.18673
0.47015	5.50226
0.42075	8.50222
0.4154	15.7088
0.42103	1.29401
0.41545	6.85859
0.41677	4.88028
0.42054	3.57388
0.41759	11.6814
0.42082	3.53358
0.4212	1.57514
0.4628	3.38359
0.40795	5.58237
0.41698	5.90837
0.40954	3.86733
0.42502	7.33185
0.42508	7.48322
0.40828	0.70677
0.41439	8.31752
0.39048	0.36086
0.42853	2.0337
0.53212	0.20726
0.4205	5.68846
0.41956	1.00714
0.41293	12.3457
0.41209	15.106
0.42202	2.1639
0.55271	0.11425
0.67727	0.12838
0.72416	0.10055
0.43367	0.72387
0.42624	0.49093
0.42425	2.67929
0.66732	0.21573
0.42086	5.79123
0.65785	0.10741
0.42416	8.71497
0.67129	0.14019
0.42974	1.89588
0.60373	0.14242
0.69147	0.10001
0.42658	3.4187
0.41251	6.41658
0.42445	2.54647
0.41763	7.60921
0.42041	2.66307
0.42138	3.37634
0.5451	0.10574
0.41314	8.00818
0.6471	0.15523
0.42073	1.11952
0.43045	0.902
0.42251	4.43263
0.42761	1.77428
0.42272	4.15518
0.41506	3.00732
0.43403	4.34194
0.45758	3.74931
0.42132	1.14621
0.40671	5.99151
0.42478	5.82724
0.40328	4.69402
0.41503	7.23536
0.61648	0.14126
0.42636	4.27578
0.42014	8.75414
0.42196	5.73295
0.42242	4.7946
0.57522	0.18053
0.4699	18.7068
0.41613	7.84705
0.42664	1.39878
0.41751	6.12004
0.42094	4.51633
0.40992	1.43561
0.42041	0.93617
0.42471	4.98458
0.42266	5.61513
0.48067	0.16013
0.43018	3.20735
0.67258	0.11796
0.40631	0.5027
0.75611	0.11419
0.42267	1.92027
0.5893	0.28069
0.42832	0.35555
0.41259	0.3097
0.40821	0.50359
0.41329	0.92998
0.43583	0.67668
0.42604	9.65095
0.42163	30.1874
0.47866	0.16353
0.65329	0.23184
0.76171	0.11336
0.4126	8.04305
0.46074	10.0897
0.42411	1.79697
0.45755	2.01708
0.4116	7.33123
0.41983	4.33102
0.42413	14.0588
0.43056	4.37029
0.41679	2.21168
0.43084	4.92318
0.41782	5.4797
0.42745	1.0422
0.6488	0.19764
0.60995	0.27302
0.48315	0.12025
0.44432	0.46218
0.40726	1.84622
0.42057	0.51557
0.43353	6.67655
0.42415	2.9186
0.41707	4.09769
0.51246	0.11713
0.42829	2.24503
0.43606	1.49537
0.42733	4.30368
0.46332	3.27195
0.42784	2.72906
0.70761	0.1072
0.43281	0.46399
0.41653	7.13034
0.41025	5.67967
0.41159	0.85176
0.42384	5.85336
0.41042	2.47078
0.65511	0.11938
0.40905	5.12209
0.43753	2.30663
0.42929	3.47169
0.42622	2.87809
0.59604	0.11082
0.41076	3.09152
0.47313	1.92715
0.63459	0.13364
0.41365	8.60975
0.46553	0.41149
0.40914	3.77091
0.41741	10.695
0.76318	0.18167
0.37674	10.8943
0.41833	19.7131
0.43368	2.29896
0.41798	3.87161
0.4112	5.20247
0.45457	20.1987
0.45996	7.38335
0.62744	0.19385
0.42522	4.06021
0.42091	2.79122
0.69425	0.13815
0.41636	8.42454
0.41865	6.64864
0.4322	2.16531
0.41319	4.13024
0.42619	6.84774
0.41788	5.23091
0.4238	1.01112
0.4197	2.89917
0.41136	0.47411
0.38735	9.0637
0.61245	0.10113
0.6374	0.18284
0.42212	6.07365
0.42049	1.18303
0.42402	9.80363
0.41932	2.09369
0.69641	0.13249
0.41796	3.64876
0.42036	3.41135
0.41303	4.69563
0.42037	2.62861
0.41251	0.91338
0.42627	3.6055
0.45763	4.54646
0.42344	3.00876
0.74042	0.10002
0.66838	0.19072
0.67857	0.12181
0.59255	0.19541
0.42807	5.83421
0.42691	1.56695
0.67439	0.11217
0.41515	9.49129
0.527	0.10722
0.62642	0.16506
0.46858	2.58631
0.54789	0.10666
0.42012	2.69535
0.42562	14.2715
0.5827	0.15191
0.41276	2.43837
0.42118	1.91979
0.42322	1.61341
0.32908	10.0883
0.41397	2.40814
0.41562	4.342
0.41857	10.6718
0.46488	6.89815
0.40738	1.95137
0.42743	7.66625
0.42978	0.32387
0.44469	0.22703
0.41992	4.32149
0.42312	13.5139
0.40808	3.32771
0.42524	4.51976
0.45506	2.80746
0.41996	4.77003
0.42747	2.07553
0.41905	5.927
0.43458	1.90634
0.67675	0.13026
0.40792	1.14426
0.42277	2.15005
0.42972	0.84303
0.44076	0.44805
0.4323	0.7752
0.72182	0.12977
0.43015	3.98382
0.41871	4.09305
0.43428	1.14978
0.42639	8.3775
0.4336	0.99007
0.41684	4.0077
0.42689	1.95538
0.4665	2.54777
0.4191	5.16294
0.42003	1.61054
0.41767	4.14916
0.41906	1.06705
0.41864	18.5723
0.43107	1.94934
0.57127	0.11859
0.42712	0.80679
0.41311	4.95035
0.42158	0.50074
0.42171	3.46141
0.43325	1.65081
0.42906	0.77878
0.41547	20.3972
0.42346	1.07231
0.66728	0.23066
0.46768	19.7593
0.42812	3.73261
0.41368	4.22152
0.42609	4.37327
0.46452	10.494
0.66211	0.15781
0.46891	9.8481
0.61048	0.15089
0.65605	0.11559
0.43621	0.33372
0.42561	9.29127
0.46235	8.83273
0.4282	3.47858
0.47114	5.04039
0.46946	22.0034
0.43997	0.24238
0.43377	0.85812
0.53284	0.16235
0.41129	1.53583
0.42259	15.0216
0.64588	0.21012
0.42274	3.83808
0.41898	7.39247
0.46881	7.6798
0.6792	0.11251
0.55456	0.10903
0.40631	1.41534
0.14196	3.79415
0.42514	0.94738
0.41022	2.52403
0.41812	0.67248
0.42917	1.43581
0.64312	0.19443
0.41483	12.1428
0.41568	2.3094
0.41635	17.4995
0.40778	3.15737
0.88712	0.16276
0.98265	0.21112
0.94207	0.10148
0.94184	0.14577
0.95683	0.16404
0.93453	0.19021
0.89846	0.15608
0.96682	0.14174
0.95576	0.28484
0.92629	0.20577
0.9268	0.2728
0.96012	0.12694
0.92474	0.12304
0.91416	0.21791
0.9305	0.22363
0.94052	0.34913
0.74162	0.15662
0.90069	0.1685
0.88596	0.16495
0.88094	0.16426
0.70811	0.1613
0.95768	0.12433
0.90012	0.10109
0.33151	0.16957
0.81846	0.16086
0.9734	0.39037
0.91187	0.2874
0.91378	0.12069
0.94088	0.15117
0.90892	0.49216
0.46716	0.15731
0.88766	0.18027
0.92646	0.17218
0.94621	0.21012
0.97865	0.21171
0.93745	0.12845
0.94096	0.10536
0.17442	0.20373
0.94624	0.10727
0.4596	0.10204
0.87692	0.17768
0.93139	0.21175
0.93398	0.10672
0.94527	0.1273
0.58698	0.20783
0.93372	0.20444
0.77269	0.18195
0.99043	0.2812
0.94781	0.12082
0.86514	0.18126
0.94864	0.19306
0.90521	0.1427
0.92613	0.21089
0.21507	0.14292
0.92342	0.14957
0.91857	0.12387
0.98681	0.3177
0.92264	0.13389
0.95726	0.24977
0.92771	0.13465
0.88971	0.1105
0.98899	0.28612
0.82495	0.22391
0.89702	0.18951
0.80923	0.16644
0.96386	0.22515
0.95649	0.11914
0.97829	0.23433
0.98284	0.2431
0.94778	0.14371
0.95778	0.1483
0.85226	0.11739
0.95628	0.16209
0.95769	0.14182
0.94222	0.15349
0.95828	0.11146
0.79438	0.12926
0.42213	2.7461
0.42676	13.6099
0.4229	3.71525
0.41471	5.78346
0.22382	0.16778
0.3005	0.13788
0.4115	2.24893
0.55352	0.10594
0.42781	4.01451
0.41891	4.47401
0.4192	3.33915
0.41241	1.79639
0.42226	27.8549
0.41762	5.09814
0.42164	8.33772
0.42091	8.08715
0.3357	0.38552
0.43187	1.60073
0.51461	0.21025
0.42663	0.84636
0.46593	0.65536
0.41398	1.06366
0.42713	1.347
0.70438	0.11429
0.46151	8.21923
0.43154	11.1767
0.43106	0.38602
0.42284	1.41047
0.41909	22.2757
0.74288	0.10887
0.45742	15.2516
0.4157	4.81441
0.46711	7.7438
0.42189	8.82828
0.41946	1.08691
0.43432	0.57369
0.41249	0.54795
0.41971	0.76687
0.42972	3.24459
0.42157	9.47067
0.423	4.21487
0.42239	2.4305
0.41794	1.17904
0.4682	4.24688
0.41888	0.94764
0.4313	1.91163
0.41124	1.61536
0.41554	18.7067
0.47172	14.1596
0.42782	0.29877
0.40502	3.90651
0.41111	1.28559
0.41461	1.68541
0.42345	7.26627
0.45965	0.20689
0.42953	5.27664
0.42337	9.63054
0.42064	2.5033
0.41777	2.99721
0.42595	1.24599
0.45981	16.5711
0.41144	5.55189
0.41471	3.20433
0.42076	3.05592
0.42068	9.47552
0.43952	1.10842
0.42383	2.21579
0.42072	5.08317
0.42266	7.17286
0.47263	0.11384
0.41	4.28367
0.41952	3.65928
0.41784	2.49575
0.41724	8.0823
0.43096	5.85521
0.42513	0.91967
0.42218	7.73366
0.42445	1.41136
0.40528	1.27466
0.45956	13.0833
0.41756	2.2216
0.42749	2.48823
0.52527	0.11513
0.42143	1.72441
0.69009	0.11975
0.41492	0.92659
0.42146	2.37038
0.71481	0.13152
0.42778	0.87985
0.41866	2.09861
0.52956	0.38362
0.40639	0.66267
0.41161	0.67402
0.42707	3.42503
0.42132	10.9874
0.42296	9.9786
0.41756	7.31129
0.41865	7.4262
0.41381	0.71895
0.41682	1.5118
0.41368	1.74317
0.41518	2.50323
0.52644	0.11444
0.42562	5.42828
0.74447	0.12476
0.42242	8.07987
0.44935	0.41026
0.41761	5.87487
0.42738	0.77224
0.42475	6.86257
0.62435	1.41007
0.64861	0.1217
0.4181	2.01467
0.41355	7.93179
0.42797	9.65106
0.50146	0.31469
0.42705	2.22856
0.41834	1.24443
0.42023	18.5696
0.42062	6.43333
0.42381	0.75453
0.41944	6.82593
0.68124	0.37157
0.43583	1.41929
0.45781	17.7424
0.41771	2.15393
0.41753	9.56419
0.42968	1.52335
0.41556	2.48124
0.44333	0.35972
0.41829	1.87351
0.41791	0.51739
0.42223	17.2553
0.41299	4.29537
0.41885	5.40318
0.43132	0.5354
0.42783	2.42289
0.42172	2.72737
0.42909	0.85127
0.43087	2.40272
0.4353	5.5955
0.42961	1.38202
0.47225	0.81286
0.42165	0.46292
0.45999	9.56558
0.41943	15.4276
0.42057	14.5112
0.41138	2.61933
0.61459	0.22116
0.42397	9.49162
0.42733	3.41191
0.41886	2.0785
0.4685	9.00938
0.44139	0.46427
0.41713	3.9431
0.4175	2.52085
0.41501	2.80041
0.41955	15.481
0.43257	0.52971
0.43157	7.02176
0.41547	1.69436
0.41203	16.17
0.57124	0.12247
0.69647	0.16462
0.42287	3.66616
0.70243	0.14881
0.42658	6.5782
0.41429	8.98697
0.4199	3.61441
0.53049	2.27092
0.41691	1.2796
0.4292	2.30227
0.41754	6.31475
0.41223	1.61065
0.42526	1.08405
0.4703	1.31856
0.41885	3.17893
0.42077	2.162
0.41485	3.92931
0.42769	0.91865
0.42015	3.46698
0.46488	7.73
0.50664	0.23395
0.44502	0.72192
0.76759	0.12879
0.47283	15.1301
0.41219	4.72295
0.41586	19.9647
0.42303	3.62236
0.70266	0.13207
0.41026	5.6824
0.41816	13.6001
0.41985	11.4989
0.41096	6.32211
0.41523	5.86368
0.41547	3.00303
0.42407	2.72059
0.41694	5.01051
0.41664	0.7157
0.41689	25.164
0.40884	10.4276
0.42002	7.61132
0.43013	2.10721
0.4136	5.02072
0.42198	2.48532
0.43016	0.82801
0.42218	2.0747
0.42596	2.92888
0.48008	8.42933
0.62373	0.17954
0.62135	0.14863
0.45789	0.2892
0.60543	0.11037
0.41872	3.75573
0.43681	0.2175
0.41803	4.12557
0.41331	4.58922
0.41588	10.899
0.44431	3.47864
0.43794	0.67199
0.42881	1.66373
0.46261	0.26629
0.40874	2.23012
0.41498	6.95699
0.42853	0.18327
0.42313	0.65431
0.42932	6.78358
0.40543	2.71495
0.67916	0.17529
0.56091	0.17541
0.41639	4.64817
0.41776	6.75437
0.42571	2.11464
0.41251	9.05586
0.32074	11.8131
0.54661	0.6478
0.41745	6.00426
0.42753	0.51388
0.42921	7.18608
0.42262	4.64119
0.42286	8.2302
0.42473	6.99779
0.435	0.19495
0.77146	0.12095
0.41901	0.57034
0.42544	2.61671
0.68767	0.12359
0.37321	0.13771
0.41733	8.78697
0.45247	16.8692
0.41313	10.4838
0.42895	11.5547
0.43091	2.06343
0.57066	0.1079
0.50769	0.17823
0.42666	3.85171
0.5717	0.15487
0.41862	1.88812
0.41604	1.7796
0.4691	4.85577
0.42463	1.86024
0.42676	2.43009
0.42133	5.60653
0.42547	3.11158
0.41552	1.41458
0.4261	1.91427
0.42642	7.5516
0.42286	5.81387
0.47116	3.69423
0.41754	2.18522
0.42145	2.41566
0.42822	5.28591
0.42794	4.93132
0.42157	4.18209
0.42397	17.5705
0.42206	4.72586
0.42241	6.36302
0.40814	10.1076
0.42249	5.25434
0.43639	3.83053
0.63708	0.16966
0.63321	0.46816
0.71227	0.11271
0.41997	3.68119
0.63988	0.34714
0.57203	0.15344
0.42146	3.99573
0.42942	1.36327
0.42064	1.11582
0.37106	0.11816
0.41923	0.48315
0.41631	2.06316
0.41637	8.03608
0.42288	10.1823
0.44122	0.10968
0.42042	3.96025
0.42009	2.56286
0.41866	5.78383
0.48128	0.15528
0.4212	4.51506
0.43119	1.9656
0.74885	0.20875
0.51042	0.2348
0.428	10.7745
0.52969	0.13874
0.42156	0.71922
0.47128	0.44108
0.41071	5.04161
0.46214	7.7678
0.43235	7.05356
0.41549	2.14074
0.41469	2.9397
0.4188	11.896
0.42353	1.61447
0.42409	4.46368
0.46564	1.28172
0.64294	0.41977
0.41644	1.36238
0.42229	3.30098
0.40838	6.23949
0.76711	0.10921
0.65085	0.19807
0.42095	5.38293
0.4064	2.99958
0.41377	3.12496
0.4582	20.7504
0.42181	3.50261
0.46108	7.26069
0.42881	0.32764
0.4175	7.751
0.42803	2.86855
0.41828	4.37519
0.43301	1.06995
0.43197	0.94808
0.51072	0.20196
0.42154	2.09163
0.41216	1.59188
0.42497	0.79614
0.46859	4.83112
0.4259	4.35071
0.57589	0.24474
0.42008	5.30996
0.42423	4.58429
0.41663	6.59818
0.71044	0.12022
0.413	8.91175
0.42969	0.18341
0.46351	11.0956
0.40115	3.23218
0.42018	3.436
0.43217	2.73063
0.42313	1.93857
0.46593	10.4733
0.41663	1.46373
0.42353	8.61014
0.42193	3.77165
0.44143	0.2464
0.41433	9.58289
[truncated: 3,958 more rows]

## Sheet: Fig. 6f
H31-10R2(Cit)K9(Me3) Scatter			H31-10R8(Cit)K9(Me3) Scatter			Gaussian-fitting for H31-10R2(Cit)K9(Me3)			Gaussian-fitting for H31-10R8(Cit)K9(Me3)
BlockDepth	Restime (ms)		BlockDepth	Restime (ms)		BlockDepth	Relative counts		BlockDepth	Relative counts
0.39742	0.92133		0.46777	15.0721		0.3015	9.15262E-4		0.005	0.00151
0.44232	5.85951		0.45353	9.3007		0.30209	9.15262E-4		0.00698	0.00151
0.43984	3.94513		0.46474	1.94687		0.30239	9.15262E-4		0.00797	0.00151
0.45145	3.2046		0.43045	9.50342		0.30269	9.15262E-4		0.00896	0.00151
0.45421	0.41736		0.46841	0.56288		0.30299	9.15262E-4		0.00995	0.00151
0.435	5.05317		0.48187	0.43804		0.30328	9.15262E-4		0.01095	0.00151
0.4501	0.56425		0.47006	0.61715		0.30358	9.15262E-4		0.01194	0.00151
0.44223	4.60819		0.46473	7.1067		0.30388	9.15262E-4		0.01293	0.00151
0.44122	1.22209		0.49985	0.22787		0.30418	9.15262E-4		0.01392	0.00151
0.44412	3.4912		0.46625	4.01114		0.30447	9.15262E-4		0.01491	0.00151
0.43889	2.48335		0.44597	3.21551		0.3045	9.15262E-4		0.015	0.00151
0.34735	7.12483		0.4625	0.78695		0.30477	9.15262E-4		0.0159	0.00151
0.43649	1.48819		0.47348	8.68867		0.30507	9.15262E-4		0.01689	0.00151
0.4418	8.21444		0.47791	1.72812		0.30536	9.15262E-4		0.01788	0.00151
0.43475	2.56179		0.46904	4.05894		0.30566	9.15262E-4		0.01887	0.00151
0.44081	0.94477		0.48271	20.5651		0.30596	9.15262E-4		0.01986	0.00151
0.43916	2.12355		0.46463	1.59773		0.30626	9.15262E-4		0.02086	0.00151
0.44175	10.4		0.46785	2.78806		0.30655	9.15262E-4		0.02185	0.00151
0.44542	0.52407		0.49585	0.43486		0.30685	9.15262E-4		0.02284	0.00151
0.43783	9.42007		0.22245	0.20673		0.30715	9.15262E-4		0.02383	0.00151
0.4253	4.95951		0.46487	2.0343		0.30745	9.15262E-4		0.02482	0.00151
0.44645	1.00552		0.46709	3.41125		0.3075	9.15262E-4		0.025	0.00151
0.44821	2.19227		0.45843	15.8309		0.30774	9.15262E-4		0.02581	0.00151
0.45974	0.85555		0.45955	4.50228		0.30804	9.15262E-4		0.0268	0.00151
0.44591	3.79166		0.46763	2.69196		0.30834	9.15262E-4		0.02779	0.00151
0.43598	3.53603		0.45123	8.28127		0.30864	9.15262E-4		0.02878	0.00151
0.45073	2.89087		0.47293	0.38327		0.30893	9.15262E-4		0.02977	0.00151
0.44689	1.33919		0.4664	3.51207		0.30923	9.15262E-4		0.03077	0.00151
0.46369	0.38464		0.45387	17.8492		0.30953	9.15262E-4		0.03176	0.00151
0.43342	0.8881		0.46856	11.0792		0.30982	9.15262E-4		0.03275	0.00151
0.42779	1.02041		0.45759	0.64716		0.31012	9.15262E-4		0.03374	0.00151
0.4639	0.60909		0.46399	29.2071		0.31042	9.15262E-4		0.03473	0.00151
0.45281	2.44895		0.46706	3.93421		0.3105	9.15262E-4		0.035	0.00151
0.43659	4.60539		0.44108	3.77644		0.31072	9.15262E-4		0.03572	0.00151
0.41627	5.09537		0.46286	3.51845		0.31101	9.15262E-4		0.03671	0.00151
0.46429	0.53967		0.46942	6.30082		0.31131	9.15262E-4		0.0377	0.00151
0.43206	3.63947		0.46552	15.0799		0.31161	9.15262E-4		0.03869	0.00151
0.44914	0.48188		0.47775	2.40086		0.31191	9.15262E-4		0.03968	0.00151
0.43474	7.63571		0.47432	3.63343		0.3122	9.15262E-4		0.04068	0.00151
0.45272	0.53206		0.45964	10.9723		0.3125	9.15262E-4		0.04167	0.00151
0.43687	3.4417		0.46263	4.84794		0.3128	9.15262E-4		0.04266	0.00151
0.42799	1.84696		0.46302	6.46995		0.31309	9.15262E-4		0.04365	0.00151
0.43958	1.86264		0.46473	18.1156		0.31339	9.15262E-4		0.04464	0.00151
0.44061	0.657		0.46172	4.37531		0.3135	9.15262E-4		0.045	0.00151
0.43455	2.93826		0.4943	0.37543		0.31369	9.15262E-4		0.04563	0.00151
0.45516	0.88747		0.44889	2.39531		0.31399	9.15262E-4		0.04662	0.00151
0.46094	0.4892		0.45163	6.05948		0.31428	9.15262E-4		0.04761	0.00151
0.45297	1.20146		0.46305	26.3083		0.31458	9.15262E-4		0.0486	0.00151
0.43048	1.37941		0.46958	19.6836		0.31488	9.15262E-4		0.04959	0.00151
0.38359	1.34275		0.45059	0.97111		0.31518	9.15262E-4		0.05059	0.00151
0.44884	5.56883		0.46826	8.46327		0.31547	9.15262E-4		0.05158	0.00151
0.43919	1.7692		0.46028	2.89333		0.31577	9.15262E-4		0.05257	0.00151
0.45681	0.30815		0.46143	14.7145		0.31607	9.15262E-4		0.05356	0.00151
0.43579	0.70623		0.46239	10.3506		0.31636	9.15262E-4		0.05455	0.00151
0.50997	0.21128		0.47436	2.37637		0.3165	9.15262E-4		0.055	0.00151
0.43845	2.23163		0.47017	2.99087		0.31666	9.15262E-4		0.05554	0.00151
0.44556	0.95098		0.45451	19.6191		0.31696	9.15262E-4		0.05653	0.00151
0.44103	5.82756		0.46682	11.0387		0.31726	9.15262E-4		0.05752	0.00151
0.47086	0.31474		0.46684	16.2099		0.31755	9.15262E-4		0.05851	0.00151
0.44792	3.05906		0.45848	4.82075		0.31785	9.15262E-4		0.0595	0.00151
0.44952	0.7987		0.43308	5.5396		0.31815	9.15262E-4		0.0605	0.00151
0.43826	3.84931		0.44971	4.30338		0.31845	9.15262E-4		0.06149	0.00151
0.43916	2.51539		0.47375	3.49155		0.31874	9.15262E-4		0.06248	0.00151
0.45837	0.68238		0.47092	10.2251		0.31904	9.15262E-4		0.06347	0.00151
0.43261	0.38911		0.47169	8.75863		0.31934	9.15262E-4		0.06446	0.00151
0.5076	1.4208		0.44889	13.3695		0.3195	9.15262E-4		0.065	0.00151
0.40841	0.32925		0.45941	2.87167		0.31964	9.15262E-4		0.06545	0.00151
0.4508	3.8601		0.45977	7.71078		0.31993	9.15262E-4		0.06644	0.00151
0.45096	3.48919		0.46483	5.5779		0.32023	9.15262E-4		0.06743	0.00151
0.45719	1.24075		0.47157	1.00798		0.32053	9.15262E-4		0.06842	0.00151
0.41227	0.33265		0.4782	6.98736		0.32082	9.15262E-4		0.06941	0.00151
0.44049	4.37678		0.45851	11.3393		0.32112	9.15262E-4		0.07041	0.00151
0.43492	2.19702		0.41912	33.2047		0.32142	9.15262E-4		0.0714	0.00151
0.43809	0.99356		0.47496	19.6193		0.32172	9.15262E-4		0.07239	0.00151
0.42652	3.33245		0.46205	1.39892		0.32201	9.15262E-4		0.07338	0.00151
0.44683	0.53877		0.46588	3.16653		0.32231	9.15262E-4		0.07437	0.00151
0.43796	6.21502		0.46252	4.28076		0.3225	9.15262E-4		0.075	0.00151
0.36903	2.22379		0.47262	7.78284		0.32261	9.15262E-4		0.07536	0.00151
0.43615	9.32709		0.47426	0.48999		0.32291	9.15262E-4		0.07635	0.00151
0.44487	2.89106		0.47767	1.56705		0.3232	9.15262E-4		0.07734	0.00151
0.43538	4.25505		0.47981	2.64923		0.3235	9.15262E-4		0.07833	0.00151
0.43782	3.45194		0.47317	5.88695		0.3238	9.15262E-4		0.07932	0.00151
0.43411	9.16082		0.47044	4.68234		0.32409	9.15262E-4		0.08032	0.00151
0.46437	0.38629		0.46673	14.5438		0.32439	9.15262E-4		0.08131	0.00151
0.4242	2.01177		0.47714	2.62079		0.32469	9.15262E-4		0.0823	0.00151
0.45348	0.92097		0.46533	8.64972		0.32499	9.15262E-4		0.08329	0.00151
0.40741	6.73913		0.47887	4.82611		0.32528	9.15262E-4		0.08428	0.00151
0.43021	5.8121		0.42569	0.96138		0.3255	9.15262E-4		0.085	0.00151
0.43553	5.46753		0.46043	1.60578		0.32558	9.15262E-4		0.08527	0.00151
0.43358	0.50051		0.46768	4.32384		0.32588	9.15262E-4		0.08626	0.00151
0.43214	0.38404		0.46057	0.83501		0.32618	9.15262E-4		0.08725	0.00151
0.451	0.79637		0.25412	0.64698		0.32647	9.15262E-4		0.08824	0.00151
0.4442	5.12795		0.47574	0.52221		0.32677	9.15262E-4		0.08923	0.00151
0.43901	4.11205		0.4741	6.29547		0.32707	9.15262E-4		0.09023	0.00151
0.43844	1.60324		0.4606	2.72762		0.32736	9.15262E-4		0.09122	0.00151
0.43704	4.11217		0.46975	13.532		0.32766	9.15262E-4		0.09221	0.00151
0.4229	7.35224		0.47503	0.31056		0.32796	9.15262E-4		0.0932	0.00151
0.4473	4.38062		0.46491	11.464		0.32826	9.15262E-4		0.09419	0.00151
0.44345	7.1358		0.48022	0.41244		0.3285	9.15262E-4		0.095	0.00151
0.46618	0.31517		0.27172	0.78356		0.32855	9.15262E-4		0.09518	0.00151
0.44837	6.50894		0.46458	11.8139		0.32885	9.15262E-4		0.09617	0.00151
0.45512	0.39156		0.47751	0.80399		0.32915	9.15262E-4		0.09716	0.00151
0.44485	1.58252		0.46438	20.6551		0.32945	9.15262E-4		0.09815	0.00151
0.4609	0.61524		0.469	4.34372		0.32974	9.15262E-4		0.09914	0.00151
0.46848	0.47074		0.46934	1.75244		0.33004	9.15262E-4		0.10014	0.00151
0.44754	2.63448		0.46596	8.28721		0.33034	9.15262E-4		0.10113	0.00151
0.44884	1.1948		0.46083	6.16669		0.33064	9.15262E-4		0.10212	0.00151
0.47395	0.27067		0.45963	1.13503		0.33093	9.15262E-4		0.10311	0.00151
0.44994	1.25213		0.46524	5.40745		0.33123	9.15262E-4		0.1041	0.00151
0.44758	1.25201		0.46317	4.0743		0.3315	9.15262E-4		0.105	0.00151
0.44395	1.63521		0.45949	3.33709		0.33153	9.15262E-4		0.10509	0.00151
0.433	4.8323		0.46685	7.06969		0.33182	9.15262E-4		0.10608	0.00151
0.4393	3.6655		0.46534	2.5859		0.33212	9.15262E-4		0.10707	0.00151
0.43546	0.81192		0.4769	12.3171		0.33242	9.15262E-4		0.10806	0.00151
0.41594	0.44438		0.46313	3.49056		0.33272	9.15262E-4		0.10905	0.00151
0.43456	7.2264		0.473	23.0109		0.33301	9.15262E-4		0.11005	0.00151
0.45792	1.95806		0.45244	2.32783		0.33331	9.15262E-4		0.11104	0.00151
0.44632	1.09548		0.45728	7.39879		0.33361	9.15262E-4		0.11203	0.00151
0.43739	2.60381		0.46089	7.56283		0.33391	9.15262E-4		0.11302	0.00151
0.45383	0.35262		0.49029	0.35832		0.3342	9.15262E-4		0.11401	0.00151
0.44212	4.09705		0.47027	2.85802		0.3345	9.15262E-4		0.115	0.00151
0.44038	6.25137		0.68553	1.34521		0.3348	9.15262E-4		0.115	0.00151
0.45059	3.01849		0.46302	18.1595		0.33509	9.15262E-4		0.11599	0.00151
0.4446	0.69647		0.47273	2.33438		0.33539	9.15262E-4		0.11698	0.00151
0.45396	0.30609		0.18166	1.58616		0.33569	9.15262E-4		0.11797	0.00151
0.46225	2.94479		0.46878	5.12629		0.33599	9.15262E-4		0.11896	0.00151
0.42987	2.74794		0.46457	4.51586		0.33628	9.15262E-4		0.11995	0.00151
0.42693	0.39078		0.451	2.49852		0.33658	9.15262E-4		0.12095	0.00151
0.43942	5.23972		0.47407	2.2788		0.33688	9.15262E-4		0.12194	0.00151
0.45099	0.56304		0.45659	11.4775		0.33718	9.15262E-4		0.12293	0.00151
0.44528	0.57645		0.47079	7.89509		0.33747	9.15262E-4		0.12392	0.00151
0.43731	1.34985		0.46991	13.7196		0.3375	9.15262E-4		0.12491	0.00151
0.45061	2.25289		0.46371	3.29094		0.33777	9.15262E-4		0.125	0.00151
0.42696	2.01943		0.46491	3.64899		0.33807	9.15262E-4		0.1259	0.00151
0.43639	0.51921		0.4632	5.76684		0.33836	9.15262E-4		0.12689	0.00151
0.43859	1.45166		0.46688	9.0634		0.33866	9.15262E-4		0.12788	0.00151
0.43875	3.90943		0.46127	15.3745		0.33896	9.15262E-4		0.12887	0.00151
0.47004	0.28811		0.40431	3.72283		0.33926	9.15262E-4		0.12986	0.00151
0.44346	1.36485		0.4609	5.98854		0.33955	9.15262E-4		0.13086	0.00151
0.46623	0.26884		0.4726	2.55469		0.33985	9.15262E-4		0.13185	0.00151
0.43914	2.22098		0.46431	25.3784		0.34015	9.15262E-4		0.13284	0.00151
0.45491	0.54248		0.47479	4.01123		0.34045	9.15262E-4		0.13383	0.00151
0.43623	1.72344		0.46567	1.97116		0.3405	9.15262E-4		0.13482	0.00151
0.43662	1.01467		0.46424	6.0904		0.34074	9.15262E-4		0.135	0.00151
0.46137	0.63272		0.4634	0.94879		0.34104	9.15262E-4		0.13581	0.00151
0.4449	1.40387		0.46473	6.43509		0.34134	9.15262E-4		0.1368	0.00151
0.4585	0.52345		0.47443	12.7759		0.34164	9.15262E-4		0.13779	0.00151
0.43707	3.12036		0.47191	3.20156		0.34193	9.15262E-4		0.13878	0.00151
0.78995	0.21514		0.47487	5.31261		0.34223	9.15262E-4		0.13977	0.00151
0.4435	7.07517		0.45955	8.75411		0.34253	9.15262E-4		0.14077	0.00151
0.42622	1.9049		0.47369	2.30268		0.34282	9.15262E-4		0.14176	0.00151
0.32395	0.482		0.47562	2.28361		0.34312	9.15262E-4		0.14275	0.00151
0.48522	0.21575		0.46277	3.7379		0.34342	9.15262E-4		0.14374	0.00151
0.43951	4.201		0.47291	5.362		0.3435	9.15262E-4		0.14473	0.00151
0.46124	0.27835		0.47365	3.74788		0.34372	9.15262E-4		0.145	0.00151
0.43896	1.78457		0.46954	5.53106		0.34401	9.15262E-4		0.14572	0.00151
0.44935	0.67803		0.70628	0.20814		0.34431	9.15262E-4		0.14671	0.00151
0.43171	1.8589		0.47025	4.63809		0.34461	9.15262E-4		0.1477	0.00151
0.46209	2.09627		0.46497	3.25041		0.34491	9.15262E-4		0.14869	0.00151
0.43558	4.73765		0.56466	15.3822		0.3452	9.15262E-4		0.14968	0.00151
0.4527	0.37564		0.46914	0.60468		0.3455	9.15262E-4		0.15068	0.00151
0.44402	1.74192		0.407	1.05415		0.3458	9.15262E-4		0.15167	0.00151
0.43674	16.5194		0.49153	19.7822		0.34609	9.15262E-4		0.15266	0.00151
0.41008	0.90526		0.46659	11.4766		0.34639	9.15262E-4		0.15365	0.00151
0.44216	2.36467		0.47741	2.89672		0.3465	9.15262E-4		0.15464	0.00151
0.43879	1.52522		0.48723	8.19336		0.34669	9.15262E-4		0.155	0.00151
0.45745	0.59033		0.13473	0.21861		0.34699	9.15262E-4		0.15563	0.00151
0.43549	1.26968		0.13632	0.25191		0.34728	9.15262E-4		0.15662	0.00151
0.43734	0.93324		0.46327	4.40019		0.34758	9.15262E-4		0.15761	0.00151
0.45706	1.51007		0.47549	0.53066		0.34788	9.15262E-4		0.1586	0.00151
0.43326	3.50331		0.46246	19.688		0.34818	9.15262E-4		0.15959	0.00151
0.44007	0.87599		0.48468	1.48368		0.34847	9.15262E-4		0.16059	0.00151
0.45645	0.65179		0.47373	3.6333		0.34877	9.15262E-4		0.16158	0.00151
0.4573	0.50373		0.58835	0.39928		0.34907	9.15262E-4		0.16257	0.00151
0.505	6.35065		0.47836	1.21931		0.34936	9.15262E-4		0.16356	0.00151
0.44902	1.02859		0.47146	2.35096		0.3495	9.15262E-4		0.16455	0.00151
0.44065	3.39031		0.46554	1.53876		0.34966	9.15262E-4		0.165	0.00151
0.45197	2.92061		0.74031	0.21698		0.34996	9.15262E-4		0.16554	0.00151
0.43804	1.50387		0.47075	15.9928		0.35026	9.15262E-4		0.16653	0.00151
0.44447	4.37949		0.46257	2.93463		0.35055	9.15262E-4		0.16752	0.00151
0.44368	4.56738		0.47425	9.57786		0.35085	9.15262E-4		0.16851	0.00151
0.43772	2.76734		0.48177	1.9768		0.35115	9.15262E-4		0.1695	0.00151
0.44437	0.90189		0.4767	14.937		0.35145	9.15262E-4		0.1705	0.00151
0.43398	9.02756		0.46183	4.05659		0.35174	9.15262E-4		0.17149	0.00151
0.43938	3.78474		0.46166	5.05479		0.35204	9.15262E-4		0.17248	0.00151
0.43844	1.42415		0.4529	0.66956		0.35234	9.15262E-4		0.17347	0.00151
0.45749	0.43732		0.47933	0.83122		0.3525	9.15262E-4		0.17446	0.00151
0.4528	0.77593		0.53207	0.40581		0.35264	9.15262E-4		0.175	0.00151
0.46479	0.33664		0.47397	2.97238		0.35293	9.15262E-4		0.17545	0.00151
0.44046	0.73713		0.46462	23.6361		0.35323	9.15262E-4		0.17644	0.00151
0.43929	2.58985		0.46435	3.21494		0.35353	9.15262E-4		0.17743	0.00151
0.43991	26.3503		0.47542	24.7281		0.35382	9.15262E-4		0.17842	0.00151
0.46208	0.62328		0.47756	20.6954		0.35412	9.15262E-4		0.17941	0.00151
0.45066	0.58908		0.46843	6.87926		0.35442	9.15262E-4		0.18041	0.00151
0.43889	0.6485		0.46562	4.39177		0.35472	9.15262E-4		0.1814	0.00151
0.45064	0.38841		0.45241	0.41356		0.35501	9.15262E-4		0.18239	0.00151
0.43292	10.5517		0.46639	10.2268		0.35531	9.15262E-4		0.18338	0.00151
0.44039	1.8467		0.46293	3.55		0.3555	9.15262E-4		0.18437	0.00151
0.41758	0.66046		0.48688	0.3075		0.35561	9.15262E-4		0.185	0.00151
0.42561	1.13566		0.46603	2.62284		0.35591	9.15262E-4		0.18536	0.00151
0.44309	4.83677		0.45861	3.04669		0.3562	9.15262E-4		0.18635	0.00151
0.3691	3.32784		0.47126	2.21156		0.3565	9.15262E-4		0.18734	0.00151
0.44363	6.60414		0.4711	3.16272		0.3568	9.15262E-4		0.18833	0.00151
0.43883	5.07221		0.46884	2.10288		0.35709	9.15262E-4		0.18932	0.00151
0.44218	5.10243		0.53609	0.3383		0.35739	9.15262E-4		0.19032	0.00151
0.43601	6.40208		0.46798	10.2464		0.35769	9.15262E-4		0.19131	0.00151
0.41637	1.17522		0.4556	11.449		0.35799	9.15262E-4		0.1923	0.00151
0.43885	1.95909		0.46966	6.22797		0.35828	9.15262E-4		0.19329	0.00151
0.44823	1.56276		0.47368	1.75084		0.3585	9.15262E-4		0.19428	0.00151
0.4434	1.67893		0.44972	0.44944		0.35858	9.15262E-4		0.195	0.00151
0.44865	1.73641		0.45814	9.8098		0.35888	9.15262E-4		0.19527	0.00151
0.4424	9.10657		0.46191	16.9549		0.35918	9.15262E-4		0.19626	0.00151
0.44912	2.0553		0.47411	16.9859		0.35947	9.15262E-4		0.19725	0.00151
0.4224	8.43809		0.78305	0.21483		0.35977	9.15262E-4		0.19824	0.00151
0.46506	0.36473		0.46686	1.19131		0.36007	9.15262E-4		0.19923	0.00151
0.44509	4.3475		0.45869	3.01846		0.36036	9.15262E-4		0.20023	0.00151
0.43333	4.96432		0.46777	7.13402		0.36066	9.15262E-4		0.20122	0.00151
0.45449	0.34571		0.46536	4.78608		0.36096	9.15262E-4		0.20221	0.00151
0.44182	0.96271		0.4558	12.8257		0.36126	9.15262E-4		0.2032	0.00151
0.44249	2.7993		0.46375	2.84244		0.3615	9.15262E-4		0.20419	0.00151
0.41625	1.55788		0.46776	10.941		0.36155	9.15262E-4		0.205	0.00151
0.44114	1.83255		0.45677	10.8962		0.36185	9.15262E-4		0.20518	0.00151
0.43636	7.96512		0.4619	3.10816		0.36215	9.15262E-4		0.20617	0.00151
0.44365	1.42868		0.45609	2.18038		0.36245	9.15262E-4		0.20716	0.00151
0.42764	1.00519		0.46113	19.9415		0.36274	9.15262E-4		0.20815	0.00151
0.43936	2.27187		0.4682	13.7815		0.36304	9.15262E-4		0.20914	0.00151
0.44602	0.76026		0.46989	1.3608		0.36334	9.15262E-4		0.21014	0.00151
0.43809	8.27569		0.46489	3.26231		0.36364	9.15262E-4		0.21113	0.00151
0.4294	2.72519		0.47469	10.9596		0.36393	9.15262E-4		0.21212	0.00151
0.44173	4.50842		0.46547	10.5437		0.36423	9.15262E-4		0.21311	0.00151
0.42697	5.59107		0.47017	0.57566		0.3645	9.15262E-4		0.2141	0.00151
0.44049	1.43533		0.46097	16.9467		0.36453	9.15262E-4		0.215	0.00151
0.39314	0.4591		0.38884	13.2729		0.36482	9.15262E-4		0.21509	0.00151
0.43044	4.20815		0.45959	16.0978		0.36512	9.15262E-4		0.21608	0.00151
0.09893	2.33534		0.47403	1.72357		0.36542	9.15262E-4		0.21707	0.00151
0.42589	1.3329		0.46286	13.2949		0.36572	9.15262E-4		0.21806	0.00151
0.4395	1.48768		0.4675	6.44393		0.36601	9.15262E-4		0.21905	0.00151
0.43712	5.07355		0.46392	6.27853		0.36631	9.15262E-4		0.22005	0.00151
0.44133	0.63172		0.46082	4.27244		0.36661	9.15262E-4		0.22104	0.00151
0.4517	1.88024		0.46714	7.33117		0.36691	9.15262E-4		0.22203	0.00151
0.44734	1.48506		0.46856	2.53072		0.3672	9.15262E-4		0.22302	0.00151
0.45029	3.98037		0.47571	2.99298		0.3675	9.15262E-4		0.22401	0.00151
0.43514	3.79283		0.46505	2.20684		0.3678	9.15262E-4		0.225	0.00151
0.43291	1.40275		0.46141	5.17184		0.36809	9.15262E-4		0.225	0.00151
0.44317	5.9144		0.46505	3.79128		0.36839	9.15262E-4		0.22599	0.00151
0.44824	0.7324		0.48539	9.68111		0.36869	9.15262E-4		0.22698	0.00151
0.46679	0.57579		0.46975	4.32185		0.36899	9.15262E-4		0.22797	0.00151
0.43632	2.15173		0.46899	19.132		0.36928	9.15262E-4		0.22896	0.00151
0.43709	2.16681		0.46235	9.18315		0.36958	9.15262E-4		0.22995	0.00151
0.43865	2.35102		0.46387	11.1269		0.36988	9.15262E-4		0.23095	0.00151
0.42958	2.45433		0.48317	4.90823		0.37018	9.15262E-4		0.23194	0.00151
0.43742	1.31489		0.46591	33.3047		0.37047	9.15262E-4		0.23293	0.00151
0.44758	1.02458		0.47351	3.29911		0.3705	9.15262E-4		0.23392	0.00151
0.44904	0.69185		0.45993	5.28624		0.37077	9.15262E-4		0.23491	0.00151
0.44263	1.34531		0.48003	3.4814		0.37107	9.15262E-4		0.235	0.00151
0.44393	1.22488		0.47844	0.41096		0.37136	9.15262E-4		0.2359	0.00151
0.44349	5.30267		0.46783	6.3192		0.37166	9.15262E-4		0.23689	0.00151
0.45541	0.4042		0.464	4.90244		0.37196	9.15262E-4		0.23788	0.00151
0.43768	1.52586		0.46909	6.60848		0.37226	9.15262E-4		0.23887	0.00151
0.44872	0.81201		0.46158	3.4621		0.37255	9.15262E-4		0.23986	0.00151
0.43998	5.54066		0.4672	2.31333		0.37285	9.15262E-4		0.24086	0.00151
0.43642	3.1837		0.45599	2.15582		0.37315	9.15262E-4		0.24185	0.00151
0.44773	0.44061		0.45176	1.63876		0.37345	9.15262E-4		0.24284	0.00151
0.44448	4.16811		0.46998	8.09339		0.3735	9.15262E-4		0.24383	0.00151
0.4507	1.63069		0.47154	3.41093		0.37374	9.15262E-4		0.24482	0.00151
0.45097	3.83297		0.47026	10.8683		0.37404	9.15262E-4		0.245	0.00151
0.44058	0.58515		0.46092	8.71834		0.37434	9.15262E-4		0.24581	0.00151
0.49159	0.22413		0.44936	5.9759		0.37464	9.15262E-4		0.2468	0.00151
0.39431	3.48079		0.47092	4.35595		0.37493	9.15262E-4		0.24779	0.00151
0.44652	0.43618		0.46277	1.81919		0.37523	9.15262E-4		0.24878	0.00151
0.43625	1.37126		0.45278	3.43326		0.37553	9.15262E-4		0.24977	0.00151
0.44172	5.9086		0.47248	28.9704		0.37582	9.15262E-4		0.25077	0.00151
0.44793	0.64441		0.4655	5.39677		0.37612	9.15262E-4		0.25176	0.00151
0.44132	0.97716		0.46528	14.2115		0.37642	9.15262E-4		0.25275	0.00151
0.43774	1.41637		0.48619	0.40485		0.3765	9.15262E-4		0.25374	0.00151
0.44182	5.31556		0.44764	8.41112		0.37672	9.15262E-4		0.25473	0.00151
0.44216	4.00681		0.46676	1.69389		0.37701	9.15262E-4		0.255	0.00151
0.39904	5.94153		0.46537	4.50011		0.37731	9.15262E-4		0.25572	0.00151
0.42827	1.0797		0.46126	6.94523		0.37761	9.15262E-4		0.25671	0.00151
0.44008	5.70024		0.49243	14.569		0.37791	9.15262E-4		0.2577	0.00151
0.44223	0.21528		0.44918	2.73143		0.3782	9.15262E-4		0.25869	0.00151
0.45079	0.75948		0.46372	6.50118		0.3785	9.15262E-4		0.25968	0.00151
0.43241	9.68756		0.4388	12.6066		0.3788	9.15262E-4		0.26068	0.00151
0.44879	0.68064		0.46096	0.42375		0.37909	9.15262E-4		0.26167	0.00151
0.45084	2.46125		0.48461	2.89467		0.37939	9.15262E-4		0.26266	0.00151
0.44248	2.4002		0.46704	3.19573		0.3795	9.15262E-4		0.26365	0.00151
0.44364	0.38462		0.47513	2.45835		0.37969	9.15262E-4		0.26464	0.00151
0.43654	1.59108		0.47973	3.42375		0.37999	9.15262E-4		0.265	0.00151
0.54665	0.37884		0.47189	9.6947		0.38028	9.15262E-4		0.26563	0.00151
0.44853	0.53549		0.4586	1.39905		0.38058	9.15262E-4		0.26662	0.00151
0.43489	2.49897		0.46215	2.09206		0.38088	9.15262E-4		0.26761	0.00151
0.43764	2.4211		0.46853	1.73838		0.38118	9.15262E-4		0.2686	0.00151
0.44239	2.11128		0.47121	8.64083		0.38147	9.15262E-4		0.26959	0.00151
0.46124	0.55558		0.46829	3.96607		0.38177	9.15262E-4		0.27059	0.00151
0.44942	0.52951		0.46492	9.15628		0.38207	9.15262E-4		0.27158	0.00151
0.45077	0.8736		0.46911	1.31066		0.38236	9.15262E-4		0.27257	0.00151
0.44625	0.87536		0.47086	3.64061		0.3825	9.15262E-4		0.27356	0.00151
0.45445	0.65835		0.48265	1.60136		0.38266	9.15262E-4		0.27455	0.00151
0.44416	2.65448		0.46728	7.36893		0.38296	9.15262E-4		0.275	0.00151
0.44216	2.92123		0.44964	8.41814		0.38326	9.15262E-4		0.27554	0.00151
0.43515	5.7339		0.46555	12.9983		0.38355	9.15262E-4		0.27653	0.00151
0.4496	0.71708		0.45579	15.6142		0.38385	9.15262E-4		0.27752	0.00151
0.43747	7.77048		0.47778	1.32562		0.38415	9.15262E-4		0.27851	0.00151
0.45518	0.48621		0.46311	11.2868		0.38445	9.15262E-4		0.2795	0.00151
0.44894	2.47459		0.45975	13.7463		0.38474	9.15262E-4		0.2805	0.00151
0.43483	3.3319		0.47072	28.2832		0.38504	9.15262E-4		0.28149	0.00151
0.44324	1.48057		0.46043	8.11993		0.38534	9.15262E-4		0.28248	0.00151
0.4443	3.74244		0.41989	26.3509		0.3855	9.15262E-4		0.28347	0.00151
0.44516	2.19763		0.44486	2.13994		0.38564	9.15262E-4		0.28446	0.00151
0.44419	4.31648		0.46701	0.9204		0.38593	9.15262E-4		0.285	0.00151
0.4383	7.31523		0.4748	4.4747		0.38623	9.15262E-4		0.28545	0.00151
0.44146	1.45844		0.46416	1.28221		0.38653	9.15262E-4		0.28644	0.00151
0.43626	3.5964		0.46296	6.4622		0.38682	9.15262E-4		0.28743	0.00151
0.44206	1.7318		0.47257	17.1597		0.38712	9.15262E-4		0.28842	0.00151
0.43718	2.76358		0.48254	32.1994		0.38742	9.15262E-4		0.28941	0.00151
0.43673	2.76508		0.46009	10.2271		0.38772	9.15262E-4		0.29041	0.00151
0.44597	1.3678		0.50002	0.29884		0.38801	9.15262E-4		0.2914	0.00151
0.45052	1.40975		0.46071	3.43392		0.38831	9.15262E-4		0.29239	0.00151
0.44308	0.51542		0.45812	1.45852		0.3885	9.15262E-4		0.29338	0.00151
0.44735	0.68638		0.46631	23.4713		0.38861	9.15262E-4		0.29437	0.00151
0.43318	7.22822		0.46354	3.1246		0.38891	9.15262E-4		0.295	0.00151
0.44543	0.80888		0.42145	2.84283		0.3892	9.15262E-4		0.29536	0.00151
0.44603	8.61525		0.46937	9.93206		0.3895	9.15262E-4		0.29635	0.00151
0.45815	0.70546		0.46808	1.53223		0.3898	9.15263E-4		0.29734	0.00151
0.45354	0.51158		0.46541	11.0317		0.39009	9.15263E-4		0.29833	0.00151
0.44481	0.76207		0.46204	1.63024		0.39039	9.15263E-4		0.29932	0.00151
0.43792	1.83987		0.47506	16.6998		0.39069	9.15263E-4		0.30032	0.00151
0.44394	3.02715		0.46323	2.37808		0.39099	9.15263E-4		0.30131	0.00151
0.43193	0.97461		0.47136	13.6073		0.39128	9.15264E-4		0.3023	0.00151
0.44118	0.92446		0.46461	10.6907		0.3915	9.15264E-4		0.30329	0.00151
0.45864	0.39269		0.45213	13.7872		0.39158	9.15264E-4		0.30428	0.00151
0.44637	3.08114		0.47329	2.71529		0.39188	9.15265E-4		0.305	0.00151
0.43699	4.2676		0.46042	4.93353		0.39218	9.15265E-4		0.30527	0.00151
0.45512	0.9314		0.49	0.65572		0.39247	9.15266E-4		0.30626	0.00151
0.43715	2.3511		0.47711	3.54292		0.39277	9.15267E-4		0.30725	0.00151
0.44753	1.16484		0.46317	1.38678		0.39307	9.15268E-4		0.30824	0.00151
0.44953	0.28599		0.46037	7.07762		0.39336	9.15269E-4		0.30923	0.00151
0.44277	0.56445		0.4387	6.37488		0.39366	9.15271E-4		0.31023	0.00151
0.44301	0.76108		0.46689	4.46751		0.39396	9.15273E-4		0.31122	0.00151
0.4437	3.07437		0.4859	10.5466		0.39426	9.15275E-4		0.31221	0.00151
0.44666	5.60712		0.46154	7.00434		0.3945	9.15277E-4		0.3132	0.00151
0.43858	3.36126		0.45097	3.93987		0.39455	9.15277E-4		0.31419	0.00151
0.44682	0.69072		0.46735	4.67418		0.39485	9.15281E-4		0.315	0.00151
0.44086	1.57614		0.47469	14.0835		0.39515	9.15284E-4		0.31518	0.00151
0.44556	3.35281		0.45933	4.51179		0.39545	9.15289E-4		0.31617	0.00151
0.44658	0.52375		0.46187	7.47162		0.39574	9.15294E-4		0.31716	0.00151
0.43623	8.21647		0.47007	10.3908		0.39604	9.153E-4		0.31815	0.00151
0.44817	10.6926		0.4665	26.1415		0.39634	9.15307E-4		0.31914	0.00151
0.43059	6.07304		0.46372	3.7039		0.39664	9.15316E-4		0.32014	0.00151
0.44817	3.26781		0.4673	29.3067		0.39693	9.15326E-4		0.32113	0.00151
0.4366	4.98994		0.45567	1.54404		0.39723	9.15338E-4		0.32212	0.00151
0.43908	0.988		0.47363	2.08022		0.3975	9.15351E-4		0.32311	0.00151
0.47607	0.34354		0.47058	3.49133		0.39753	9.15353E-4		0.3241	0.00151
0.46281	0.22006		0.24349	24.2062		0.39782	9.1537E-4		0.325	0.00151
0.4773	0.26829		0.48379	0.51925		0.39812	9.1539E-4		0.32509	0.00151
0.43068	1.42009		0.4671	7.8572		0.39842	9.15413E-4		0.32608	0.00151
0.43583	8.58822		0.46768	21.8361		0.39872	9.15441E-4		0.32707	0.00151
0.42017	15.0435		0.46623	12.4522		0.39901	9.15473E-4		0.32806	0.00151
0.45405	1.22808		0.46762	2.52224		0.39931	9.15511E-4		0.32905	0.00151
0.43317	5.8911		0.46525	18.3812		0.39961	9.15556E-4		0.33005	0.00151
0.45144	0.4721		0.47201	8.8099		0.39991	9.15608E-4		0.33104	0.00151
0.43757	0.6422		0.46115	28.4541		0.4002	9.15669E-4		0.33203	0.00151
0.43129	0.89797		0.47983	16.3633		0.4005	9.1574E-4		0.33302	0.00151
0.49441	0.24079		0.47139	1.66743		0.4008	9.15823E-4		0.33401	0.00151
0.42549	3.18472		0.46509	7.56821		0.40109	9.15919E-4		0.335	0.00151
0.50666	0.20845		0.47241	0.74169		0.40139	9.16032E-4		0.33599	0.00151
0.43226	5.67495		0.46557	4.92494		0.40169	9.16163E-4		0.33698	0.00151
0.4403	3.18084		0.42922	5.73007		0.40199	9.16315E-4		0.33797	0.00151
0.43792	2.69199		0.46508	1.83158		0.40228	9.16491E-4		0.33896	0.00151
0.43494	6.93507		0.45847	6.21986		0.40258	9.16696E-4		0.33995	0.00151
0.45169	4.52001		0.46934	0.73512		0.40288	9.16933E-4		0.34095	0.00151
0.5881	0.23829		0.46294	19.2354		0.40318	9.17206E-4		0.34194	0.00151
0.44741	1.4067		0.46925	1.78015		0.40347	9.17523E-4		0.34293	0.00151
0.46045	0.9046		0.46003	18.1516		0.4035	9.17554E-4		0.34392	0.00151
0.4426	0.87684		0.45731	8.84198		0.40377	9.17888E-4		0.34491	0.00151
0.44888	1.0227		0.47351	15.2231		0.40407	9.18309E-4		0.345	0.00151
0.44509	2.44404		0.45646	29.4618		0.40436	9.18794E-4		0.3459	0.00151
0.44599	1.57084		0.46955	3.64787		0.40466	9.19351E-4		0.34689	0.00151
0.43095	1.64265		0.4608	6.93566		0.40496	9.19992E-4		0.34788	0.00151
0.43638	6.28226		0.48167	0.72749		0.40526	9.20727E-4		0.34887	0.00151
0.43401	5.51974		0.46355	2.56173		0.40555	9.21571E-4		0.34986	0.00151
0.44903	3.26404		0.50119	0.24274		0.40585	9.22536E-4		0.35086	0.00151
0.45837	2.44667		0.47173	2.98936		0.40615	9.23641E-4		0.35185	0.00151
0.43672	0.64267		0.45919	4.67402		0.40645	9.24904E-4		0.35284	0.00151
0.43317	4.2242		0.47228	1.64975		0.4065	9.25152E-4		0.35383	0.00151
0.48123	0.33486		0.46624	11.363		0.40674	9.26345E-4		0.35482	0.00151
0.44429	1.71888		0.49461	0.25131		0.40704	9.27989E-4		0.355	0.00151
0.45494	1.26462		0.46046	4.78607		0.40734	9.29861E-4		0.35581	0.00151
0.44667	0.45078		0.46313	3.69623		0.40764	9.31991E-4		0.3568	0.00151
0.45033	0.54868		0.46915	6.93031		0.40793	9.34412E-4		0.35779	0.00151
0.45122	5.12668		0.46668	4.27516		0.40823	9.37161E-4		0.35878	0.00151
0.44363	4.71521		0.46835	18.6282		0.40853	9.40278E-4		0.35977	0.00151
0.43639	0.38436		0.45418	21.7102		0.40882	9.4381E-4		0.36077	0.00151
0.37665	4.21983		0.48319	1.70659		0.40912	9.47806E-4		0.36176	0.00151
0.44273	3.68846		0.47107	21.0287		0.40942	9.52322E-4		0.36275	0.00151
0.43255	2.36805		0.4592	0.20689		0.4095	9.53653E-4		0.36374	0.00151
0.44286	5.99725		0.46392	15.2819		0.40972	9.57422E-4		0.36473	0.00151
0.4449	0.28784		0.46814	4.40323		0.41001	9.63174E-4		0.365	0.00151
0.46343	0.79948		0.46507	6.74537		0.41031	9.69654E-4		0.36572	0.00151
0.43599	4.7157		0.46466	0.9708		0.41061	9.76946E-4		0.36671	0.00151
0.45745	2.04875		0.47308	1.60076		0.41091	9.85144E-4		0.3677	0.00151
0.39703	0.20294		0.46758	0.71868		0.4112	9.94348E-4		0.36869	0.00151
0.46619	0.35478		0.45151	7.46139		0.4115	0.001		0.36968	0.00151
0.4479	0.43087		0.46668	1.16236		0.4118	0.00102		0.37068	0.00151
0.43936	2.74015		0.46983	3.30259		0.41209	0.00103		0.37167	0.00151
0.43852	1.73236		0.46712	9.7555		0.41239	0.00104		0.37266	0.00151
0.45094	2.11977		0.59419	0.87087		0.4125	0.00105		0.37365	0.00151
0.44124	2.09042		0.46038	0.9214		0.41269	0.00106		0.37464	0.00151
0.45181	0.81863		0.4506	1.38503		0.41299	0.00108		0.375	0.00151
0.44642	1.43711		0.47831	3.89153		0.41328	0.0011		0.37563	0.00151
0.44117	1.23253		0.47123	8.75164		0.41358	0.00112		0.37662	0.00151
0.44298	4.10428		0.46188	8.78258		0.41388	0.00115		0.37761	0.00151
0.44554	0.73145		0.4631	3.53517		0.41418	0.00117		0.3786	0.00151
0.44689	0.65629		0.472	0.81991		0.41447	0.0012		0.37959	0.00151
0.43952	1.80287		0.4571	2.17727		0.41477	0.00124		0.38059	0.00151
0.44682	3.55069		0.48135	1.15874		0.41507	0.00127		0.38158	0.00151
0.44142	1.38456		0.47362	1.56897		0.41536	0.00132		0.38257	0.00151
0.44299	2.06173		0.46648	2.35102		0.4155	0.00134		0.38356	0.00151
0.43133	7.53689		0.46204	3.04745		0.41566	0.00136		0.38455	0.00151
0.44938	0.60359		0.46962	2.92985		0.41596	0.00141		0.385	0.00151
0.43871	2.95496		0.46542	0.57071		0.41626	0.00147		0.38554	0.00151
0.46679	0.45854		0.46682	5.25686		0.41655	0.00153		0.38653	0.00151
0.44447	0.75171		0.46982	25.5275		0.41685	0.0016		0.38752	0.00151
0.42891	3.67146		0.4469	1.40681		0.41715	0.00167		0.38851	0.00151
0.25008	0.39497		0.46234	7.52207		0.41745	0.00175		0.3895	0.00151
0.43612	0.92067		0.47088	5.95751		0.41774	0.00184		0.3905	0.00151
0.43795	1.70073		0.46599	4.34229		0.41804	0.00194		0.39149	0.00151
0.43249	3.87839		0.481	2.03044		0.41834	0.00204		0.39248	0.00151
0.44702	1.74399		0.46372	7.03431		0.4185	0.00211		0.39347	0.00151
0.47515	0.31662		0.46611	3.06345		0.41864	0.00216		0.39446	0.00151
0.45095	0.90682		0.47926	1.36364		0.41893	0.00229		0.395	0.00151
0.44787	2.71036		0.47162	9.66287		0.41923	0.00242		0.39545	0.00151
0.4427	3.86176		0.47116	7.32403		0.41953	0.00257		0.39644	0.00151
0.40809	3.56707		0.46666	3.17525		0.41982	0.00274		0.39743	0.00151
0.42977	3.08264		0.46515	2.16803		0.42012	0.00291		0.39842	0.00151
0.43823	2.11788		0.46286	9.52162		0.42042	0.0031		0.39941	0.00151
0.43746	0.33272		0.90499	0.21947		0.42072	0.00331		0.40041	0.00151
0.43901	0.9278		0.46482	4.37019		0.42101	0.00354		0.4014	0.00151
0.44139	0.88062		0.45622	15.9094		0.42131	0.00378		0.40239	0.00151
0.43794	3.32326		0.46666	9.33883		0.4215	0.00394		0.40338	0.00151
0.43972	1.74035		0.46144	1.01287		0.42161	0.00404		0.40437	0.00151
0.43868	0.851		0.46323	14.7466		0.42191	0.00432		0.405	0.00151
0.43675	1.8566		0.47198	12.8643		0.4222	0.00462		0.40536	0.00151
0.44413	2.14344		0.4166	6.85518		0.4225	0.00495		0.40635	0.00151
0.43679	7.014		0.46203	15.1096		0.4228	0.0053		0.40734	0.00151
0.43282	5.45928		0.48074	0.67036		0.42309	0.00568		0.40833	0.00151
0.43822	7.22931		0.45084	6.30996		0.42339	0.00608		0.40932	0.00151
0.45044	0.99701		0.4649	20.4721		0.42369	0.00651		0.41032	0.00151
0.45003	0.90034		0.48787	0.50161		0.42399	0.00697		0.41131	0.00151
0.42963	7.87926		0.46412	8.82458		0.42428	0.00746		0.4123	0.00151
0.44015	4.95206		0.45843	18.8382		0.4245	0.00784		0.41329	0.00151
0.44066	4.39806		0.46259	1.65558		0.42458	0.00798		0.41428	0.00151
0.45343	0.37107		0.47175	1.89607		0.42488	0.00854		0.415	0.00151
0.41798	0.91339		0.46649	18.1263		0.42518	0.00913		0.41527	0.00151
0.4439	6.78628		0.4746	18.105		0.42547	0.00976		0.41626	0.00151
0.45375	15.1442		0.46228	8.84048		0.42577	0.01043		0.41725	0.00151
0.44397	1.4404		0.46453	0.55977		0.42607	0.01114		0.41824	0.00151
0.43743	7.70655		0.46682	4.82699		0.42636	0.01189		0.41923	0.00151
0.43792	0.88691		0.4765	2.74721		0.42666	0.01268		0.42023	0.00151
0.44653	2.05082		0.4646	0.81344		0.42696	0.01352		0.42122	0.00151
0.43242	0.49826		0.46786	3.53812		0.42726	0.0144		0.42221	0.00151
0.44835	2.10782		0.46196	3.6278		0.4275	0.01516		0.4232	0.00151
0.44438	1.65695		0.4683	2.48106		0.42755	0.01533		0.42419	0.00151
0.44887	4.94114		0.45835	9.52304		0.42785	0.01631		0.425	0.00151
0.40856	8.03867		0.46719	3.3472		0.42815	0.01733		0.42518	0.00151
0.43862	1.28996		0.47285	5.5682		0.42845	0.01841		0.42617	0.00151
0.43842	2.92845		0.4749	16.6227		0.42874	0.01954		0.42716	0.00151
0.50812	3.70744		0.47465	20.1385		0.42904	0.02071		0.42815	0.00151
0.44695	3.08689		0.51625	0.59197		0.42934	0.02195		0.42914	0.00151
0.44551	1.64077		0.48539	3.92023		0.42964	0.02323		0.43014	0.00151
0.4608	0.40441		0.49029	0.34222		0.42993	0.02457		0.43113	0.00152
0.43917	7.26384		0.46524	1.99135		0.43023	0.02597		0.43212	0.00152
0.44749	1.40405		0.47233	12.3017		0.4305	0.02728		0.43311	0.00153
0.44547	0.77086		0.46253	3.23206		0.43053	0.02741		0.4341	0.00154
0.44378	1.60692		0.4672	2.3271		0.43082	0.02892		0.435	0.00156
0.42964	4.33177		0.45869	2.37056		0.43112	0.03047		0.43509	0.00156
0.44185	1.97011		0.46787	4.46534		0.43142	0.03209		0.43608	0.00159
0.4317	2.42493		0.45934	12.7231		0.43172	0.03375		0.43707	0.00165
0.43886	3.26039		0.48142	10.4406		0.43201	0.03547		0.43806	0.00173
0.44861	1.71863		0.46747	11.7001		0.43231	0.03724		0.43905	0.00187
0.44697	2.93761		0.47631	1.37317		0.43261	0.03906		0.44005	0.00208
0.43481	6.10114		0.46977	3.65266		0.43291	0.04093		0.44104	0.00239
0.43963	4.28574		0.46099	5.2716		0.4332	0.04285		0.44203	0.00286
0.42647	0.77909		0.45601	12.6826		0.4335	0.04482		0.44302	0.00355
0.43311	11.7446		0.46311	3.99119		0.4338	0.04683		0.44401	0.00453
0.43969	1.92687		0.4662	4.64788		0.43409	0.04888		0.445	0.00593
0.44956	1.32137		0.48975	1.96826		0.43439	0.05098		0.445	0.00593
0.46812	0.38713		0.46351	7.39193		0.43469	0.05311		0.44599	0.00788
0.43237	1.8858		0.46446	9.45114		0.43499	0.05527		0.44698	0.01054
0.4539	0.72819		0.46855	9.59911		0.43528	0.05746		0.44797	0.01412
0.43782	12.0692		0.48183	0.40798		0.43558	0.05969		0.44896	0.01886
0.44518	0.64489		0.46179	13.4891		0.43588	0.06193		0.44995	0.02502
0.43431	1.72774		0.46166	14.123		0.43618	0.0642		0.45095	0.03288
0.4938	0.23666		0.46674	7.84042		0.43647	0.06648		0.45194	0.04275
0.43617	8.73286		0.4636	6.05141		0.4365	0.06669		0.45293	0.0549
0.42982	5.5764		0.47421	2.86303		0.43677	0.06878		0.45392	0.06959
0.44684	0.96413		0.46528	27.24		0.43707	0.07108		0.45491	0.08701
0.43422	4.33517		0.46628	0.71741		0.43736	0.07338		0.455	0.08873
0.43448	8.85582		0.27394	0.37319		0.43766	0.07568		0.4559	0.10726
0.44003	5.2041		0.46055	3.64505		0.43796	0.07798		0.45689	0.13034
0.43749	2.31396		0.47207	2.4712		0.43826	0.08026		0.45788	0.15609
0.43109	4.18636		0.47824	8.28658		0.43855	0.08253		0.45887	0.18418
0.38697	0.49774		0.46771	3.95556		0.43885	0.08477		0.45986	0.21413
0.44477	0.51246		0.4662	12.7612		0.43915	0.08699		0.46086	0.24525
0.44586	0.62883		0.46705	13.6271		0.43945	0.08917		0.46185	0.27672
0.45051	0.3555		0.19403	1.2577		0.4395	0.08956		0.46284	0.30755
0.44645	3.38967		0.4631	14.8112		0.43974	0.09131		0.46383	0.33671
0.43816	3.18692		0.46819	4.53447		0.44004	0.09341		0.46482	0.36311
0.42428	0.70171		0.46561	8.67157		0.44034	0.09546		0.465	0.36753
0.44423	5.675		0.46687	7.13728		0.44064	0.09746		0.46581	0.3857
0.39195	1.1388		0.46099	1.8304		0.44093	0.0994		0.4668	0.40355
0.44065	0.33107		0.45781	9.21234		0.44123	0.10127		0.46779	0.41588
0.47073	0.79883		0.47554	1.12264		0.44153	0.10306		0.46878	0.42214
0.42798	1.58826		0.46616	5.83308		0.44182	0.10479		0.46977	0.42206
0.44894	2.78251		0.46446	9.9447		0.44212	0.10643		0.47077	0.41563
0.44809	1.27335		0.46271	3.29164		0.44242	0.10799		0.47176	0.40315
0.43597	3.42062		0.47472	8.34867		0.4425	0.1084		0.47275	0.38517
0.43706	1.15133		0.47144	13.3468		0.44272	0.10946		0.47374	0.36247
0.45406	0.41208		0.46309	11.695		0.44301	0.11083		0.47473	0.33598
0.43819	5.04386		0.47947	18.436		0.44331	0.1121		0.475	0.32824
0.44422	0.46278		0.46279	32.1399		0.44361	0.11328		0.47572	0.30677
0.439	1.31207		0.47214	1.49317		0.44391	0.11435		0.47671	0.2759
0.44506	1.04217		0.46482	2.09596		0.4442	0.1153		0.4777	0.24443
0.36953	8.66582		0.46532	8.23218		0.4445	0.11615		0.47869	0.21333
0.45585	2.15491		0.47627	2.42479		0.4448	0.11689		0.47968	0.18343
0.44078	0.8147		0.46505	3.78903		0.44509	0.1175		0.48068	0.15539
0.45098	1.21955		0.4689	22.8307		0.44539	0.118		0.48167	0.1297
0.44578	1.22471		0.45028	1.74417		0.4455	0.11815		0.48266	0.1067
0.44733	2.57128		0.45109	0.20678		0.44569	0.11838		0.48365	0.08652
0.44163	4.89706		0.46436	0.97851		0.44599	0.11864		0.48464	0.06917
0.44119	0.68916		0.4621	17.6444		0.44628	0.11877		0.485	0.06355
0.4485	1.74911		0.4693	39.8936		0.44658	0.11878		0.48563	0.05455
0.47937	0.26106		0.46962	35.4664		0.44688	0.11867		0.48662	0.04247
0.4377	4.82372		0.47898	0.46395		0.44718	0.11844		0.48761	0.03266
0.43896	1.36289		0.46406	7.55693		0.44747	0.11809		0.4886	0.02484
0.43557	4.39177		0.46752	6.87322		0.44777	0.11762		0.48959	0.01872
0.43231	0.76414		0.46969	9.34263		0.44807	0.11702		0.49059	0.01401
0.44666	3.00843		0.46446	14.9143		0.44836	0.11632		0.49158	0.01046
0.43487	1.78384		0.47014	14.0871		0.4485	0.11595		0.49257	0.00782
0.43143	1.69677		0.46163	1.4274		0.44866	0.11549		0.49356	0.00589
0.43846	1.56764		0.46519	1.33266		0.44896	0.11456		0.49455	0.0045
0.44316	3.57192		0.46102	3.05138		0.44926	0.11351		0.495	0.00402
0.43706	5.39589		0.47418	20.0196		0.44955	0.11236		0.49554	0.00353
0.44457	3.3329		0.46439	15.4992		0.44985	0.1111		0.49653	0.00285
0.42838	2.13951		0.46619	2.67226		0.45015	0.10975		0.49752	0.00238
0.45076	0.46649		0.46974	1.25632		0.45045	0.1083		0.49851	0.00207
0.43536	1.88508		0.46046	20.6509		0.45074	0.10676		0.4995	0.00187
0.43616	5.90674		0.47322	6.95621		0.45104	0.10514		0.5005	0.00173
0.43504	2.26388		0.46008	18.2961		0.45134	0.10343		0.50149	0.00165
0.43286	3.73555		0.46088	5.23547		0.4515	0.10247		0.50248	0.00159
0.44492	1.32884		0.4678	2.94001		0.45164	0.10165		0.50347	0.00156
0.44072	4.57962		0.47322	11.866		0.45193	0.09979		0.50446	0.00154
0.462	0.48416		0.46629	9.35994		0.45223	0.09787		0.505	0.00153
0.43226	2.32073		0.51758	0.21845		0.45253	0.09589		0.50545	0.00153
0.43492	2.24494		0.47552	1.65789		0.45282	0.09385		0.50644	0.00152
0.44726	1.82813		0.46713	1.32126		0.45312	0.09176		0.50743	0.00152
0.46527	0.23543		0.46567	3.7184		0.45342	0.08962		0.50842	0.00151
0.44501	3.66006		0.45926	12.6407		0.45372	0.08745		0.50941	0.00151
0.44599	3.34139		0.47329	2.00079		0.45401	0.08524		0.51041	0.00151
0.43978	2.4543		0.45737	3.23945		0.45431	0.083		0.5114	0.00151
0.43988	6.26141		0.46184	16.191		0.4545	0.08156		0.51239	0.00151
0.43345	5.19858		0.47069	1.55072		0.45461	0.08074		0.51338	0.00151
0.44955	2.80968		0.46336	3.98957		0.45491	0.07846		0.51437	0.00151
0.45518	4.75897		0.48259	1.03274		0.4552	0.07616		0.515	0.00151
0.43018	3.79895		0.18711	0.31565		0.4555	0.07386		0.51536	0.00151
0.44738	1.87961		0.48497	0.52471		0.4558	0.07156		0.51635	0.00151
0.44532	3.46833		0.46419	9.51404		0.45609	0.06926		0.51734	0.00151
0.45556	0.31129		0.50791	0.24316		0.45639	0.06696		0.51833	0.00151
0.43733	5.41874		0.46651	7.63592		0.45669	0.06468		0.51932	0.00151
0.43751	2.89547		0.44774	4.40677		0.45699	0.06241		0.52032	0.00151
0.44908	0.96478		0.46954	6.09754		0.45728	0.06016		0.52131	0.00151
0.44119	0.85596		0.22835	0.21092		0.4575	0.05853		0.5223	0.00151
0.44236	5.52472		0.46531	7.49028		0.45758	0.05793		0.52329	0.00151
0.44142	0.53348		0.46393	12.795		0.45788	0.05573		0.52428	0.00151
0.44194	1.64242		0.47288	10.8514		0.45818	0.05356		0.525	0.00151
0.44057	4.05835		0.46975	2.15659		0.45847	0.05142		0.52527	0.00151
0.43871	1.16241		0.46015	3.40112		0.45877	0.04932		0.52626	0.00151
0.42654	0.66109		0.49099	0.42221		0.45907	0.04726		0.52725	0.00151
0.44857	5.32036		0.44481	1.59272		0.45936	0.04524		0.52824	0.00151
0.43934	5.64398		0.47644	5.77983		0.45966	0.04326		0.52923	0.00151
0.43491	3.9186		0.46507	1.04736		0.45996	0.04133		0.53023	0.00151
0.43455	9.54831		0.44013	2.69076		0.46026	0.03945		0.53122	0.00151
0.39231	3.92756		0.47693	3.44381		0.4605	0.03795		0.53221	0.00151
0.42749	4.23154		0.46831	5.46179		0.46055	0.03762		0.5332	0.00151
0.42268	1.27557		0.49247	0.94469		0.46085	0.03584		0.53419	0.00151
0.44372	1.39811		0.46555	5.48698		0.46115	0.03411		0.535	0.00151
0.43366	2.88259		0.46101	3.52425		0.46145	0.03243		0.53518	0.00151
0.43465	12.7233		0.47397	0.69135		0.46174	0.03081		0.53617	0.00151
0.42056	2.03088		0.4724	3.87141		0.46204	0.02924		0.53716	0.00151
0.44355	0.42236		0.46636	2.99784		0.46234	0.02772		0.53815	0.00151
0.42488	1.78716		0.46738	11.2461		0.46264	0.02626		0.53914	0.00151
0.44353	2.74384		0.46036	9.51837		0.46293	0.02486		0.54014	0.00151
0.43819	3.13676		0.46817	6.70314		0.46323	0.02351		0.54113	0.00151
0.43866	6.1571		0.46206	2.11224		0.4635	0.02233		0.54212	0.00151
0.44137	0.84775		0.46111	4.12176		0.46353	0.02221		0.54311	0.00151
0.44208	4.18828		0.47279	3.15823		0.46382	0.02097		0.5441	0.00151
0.44913	0.55144		0.70832	0.27683		0.46412	0.01978		0.545	0.00151
0.44495	0.88654		0.47089	1.28736		0.46442	0.01864		0.54509	0.00151
0.43631	1.17544		0.45887	3.08071		0.46472	0.01755		0.54608	0.00151
0.4436	2.41306		0.47008	1.14382		0.46501	0.01652		0.54707	0.00151
0.44174	3.46686		0.46136	2.24524		0.46531	0.01553		0.54806	0.00151
0.42294	4.73055		0.46519	2.75129		0.46561	0.01459		0.54905	0.00151
0.44149	1.86773		0.45953	8.82963		0.46591	0.0137		0.55005	0.00151
0.43615	7.80413		0.47359	5.7674		0.4662	0.01285		0.55104	0.00151
0.43983	6.73641		0.46657	2.00262		0.4665	0.01205		0.55203	0.00151
0.43783	3.70022		0.46329	1.12182		0.4668	0.01129		0.55302	0.00151
0.43873	2.78292		0.46338	5.52405		0.46709	0.01058		0.55401	0.00151
0.4331	2.95036		0.46256	15.7216		0.46739	0.0099		0.555	0.00151
0.43105	0.51999		0.47062	15.1311		0.46769	0.00926		0.55599	0.00151
0.45879	0.36353		0.44453	18.4894		0.46799	0.00866		0.55698	0.00151
0.45447	1.83719		0.4825	0.82975		0.46828	0.0081		0.55797	0.00151
0.44396	0.41453		0.46528	12.3133		0.46858	0.00757		0.55896	0.00151
0.44296	1.26294		0.39008	30.8992		0.46888	0.00707		0.55995	0.00151
0.44609	1.5838		0.94256	0.25509		0.46918	0.0066		0.56095	0.00151
0.45106	1.00721		0.89168	0.62476		0.46947	0.00617		0.56194	0.00151
0.4474	3.7196		0.90166	0.31169		0.4695	0.00613		0.56293	0.00151
0.4504	5.03748		0.84702	0.63157		0.46977	0.00576		0.56392	0.00151
0.44705	0.53401		0.9399	0.25764		0.47007	0.00538		0.56491	0.00151
0.42973	7.4732		0.86558	0.78287		0.47036	0.00502		0.565	0.00151
0.44404	1.54006		0.82335	0.33001		0.47066	0.00469		0.5659	0.00151
0.45538	0.52633		0.84407	0.31808		0.47096	0.00438		0.56689	0.00151
0.44324	0.59572		0.91113	0.33273		0.47126	0.0041		0.56788	0.00151
0.43948	1.81827		0.925	0.32483		0.47155	0.00383		0.56887	0.00151
0.4252	1.12216		0.94669	0.30133		0.47185	0.00358		0.56986	0.00151
0.43462	2.21066		0.88554	0.26278		0.47215	0.00336		0.57086	0.00151
0.45736	0.43828		0.8988	0.20664		0.47245	0.00315		0.57185	0.00151
0.44884	0.76257		0.89292	0.27345		0.4725	0.00311		0.57284	0.00151
0.42362	1.99731		0.84108	0.39629		0.47274	0.00295		0.57383	0.00151
0.42487	7.16747		0.84409	0.38917		0.47304	0.00277		0.57482	0.00151
0.46643	0.20842		0.82727	2.63979		0.47334	0.00261		0.575	0.00151
0.44323	1.64711		0.85106	0.3082		0.47364	0.00245		0.57581	0.00151
0.44321	2.96696		0.93337	0.25539		0.47393	0.00231		0.5768	0.00151
0.44234	0.62913		0.86224	0.66059		0.47423	0.00218		0.57779	0.00151
0.44212	9.01658		0.81966	0.73252		0.47453	0.00207		0.57878	0.00151
0.42562	2.80223		0.85721	0.2111		0.47482	0.00196		0.57977	0.00151
0.42941	7.92803		0.79953	1.08066		0.47512	0.00186		0.58077	0.00151
0.44934	4.24726		0.88222	0.2928		0.47542	0.00177		0.58176	0.00151
0.43999	0.39681		0.82423	0.9031		0.4755	0.00175		0.58275	0.00151
0.44073	5.63846		0.85531	1.38586		0.47572	0.00169		0.58374	0.00151
0.44609	0.60783		0.78195	1.59665		0.47601	0.00161		0.58473	0.00151
0.44775	1.79617		0.86882	2.38776		0.47631	0.00154		0.585	0.00151
0.47235	0.26875		0.81084	0.71945		0.47661	0.00148		0.58572	0.00151
0.4528	0.61059		0.8333	0.86895		0.47691	0.00142		0.58671	0.00151
0.4397	0.80929		0.93418	0.27093		0.4772	0.00137		0.5877	0.00151
0.4297	3.42867		0.78234	0.36789		0.4775	0.00133		0.58869	0.00151
0.43906	6.17467		0.78267	1.51575		0.4778	0.00128		0.58968	0.00151
0.44172	2.94009		0.79175	0.69975		0.47809	0.00124		0.59068	0.00151
0.43838	2.25439		0.80411	0.31339		0.47839	0.00121		0.59167	0.00151
0.43205	3.97431		0.93838	0.20017		0.4785	0.0012		0.59266	0.00151
0.43012	2.05078		0.92622	0.22306		0.47869	0.00118		0.59365	0.00151
0.40186	1.12794		0.8743	0.63726		0.47899	0.00115		0.59464	0.00151
0.43047	3.10152		0.76523	2.66786		0.47928	0.00113		0.595	0.00151
0.43582	3.46515		0.78652	1.12145		0.47958	0.0011		0.59563	0.00151
0.41989	11.6897		0.74459	0.30155		0.47988	0.00108		0.59662	0.00151
0.45383	0.4674		0.97161	0.25063		0.48018	0.00106		0.59761	0.00151
0.4436	2.00778		0.85588	0.58456		0.48047	0.00105		0.5986	0.00151
0.39291	13.5341		0.88312	0.44776		0.48077	0.00103		0.59959	0.00151
0.44423	0.58149		0.92214	1.24543		0.48107	0.00102		0.60059	0.00151
0.43369	3.12354		0.83755	0.20052		0.48136	0.00101		0.60158	0.00151
0.40512	1.09877		0.80381	1.27263		0.4815	0.001		0.60257	0.00151
0.3869	1.58417		0.89262	0.29604		0.48166	9.9641E-4		0.60356	0.00151
0.45023	0.97909		0.86689	0.47816		0.48196	9.86982E-4		0.60455	0.00151
0.43685	2.43865		0.96429	0.33172		0.48226	9.78582E-4		0.605	0.00151
0.44043	5.76259		0.84357	0.32396		0.48255	9.71109E-4		0.60554	0.00151
0.44251	8.21997		0.34969	4.88663		0.48285	9.64466E-4		0.60653	0.00151
0.44465	0.9279		0.96792	0.22789		0.48315	9.58569E-4		0.60752	0.00151
0.44704	2.78925		0.88368	0.32697		0.48345	9.53338E-4		0.60851	0.00151
0.44505	0.9555		0.8109	0.33849		0.48374	9.48705E-4		0.6095	0.00151
0.47461	0.37168		0.93354	0.39081		0.48404	9.44605E-4		0.6105	0.00151
0.48611	0.24941		0.90376	0.22642		0.48434	9.40981E-4		0.61149	0.00151
0.46523	0.20535		0.35981	7.97626		0.4845	9.39186E-4		0.61248	0.00151
0.42603	2.05369		0.86592	0.35397		0.48464	9.37781E-4		0.61347	0.00151
0.44295	0.82748		0.9517	0.29219		0.48493	9.34959E-4		0.61446	0.00151
0.44467	1.0429		0.81876	0.28482		0.48523	9.32472E-4		0.615	0.00151
0.43809	6.78465		0.83574	0.3915		0.48553	9.30284E-4		0.61545	0.00151
0.43598	8.37405		0.90119	0.36048		0.48582	9.28361E-4		0.61644	0.00151
0.44345	2.05903		0.86365	0.342		0.48612	9.26671E-4		0.61743	0.00151
0.43083	2.81461		0.9075	0.21463		0.48642	9.2519E-4		0.61842	0.00151
0.44267	3.14162		0.86072	0.36066		0.48672	9.23892E-4		0.61941	0.00151
0.43182	0.36424		0.88169	0.31415		0.48701	9.22755E-4		0.62041	0.00151
0.4454	0.83909		0.8608	0.38956		0.48731	9.21762E-4		0.6214	0.00151
0.44258	3.28766		0.88478	0.23009		0.4875	9.21196E-4		0.62239	0.00151
0.44301	2.94294		0.89263	0.24351		0.48761	9.20894E-4		0.62338	0.00151
0.44292	3.23249		0.85604	0.32847		0.48791	9.20138E-4		0.62437	0.00151
0.4308	8.47185		0.9142	0.22957		0.4882	9.19478E-4		0.625	0.00151
0.43069	0.30293		0.86653	0.21971		0.4885	9.18904E-4		0.62536	0.00151
0.44895	4.03941		0.93283	0.28555		0.4888	9.18405E-4		0.62635	0.00151
0.45441	1.01581		0.89249	0.44265		0.48909	9.17971E-4		0.62734	0.00151
0.44632	1.4965		0.90859	0.23528		0.48939	9.17595E-4		0.62833	0.00151
0.4391	3.72028		0.93383	0.22958		0.48969	9.17269E-4		0.62932	0.00151
0.46194	0.38331		0.89672	0.51679		0.48999	9.16987E-4		0.63032	0.00151
0.44854	1.6048		0.81178	0.21368		0.49028	9.16743E-4		0.63131	0.00151
0.441	4.46212		0.85947	1.7536		0.4905	9.16586E-4		0.6323	0.00151
0.44145	1.83571		0.89532	0.2192		0.49058	9.16532E-4		0.63329	0.00151
0.43326	2.03616		0.93582	0.20264		0.49088	9.1635E-4		0.63428	0.00151
0.44531	1.15184		0.87536	0.24539		0.49118	9.16193E-4		0.635	0.00151
0.43328	11.9042		0.90546	0.30198		0.49147	9.16058E-4		0.63527	0.00151
0.43334	4.16095		0.81294	0.23808		0.49177	9.15942E-4		0.63626	0.00151
0.43977	2.26887		0.91633	0.42578		0.49207	9.15842E-4		0.63725	0.00151
0.43636	1.74793		0.9106	0.20232		0.49236	9.15756E-4		0.63824	0.00151
0.44756	2.18214		0.89005	0.24446		0.49266	9.15683E-4		0.63923	0.00151
0.45096	0.9186		0.36173	20.5753		0.49296	9.1562E-4		0.64023	0.00151
0.4355	2.40714		0.87415	0.35985		0.49326	9.15566E-4		0.64122	0.00151
0.43761	1.59818		0.90316	0.37968		0.4935	9.15528E-4		0.64221	0.00151
0.43719	2.07014		0.36927	34.4786		0.49355	9.1552E-4		0.6432	0.00151
0.43338	6.3692		0.90435	0.80844		0.49385	9.15481E-4		0.64419	0.00151
0.43873	5.20392		0.88597	0.31727		0.49415	9.15447E-4		0.645	0.00151
0.44081	1.99899		0.38611	6.65726		0.49445	9.15419E-4		0.64518	0.00151
0.43979	4.41119		0.89665	0.291		0.49474	9.15394E-4		0.64617	0.00151
0.44966	7.49976		0.91963	0.22135		0.49504	9.15374E-4		0.64716	0.00151
0.43605	0.76868		0.91824	0.20446		0.49534	9.15356E-4		0.64815	0.00151
0.4354	2.83825		0.86852	0.23042		0.49564	9.15341E-4		0.64914	0.00151
0.45327	0.26398		0.46984	15.669		0.49593	9.15329E-4		0.65014	0.00151
0.43898	8.10659		0.46048	3.3625		0.49623	9.15318E-4		0.65113	0.00151
0.43989	1.93074		0.48072	2.29592		0.4965	9.1531E-4		0.65212	0.00151
0.44216	1.10028		0.4779	5.88434		0.49653	9.15309E-4		0.65311	0.00151
0.44184	0.98192		0.47227	2.79455		0.49682	9.15301E-4		0.6541	0.00151
0.44467	1.15238		0.47297	4.72698		0.49712	9.15295E-4		0.655	0.00151
0.44238	2.92539		0.42973	13.1141		0.49742	9.1529E-4		0.65509	0.00151
0.45919	1.63543		0.46909	4.03377		0.49772	9.15285E-4		0.65608	0.00151
0.44338	1.39771		0.45751	14.1011		0.49801	9.15281E-4		0.65707	0.00151
0.4407	7.12476		0.46154	11.6611		0.49831	9.15278E-4		0.65806	0.00151
0.43524	1.75044		0.47038	11.0989		0.49861	9.15275E-4		0.65905	0.00151
0.46089	0.80206		0.45871	10.8403		0.49891	9.15273E-4		0.66005	0.00151
0.44008	2.72337		0.47028	1.03934		0.4992	9.15271E-4		0.66104	0.00151
0.44432	0.5574		0.46805	1.59502		0.4995	9.1527E-4		0.66203	0.00151
0.43953	7.79938		0.47653	1.99319		0.4998	9.15268E-4		0.66302	0.00151
0.43418	5.9432		0.47735	9.74798		0.50009	9.15267E-4		0.66401	0.00151
0.43683	2.76823		0.46977	4.26031		0.50039	9.15266E-4		0.665	0.00151
0.45002	0.7928		0.4662	10.6621		0.50069	9.15265E-4		0.66599	0.00151
0.45971	0.477		0.46953	9.64837		0.50099	9.15265E-4		0.66698	0.00151
0.44013	2.49834		0.46054	9.03162		0.50128	9.15264E-4		0.66797	0.00151
0.43936	2.87308		0.46158	15.1409		0.50158	9.15264E-4		0.66896	0.00151
0.43576	2.62775		0.45952	15.3949		0.50188	9.15264E-4		0.66995	0.00151
0.43528	1.06303		0.47676	15.3997		0.50218	9.15263E-4		0.67095	0.00151
0.44053	2.94317		0.45826	3.09719		0.50247	9.15263E-4		0.67194	0.00151
0.459	0.81864		0.46626	4.84273		0.5025	9.15263E-4		0.67293	0.00151
0.44883	2.18424		0.47911	1.14879		0.50277	9.15263E-4		0.67392	0.00151
0.46034	0.2863		0.46161	14.3564		0.50307	9.15263E-4		0.67491	0.00151
0.46168	0.45627		0.46828	5.43041		0.50336	9.15262E-4		0.675	0.00151
0.4907	0.24449		0.46318	1.81939		0.50366	9.15262E-4		0.6759	0.00151
0.44512	1.1749		0.46719	10.1311		0.50396	9.15262E-4		0.67689	0.00151
0.43307	9.15663		0.48149	3.52769		0.50426	9.15262E-4		0.67788	0.00151
0.42813	3.21547		0.47553	12.3165		0.50455	9.15262E-4		0.67887	0.00151
0.44533	1.59273		0.47235	3.5386		0.50485	9.15262E-4		0.67986	0.00151
0.45066	0.7489		0.46441	22.1224		0.50515	9.15262E-4		0.68086	0.00151
0.44326	0.78259		0.45822	7.69426		0.50545	9.15262E-4		0.68185	0.00151
0.44349	0.54185		0.45911	4.66887		0.5055	9.15262E-4		0.68284	0.00151
0.45046	2.33693		0.47491	13.0722		0.50574	9.15262E-4		0.68383	0.00151
0.46753	0.28848		0.46785	3.35899		0.50604	9.15262E-4		0.68482	0.00151
0.42089	2.10237		0.42195	0.79914		0.50634	9.15262E-4		0.685	0.00151
0.45827	0.66266		0.49187	0.85825		0.50664	9.15262E-4		0.68581	0.00151
0.43475	5.15401		0.46548	21.422		0.50693	9.15262E-4		0.6868	0.00151
0.52718	0.45873		0.46504	8.56261		0.50723	9.15262E-4		0.68779	0.00151
0.45603	0.83902		0.47176	1.75544		0.50753	9.15262E-4		0.68878	0.00151
0.44322	1.98794		0.46566	14.4533		0.50782	9.15262E-4		0.68977	0.00151
0.44604	2.02099		0.4693	9.20004		0.50812	9.15262E-4		0.69077	0.00151
0.43561	3.37133		0.45753	1.44782		0.50842	9.15262E-4		0.69176	0.00151
0.44855	1.07968		0.47587	8.34438		0.5085	9.15262E-4		0.69275	0.00151
0.43802	2.57982		0.46804	3.8881		0.50872	9.15262E-4		0.69374	0.00151
0.43839	2.30242		0.44718	2.1722		0.50901	9.15262E-4		0.69473	0.00151
0.44018	2.59838		0.45716	7.15772		0.50931	9.15262E-4		0.695	0.00151
0.44564	2.14451		0.47209	1.78409		0.50961	9.15262E-4		0.69572	0.00151
0.45915	1.14786		0.46298	17.7451		0.50991	9.15262E-4		0.69671	0.00151
0.44511	1.6635		0.467	3.8046		0.5102	9.15262E-4		0.6977	0.00151
0.45215	0.68581		0.47804	0.67792		0.5105	9.15262E-4		0.69869	0.00151
0.43173	7.88446		0.46717	2.73575		0.5108	9.15262E-4		0.69968	0.00151
0.43517	1.42233		0.47669	3.86432		0.51109	9.15262E-4		0.70068	0.00151
0.43433	5.73778		0.47065	2.38937		0.51139	9.15262E-4		0.70167	0.00151
0.44774	0.36941		0.47397	5.52163		0.5115	9.15262E-4		0.70266	0.00151
0.98585	0.28742		0.47347	1.84563		0.51169	9.15262E-4		0.70365	0.00151
0.43542	4.99972		0.46692	14.4324		0.51199	9.15262E-4		0.70464	0.00151
0.46498	0.38264		0.46048	3.20852		0.51228	9.15262E-4		0.705	0.00151
0.44182	6.17953		0.46447	1.74892		0.51258	9.15262E-4		0.70563	0.00151
0.44457	1.96396		0.46133	3.55898		0.51288	9.15262E-4		0.70662	0.00151
0.43483	0.62508		0.46907	4.93094		0.51318	9.15262E-4		0.70761	0.00151
0.44801	1.86011		0.47268	3.14127		0.51347	9.15262E-4		0.7086	0.00151
0.44918	2.95549		0.46179	2.09631		0.51377	9.15262E-4		0.70959	0.00151
0.44302	5.59703		0.46879	25.8663		0.51407	9.15262E-4		0.71059	0.00151
0.42957	6.18399		0.45004	4.54591		0.51436	9.15262E-4		0.71158	0.00151
0.45527	0.4345		0.46503	10.8308		0.5145	9.15262E-4		0.71257	0.00151
0.43645	9.10735		0.46488	10.5951		0.51466	9.15262E-4		0.71356	0.00151
0.44431	2.21401		0.46669	7.82663		0.51496	9.15262E-4		0.71455	0.00151
0.44777	1.57653		0.47606	3.54276		0.51526	9.15262E-4		0.715	0.00151
0.44281	2.80773		0.52548	0.25324		0.51555	9.15262E-4		0.71554	0.00151
0.44173	1.19936		0.46009	10.8819		0.51585	9.15262E-4		0.71653	0.00151
0.43744	1.25871		0.46397	1.58363		0.51615	9.15262E-4		0.71752	0.00151
0.44387	2.57672		0.46372	4.99978		0.51645	9.15262E-4		0.71851	0.00151
0.4329	3.78758		0.46513	11.2887		0.51674	9.15262E-4		0.7195	0.00151
0.44155	1.41667		0.47826	0.78691		0.51704	9.15262E-4		0.7205	0.00151
0.44827	1.416		0.46314	4.6985		0.51734	9.15262E-4		0.72149	0.00151
0.44393	1.75832		0.49679	0.62596		0.5175	9.15262E-4		0.72248	0.00151
0.43563	3.32405		0.44779	6.56484		0.51764	9.15262E-4		0.72347	0.00151
0.45717	0.6034		0.47428	9.31076		0.51793	9.15262E-4		0.72446	0.00151
0.44226	2.0356		0.47041	3.53714		0.51823	9.15262E-4		0.725	0.00151
0.44253	2.18066		0.46219	0.92249		0.51853	9.15262E-4		0.72545	0.00151
0.45526	1.29908		0.47816	0.5697		0.51882	9.15262E-4		0.72644	0.00151
0.44053	1.58228		0.47232	8.38742		0.51912	9.15262E-4		0.72743	0.00151
0.44799	1.22622		0.45554	2.62309		0.51942	9.15262E-4		0.72842	0.00151
0.44068	8.94263		0.46743	19.8888		0.51972	9.15262E-4		0.72941	0.00151
0.43594	3.00235		0.47466	1.78838		0.52001	9.15262E-4		0.73041	0.00151
0.40674	2.49565		0.44991	8.9665		0.52031	9.15262E-4		0.7314	0.00151
0.4413	0.31614		0.47286	19.4067		0.5205	9.15262E-4		0.73239	0.00151
0.44092	1.2872		0.47372	18.3008		0.52061	9.15262E-4		0.73338	0.00151
0.43345	2.65549		0.47614	2.41679		0.52091	9.15262E-4		0.73437	0.00151
0.45057	0.79198		0.46285	6.33406		0.5212	9.15262E-4		0.735	0.00151
0.44311	4.31608		0.47306	2.20987		0.5215	9.15262E-4		0.73536	0.00151
0.44648	0.57984		0.4534	4.57123		0.5218	9.15262E-4		0.73635	0.00151
0.45586	0.75658		0.4659	3.27723		0.52209	9.15262E-4		0.73734	0.00151
0.46155	1.62584		0.46539	2.75734		0.52239	9.15262E-4		0.73833	0.00151
0.44563	1.57492		0.46906	1.29439		0.52269	9.15262E-4		0.73932	0.00151
0.44488	1.26064		0.46338	3.39924		0.52299	9.15262E-4		0.74032	0.00151
0.47094	0.41735		0.47086	4.80746		0.52328	9.15262E-4		0.74131	0.00151
0.45293	0.30691		0.48613	24.44		0.5235	9.15262E-4		0.7423	0.00151
0.43625	1.14411		0.47656	6.64794		0.52358	9.15262E-4		0.74329	0.00151
0.4439	1.46681		0.47953	2.97637		0.52388	9.15262E-4		0.74428	0.00151
0.44993	1.49979		0.4667	11.8796		0.52418	9.15262E-4		0.745	0.00151
0.44969	1.49709		0.47192	17.1831		0.52447	9.15262E-4		0.74527	0.00151
0.45559	0.37295		0.45784	4.743		0.52477	9.15262E-4		0.74626	0.00151
0.44584	1.46509		0.43024	1.69729		0.52507	9.15262E-4		0.74725	0.00151
0.44408	3.3962		0.4764	12.7413		0.52536	9.15262E-4		0.74824	0.00151
0.43695	9.30826		0.47067	0.95444		0.52566	9.15262E-4		0.74923	0.00151
0.38849	8.15608		0.46791	7.15187		0.52596	9.15262E-4		0.75023	0.00151
0.44748	1.98714		0.46073	2.97797		0.52626	9.15262E-4		0.75122	0.00151
0.43483	1.67174		0.46622	10.4992		0.5265	9.15262E-4		0.75221	0.00151
0.43463	5.03613		0.47191	10.4008		0.52655	9.15262E-4		0.7532	0.00151
0.4747	0.29314		0.46269	18.3275		0.52685	9.15262E-4		0.75419	0.00151
0.43339	1.4466		0.45557	0.53442		0.52715	9.15262E-4		0.755	0.00151
0.43744	1.56701		0.4665	1.8033		0.52745	9.15262E-4		0.75518	0.00151
0.45201	3.07911		0.47072	9.9044		0.52774	9.15262E-4		0.75617	0.00151
0.44597	0.99385		0.51829	6.11009		0.52804	9.15262E-4		0.75716	0.00151
0.4241	0.95062		0.47084	2.76802		0.52834	9.15262E-4		0.75815	0.00151
0.434	7.8862		0.35939	1.47536		0.52864	9.15262E-4		0.75914	0.00151
0.43817	1.46415		0.45034	0.26618		0.52893	9.15262E-4		0.76014	0.00151
0.44787	0.71858		0.46867	12.72		0.52923	9.15262E-4		0.76113	0.00151
0.44287	4.10254		0.46541	4.26764		0.5295	9.15262E-4		0.76212	0.00151
0.4376	3.08225		0.45371	1.0455		0.52953	9.15262E-4		0.76311	0.00151
0.47995	0.24473		0.46354	2.27691		0.52982	9.15262E-4		0.7641	0.00151
0.40164	4.84323		0.46174	3.6165		0.53012	9.15262E-4		0.765	0.00151
0.45195	0.93614		0.46151	4.88229		0.53042	9.15262E-4		0.76509	0.00151
0.4909	0.22828		0.46543	9.70338		0.53072	9.15262E-4		0.76608	0.00151
0.44991	0.97662		0.46009	7.34693		0.53101	9.15262E-4		0.76707	0.00151
0.43858	2.96244		0.47512	3.28172		0.53131	9.15262E-4		0.76806	0.00151
0.44358	1.84268		0.47086	2.94948		0.53161	9.15262E-4		0.76905	0.00151
0.43355	0.82289		0.4406	0.47155		0.53191	9.15262E-4		0.77005	0.00151
0.44051	0.55513		0.46966	5.31856		0.5322	9.15262E-4		0.77104	0.00151
0.44782	2.52161		0.47288	4.39705		0.5325	9.15262E-4		0.77203	0.00151
0.9105	0.43302		0.46753	9.13617		0.5328	9.15262E-4		0.77302	0.00151
0.43771	8.95095		0.46435	7.85216		0.53309	9.15262E-4		0.77401	0.00151
0.36899	0.62726		0.47816	27.3396		0.53339	9.15262E-4		0.775	0.00151
0.44031	3.09242		0.47215	20.2881		0.53369	9.15262E-4		0.77599	0.00151
0.44925	0.51283		0.46693	29.5174		0.53399	9.15262E-4		0.77698	0.00151
0.44198	1.79018		0.46042	28.9225		0.53428	9.15262E-4		0.77797	0.00151
0.46483	0.21878		0.46918	4.99637		0.53458	9.15262E-4		0.77896	0.00151
0.42904	2.26254		0.46399	5.25014		0.53488	9.15262E-4		0.77995	0.00151
0.43575	6.02653		0.46384	11.2669		0.53518	9.15262E-4		0.78095	0.00151
0.44152	3.01024		0.45277	2.56494		0.53547	9.15262E-4		0.78194	0.00151
0.44405	3.54829		0.46773	6.23343		0.5355	9.15262E-4		0.78293	0.00151
0.44616	0.88433		0.46853	23.1066		0.53577	9.15262E-4		0.78392	0.00151
0.4721	0.28421		0.47124	3.97216		0.53607	9.15262E-4		0.78491	0.00151
0.43295	1.31898		0.47761	7.57704		0.53636	9.15262E-4		0.785	0.00151
0.43675	7.15487		0.46457	5.67248		0.53666	9.15262E-4		0.7859	0.00151
0.436	2.26304		0.45568	31.6245		0.53696	9.15262E-4		0.78689	0.00151
0.43697	1.60837		0.4843	1.4389		0.53726	9.15262E-4		0.78788	0.00151
0.4462	1.57817		0.46693	1.71004		0.53755	9.15262E-4		0.78887	0.00151
0.43404	2.4284		0.46293	12.3528		0.53785	9.15262E-4		0.78986	0.00151
0.44244	6.68707		0.47194	12.5105		0.53815	9.15262E-4		0.79086	0.00151
0.438	4.32836		0.45899	7.44236		0.53845	9.15262E-4		0.79185	0.00151
0.44641	3.93592		0.48739	0.93559		0.5385	9.15262E-4		0.79284	0.00151
0.43776	3.61462		0.46605	9.07735		0.53874	9.15262E-4		0.79383	0.00151
0.43636	6.08738		0.48237	16.7371		0.53904	9.15262E-4		0.79482	0.00151
0.43738	1.47072		0.45642	13.0334		0.53934	9.15262E-4		0.795	0.00151
0.44658	2.9548		0.48027	5.32386		0.53964	9.15262E-4		0.79581	0.00151
0.42415	0.31564		0.47344	0.56492		0.53993	9.15262E-4		0.7968	0.00151
0.43425	0.81517		0.45593	5.04472		0.54023	9.15262E-4		0.79779	0.00151
0.43151	1.9816		0.46669	3.98318		0.54053	9.15262E-4		0.79878	0.00151
0.44494	0.93605		0.4763	2.18719		0.54082	9.15262E-4		0.79977	0.00151
0.45224	0.22297		0.46872	12.0877		0.54112	9.15262E-4		0.80077	0.00151
0.43515	7.93972		0.67799	0.31513		0.54142	9.15262E-4		0.80176	0.00151
0.43011	6.94335		0.46159	17.0314		0.5415	9.15262E-4		0.80275	0.00151
0.44168	2.16057		0.46513	5.0808		0.54172	9.15262E-4		0.80374	0.00151
0.44639	0.82918		0.47086	2.93416		0.54201	9.15262E-4		0.80473	0.00151
0.45402	3.87073		0.47818	2.58765		0.54231	9.15262E-4		0.805	0.00151
0.44361	0.58815		0.47972	0.4573		0.54261	9.15262E-4		0.80572	0.00151
0.4004	0.43126		0.46266	4.16357		0.54291	9.15262E-4		0.80671	0.00151
0.42919	2.07611		0.48321	0.42023		0.5432	9.15262E-4		0.8077	0.00151
0.43493	2.25127		0.47403	6.73258		0.5435	9.15262E-4		0.80869	0.00151
0.43057	3.7826		0.45673	0.29913		0.5438	9.15262E-4		0.80968	0.00151
0.4416	7.17187		0.46161	8.80716		0.54409	9.15262E-4		0.81068	0.00151
0.4391	1.30653		0.4677	38.5187		0.54439	9.15262E-4		0.81167	0.00151
0.44364	8.11781		0.46976	5.16162		0.5445	9.15262E-4		0.81266	0.00151
0.43646	2.51462		0.4661	2.68174		0.54469	9.15262E-4		0.81365	0.00151
0.43567	3.08588		0.45953	13.9742		0.54499	9.15262E-4		0.81464	0.00151
0.43722	2.37189		0.47885	11.6909		0.54528	9.15262E-4		0.815	0.00151
0.44815	3.0871		0.47197	2.86165		0.54558	9.15262E-4		0.81563	0.00151
0.43292	4.48173		0.46986	3.14387		0.54588	9.15262E-4		0.81662	0.00151
0.44574	1.08001		0.47417	12.6274		0.54618	9.15262E-4		0.81761	0.00151
0.43716	12.5489		0.45818	8.44806		0.54647	9.15262E-4		0.8186	0.00151
0.44213	0.78701		0.46648	21.1319		0.54677	9.15262E-4		0.81959	0.00151
0.44235	0.44867		0.45603	10.5385		0.54707	9.15262E-4		0.82059	0.00151
0.45318	0.88004		0.46924	1.69507		0.54736	9.15262E-4		0.82158	0.00151
0.44958	1.93968		0.4702	3.77474		0.5475	9.15262E-4		0.82257	0.00151
0.48607	0.28062		0.47366	5.02374		0.54766	9.15262E-4		0.82356	0.00151
0.4424	8.27047		0.47325	0.8529		0.54796	9.15262E-4		0.82455	0.00151
0.44699	0.84567		0.4738	2.21201		0.54826	9.15262E-4		0.825	0.00151
0.44284	0.62717		0.46565	3.07448		0.54855	9.15262E-4		0.82554	0.00151
0.43277	8.99031		0.46689	2.16793		0.54885	9.15262E-4		0.82653	0.00151
0.43629	1.83579		0.47292	5.91093		0.54915	9.15262E-4		0.82752	0.00151
0.46516	0.21216		0.10213	16.6541		0.54945	9.15262E-4		0.82851	0.00151
0.44963	1.40447		0.46923	5.5519		0.54974	9.15262E-4		0.8295	0.00151
0.43437	0.9862		0.48239	1.18843		0.55004	9.15262E-4		0.8305	0.00151
0.44378	3.25117		0.44765	1.50363		0.55034	9.15262E-4		0.83149	0.00151
0.45135	2.11345		0.46427	5.04249		0.5505	9.15262E-4		0.83248	0.00151
0.4117	2.64119		0.94045	0.51829		0.55064	9.15262E-4		0.83347	0.00151
0.4509	2.28111		0.43101	6.81091		0.55093	9.15262E-4		0.83446	0.00151
0.45339	0.58615		0.46966	3.15524		0.55123	9.15262E-4		0.835	0.00151
0.44803	6.26395		0.4726	1.33518		0.55153	9.15262E-4		0.83545	0.00151
0.44546	1.19459		0.47958	0.26246		0.55182	9.15262E-4		0.83644	0.00151
0.43312	3.67892		0.47438	2.18181		0.55212	9.15262E-4		0.83743	0.00151
0.43597	4.55088		0.47297	6.5151		0.55242	9.15262E-4		0.83842	0.00151
0.41261	1.63899		0.46968	10.8031		0.55272	9.15262E-4		0.83941	0.00151
0.43199	1.48101		0.47789	10.6161		0.55301	9.15262E-4		0.84041	0.00151
0.44358	0.83051		0.48003	22.214		0.55331	9.15262E-4		0.8414	0.00151
0.452	0.83241		0.46835	6.11646		0.5535	9.15262E-4		0.84239	0.00151
0.45195	0.76825		0.43694	8.86841		0.55361	9.15262E-4		0.84338	0.00151
0.43833	2.44048		0.47288	7.14846		0.55391	9.15262E-4		0.84437	0.00151
0.43507	6.15347		0.46621	25.5622		0.5542	9.15262E-4		0.845	0.00151
0.43024	2.6569		0.46539	4.71364		0.5545	9.15262E-4		0.84536	0.00151
0.43823	2.36694		0.50082	0.36357		0.5548	9.15262E-4		0.84635	0.00151
0.4317	8.03477		0.45126	14.1899		0.55509	9.15262E-4		0.84734	0.00151
0.42935	1.95876		0.47436	4.08777		0.55539	9.15262E-4		0.84833	0.00151
0.43429	1.3397		0.4677	2.05418		0.55569	9.15262E-4		0.84932	0.00151
0.49443	1.1478		0.47201	3.95895		0.55599	9.15262E-4		0.85032	0.00151
0.46113	0.54031		0.46811	13.0752		0.55628	9.15262E-4		0.85131	0.00151
0.43471	3.95186		0.4651	2.34668		0.5565	9.15262E-4		0.8523	0.00151
0.44521	0.49452		0.47121	6.1343		0.55658	9.15262E-4		0.85329	0.00151
0.42907	0.63226		0.6288	0.20691		0.55688	9.15262E-4		0.85428	0.00151
0.43531	4.96421		0.47375	4.1478		0.55718	9.15262E-4		0.855	0.00151
0.4684	0.36178		0.45567	4.34439		0.55747	9.15262E-4		0.85527	0.00151
0.4299	3.94382		0.45596	17.6843		0.55777	9.15262E-4		0.85626	0.00151
0.43035	4.1427		0.46394	24.1145		0.55807	9.15262E-4		0.85725	0.00151
0.43687	6.80725		0.45824	14.8097		0.55836	9.15262E-4		0.85824	0.00151
0.45011	1.45945		0.47615	12.0793		0.55866	9.15262E-4		0.85923	0.00151
0.43274	1.17388		0.4727	8.24667		0.55896	9.15262E-4		0.86023	0.00151
0.46518	0.6276		0.47462	16.1324		0.55926	9.15262E-4		0.86122	0.00151
0.43893	4.4053		0.46642	16.7012		0.5595	9.15262E-4		0.86221	0.00151
0.43309	3.10004		0.47008	7.08647		0.55955	9.15262E-4		0.8632	0.00151
0.44349	2.06481		0.4656	7.08571		0.55985	9.15262E-4		0.86419	0.00151
0.4528	1.7197		0.46116	3.75429		0.56015	9.15262E-4		0.865	0.00151
0.42975	3.69124		0.47517	1.99924		0.56045	9.15262E-4		0.86518	0.00151
0.43315	3.91913		0.48102	3.90867		0.56074	9.15262E-4		0.86617	0.00151
0.43824	1.6505		0.45749	11.4184		0.56104	9.15262E-4		0.86716	0.00151
0.4426	6.74412		0.46437	9.05838		0.56134	9.15262E-4		0.86815	0.00151
0.44328	4.96624		0.4669	2.07941		0.56164	9.15262E-4		0.86914	0.00151
0.48625	0.30412		0.4583	0.78356		0.56193	9.15262E-4		0.87014	0.00151
0.44504	2.25723		0.46782	10.3248		0.56223	9.15262E-4		0.87113	0.00151
0.47238	0.40265		0.46252	2.2906		0.5625	9.15262E-4		0.87212	0.00151
0.43446	8.48682		0.46273	32.4115		0.56253	9.15262E-4		0.87311	0.00151
0.44169	1.39644		0.47146	0.99942		0.56282	9.15262E-4		0.8741	0.00151
0.4504	0.84427		0.46083	14.7388		0.56312	9.15262E-4		0.875	0.00151
0.44406	1.80081		0.47651	11.3708		0.56342	9.15262E-4		0.87509	0.00151
0.43334	1.21159		0.45493	1.2267		0.56372	9.15262E-4		0.87608	0.00151
0.44117	2.3846		0.45935	4.41695		0.56401	9.15262E-4		0.87707	0.00151
0.4429	2.80819		0.4677	5.98787		0.56431	9.15262E-4		0.87806	0.00151
0.43741	4.84866		0.46438	5.3907		0.56461	9.15262E-4		0.87905	0.00151
0.44491	4.87167		0.46035	14.3243		0.56491	9.15262E-4		0.88005	0.00151
0.45052	0.37956		0.48381	0.37132		0.5652	9.15262E-4		0.88104	0.00151
0.4479	0.86197		0.45714	3.1179		0.5655	9.15262E-4		0.88203	0.00151
0.44279	1.72929		0.46944	8.37845		0.5658	9.15262E-4		0.88302	0.00151
0.44411	0.54092		0.46712	14.23		0.56609	9.15262E-4		0.88401	0.00151
0.44666	0.55258		0.46634	2.50363		0.56639	9.15262E-4		0.885	0.00151
0.47121	0.22389		0.48109	0.57652		0.56669	9.15262E-4		0.885	0.00151
0.46269	0.20821		0.47217	5.92622		0.56699	9.15262E-4		0.88599	0.00151
0.45456	1.26972		0.47051	35.3633		0.56728	9.15262E-4		0.88698	0.00151
0.45178	0.69076		0.46284	9.33409		0.56758	9.15262E-4		0.88797	0.00151
0.44212	3.1391		0.48747	0.69609		0.56788	9.15262E-4		0.88896	0.00151
0.43541	0.81547		0.47222	1.14333		0.56818	9.15262E-4		0.88995	0.00151
0.45199	1.45175		0.46106	29.6466		0.56847	9.15262E-4		0.89095	0.00151
0.44382	2.59149		0.47788	2.41252		0.5685	9.15262E-4		0.89194	0.00151
0.45235	0.66918		0.4665	0.74281		0.56877	9.15262E-4		0.89293	0.00151
0.42996	7.85578		0.46433	6.85824		0.56907	9.15262E-4		0.89392	0.00151
0.44565	7.63525		0.47826	4.46131		0.56936	9.15262E-4		0.89491	0.00151
0.44557	2.84718		0.47176	11.6519		0.56966	9.15262E-4		0.895	0.00151
0.44353	2.59472		0.47109	2.72294		0.56996	9.15262E-4		0.8959	0.00151
0.45361	0.77524		0.46517	1.0282		0.57026	9.15262E-4		0.89689	0.00151
0.45005	0.34836		0.47327	12.9022		0.57055	9.15262E-4		0.89788	0.00151
0.45614	0.49572		0.46293	1.22399		0.57085	9.15262E-4		0.89887	0.00151
0.45785	0.65187		0.46206	0.41539		0.57115	9.15262E-4		0.89986	0.00151
0.4445	2.13829		0.46598	1.09339		0.57145	9.15262E-4		0.90086	0.00151
0.43661	1.80314		0.46226	3.71265		0.5715	9.15262E-4		0.90185	0.00151
0.4489	1.22323		0.46954	9.65977		0.57174	9.15262E-4		0.905	0.00151
0.44599	1.3489		0.47638	11.2667		0.5745	9.15262E-4		0.915	0.00151
0.44546	1.86837		0.46906	3.1021		0.5775	9.15262E-4		0.925	0.00151
0.44572	0.87048		0.47295	3.53828		0.5805	9.15262E-4		0.935	0.00151
0.44052	1.90307		0.46817	5.09876		0.5835	9.15262E-4		0.945	0.00151
0.49854	0.21954		0.47477	4.86365		0.5865	9.15262E-4		0.955	0.00151
0.43583	5.22592		0.4602	1.07229		0.5895	9.15262E-4		0.965	0.00151
0.4338	6.22786		0.46614	0.71084		0.5925	9.15262E-4		0.975	0.00151
0.43808	3.60278		0.46803	18.7387		0.5955	9.15262E-4		0.985	0.00151
0.44179	2.62492		0.47056	12.8354		0.5985	9.15262E-4		0.995	0.00151
0.4325	0.85343		0.46721	19.3802
0.43964	3.22166		0.46921	4.36991
0.44368	0.67985		0.47375	1.99593
0.43196	0.95094		0.46025	5.55177
0.44793	0.39564		0.46901	6.71062
0.43864	2.63958		0.42132	5.0358
0.44219	1.70017		0.45585	0.86478
0.43436	0.88001		0.46919	6.09845
0.44473	0.50001		0.46894	1.49527
0.43248	7.52406		0.47374	6.84395
0.46415	0.21629		0.47221	16.0068
0.43945	6.4954		0.46541	9.8859
0.43291	15.4434		0.46434	28.5631
0.45775	0.52097		0.46348	2.5498
0.45324	0.33775		0.46733	11.8321
0.43852	3.54673		0.47321	12.8003
0.44136	0.34066		0.4785	2.71148
0.4381	1.87673		0.46562	8.30699
0.45836	0.28211		0.47224	2.80616
0.43531	1.14513		0.46808	4.74651
0.43936	5.75144		0.47702	1.45591
0.43482	3.3635		0.51749	0.28706
0.43952	3.67818		0.46403	17.4508
0.43995	5.24764		0.47533	6.33966
0.43647	2.34117		0.45588	8.89042
0.44537	2.052		0.33096	0.5701
0.4504	0.76008		0.46256	10.6645
0.45153	0.36668		0.46393	5.18172
0.44315	0.98727		0.47258	0.68392
0.43678	2.54048		0.47341	1.534
0.45104	1.05009		0.47363	3.12975
0.44667	0.49912		0.46167	7.71984
0.44415	1.76541		0.47156	0.56697
0.35976	0.33422		0.46895	6.32518
0.44304	1.88173		0.46436	1.36552
0.45419	3.72499		0.46388	6.57575
0.44199	2.97729		0.47799	0.8205
0.44656	0.25218		0.50144	0.57559
0.44612	1.27296		0.46799	3.58317
0.44516	7.51874		0.4762	1.05335
0.47095	0.28742		0.47118	4.23737
0.44735	1.88426		0.43391	3.69898
0.43578	7.0676		0.55408	0.7586
0.43349	2.38653		0.47514	2.02812
0.45708	0.73406		0.4704	10.4307
0.45163	0.56402		0.46589	2.37909
0.43834	0.7518		0.45897	8.31066
0.44489	1.12868		0.46392	4.35927
0.46006	0.51972		0.46708	3.02407
0.44892	0.69627		0.47301	3.28164
0.44044	0.49205		0.42837	2.65603
0.44995	4.03144		0.47355	23.5076
0.44525	1.41669		0.46409	2.42623
0.44085	2.2889		0.4584	4.38661
0.43602	12.4976		0.4735	16.3788
0.43962	1.8935		0.4788	0.42606
0.46374	0.34488		0.46736	1.1816
0.44332	1.3763		0.47398	1.22898
0.45018	1.4323		0.46709	7.19654
0.44499	3.11549		0.46868	5.38094
0.44954	0.49573		0.46752	12.3681
0.44084	2.25888		0.46567	2.43939
0.60267	0.40446		0.47248	2.49739
0.93939	0.65223		0.47227	10.9993
0.44925	1.2918		0.49354	0.57908
0.46152	0.87169		0.47276	15.6634
0.43317	6.38968		0.47557	2.33004
0.45126	5.187		0.46958	3.23842
0.45918	0.5916		0.46544	4.92583
0.43728	7.80099		0.46053	8.66613
0.43883	2.36725		0.46188	10.0044
0.43715	7.2677		0.46417	4.56087
0.43993	5.5323		0.45561	0.91707
0.44277	1.93511		0.47853	5.87415
0.43412	3.37447		0.4643	9.17717
0.44742	1.40321		0.41975	1.34268
0.42716	2.8642		0.47537	1.30732
0.43205	6.44105		0.47009	1.50085
0.43821	1.11489		0.47511	2.98221
0.4458	7.50839		0.47474	22.2522
0.44668	0.94988		0.48161	4.80854
0.44954	2.70997		0.47099	2.34778
0.45421	0.95073		0.48149	3.21239
0.43244	2.49472		0.45324	19.3455
0.4275	5.84886		0.46178	7.60416
0.44501	1.68385		0.47501	13.4499
0.44267	2.71701		0.46176	9.75035
0.43128	4.73653		0.47817	2.08618
0.44166	5.60052		0.46149	9.67584
0.12467	0.58041		0.47012	5.72335
0.43513	1.53616		0.45725	3.15051
0.43151	3.74771		0.45766	7.16017
0.44224	3.41213		0.4749	5.3557
0.43308	4.53561		0.4653	4.19016
0.43461	3.61146		0.46977	5.95022
0.44531	2.07236		0.46546	8.9202
0.43299	10.0819		0.47098	1.35488
0.48924	0.27836		0.4618	4.79702
0.44425	1.90855		0.46681	10.6628
0.43718	1.45986		0.46899	2.31142
0.43819	1.67836		0.5045	0.2427
0.44057	2.5565		0.47466	8.04475
0.44521	2.09919		0.46466	5.76484
0.44114	0.76284		0.47259	12.7486
0.44928	1.33587		0.47406	2.35042
0.44133	1.2622		0.5066	0.31453
0.43671	1.71988		0.49041	0.22305
0.4471	6.58737		0.4657	2.10614
0.43104	3.04987		0.5867	0.92273
0.44554	2.28145		0.46846	9.88462
0.44022	4.89859		0.46298	3.28564
0.44662	3.09387		0.4671	3.67006
0.45814	0.42885		0.45931	20.8131
0.42968	5.25121		0.46704	5.70385
0.45524	0.69611		0.47217	3.55811
0.44732	1.15372		0.46017	2.45726
0.43994	2.95025		0.4712	5.68814
0.423	1.72312		0.46209	13.1143
0.43663	4.03922		0.46047	5.9294
0.42731	2.51765		0.46028	20.0214
0.43872	3.83648		0.46125	1.92277
0.3944	1.65116		0.47457	3.37876
0.45771	0.50366		0.46519	15.9201
0.44957	0.81168		0.46819	9.71206
0.46047	0.85602		0.44745	0.35121
0.42565	0.92786		0.46573	12.4662
0.44514	3.06129		0.47025	11.6314
0.43632	5.31317		0.47066	3.48324
0.44972	1.68857		0.47316	7.83033
0.44223	1.81964		0.46986	11.373
0.41568	0.69395		0.46597	1.4602
0.47655	0.3585		0.47014	4.70364
0.44846	2.14666		0.46478	1.78789
0.45303	0.2794		0.47754	0.93995
0.43012	3.72728		0.44797	2.86893
0.44913	1.40912		0.46182	6.05192
0.4732	0.28874		0.47537	15.8416
0.43714	4.27796		0.4549	7.03676
0.45093	0.73736		0.49348	0.58038
0.4373	1.30074		0.468	13.4898
0.43223	0.55532		0.47236	3.2826
0.4416	0.77399		0.47136	2.07011
0.44664	1.98767		0.46827	4.78603
0.42161	4.54933		0.47632	0.6372
0.43942	3.26667		0.46765	6.37645
0.44472	0.72773		0.46566	8.65644
0.42854	7.5987		0.4495	3.36676
0.43891	1.71811		0.46388	14.2147
0.44507	2.37021		0.47395	0.91749
0.43003	6.92439		0.47694	6.55092
0.45112	3.09518		0.47552	3.7515
0.33142	0.36028		0.46761	7.07921
0.39904	2.64026		0.47512	2.73353
0.44184	2.7812		0.48069	3.01151
0.44174	2.51062		0.48754	6.17558
0.45833	0.76365		0.47128	3.90207
0.4484	0.71515		0.46531	16.1432
0.118	0.20934		0.46518	10.3063
0.43956	9.30739		0.50659	0.20156
0.47455	0.32403		0.46656	8.84485
0.44395	5.66841		0.4648	3.80511
0.44828	1.24245		0.49985	0.21527
0.4601	1.06448		0.46554	30.8382
0.43846	4.00343		0.44874	3.09117
0.44697	3.58598		0.45818	1.35042
0.43152	1.91361		0.46477	8.03955
0.43745	5.59557		0.44941	17.1694
0.43238	6.81666		0.44674	5.21953
0.42717	3.72757		0.47566	3.66203
0.44917	3.14027		0.59532	2.20582
0.45666	1.79443		0.46744	10.1386
0.4444	3.8958		0.45821	28.9582
0.44695	2.42618		0.44094	7.81846
0.43927	1.36769		0.46677	7.87561
0.43768	4.58692		0.46322	9.5099
0.42663	1.32118		0.45731	8.80863
0.40186	4.45094		0.47885	0.62922
0.44305	4.83804		0.46101	10.9628
0.44482	3.34396		0.46339	10.1835
0.44579	1.11811		0.46858	5.11131
0.43371	2.34326		0.4724	16.2897
0.43768	1.89453		0.42624	0.99205
0.44465	1.3682		0.47392	7.86639
0.43988	4.76885		0.46024	5.46912
0.43966	13.1212		0.46691	3.9019
0.4521	2.76739		0.47462	4.98925
0.43509	4.60613		0.45754	12.8392
0.44977	1.13112		0.4626	10.1252
0.44309	3.53306		0.4598	9.94874
0.44678	0.48382		0.46472	3.16721
0.45143	5.14588		0.47649	1.35186
0.46325	0.57827		0.46812	16.2099
0.44005	3.07769		0.47425	0.39312
0.43549	1.63794		0.47323	1.11721
0.47799	0.27414		0.4713	3.11359
0.43874	0.77093		0.46911	9.10637
0.44989	0.94518		0.46493	5.09361
0.44672	1.30698		0.46422	3.95015
0.43993	1.67		0.29692	0.25921
0.44277	2.3217		0.47949	0.96795
0.42851	2.68686		0.47812	3.07181
0.46419	0.49725		0.46747	1.24643
0.43483	0.71147		0.48069	4.50722
0.44097	1.20174		0.45888	2.816
0.42706	3.02142		0.46149	6.52709
0.43373	3.6258		0.46953	4.53601
0.44576	0.43146		0.47192	8.39964
0.45079	1.14274		0.47269	1.30204
0.43863	2.70994		0.47022	8.84021
0.43806	4.83827		0.47033	10.292
0.43634	3.31049		0.48114	2.18402
0.42389	5.65907		0.46799	0.41881
0.45586	0.5223		0.49002	0.83601
0.45426	2.66103		0.46534	5.45016
0.44648	2.96869		0.46357	9.29361
0.43106	2.22628		0.47222	5.49833
0.44884	0.2505		0.46158	8.21618
0.44652	0.96614		0.48063	0.45302
0.43536	6.11128		0.47714	0.57441
0.43413	0.6843		0.46695	7.65742
0.44927	0.79496		0.46416	2.23017
0.43861	2.23197		0.48818	0.89232
0.46175	0.45516		0.46356	3.48241
0.44306	1.62578		0.4859	0.37927
0.42879	1.18524		0.46433	16.1918
0.43625	3.64586		0.47226	6.82744
0.43533	6.09881		0.46397	6.63099
0.43466	2.44126		0.46948	9.43459
0.4439	1.92274		0.47538	2.62674
0.4376	2.90266		0.46404	21.7068
0.41335	0.75501		0.46828	16.1159
0.46351	0.55394		0.45657	1.44316
0.44628	2.37297		0.45789	20.03
0.45042	0.89109		0.46422	7.97181
0.4424	1.42412		0.44784	2.53638
0.44028	2.15105		0.4737	3.16354
0.44254	0.60505		0.45908	25.1553
0.43518	4.74861		0.47129	5.85868
0.44425	1.83053		0.46628	8.81067
0.43919	4.78637		0.46798	12.4505
0.44104	7.19021		0.46748	3.00066
0.44762	0.8482		0.45528	4.84046
0.431	0.7362		0.48464	12.0199
0.45315	0.57141		0.46762	5.96569
0.43464	5.06636		0.47154	16.767
0.43977	5.55616		0.47159	5.50203
0.43513	4.68563		0.46491	19.1594
0.44426	0.37934		0.47592	6.69906
0.44228	1.60051		0.47244	4.34525
0.44756	0.8885		0.46565	7.90427
0.45061	6.22283		0.47209	4.34658
0.44174	3.78316		0.46822	3.06097
0.44439	3.04423		0.4695	6.04012
0.43919	8.47653		0.45515	3.4339
0.43047	1.72955		0.47151	5.75651
0.42601	6.61954		0.47813	1.16395
0.44691	1.58837		0.47536	11.7915
0.4522	0.7529		0.46373	23.6955
0.44275	1.67069		0.45806	5.20879
0.43376	7.09605		0.47674	1.97081
0.44554	0.88814		0.47501	2.76417
0.44262	2.0463		0.4623	18.8452
0.45079	2.47368		0.48036	1.29478
0.46059	0.60651		0.4905	0.5159
0.44474	1.72705		0.46314	12.914
0.42788	2.4105		0.47315	1.69102
0.44665	0.59726		0.46203	2.81569
0.43289	1.17196		0.47705	7.57186
0.45456	0.8887		0.47144	26.2773
0.44908	0.61169		0.46536	1.09582
0.43778	4.9483		0.49344	0.33343
0.43649	1.66366		0.46167	6.2348
0.44033	7.00467		0.46412	9.28264
0.43829	6.30412		0.46745	14.349
0.44728	3.75894		0.47239	8.55623
0.43471	15.0001		0.47645	23.6865
0.46761	0.42259		0.467	34.3066
0.43419	4.051		0.5053	0.279
0.45282	1.50316		0.47009	5.52012
0.44417	0.83472		0.46366	3.00489
0.45408	0.55466		0.49205	0.30258
0.44552	1.79958		0.46183	8.09041
0.44225	4.51421		0.44279	28.5584
0.43105	4.33018		0.48232	8.14043
0.44422	1.02262		0.47211	2.44099
0.44364	6.9161		0.46365	5.81625
0.43596	0.49652		0.48618	0.32168
0.45345	1.69938		0.47026	10.0487
0.44516	5.67873		0.46097	3.95582
0.43183	2.68715		0.47309	19.2638
0.43674	7.19121		0.47003	5.60207
0.4473	0.50863		0.47346	8.25596
0.34215	3.41848		0.47467	8.17635
0.43274	1.86104		0.47556	1.05799
0.45702	0.68354		0.46385	4.00021
0.43636	2.30801		0.46165	7.63634
0.43322	4.27578		0.47172	24.1862
0.4555	0.83473		0.47723	5.50853
0.44394	2.90015		0.46664	7.4445
0.4484	6.45119		0.46526	2.27057
0.43054	1.91491		0.48663	0.33112
0.43122	2.71581		0.46841	5.3558
0.454	1.59077		0.46901	2.59064
0.44573	7.06836		0.48559	0.4554
0.44246	0.79247		0.47128	4.05969
0.44876	1.89904		0.4592	10.0311
0.43721	3.20234		0.46767	12.8227
0.42901	1.72399		0.46982	5.85952
0.44174	1.48646		0.47175	12.4848
0.44696	4.4728		0.48186	1.02321
0.43666	18.5079		0.47357	16.6002
0.43384	5.44557		0.48152	0.85481
0.44746	1.59302		0.46362	13.3827
0.43252	1.1301		0.46459	6.76567
0.43505	12.3123		0.47555	2.44447
0.42968	0.25881		0.47612	2.2839
0.44356	1.47884		0.46464	10.7582
0.45389	1.88498		0.47069	5.83395
0.45937	0.36668		0.46871	15.3825
0.90151	0.27283		0.45744	5.29374
0.43397	3.41483		0.48036	0.85964
0.40634	4.0034		0.46485	9.99502
0.44261	4.34998		0.46938	4.18254
0.47075	0.38843		0.47161	0.5112
0.43699	2.26911		0.4571	10.4543
0.4326	2.27062		0.48603	1.39027
0.4486	1.15222		0.478	0.35863
0.43882	2.42511		0.47148	4.69008
0.43596	1.21405		0.49346	0.51819
0.42816	2.41199		0.48176	4.73476
0.43903	2.91264		0.45767	12.0757
0.43145	3.48583		0.46741	21.9202
0.43617	4.6493		0.46702	2.8118
0.44872	1.30095		0.4719	4.51438
0.44636	1.21702		0.48125	5.5407
0.43851	2.95954		0.47777	0.3246
0.45826	1.31199		0.46519	4.83578
0.44188	5.33659		0.46277	13.0915
0.41936	2.28834		0.47821	0.87042
0.42832	3.22722		0.46169	10.5534
0.44195	2		0.44219	3.30677
0.42622	1.54849		0.48936	0.28258
0.43277	5.7661		0.46415	3.58413
0.43607	2.44111		0.47977	4.35903
0.43816	1.68043		0.4624	3.34227
0.44741	1.95579		0.4603	1.8283
0.43736	0.48466		0.43802	2.50568
0.44356	4.93681		0.44734	1.4349
0.45845	0.40474		0.30354	22.2617
0.43507	13.0143		0.4756	4.34837
0.4521	0.93121		0.46385	7.65949
0.45282	0.63231		0.46871	6.5688
0.43299	9.72744		0.46286	5.43563
0.43468	0.9587		0.47632	1.72169
0.40685	5.81348		0.46751	13.135
0.44378	7.55473		0.4667	13.1953
0.43963	4.12344		0.46412	2.07349
0.4405	1.60381		0.47884	0.89696
0.44837	0.88192		0.48768	2.99971
0.44852	4.09597		0.46058	13.3992
0.44374	7.07216		0.47385	1.91369
0.44431	0.9956		0.46518	6.54464
0.43404	3.72832		0.46108	9.44393
0.44377	4.79276		0.47181	0.48308
0.50211	0.20503		0.47007	9.08642
0.47258	0.21433		0.46282	1.7995
0.45575	0.96174		0.47733	21.0097
0.46116	0.51371		0.46304	21.8433
0.53627	4.03752		0.462	1.32776
0.44893	0.60871		0.46189	1.07359
0.44847	1.12371		0.21349	0.21339
0.43336	0.47248		0.47134	5.83222
0.44459	2.67628		0.47807	1.76741
0.48513	0.23253		0.46373	5.14221
0.44175	4.1795		0.46377	7.36457
0.42678	6.70301		0.46036	19.3533
0.4328	2.39848		0.47701	13.4308
0.44936	2.68102		0.47327	1.82006
0.47867	0.23399		0.46029	8.59779
0.43921	6.59571		0.46271	1.69423
0.43815	2.73541		0.46298	0.68766
0.43235	6.60263		0.50122	1.29967
0.42639	1.98862		0.47822	3.04402
0.44654	10.1336		0.44199	3.06247
0.54303	0.24098		0.52422	0.27772
0.44472	3.35766		0.47541	11.8064
0.44829	0.50066		0.4586	9.3072
0.44826	1.10731		0.46235	5.20108
0.46717	0.39219		0.46777	5.3308
0.43354	0.98302		0.46611	5.2882
0.43428	1.11752		0.46953	3.87716
0.43773	1.41432		0.48343	0.30654
0.44445	3.36939		0.47237	11.6289
0.44632	3.09832		0.46432	7.51778
0.44262	0.62239		0.47238	4.99475
0.44319	0.34418		0.47428	6.26176
0.43969	2.28006		0.45844	5.22353
0.44285	5.53218		0.45655	7.91841
0.43307	1.26871		0.47659	3.402
0.43455	4.06073		0.46575	27.828
0.44566	2.59918		0.48348	1.05997
0.43949	1.56272		0.46718	4.44499
0.43727	6.51173		0.46392	8.08169
0.43561	6.61193		0.47774	1.184
0.439	1.66194		0.53785	0.20699
0.44517	2.94298		0.47266	4.0343
0.43041	2.04132		0.459	2.71215
0.4526	2.15379		0.48105	4.73966
0.43717	4.62644		0.46601	6.56849
0.45475	0.66448		0.46286	4.51833
0.4436	0.65893		0.47394	0.80269
0.44994	7.03457		0.47582	11.186
0.43932	1.87818		0.46885	16.7166
0.43947	1.76266		0.47068	2.30768
0.42911	1.41411		0.47095	7.20203
0.44184	4.20572		0.46415	3.23154
0.43012	4.01002		0.47914	1.41196
0.43198	3.11826		0.46948	2.08118
0.44655	3.11909		0.46673	9.92259
0.44535	2.10228		0.47544	0.66945
0.43331	0.70437		0.46542	5.74705
0.44733	1.17703		0.46673	10.9724
0.43773	3.09785		0.47589	6.74071
0.43795	0.75656		0.46867	3.14852
0.44209	6.57983		0.44727	10.2151
0.43733	6.89513		0.46513	10.0168
0.45976	0.65641		0.47353	1.4577
0.42986	0.64611		0.46815	17.5418
0.43054	4.33139		0.46795	1.62659
0.43617	4.1043		0.47559	4.35118
0.43752	1.65742		0.46655	5.37589
0.45404	1.38714		0.45993	0.97221
0.43988	4.78673		0.46245	1.92668
0.47267	0.48243		0.47206	22.3719
0.44386	3.12713		0.47318	8.42705
0.47391	1.02416		0.46769	1.99607
0.42922	5.89374		0.4697	8.08537
0.43599	1.50588		0.4663	4.50979
0.43338	3.20929		0.47272	1.70632
0.43837	1.71915		0.46001	14.6634
0.43571	7.09115		0.40091	28.9163
0.45932	0.30643		0.47135	2.45959
0.43754	2.17959		0.46063	2.58823
0.44672	0.44328		0.4632	9.75187
0.42542	1.37282		0.44916	5.17915
0.43296	8.36644		0.46278	8.47345
0.44807	1.93558		0.47767	1.55696
0.44274	1.47495		0.46085	5.07796
0.44711	1.26971		0.47193	5.95984
0.44026	1.78851		0.47664	2.22298
0.43585	5.65469		0.46095	3.92097
0.43017	3.24049		0.46758	9.36092
0.44169	3.34979		0.46942	1.17914
0.43837	4.85082		0.46001	3.6757
0.44108	1.54007		0.46388	3.98632
0.41232	7.3677		0.47688	16.652
0.47269	0.30406		0.477	6.44334
0.45018	6.90853		0.46795	5.79018
0.44082	3.32368		0.46855	5.36063
0.42914	5.16091		0.4674	21.8663
0.45413	1.67513		0.48741	1.01666
0.44041	2.10829		0.47308	0.77181
0.43539	0.99257		0.4703	1.63676
0.44587	1.26693		0.47008	1.6942
0.44664	1.49159		0.49474	0.22651
0.44601	0.68807		0.4556	19.1812
0.42278	1.38203		0.46193	16.6093
0.43929	1.14812		0.4753	0.80592
0.43252	4.63331		0.66602	0.42256
0.43257	1.72544		0.46572	2.53292
0.45533	0.52309		0.4713	2.92932
0.45871	0.31381		0.48866	0.68431
0.44126	0.74717		0.45937	2.00356
0.46739	0.20349		0.47323	0.25447
0.43647	6.05183		0.4869	0.29013
0.44935	4.20097		0.45653	1.46755
0.4412	2.976		0.47461	4.52042
0.43558	3.18788		0.47288	2.46023
0.46217	0.98011		0.49909	0.47763
0.40884	4.90772		0.47046	10.2602
0.43941	1.08386		0.47875	6.33352
0.44352	3.23179		0.46768	36.6385
0.43067	2.0943		0.47668	0.64781
0.4477	0.42198		0.46454	5.84702
0.43656	1.05969		0.46589	14.1225
0.43558	2.29186		0.47526	13.4946
0.43123	3.34678		0.46556	1.31243
0.43109	2.03092		0.47238	2.55182
0.48277	0.39855		0.44326	5.25621
0.42299	1.19784		0.48711	0.35817
0.43137	0.45074		0.44524	14.0218
0.42925	0.42353		0.47543	1.87082
0.43999	1.9241		0.4772	0.93174
0.44652	1.68342		0.43711	1.43751
0.38061	202.557		0.43923	4.63497
0.44928	0.20023		0.47694	0.33187
0.43906	1.06115		0.43019	17.4766
0.43107	1.05791		0.43024	11.0384
0.46756	0.41432		0.45064	0.5674
0.4428	4.33564		0.433	0.76127
0.44533	2.0202		0.4383	9.1114
0.43854	2.28214		0.45083	2.02775
0.43129	1.72523		0.44021	8.30967
0.48771	0.26202		0.33693	0.24439
0.442	5.73006		0.41723	0.38341
0.43978	3.40039		0.43983	5.4901
0.46224	0.88906		0.43792	1.82131
0.45331	3.94268		0.11146	3.56253
0.45083	0.54078		0.43516	3.3162
0.45707	0.71595		0.43273	4.08739
0.45346	4.22709		0.47155	32.4618
0.44242	10.4196		0.46513	21.4316
0.44376	1.99512		0.47526	21.7499
0.44884	2.94672		0.46698	2.5796
0.38992	3.79926		0.4675	5.11848
0.45093	0.74056		0.47151	2.53134
0.4459	1.8363		0.47208	2.08
0.44158	8.49656		0.42421	0.45737
0.43989	1.84242		0.46398	6.96085
0.44889	3.24608		0.49225	0.35189
0.45608	0.46926		0.46749	2.61985
0.43557	1.87219		0.48095	1.9525
0.43864	10.8271		0.46817	8.89399
0.45226	2.44214		0.45288	7.09692
0.45337	5.09879		0.46283	12.6203
0.44062	2.32419		0.46533	1.01394
0.4512	0.88076		0.47718	14.4305
0.44986	0.59258		0.46702	4.72269
0.43447	3.60618		0.46462	5.21967
0.44755	0.77387		0.48083	7.78775
0.439	0.53484		0.47518	2.46658
0.46952	0.34143		0.4658	5.87885
0.46623	0.79098		0.47093	2.28259
0.45139	1.57198		0.45813	2.31806
0.35182	1.95722		0.45973	6.79011
0.43863	1.04351		0.46161	6.89119
0.49176	0.2799		0.46978	6.03862
0.44852	0.67223		0.47384	11.3959
0.43334	6.14461		0.47822	0.31676
0.45162	3.70313		0.46201	7.4269
0.4409	1.84691		0.46165	9.86045
0.45517	0.76473		0.42626	0.39421
0.44749	1.41176		0.47092	1.06947
0.45276	1.25269		0.45458	3.46981
0.44682	3.31613		0.46244	4.12341
0.45214	0.52844		0.47501	2.17023
0.43896	3.20054		0.46795	3.74096
0.43188	1.32365		0.45	0.34325
0.44029	6.93634		0.45712	13.4506
0.40897	5.12933		0.44214	22.1439
0.45767	0.44423		0.46307	3.33129
0.41043	7.24775		0.46202	1.64361
0.44645	2.38099		0.47411	2.0694
0.43529	1.96918		0.46595	6.69576
0.44704	7.34981		0.46282	19.5169
0.44536	1.56858		0.44906	10.6655
0.44484	2.98833		0.46066	2.90372
0.45089	5.10291		0.4732	2.68778
0.43855	1.26168		0.46578	4.013
0.45603	1.50975		0.46595	2.58116
0.44172	1.60631		0.46774	3.3301
0.45075	2.17806		0.47017	8.56412
0.44389	1.81133		0.46877	2.47782
0.44009	9.27898		0.46818	6.16131
0.43749	1.06869		0.23185	4.2289
0.44104	1.23238		0.46487	17.655
0.43744	2.84418		0.45474	28.7065
0.43858	2.72448		0.46777	9.81578
0.44175	3.37561		0.46627	4.24816
0.46228	0.62631		0.46625	21.8102
0.45426	7.45751		0.46824	6.43723
0.43644	1.80675		0.47364	24.5583
0.43799	1.07632		0.74801	2.72281
0.44049	1.44575		0.47594	7.95904
0.43585	9.76856		0.45641	1.21503
0.4439	2.89984		0.4739	5.95642
0.44543	4.40471		0.47594	0.70465
0.46063	1.61232		0.50506	0.30168
0.4398	3.22403		0.46935	5.88897
0.43552	2.83845		0.46954	6.27544
0.46351	0.56084		0.47713	1.14114
0.44566	1.7695		0.46524	3.41122
0.44678	1.94845		0.46882	4.74199
0.44724	0.38148		0.47767	7.83259
0.44143	0.58713		0.46199	13.2869
0.44633	3.83512		0.47477	5.05453
0.45033	3.04107		0.46917	3.09588
0.45878	2.52302		0.47352	6.75116
0.44299	1.65282		0.46664	24.7028
0.44319	2.09784		0.46832	3.62699
0.43356	3.13438		0.46375	2.39832
0.44239	1.51931		0.46065	15.6651
0.45545	2.76029		0.47261	2.44024
0.44822	1.14024		0.46829	14.3643
0.43689	3.16647		0.42187	5.59719
0.44642	7.0161		0.4697	5.0908
0.44195	4.27197		0.35716	0.29992
0.45192	0.77031		0.46946	2.54706
0.45181	3.58826		0.46711	8.55152
0.44441	1.29801		0.47171	6.76232
0.44162	6.19204		0.09497	8.5665
0.45254	4.52966		0.46807	1.8554
0.44463	6.18866		0.48095	0.38269
0.45973	1.55144		0.4588	3.13969
0.44029	6.19508		0.69933	0.22437
0.46581	0.58085		0.47626	2.23802
0.43211	1.67992		0.47904	2.63747
0.43986	7.70609		0.44966	0.75321
0.46551	0.6161		0.48044	1.43097
0.44339	1.65906		0.47351	20.3153
0.46485	0.35351		0.47569	16.1242
0.44337	1.53631		0.47541	3.48144
0.45455	0.93901		0.46176	2.02984
0.43329	14.1613		0.47991	9.07616
0.44539	0.90401		0.46311	5.90922
0.46084	3.15713		0.45418	24.1393
0.44671	0.39692		0.46965	2.78966
0.43596	1.59197		0.47421	5.0704
0.43915	5.59692		0.46486	9.05965
0.43678	3.18736		0.46495	4.66663
0.46859	0.57483		0.4693	28.3668
0.44813	1.57197		0.4854	8.46364
0.45321	1.29365		0.46321	6.45464
0.47276	0.26395		0.47054	2.47481
0.44116	5.92035		0.46947	7.8487
0.44396	1.39479		0.45176	2.62844
0.43588	4.41311		0.48116	1.01245
0.43909	2.88955		0.46073	7.79987
0.45049	4.36558		0.46533	19.654
0.44785	0.43988		0.45877	10.4184
0.44125	5.92553		0.45996	6.82379
0.46179	6.28355		0.45973	14.3887
0.45061	2.94715		0.46046	2.11111
0.44255	1.32671		0.48556	12.6234
0.44744	1.41673		0.46419	11.2789
0.46101	1.49569		0.47488	2.28663
0.4474	1.79756		0.46483	15.2745
0.45075	0.62847		0.51001	0.3588
0.45567	0.33074		0.47269	2.4993
0.44222	3.28056		0.45555	10.7074
0.44303	2.68832		0.46061	1.46215
0.43869	3.55256		0.48013	2.07895
0.43346	5.65835		0.20051	2.80105
0.47151	0.39934		0.46097	1.23576
0.43772	1.18673		0.46845	3.86296
0.44661	4.54898		0.47248	18.6308
0.45545	5.31571		0.46957	9.38589
0.45056	7.06051		0.47299	7.85039
0.44433	1.01471		0.47606	10.0548
0.43945	3.92107		0.47012	1.78263
0.4687	0.5296		0.46341	6.09434
0.43979	5.16866		0.45017	1.78712
0.43768	6.24211		0.47258	9.64149
0.44671	5.67697		0.47012	14.0472
0.45007	1.35951		0.46582	6.90602
0.4411	3.77361		0.4926	0.74351
0.44262	1.836		0.48206	3.50577
0.44783	9.05254		0.46103	21.6272
0.45061	1.70717		0.47625	2.49558
0.46443	3.38895		0.46843	20.8072
0.45415	1.17974		0.46904	3.15456
0.45293	0.83572		0.46456	19.2603
0.45407	0.94385		0.46537	2.25175
0.43349	2.94287		0.45893	2.45158
0.45561	0.57045		0.47426	2.45215
0.46432	0.84621		0.46756	1.72392
0.44133	1.08071		0.46546	13.5515
0.43591	2.77064		0.46463	2.95527
0.44451	5.33174		0.46699	4.74653
0.44226	2.30312		0.47254	1.55997
0.4354	2.55362		0.46266	3.82226
0.44417	1.08004		0.46773	2.86612
0.45628	0.59847		0.47084	25.1109
0.44532	1.32126		0.46736	1.52083
0.42799	0.76623		0.46764	16.3706
0.45134	1.49657		0.4678	2.06813
0.46722	0.22869		0.47056	12.2871
0.43379	2.24206		0.46856	13.0709
0.43819	3.04184		0.46924	13.816
0.40967	2.77061		0.45948	2.34887
0.44624	1.12234		0.45696	10.5789
0.44319	3.95349		0.45521	11.7989
0.44821	9.01183		0.47843	7.723
0.4349	2.30083		0.46038	2.97505
0.1999	333.786		0.47156	2.87262
0.45676	7.58754		0.46518	5.95605
0.43996	1.48447		0.45579	8.45491
0.43117	0.91917		0.57058	0.4827
0.46871	0.30434		0.47584	1.87881
0.45306	1.61147		0.46267	6.06815
0.44156	0.67588		0.47106	6.06557
0.43591	3.92862		0.46588	1.17553
0.45232	0.56775		0.46111	3.93967
0.45336	2.28746		0.47113	6.9765
0.45738	0.98387		0.46465	12.2381
0.45251	2.04147		0.46682	4.05926
0.4566	0.68965		0.46022	21.5787
0.43428	0.75041		0.46872	1.18608
0.52744	0.22389		0.47045	3.23994
0.45153	0.30742		0.46479	0.97884
0.43034	3.86736		0.48317	0.36249
0.45027	1.12053		0.45893	1.57859
0.43927	4.07958		0.47004	3.25965
0.49237	0.21646		0.46264	25.9681
0.44424	3.32401		0.45969	4.45052
0.43773	7.42848		0.4754	3.12517
0.4892	0.21599		0.46395	5.81104
0.45149	1.40494		0.47176	1.24338
0.44576	1.43781		0.49847	0.2758
0.45003	4.25652		0.46477	9.22508
0.43395	1.6399		0.49432	0.33104
0.44477	2.46643		0.4762	2.42195
0.4571	1.70962		0.46745	14.6876
0.43928	2.59839		0.46772	9.23378
0.44241	0.65893		0.4671	4.34539
0.45746	0.51193		0.46908	0.61949
0.41236	5.80641		0.46025	4.18198
0.4549	4.3246		0.47349	6.42806
0.43803	2.70317		0.47662	15.5729
0.39339	5.29874		0.47179	0.84271
0.45398	0.59983		0.46327	9.93989
0.4427	8.99328		0.46268	2.75022
0.45032	3.64668		0.45466	1.00668
0.46317	0.77454		0.48468	3.2948
0.45502	2.28116		0.46392	4.39045
0.44823	2.02319		0.48113	0.37595
0.44067	3.91837		0.47708	3.06597
0.44169	8.67107		0.4672	16.6931
0.43919	6.08326		0.46373	7.63734
0.44585	5.85175		0.45495	9.84663
0.4412	1.07655		0.47963	1.04795
0.44415	2.27048		0.46856	15.1433
0.44299	2.59888		0.46788	13.0277
0.4624	0.49939		0.22264	0.21119
0.43496	2.07131		0.34608	0.63786
0.45517	1.4121		0.47845	1.07289
0.43795	2.55714		0.47126	1.81888
0.43669	1.76639		0.46818	10.9863
0.44072	2.01971		0.4668	0.89974
0.44078	7.17026		0.46516	11.6071
0.4577	0.98773		0.45191	1.73403
0.4475	2.19869		0.47077	6.37682
0.44989	2.17596		0.47069	5.95411
0.37566	0.28521		0.4627	5.11802
0.44334	0.35564		0.46281	8.33713
0.45206	1.69969		0.47822	8.66962
0.4405	4.03128		0.47763	2.24836
0.43108	2.87221		0.47191	0.35238
0.44157	5.76642		0.47407	7.10416
0.44144	3.61508		0.47049	11.604
0.45702	0.3843		0.4663	2.1568
0.4369	3.02683		0.4755	2.15443
0.44872	2.48354		0.47707	4.86446
0.44671	3.03104		0.47592	10.8239
0.44454	1.22816		0.4785	4.45123
0.43104	1.01159		0.4652	4.38055
0.43924	2.53962		0.48257	6.75682
0.45168	2.13232		0.47558	14.0887
0.44432	6.41637		0.46272	1.51056
0.44631	0.89459		0.47492	8.7916
0.43817	4.91221		0.46939	19.1119
0.4673	0.59258		0.46627	1.06518
0.45827	1.11751		0.47325	12.7065
0.44853	2.98205		0.47237	1.84349
0.4517	2.30473		0.46766	4.25833
0.44463	3.99853		0.47574	2.25758
0.44514	3.8645		0.45614	0.58682
0.44397	2.46607		0.4698	3.12911
0.45259	0.96002		0.47689	0.65171
0.45143	4.92991		0.46773	6.83812
0.46716	0.41953		0.46209	2.1951
0.42027	15.4087		0.47376	2.29684
0.42879	0.68097		0.47041	1.74683
0.4499	1.81661		0.46577	3.51612
0.43572	4.15622		0.43595	1.13091
0.44796	2.92011		0.46633	7.04636
0.45561	1.91589		0.47732	1.15541
0.45249	13.0093		0.48865	0.38346
0.44639	1.02363		0.46814	0.52341
0.43611	5.50867		0.4635	3.57786
0.43727	3.64079		0.47199	4.87947
0.44024	5.52675		0.47805	0.25388
0.46298	0.58475		0.47131	3.26809
0.44042	1.32021		0.4679	9.97473
0.44147	0.78935		0.46672	4.91865
0.50641	0.44497		0.47545	2.78665
0.44264	1.90487		0.46612	1.86482
0.43956	1.67967		0.46426	2.31096
0.43674	2.8709		0.46837	10.8204
0.46998	0.40453		0.47413	26.7795
0.45695	0.49877		0.46263	4.18365
0.44902	0.27627		0.46955	7.22239
0.43152	2.3729		0.47235	4.36257
0.44412	3.02467		0.47679	4.53197
0.4383	2.18964		0.46781	11.8559
0.43598	5.20645		0.47242	6.36688
0.47166	0.26982		0.46408	9.602
0.44791	7.39457		0.47282	5.46366
0.44826	3.02441		0.47557	8.08342
0.45055	0.77969		0.47937	2.21027
0.43955	5.18189		0.47487	3.71819
0.43438	0.95524		0.4659	5.45906
0.43964	3.09085		0.47598	2.67646
0.44629	5.81859		0.47881	6.73019
0.46961	1.71978		0.44547	0.4511
0.44032	5.64254		0.47025	1.48189
0.44764	0.81612		0.41255	5.976
0.45942	0.42078		0.46249	5.60206
0.4333	5.31701		0.43217	2.5527
0.44299	5.35892		0.4699	1.44716
0.44522	1.1043		0.47091	1.67545
0.44696	4.63871		0.47631	2.80657
0.46009	1.34017		0.45486	11.4006
0.43805	1.7989		0.70496	0.26766
0.44065	0.81958		0.46359	4.54245
0.49079	0.26488		0.47655	1.25414
0.44836	2.11896		0.47798	4.97166
0.44642	1.99279		0.4768	9.59813
0.45373	5.70035		0.49327	0.31548
0.44411	4.352		0.46096	11.7996
0.44147	9.34493		0.46331	7.42637
0.44285	2.6126		0.46987	6.77582
0.44879	2.07632		0.46694	2.39505
0.45147	0.68269		0.43919	0.3068
0.44593	2.03211		0.47991	3.3004
0.4403	4.6445		0.47088	4.98553
0.4478	0.75325		0.47236	3.45851
0.44648	0.49484		0.46624	23.8517
0.44163	12.7839		0.45812	5.22644
0.44787	1.71156		0.46212	5.31479
0.43987	11.7995		0.47657	3.83003
0.43591	5.91053		0.45897	1.05349
0.09481	0.20064		0.47882	1.16725
0.39306	3.81952		0.47094	14.1076
0.45783	2.7881		0.46587	9.05204
0.43337	0.47527		0.48017	3.86336
0.43781	0.28333		0.46826	7.87076
0.44094	6.16511		0.46542	4.71681
0.40791	3.56831		0.45206	22.4232
0.44995	1.40348		0.44691	11.0368
0.43551	2.7998		0.47527	7.48913
0.4429	2.25135		0.46759	4.06047
0.44945	2.05924		0.46844	0.64571
0.45451	0.60225		0.47332	1.95032
0.45031	2.50123		0.47558	8.11964
0.42716	4.77452		0.4624	6.23833
0.44675	3.27851		0.4764	4.43905
0.44047	1.95632		0.45885	9.44259
0.44657	1.15409		0.46518	2.22029
0.44386	2.80387		0.45406	4.28709
0.44417	1.07072		0.46524	2.08714
0.4527	0.77703		0.46198	6.0194
0.45899	1.08703		0.46793	0.57717
0.43673	0.77016		0.46302	1.17349
0.42902	2.40174		0.46682	9.63479
0.44553	2.78976		0.3729	1.11865
0.44876	0.53444		0.47064	4.08617
0.4624	1.057		0.45659	34.1611
0.43928	4.65957		0.47456	0.28606
0.44054	1.07241		0.48215	13.9387
0.44535	1.99436		0.4557	9.43706
0.44613	3.95068		0.46833	2.34763
0.44668	1.89458		0.58991	1.82354
0.4648	0.74806		0.58904	1.16383
0.45155	5.36407		0.47308	25.9409
0.44748	2.38632		0.47825	10.2162
0.44058	3.41487		0.46705	6.17896
0.44801	1.2828		0.46078	4.62374
0.43938	2.93071		0.4671	0.66072
0.45296	0.68242		0.4685	1.84266
0.43044	1.71944		0.47359	13.4274
0.42416	5.95015		0.47996	4.02236
0.45494	0.83855		0.46615	0.25163
0.4703	0.30264		0.486	2.10133
0.42896	5.04308		0.47855	0.91826
0.4317	2.14585		0.47016	6.2993
0.46203	0.22273		0.4772	4.08434
0.46725	0.56772		0.46352	13.9261
0.44118	2.32256		0.47194	18.1317
0.46749	0.28535		0.46	17.7919
0.43308	6.67866		0.47124	5.09981
0.4551	2.76543		0.48473	1.60693
0.44715	1.96682		0.4607	9.4759
0.4481	0.95591		0.46456	21.6626
0.44456	5.66598		0.48474	0.50034
0.44213	5.79811		0.46213	1.7214
0.43225	5.31375		0.47238	2.72379
0.43516	5.55107		0.48762	0.28364
0.45067	5.20518		0.45999	6.621
0.45805	0.60033		0.46556	5.72299
0.44005	0.54109		0.47736	7.14403
0.45222	1.11321		0.46436	19.2912
0.45297	0.76489		0.4667	9.94132
0.43315	4.82283		0.45233	0.23574
0.44266	1.11421		0.4622	4.95338
0.45894	0.7004		0.46785	29.7666
0.43926	6.40419		0.47109	5.39467
0.45012	4.09978		0.47928	0.6269
0.42855	3.35938		0.48324	0.8685
0.43285	7.39375		0.46415	4.14122
0.4488	4.04654		0.47623	1.94693
0.48236	0.22811		0.46752	9.55487
0.45485	0.66842		0.46183	11.1819
0.44315	1.96015		0.472	8.79899
0.44868	11.8786		0.46757	1.02599
0.3921	0.36099		0.46036	6.90571
0.4442	0.73814		0.4699	10.6822
0.44761	0.352		0.44896	7.18305
0.49829	4.62554		0.4761	0.68858
0.44075	3.45353		0.49317	0.40694
0.43745	2.57209		0.27114	6.85185
0.45366	1.96103		0.47709	5.66731
0.45321	1.73421		0.45431	0.45251
0.45095	5.56091		0.45849	1.58681
0.44236	1.58368		0.46969	4.33585
0.4408	1.63883		0.48056	5.01754
0.46134	1.66908		0.47187	1.71551
0.43946	1.19869		0.46477	4.95445
0.44068	1.64837		0.45345	2.34694
0.43607	3.20026		0.46125	2.11605
0.45245	0.86979		0.46048	3.74894
0.4352	10.5429		0.46165	4.23951
0.44724	2.99494		0.47182	6.57246
0.44419	2.19326		0.46939	1.84726
0.43968	4.69267		0.47599	4.58802
0.44542	1.8576		0.45381	13.2173
0.44498	1.77683		0.4928	0.25365
0.44012	3.89242		0.4618	8.14831
0.45338	4.92388		0.47047	3.17613
0.43258	0.23348		0.47133	0.75868
0.45863	0.617		0.60238	0.83636
0.44656	1.99498		0.42896	3.5855
0.44106	3.16615		0.47608	1.97875
0.46284	1.20035		0.46822	22.1679
0.46438	0.56651		0.49543	7.29244
0.46381	0.51108		0.48609	0.80366
0.42462	1.95268		0.57934	1.00569
0.44355	6.23692		0.47295	3.65975
0.44699	4.72907		0.48021	18.2447
0.47083	0.92246		0.4727	4.96697
0.4407	4.94264		0.49512	0.32186
0.44436	6.38495		0.4602	9.54415
0.4417	7.30703		0.47066	14.5739
0.44434	2.61415		0.46662	16.3356
0.44911	1.14263		0.47007	2.71373
0.43961	3.47251		0.47256	3.99618
0.44369	0.60904		0.48048	0.71838
0.43361	3.1965		0.46352	4.7163
0.44818	2.37203		0.46664	12.5973
0.45989	0.53586		0.46903	1.85983
0.44244	0.95212		0.4695	8.18649
0.43537	3.5155		0.46355	0.95146
0.43692	1.88527		0.45641	13.0098
0.452	1.50445		0.4701	5.9583
0.43683	1.5731		0.47749	2.72673
0.44339	4.46432		0.47587	4.20666
0.45129	1.52023		0.43406	10.6923
0.4591	4.06616		0.44752	20.4333
0.45565	1.09097		0.47721	1.32772
0.43994	8.39007		0.4673	5.47173
0.44148	1.38766		0.47284	0.98392
0.44139	1.42059		0.47723	2.85209
0.44582	2.44317		0.46173	4.14035
0.44919	1.5368		0.4992	0.29115
0.41154	4.73557		0.46212	13.6304
0.43527	1.27304		0.47246	11.0353
0.44523	1.12583		0.47082	2.10263
0.45833	0.44461		0.46441	2.56657
0.44747	0.65128		0.48259	6.49705
0.43579	1.20108		0.46369	7.178
0.44335	4.48853		0.45762	6.21179
0.44871	0.79445		0.47141	0.576
0.44283	0.25104		0.61673	0.26277
0.45341	0.23026		0.46509	11.202
0.4656	0.30605		0.47217	3.79377
0.44689	7.58323		0.48964	1.2155
0.44712	2.73711		0.46505	2.01088
0.47682	0.33355		0.47066	14.2123
0.5787	0.26727		0.4758	2.10808
0.45658	0.97496		0.46469	4.23897
0.44041	3.9526		0.45674	6.28685
0.39878	0.20298		0.47186	4.47114
0.38146	0.20083		0.4761	4.42714
0.43591	13.7966		0.45885	1.96896
0.45055	1.71573		0.46088	1.21551
0.44844	0.7522		0.47432	3.42483
0.45351	1.51604		0.47881	18.7326
0.43769	0.41314		0.46298	5.19719
0.44122	1.8343		0.46654	7.07119
0.46253	1.65725		0.46317	23.4563
0.48944	0.26905		0.46035	18.7021
0.44217	3.05602		0.47425	6.56046
0.47052	0.27428		0.46646	3.17147
0.45426	2.81255		0.49395	0.52352
0.443	2.10807		0.47473	5.15232
0.43362	4.31493		0.46482	2.10258
0.45148	0.77936		0.47266	4.03047
0.44411	2.84476		0.47429	3.67173
[truncated: 9,495 more rows]

## Sheet: Fig.  6h
		OD-1	OD-2	OD-3	OD mean	OD s.d.
1	blank	0.1031	0.1024	0.1018	0.10243	0.000650641
2	L-#1	0.2444	0.2427	0.2421	0.24307	0.00119
3	H-#1	0.3782	0.3756	0.3747	0.37617	0.00182
4	L-#6	0.1738	0.1714	0.171	0.17207	0.00151
5	H-#6	0.2104	0.2083	0.2088	0.20917	0.0011
